# Supplementary material for: Transcriptome Analysis Provides Insights into Catalpol Biosynthesis in the Medicinal Plant Rehmannia glutinosa and the Functional Characterization of RgGES Genes
Source: MDPI journal article supplement (doi:10.3390/genes15020155), 2024-01-24
Supplement: s1 [file s1]

Supplementary Table S8. Accession numbers of PSPGs used for phylogenetic analysis in Figure 6.

| Name      | Species                       | Functions                                              | Accession No. |
|-----------|-------------------------------|--------------------------------------------------------|---------------|
| Cm1,2RhaT | <i>Citrus maxima</i>          | Flavanone 7-O-glucoside 1,2-O-rhamnosyltransferase     | AAL06646      |
| UGT94D1   | <i>Sesamum indicum</i>        | Sesaminol 2-O-glucoside                                | BAF99027      |
| BpUGAT    | <i>Bellis perennis</i>        | Anthocyanidin 3-O-glucoside 1,2-O-glucosyltransferase  | BAD77944      |
| In3GGT    | <i>Ipomoea nil</i>            | Anthocyanidin 3-O-glucoside 2''-O-glucosyltransferase  | AB192314      |
| 6RhaT     | <i>Petunia hybrida</i>        | Anthocyanidin 3-O-glucoside 1,6-O-rhamnosyltransferase | CAA50376      |
| ZOG1      | <i>Phaseolus lunatus</i>      | Zeatin O-glucosyltransferase                           | AF101972      |
| ZOX1      | <i>Phaseolus lunatus</i>      | Zeatin O-xylosyltransferase                            | AF116858      |
| UGT72E2   | <i>Arabidopsis thaliana</i>   | Oniferylalcohol glucosyltransferase                    | AB018119      |
| UGT72B1   | <i>Arabidopsis thaliana</i>   | Hydroxybenzoic acid glucosyltransferase                | CAB80916      |
| UGT71G1   | <i>Medicago truncatula</i>    | Flavonoid 3'-O-glucosyltransferase                     | AAW56092      |
| UGT71C1   | <i>Arabidopsis thaliana</i>   | Hydroxycinnamate, flavonoid 3-O-glucosyltransferase    | AC005496      |
| NtGT1a    | <i>Nicotina tabacum</i>       | Glucosyltransferase with broad substrate specificity   | AB052558      |
| NtGT3     | <i>Nicotina tabacum</i>       | Glucosyltransferase with broad substrate specificity   | AB072918      |
| UGT73C5   | <i>Arabidopsis thaliana</i>   | Zeatin O-glucosyltransferase                           | AAD20156      |
| SaGT4a    | <i>Solanum aculeatissimum</i> | Seroidal sapogenin 3-O-glucosyltransferase             | BAD89042      |
| B5GT      | <i>Dorotheanthus</i>          | Betanidin 5-O-glucosyltransferase                      | Y18871        |
| CaUGT2    | <i>Catharanthus roseus</i>    | Curcumin glucosyltransferase                           | AB159213      |
| F7GT      | <i>Scutellaria</i>            | Flavonoid 7-O-                                         | BAA83484      |

|          |                                 |                                                              |            |
|----------|---------------------------------|--------------------------------------------------------------|------------|
|          | <i>baicalensis</i>              | glucosyltransferase                                          |            |
| UGT75B1  | <i>Arabidopsis thaliana</i>     | Indole 3-acetic acid,<br>sinapic acid<br>glucosyltransferase | AAF79370   |
| NtGT2    | <i>Nicotina tabacum</i>         | Flavonol 7-O-<br>coumarin 3- O-<br>glucosyltransferase       | AB072919   |
| UGTCs2   | <i>Crocus sativus</i>           | Crocin<br>glucosyltransferase                                | AAP94878   |
| NtSAGT   | <i>Nicotina tabacum</i>         | Salicylic acid<br>glucosyltransferase                        | AAF61647   |
| UGT74B1  | <i>Arabidopsis thaliana</i>     | Thiohydroximate S-<br>glucosyltransferase                    | AC002396   |
| UGT76G1  | <i>Stevia rebaudiana</i>        | Stevioside<br>glucosyltransferase                            | AAR06912   |
| UGT76C1  | <i>Arabidopsis thaliana</i>     | Trans-zeatin N-<br>glucosyltransferase                       | BAB10792   |
| CrUGT7   | <i>Catharanthus roseus</i>      | Glucosyltransferase<br>with broad substrate<br>specificity   | AB733666   |
| ZeaBx8   | <i>Zea mays</i>                 | Benzoxazinoid 2-O-<br>glucosyltransferase                    | AAL57037   |
| UGT85B1  | <i>Sorghum bicolor</i>          | p-<br>Hydroxymandelonitrile<br>O-glucosyltransferase         | AAF17077   |
| CrUGT8   | <i>Catharanthus roseus</i>      | Iridoid 1-O-<br>glucosyltransferase                          | AB733667   |
| LjUGT12  | <i>Lonicera japonica</i>        | Iridoid 1-O-<br>glucosyltransferase                          |            |
| UGT85A1  | <i>Arabidopsis thaliana</i>     | Trans-zeatin O-<br>glucosyltransferase                       | AAF18537   |
| CrUGT6   | <i>Catharanthus roseus</i>      | Iridoid 1-O-<br>glucosyltransferase                          | AB591741   |
| GjUGT2   | <i>Gardenia<br/>jasminoides</i> | Iridoid 1-O-<br>glucosyltransferase                          | AB555732   |
| UGT78D1  | <i>Arabidopsis thaliana</i>     | Flavonol 3-O-glicoside<br>L-<br>rhamnosyltransferase         | AC009917   |
| VvGT1    | <i>Vitis vinifera</i>           | Flavonoid 3-O-<br>glucosyltransferase                        | AAB81682   |
| UGT85A84 | <i>Osmanthus fragrans</i>       | glucosyltransferase                                          | AYN74351.1 |
| UGT85A3  | <i>Arabidopsis thaliana</i>     | UDP-glucosyl<br>transferase                                  | AEE30236.1 |
