# Supplementary material for: Transcriptome Analysis Provides Insights into Catalpol Biosynthesis in the Medicinal Plant Rehmannia glutinosa and the Functional Characterization of RgGES Genes
Source: MDPI journal article supplement (doi:10.3390/genes15020155), 2024-01-24
Supplement: s1 [file s1]

Supplementary Table S1. Primers used in this study.

| Gene Name | Gene number         | Primer No. | Primer name | Sequence               | Function      |
|-----------|---------------------|------------|-------------|------------------------|---------------|
| GES       | Cluster-11149.40193 | Primer 1   | GES-TF      | ATGGTGGAGGCGCAGTGGT    | Real time PCR |
|           |                     | Primer 2   | GES-TR      | GCGGCTGAGAAGAGCTTAGGG  |               |
| G10H      | Cluster-11149.27919 | Primer 3   | G10H-TF     | TGTGGAATATCATGGTGGAG   | Real time PCR |
|           |                     | Primer 4   | G10H-TR     | GTTTCTTTGGTGGCGGTGAG   |               |
| 10HGO     | Cluster-11149.34028 | Primer 5   | 10HGO1-TF   | ACGGTGAAATTCGCTAAGGC   | Real time PCR |
|           |                     | Primer 6   | 10HGO1-TR   | GTGGGATACCAACCAAGATAAG |               |
|           | Cluster-11149.22551 | Primer 7   | 10HGO2-TF   | CCATCTGGCTTTCTTTCC     | Real time PCR |
|           |                     | Primer 8   | 10HGO2-TR   | CCTTGTTGCCTACTTCTGTC   |               |
|           | Cluster-11149.31508 | Primer 9   | 10HGO3-TF   | CAGTTCAGGGAAGACAAAC    | Real time PCR |
|           |                     | Primer 10  | 10HGO3-TR   | ATTCCGACCAAGTAGAGC     |               |
| ISY       | Cluster-11149.20854 | Primer 11  | ISY1-TF     | TCGAGGTGGAATATGAAGAG   | Real time PCR |
|           |                     | Primer 12  | ISY1-TR     | ATCCGCAAACCAGAATGT     |               |
|           | Cluster-11149.27465 | Primer 13  | ISY2-TF     | CGAAATGGACAGCACGAACC   | Real time PCR |
|           |                     | Primer 14  | ISY2-TR     | GCACGGCGAGAACCCGAATA   |               |
| DLS       | Cluster-11149.30874 | Primer 15  | DLS-TF      | CCGAACATTGCCGATTATTT   | Real time PCR |
|           |                     | Primer 16  | DLS-TR      | TCCATCTTTCCCATCACCT    |               |
| DLGT      | Cluster-11149.29597 | Primer 17  | DLGT1-TF    | GCCCCGCCAGGTCCGTGATAT  | Real time PCR |
|           |                     | Primer 18  | DLGT1-TR    | CCAACCGCTGTGCGTGAAA    |               |
|           | Cluster-11149.23607 | Primer 19  | DLGT2-TF    | AGTCCCGCTTCTCCGGTTAC   | Real time PCR |
|           |                     | Primer 20  | DLGT2-TR    | CCTATCGCCGCCTTCACTAA   |               |
| DLH       | Cluster-11149.14301 | Primer 21  | DLH1-TF     | AGAAACGGCCTTGGGAGACT   | Real time PCR |
|           |                     | Primer     | DLH1-       | CGTGACCATTGGCTGCTTTA   |               |

|       |                     |           |          |                                 |               |
|-------|---------------------|-----------|----------|---------------------------------|---------------|
|       |                     | 22        | TR       |                                 |               |
|       | Cluster-11149.10607 | Primer 23 | DLH2-TF  | GAGCAGAGTATTTGCCATCGG           | Real time PCR |
|       |                     | Primer 24 | DLH2-TR  | CCAAACCAGGAGATTAGAAGTG          |               |
| TIP   | -                   | Primer 25 | TIP-TF   | ATGCGGCTGGAAGCAGGAAG            | Real time PCR |
|       |                     | Primer 26 | TIP-TR   | GCCAACGCGACCATATCAA             |               |
| RgGES | Cluster-11149.40193 | Primer 27 | RgGES-FP | CGCGGATCCATGGCTTGTGCAACGAGCAACA | Cloning       |
|       |                     | Primer 28 | RgGES-RP | CGCGTCGACTCAAACAAGGGGAGTGAAGAAG |               |
