# Supplementary material for: Transcriptome Analysis Provides Insights into Catalpol Biosynthesis in the Medicinal Plant Rehmannia glutinosa and the Functional Characterization of RgGES Genes
Source: MDPI journal article supplement (doi:10.3390/genes15020155), 2024-01-24
Supplement: s1 [file s1]

Supplementary Table S2. Transcriptome assembly statistics for *R. glutinosa*.

| Item                    | Number   |
|-------------------------|----------|
| Number of unigenes      | 71142    |
| Average length          | 1131     |
| Median length           | 707      |
| N50                     | 1732     |
| Total size of unigenes  | 80429218 |
| Longest unigene length  | 15639    |
| Shortest unigene length | 301      |
