# Supplementary material for: Transcriptome Analysis Provides Insights into Catalpol Biosynthesis in the Medicinal Plant Rehmannia glutinosa and the Functional Characterization of RgGES Genes
Source: MDPI journal article supplement (doi:10.3390/genes15020155), 2024-01-24
Supplement: s1 [file s1]

Supplementary Table S15. Accession numbers of TPSs used for phylogenetic analysis in Figure 8.

| Species                     | Terpene synthases                               | Accession numbers |
|-----------------------------|-------------------------------------------------|-------------------|
| <i>Abies grandis</i>        | $\gamma$ -humulene synthase                     | AAC05728.1        |
| <i>Arabidopsis thaliana</i> | 1,8-cineole synthase                            | AEE77075.1        |
| <i>Artemisia annua</i>      | 8- <i>epi</i> -cedrol synthase                  | AAF80333.1        |
| <i>Artemisia annua</i>      | $\beta$ -caryophyllene synthase                 | AAL79181.1        |
| <i>Abies grandis</i>        | $\alpha$ -bisabolene synthase                   | AAC24192.1        |
| <i>Oryza sativa</i>         | linalool synthase                               | ACF05530.1        |
| <i>Helianthus annuus</i>    | germacrene A synthase 2                         | ABY49939.1        |
| <i>Helianthus annuus</i>    | cadinene synthase                               | ACA33926.1        |
| <i>Mentha spicata</i>       | limonene synthase                               | AGN90912.1        |
| <i>Nicotiana tabacum</i>    | 5- <i>epi</i> -aristolochene synthase           | AAA19216.1        |
| <i>Oryza sativa</i>         | ent-copalyl diphosphate synthase                | AAT11021.1        |
| <i>Picea sitchensis</i>     | ent-copalyl diphosphate synthase                | ADB55709.1        |
| <i>Populus fremontii</i>    | isoprene synthase                               | AEK70967.1        |
| <i>Picea sitchensis</i>     | pinene synthase                                 | AAP72020.1        |
| <i>Solidago canadensis</i>  | (+)-germacrene D synthase                       | AAR31144.1        |
| <i>Vitis vinifera</i>       | ( <i>E</i> )- $\beta$ -ocimene/myrcene synthase | ADR74206.1        |
| <i>Vitis vinifera</i>       | (+)- $\alpha$ -phellandrene synthase            | ADR74201.1        |
| <i>Arabidopsis thaliana</i> | terpenoid cyclase                               | AEE36246.1        |
| <i>Arabidopsis thaliana</i> | ( <i>S</i> )- (+)-linalool synthase             | Q84UV0.2          |
| <i>Ocimum basilicum</i>     | geraniol synthase                               | AAR11765.1        |
| <i>Catharanthus roseus</i>  | geraniol synthase                               | AFD64744.1        |
