# Supplementary material for: Transcriptome Analysis Provides Insights into Catalpol Biosynthesis in the Medicinal Plant Rehmannia glutinosa and the Functional Characterization of RgGES Genes
Source: MDPI journal article supplement (doi:10.3390/genes15020155), 2024-01-24
Supplement: s1 [file s1]

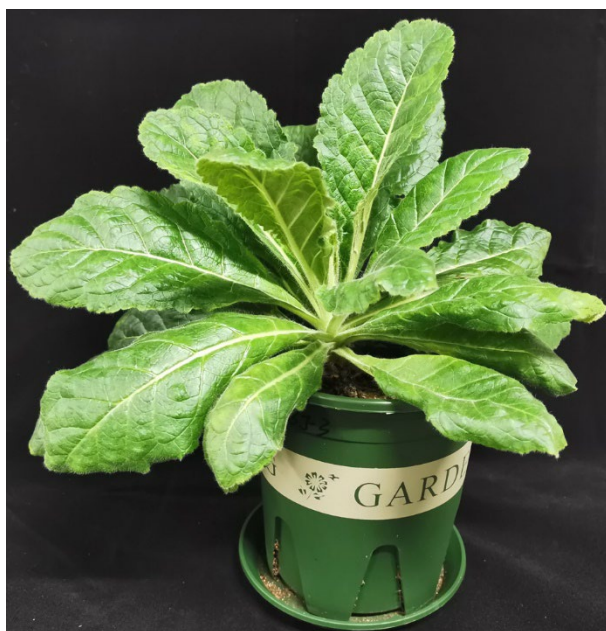

**Supplementary Figure S1.** The *R. glutinosa* plant.

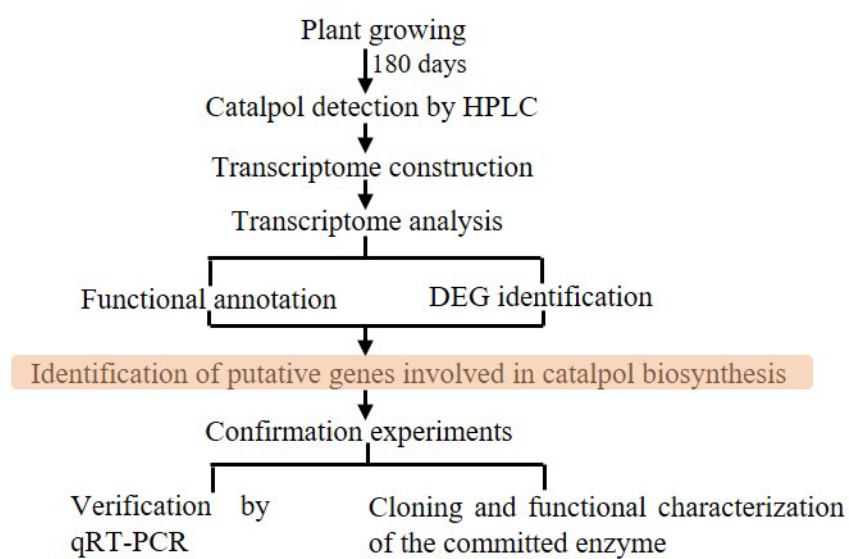

**Supplementary Figure S2.** The flowchart to the Material and Method section for summarizing methodology.

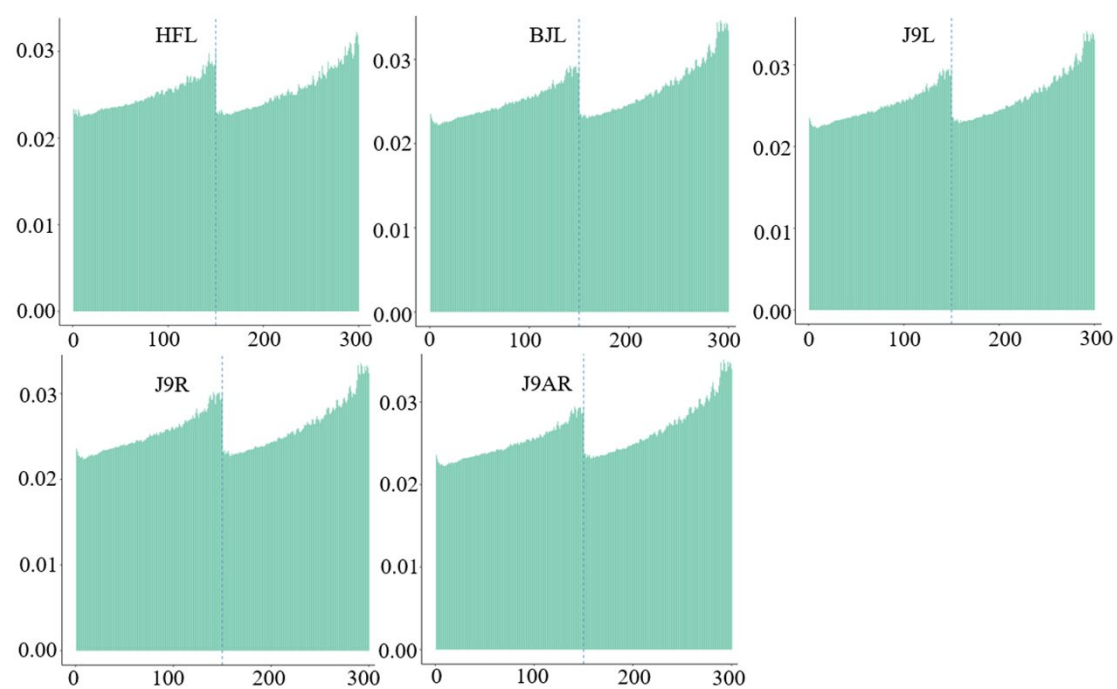

**Supplementary Figure S3.** The error rate distribution of unigenes.

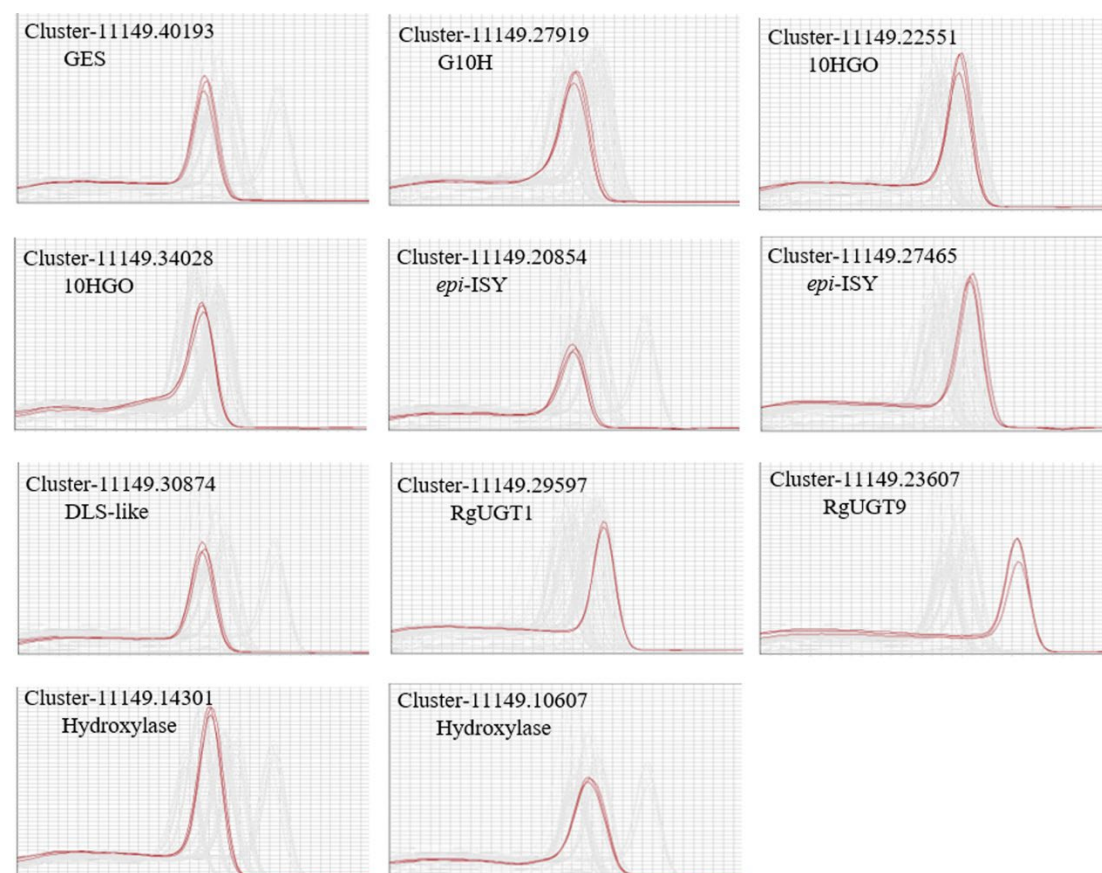

**Supplementary Figure S4.** The melting curves of the genes chosen for qRT-PCR analysis.

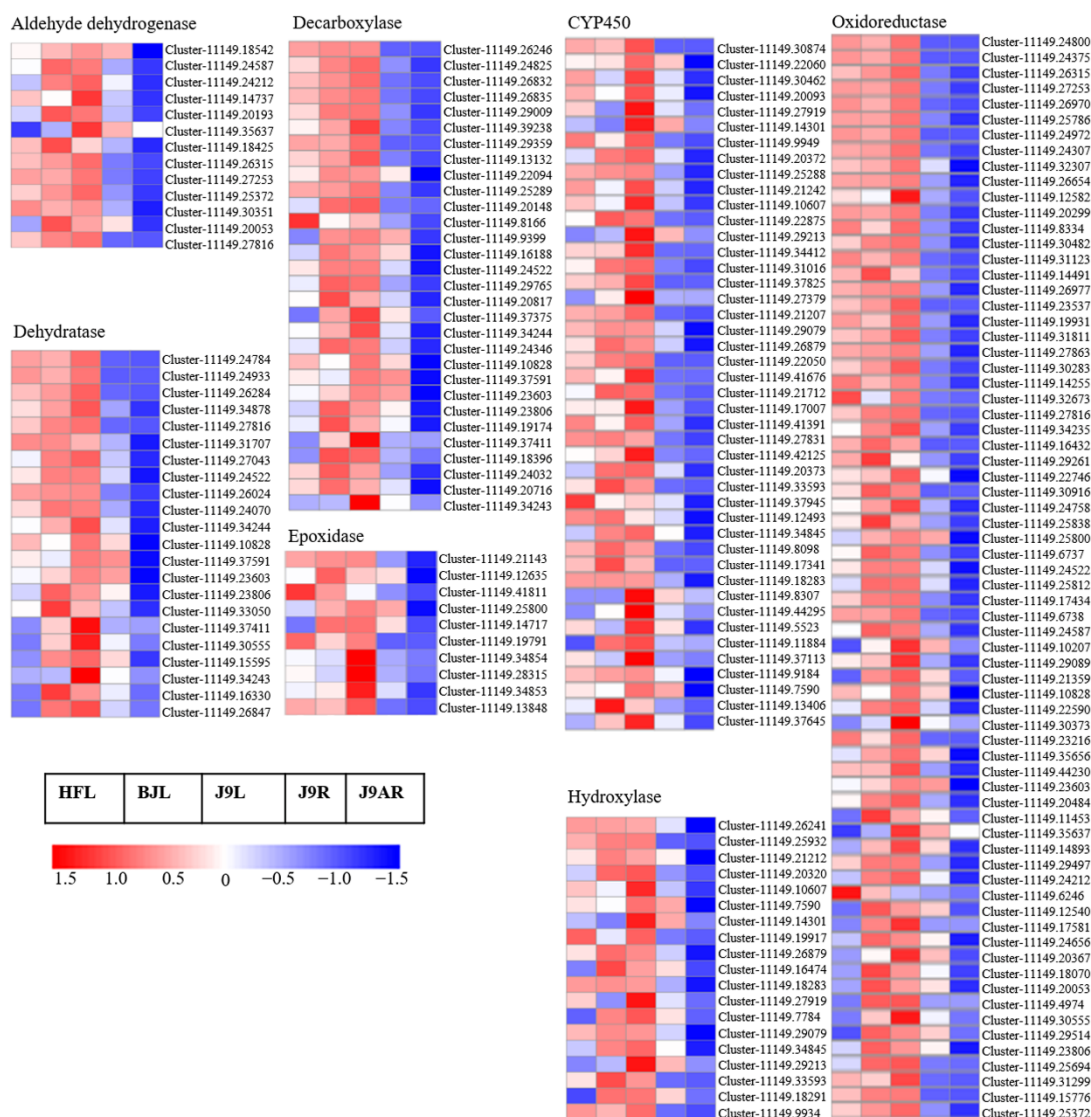

**Supplementary Figure S5.** The heatmap of differentially expressed genes that were evaluated in this study.

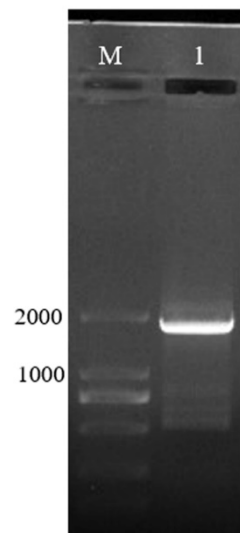

**Supplementary Figure S6.** Agarose gel electrophoresis for PCR products of *RgGES*. M, DNA marker; 1, PCR product of *RgGES*.

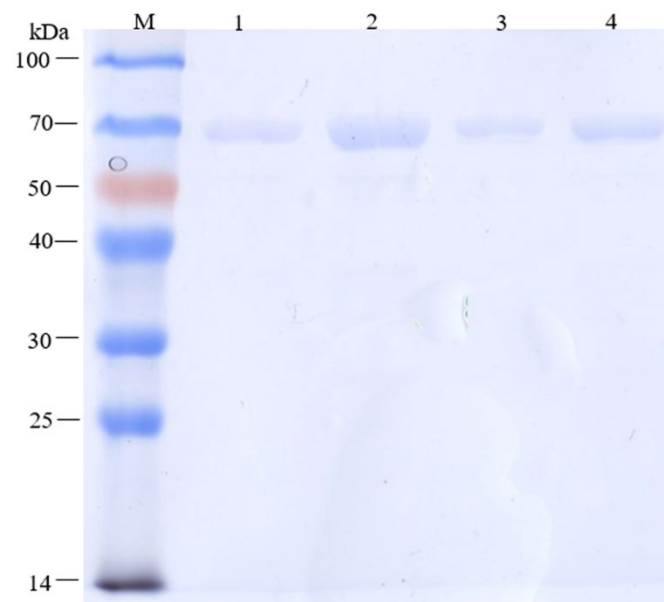

**Supplementary Figure S7.** The SDS-PAGE analysis of the recombinant RgGES1 and RgGES2 protein. M, protein marker; 1-2, the purified RgGES1 protein; 3-4, the purified RgGES2 protein.
