# Supplementary material for: Transcriptome Analysis Provides Insights into Catalpol Biosynthesis in the Medicinal Plant Rehmannia glutinosa and the Functional Characterization of RgGES Genes
Source: Genes (Basel). 2024 Jan 24;15(2):155. doi: 10.3390/genes15020155 (PMC10888080; doi:10.3390/genes15020155)
Supplement: Supplementary file 1 [file genes-15-00155-s001.zip]

Archive with 16 entries (16 files):
- Supplementary Figures.pdf
- Supplementary Table S1.pdf
- Supplementary Table S11.xlsx
- Supplementary Table S12.xlsx
- Supplementary Table S13.xlsx
- Supplementary Table S14.xlsx
- Supplementary Table S15.pdf
- Supplementary Table S2.pdf
- Supplementary Table S3.xlsx
- Supplementary Table S4.xlsx
- Supplementary Table S5.xlsx
- Supplementary Table S6.xlsx
- Supplementary Table S7.xlsx
- Supplementary Table S8.pdf
- Supplementary Table S9.xlsx
- Supplementay Table S10.xlsx
