# Supplementary material for: Transcriptome Analysis Provides Insights into Catalpol Biosynthesis in the Medicinal Plant Rehmannia glutinosa and the Functional Characterization of RgGES Genes
Source: Genes (Basel). 2024 Jan 24;15(2):155. doi: 10.3390/genes15020155 (PMC10888080; doi:10.3390/genes15020155)
Supplement: Supplementary file 1 [file genes-15-00155-s001.zip › Supplementary Table S3.xlsx]

## Sheet: Supplementary Table S3
Supplementary Table S3. Annotation of unigenes in KOG database.
Class	Abbreviation	Gene Numbers	Gene IDs
RNA processing and modification	A	643	Cluster-11149.30935,Cluster-11149.1430,Cluster-11149.13458,Cluster-11149.13455,Cluster-11149.31819,Cluster-11149.25251,Cluster-11149.20061,Cluster-11149.22502,Cluster-11149.22507,Cluster-11149.31705,Cluster-11149.12847,Cluster-11149.18304,Cluster-11149.18759,Cluster-4481.0,Cluster-11149.35487,Cluster-11149.18750,Cluster-11149.27413,Cluster-475.0,Cluster-11149.35508,Cluster-11149.21164,Cluster-111…
Energy production and conversion	C	683	Cluster-11149.1433,Cluster-11149.981,Cluster-11149.24484,Cluster-11149.24221,Cluster-5179.0,Cluster-6739.0,Cluster-11149.15659,Cluster-11149.1432,Cluster-11149.8413,Cluster-11149.40178,Cluster-2136.1,Cluster-11149.38849,Cluster-6299.0,Cluster-11149.21984,Cluster-11149.15249,Cluster-11149.39247,Cluster-196.0,Cluster-11149.28014,Cluster-11149.25893,Cluster-11149.4974,Cluster-11149.47722,Cluster-111…
Chromatin structure and dynamics	B	190	Cluster-11149.48198,Cluster-11149.48197,Cluster-11149.31491,Cluster-11149.22326,Cluster-5627.0,Cluster-11149.22826,Cluster-11149.1777,Cluster-11149.40227,Cluster-11149.18957,Cluster-11149.2907,Cluster-11149.24479,Cluster-11149.24857,Cluster-2157.0,Cluster-11149.25256,Cluster-11149.16977,Cluster-11149.11487,Cluster-11149.13397,Cluster-11149.33724,Cluster-11149.33726,Cluster-11149.33447,Cluster-226…
Amino acid transport and metabolism	E	538	Cluster-11149.25257,Cluster-11149.10890,Cluster-11149.24956,Cluster-11149.34878,Cluster-11149.20831,Cluster-11149.18300,Cluster-11149.18302,Cluster-5286.0,Cluster-2136.1,Cluster-11149.30303,Cluster-11149.23612,Cluster-6033.0,Cluster-4870.0,Cluster-3188.0,Cluster-11149.7773,Cluster-11149.24070,Cluster-11149.10064,Cluster-11149.17149,Cluster-11149.48648,Cluster-11149.27043,Cluster-11149.17595,Clust…
Cell cycle control, cell division, chromosome partitioning	D	307	Cluster-11149.24954,Cluster-11149.31491,Cluster-11149.10687,Cluster-11149.22983,Cluster-11149.23128,Cluster-4412.0,Cluster-11149.11453,Cluster-11149.21550,Cluster-11149.39492,Cluster-11149.24531,Cluster-47.0,Cluster-11149.22582,Cluster-11149.39370,Cluster-11149.48239,Cluster-11149.25013,Cluster-4851.0,Cluster-4764.0,Cluster-11149.19146,Cluster-11149.35154,Cluster-5117.0,Cluster-11149.15791,Cluste…
Carbohydrate transport and metabolism	G	505	Cluster-11149.28348,Cluster-11149.28345,Cluster-11149.2312,Cluster-4354.0,Cluster-11149.47397,Cluster-11149.20060,Cluster-11149.47859,Cluster-11149.20831,Cluster-11149.28084,Cluster-11149.3356,Cluster-11149.34244,Cluster-11149.23612,Cluster-11149.26520,Cluster-11149.21161,Cluster-11149.32970,Cluster-11149.29421,Cluster-11149.24077,Cluster-11149.48897,Cluster-2436.0,Cluster-11149.47523,Cluster-111…
Nucleotide transport and metabolism	F	200	Cluster-11149.25722,Cluster-2093.0,Cluster-11149.45392,Cluster-11149.34743,Cluster-11149.20222,Cluster-11149.17595,Cluster-11149.28430,Cluster-11149.46356,Cluster-11149.34020,Cluster-11149.12042,Cluster-11149.34019,Cluster-307.0,Cluster-11149.20482,Cluster-11149.11416,Cluster-11149.17815,Cluster-654.0,Cluster-2394.0,Cluster-200.0,Cluster-11149.12575,Cluster-6278.0,Cluster-11149.20776,Cluster-1114…
Lipid transport and metabolism	I	505	Cluster-4723.0,Cluster-11149.27281,Cluster-11149.24224,Cluster-11149.27921,Cluster-11149.15656,Cluster-3386.0,Cluster-6790.0,Cluster-6274.0,Cluster-2992.0,Cluster-3997.0,Cluster-11149.34535,Cluster-11149.25412,Cluster-11149.37306,Cluster-2145.0,Cluster-11149.983,Cluster-11149.46651,Cluster-4154.0,Cluster-11149.29604,Cluster-11149.33119,Cluster-11149.24292,Cluster-5820.0,Cluster-11149.423,Cluster-…
Coenzyme transport and metabolism	H	192	Cluster-11149.28697,Cluster-11149.16045,Cluster-11149.28081,Cluster-11149.22322,Cluster-5833.0,Cluster-11149.34743,Cluster-11149.26526,Cluster-11149.26024,Cluster-17027.0,Cluster-11149.28430,Cluster-1338.0,Cluster-11149.33496,Cluster-11149.23180,Cluster-11149.49021,Cluster-1793.0,Cluster-11149.24141,Cluster-6907.0,Cluster-11149.35771,Cluster-11149.26837,Cluster-11149.26835,Cluster-11149.24478,Clu…
Transcription	K	515	Cluster-11149.19413,Cluster-11149.28019,Cluster-11149.9704,Cluster-11149.22509,Cluster-11149.9455,Cluster-11149.43216,Cluster-11149.17488,Cluster-11149.22326,Cluster-11149.35506,Cluster-11149.23124,Cluster-4412.0,Cluster-11149.22821,Cluster-5120.0,Cluster-11149.19650,Cluster-11149.21550,Cluster-168.0,Cluster-11149.31893,Cluster-11149.30765,Cluster-3455.0,Cluster-11149.32290,Cluster-11149.19357,Cl…
Translation, ribosomal structure and biogenesis	J	1150	Cluster-11149.48195,Cluster-11149.28018,Cluster-11149.26143,Cluster-11149.26142,Cluster-5544.0,Cluster-11149.24957,Cluster-11149.24482,Cluster-11149.22501,Cluster-11149.47855,Cluster-4319.0,Cluster-2349.0,Cluster-11149.18305,Cluster-11149.3354,Cluster-11149.23615,Cluster-11149.23619,Cluster-11149.25518,Cluster-540.0,Cluster-11149.820,Cluster-11149.21981,Cluster-6790.0,Cluster-11149.20214,Cluster-…
Cell wall/membrane/envelope biogenesis	M	146	Cluster-1752.0,Cluster-4354.0,Cluster-11149.34244,Cluster-3369.0,Cluster-11149.32970,Cluster-11149.22590,Cluster-11149.21696,Cluster-11149.25810,Cluster-5652.0,Cluster-11149.2416,Cluster-11149.24679,Cluster-3437.0,Cluster-11149.8774,Cluster-11149.22134,Cluster-11149.15411,Cluster-11149.33070,Cluster-11149.20575,Cluster-2121.0,Cluster-360.0,Cluster-4732.0,Cluster-11149.26638,Cluster-11149.47699,Cl…
Replication, recombination and repair	L	294	Cluster-11149.28019,Cluster-11149.28695,Cluster-11149.18284,Cluster-11149.31491,Cluster-11149.13794,Cluster-11149.13795,Cluster-11149.17525,Cluster-11149.34530,Cluster-11149.48866,Cluster-11149.22047,Cluster-11149.11457,Cluster-1962.0,Cluster-5120.0,Cluster-11149.21550,Cluster-11149.29322,Cluster-11149.31893,Cluster-11149.30765,Cluster-11149.32290,Cluster-11149.25115,Cluster-11149.15043,Cluster-1…
Posttranslational modification, protein turnover, chaperones	O	1367	Cluster-4187.0,Cluster-11149.30931,Cluster-11149.23425,Cluster-11149.23424,Cluster-11149.2314,Cluster-4354.0,Cluster-11149.21828,Cluster-11149.39092,Cluster-11149.24953,Cluster-11149.27286,Cluster-6109.0,Cluster-1211.0,Cluster-3203.0,Cluster-11149.19482,Cluster-11149.31183,Cluster-11149.47850,Cluster-11149.2153,Cluster-11149.28085,Cluster-11149.29618,Cluster-11149.48100,Cluster-2774.0,Cluster-111…
Cell motility	N	6	Cluster-11149.25818,Cluster-6525.0,Cluster-11149.23306,Cluster-11149.27121,Cluster-11149.35642,Cluster-11149.30749
Secondary metabolites biosynthesis, transport and catabolism	Q	192	Cluster-11149.30933,Cluster-11149.21820,Cluster-11149.980,Cluster-6745.0,Cluster-2441.0,Cluster-11149.34942,Cluster-1090.0,Cluster-11149.44932,Cluster-11149.19896,Cluster-11149.26329,Cluster-11149.26648,Cluster-11149.23236,Cluster-11149.27755,Cluster-11149.24147,Cluster-3911.0,Cluster-11149.955,Cluster-11149.47642,Cluster-11149.25917,Cluster-11149.41655,Cluster-3022.0,Cluster-11149.32182,Cluster-…
Inorganic ion transport and metabolism	P	260	Cluster-2093.0,Cluster-11149.980,Cluster-11149.988,Cluster-6871.0,Cluster-11149.10133,Cluster-11149.48148,Cluster-11149.28017,Cluster-11149.12439,Cluster-11149.26027,Cluster-11149.27419,Cluster-11149.32726,Cluster-11149.23238,Cluster-11149.47954,Cluster-2828.0,Cluster-11149.27151,Cluster-11149.17810,Cluster-20198.0,Cluster-4820.0,Cluster-11149.25936,Cluster-11149.47646,Cluster-11149.34405,Cluster…
Function unknown	S	545	Cluster-2263.0,Cluster-2263.1,Cluster-11149.48196,Cluster-11149.28694,Cluster-11149.33419,Cluster-11149.27929,Cluster-11149.36829,Cluster-11149.30936,Cluster-11149.24225,Cluster-11149.18821,Cluster-11149.16682,Cluster-4510.0,Cluster-11149.13797,Cluster-11149.43560,Cluster-11149.20217,Cluster-11149.18859,Cluster-11149.16537,Cluster-11149.31289,Cluster-11149.24079,Cluster-3602.0,Cluster-11149.16433…
General function prediction only	R	1232	Cluster-1899.0,Cluster-924.0,Cluster-11149.31325,Cluster-11149.2314,Cluster-11149.11141,Cluster-11149.24953,Cluster-11149.24958,Cluster-11149.325,Cluster-11149.324,Cluster-11149.328,Cluster-11149.20390,Cluster-11149.10232,Cluster-11149.27922,Cluster-11149.29492,Cluster-11149.26572,Cluster-11149.26577,Cluster-11149.15207,Cluster-11149.30304,Cluster-5387.0,Cluster-11149.40447,Cluster-3367.0,Cluster…
Intracellular trafficking, secretion, and vesicular transport	U	730	Cluster-11149.34968,Cluster-11149.17663,Cluster-5603.0,Cluster-11149.31812,Cluster-11149.48484,Cluster-11149.11145,Cluster-1830.1,Cluster-1830.0,Cluster-11149.20397,Cluster-4750.1,Cluster-4750.0,Cluster-11149.5903,Cluster-11149.34355,Cluster-11149.21407,Cluster-11149.25511,Cluster-11149.30332,Cluster-11149.20212,Cluster-11149.43828,Cluster-11149.27652,Cluster-3724.0,Cluster-1857.0,Cluster-11149.2…
Signal transduction mechanisms	T	688	Cluster-1728.0,Cluster-11149.32405,Cluster-11149.21829,Cluster-11149.26140,Cluster-11149.26573,Cluster-4782.0,Cluster-11149.3684,Cluster-11149.31491,Cluster-11149.24735,Cluster-3369.0,Cluster-11149.17484,Cluster-11149.42617,Cluster-6790.0,Cluster-11149.20212,Cluster-6244.0,Cluster-11149.43828,Cluster-4412.0,Cluster-11149.44394,Cluster-11149.30536,Cluster-5323.0,Cluster-11149.22046,Cluster-11149.3…
Extracellular structures	W	15	Cluster-11149.33070,Cluster-11149.28822,Cluster-3943.0,Cluster-11149.2831,Cluster-11149.9590,Cluster-11149.22331,Cluster-5202.0,Cluster-18618.0,Cluster-10968.0,Cluster-11149.16455,Cluster-11149.27686,Cluster-4498.0,Cluster-11149.15213,Cluster-11149.14434,Cluster-1040.0
Defense mechanisms	V	45	Cluster-6487.1,Cluster-11149.22503,Cluster-11149.26572,Cluster-10992.0,Cluster-11149.29831,Cluster-11149.29509,Cluster-11149.30336,Cluster-11149.26944,Cluster-5976.0,Cluster-5270.0,Cluster-11149.48845,Cluster-11149.26786,Cluster-11149.12920,Cluster-11149.47583,Cluster-6845.0,Cluster-11149.35834,Cluster-11149.28550,Cluster-11149.9104,Cluster-11149.7013,Cluster-11149.27667,Cluster-11149.2013,Cluste…
Nuclear structure	Y	59	Cluster-912.0,Cluster-11149.34193,Cluster-11149.27911,Cluster-11149.20774,Cluster-11149.28133,Cluster-11149.22113,Cluster-11149.43810,Cluster-11149.26258,Cluster-11149.22921,Cluster-1735.0,Cluster-11149.30550,Cluster-11149.34628,Cluster-11149.25400,Cluster-6039.0,Cluster-11149.47478,Cluster-4244.0,Cluster-11149.44177,Cluster-11149.45103,Cluster-11149.15660,Cluster-11149.48507,Cluster-1363.0,Clust…
Cytoskeleton	Z	285	Cluster-2539.0,Cluster-1319.0,Cluster-5034.0,Cluster-4750.1,Cluster-4750.0,Cluster-1941.0,Cluster-11149.6665,Cluster-11149.22983,Cluster-5015.0,Cluster-11149.11453,Cluster-11149.19513,Cluster-11149.24531,Cluster-11149.33490,Cluster-11149.13710,Cluster-11149.25013,Cluster-5448.0,Cluster-11149.47953,Cluster-11149.18518,Cluster-817.0,Cluster-4625.0,Cluster-11149.19149,Cluster-11149.23923,Cluster-111…
