# Supplementary material for: Transcriptome Analysis Provides Insights into Catalpol Biosynthesis in the Medicinal Plant Rehmannia glutinosa and the Functional Characterization of RgGES Genes
Source: Genes (Basel). 2024 Jan 24;15(2):155. doi: 10.3390/genes15020155 (PMC10888080; doi:10.3390/genes15020155)
Supplement: Supplementary file 1 [file genes-15-00155-s001.zip › Supplementary Table S4.xlsx]

## Sheet: Supplementary Table S4
Supplementary Table S4. KEGG classification of all the unigenes.
KO_Pathway_Level1	KO_Pathway_Level2	Gene_Number
Cellular Processes	Cell growth and death	465
Cellular Processes	Cell motility	130
Cellular Processes	Cellular community - eukaryotes	197
Cellular Processes	Cellular community - prokaryotes	107
Cellular Processes	Transport and catabolism	954
Environmental Information Processing	Membrane transport	110
Environmental Information Processing	Signal transduction	1757
Environmental Information Processing	Signaling molecules and interaction	2
Genetic Information Processing	Folding, sorting and degradation	879
Genetic Information Processing	Replication and repair	241
Genetic Information Processing	Transcription	462
Genetic Information Processing	Translation	1340
Metabolism	Amino acid metabolism	807
Metabolism	Biosynthesis of other secondary metabolites	394
Metabolism	Carbohydrate metabolism	1350
Metabolism	Energy metabolism	814
Metabolism	Global and overview maps	889
Metabolism	Glycan biosynthesis and metabolism	219
Metabolism	Lipid metabolism	681
Metabolism	Metabolism of cofactors and vitamins	461
Metabolism	Metabolism of other amino acids	373
Metabolism	Metabolism of terpenoids and polyketides	308
Metabolism	Nucleotide metabolism	308
Metabolism	Xenobiotics biodegradation and metabolism	159
Organismal Systems	Aging	241
Organismal Systems	Circulatory system	144
Organismal Systems	Development	73
Organismal Systems	Digestive system	228
Organismal Systems	Endocrine system	608
Organismal Systems	Environmental adaptation	384
Organismal Systems	Excretory system	129
Organismal Systems	Immune system	600
Organismal Systems	Nervous system	638
Organismal Systems	Sensory system	62
