# Supplementary material for: Transcriptome Analysis Provides Insights into Catalpol Biosynthesis in the Medicinal Plant Rehmannia glutinosa and the Functional Characterization of RgGES Genes
Source: Genes (Basel). 2024 Jan 24;15(2):155. doi: 10.3390/genes15020155 (PMC10888080; doi:10.3390/genes15020155)
Supplement: Supplementary file 1 [file genes-15-00155-s001.zip › Supplementary Table S5.xlsx]

## Sheet: Sheet1
Supplementary Table S5. Summary of annotated unigenes in GO database.
GO term （lev2)	GO term （lev1)	Gene number
transcription regulator activity	Molecular Function	1097
cargo receptor activity	Molecular Function	16
molecular carrier activity	Molecular Function	30
molecular transducer activity	Molecular Function	204
transporter activity	Molecular Function	2179
translation regulator activity	Molecular Function	152
structural molecule activity	Molecular Function	953
catalytic activity	Molecular Function	12988
small molecule sensor activity	Molecular Function	76
molecular function regulator	Molecular Function	998
binding	Molecular Function	15155
antioxidant activity	Molecular Function	140	33988
immune system process	Biological Process	221
locomotion	Biological Process	190
cellular process	Biological Process	16395
biological regulation	Biological Process	5590
pigmentation	Biological Process	1
behavior	Biological Process	24
metabolic process	Biological Process	15485
reproductive process	Biological Process	370
intraspecies interaction between organisms	Biological Process	23
nitrogen utilization	Biological Process	2
positive regulation of biological process	Biological Process	261
regulation of biological process	Biological Process	5155
rhythmic process	Biological Process	19
growth	Biological Process	24
multi-organism process	Biological Process	464
biological adhesion	Biological Process	203
detoxification	Biological Process	23
interspecies interaction between organisms	Biological Process	1518
developmental process	Biological Process	521
biomineralization	Biological Process	3
response to stimulus	Biological Process	3189
localization	Biological Process	4455
negative regulation of biological process	Biological Process	370
multicellular organismal process	Biological Process	671
signaling	Biological Process	1660
reproduction	Biological Process	397	57234
virion part	Cellular Component	593
intracellular	Cellular Component	6628
protein-containing complex	Cellular Component	4927
virion	Cellular Component	593
cellular anatomical entity	Cellular Component	11537	24278
