# Supplementary material for: Transcriptome Analysis Provides Insights into Catalpol Biosynthesis in the Medicinal Plant Rehmannia glutinosa and the Functional Characterization of RgGES Genes
Source: Genes (Basel). 2024 Jan 24;15(2):155. doi: 10.3390/genes15020155 (PMC10888080; doi:10.3390/genes15020155)
Supplement: Supplementary file 1 [file genes-15-00155-s001.zip › Supplementary Table S6.xlsx]

## Sheet: Sheet1
Supplementary Table S6. Candidate unigenes of common enzymes in route I and route II. The unigenes which met the screening criteria were marked with red color. Using the genes from Catharanthus roseus to conduct a tBLASTn searching in R. glutinosa transcriptomes, their respective highest hits were highlighted in yellow color.
geraniol synthase （GES）
gene_id	fpkm(HFL)	fpkm(BJL)	fpkm(J9L)	fpkm(J9R)	fpkm(J9AR)	Gene Length	NR GI	NR ID	NR Score	NR Evalue	NR Description	NT GI	NT ID	NT Score	NT Evalue	NT Description	KO ID	KO Name	KO Description	Http Link	Swissprot ID	Swissprot Score	Swissprot Evalue	Swissprot Description	PFAM ID	PFAM description	Gene Ontology Biological Pathway	BP Description	Gene Ontology Molecular Function	MF Description	Gene Ontology Cellular Component	CC Description	KOG ID	KOG Description	UP_DOWN_REGULATION(BJ_LvsJ9_R)	log2FC(BJ_LvsJ9_R)	q value(BJ_LvsJ9_R)	UP_DOWN_REGULATION(J9_RvsJ9_X)	log2FC(J9_RvsJ9_X)	q value(J9_RvsJ9_X)	UP_DOWN_REGULATION(BJ_LvsJ9_X)	log2FC(BJ_LvsJ9_X)	q value(BJ_LvsJ9_X)	UP_DOWN_REGULATION(HF_LvsJ9_R)	log2FC(HF_LvsJ9_R)	q value(HF_LvsJ9_R)	UP_DOWN_REGULATION(HF_LvsJ9_X)	log2FC(HF_LvsJ9_X)	q value(HF_LvsJ9_X)
Cluster-11149.40193	14.36	2.65	73.7	2.42	1.4	2458	747067797	XP_011080637.1	1849	7e-204	geraniol synthase, chloroplastic [Sesamum indicum]	XM_011082335.2	XM_011082335	646	0	PREDICTED: Sesamum indicum geraniol synthase, chloroplastic (LOC105163844), mRNA	K20979	GES	geranyl diphosphate diphosphatase	http://www.genome.jp/dbget-bin/www_bget?ko:K20979	Q6USK1	1503	3.5e-165	Geraniol synthase, chloroplastic OS=Ocimum basilicum OX=39350 GN=GES PE=1 SV=1	PF03936//PF01397	Terpene synthase family, metal binding domain//Terpene synthase, N-terminal domain	--	--	GO:0000287//GO:0016829//GO:0010333	magnesium ion binding//lyase activity//terpene synthase activity	--	--	--	--	FALSE	0.330191	0.835728	FALSE	0.393601	0.727027	FALSE	0.61305	0.355239	UP	3.23978	1.02e-10	UP	3.58299	1.7e-12
geraniol 10-hydroxylase （G10H)
gene_id	fpkm(HFL)	fpkm(BJL)	fpkm(J9L)	fpkm(J9R)	fpkm(J9AR)	Gene Length	NR GI	NR ID	NR Score	NR Evalue	NR Description	NT GI	NT ID	NT Score	NT Evalue	NT Description	KO ID	KO Name	KO Description	Http Link	Swissprot ID	Swissprot Score	Swissprot Evalue	Swissprot Description	PFAM ID	PFAM description	Gene Ontology Biological Pathway	BP Description	Gene Ontology Molecular Function	MF Description	Gene Ontology Cellular Component	CC Description	KOG ID	KOG Description	UP_DOWN_REGULATION(BJ_LvsJ9_R)	log2FC(BJ_LvsJ9_R)	q value(BJ_LvsJ9_R)	UP_DOWN_REGULATION(J9_RvsJ9_X)	log2FC(J9_RvsJ9_X)	q value(J9_RvsJ9_X)	UP_DOWN_REGULATION(BJ_LvsJ9_X)	log2FC(BJ_LvsJ9_X)	q value(BJ_LvsJ9_X)	UP_DOWN_REGULATION(HF_LvsJ9_R)	log2FC(HF_LvsJ9_R)	q value(HF_LvsJ9_R)	UP_DOWN_REGULATION(HF_LvsJ9_X)	log2FC(HF_LvsJ9_X)	q value(HF_LvsJ9_X)
Cluster-11149.44041	0.33	0.2	0.23	10.42	56.3	1780	747044430	XP_011089001.1	1359	3.4e-147	geraniol 8-hydroxylase-like [Sesamum indicum]	--	--	--	--	--	-	-	-	http://www.genome.jp/dbget-bin/www_bget?ko:-	W8JMV1	1268	4.6e-138	Cytochrome P450 76T24 OS=Catharanthus roseus OX=4058 GN=CYP76T24 PE=2 SV=1	PF00067	Cytochrome P450	GO:0055114	oxidation-reduction process	GO:0005506//GO:0020037//GO:0016705	iron ion binding//heme binding//oxidoreductase activity, acting on paired donors, with incorporation or reduction of molecular oxygen	--	--	--	--	DOWN	-5.46827	1.96e-17	DOWN	-2.82916	5.92e-09	DOWN	-8.40357	6.88e-37	DOWN	-4.28707	1.18e-12	DOWN	-7.16384	1.66e-31
Cluster-11149.45030	0.28	0.13	0.03	15.71	34.6	1920	1173798717	XP_011081376.2	2054	9.3e-228	geraniol 8-hydroxylase-like [Sesamum indicum]	--	--	--	--	--	-	-	-	http://www.genome.jp/dbget-bin/www_bget?ko:-	A0A068Q5V6	838	3.6e-88	Cytochrome P450 71AU50 OS=Prunus mume OX=102107 GN=CYP71AU50 PE=2 SV=1	PF00067	Cytochrome P450	GO:0055114	oxidation-reduction process	GO:0020037//GO:0005506//GO:0016705	heme binding//iron ion binding//oxidoreductase activity, acting on paired donors, with incorporation or reduction of molecular oxygen	--	--	--	--	DOWN	-6.66268	3.33e-23	DOWN	-1.53554	0.00259281	DOWN	-8.30251	2.98e-34	DOWN	-5.1297	2.73e-17	DOWN	-6.71265	5.69e-28
Cluster-11149.2519	1.4	2.07	0.58	2.72	11.69	1616	1276261446	PIN18284.1	1853	1.6e-204	Cytochrome P450 CYP2 subfamily [Handroanthus impetiginosus]	XM_011072929.1	XM_011072929	528	0	PREDICTED: Sesamum indicum 7-ethoxycoumarin O-deethylase-like (LOC105156707), mRNA	-	-	-	http://www.genome.jp/dbget-bin/www_bget?ko:-	Q8VWZ7	1019	3.1e-109	geraniol 8-hydroxylase OS=Catharanthus roseus OX=4058 GN=CYP76B6 PE=1 SV=1	PF00067	Cytochrome P450	GO:0055114	oxidation-reduction process	GO:0016705//GO:0020037//GO:0005506	oxidoreductase activity, acting on paired donors, with incorporation or reduction of molecular oxygen//heme binding//iron ion binding	--	--	--	--	FALSE	-0.191153	1	DOWN	-2.49864	1.17e-06	DOWN	-2.80019	3.68e-08	FALSE	-0.287737	0.876549	DOWN	-2.83567	5.72e-08
Cluster-11149.5306	1.07	0.88	2.54	22.69	7.8	1992	747108163	XP_011069393.1	997	3.6e-105	geraniol 8-hydroxylase-like [Sesamum indicum]	--	--	--	--	--	-	-	-	http://www.genome.jp/dbget-bin/www_bget?ko:-	A0A4D6Q414	494	2.9e-48	Flavonoid 3',5'-hydroxylase CYP75B138 OS=Crocosmia x crocosmiiflora OX=1053288 GN=CYP75B138 PE=1 SV=1	PF00067	Cytochrome P450	GO:0055114	oxidation-reduction process	GO:0016705//GO:0005506//GO:0020037	oxidoreductase activity, acting on paired donors, with incorporation or reduction of molecular oxygen//iron ion binding//heme binding	--	--	--	--	DOWN	-4.47425	1.17e-16	FALSE	1.14321	0.0373203	DOWN	-3.44091	9.29e-11	DOWN	-3.73028	1.43e-12	DOWN	-2.63653	5.55e-07
Cluster-11149.45594	0.12	0.19	0.96	0.37	0.5	935	747068720	XP_011081129.1	1192	4.1e-128	cytochrome P450 93A3-like [Sesamum indicum]	XM_012990236.1	XM_012990236	244	2.46e-122	PREDICTED: Erythranthe guttatus geraniol 8-hydroxylase-like (LOC105965668), mRNA	-	-	-	http://www.genome.jp/dbget-bin/www_bget?ko:-	Q42798	619	4.3e-63	3,9-dihydroxypterocarpan 6A-monooxygenase OS=Glycine max OX=3847 GN=CYP93A1 PE=1 SV=1	PF00067	Cytochrome P450	GO:0055114	oxidation-reduction process	GO:0020037//GO:0005506//GO:0016705	heme binding//iron ion binding//oxidoreductase activity, acting on paired donors, with incorporation or reduction of molecular oxygen	--	--	--	--	FALSE	-0.7149	0.869797	FALSE	-0.824764	0.794971	FALSE	-1.64255	0.353272	FALSE	-0.874505	1	FALSE	-1.73787	0.28393
Cluster-11149.36431	4.18	5.38	4.6	11.07	8.3	4968	1276261447	PIN18285.1	2868	0	hypothetical protein CDL12_09044 [Handroanthus impetiginosus]	XM_011072828.1	XM_011072828	978	0	PREDICTED: Sesamum indicum uncharacterized LOC105156622 (LOC105156622), transcript variant X5, mRNA	-	-	-	http://www.genome.jp/dbget-bin/www_bget?ko:-	D1MI46	617	3.9e-62	geraniol 8-hydroxylase OS=Swertia mussotii OX=137888 GN=CYP76B10 PE=1 SV=1	PF00067	Cytochrome P450	GO:0055114	oxidation-reduction process	GO:0016705//GO:0020037//GO:0005506	oxidoreductase activity, acting on paired donors, with incorporation or reduction of molecular oxygen//heme binding//iron ion binding	--	--	--	--	FALSE	-0.842164	0.169851	FALSE	0.0201666	1	FALSE	-0.932742	0.0730837	FALSE	-0.729443	0.252837	FALSE	-0.759254	0.169928
Cluster-11149.46690	0	0	0	3.74	2.17	408	848920114	XP_012857009.1	215	3.5e-15	PREDICTED: geraniol 8-hydroxylase-like [Erythranthe guttata]	--	--	--	--	--	-	-	-	http://www.genome.jp/dbget-bin/www_bget?ko:-	--	--	--	--	PF00067	Cytochrome P450	GO:0055114	oxidation-reduction process	GO:0016705//GO:0020037//GO:0005506	oxidoreductase activity, acting on paired donors, with incorporation or reduction of molecular oxygen//heme binding//iron ion binding	--	--	--	--	FALSE	-6.69541	0.00700451	FALSE	0.378274	0.976518	FALSE	-6.16242	0.0233754	FALSE	-6.5231	0.00968287	FALSE	-5.92525	0.0393902
Cluster-11149.44741	0.55	0.42	1.24	18.94	20.58	2462	1278993852	XP_022851176.1	785	1.7e-80	geraniol 8-hydroxylase-like [Olea europaea var. sylvestris]	--	--	--	--	--	-	-	-	http://www.genome.jp/dbget-bin/www_bget?ko:-	Q8VWZ7	600	1.8e-60	geraniol 8-hydroxylase OS=Catharanthus roseus OX=4058 GN=CYP76B6 PE=1 SV=1	PF00067	Cytochrome P450	GO:0055114	oxidation-reduction process	GO:0016705//GO:0005506//GO:0020037	oxidoreductase activity, acting on paired donors, with incorporation or reduction of molecular oxygen//iron ion binding//heme binding	--	--	--	--	DOWN	-5.29329	1.56e-20	FALSE	-0.515943	0.485866	DOWN	-5.91846	1.03e-24	DOWN	-4.41529	6.76e-16	DOWN	-4.98027	1.22e-19
Cluster-11149.46030	0	0.41	0	10.41	28.73	350	1173798717	XP_011081376.2	254	8.9e-20	geraniol 8-hydroxylase-like [Sesamum indicum]	--	--	--	--	--	-	-	-	http://www.genome.jp/dbget-bin/www_bget?ko:-	W8JMU7	137	1.2e-07	Cytochrome P450 81Q32 OS=Catharanthus roseus OX=4058 GN=CYP81Q32 PE=2 SV=1	PF00067	Cytochrome P450	GO:0055114	oxidation-reduction process	GO:0005506//GO:0020037//GO:0016705	iron ion binding//heme binding//oxidoreductase activity, acting on paired donors, with incorporation or reduction of molecular oxygen	--	--	--	--	DOWN	-4.23257	0.000800264	DOWN	-1.86227	0.00436081	DOWN	-6.1765	3.42e-10	DOWN	-7.35268	0.000331033	DOWN	-8.99161	2.65e-10
Cluster-11149.41135	0.4	1.55	0.74	0	1.59	357	604303770	EYU23179.1	519	1.7e-50	hypothetical protein MIMGU_mgv1a019215mg, partial [Erythranthe guttata]	XM_020696296.1	XM_020696296	143	1.24e-66	PREDICTED: Sesamum indicum geraniol 8-hydroxylase-like (LOC105156305), mRNA	-	-	-	http://www.genome.jp/dbget-bin/www_bget?ko:-	O64636	360	1.8e-33	Cytochrome P450 76C1 OS=Arabidopsis thaliana OX=3702 GN=CYP76C1 PE=2 SV=1	PF00067	Cytochrome P450	GO:0055114	oxidation-reduction process	GO:0020037//GO:0005506//GO:0016705	heme binding//iron ion binding//oxidoreductase activity, acting on paired donors, with incorporation or reduction of molecular oxygen	--	--	--	--	FALSE	5.17838	0.380656	FALSE	-5.26588	0.357601	FALSE	-0.263319	1	FALSE	3.51164	1	FALSE	-1.68433	0.618116
Cluster-11149.27919	56.97	22.88	166.75	37.18	18.8	1955	747102147	XP_011099226.1	1200	1e-128	geraniol 8-hydroxylase-like [Sesamum indicum]	XM_011100924.2	XM_011100924	426	0	PREDICTED: Sesamum indicum geraniol 8-hydroxylase-like (LOC105177688), mRNA	-	-	-	http://www.genome.jp/dbget-bin/www_bget?ko:-	Q8VWZ7	1085	8.3e-117	geraniol 8-hydroxylase OS=Catharanthus roseus OX=4058 GN=CYP76B6 PE=1 SV=1	PF00067	Cytochrome P450	GO:0055114	oxidation-reduction process	GO:0016705//GO:0005506//GO:0020037	oxidoreductase activity, acting on paired donors, with incorporation or reduction of molecular oxygen//iron ion binding//heme binding	--	--	--	--	FALSE	-0.498502	0.550344	FALSE	0.587815	0.387654	FALSE	-0.0214528	1	FALSE	1.28983	0.0136764	UP	1.82761	0.000131961
Cluster-11149.42846	2.89	0.27	0.05	9.93	21.87	1060	1173765647	XP_020551955.1	724	8.6e-74	geraniol 8-hydroxylase-like [Sesamum indicum]	--	--	--	--	--	-	-	-	http://www.genome.jp/dbget-bin/www_bget?ko:-	O64637	504	1.1e-49	Cytochrome P450 76C2 OS=Arabidopsis thaliana OX=3702 GN=CYP76C2 PE=2 SV=1	PF00067	Cytochrome P450	GO:0055114	oxidation-reduction process	GO:0005506//GO:0020037//GO:0016705	iron ion binding//heme binding//oxidoreductase activity, acting on paired donors, with incorporation or reduction of molecular oxygen	--	--	--	--	DOWN	-4.95264	1.25e-12	DOWN	-1.53707	0.00357867	DOWN	-6.59406	1.19e-22	FALSE	-1.10786	0.0902659	DOWN	-2.69443	1.75e-07
Cluster-11149.4444	0.04	0.28	0.22	8.94	6.24	1862	848910144	XP_012853741.1	1490	2.3e-162	PREDICTED: 7-ethoxycoumarin O-deethylase-like [Erythranthe guttata]	XM_011071426.2	XM_011071426	358	0	PREDICTED: Sesamum indicum geraniol 8-hydroxylase-like (LOC105155529), mRNA	-	-	-	http://www.genome.jp/dbget-bin/www_bget?ko:-	O64637	750	5.5e-78	Cytochrome P450 76C2 OS=Arabidopsis thaliana OX=3702 GN=CYP76C2 PE=2 SV=1	PF02128//PF00067	Fungalysin metallopeptidase (M36)//Cytochrome P450	GO:0055114	oxidation-reduction process	GO:0005506//GO:0020037//GO:0008270//GO:0004222//GO:0016705	iron ion binding//heme binding//zinc ion binding//metalloendopeptidase activity//oxidoreductase activity, acting on paired donors, with incorporation or reduction of molecular oxygen	GO:0005615	extracellular space	--	--	DOWN	-4.77067	9.69e-15	FALSE	0.121273	1	DOWN	-4.75705	1.13e-14	DOWN	-7.03573	1.96e-18	DOWN	-6.94691	1.16e-17
Cluster-11149.3958	0.24	0.43	0.25	3.21	33.7	962	1276261446	PIN18284.1	925	3.8e-97	Cytochrome P450 CYP2 subfamily [Handroanthus impetiginosus]	--	--	--	--	--	-	-	-	http://www.genome.jp/dbget-bin/www_bget?ko:-	D1MI46	423	2.4e-40	geraniol 8-hydroxylase OS=Swertia mussotii OX=137888 GN=CYP76B10 PE=1 SV=1	PF00067	Cytochrome P450	GO:0055114	oxidation-reduction process	GO:0005506//GO:0020037//GO:0016705	iron ion binding//heme binding//oxidoreductase activity, acting on paired donors, with incorporation or reduction of molecular oxygen	--	--	--	--	DOWN	-2.66404	0.000724176	DOWN	-3.78575	7.64e-13	DOWN	-6.55609	3.43e-24	DOWN	-3.04546	0.00051141	DOWN	-6.87396	3.39e-23
Cluster-11149.9480	1.44	0	0	8.21	17.08	844	1173765647	XP_020551955.1	517	6.9e-50	geraniol 8-hydroxylase-like [Sesamum indicum]	--	--	--	--	--	-	-	-	http://www.genome.jp/dbget-bin/www_bget?ko:-	P98183	219	9.4e-17	Tabersonine 16-hydroxylase 1 OS=Catharanthus roseus OX=4058 GN=CYP71D12 PE=1 SV=2	PF03592//PF00067	Terminase small subunit//Cytochrome P450	GO:0055114//GO:0006323	oxidation-reduction process//DNA packaging	GO:0016705//GO:0020037//GO:0005506	oxidoreductase activity, acting on paired donors, with incorporation or reduction of molecular oxygen//heme binding//iron ion binding	--	--	--	--	DOWN	-9.72127	1.33e-13	FALSE	-1.45453	0.00926086	DOWN	-11.0194	1.94e-21	DOWN	-1.83929	0.00430845	DOWN	-3.34243	3.73e-09
Cluster-11149.45029	0.81	0.25	0	10.54	40.93	1305	1173798717	XP_011081376.2	1829	7.8e-202	geraniol 8-hydroxylase-like [Sesamum indicum]	XM_011083075.2	XM_011083075	532	0	PREDICTED: Sesamum indicum cytochrome P450 76C1-like (LOC105164423), mRNA	-	-	-	http://www.genome.jp/dbget-bin/www_bget?ko:-	A0A4D6Q415	739	7.3e-77	Flavonoid 3'-monooxygenase CYP75B137 OS=Crocosmia x crocosmiiflora OX=1053288 GN=CYP75B137 PE=1 SV=1	PF08362//PF00067	YcdC-like protein, C-terminal region//Cytochrome P450	GO:0055114//GO:0045892	oxidation-reduction process//negative regulation of transcription, DNA-templated	GO:0016705//GO:0020037//GO:0005506	oxidoreductase activity, acting on paired donors, with incorporation or reduction of molecular oxygen//heme binding//iron ion binding	--	--	--	--	DOWN	-5.16412	8.6e-15	DOWN	-2.35419	1.68e-06	DOWN	-7.62369	1.36e-30	DOWN	-3.03202	1.64e-07	DOWN	-5.43476	1.29e-21
Cluster-11149.47127	0	0	0	1.43	7.97	904	1276261446	PIN18284.1	899	3.7e-94	Cytochrome P450 CYP2 subfamily [Handroanthus impetiginosus]	--	--	--	--	--	-	-	-	http://www.genome.jp/dbget-bin/www_bget?ko:-	Q8VWZ7	437	5.3e-42	geraniol 8-hydroxylase OS=Catharanthus roseus OX=4058 GN=CYP76B6 PE=1 SV=1	PF00067	Cytochrome P450	GO:0055114	oxidation-reduction process	GO:0020037//GO:0005506//GO:0016705	heme binding//iron ion binding//oxidoreductase activity, acting on paired donors, with incorporation or reduction of molecular oxygen	--	--	--	--	DOWN	-7.34242	0.000360496	DOWN	-2.87324	1.09e-06	DOWN	-10.0596	1.06e-15	DOWN	-7.16946	0.00074173	DOWN	-9.81903	2.17e-14
10-hydroxygeraniol dehydrogenase (10HGO)
gene_id	fpkm(HFL)	fpkm(BJL)	fpkm(J9L)	fpkm(J9R)	fpkm(J9AR)	Gene Length	NR GI	NR ID	NR Score	NR Evalue	NR Description	NT GI	NT ID	NT Score	NT Evalue	NT Description	KO ID	KO Name	KO Description	Http Link	Swissprot ID	Swissprot Score	Swissprot Evalue	Swissprot Description	PFAM ID	PFAM description	Gene Ontology Biological Pathway	BP Description	Gene Ontology Molecular Function	MF Description	Gene Ontology Cellular Component	CC Description	KOG ID	KOG Description	UP_DOWN_REGULATION(BJ_LvsJ9_R)	log2FC(BJ_LvsJ9_R)	q value(BJ_LvsJ9_R)	UP_DOWN_REGULATION(J9_RvsJ9_X)	log2FC(J9_RvsJ9_X)	q value(J9_RvsJ9_X)	UP_DOWN_REGULATION(BJ_LvsJ9_X)	log2FC(BJ_LvsJ9_X)	q value(BJ_LvsJ9_X)	UP_DOWN_REGULATION(HF_LvsJ9_R)	log2FC(HF_LvsJ9_R)	q value(HF_LvsJ9_R)	UP_DOWN_REGULATION(HF_LvsJ9_X)	log2FC(HF_LvsJ9_X)	q value(HF_LvsJ9_X)
Cluster-11149.34192	4.57	7.1	56.76	0.13	0.81	570	747098847	XP_011097455.1	770	2.1e-79	8-hydroxygeraniol dehydrogenase [Sesamum indicum]	XM_011099151.2	XM_011099151	285	2.36e-145	PREDICTED: Sesamum indicum 8-hydroxygeraniol dehydrogenase-like (LOC105176370), transcript variant X1, mRNA	K00083	E1.1.1.195	cinnamyl-alcohol dehydrogenase	http://www.genome.jp/dbget-bin/www_bget?ko:K00083	Q6V4H0	694	5.3e-72	8-hydroxygeraniol dehydrogenase OS=Catharanthus roseus OX=4058 GN=10HGO PE=1 SV=1	PF08240//PF02826//PF00107	Alcohol dehydrogenase GroES-like domain//D-isomer specific 2-hydroxyacid dehydrogenase, NAD binding domain//Zinc-binding dehydrogenase	GO:0055114	oxidation-reduction process	GO:0051287	NAD binding	--	--	--	--	UP	5.78303	4.49e-08	FALSE	-2.84189	0.271886	UP	2.82076	0.000272701	UP	5.56431	2.25e-07	UP	2.68022	0.000910612
Cluster-11149.22551	37.6	9.9	129.2	1.31	0	1446	1276245721	PIN05728.1	1550	1.9e-169	Alcohol dehydrogenase, class V [Handroanthus impetiginosus]	XM_011101656.2	XM_011101656	648	0	PREDICTED: Sesamum indicum 8-hydroxygeraniol dehydrogenase (LOC105178229), mRNA	K00083	E1.1.1.195	cinnamyl-alcohol dehydrogenase	http://www.genome.jp/dbget-bin/www_bget?ko:K00083	Q6V4H0	1384	1.3e-151	8-hydroxygeraniol dehydrogenase OS=Catharanthus roseus OX=4058 GN=10HGO PE=1 SV=1	PF02826//PF02737//PF00107//PF08240	D-isomer specific 2-hydroxyacid dehydrogenase, NAD binding domain//3-hydroxyacyl-CoA dehydrogenase, NAD binding domain//Zinc-binding dehydrogenase//Alcohol dehydrogenase GroES-like domain	GO:0006550//GO:0006552//GO:0006568//GO:0018874//GO:0006631//GO:0006633//GO:0055114//GO:0006554//GO:0006574	isoleucine catabolic process//leucine catabolic process//tryptophan metabolic process//benzoate metabolic process//fatty acid metabolic process//fatty acid biosynthetic process//oxidation-reduction process//lysine catabolic process//valine catabolic process	GO:0003857//GO:0016491//GO:0051287	3-hydroxyacyl-CoA dehydrogenase activity//oxidoreductase activity//NAD binding	--	--	--	--	UP	3.12122	8.35e-09	UP	8.01827	2.83e-06	UP	10.9428	8.98e-20	UP	5.51382	3.18e-23	UP	13.1559	1.1e-35
Cluster-11149.34028	10.92	8.23	39.78	6.29	5.61	1539	747098843	XP_011097453.1	1128	1.8e-120	8-hydroxygeraniol dehydrogenase-like isoform X1 [Sesamum indicum]	XM_011099151.2	XM_011099151	487	0	PREDICTED: Sesamum indicum 8-hydroxygeraniol dehydrogenase-like (LOC105176370), transcript variant X1, mRNA	K00083	E1.1.1.195	cinnamyl-alcohol dehydrogenase	http://www.genome.jp/dbget-bin/www_bget?ko:K00083	Q6V4H0	949	3.8e-101	8-hydroxygeraniol dehydrogenase OS=Catharanthus roseus OX=4058 GN=10HGO PE=1 SV=1	PF08240//PF02826//PF00107//PF03176	Alcohol dehydrogenase GroES-like domain//D-isomer specific 2-hydroxyacid dehydrogenase, NAD binding domain//Zinc-binding dehydrogenase//MMPL family	GO:0055114	oxidation-reduction process	GO:0051287	NAD binding	GO:0016020	membrane	--	--	FALSE	0.591	0.449279	FALSE	-0.231843	0.895361	FALSE	0.248895	0.788328	FALSE	1.46875	0.0062808	FALSE	1.18684	0.0245024
Cluster-11149.31967	29.27	49.46	68.46	7.3	15.74	2326	1276245154	PIN05325.1	1469	7.7e-160	Alcohol dehydrogenase, class V [Handroanthus impetiginosus]	XM_019321954.1	XM_019321954	102	5.42e-43	PREDICTED: Ipomoea nil mannitol dehydrogenase-like (LOC109172720), mRNA	K00083	E1.1.1.195	cinnamyl-alcohol dehydrogenase	http://www.genome.jp/dbget-bin/www_bget?ko:K00083	Q6V4H0	1392	2.5e-152	8-hydroxygeraniol dehydrogenase OS=Catharanthus roseus OX=4058 GN=10HGO PE=1 SV=1	PF08240//PF02826//PF00107//PF03446//PF02737	Alcohol dehydrogenase GroES-like domain//D-isomer specific 2-hydroxyacid dehydrogenase, NAD binding domain//Zinc-binding dehydrogenase//NAD binding domain of 6-phosphogluconate dehydrogenase//3-hydroxyacyl-CoA dehydrogenase, NAD binding domain	GO:0006633//GO:0018874//GO:0006631//GO:0006550//GO:0006568//GO:0006552//GO:0006574//GO:0006554//GO:0055114	fatty acid biosynthetic process//benzoate metabolic process//fatty acid metabolic process//isoleucine catabolic process//tryptophan metabolic process//leucine catabolic process//valine catabolic process//lysine catabolic process//oxidation-reduction process	GO:0050661//GO:0003857//GO:0016491//GO:0051287	NADP binding//3-hydroxyacyl-CoA dehydrogenase activity//oxidoreductase activity//NAD binding	--	--	--	--	UP	2.96	1.13e-09	DOWN	-1.50404	0.00369473	FALSE	1.34591	0.00586292	UP	2.67749	3.74e-08	FALSE	1.12345	0.0256116
Cluster-11149.31508	27.74	21.09	142.74	0.08	0.08	1300	747070027	XP_011081820.1	531	2.5e-51	alcohol dehydrogenase-like 1 [Sesamum indicum]	XM_020694161.1	XM_020694161	225	1.26e-111	PREDICTED: Sesamum indicum alcohol dehydrogenase-like 1 (LOC105164765), mRNA	K00121	frmA, ADH5, adhC	S-(hydroxymethyl)glutathione dehydrogenase / alcohol dehydrogenase [EC:1.1.1.284 1.1.1.1]	http://www.genome.jp/dbget-bin/www_bget?ko:K00121	W8JWV8	371	3.4e-34	8-hydroxygeraniol oxidoreductase OS=Catharanthus roseus OX=4058 GN=8HGO PE=1 SV=1	PF12202//PF00107	Oxidative-stress-responsive kinase 1 C-terminal domain//Zinc-binding dehydrogenase	GO:0055114//GO:0016310//GO:0009069	oxidation-reduction process//phosphorylation//serine family amino acid metabolic process	GO:0004674//GO:0005524	protein serine/threonine kinase activity//ATP binding	--	--	KOG0022	Alcohol dehydrogenase, class III	UP	8.14347	5.68e-27	FALSE	-0.399847	1	UP	7.62381	1.28e-23	UP	8.99462	8.52e-33	UP	8.5335	5.36e-30
Cluster-11149.26390	68.3	134.43	38.41	198.5	353.55	1427	1276245154	PIN05325.1	819	1.1e-84	Alcohol dehydrogenase, class V [Handroanthus impetiginosus]	XM_022999635.1	XM_022999635	54	1.59e-16	PREDICTED: Olea europaea var. sylvestris 8-hydroxygeraniol dehydrogenase-like (LOC111376665), mRNA	K00083	E1.1.1.195	cinnamyl-alcohol dehydrogenase	http://www.genome.jp/dbget-bin/www_bget?ko:K00083	Q6V4H0	785	3.7e-82	8-hydroxygeraniol dehydrogenase OS=Catharanthus roseus OX=4058 GN=10HGO PE=1 SV=1	PF08240//PF02649//PF02826//PF02737//PF00107	Alcohol dehydrogenase GroES-like domain//Type I GTP cyclohydrolase folE2//D-isomer specific 2-hydroxyacid dehydrogenase, NAD binding domain//3-hydroxyacyl-CoA dehydrogenase, NAD binding domain//Zinc-binding dehydrogenase	GO:0006574//GO:0006554//GO:0055114//GO:0006807//GO:0006631//GO:0018874//GO:0006633//GO:0006550//GO:0006552//GO:0006568	valine catabolic process//lysine catabolic process//oxidation-reduction process//nitrogen compound metabolic process//fatty acid metabolic process//benzoate metabolic process//fatty acid biosynthetic process//isoleucine catabolic process//leucine catabolic process//tryptophan metabolic process	GO:0016491//GO:0051287//GO:0003857//GO:0003933	oxidoreductase activity//NAD binding//3-hydroxyacyl-CoA dehydrogenase activity//GTP cyclohydrolase activity	--	--	--	--	FALSE	-0.358218	0.740158	FALSE	-1.22972	0.0190744	DOWN	-1.69871	0.000329625	FALSE	-0.866212	0.141967	DOWN	-2.14593	5.02e-06
Cluster-11149.31299	23.92	16.69	104.23	0.32	0.04	1292	1173795217	XP_020549820.1	748	1.7e-76	alcohol dehydrogenase-like 1 [Sesamum indicum]	XM_011083665.2	XM_011083665	256	7.33e-129	PREDICTED: Sesamum indicum alcohol dehydrogenase-like 1 (LOC105164860), transcript variant X2, mRNA	K00121	frmA, ADH5, adhC	S-(hydroxymethyl)glutathione dehydrogenase / alcohol dehydrogenase [EC:1.1.1.284 1.1.1.1]	http://www.genome.jp/dbget-bin/www_bget?ko:K00121	W8JWV8	657	2.3e-67	8-hydroxygeraniol oxidoreductase OS=Catharanthus roseus OX=4058 GN=8HGO PE=1 SV=1	PF02826//PF00107//PF03721//PF02254//PF08240	D-isomer specific 2-hydroxyacid dehydrogenase, NAD binding domain//Zinc-binding dehydrogenase//UDP-glucose/GDP-mannose dehydrogenase family, NAD binding domain//TrkA-N domain//Alcohol dehydrogenase GroES-like domain	GO:0055114//GO:0006813	oxidation-reduction process//potassium ion transport	GO:0051287//GO:0016616	NAD binding//oxidoreductase activity, acting on the CH-OH group of donors, NAD or NADP as acceptor	--	--	KOG0022	Alcohol dehydrogenase, class III	UP	5.86564	5.15e-20	FALSE	2.45465	0.271886	UP	8.19988	3.02e-22	UP	6.84925	2.13e-26	UP	9.2209	1.82e-28
Cluster-11149.13702	8.24	13.36	6.66	97.42	1389.99	527	1217045288	XP_021662714.1	412	6.4e-38	8-hydroxygeraniol dehydrogenase-like [Hevea brasiliensis]	XM_018649136.1	XM_018649136	77	9.2e-30	PREDICTED: Pyrus x bretschneideri probable mannitol dehydrogenase (LOC103954150), mRNA	K00083	E1.1.1.195	cinnamyl-alcohol dehydrogenase	http://www.genome.jp/dbget-bin/www_bget?ko:K00083	Q9ZRF1	384	4.3e-36	Probable mannitol dehydrogenase OS=Fragaria ananassa OX=3747 GN=CAD PE=2 SV=1	PF00107	Zinc-binding dehydrogenase	GO:0055114	oxidation-reduction process	--	--	--	--	--	--	DOWN	-2.63796	2.35e-07	DOWN	-4.23471	4.27e-17	DOWN	-6.98309	2.16e-35	DOWN	-2.90341	2.43e-08	DOWN	-7.18757	3.15e-36
Cluster-11149.9077	15.72	14.28	18.47	17.02	18.09	1708	1276237593	PIN00118.1	1377	2.6e-149	Alcohol dehydrogenase, class V [Handroanthus impetiginosus]	XM_011085136.2	XM_011085136	449	0	PREDICTED: Sesamum indicum 8-hydroxygeraniol dehydrogenase-like (LOC105165971), mRNA	K00083	E1.1.1.195	cinnamyl-alcohol dehydrogenase	http://www.genome.jp/dbget-bin/www_bget?ko:K00083	Q6V4H0	1254	1.8e-136	8-hydroxygeraniol dehydrogenase OS=Catharanthus roseus OX=4058 GN=10HGO PE=1 SV=1	PF02826//PF08240//PF00107//PF03446//PF02737	D-isomer specific 2-hydroxyacid dehydrogenase, NAD binding domain//Alcohol dehydrogenase GroES-like domain//Zinc-binding dehydrogenase//NAD binding domain of 6-phosphogluconate dehydrogenase//3-hydroxyacyl-CoA dehydrogenase, NAD binding domain	GO:0018874//GO:0006633//GO:0006631//GO:0006550//GO:0006552//GO:0006568//GO:0006554//GO:0006574//GO:0055114	benzoate metabolic process//fatty acid biosynthetic process//fatty acid metabolic process//isoleucine catabolic process//leucine catabolic process//tryptophan metabolic process//lysine catabolic process//valine catabolic process//oxidation-reduction process	GO:0003857//GO:0050661//GO:0016491//GO:0051287	3-hydroxyacyl-CoA dehydrogenase activity//NADP binding//oxidoreductase activity//NAD binding	--	--	--	--	FALSE	-0.0500542	1	FALSE	-0.484242	0.536159	FALSE	-0.645042	0.261303	FALSE	0.558976	0.447534	FALSE	0.0247406	1
Cluster-11149.35527	0.08	2.55	2.6	3.87	7.62	1354	--	--	--	--	--	KF926076.1	KF926076	118	3.98e-52	Pogostemon cablin 10-hydroxygeraniol oxidoreductase (10HGO1) mRNA, partial cds	--	--	--	--	--	--	--	--	--	--	--	--	--	--	--	--	--	--	FALSE	-0.393975	0.780568	FALSE	-1.37415	0.0163929	DOWN	-1.87853	0.00037971	DOWN	-4.9137	3.02e-08	DOWN	-6.32417	2.72e-15
Cluster-11149.19581	3	2.73	19.62	0.25	0.49	1394	747098845	XP_011097454.1	774	1.8e-79	8-hydroxygeraniol dehydrogenase-like isoform X2 [Sesamum indicum]	KX058441.1	KX058441	293	2.14e-149	Tectona grandis cinnamyl alcohol dehydrogenase 4 (CAD4) mRNA, partial cds	K00083	E1.1.1.195	cinnamyl-alcohol dehydrogenase	http://www.genome.jp/dbget-bin/www_bget?ko:K00083	Q6V4H0	626	9.9e-64	8-hydroxygeraniol dehydrogenase OS=Catharanthus roseus OX=4058 GN=10HGO PE=1 SV=1	PF00107//PF08240//PF02826	Zinc-binding dehydrogenase//Alcohol dehydrogenase GroES-like domain//D-isomer specific 2-hydroxyacid dehydrogenase, NAD binding domain	GO:0055114	oxidation-reduction process	GO:0051287	NAD binding	--	--	--	--	UP	3.60113	7.17e-07	FALSE	-1.32284	0.357601	UP	2.16585	0.001421	UP	4.20189	1.18e-09	UP	2.8286	1.26e-05
Cluster-11149.26236	94.14	163.14	186.53	238.33	541.65	2567	1278996412	XP_022851765.1	1312	1.4e-141	8-hydroxygeraniol dehydrogenase-like [Olea europaea var. sylvestris]	XM_011099154.2	XM_011099154	502	0	PREDICTED: Sesamum indicum 8-hydroxygeraniol dehydrogenase (LOC105176373), mRNA	K00083	E1.1.1.195	cinnamyl-alcohol dehydrogenase	http://www.genome.jp/dbget-bin/www_bget?ko:K00083	Q6V4H0	1252	4.7e-136	8-hydroxygeraniol dehydrogenase OS=Catharanthus roseus OX=4058 GN=10HGO PE=1 SV=1	PF02737//PF00107//PF08240//PF02826	3-hydroxyacyl-CoA dehydrogenase, NAD binding domain//Zinc-binding dehydrogenase//Alcohol dehydrogenase GroES-like domain//D-isomer specific 2-hydroxyacid dehydrogenase, NAD binding domain	GO:0055114//GO:0006554//GO:0006574//GO:0006552//GO:0006568//GO:0006550//GO:0018874//GO:0006631//GO:0006633	oxidation-reduction process//lysine catabolic process//valine catabolic process//leucine catabolic process//tryptophan metabolic process//isoleucine catabolic process//benzoate metabolic process//fatty acid metabolic process//fatty acid biosynthetic process	GO:0051287//GO:0016491//GO:0003857	NAD binding//oxidoreductase activity//3-hydroxyacyl-CoA dehydrogenase activity	--	--	--	--	FALSE	-0.345916	0.747173	DOWN	-1.58054	0.00153876	DOWN	-2.03724	1.32e-05	FALSE	-0.66462	0.309124	DOWN	-2.29516	9.71e-07
Cluster-11149.19580	4.81	2.9	34.79	0.78	0.53	412	1276267785	PIN23677.1	262	1.2e-20	Alcohol dehydrogenase, class V [Handroanthus impetiginosus]	--	--	--	--	--	-	-	-	http://www.genome.jp/dbget-bin/www_bget?ko:-	Q6V4H0	234	8.3e-19	8-hydroxygeraniol dehydrogenase OS=Catharanthus roseus OX=4058 GN=10HGO PE=1 SV=1	--	--	--	--	--	--	--	--	--	--	FALSE	2.08905	0.224392	FALSE	0.152607	1	FALSE	2.12625	0.146068	UP	3.19976	0.00406535	FALSE	3.29037	0.00689619
Cluster-11149.43871	0	0.28	2.81	0	0	557	747103529	XP_011099958.1	216	3.6e-15	8-hydroxygeraniol dehydrogenase [Sesamum indicum]	--	--	--	--	--	K00083	E1.1.1.195	cinnamyl-alcohol dehydrogenase	http://www.genome.jp/dbget-bin/www_bget?ko:K00083	Q2KNL6	201	7.6e-15	Geraniol dehydrogenase 1 OS=Ocimum basilicum OX=39350 GN=GEDH1 PE=1 SV=1	PF00107//PF02826	Zinc-binding dehydrogenase//D-isomer specific 2-hydroxyacid dehydrogenase, NAD binding domain	GO:0055114	oxidation-reduction process	GO:0051287	NAD binding	--	--	--	--	FALSE	4.21768	0.835728	FALSE	0	1	FALSE	3.96602	0.705108	FALSE	0	1	FALSE	0	1
epi-iridoid synthase (epi-ISY)
gene_id	fpkm(HFL)	fpkm(BJL)	fpkm(J9L)	fpkm(J9R)	fpkm(J9AR)	Gene Length	NR GI	NR ID	NR Score	NR Evalue	NR Description	NT GI	NT ID	NT Score	NT Evalue	NT Description	KO ID	KO Name	KO Description	Http Link	Swissprot ID	Swissprot Score	Swissprot Evalue	Swissprot Description	PFAM ID	PFAM description	Gene Ontology Biological Pathway	BP Description	Gene Ontology Molecular Function	MF Description	Gene Ontology Cellular Component	CC Description	KOG ID	KOG Description	UP_DOWN_REGULATION(BJ_LvsJ9_R)	log2FC(BJ_LvsJ9_R)	q value(BJ_LvsJ9_R)	UP_DOWN_REGULATION(J9_RvsJ9_X)	log2FC(J9_RvsJ9_X)	q value(J9_RvsJ9_X)	UP_DOWN_REGULATION(BJ_LvsJ9_X)	log2FC(BJ_LvsJ9_X)	q value(BJ_LvsJ9_X)	UP_DOWN_REGULATION(HF_LvsJ9_R)	log2FC(HF_LvsJ9_R)	q value(HF_LvsJ9_R)	UP_DOWN_REGULATION(HF_LvsJ9_X)	log2FC(HF_LvsJ9_X)	q value(HF_LvsJ9_X)
Cluster-11149.20854	95.99	54.05	254.93	4.43	2	2013	1276240753	PIN02151.1	1824	4.6e-201	3-oxo-5-beta-steroid 4-dehydrogenase [Handroanthus impetiginosus]	XM_011071474.2	XM_011071474	565	0	PREDICTED: Sesamum indicum 3-oxo-Delta(4,5)-steroid 5-beta-reductase-like (LOC105155583), mRNA	-	-	-	http://www.genome.jp/dbget-bin/www_bget?ko:-	A0A1C9CX66	1639	4.9e-181	Iridoid synthase CYC2 OS=Camptotheca acuminata OX=16922 GN=CYC2 PE=1 SV=1	--	--	--	--	--	--	--	--	--	--	UP	3.81103	2.09e-14	FALSE	0.748421	0.293348	UP	4.44851	3.46e-18	UP	5.11216	8.2e-23	UP	5.81019	4.28e-27
Cluster-11149.27465	47.66	35.85	220.23	3.06	0.18	2113	1218187730	ASM61954.1	1814	6.9e-200	iridoid synthase [Antirrhinum majus]	XM_011071475.2	XM_011071475	446	0	PREDICTED: Sesamum indicum iridoid synthase-like (LOC105155584), mRNA	-	-	-	http://www.genome.jp/dbget-bin/www_bget?ko:-	K7WDL7	1368	1.4e-149	Iridoid synthase OS=Catharanthus roseus OX=4058 PE=1 SV=1	--	--	--	--	--	--	--	--	--	--	UP	3.75262	8.3e-14	UP	3.63458	5.87e-08	UP	7.2752	1.78e-30	UP	4.63638	2.09e-19	UP	8.21626	1.92e-36
Cluster-11149.44003	1.84	2.73	13.31	4.19	7.37	1540	1276234905	PIM98554.1	1806	4.3e-199	3-oxo-5-beta-steroid 4-dehydrogenase [Handroanthus impetiginosus]	MF281394.1	MF281394	414	0	Antirrhinum majus isolate Am.26155 iridoid synthase-like protein mRNA, complete cds	-	-	-	http://www.genome.jp/dbget-bin/www_bget?ko:-	Q6PQJ9	1690	4.6e-187	3-oxo-Delta(4,5)-steroid 5-beta-reductase OS=Digitalis lanata OX=49450 PE=1 SV=1	PF01370	NAD dependent epimerase/dehydratase family	--	--	GO:0003824//GO:0050662	catalytic activity//obsolete coenzyme binding	--	--	--	--	FALSE	-0.413651	0.741373	FALSE	-1.21163	0.036604	DOWN	-1.73577	0.000838948	FALSE	-0.51262	0.605108	DOWN	-1.7738	0.000897822
deoxyloganetic acid synthase-like （DLS-like）
gene_id	fpkm(HFL)	fpkm(BJL)	fpkm(J9L)	fpkm(J9R)	fpkm(J9AR)	Gene Length	NR GI	NR ID	NR Score	NR Evalue	NR Description	NT GI	NT ID	NT Score	NT Evalue	NT Description	KO ID	KO Name	KO Description	Http Link	Swissprot ID	Swissprot Score	Swissprot Evalue	Swissprot Description	PFAM ID	PFAM description	Gene Ontology Biological Pathway	BP Description	Gene Ontology Molecular Function	MF Description	Gene Ontology Cellular Component	CC Description	KOG ID	KOG Description	UP_DOWN_REGULATION(BJ_LvsJ9_R)	log2FC(BJ_LvsJ9_R)	q value(BJ_LvsJ9_R)	UP_DOWN_REGULATION(J9_RvsJ9_X)	log2FC(J9_RvsJ9_X)	q value(J9_RvsJ9_X)	UP_DOWN_REGULATION(BJ_LvsJ9_X)	log2FC(BJ_LvsJ9_X)	q value(BJ_LvsJ9_X)	UP_DOWN_REGULATION(HF_LvsJ9_R)	log2FC(HF_LvsJ9_R)	q value(HF_LvsJ9_R)	UP_DOWN_REGULATION(HF_LvsJ9_X)	log2FC(HF_LvsJ9_X)	q value(HF_LvsJ9_X)
Cluster-11149.44933	0.2	0.43	0.21	3.49	10.69	1904	1276247119	PIN06798.1	2079	1.2e-230	Cytochrome P450 CYP2 subfamily [Handroanthus impetiginosus]	--	--	--	--	--	K20618	CYP76A	cytochrome P450 family 76 subfamily A	http://www.genome.jp/dbget-bin/www_bget?ko:K20618	W8JIS5	1063	2.9e-114	Iridoid oxidase OS=Catharanthus roseus OX=4058 GN=IO PE=1 SV=1	PF00067	Cytochrome P450	GO:0055114	oxidation-reduction process	GO:0016705//GO:0020037//GO:0005506	oxidoreductase activity, acting on paired donors, with incorporation or reduction of molecular oxygen//heme binding//iron ion binding	--	--	--	--	DOWN	-2.82535	4.66e-06	DOWN	-2.00848	8.61e-05	DOWN	-4.94264	1.53e-17	DOWN	-3.40314	7.67e-07	DOWN	-5.45804	3.75e-18
Cluster-11149.41747	0.66	0.69	0.49	0.57	2.8	698	848871008	XP_012836085.1	265	9.5e-21	PREDICTED: uncharacterized protein LOC105956739 [Erythranthe guttata]	--	--	--	--	--	K20618	CYP76A	cytochrome P450 family 76 subfamily A	http://www.genome.jp/dbget-bin/www_bget?ko:K20618	W8JIS5	209	1.1e-15	Iridoid oxidase OS=Catharanthus roseus OX=4058 GN=IO PE=1 SV=1	PF00067	Cytochrome P450	GO:0055114	oxidation-reduction process	GO:0016705//GO:0005506//GO:0020037	oxidoreductase activity, acting on paired donors, with incorporation or reduction of molecular oxygen//iron ion binding//heme binding	--	--	--	--	FALSE	0.477097	0.956457	DOWN	-2.66843	0.00304105	FALSE	-2.29937	0.0061719	FALSE	0.860207	0.806498	FALSE	-1.85294	0.0486429
Cluster-11149.43146	1.12	1.38	0.8	3	19.1	405	747093271	XP_011094433.1	255	7.9e-20	cytochrome P450 76A1-like [Sesamum indicum]	--	--	--	--	--	-	-	-	http://www.genome.jp/dbget-bin/www_bget?ko:-	W8JIS5	192	6.1e-14	Iridoid oxidase OS=Catharanthus roseus OX=4058 GN=IO PE=1 SV=1	PF00067	Cytochrome P450	GO:0055114	oxidation-reduction process	GO:0016705//GO:0005506//GO:0020037	oxidoreductase activity, acting on paired donors, with incorporation or reduction of molecular oxygen//iron ion binding//heme binding	--	--	--	--	FALSE	-0.858962	0.841342	DOWN	-3.0573	7.45e-06	DOWN	-4.02156	4.67e-08	FALSE	-0.765938	0.806498	DOWN	-3.8654	1.28e-06
Cluster-11149.1381	0	0.63	0	2.52	17.57	384	747093271	XP_011094433.1	507	4.5e-49	cytochrome P450 76A1-like [Sesamum indicum]	--	--	--	--	--	K20618	CYP76A	cytochrome P450 family 76 subfamily A	http://www.genome.jp/dbget-bin/www_bget?ko:K20618	W8JIS5	394	2.2e-37	Iridoid oxidase OS=Catharanthus roseus OX=4058 GN=IO PE=1 SV=1	PF00067	Cytochrome P450	GO:0055114	oxidation-reduction process	GO:0020037//GO:0005506//GO:0016705	heme binding//iron ion binding//oxidoreductase activity, acting on paired donors, with incorporation or reduction of molecular oxygen	--	--	--	--	FALSE	-1.68255	0.521897	DOWN	-3.18274	9.47e-06	DOWN	-4.96176	7.96e-09	FALSE	-5.72923	0.093697	DOWN	-8.68749	5.35e-09
Cluster-11149.11401	3.02	3.42	1.41	44.98	378.03	1629	848871008	XP_012836085.1	1985	7.9e-220	PREDICTED: uncharacterized protein LOC105956739 [Erythranthe guttata]	--	--	--	--	--	K20618	CYP76A	cytochrome P450 family 76 subfamily A	http://www.genome.jp/dbget-bin/www_bget?ko:K20618	W8JIS5	1470	1.6e-161	Iridoid oxidase OS=Catharanthus roseus OX=4058 GN=IO PE=1 SV=1	PF00067//PF10716//PF11770	Cytochrome P450//NADH dehydrogenase transmembrane subunit//GRB2-binding adapter (GAPT)	GO:0055114//GO:0006118	oxidation-reduction process//obsolete electron transport	GO:0016655//GO:0016705//GO:0020037//GO:0005506	oxidoreductase activity, acting on NAD(P)H, quinone or similar compound as acceptor//oxidoreductase activity, acting on paired donors, with incorporation or reduction of molecular oxygen//heme binding//iron ion binding	GO:0016021	integral component of membrane	--	--	DOWN	-3.51448	2.78e-12	DOWN	-3.4676	1.04e-12	DOWN	-7.09256	1.87e-36	DOWN	-3.22424	1.28e-10	DOWN	-6.74154	6.93e-34
Cluster-11149.38577	1.91	5.96	4.34	7.48	9.52	1405	747093271	XP_011094433.1	1399	6.1e-152	cytochrome P450 76A1-like [Sesamum indicum]	--	--	--	--	--	K20618	CYP76A	cytochrome P450 family 76 subfamily A	http://www.genome.jp/dbget-bin/www_bget?ko:K20618	W8JIS5	1016	6e-109	Iridoid oxidase OS=Catharanthus roseus OX=4058 GN=IO PE=1 SV=1	PF00067//PF11087	Cytochrome P450//PRD1 phage membrane DNA delivery	GO:0055114	oxidation-reduction process	GO:0020037//GO:0005506//GO:0016705	heme binding//iron ion binding//oxidoreductase activity, acting on paired donors, with incorporation or reduction of molecular oxygen	GO:0039641	viral inner membrane	--	--	FALSE	-0.124861	1	FALSE	-0.743403	0.268456	FALSE	-0.97892	0.0732329	FALSE	-1.29536	0.034396	DOWN	-2.08829	7.56e-05
Cluster-11149.5266	0.49	2.41	1.05	2.16	5.41	603	747093271	XP_011094433.1	597	2.6e-59	cytochrome P450 76A1-like [Sesamum indicum]	--	--	--	--	--	K20618	CYP76A	cytochrome P450 family 76 subfamily A	http://www.genome.jp/dbget-bin/www_bget?ko:K20618	W8JIS5	497	3.9e-49	Iridoid oxidase OS=Catharanthus roseus OX=4058 GN=IO PE=1 SV=1	PF00067	Cytochrome P450	GO:0055114	oxidation-reduction process	GO:0016705//GO:0005506//GO:0020037	oxidoreductase activity, acting on paired donors, with incorporation or reduction of molecular oxygen//iron ion binding//heme binding	--	--	--	--	FALSE	0.371718	0.954215	FALSE	-1.71404	0.0189184	FALSE	-1.45216	0.0355234	FALSE	-1.46867	0.25536	DOWN	-3.22571	0.000206744
Cluster-11149.35893	2.49	6.95	4.34	7.16	8.15	732	747093271	XP_011094433.1	872	4.1e-91	cytochrome P450 76A1-like [Sesamum indicum]	--	--	--	--	--	K20618	CYP76A	cytochrome P450 family 76 subfamily A	http://www.genome.jp/dbget-bin/www_bget?ko:K20618	W8JIS5	582	6.6e-59	Iridoid oxidase OS=Catharanthus roseus OX=4058 GN=IO PE=1 SV=1	PF13001//PF00067	Proteasome stabiliser//Cytochrome P450	GO:0055114//GO:0043248	oxidation-reduction process//proteasome assembly	GO:0016705//GO:0060090//GO:0005506//GO:0020037	oxidoreductase activity, acting on paired donors, with incorporation or reduction of molecular oxygen//molecular adaptor activity//iron ion binding//heme binding	--	--	--	--	FALSE	0.168961	1	FALSE	-0.584817	0.499317	FALSE	-0.526428	0.448908	FALSE	-0.858949	0.305602	FALSE	-1.49299	0.0155358
Cluster-11149.35894	0.68	1.04	1.31	7.37	29.52	945	747093271	XP_011094433.1	1005	2e-106	cytochrome P450 76A1-like [Sesamum indicum]	XM_011096131.2	XM_011096131	291	1.86e-148	PREDICTED: Sesamum indicum cytochrome P450 76A1-like (LOC105174132), mRNA	K20618	CYP76A	cytochrome P450 family 76 subfamily A	http://www.genome.jp/dbget-bin/www_bget?ko:K20618	W8JIS5	654	3.8e-67	Iridoid oxidase OS=Catharanthus roseus OX=4058 GN=IO PE=1 SV=1	PF00067	Cytochrome P450	GO:0055114	oxidation-reduction process	GO:0016705//GO:0020037//GO:0005506	oxidoreductase activity, acting on paired donors, with incorporation or reduction of molecular oxygen//heme binding//iron ion binding	--	--	--	--	DOWN	-2.60217	4.23e-05	DOWN	-2.39794	2.25e-06	DOWN	-5.10899	7.02e-19	DOWN	-2.76931	2.84e-05	DOWN	-5.21462	3.99e-18
Cluster-11149.35892	0.39	3.43	2.46	8.2	43.99	805	747093271	XP_011094433.1	1092	1.4e-116	cytochrome P450 76A1-like [Sesamum indicum]	--	--	--	--	--	K20618	CYP76A	cytochrome P450 family 76 subfamily A	http://www.genome.jp/dbget-bin/www_bget?ko:K20618	W8JIS5	834	4.3e-88	Iridoid oxidase OS=Catharanthus roseus OX=4058 GN=IO PE=1 SV=1	PF00067	Cytochrome P450	GO:0055114	oxidation-reduction process	GO:0020037//GO:0005506//GO:0016705	heme binding//iron ion binding//oxidoreductase activity, acting on paired donors, with incorporation or reduction of molecular oxygen	--	--	--	--	FALSE	-1.04436	0.152909	DOWN	-2.81953	2.37e-08	DOWN	-3.97402	3.8e-14	DOWN	-3.72024	1.03e-06	DOWN	-6.58404	1.03e-22
Cluster-11149.10824	1.69	3.43	0.56	6.82	5.1	555	747093271	XP_011094433.1	382	2e-34	cytochrome P450 76A1-like [Sesamum indicum]	--	--	--	--	--	K20618	CYP76A	cytochrome P450 family 76 subfamily A	http://www.genome.jp/dbget-bin/www_bget?ko:K20618	W8JIS5	315	4.6e-28	Iridoid oxidase OS=Catharanthus roseus OX=4058 GN=IO PE=1 SV=1	PF00067	Cytochrome P450	GO:0055114	oxidation-reduction process	GO:0005506//GO:0020037//GO:0016705	iron ion binding//heme binding//oxidoreductase activity, acting on paired donors, with incorporation or reduction of molecular oxygen	--	--	--	--	FALSE	-0.763035	0.430421	FALSE	0.0200775	1	FALSE	-0.852821	0.314238	FALSE	-1.34348	0.141967	FALSE	-1.37179	0.0878635
Cluster-11149.30874	138.73	97.09	668.93	1	0.78	972	747093273	XP_011094434.1	1569	8.2e-172	cytochrome P450 76A1-like [Sesamum indicum]	--	--	--	--	--	K20618	CYP76A	cytochrome P450 family 76 subfamily A	http://www.genome.jp/dbget-bin/www_bget?ko:K20618	W8JIS5	1346	2.2e-147	Iridoid oxidase OS=Catharanthus roseus OX=4058 GN=IO PE=1 SV=1	PF00067	Cytochrome P450	GO:0055114	oxidation-reduction process	GO:0005506//GO:0020037//GO:0016705	iron ion binding//heme binding//oxidoreductase activity, acting on paired donors, with incorporation or reduction of molecular oxygen	--	--	--	--	UP	6.80223	7.31e-30	FALSE	-0.0373147	1	UP	6.65286	2.72e-28	UP	7.77703	1.46e-36	UP	7.68763	5.34e-35
Cluster-11149.43077	1.63	0.95	0.38	1.84	6.78	724	747093271	XP_011094433.1	645	8.5e-65	cytochrome P450 76A1-like [Sesamum indicum]	--	--	--	--	--	K20618	CYP76A	cytochrome P450 family 76 subfamily A	http://www.genome.jp/dbget-bin/www_bget?ko:K20618	W8JIS5	473	2.8e-46	Iridoid oxidase OS=Catharanthus roseus OX=4058 GN=IO PE=1 SV=1	PF00067	Cytochrome P450	GO:0055114	oxidation-reduction process	GO:0016705//GO:0020037//GO:0005506	oxidoreductase activity, acting on paired donors, with incorporation or reduction of molecular oxygen//heme binding//iron ion binding	--	--	--	--	FALSE	-0.733256	0.640627	DOWN	-2.26887	0.000375237	DOWN	-3.11031	2.81e-06	FALSE	0.482481	0.806498	FALSE	-1.83459	0.00527912
Cluster-11149.34412	5.97	6.22	33.81	0.06	0	1003	747093273	XP_011094434.1	348	3.2e-30	cytochrome P450 76A1-like [Sesamum indicum]	--	--	--	--	--	-	-	-	http://www.genome.jp/dbget-bin/www_bget?ko:-	W8JIS5	313	1.4e-27	Iridoid oxidase OS=Catharanthus roseus OX=4058 GN=IO PE=1 SV=1	PF00067	Cytochrome P450	GO:0055114	oxidation-reduction process	GO:0016705//GO:0005506//GO:0020037	oxidoreductase activity, acting on paired donors, with incorporation or reduction of molecular oxygen//iron ion binding//heme binding	--	--	--	--	UP	6.81365	2.62e-14	FALSE	2.9964	1	UP	9.60515	2.28e-13	UP	7.19491	2.95e-15	UP	9.82835	2.17e-14
Cluster-11149.10746	18.28	22.25	163.01	0	0.32	385	747093273	XP_011094434.1	304	1.6e-25	cytochrome P450 76A1-like [Sesamum indicum]	--	--	--	--	--	K20618	CYP76A	cytochrome P450 family 76 subfamily A	http://www.genome.jp/dbget-bin/www_bget?ko:K20618	W8JIS5	267	1.2e-22	Iridoid oxidase OS=Catharanthus roseus OX=4058 GN=IO PE=1 SV=1	PF00067	Cytochrome P450	GO:0055114	oxidation-reduction process	GO:0005506//GO:0020037//GO:0016705	iron ion binding//heme binding//oxidoreductase activity, acting on paired donors, with incorporation or reduction of molecular oxygen	--	--	--	--	UP	9.29003	3e-11	FALSE	-3.3742	1	UP	5.72619	2.46e-09	UP	9.21458	1.61e-10	UP	5.85922	6.94e-09
Cluster-11149.42161	3.19	4.87	1.24	33.51	227.57	600	747093271	XP_011094433.1	379	4.9e-34	cytochrome P450 76A1-like [Sesamum indicum]	--	--	--	--	--	-	-	-	http://www.genome.jp/dbget-bin/www_bget?ko:-	W8JIS5	321	9.9e-29	Iridoid oxidase OS=Catharanthus roseus OX=4058 GN=IO PE=1 SV=1	PF00067//PF08715	Cytochrome P450//Coronavirus papain-like peptidase	GO:0055114//GO:0006508	oxidation-reduction process//proteolysis	GO:0005506//GO:0016740//GO:0016705//GO:0004197//GO:0020037//GO:0008242	iron ion binding//transferase activity//oxidoreductase activity, acting on paired donors, with incorporation or reduction of molecular oxygen//cysteine-type endopeptidase activity//heme binding//omega peptidase activity	--	--	--	--	DOWN	-2.55756	2.66e-06	DOWN	-3.16262	1.2e-10	DOWN	-5.83015	5.45e-26	DOWN	-2.72611	1.22e-06	DOWN	-5.9376	7.03e-26
[truncated: 13 more columns]
