# Supplementary material for: Transcriptome Analysis Provides Insights into Catalpol Biosynthesis in the Medicinal Plant Rehmannia glutinosa and the Functional Characterization of RgGES Genes
Source: Genes (Basel). 2024 Jan 24;15(2):155. doi: 10.3390/genes15020155 (PMC10888080; doi:10.3390/genes15020155)
Supplement: Supplementary file 1 [file genes-15-00155-s001.zip › Supplementary Table S7.xlsx]

## Sheet: GT
Supplementary Table S7. Candidate UGT unigenes in R. glutinosa transcriptomes. The sequences which met the gene screening criteria were marked in red color. The unigenes related with the iridoids biosynthesis were highlighted with yellow color.
Gene number	name	Ffpkm(HFL)	Fpkm(BJL)	Fpkm(J9L)	Fpkm(J9R)	Fpkm(J9AR)	Gene Length	NR GI	NR ID	NR Score	NR Evalue	NR Description	NT GI	NT ID	NT Score	NT Evalue	NT Description	KO ID	KO Name	KO Description	Http Link	Swissprot ID	Swissprot Score	Swissprot Evalue	Swissprot Description	PFAM ID	PFAM description	Gene Ontology Biological Pathway	BP Description	Gene Ontology Molecular Function	MF Description	Gene Ontology Cellular Component	CC Description	KOG ID	KOG Description	UP_DOWN_REGULATION(BJ_LvsJ9_R)	log2FC(BJ_LvsJ9_R)	q value(BJ_LvsJ9_R)	UP_DOWN_REGULATION(J9_RvsJ9_X)	log2FC(J9_RvsJ9_X)	q value(J9_RvsJ9_X)	UP_DOWN_REGULATION(BJ_LvsJ9_X)	log2FC(BJ_LvsJ9_X)	q value(BJ_LvsJ9_X)	UP_DOWN_REGULATION(HF_LvsJ9_R)	log2FC(HF_LvsJ9_R)	q value(HF_LvsJ9_R)	UP_DOWN_REGULATION(HF_LvsJ9_X)	log2FC(HF_LvsJ9_X)
Cluster-11149.29597	RgUGT1	32.64	16.73	80.47	20.49	8.14	2453	1276248601	PIN07918.1	1432	1.6e-155	UDP-glucuronosyl and UDP-glucosyl transferase [Handroanthus impetiginosus]	XM_011101758.2	XM_011101758	486	0	PREDICTED: Sesamum indicum 7-deoxyloganetic acid glucosyltransferase-like (LOC105178300), mRNA	K21373	-	-	http://www.genome.jp/dbget-bin/www_bget?ko:K21373	U3U992	1093	1.2e-117	7-deoxyloganetic acid glucosyltransferase OS=Catharanthus roseus OX=4058 GN=UGT709C2 PE=1 SV=1	PF07491//PF00201	Protein phosphatase inhibitor//UDP-glucoronosyl and UDP-glucosyl transferase	GO:0032515	negative regulation of phosphoprotein phosphatase activity	GO:0004865//GO:0016758	protein serine/threonine phosphatase inhibitor activity//transferase activity, transferring hexosyl groups	--	--	--	--	FALSE	-0.0917504	1	FALSE	0.936028	0.105315	FALSE	0.733502	0.179334	FALSE	1.34657	0.00968193	UP	2.23253
Cluster-11149.34088	RgUGT2	14.42	9.53	29.16	6.95	2.68	1950	1269864873	XP_022752954.1	1506	3.3e-164	7-deoxyloganetin glucosyltransferase-like [Durio zibethinus]	CP027629.1	CP027629	68	3.6e-24	Linum usitatissimum chromosome Lu5	-	-	-	http://www.genome.jp/dbget-bin/www_bget?ko:-	F8WLS6	1439	7.4e-158	7-deoxyloganetin glucosyltransferase OS=Catharanthus roseus OX=4058 GN=UGT85A23 PE=1 SV=1	PF00201	UDP-glucoronosyl and UDP-glucosyl transferase	--	--	GO:0016758	transferase activity, transferring hexosyl groups	--	--	--	--	FALSE	0.657932	0.368777	FALSE	0.976	0.11214	UP	1.52311	0.00311444	UP	1.72687	0.000701704	UP	2.6526
Cluster-11149.40359	RgUGT3	5.66	5.82	8.07	5.96	3.53	1688	1279085576	XP_022842049.1	1699	1.2e-186	7-deoxyloganetic acid glucosyltransferase-like [Olea europaea var. sylvestris]	XM_012976304.1	XM_012976304	260	5.76e-131	PREDICTED: Erythranthe guttatus 7-deoxyloganetic acid glucosyltransferase-like (LOC105952723), mRNA	K21373	-	-	http://www.genome.jp/dbget-bin/www_bget?ko:K21373	U3U992	1185	1.8e-128	7-deoxyloganetic acid glucosyltransferase OS=Catharanthus roseus OX=4058 GN=UGT709C2 PE=1 SV=1	PF04101//PF00201	Glycosyltransferase family 28 C-terminal domain//UDP-glucoronosyl and UDP-glucosyl transferase	--	--	GO:0016758	transferase activity, transferring hexosyl groups	--	--	--	--	FALSE	0.168323	1	FALSE	0.357758	0.751054	FALSE	0.415344	0.569265	FALSE	0.59854	0.431609	FALSE	0.906184
Cluster-11149.21610	RgUGT4	16.78	48.54	58.19	56.68	10.32	1872	604298706	EYU18708.1	1677	4.7e-184	hypothetical protein MIMGU_mgv1a019962mg [Erythranthe guttata]	XM_013001823.1	XM_013001823	238	1.09e-118	PREDICTED: Erythranthe guttatus zeatin O-xylosyltransferase-like (LOC105976583), mRNA	K13495	CISZOG	cis-zeatin O-glucosyltransferase	http://www.genome.jp/dbget-bin/www_bget?ko:K13495	Q9ZSK5	1149	3e-124	Zeatin O-glucosyltransferase OS=Phaseolus lunatus OX=3884 GN=ZOG1 PE=2 SV=1	PF00201	UDP-glucoronosyl and UDP-glucosyl transferase	--	--	GO:0016758	transferase activity, transferring hexosyl groups	--	--	--	--	FALSE	-0.0214081	1	UP	2.06087	2.72e-05	UP	1.92867	5.28e-05	FALSE	-1.08138	0.0509125	FALSE	0.929441
Cluster-11149.26917	RgUGT5	9.28	11.54	9	5.26	2.66	6748	1276244486	PIN04843.1	1038	2.1e-109	Ceramide glucosyltransferase [Handroanthus impetiginosus]	XM_011095337.2	XM_011095337	420	0	PREDICTED: Sesamum indicum uncharacterized LOC105173554 (LOC105173554), mRNA	-	-	-	http://www.genome.jp/dbget-bin/www_bget?ko:-	--	--	--	--	PF13506//PF02285	Glycosyl transferase family 21//Cytochrome oxidase c subunit VIII	GO:0006123	mitochondrial electron transport, cytochrome c to oxygen	GO:0016757//GO:0004129	transferase activity, transferring glycosyl groups//cytochrome-c oxidase activity	GO:0045277	respiratory chain complex IV	--	--	FALSE	1.3311	0.0118751	FALSE	0.590269	0.391398	UP	1.81057	0.000156277	UP	1.49503	0.00342668	UP	2.03524
Cluster-11149.34709	RgUGT6	5.17	6.15	7.48	3.67	1.34	1790	747065359	XP_011079313.1	1712	3.9e-188	anthocyanidin 3-O-glucosyltransferase 7-like [Sesamum indicum]	XM_031398772.1	XM_031398772	57	4.3e-18	PREDICTED: Pistacia vera anthocyanidin 3-O-glucosyltransferase 7-like (LOC116112621), mRNA	-	-	-	http://www.genome.jp/dbget-bin/www_bget?ko:-	A0A2R6P624	1224	5.8e-133	Flavonol 3-O-glucosyltransferase F3GT2 OS=Actinidia chinensis var. chinensis OX=1590841 GN=F3GT2 PE=1 SV=1	PF00201	UDP-glucoronosyl and UDP-glucosyl transferase	--	--	GO:0016758	transferase activity, transferring hexosyl groups	--	--	--	--	FALSE	0.945308	0.144431	FALSE	1.05482	0.114406	UP	1.88922	0.000420682	FALSE	1.16687	0.0471103	UP	2.17113
Cluster-11149.24168	RgUGT7	217.92	198.32	202.61	154.75	101.53	869	747092744	XP_011094151.1	781	1.7e-80	beta-glucosidase isoform X1 [Sesamum indicum]	XM_023032443.1	XM_023032443	41	1.6e-09	PREDICTED: Olea europaea var. sylvestris beta-glucosidase-like (LOC111403819), mRNA	K12695	RG	raucaffricine beta-D-glucosidase / vomilenine glucosyltransferase [EC:3.2.1.125 2.4.1.219]	http://www.genome.jp/dbget-bin/www_bget?ko:K12695	Q8GVD0	555	1.1e-55	Oleuropein beta-glucosidase OS=Olea europaea OX=4146 GN=GLU PE=1 SV=1	PF00232	Glycosyl hydrolase family 1	GO:0005975	carbohydrate metabolic process	GO:0004553	hydrolase activity, hydrolyzing O-glycosyl compounds	--	--	--	--	FALSE	0.567723	0.435717	FALSE	0.209686	0.900665	FALSE	0.666626	0.227426	FALSE	1.16197	0.0301076	FALSE	1.32163
Cluster-11149.14166	RgUGT8	6.97	19.35	12.14	6.25	2.78	1829	747055185	XP_011073829.1	2010	1.1e-222	UDP-glycosyltransferase 92A1-like [Sesamum indicum]	XM_011075527.2	XM_011075527	595	0	PREDICTED: Sesamum indicum UDP-glycosyltransferase 92A1-like (LOC105158689), mRNA	-	-	-	http://www.genome.jp/dbget-bin/www_bget?ko:-	Q6WFW1	938	8.6e-100	Crocetin glucosyltransferase 3 OS=Crocus sativus OX=82528 GN=GLT3 PE=1 SV=1	PF05399//PF00201//PF05969//PF08043//PF02544//PF04101	Ectropic viral integration site 2A protein (EVI2A)//UDP-glucoronosyl and UDP-glucosyl transferase//Photosystem II complex subunit Ycf12//Xin repeat//3-oxo-5-alpha-steroid 4-dehydrogenase//Glycosyltransferase family 28 C-terminal domain	GO:0006629//GO:0015979//GO:0030036	lipid metabolic process//photosynthesis//actin cytoskeleton organization	GO:0016758//GO:0016627//GO:0003779	transferase activity, transferring hexosyl groups//oxidoreductase activity, acting on the CH-CH group of donors//actin binding	GO:0030054//GO:0016021//GO:0009523	cell junction//integral component of membrane//photosystem II	--	--	UP	1.83173	0.000323626	FALSE	0.772665	0.270468	UP	2.49353	4.31e-07	FALSE	0.830873	0.193286	UP	1.55332
Cluster-11149.29325		10.89	29.84	49.96	6.03	17	2418	747081244	XP_011087901.1	1420	3.9e-154	7-deoxyloganetin glucosyltransferase-like [Sesamum indicum]	XM_023005462.1	XM_023005462	331	2.82e-170	PREDICTED: Olea europaea var. sylvestris 7-deoxyloganetin glucosyltransferase-like (LOC111381661), mRNA	K21374	-	-	http://www.genome.jp/dbget-bin/www_bget?ko:K21374	F8WKW1	993	4.8e-106	7-deoxyloganetin glucosyltransferase OS=Gardenia jasminoides OX=114476 GN=UGT85A24 PE=1 SV=1	PF00201	UDP-glucoronosyl and UDP-glucosyl transferase	--	--	GO:0016758	transferase activity, transferring hexosyl groups	--	--	--	--	UP	2.50788	2.83e-07	DOWN	-1.89121	0.000159309	FALSE	0.505872	0.405112	UP	1.52821	0.00331806	FALSE	-0.412949
Cluster-11149.35972		2.4	3.73	6.73	11.56	18.52	1714	747060635	XP_011076757.1	2019	9.5e-224	7-deoxyloganetic acid glucosyltransferase-like [Sesamum indicum]	XM_011078455.2	XM_011078455	631	0	PREDICTED: Sesamum indicum 7-deoxyloganetic acid glucosyltransferase-like (LOC105160927), mRNA	K21373	-	-	http://www.genome.jp/dbget-bin/www_bget?ko:K21373	U3U992	1387	7e-152	7-deoxyloganetic acid glucosyltransferase OS=Catharanthus roseus OX=4058 GN=UGT709C2 PE=1 SV=1	PF00201	UDP-glucoronosyl and UDP-glucosyl transferase	--	--	GO:0016758	transferase activity, transferring hexosyl groups	--	--	--	--	FALSE	-1.42852	0.00985796	FALSE	-1.07613	0.0553604	DOWN	-2.6152	8.93e-08	DOWN	-1.59202	0.00348378	DOWN	-2.71783
Cluster-11149.45062		0.6	0.2	0.2	6.7	4.11	895	1276252563	PIN10984.1	1144	1.4e-122	UDP-glucuronosyl and UDP-glucosyl transferase [Handroanthus impetiginosus]	XM_011094127.2	XM_011094127	282	1.77e-143	PREDICTED: Sesamum indicum 7-deoxyloganetin glucosyltransferase-like (LOC105172611), mRNA	K21374	-	-	http://www.genome.jp/dbget-bin/www_bget?ko:K21374	F8WKW1	965	3.1e-103	7-deoxyloganetin glucosyltransferase OS=Gardenia jasminoides OX=114476 GN=UGT85A24 PE=1 SV=1	--	--	--	--	--	--	--	--	--	--	DOWN	-4.77186	3.27e-09	FALSE	0.30666	0.825265	DOWN	-4.56556	1.13e-08	DOWN	-2.81007	7.16e-05	DOWN	-2.55072
Cluster-11149.41286		13.48	6.27	8.56	7.88	18.81	1839	1276244817	PIN05078.1	2084	3e-231	UDP-glucuronosyl and UDP-glucosyl transferase [Handroanthus impetiginosus]	XM_012972995.1	XM_012972995	449	0	PREDICTED: Erythranthe guttatus 7-deoxyloganetin glucosyltransferase-like (LOC105949678), mRNA	K21374	-	-	http://www.genome.jp/dbget-bin/www_bget?ko:K21374	F8WKW1	1477	2.7e-162	7-deoxyloganetin glucosyltransferase OS=Gardenia jasminoides OX=114476 GN=UGT85A24 PE=1 SV=1	PF00201//PF15056	UDP-glucoronosyl and UDP-glucosyl transferase//Neuritin protein family	GO:0007399	nervous system development	GO:0016758	transferase activity, transferring hexosyl groups	--	--	--	--	FALSE	-0.127064	1	DOWN	-1.65155	0.0012234	DOWN	-1.8893	9.79e-05	FALSE	1.4493	0.00586613	FALSE	-0.252208
Cluster-11149.41285		7.94	6.65	12.33	1.06	31.13	1686	1276244817	PIN05078.1	926	5.1e-97	UDP-glucuronosyl and UDP-glucosyl transferase [Handroanthus impetiginosus]	XM_023005455.1	XM_023005455	232	2.11e-115	PREDICTED: Olea europaea var. sylvestris 7-deoxyloganetin glucosyltransferase-like (LOC111381652), mRNA	K21374	-	-	http://www.genome.jp/dbget-bin/www_bget?ko:K21374	F8WKW1	637	6.4e-65	7-deoxyloganetin glucosyltransferase OS=Gardenia jasminoides OX=114476 GN=UGT85A24 PE=1 SV=1	PF00201	UDP-glucoronosyl and UDP-glucosyl transferase	--	--	GO:0016758	transferase activity, transferring hexosyl groups	--	--	--	--	UP	2.84844	1.95e-07	DOWN	-5.26744	7.2e-21	DOWN	-2.52991	1.39e-07	UP	3.57279	4.84e-11	DOWN	-1.74416
Cluster-11149.30453		11.89	9.54	7.54	12.8	10.96	1796	848869420	XP_012835335.1	272	3.8e-21	PREDICTED: 7-deoxyloganetin glucosyltransferase-like [Erythranthe guttata]	XM_011103287.2	XM_011103287	97	2.51e-40	PREDICTED: Sesamum indicum probable acyl-activating enzyme 16, chloroplastic (LOC105179650), mRNA	K21374	-	-	http://www.genome.jp/dbget-bin/www_bget?ko:K21374	F8WKW1	221	1.2e-16	7-deoxyloganetin glucosyltransferase OS=Gardenia jasminoides OX=114476 GN=UGT85A24 PE=1 SV=1	PF06608//PF02228//PF07487//PF06816	Protein of unknown function (DUF1143)//Major core protein p19//SopE GEF domain//NOTCH protein	GO:0030154//GO:0009405//GO:0043087//GO:0090630//GO:0031532	cell differentiation//pathogenesis//regulation of GTPase activity//activation of GTPase activity//actin cytoskeleton reorganization	GO:0005198//GO:0005085	structural molecule activity//guanyl-nucleotide exchange factor activity	GO:0005634//GO:0016021//GO:0019013	nucleus//integral component of membrane//viral nucleocapsid	--	--	FALSE	-0.222351	0.938759	FALSE	-0.172991	0.958517	FALSE	-0.506072	0.424467	FALSE	0.566757	0.442645	FALSE	0.343757
Cluster-12148.0		0.04	0.45	1.27	0.04	0.13	1225	1552228507	RVW78327.1	748	1.6e-76	7-deoxyloganetin glucosyltransferase [Vitis vinifera]	XR_002901778.1	XR_002901778	64	3.74e-22	PREDICTED: Morus notabilis uncharacterized LOC21412495 (LOC21412495), ncRNA	-	-	-	http://www.genome.jp/dbget-bin/www_bget?ko:-	Q94HW2	611	4.8e-62	Retrovirus-related Pol polyprotein from transposon RE1 OS=Arabidopsis thaliana OX=3702 GN=RE1 PE=2 SV=1	--	--	--	--	--	--	--	--	--	--	FALSE	3.41766	0.0690122	FALSE	-1.86689	0.909352	FALSE	1.43157	0.353272	FALSE	0.605157	1	FALSE	-1.28478
Cluster-11149.45469		0.55	0.68	0.74	4.2	4.93	1796	604335175	EYU39133.1	1727	7.2e-190	hypothetical protein MIMGU_mgv1a021775mg [Erythranthe guttata]	XM_017363533.1	XM_017363533	44	7.27e-11	PREDICTED: Daucus carota subsp. sativus 7-deoxyloganetin glucosyltransferase-like (LOC108196300), mRNA	K21374	-	-	http://www.genome.jp/dbget-bin/www_bget?ko:K21374	F8WKW1	1479	1.6e-162	7-deoxyloganetin glucosyltransferase OS=Gardenia jasminoides OX=114476 GN=UGT85A24 PE=1 SV=1	PF00201	UDP-glucoronosyl and UDP-glucosyl transferase	--	--	GO:0016758	transferase activity, transferring hexosyl groups	--	--	--	--	DOWN	-2.41238	5.35e-05	FALSE	-0.624995	0.395812	DOWN	-3.14689	1.59e-08	DOWN	-2.2601	0.000269097	DOWN	-2.93379
Cluster-11149.4186		1.57	0.94	2.27	3.9	18.09	1141	1276252563	PIN10984.1	1205	1.5e-129	UDP-glucuronosyl and UDP-glucosyl transferase [Handroanthus impetiginosus]	XM_022897219.1	XM_022897219	126	1.19e-56	PREDICTED: Durio zibethinus 7-deoxyloganetin glucosyltransferase-like (LOC111301503), mRNA	K21374	-	-	http://www.genome.jp/dbget-bin/www_bget?ko:K21374	Q6VAB3	981	5.5e-105	UDP-glycosyltransferase 85A8 OS=Stevia rebaudiana OX=55670 GN=UGT85A8 PE=2 SV=1	PF00201	UDP-glucoronosyl and UDP-glucosyl transferase	--	--	GO:0016758	transferase activity, transferring hexosyl groups	--	--	--	--	FALSE	-1.84162	0.00696656	DOWN	-2.60955	3.97e-07	DOWN	-4.56035	1.16e-15	FALSE	-0.643233	0.524794	DOWN	-3.30183
Cluster-11149.41629		8.61	2.92	7.96	8.48	41.05	1336	1276252563	PIN10984.1	1923	1e-212	UDP-glucuronosyl and UDP-glucosyl transferase [Handroanthus impetiginosus]	XM_011094127.2	XM_011094127	514	0	PREDICTED: Sesamum indicum 7-deoxyloganetin glucosyltransferase-like (LOC105172611), mRNA	K21374	-	-	http://www.genome.jp/dbget-bin/www_bget?ko:K21374	F8WKW1	1677	1.3e-185	7-deoxyloganetin glucosyltransferase OS=Gardenia jasminoides OX=114476 GN=UGT85A24 PE=1 SV=1	PF04101//PF08150//PF00201	Glycosyltransferase family 28 C-terminal domain//FerB (NUC096) domain//UDP-glucoronosyl and UDP-glucosyl transferase	--	--	GO:0016758	transferase activity, transferring hexosyl groups	GO:0016021	integral component of membrane	--	--	FALSE	-1.33271	0.0250868	DOWN	-2.67175	5.56e-08	DOWN	-4.11484	8.25e-16	FALSE	0.693713	0.327272	DOWN	-2.02788
Cluster-11149.12376		7.76	6.46	5.21	11.85	7.75	1810	747060637	XP_011076758.1	2074	4.2e-230	7-deoxyloganetic acid glucosyltransferase-like [Sesamum indicum]	XM_013003255.1	XM_013003255	657	0	PREDICTED: Erythranthe guttatus 7-deoxyloganetic acid glucosyltransferase-like (LOC105977866), mRNA	K21373	-	-	http://www.genome.jp/dbget-bin/www_bget?ko:K21373	U5NH37	1533	8.7e-169	7-deoxyloganetic acid glucosyl transferase OS=Catharanthus roseus OX=4058 GN=7DLGT PE=1 SV=1	PF00201	UDP-glucoronosyl and UDP-glucosyl transferase	--	--	GO:0016758	transferase activity, transferring hexosyl groups	--	--	--	--	FALSE	-0.671407	0.353329	FALSE	0.215482	0.908935	FALSE	-0.566619	0.351402	FALSE	0.0643472	1	FALSE	0.229818
Cluster-11149.22731		1.73	3.41	1.31	5	4.58	1424	747081248	XP_011087903.1	1680	1.6e-184	LOW QUALITY PROTEIN: 7-deoxyloganetin glucosyltransferase-like [Sesamum indicum]	XM_027305903.1	XM_027305903	195	6.58e-95	PREDICTED: Coffea eugenioides 7-deoxyloganetin glucosyltransferase-like (LOC113762447), mRNA	K21374	-	-	http://www.genome.jp/dbget-bin/www_bget?ko:K21374	F8WKW1	1255	1.2e-136	7-deoxyloganetin glucosyltransferase OS=Gardenia jasminoides OX=114476 GN=UGT85A24 PE=1 SV=1	PF00201	UDP-glucoronosyl and UDP-glucosyl transferase	--	--	GO:0016758	transferase activity, transferring hexosyl groups	--	--	--	--	FALSE	-0.346852	0.834263	FALSE	-0.271237	0.845524	FALSE	-0.728653	0.252057	FALSE	-0.853404	0.239096	FALSE	-1.17425
Cluster-11149.23607	RgUGT9	9.44	8.21	18.63	0.37	1.05	2208	747075857	XP_011084978.1	2139	1.5e-237	7-deoxyloganetic acid glucosyltransferase-like [Sesamum indicum]	XM_011086676.2	XM_011086676	745	0	PREDICTED: Sesamum indicum 7-deoxyloganetic acid glucosyltransferase-like (LOC105167101), mRNA	K21373	-	-	http://www.genome.jp/dbget-bin/www_bget?ko:K21373	U5NH37	1613	5.6e-178	7-deoxyloganetic acid glucosyl transferase OS=Catharanthus roseus OX=4058 GN=7DLGT PE=1 SV=1	PF00201	UDP-glucoronosyl and UDP-glucosyl transferase	--	--	GO:0016758	transferase activity, transferring hexosyl groups	--	--	--	--	UP	4.67712	9.64e-16	FALSE	-1.91325	0.0070673	UP	2.65241	2.76e-07	UP	5.35063	8.28e-20	UP	3.38752
Cluster-11149.45025		0.03	0.03	0.19	2.02	3.66	1674	848923954	XP_012858201.1	1991	1.6e-220	PREDICTED: 7-deoxyloganetin glucosyltransferase-like [Erythranthe guttata]	XM_013003088.1	XM_013003088	433	0	PREDICTED: Erythranthe guttatus 7-deoxyloganetin glucosyltransferase-like (LOC105977727), mRNA	K21374	-	-	http://www.genome.jp/dbget-bin/www_bget?ko:K21374	F8WKW1	1908	2.6e-212	7-deoxyloganetin glucosyltransferase OS=Gardenia jasminoides OX=114476 GN=UGT85A24 PE=1 SV=1	PF00201	UDP-glucoronosyl and UDP-glucosyl transferase	--	--	GO:0016758	transferase activity, transferring hexosyl groups	--	--	--	--	DOWN	-5.671	8.44e-09	FALSE	-1.2545	0.0385507	DOWN	-7.00685	1.06e-15	DOWN	-5.27884	3.56e-07	DOWN	-6.5573
Cluster-11149.43074		5.36	1.26	0.82	4.49	3.16	942	1276244817	PIN05078.1	1116	2.7e-119	UDP-glucuronosyl and UDP-glucosyl transferase [Handroanthus impetiginosus]	XM_012972995.1	XM_012972995	253	2.46e-127	PREDICTED: Erythranthe guttatus 7-deoxyloganetin glucosyltransferase-like (LOC105949678), mRNA	K21374	-	-	http://www.genome.jp/dbget-bin/www_bget?ko:K21374	F8WKW1	805	1.2e-84	7-deoxyloganetin glucosyltransferase OS=Gardenia jasminoides OX=114476 GN=UGT85A24 PE=1 SV=1	PF00201	UDP-glucoronosyl and UDP-glucosyl transferase	--	--	GO:0016758	transferase activity, transferring hexosyl groups	--	--	--	--	FALSE	-1.62008	0.0237031	FALSE	0.106482	1	FALSE	-1.62303	0.0181964	FALSE	0.924588	0.185273	FALSE	0.980832
Cluster-11149.35541		0.26	1.8	1.75	1.02	2.85	416	747081248	XP_011087903.1	446	5.8e-42	LOW QUALITY PROTEIN: 7-deoxyloganetin glucosyltransferase-like [Sesamum indicum]	XM_025111317.1	XM_025111317	45	4.39e-12	PREDICTED: Cynara cardunculus var. scolymus UDP-glycosyltransferase 85A8-like (LOC112506964), mRNA	K21374	-	-	http://www.genome.jp/dbget-bin/www_bget?ko:K21374	Q6VAB3	348	5.1e-32	UDP-glycosyltransferase 85A8 OS=Stevia rebaudiana OX=55670 GN=UGT85A8 PE=2 SV=1	PF00201	UDP-glucoronosyl and UDP-glucosyl transferase	--	--	GO:0016758	transferase activity, transferring hexosyl groups	--	--	--	--	FALSE	1.04611	0.797715	FALSE	-1.84724	0.205599	FALSE	-0.910471	0.505427	FALSE	-1.2428	0.942231	FALSE	-3.11372
Cluster-20193.0		0.05	0.1	0.2	0.67	0.54	1135	1552228507	RVW78327.1	951	4.4e-100	7-deoxyloganetin glucosyltransferase [Vitis vinifera]	--	--	--	--	--	-	-	-	http://www.genome.jp/dbget-bin/www_bget?ko:-	Q94HW2	870	4.1e-92	Retrovirus-related Pol polyprotein from transposon RE1 OS=Arabidopsis thaliana OX=3702 GN=RE1 PE=2 SV=1	--	--	--	--	--	--	--	--	--	--	FALSE	-2.47773	0.0881244	FALSE	-0.0759679	1	FALSE	-2.65033	0.0735144	FALSE	-3.01146	0.148189	FALSE	-3.11372
Cluster-6074.0		0	0	0	0	3.14	566	848869420	XP_012835335.1	483	4e-46	PREDICTED: 7-deoxyloganetin glucosyltransferase-like [Erythranthe guttata]	--	--	--	--	--	K21374	-	-	http://www.genome.jp/dbget-bin/www_bget?ko:K21374	Q9LMF0	379	1.8e-35	UDP-glycosyltransferase 85A5 OS=Arabidopsis thaliana OX=3702 GN=UGT85A5 PE=2 SV=1	--	--	--	--	--	--	--	--	--	--	FALSE	-5.13e-15	1	DOWN	-7.75813	3.28e-05	DOWN	-7.67279	2.56e-05	FALSE	0	1	DOWN	-7.43324
Cluster-11149.24953		1550.08	838.1	1415.17	2352.09	1941.69	585	1445360485	RDX60741.1	973	6.4e-103	Polyubiquitin 4, partial [Mucuna pruriens]	X67957.1	X67957	369	0	A.majus mRNA for ubiquitin (partial)	K08770	UBC	ubiquitin C	http://www.genome.jp/dbget-bin/www_bget?ko:K08770	P0CH33	973	2.4e-104	Polyubiquitin 11 OS=Arabidopsis thaliana OX=3702 GN=UBQ11 PE=2 SV=1	PF00240//PF14560//PF06427//PF04452	Ubiquitin family//Ubiquitin-like domain//UDP-glucose:Glycoprotein Glucosyltransferase//RNA methyltransferase	GO:0006364//GO:0006486	rRNA processing//protein glycosylation	GO:0005515//GO:0008168//GO:0003980	protein binding//methyltransferase activity//UDP-glucose:glycoprotein glucosyltransferase activity	--	--	KOG0001	Ubiquitin and ubiquitin-like proteins	FALSE	-1.26712	0.0167985	FALSE	-0.123222	1	DOWN	-1.50112	0.00166639	FALSE	0.0596869	1	FALSE	-0.113543
Cluster-11149.12832		3.45	5	4.48	4.16	3.66	4542	747090854	XP_011093135.1	1288	1.5e-138	SKP1-like protein 21 isoform X2 [Sesamum indicum]	XM_011094833.2	XM_011094833	842	0	PREDICTED: Sesamum indicum SKP1-like protein 21 (LOC105173164), transcript variant X3, mRNA	-	-	-	http://www.genome.jp/dbget-bin/www_bget?ko:-	Q8LF97	943	5.6e-100	SKP1-like protein 21 OS=Arabidopsis thaliana OX=3702 GN=ASK21 PE=2 SV=1	PF01466//PF03931//PF04922	Skp1 family, dimerisation domain//Skp1 family, tetramerisation domain//DIE2/ALG10 family	GO:0006511//GO:0006488	ubiquitin-dependent protein catabolic process//dolichol-linked oligosaccharide biosynthetic process	GO:0106073	dolichyl pyrophosphate Glc2Man9GlcNAc2 alpha-1,2-glucosyltransferase activity	--	--	--	--	FALSE	0.46364	0.583542	FALSE	-0.212361	0.908935	FALSE	0.140514	0.92366	FALSE	0.406563	0.680441	FALSE	0.144205
Cluster-11149.20831		6	8.22	5.27	9.1	8.29	1942	747103821	XP_011100116.1	2097	9.7e-233	probable dolichyl pyrophosphate Man9GlcNAc2 alpha-1,3-glucosyltransferase [Sesamum indicum]	XM_011101814.2	XM_011101814	956	0	PREDICTED: Sesamum indicum probable dolichyl pyrophosphate Man9GlcNAc2 alpha-1,3-glucosyltransferase (LOC105178349), mRNA	K03848	ALG6	alpha-1,3-glucosyltransferase	http://www.genome.jp/dbget-bin/www_bget?ko:K03848	Q9FF17	1485	3.4e-163	Probable dolichyl pyrophosphate Man9GlcNAc2 alpha-1,3-glucosyltransferase OS=Arabidopsis thaliana OX=3702 GN=At5g38460 PE=2 SV=1	PF03155	ALG6, ALG8 glycosyltransferase family	--	--	GO:0016758	transferase activity, transferring hexosyl groups	GO:0005789	endoplasmic reticulum membrane	KOG2575	Glucosyltransferase - Alg6p	FALSE	0.0559176	1	FALSE	-0.26153	0.830424	FALSE	-0.316347	0.686633	FALSE	0.0743924	1	FALSE	-0.237104
Cluster-11149.10497		1.31	4.06	1.77	35.31	13.92	1900	1276271137	PIN26572.1	1324	4.1e-143	UDP-glucuronosyl and UDP-glucosyl transferase [Handroanthus impetiginosus]	XM_009776711.1	XM_009776711	86	3.46e-34	PREDICTED: Nicotiana sylvestris crocetin glucoside glucosyltransferase-like (LOC104224973), mRNA	K21354	-	-	http://www.genome.jp/dbget-bin/www_bget?ko:K21354	F8WKW8	1088	3.6e-117	Beta-D-glucosyl crocetin beta-1,6-glucosyltransferase OS=Gardenia jasminoides OX=114476 GN=UGT94E5 PE=1 SV=1	PF04101//PF00201//PF03033	Glycosyltransferase family 28 C-terminal domain//UDP-glucoronosyl and UDP-glucosyl transferase//Glycosyltransferase family 28 N-terminal domain	GO:0030259//GO:0005975	lipid glycosylation//carbohydrate metabolic process	GO:0016758	transferase activity, transferring hexosyl groups	--	--	--	--	DOWN	-2.91872	3.59e-09	FALSE	0.946015	0.0967728	DOWN	-2.0833	2.14e-05	DOWN	-4.07723	5.61e-15	DOWN	-3.18072
Cluster-11149.9334		3.04	1.46	0.89	0	0	1243	747070459	XP_011082054.1	1644	2.1e-180	UDP-glycosyltransferase 74E2-like [Sesamum indicum]	XM_011083752.2	XM_011083752	491	0	PREDICTED: Sesamum indicum UDP-glycosyltransferase 74E2-like (LOC105164921), mRNA	K13691	SGT1	pathogen-inducible salicylic acid glucosyltransferase	http://www.genome.jp/dbget-bin/www_bget?ko:K13691	Q9SYK9	1000	3.8e-107	UDP-glycosyltransferase 74E2 OS=Arabidopsis thaliana OX=3702 GN=UGT74E2 PE=1 SV=1	PF04647//PF00201//PF03460//PF04101	Accessory gene regulator B//UDP-glucoronosyl and UDP-glucosyl transferase//Nitrite/Sulfite reductase ferredoxin-like half domain//Glycosyltransferase family 28 C-terminal domain	GO:0009405//GO:0055114//GO:0009372	pathogenesis//oxidation-reduction process//quorum sensing	GO:0008233//GO:0016758//GO:0016491	peptidase activity//transferase activity, transferring hexosyl groups//oxidoreductase activity	GO:0016021	integral component of membrane	--	--	UP	8.18733	1.13e-06	FALSE	0	1	UP	7.92098	4.15e-06	UP	9.53096	4.8e-12	UP	9.25804
Cluster-11149.31562		1.27	2.52	2.96	2.63	3.38	1054	747057898	XP_011075272.1	657	5e-66	beta-D-glucosyl crocetin beta-1,6-glucosyltransferase-like [Sesamum indicum]	XM_012978904.1	XM_012978904	158	1.78e-74	PREDICTED: Erythranthe guttatus beta-D-glucosyl crocetin beta-1,6-glucosyltransferase-like (LOC105955200), mRNA	K21354	-	-	http://www.genome.jp/dbget-bin/www_bget?ko:K21354	F8WKW8	438	4.7e-42	Beta-D-glucosyl crocetin beta-1,6-glucosyltransferase OS=Gardenia jasminoides OX=114476 GN=UGT94E5 PE=1 SV=1	PF03033	Glycosyltransferase family 28 N-terminal domain	GO:0030259//GO:0005975	lipid glycosylation//carbohydrate metabolic process	GO:0016758	transferase activity, transferring hexosyl groups	--	--	--	--	FALSE	0.143244	1	FALSE	-0.7557	0.357601	FALSE	-0.722864	0.314271	FALSE	-0.378277	0.841577	FALSE	-1.1831
Cluster-11149.19593		9.61	13.95	10	26.29	15.75	6302	747088519	XP_011091852.1	4102	0	E3 ubiquitin-protein ligase KEG [Sesamum indicum]	XM_011093550.2	XM_011093550	1711	0	PREDICTED: Sesamum indicum E3 ubiquitin-protein ligase KEG (LOC105172188), mRNA	K16279	KEG	E3 ubiquitin-protein ligase KEG [EC:2.7.11.1 2.3.2.27]	http://www.genome.jp/dbget-bin/www_bget?ko:K16279	Q9FY48	3553	0	E3 ubiquitin-protein ligase KEG OS=Arabidopsis thaliana OX=3702 GN=KEG PE=1 SV=2	PF09198//PF00023//PF02211//PF04810//PF07714//PF13606//PF00097//PF00069//PF01336//PF02237	Bacteriophage T4 beta-glucosyltransferase//Ankyrin repeat//Nitrile hydratase beta subunit//Sec23/Sec24 zinc finger//Protein tyrosine and serine/threonine kinase//Ankyrin repeat//Zinc finger, C3HC4 type (RING finger)//Protein kinase domain//OB-fold nucleic acid binding domain//Biotin protein ligase C terminal domain	GO:0006568//GO:0006888//GO:0006886//GO:0099018//GO:0006468//GO:0006464//GO:0042207//GO:0018874	tryptophan metabolic process//endoplasmic reticulum to Golgi vesicle-mediated transport//intracellular protein transport//restriction-modification system evasion by virus//protein phosphorylation//cellular protein modification process//styrene catabolic process//benzoate metabolic process	GO:0005515//GO:0018822//GO:0046872//GO:0005524//GO:0003676//GO:0008270//GO:0004672//GO:0033821	protein binding//nitrile hydratase activity//metal ion binding//ATP binding//nucleic acid binding//zinc ion binding//protein kinase activity//DNA beta-glucosyltransferase activity	GO:0030127	COPII vesicle coat	--	--	FALSE	-0.715383	0.26997	FALSE	0.343604	0.710553	FALSE	-0.482552	0.431376	FALSE	-0.774181	0.209619	FALSE	-0.480579
Cluster-10854.0		0	1.15	3.76	0	0	318	1371506446	PSS02690.1	262	9.6e-21	Scopoletin glucosyltransferase [Actinidia chinensis var. chinensis]	--	--	--	--	--	-	-	-	http://www.genome.jp/dbget-bin/www_bget?ko:-	Q2V6J9	219	3.5e-17	UDP-glucose flavonoid 3-O-glucosyltransferase 7 OS=Fragaria ananassa OX=3747 GN=GT7 PE=1 SV=1	--	--	--	--	--	--	--	--	--	--	FALSE	4.21768	0.835728	FALSE	0	1	FALSE	3.96602	0.705108	FALSE	0	1	FALSE	0
Cluster-11149.11967		0.11	0.35	0.35	0.23	0.57	626	1276254932	PIN12889.1	226	2.8e-16	Sterol 3-beta-glucosyltransferase [Handroanthus impetiginosus]	XM_012972979.1	XM_012972979	79	8.54e-31	PREDICTED: Erythranthe guttatus sterol 3-beta-glucosyltransferase (LOC105949662), transcript variant X3, mRNA	-	-	-	http://www.genome.jp/dbget-bin/www_bget?ko:-	Q5A950	137	2.2e-07	Sterol 3-beta-glucosyltransferase OS=Candida albicans (strain SC5314 / ATCC MYA-2876) OX=237561 GN=ATG26 PE=3 SV=2	--	--	--	--	--	--	--	--	--	--	FALSE	0.80731	1	FALSE	-1.67724	0.622538	FALSE	-0.976509	0.92366	FALSE	-0.295279	1	FALSE	-1.99688
Cluster-11149.13227		0.6	1.38	0.99	2.74	1.13	823	--	--	--	--	--	XM_020694623.1	XM_020694623	64	2.48e-22	PREDICTED: Sesamum indicum sterol 3-beta-glucosyltransferase UGT80A2-like (LOC105163501), transcript variant X3, mRNA	--	--	--	--	--	--	--	--	--	--	--	--	--	--	--	--	--	--	FALSE	-0.771851	0.524743	FALSE	0.87326	0.446034	FALSE	-0.00842414	1	FALSE	-1.51893	0.129594	FALSE	-0.694284
Cluster-11149.42763		2.31	2.57	1.73	7.85	2.05	1551	604299756	EYU19599.1	1497	2.9e-163	hypothetical protein MIMGU_mgv1a006327mg [Erythranthe guttata]	XM_013002604.1	XM_013002604	468	0	PREDICTED: Erythranthe guttatus chalcone 4'-O-glucosyltransferase-like (LOC105977300), mRNA	-	-	-	http://www.genome.jp/dbget-bin/www_bget?ko:-	Q33DV3	1207	4.7e-131	Chalcone 4'-O-glucosyltransferase OS=Antirrhinum majus OX=4151 PE=1 SV=1	PF04101//PF00201	Glycosyltransferase family 28 C-terminal domain//UDP-glucoronosyl and UDP-glucosyl transferase	--	--	GO:0016758	transferase activity, transferring hexosyl groups	--	--	--	--	FALSE	-1.40568	0.0164779	FALSE	1.53839	0.00721309	FALSE	0.0221687	1	FALSE	-1.0888	0.083688	FALSE	0.399426
Cluster-11149.47645		0.3	0.07	0.1	2.5	15.06	1516	1585709959	XP_028051652.1	1373	6.8e-149	UDP-glycosyltransferase 75C1-like [Camellia sinensis]	KP772225.1	KP772225	50	2.82e-14	Paeonia lutea 5-glucosyltransferase 1 (UF5GT1) mRNA, partial cds	-	-	-	http://www.genome.jp/dbget-bin/www_bget?ko:-	K4CWS6	1254	1.6e-136	UDP-glycosyltransferase 75C1 OS=Solanum lycopersicum OX=4081 GN=UGT75C1 PE=1 SV=1	PF00201//PF04101	UDP-glucoronosyl and UDP-glucosyl transferase//Glycosyltransferase family 28 C-terminal domain	--	--	GO:0016758	transferase activity, transferring hexosyl groups	--	--	--	--	DOWN	-4.88783	8.02e-08	DOWN	-2.98459	6.8e-09	DOWN	-7.96765	4.65e-26	DOWN	-2.36724	0.00123092	DOWN	-5.39855
Cluster-11149.4557		0.19	0	0	14.1	45.46	1160	1276264197	PIN20634.1	412	1.4e-37	Beta-glucosidase, lactase phlorizinhydrolase [Handroanthus impetiginosus]	XM_011083310.2	XM_011083310	70	1.64e-25	PREDICTED: Sesamum indicum beta-glucosidase 24 (LOC105164618), mRNA	K12695	RG	raucaffricine beta-D-glucosidase / vomilenine glucosyltransferase [EC:3.2.1.125 2.4.1.219]	http://www.genome.jp/dbget-bin/www_bget?ko:K12695	Q8GVD0	383	1.2e-35	Oleuropein beta-glucosidase OS=Olea europaea OX=4146 GN=GLU PE=1 SV=1	--	--	--	--	--	--	--	--	--	--	DOWN	-11.12	1.58e-20	DOWN	-2.0859	2.47e-05	DOWN	-13.0494	5.54e-35	DOWN	-5.53251	8.26e-15	DOWN	-7.66136
Cluster-3828.0		0	0	0	0.4	3.63	355	1344084413	XP_023926267.1	350	6.6e-31	sterol 3-beta-glucosyltransferase-like [Quercus suber]	--	--	--	--	--	K05841	E2.4.1.173	sterol 3beta-glucosyltransferase	http://www.genome.jp/dbget-bin/www_bget?ko:K05841	A2QNQ5	385	2.2e-36	Sterol 3-beta-glucosyltransferase OS=Aspergillus niger (strain CBS 513.88 / FGSC A1513) OX=425011 GN=atg26 PE=3 SV=2	PF03033	Glycosyltransferase family 28 N-terminal domain	GO:0030259//GO:0005975	lipid glycosylation//carbohydrate metabolic process	GO:0016758	transferase activity, transferring hexosyl groups	--	--	--	--	FALSE	-3.05854	1	FALSE	-3.41842	0.0900985	FALSE	-6.33011	0.0146451	FALSE	-2.90649	1	FALSE	-6.09253
Cluster-11149.45397		0	1.96	4.24	1.35	2.73	308	1279000370	XP_022860450.1	348	9.9e-31	beta-D-glucosyl crocetin beta-1,6-glucosyltransferase-like [Olea europaea var. sylvestris]	XM_016020827.2	XM_016020827	68	5.16e-25	PREDICTED: Ziziphus jujuba beta-D-glucosyl crocetin beta-1,6-glucosyltransferase-like (LOC107412980), mRNA	K21354	-	-	http://www.genome.jp/dbget-bin/www_bget?ko:K21354	F8WKW8	312	5.6e-28	Beta-D-glucosyl crocetin beta-1,6-glucosyltransferase OS=Gardenia jasminoides OX=114476 GN=UGT94E5 PE=1 SV=1	PF03033//PF00439	Glycosyltransferase family 28 N-terminal domain//Bromodomain	GO:0005975//GO:0030259	carbohydrate metabolic process//lipid glycosylation	GO:0005515//GO:0016758	protein binding//transferase activity, transferring hexosyl groups	--	--	--	--	FALSE	0.80731	1	FALSE	-1.36283	0.794971	FALSE	-0.662548	1	FALSE	-3.80692	0.806498	FALSE	-4.9488
Cluster-11149.17685		39.79	56.86	51.95	47.87	37.09	425	848905965	XP_012852358.1	647	2.9e-65	PREDICTED: LOW QUALITY PROTEIN: anthocyanidin 3-O-glucosyltransferase 2 [Erythranthe guttata]	AB524718.1	AB524718	110	3.31e-48	Forsythia x intermedia RengUGT14 mRNA for UDP-sugar:glycosyltransferase, complete cds	-	-	-	http://www.genome.jp/dbget-bin/www_bget?ko:-	Q6VAB2	546	5.7e-55	UDP-glycosyltransferase 71E1 OS=Stevia rebaudiana OX=55670 GN=UGT71E1 PE=2 SV=1	PF00201//PF04101	UDP-glucoronosyl and UDP-glucosyl transferase//Glycosyltransferase family 28 C-terminal domain	--	--	GO:0016758	transferase activity, transferring hexosyl groups	--	--	--	--	FALSE	0.492247	0.570475	FALSE	-0.0336723	1	FALSE	0.347822	0.65052	FALSE	0.380585	0.745764	FALSE	0.296902
Cluster-11149.21490		19	11.92	16.23	41.49	49.92	1533	1340524743	XP_023742764.1	942	6.5e-99	polyubiquitin-like [Lactuca sativa]	XM_011095948.2	XM_011095948	397	0	PREDICTED: Sesamum indicum polyubiquitin-like (LOC105174002), transcript variant X1, mRNA	K08770	UBC	ubiquitin C	http://www.genome.jp/dbget-bin/www_bget?ko:K08770	P0CH33	928	1e-98	Polyubiquitin 11 OS=Arabidopsis thaliana OX=3702 GN=UBQ11 PE=2 SV=1	PF00240//PF14560//PF06427//PF04452	Ubiquitin family//Ubiquitin-like domain//UDP-glucose:Glycoprotein Glucosyltransferase//RNA methyltransferase	GO:0006486//GO:0006364	protein glycosylation//rRNA processing	GO:0005515//GO:0008168//GO:0003980	protein binding//methyltransferase activity//UDP-glucose:glycoprotein glucosyltransferase activity	--	--	KOG0001	Ubiquitin and ubiquitin-like proteins	DOWN	-1.59586	0.00193565	FALSE	-0.66364	0.315285	DOWN	-2.3702	6.26e-07	FALSE	-0.453486	0.578215	FALSE	-1.1671
Cluster-11149.31271		33.45	40.94	38.94	5.2	5.33	1847	747104443	XP_011100459.1	1902	3.8e-210	anthocyanidin 3-O-glucosyltransferase 2-like [Sesamum indicum]	XM_011102157.2	XM_011102157	450	0	PREDICTED: Sesamum indicum anthocyanidin 3-O-glucosyltransferase 2-like (LOC105178646), mRNA	-	-	-	http://www.genome.jp/dbget-bin/www_bget?ko:-	Q66PF3	1258	6.8e-137	Putative UDP-glucose flavonoid 3-O-glucosyltransferase 3 OS=Fragaria ananassa OX=3747 GN=GT3 PE=2 SV=1	PF04101//PF00201	Glycosyltransferase family 28 C-terminal domain//UDP-glucoronosyl and UDP-glucosyl transferase	--	--	GO:0016758	transferase activity, transferring hexosyl groups	--	--	--	--	UP	3.1772	1.16e-10	FALSE	-0.431682	0.632191	UP	2.63466	4.02e-08	UP	3.35737	1.13e-11	UP	2.87558
Cluster-11149.12193		4.38	2.61	2.03	1.52	1.63	1885	1276236418	PIM99394.1	207	1.4e-13	UDP-glucuronosyl and UDP-glucosyl transferase [Handroanthus impetiginosus]	--	--	--	--	--	K13495	CISZOG	cis-zeatin O-glucosyltransferase	http://www.genome.jp/dbget-bin/www_bget?ko:K13495	Q9ZSK5	150	2.1e-08	Zeatin O-glucosyltransferase OS=Phaseolus lunatus OX=3884 GN=ZOG1 PE=2 SV=1	--	--	--	--	--	--	--	--	--	--	FALSE	0.979537	0.173004	FALSE	-0.495184	0.631825	FALSE	0.373593	0.670752	UP	2.19458	5.14e-05	UP	1.64919
Cluster-11149.84		47.28	17.66	20.34	27.09	29.06	402	747092744	XP_011094151.1	407	1.9e-37	beta-glucosidase isoform X1 [Sesamum indicum]	--	--	--	--	--	K12695	RG	raucaffricine beta-D-glucosidase / vomilenine glucosyltransferase [EC:3.2.1.125 2.4.1.219]	http://www.genome.jp/dbget-bin/www_bget?ko:K12695	Q8GVD0	330	6e-30	Oleuropein beta-glucosidase OS=Olea europaea OX=4146 GN=GLU PE=1 SV=1	PF00232	Glycosyl hydrolase family 1	GO:0005975	carbohydrate metabolic process	GO:0004553	hydrolase activity, hydrolyzing O-glycosyl compounds	--	--	--	--	FALSE	-0.36541	0.826882	FALSE	-0.503342	0.576709	FALSE	-0.979201	0.101513	FALSE	1.44596	0.0105311	FALSE	0.892563
Cluster-11149.30815		5.67	6.73	6.14	16.47	13.71	3535	1173782674	XP_020547694.1	2802	0	sterol 3-beta-glucosyltransferase UGT80B1 [Sesamum indicum]	XM_020692035.1	XM_020692035	1164	0	PREDICTED: Sesamum indicum sterol 3-beta-glucosyltransferase UGT80B1 (LOC105179411), transcript variant X3, mRNA	K05841	E2.4.1.173	sterol 3beta-glucosyltransferase	http://www.genome.jp/dbget-bin/www_bget?ko:K05841	Q9XIG1	2079	8.2e-232	Sterol 3-beta-glucosyltransferase UGT80B1 OS=Arabidopsis thaliana OX=3702 GN=UGT80B1 PE=2 SV=1	PF00201//PF03033	UDP-glucoronosyl and UDP-glucosyl transferase//Glycosyltransferase family 28 N-terminal domain	GO:0030259//GO:0005975	lipid glycosylation//carbohydrate metabolic process	GO:0016758	transferase activity, transferring hexosyl groups	--	--	--	--	FALSE	-1.0908	0.0536199	FALSE	-0.131628	1	FALSE	-1.33316	0.0067413	FALSE	-0.862368	0.148189	FALSE	-1.04396
Cluster-11149.15616		3.39	3.78	5.34	4.82	11.19	3422	604347328	EYU45580.1	1730	6.2e-190	hypothetical protein MIMGU_mgv1a021692mg [Erythranthe guttata]	XM_011073175.2	XM_011073175	392	0	PREDICTED: Sesamum indicum beta-D-glucosyl crocetin beta-1,6-glucosyltransferase-like (LOC105156914), mRNA	K21354	-	-	http://www.genome.jp/dbget-bin/www_bget?ko:K21354	F8WKW8	953	2.9e-101	Beta-D-glucosyl crocetin beta-1,6-glucosyltransferase OS=Gardenia jasminoides OX=114476 GN=UGT94E5 PE=1 SV=1	PF04101//PF00046//PF00201	Glycosyltransferase family 28 C-terminal domain//Homeodomain//UDP-glucoronosyl and UDP-glucosyl transferase	--	--	GO:0003677//GO:0016758	DNA binding//transferase activity, transferring hexosyl groups	--	--	--	--	FALSE	-0.151637	1	DOWN	-1.61119	0.00160196	DOWN	-1.87353	0.000104452	FALSE	0.1705	1	DOWN	-1.49059
Cluster-11149.44986		1.58	0.99	0.63	18.38	10.74	1724	747088862	XP_011092044.1	1488	3.6e-162	hydroquinone glucosyltransferase-like [Sesamum indicum]	XM_012982933.1	XM_012982933	150	8.29e-70	PREDICTED: Erythranthe guttatus hydroquinone glucosyltransferase-like (LOC105958933), mRNA	K08237	E2.4.1.218	hydroquinone glucosyltransferase	http://www.genome.jp/dbget-bin/www_bget?ko:K08237	Q9AR73	969	2.1e-103	Hydroquinone glucosyltransferase OS=Rauvolfia serpentina OX=4060 GN=AS PE=1 SV=1	PF00201//PF04101//PF06817	UDP-glucoronosyl and UDP-glucosyl transferase//Glycosyltransferase family 28 C-terminal domain//Reverse transcriptase thumb domain	GO:0006278	RNA-dependent DNA biosynthetic process	GO:0016758//GO:0003964	transferase activity, transferring hexosyl groups//RNA-directed DNA polymerase activity	--	--	--	--	DOWN	-4.01347	1.15e-13	FALSE	0.378123	0.691226	DOWN	-3.74517	2.12e-12	DOWN	-2.86361	3.24e-08	DOWN	-2.53506
Cluster-11149.17196		3.53	3.84	2.45	4.14	2.37	2430	747054389	XP_011073399.1	3024	0	protein FAR1-RELATED SEQUENCE 6 isoform X1 [Sesamum indicum]	XM_011075099.2	XM_011075099	1049	0	PREDICTED: Sesamum indicum protein FAR1-RELATED SEQUENCE 6 (LOC105158362), transcript variant X4, mRNA	K17604	ZSWIM3	zinc finger SWIM domain-containing protein 3	http://www.genome.jp/dbget-bin/www_bget?ko:K17604	Q9SSQ4	2275	1.1e-254	Protein FAR1-RELATED SEQUENCE 6 OS=Arabidopsis thaliana OX=3702 GN=FRS6 PE=2 SV=1	PF00872//PF04434//PF09198	Transposase, Mutator family//SWIM zinc finger//Bacteriophage T4 beta-glucosyltransferase	GO:0006313//GO:0099018	transposition, DNA-mediated//restriction-modification system evasion by virus	GO:0033821//GO:0003677//GO:0008270//GO:0004803	DNA beta-glucosyltransferase activity//DNA binding//zinc ion binding//transposase activity	--	--	--	--	FALSE	0.0922417	1	FALSE	0.409611	0.672403	FALSE	0.391119	0.599895	FALSE	0.445337	0.641788	FALSE	0.804844
Cluster-11149.27117		6.52	1.87	0.55	73.05	70.91	1527	747092623	XP_011094086.1	523	2.5e-50	beta-glucosidase-like [Sesamum indicum]	XM_011095849.2	XM_011095849	145	4.41e-67	PREDICTED: Sesamum indicum beta-glucosidase (LOC105173929), transcript variant X1, mRNA	K12695	RG	raucaffricine beta-D-glucosidase / vomilenine glucosyltransferase [EC:3.2.1.125 2.4.1.219]	http://www.genome.jp/dbget-bin/www_bget?ko:K12695	Q8GVD0	418	1.4e-39	Oleuropein beta-glucosidase OS=Olea europaea OX=4146 GN=GLU PE=1 SV=1	PF00232	Glycosyl hydrolase family 1	GO:0005975	carbohydrate metabolic process	GO:0004553	hydrolase activity, hydrolyzing O-glycosyl compounds	--	--	--	--	DOWN	-5.08138	1.85e-21	FALSE	-0.353864	0.70386	DOWN	-5.54542	1.03e-24	DOWN	-2.81262	9.17e-09	DOWN	-3.21636
Cluster-11149.19092		15.9	32.7	23.11	37.28	18.54	788	848849310	XP_012830335.1	684	2.8e-69	PREDICTED: sterol 3-beta-glucosyltransferase UGT80A2-like isoform X1 [Erythranthe guttata]	XM_020694623.1	XM_020694623	335	5.33e-173	PREDICTED: Sesamum indicum sterol 3-beta-glucosyltransferase UGT80A2-like (LOC105163501), transcript variant X3, mRNA	K05841	E2.4.1.173	sterol 3beta-glucosyltransferase	http://www.genome.jp/dbget-bin/www_bget?ko:K05841	Q9M8Z7	559	3.3e-56	Sterol 3-beta-glucosyltransferase UGT80A2 OS=Arabidopsis thaliana OX=3702 GN=UGT80A2 PE=1 SV=1	PF04976//PF00201	DMSO reductase anchor subunit (DmsC)//UDP-glucoronosyl and UDP-glucosyl transferase	GO:0019645	anaerobic electron transport chain	GO:0016758	transferase activity, transferring hexosyl groups	GO:0016021	integral component of membrane	--	--	FALSE	0.0224656	1	FALSE	0.609287	0.380656	FALSE	0.52099	0.411683	FALSE	-0.562146	0.466514	FALSE	-0.00285957
Cluster-940.0		0	0	0	0	4.89	326	545713652	XP_005709129.1	228	8.6e-17	dolichyl-phosphate beta-glucosyltransferase [Galdieria sulphuraria]	--	--	--	--	--	K00729	ALG5	dolichyl-phosphate beta-glucosyltransferase	http://www.genome.jp/dbget-bin/www_bget?ko:K00729	Q54J42	172	1e-11	Dolichyl-phosphate beta-glucosyltransferase OS=Dictyostelium discoideum OX=44689 GN=alg5 PE=2 SV=1	--	--	--	--	--	--	--	--	KOG2977	Glycosyltransferase	FALSE	-5.13e-15	1	FALSE	-6.41483	0.0234343	FALSE	-6.33011	0.0146451	FALSE	0	1	FALSE	-6.09253
Cluster-11149.30452		4.39	8.37	11.04	15.59	6.34	5274	1173802188	XP_011080337.2	1435	1.5e-155	uncharacterized protein LOC105163620 [Sesamum indicum]	XM_012989119.1	XM_012989119	201	1.15e-97	PREDICTED: Erythranthe guttatus cis-muuroladiene synthase-like (LOC105964611), mRNA	-	-	-	http://www.genome.jp/dbget-bin/www_bget?ko:-	Q5W283	1089	7.7e-117	Cis-muuroladiene synthase OS=Mentha piperita OX=34256 PE=1 SV=1	PF09198//PF01397//PF03936//PF00501	Bacteriophage T4 beta-glucosyltransferase//Terpene synthase, N-terminal domain//Terpene synthase family, metal binding domain//AMP-binding enzyme	GO:0099018	restriction-modification system evasion by virus	GO:0003824//GO:0000287//GO:0033821//GO:0016829//GO:0010333	catalytic activity//magnesium ion binding//DNA beta-glucosyltransferase activity//lyase activity//terpene synthase activity	--	--	--	--	FALSE	-0.698928	0.291109	FALSE	0.901455	0.120183	FALSE	0.0917599	0.99903	FALSE	-1.1503	0.0349412	FALSE	-0.298845
Cluster-11149.2840		0.29	1.09	0.1	4.79	2.92	693	747050789	XP_011071477.1	583	1.3e-57	beta-D-glucosyl crocetin beta-1,6-glucosyltransferase-like [Sesamum indicum]	XM_012986462.1	XM_012986462	199	1.86e-97	PREDICTED: Erythranthe guttatus beta-D-glucosyl crocetin beta-1,6-glucosyltransferase-like (LOC105962170), mRNA	K21354	-	-	http://www.genome.jp/dbget-bin/www_bget?ko:K21354	F8WKW8	380	1.7e-35	Beta-D-glucosyl crocetin beta-1,6-glucosyltransferase OS=Gardenia jasminoides OX=114476 GN=UGT94E5 PE=1 SV=1	PF04101//PF00201	Glycosyltransferase family 28 C-terminal domain//UDP-glucoronosyl and UDP-glucosyl transferase	--	--	GO:0016758	transferase activity, transferring hexosyl groups	--	--	--	--	FALSE	-1.90962	0.0142096	FALSE	0.311321	0.908935	FALSE	-1.7066	0.0341257	DOWN	-3.33855	0.000547621	DOWN	-3.06892
Cluster-11149.9297		0.35	0	0	7.68	1.55	1689	1371506446	PSS02690.1	1247	3.1e-134	Scopoletin glucosyltransferase [Actinidia chinensis var. chinensis]	--	--	--	--	--	-	-	-	http://www.genome.jp/dbget-bin/www_bget?ko:-	Q9AT54	1092	1.1e-117	Scopoletin glucosyltransferase OS=Nicotiana tabacum OX=4097 GN=TOGT1 PE=1 SV=1	PF00201	UDP-glucoronosyl and UDP-glucosyl transferase	--	--	GO:0016758	transferase activity, transferring hexosyl groups	--	--	--	--	DOWN	-10.9082	1.75e-20	UP	1.90617	0.000564441	DOWN	-8.84572	1.69e-09	DOWN	-3.75851	8.81e-10	FALSE	-1.90066
Cluster-11149.38280		5.63	14.18	27.52	0	0.83	457	300669727	BAJ11652.1	631	2.2e-63	glucosyltransferase [Sinningia cardinalis]	XM_021455019.1	XM_021455019	44	1.75e-11	PREDICTED: Sorghum bicolor scopoletin glucosyltransferase (LOC8058213), transcript variant X6, mRNA	-	-	-	http://www.genome.jp/dbget-bin/www_bget?ko:-	Q9AT54	530	4.4e-53	Scopoletin glucosyltransferase OS=Nicotiana tabacum OX=4097 GN=TOGT1 PE=1 SV=1	PF00201	UDP-glucoronosyl and UDP-glucosyl transferase	--	--	GO:0016758	transferase activity, transferring hexosyl groups	--	--	--	--	UP	9.22785	5.68e-11	FALSE	-5.26588	0.357601	UP	3.77855	2.15e-06	UP	8.13927	4.03e-06	UP	2.91822
Cluster-11149.43205		2.4	1.42	1.2	0.21	0.55	1275	604322416	EYU32802.1	1560	1.2e-170	hypothetical protein MIMGU_mgv1a005797mg [Erythranthe guttata]	XM_020833118.2	XM_020833118	61	1.82e-20	PREDICTED: Dendrobium catenatum hydroquinone glucosyltransferase (LOC110104141), mRNA	K08237	E2.4.1.218	hydroquinone glucosyltransferase	http://www.genome.jp/dbget-bin/www_bget?ko:K08237	Q40287	907	2.4e-96	Anthocyanidin 3-O-glucosyltransferase 5 OS=Manihot esculenta OX=3983 GN=GT5 PE=2 SV=1	PF00201//PF04101	UDP-glucoronosyl and UDP-glucosyl transferase//Glycosyltransferase family 28 C-terminal domain	--	--	GO:0016758	transferase activity, transferring hexosyl groups	--	--	--	--	UP	2.9525	0.00063404	FALSE	-1.7742	0.156531	FALSE	1.06588	0.203303	UP	4.17399	5.04e-08	UP	2.35028
Cluster-11149.24190		37.46	38.84	40.8	56.4	33.38	1574	1276271105	PIN26543.1	2020	6.7e-224	UDP-glucuronosyl and UDP-glucosyl transferase [Handroanthus impetiginosus]	XM_011095228.2	XM_011095228	587	0	PREDICTED: Sesamum indicum hydroquinone glucosyltransferase (LOC105173474), mRNA	K08237	E2.4.1.218	hydroquinone glucosyltransferase	http://www.genome.jp/dbget-bin/www_bget?ko:K08237	Q9AR73	1730	1.1e-191	Hydroquinone glucosyltransferase OS=Rauvolfia serpentina OX=4060 GN=AS PE=1 SV=1	PF04893//PF03419//PF00201//PF04101	Yip1 domain//Sporulation factor SpoIIGA//UDP-glucoronosyl and UDP-glucosyl transferase//Glycosyltransferase family 28 C-terminal domain	GO:0006508//GO:0030436	proteolysis//asexual sporulation	GO:0004190//GO:0016758	aspartic-type endopeptidase activity//transferase activity, transferring hexosyl groups	GO:0016020	membrane	--	--	FALSE	-0.334955	0.774701	FALSE	0.359817	0.70386	FALSE	-0.0859085	1	FALSE	0.0828525	1	FALSE	0.392655
Cluster-11149.22921		5.46	10.16	7.8	8.79	5.48	2495	747105493	XP_011101020.1	964	3e-101	protein SEH1 [Sesamum indicum]	XM_012998828.1	XM_012998828	387	0	PREDICTED: Erythranthe guttatus hydroquinone glucosyltransferase (LOC105973781), mRNA	K14299	SEH1	nucleoporin SEH1	http://www.genome.jp/dbget-bin/www_bget?ko:K14299	Q93VR9	780	2.5e-81	Protein SEH1 OS=Arabidopsis thaliana OX=3702 GN=SEH1 PE=1 SV=1	PF00400	WD domain, G-beta repeat	--	--	GO:0005515	protein binding	--	--	KOG2445	Nuclear pore complex component (sc Seh1)	FALSE	0.410249	0.665423	FALSE	0.285748	0.79695	FALSE	0.585224	0.31748	FALSE	-0.0111669	1	FALSE	0.224568
Cluster-11149.42352		0.17	0.34	0.83	1.16	1.01	506	1023995770	KZV27323.1	642	1.3e-64	zeatin O-glucosyltransferase-like [Dorcoceras hygrometricum]	XM_008246036.1	XM_008246036	53	1.93e-16	PREDICTED: Prunus mume zeatin O-glucosyltransferase-like (LOC103342414), mRNA	K13495	CISZOG	cis-zeatin O-glucosyltransferase	http://www.genome.jp/dbget-bin/www_bget?ko:K13495	P56725	539	4.4e-54	Zeatin O-xylosyltransferase OS=Phaseolus vulgaris OX=3885 GN=ZOX1 PE=2 SV=1	PF00201	UDP-glucoronosyl and UDP-glucosyl transferase	--	--	GO:0016758	transferase activity, transferring hexosyl groups	--	--	--	--	FALSE	-1.49159	0.651408	FALSE	-0.198466	1	FALSE	-1.78806	0.517719	FALSE	-2.02706	0.378347	FALSE	-2.25363
Cluster-11149.30310		9.93	14.16	12.42	36.33	20.25	3154	848870685	XP_012835932.1	2440	2.7e-272	PREDICTED: neutral ceramidase [Erythranthe guttata]	XM_011082563.2	XM_011082563	1035	0	PREDICTED: Sesamum indicum neutral ceramidase (LOC105164019), transcript variant X1, mRNA	K12349	ASAH2	neutral ceramidase	http://www.genome.jp/dbget-bin/www_bget?ko:K12349	F4HQM3	2136	1.8e-238	Neutral ceramidase 1 OS=Arabidopsis thaliana OX=3702 GN=NCER1 PE=2 SV=1	PF09198	Bacteriophage T4 beta-glucosyltransferase	GO:0099018	restriction-modification system evasion by virus	GO:0033821	DNA beta-glucosyltransferase activity	--	--	KOG2232	Ceramidases	FALSE	-1.15873	0.034587	FALSE	0.447488	0.563275	FALSE	-0.822004	0.119047	FALSE	-1.19488	0.0257319	FALSE	-0.797379
Cluster-5282.0		0	0	0	0.24	2.22	424	1344012456	XP_023888827.1	341	8.8e-30	ceramide glucosyltransferase-like [Quercus suber]	--	--	--	--	--	--	--	--	--	G4MS28	402	2.8e-38	Ceramide glucosyltransferase OS=Magnaporthe oryzae (strain 70-15 / ATCC MYA-4617 / FGSC 8958) OX=242507 GN=MGG_10668 PE=1 SV=1	--	--	--	--	--	--	--	--	--	--	FALSE	-3.05854	1	FALSE	-3.41842	0.0900985	FALSE	-6.33011	0.0146451	FALSE	-2.90649	1	FALSE	-6.09253
Cluster-11149.33639		7.08	4.63	3.9	49.77	29.6	2300	747074817	XP_011084416.1	2457	2.1e-274	protein O-glucosyltransferase 1 isoform X1 [Sesamum indicum]	XM_011086114.2	XM_011086114	818	0	PREDICTED: Sesamum indicum protein O-glucosyltransferase 1 (LOC105166675), transcript variant X1, mRNA	-	-	-	http://www.genome.jp/dbget-bin/www_bget?ko:-	Q5E9Q1	285	5.7e-24	Protein O-glucosyltransferase 1 OS=Bos taurus OX=9913 GN=POGLUT1 PE=2 SV=1	PF03203	MerC mercury resistance protein	GO:0015694	mercury ion transport	GO:0015097	mercury ion transmembrane transporter activity	GO:0016020	membrane	--	--	DOWN	-3.22399	5.42e-11	FALSE	0.353556	0.70386	DOWN	-2.98107	6.09e-10	DOWN	-2.13913	1.3e-05	DOWN	-1.83552
Cluster-11149.7959		1.88	2.53	2.82	166.67	30.52	999	164457701	BAF96581.1	976	4.9e-103	lignan glucosyltransferase [Sesamum alatum]	XM_012996904.1	XM_012996904	80	3.87e-31	PREDICTED: Erythranthe guttatus anthocyanidin 3-O-glucosyltransferase 2 (LOC105971969), mRNA	-	-	-	http://www.genome.jp/dbget-bin/www_bget?ko:-	Q2V6K0	772	8.3e-81	UDP-glucose flavonoid 3-O-glucosyltransferase 6 OS=Fragaria ananassa OX=3747 GN=GT6 PE=1 SV=1	PF00201//PF15009	UDP-glucoronosyl and UDP-glucosyl transferase//Transmembrane protein 173	GO:0002218//GO:0032481	activation of innate immune response//positive regulation of type I interferon production	GO:0016758	transferase activity, transferring hexosyl groups	--	--	--	--	DOWN	-5.8321	4.45e-26	UP	2.05129	2.71e-05	DOWN	-3.89083	1.39e-13	DOWN	-5.79821	2.38e-25	DOWN	-3.79612
Cluster-11149.49006		0	0	0	0	2.06	816	747070455	XP_011082052.1	547	2.2e-53	UDP-glycosyltransferase 74F2-like [Sesamum indicum]	XM_023001376.1	XM_023001376	62	3.18e-21	PREDICTED: Olea europaea var. sylvestris UDP-glycosyltransferase 74F2-like (LOC111378208), mRNA	K13691	SGT1	pathogen-inducible salicylic acid glucosyltransferase	http://www.genome.jp/dbget-bin/www_bget?ko:K13691	Q6VAA6	336	2.5e-30	UDP-glycosyltransferase 74G1 OS=Stevia rebaudiana OX=55670 GN=UGT74G1 PE=1 SV=1	--	--	--	--	--	--	--	--	--	--	FALSE	-5.13e-15	1	DOWN	-7.98847	7.88e-06	DOWN	-7.90307	5.91e-06	FALSE	0	1	DOWN	-7.66333
Cluster-11149.27676		21.58	52.7	39.72	0.84	1.71	1663	747064642	XP_011078914.1	1740	2.1e-191	zeatin O-xylosyltransferase-like [Sesamum indicum]	XM_011080612.2	XM_011080612	348	6.84e-180	PREDICTED: Sesamum indicum zeatin O-xylosyltransferase-like (LOC105162555), mRNA	K13495	CISZOG	cis-zeatin O-glucosyltransferase	http://www.genome.jp/dbget-bin/www_bget?ko:K13495	Q9ZSK5	1186	1.4e-128	Zeatin O-glucosyltransferase OS=Phaseolus lunatus OX=3884 GN=ZOG1 PE=2 SV=1	PF00201	UDP-glucoronosyl and UDP-glucosyl transferase	--	--	GO:0016758	transferase activity, transferring hexosyl groups	--	--	--	--	UP	6.17346	3.3e-27	FALSE	-1.42003	0.0479348	UP	4.64215	5.58e-19	UP	5.35553	2.3e-21	UP	3.88537
Cluster-4377.0		0	0	0	0.1	1.7	1135	1344084413	XP_023926267.1	1174	6.1e-126	sterol 3-beta-glucosyltransferase-like [Quercus suber]	LT854258.1	LT854258	82	3.41e-32	Zymoseptoria tritici ST99CH_1E4 genome assembly, chromosome: ZT1E4_chr_6	K05841	E2.4.1.173	sterol 3beta-glucosyltransferase	http://www.genome.jp/dbget-bin/www_bget?ko:K05841	C4B4E5	1504	1.3e-165	Sterol 3-beta-glucosyltransferase OS=Glomerella lagenarium OX=5462 GN=ATG26 PE=3 SV=1	PF03033//PF00201	Glycosyltransferase family 28 N-terminal domain//UDP-glucoronosyl and UDP-glucosyl transferase	GO:0005975//GO:0030259	carbohydrate metabolic process//lipid glycosylation	GO:0016758	transferase activity, transferring hexosyl groups	--	--	--	--	FALSE	-3.96925	0.835728	DOWN	-4.45851	3.07e-06	DOWN	-8.27608	2.86e-07	FALSE	-3.80692	0.806498	DOWN	-8.0361
Cluster-11149.42194		17.28	3.29	7.5	6.85	9.28	566	747092744	XP_011094151.1	620	5.2e-62	beta-glucosidase isoform X1 [Sesamum indicum]	--	--	--	--	--	K12695	RG	raucaffricine beta-D-glucosidase / vomilenine glucosyltransferase [EC:3.2.1.125 2.4.1.219]	http://www.genome.jp/dbget-bin/www_bget?ko:K12695	Q8GVD0	495	6.2e-49	Oleuropein beta-glucosidase OS=Olea europaea OX=4146 GN=GLU PE=1 SV=1	PF00232	Glycosyl hydrolase family 1	GO:0005975	carbohydrate metabolic process	GO:0004553	hydrolase activity, hydrolyzing O-glycosyl compounds	--	--	--	--	FALSE	-0.829596	0.380656	FALSE	-0.836842	0.299663	DOWN	-1.77616	0.00414731	UP	1.99218	0.000415478	FALSE	1.10528
Cluster-11149.34463		0.18	0.5	0.31	0.54	0.37	957	1173815397	XP_020551732.1	271	2.6e-21	UDP-glucose:glycoprotein glucosyltransferase [Sesamum indicum]	--	--	--	--	--	K11718	HUGT	UDP-glucose:glycoprotein glucosyltransferase	http://www.genome.jp/dbget-bin/www_bget?ko:K11718	Q0WL80	153	4.8e-09	UDP-glucose:glycoprotein glucosyltransferase OS=Arabidopsis thaliana OX=3702 GN=UGGT PE=1 SV=1	PF08121	Waglerin family	GO:0007268//GO:0007165	chemical synaptic transmission//signal transduction	GO:0030550	acetylcholine receptor inhibitor activity	GO:0005576	extracellular region	--	--	FALSE	0.0926259	1	FALSE	0.15766	1	FALSE	0.140982	1	FALSE	-0.884647	0.892507	FALSE	-0.7724
Cluster-20174.0		2.8	4.2	9.36	4.82	6.52	326	--	--	--	--	--	--	--	--	--	--	--	--	--	--	--	--	--	--	PF09198	Bacteriophage T4 beta-glucosyltransferase	GO:0099018	restriction-modification system evasion by virus	GO:0033821	DNA beta-glucosyltransferase activity	--	--	--	--	FALSE	0.0926259	1	FALSE	-0.829677	0.690284	FALSE	-0.84559	0.543405	FALSE	-0.165706	1	FALSE	-1.04128
Cluster-2485.0		0	0	0	0	1.71	477	1344072075	XP_023919843.1	550	5.8e-54	uncharacterized protein LOC112031389 [Quercus suber]	XM_013488936.1	XM_013488936	36	5.11e-07	Aureobasidium subglaciale EXF-2481 glycosyltransferase family 1 protein partial mRNA	K05841	E2.4.1.173	sterol 3beta-glucosyltransferase	http://www.genome.jp/dbget-bin/www_bget?ko:K05841	Q9M8Z7	406	1.1e-38	Sterol 3-beta-glucosyltransferase UGT80A2 OS=Arabidopsis thaliana OX=3702 GN=UGT80A2 PE=1 SV=1	PF03033	Glycosyltransferase family 28 N-terminal domain	GO:0030259//GO:0005975	lipid glycosylation//carbohydrate metabolic process	GO:0016758	transferase activity, transferring hexosyl groups	--	--	--	--	FALSE	-5.13e-15	1	FALSE	-6.41483	0.0234343	FALSE	-6.33011	0.0146451	FALSE	0	1	FALSE	-6.09253
Cluster-11149.20630		0.63	1.6	2.77	7.88	5.71	1989	747098400	XP_011097210.1	1666	9.5e-183	anthocyanidin 3-O-glucosyltransferase 5-like [Sesamum indicum]	XM_012992437.1	XM_012992437	360	0	PREDICTED: Erythranthe guttatus anthocyanidin 3-O-glucosyltransferase 5-like (LOC105967837), mRNA	-	-	-	http://www.genome.jp/dbget-bin/www_bget?ko:-	Q40287	1161	1.3e-125	Anthocyanidin 3-O-glucosyltransferase 5 OS=Manihot esculenta OX=3983 GN=GT5 PE=2 SV=1	PF01491//PF00201	Frataxin-like domain//UDP-glucoronosyl and UDP-glucosyl transferase	GO:0016226	iron-sulfur cluster assembly	GO:0016758//GO:0008199	transferase activity, transferring hexosyl groups//ferric iron binding	--	--	--	--	DOWN	-2.10111	9.78e-05	FALSE	0.067868	1	DOWN	-2.14357	3.74e-05	DOWN	-2.95993	1.37e-07	DOWN	-2.94109
Cluster-11149.33585		2.3	2.98	1.42	4.28	2.76	2616	848862457	XP_012832010.1	1443	9e-157	PREDICTED: putative Dol-P-Glc:Glc(2)Man(9)GlcNAc(2)-PP-Dol alpha-1,2-glucosyltransferase isoform X2 [Erythranthe guttata]	XM_012976556.1	XM_012976556	677	0	PREDICTED: Erythranthe guttatus dol-P-Glc:Glc(2)Man(9)GlcNAc(2)-PP-Dol alpha-1,2-glucosyltransferase (LOC105952955), transcript variant X2, mRNA	K03850	ALG10	alpha-1,2-glucosyltransferase	http://www.genome.jp/dbget-bin/www_bget?ko:K03850	Q8L638	947	1.1e-100	Dol-P-Glc:Glc(2)Man(9)GlcNAc(2)-PP-Dol alpha-1,2-glucosyltransferase OS=Arabidopsis thaliana OX=3702 GN=ALG10 PE=1 SV=1	PF06736//PF08650//PF04922	Protein of unknown function (DUF1211)//DASH complex subunit Dad4//DIE2/ALG10 family	GO:0006813//GO:0008608//GO:0006488	potassium ion transport//attachment of spindle microtubules to kinetochore//dolichol-linked oligosaccharide biosynthetic process	GO:0106073//GO:0005267	dolichyl pyrophosphate Glc2Man9GlcNAc2 alpha-1,2-glucosyltransferase activity//potassium channel activity	GO:0072686//GO:0042729	mitotic spindle//DASH complex	KOG2642	Alpha-1,2 glucosyltransferase/transcriptional activator	FALSE	-0.320848	0.835728	FALSE	0.234163	0.890677	FALSE	-0.197364	0.868864	FALSE	-0.216229	0.935128	FALSE	-0.0320439
Cluster-11149.10401		0.96	4.27	1.64	1.74	3.92	1919	747065038	XP_011079130.1	1880	1.4e-207	UDP-glycosyltransferase 74E1-like [Sesamum indicum]	XM_011080828.2	XM_011080828	598	0	PREDICTED: Sesamum indicum UDP-glycosyltransferase 74E1-like (LOC105162724), mRNA	K13691	SGT1	pathogen-inducible salicylic acid glucosyltransferase	http://www.genome.jp/dbget-bin/www_bget?ko:K13691	Q6VAA6	1147	5.3e-124	UDP-glycosyltransferase 74G1 OS=Stevia rebaudiana OX=55670 GN=UGT74G1 PE=1 SV=1	PF04101//PF00201	Glycosyltransferase family 28 C-terminal domain//UDP-glucoronosyl and UDP-glucosyl transferase	--	--	GO:0016758	transferase activity, transferring hexosyl groups	--	--	--	--	FALSE	1.4934	0.0114033	FALSE	-1.56207	0.00660472	FALSE	-0.179457	0.884902	FALSE	-0.180882	1	DOWN	-1.79224
Cluster-11149.9182		0.92	1.6	1.66	4.02	3.62	911	508708047	EOX99943.1	625	2.2e-62	Cysteine-rich RLK (RECEPTOR-like protein kinase) 8 [Theobroma cacao]	CP032248.1	CP032248	98	3.47e-41	Gossypioides kirkii chromosome KI_06	-	-	-	http://www.genome.jp/dbget-bin/www_bget?ko:-	Q94HW2	336	2.7e-30	Retrovirus-related Pol polyprotein from transposon RE1 OS=Arabidopsis thaliana OX=3702 GN=RE1 PE=2 SV=1	PF09198	Bacteriophage T4 beta-glucosyltransferase	GO:0099018	restriction-modification system evasion by virus	GO:0033821	DNA beta-glucosyltransferase activity	--	--	--	--	FALSE	-1.11734	0.186135	FALSE	-0.244604	0.921381	FALSE	-1.47167	0.0298957	FALSE	-1.45778	0.0750855	FALSE	-1.75084
Cluster-11127.0		0.66	1.86	0.96	0.65	0.36	1672	747084473	XP_011089649.1	1753	6.5e-193	anthocyanidin 3-O-glucosyltransferase [Sesamum indicum]	XM_011091347.2	XM_011091347	621	0	PREDICTED: Sesamum indicum anthocyanidin 3-O-glucosyltransferase (LOC105170545), mRNA	-	-	-	http://www.genome.jp/dbget-bin/www_bget?ko:-	Q43716	1567	9.1e-173	Anthocyanidin-3-O-glucoside rhamnosyltransferase OS=Petunia hybrida OX=4102 GN=RT PE=2 SV=1	PF00201//PF04101	UDP-glucoronosyl and UDP-glucosyl transferase//Glycosyltransferase family 28 C-terminal domain	--	--	GO:0016758	transferase activity, transferring hexosyl groups	--	--	--	--	FALSE	1.70518	0.0167985	FALSE	0.44641	0.877181	UP	2.04014	0.00421698	FALSE	0.675517	0.652387	FALSE	1.07069
Cluster-11149.33468		1.22	1.33	1.21	1.43	2.02	1637	1276260700	PIN17681.1	1505	3.6e-164	UDP-glucuronosyl and UDP-glucosyl transferase [Handroanthus impetiginosus]	XM_024056190.1	XM_024056190	56	1.41e-17	PREDICTED: Quercus suber anthocyanidin 3-O-glucosyltransferase-like (LOC112023577), mRNA	-	-	-	http://www.genome.jp/dbget-bin/www_bget?ko:-	Q66PF2	823	1.7e-86	Putative UDP-rhamnose:rhamnosyltransferase 1 OS=Fragaria ananassa OX=3747 GN=GT4 PE=2 SV=1	PF00201//PF04101//PF02183//PF03033	UDP-glucoronosyl and UDP-glucosyl transferase//Glycosyltransferase family 28 C-terminal domain//Homeobox associated leucine zipper//Glycosyltransferase family 28 N-terminal domain	GO:0030259//GO:0005975//GO:0006355	lipid glycosylation//carbohydrate metabolic process//regulation of transcription, DNA-templated	GO:0043565//GO:0016758	sequence-specific DNA binding//transferase activity, transferring hexosyl groups	--	--	--	--	FALSE	0.101355	1	FALSE	-0.890403	0.23952	FALSE	-0.899396	0.179914	FALSE	0.44537	0.801296	FALSE	-0.494596
Cluster-11149.45175		0	0.42	0	3.43	0	347	--	--	--	--	--	XM_020696073.1	XM_020696073	64	9.86e-23	PREDICTED: Sesamum indicum UDP-glucose:glycoprotein glucosyltransferase (LOC105169128), mRNA	--	--	--	--	--	--	--	--	--	--	--	--	--	--	--	--	--	--	FALSE	-2.60525	0.288411	FALSE	5.82885	0.0907098	FALSE	3.0555	1	FALSE	-5.72746	0.093697	FALSE	0
Cluster-11149.29411		3.74	5.71	5.03	31.51	6.52	3125	1276259899	PIN17014.1	3608	0	Alpha-amylase [Handroanthus impetiginosus]	XM_012999818.1	XM_012999818	737	0	PREDICTED: Erythranthe guttatus alpha-amylase 3, chloroplastic (LOC105974691), mRNA	-	-	-	http://www.genome.jp/dbget-bin/www_bget?ko:-	Q94A41	2919	0	Alpha-amylase 3, chloroplastic OS=Arabidopsis thaliana OX=3702 GN=AMY3 PE=1 SV=1	PF00128//PF07821//PF02324	Alpha amylase, catalytic domain//Alpha-amylase C-terminal beta-sheet domain//Glycosyl hydrolase family 70	GO:0009250//GO:0005982//GO:0005985//GO:0005975	glucan biosynthetic process//starch metabolic process//sucrose metabolic process//carbohydrate metabolic process	GO:0003824//GO:0046527//GO:0004556//GO:0005509	catalytic activity//glucosyltransferase activity//alpha-amylase activity//calcium ion binding	--	--	--	--	DOWN	-2.26326	3.69e-06	UP	1.8771	0.000151788	FALSE	-0.49688	0.430814	DOWN	-2.40018	9.64e-07	FALSE	-0.573057
Cluster-11149.22839		11.99	17.89	15.51	27.43	11.82	2502	747066938	XP_011080168.1	1621	2e-177	sterol 3-beta-glucosyltransferase UGT80A2-like isoform X1 [Sesamum indicum]	XM_011081866.2	XM_011081866	705	0	PREDICTED: Sesamum indicum sterol 3-beta-glucosyltransferase UGT80A2-like (LOC105163501), transcript variant X1, mRNA	K05841	E2.4.1.173	sterol 3beta-glucosyltransferase	http://www.genome.jp/dbget-bin/www_bget?ko:K05841	Q9M8Z7	1329	5.4e-145	Sterol 3-beta-glucosyltransferase UGT80A2 OS=Arabidopsis thaliana OX=3702 GN=UGT80A2 PE=1 SV=1	PF00201//PF12199//PF03033	UDP-glucoronosyl and UDP-glucosyl transferase//Extracellular fibrinogen binding protein C terminal//Glycosyltransferase family 28 N-terminal domain	GO:0030259//GO:0005975	lipid glycosylation//carbohydrate metabolic process	GO:0001848//GO:0016758	complement binding//transferase activity, transferring hexosyl groups	GO:0005615	extracellular space	--	--	FALSE	-0.415892	0.650416	FALSE	0.818617	0.173224	FALSE	0.291956	0.702725	FALSE	-0.518331	0.502231	FALSE	0.25027
Cluster-11149.11966		3.13	3	1.9	5.76	3.88	2746	1276254932	PIN12889.1	1638	2.3e-179	Sterol 3-beta-glucosyltransferase [Handroanthus impetiginosus]	XM_011089476.2	XM_011089476	616	0	PREDICTED: Sesamum indicum sterol 3-beta-glucosyltransferase UGT80B1 (LOC105169161), transcript variant X4, mRNA	-	-	-	http://www.genome.jp/dbget-bin/www_bget?ko:-	Q9XIG1	231	1.2e-17	Sterol 3-beta-glucosyltransferase UGT80B1 OS=Arabidopsis thaliana OX=3702 GN=UGT80B1 PE=2 SV=1	PF00201//PF15281	UDP-glucoronosyl and UDP-glucosyl transferase//Consortin C-terminus	GO:0042998	positive regulation of Golgi to plasma membrane protein transport	GO:0016758//GO:0071253	transferase activity, transferring hexosyl groups//connexin binding	GO:0005802	trans-Golgi network	--	--	FALSE	-0.73994	0.289877	FALSE	0.17512	0.96505	FALSE	-0.675479	0.264745	FALSE	-0.202863	0.944141	FALSE	-0.0777244
Cluster-14464.0		2.16	0.12	0	0.7	1.12	1329	747092623	XP_011094086.1	1117	2.9e-119	beta-glucosidase-like [Sesamum indicum]	XM_011095849.2	XM_011095849	226	3.58e-112	PREDICTED: Sesamum indicum beta-glucosidase (LOC105173929), transcript variant X1, mRNA	K12695	RG	raucaffricine beta-D-glucosidase / vomilenine glucosyltransferase [EC:3.2.1.125 2.4.1.219]	http://www.genome.jp/dbget-bin/www_bget?ko:K12695	Q8GVD0	921	5.9e-98	Oleuropein beta-glucosidase OS=Olea europaea OX=4146 GN=GLU PE=1 SV=1	PF00232	Glycosyl hydrolase family 1	GO:0005975	carbohydrate metabolic process	GO:0004553	hydrolase activity, hydrolyzing O-glycosyl compounds	--	--	--	--	FALSE	-2.27832	0.0549811	FALSE	-1.05613	0.271237	DOWN	-3.43544	0.000178094	UP	2.28096	0.000583846	FALSE	1.1748
Cluster-2807.0		0	0.3	0.29	1.5	3.77	391	1570344905	XP_027920089.1	569	2.9e-56	LOW QUALITY PROTEIN: polyubiquitin-C [Vigna unguiculata]	XM_017608472.1	XM_017608472	210	7.76e-104	PREDICTED: Rhagoletis zephyria polyubiquitin-B (LOC108357389), partial mRNA	K08770	UBC	ubiquitin C	http://www.genome.jp/dbget-bin/www_bget?ko:K08770	P0CG84	557	2.8e-56	Polyubiquitin (Fragment) OS=Nicotiana sylvestris OX=4096 GN=UBI4 PE=2 SV=1	PF07847//PF06427//PF14560//PF00240	PCO_ADO//UDP-glucose:Glycoprotein Glucosyltransferase//Ubiquitin-like domain//Ubiquitin family	GO:0006486//GO:0055114	protein glycosylation//oxidation-reduction process	GO:0003980//GO:0005515//GO:0016702	UDP-glucose:glycoprotein glucosyltransferase activity//protein binding//oxidoreductase activity, acting on single donors with incorporation of molecular oxygen, incorporation of two atoms of oxygen	--	--	KOG0001	Ubiquitin and ubiquitin-like proteins	FALSE	-1.94162	0.565463	FALSE	-1.7066	0.204631	FALSE	-3.73202	0.0181631	FALSE	-5.06564	0.362672	FALSE	-6.54907
Cluster-11149.25803		5.89	10.34	7.25	7.02	5.88	2340	1276258803	PIN16113.1	1442	1e-156	Glucosyltransferase - Alg8p [Handroanthus impetiginosus]	XM_011095186.2	XM_011095186	594	0	PREDICTED: Sesamum indicum probable dolichyl pyrophosphate Glc1Man9GlcNAc2 alpha-1,3-glucosyltransferase (LOC105173449), mRNA	K03849	ALG8	alpha-1,3-glucosyltransferase	http://www.genome.jp/dbget-bin/www_bget?ko:K03849	O80505	1072	3.2e-115	Probable dolichyl pyrophosphate Glc1Man9GlcNAc2 alpha-1,3-glucosyltransferase OS=Arabidopsis thaliana OX=3702 GN=At2g44660 PE=2 SV=3	PF09594//PF03155	Glycosyltransferase family 87//ALG6, ALG8 glycosyltransferase family	--	--	GO:0016758	transferase activity, transferring hexosyl groups	GO:0005789	endoplasmic reticulum membrane	KOG2576	Glucosyltransferase - Alg8p	FALSE	0.760314	0.244997	FALSE	-0.141521	0.998792	FALSE	0.508016	0.418786	FALSE	0.421055	0.660368	FALSE	0.229533
Cluster-11149.16726		4.46	8.02	4.66	7.82	4.49	1165	848925757	XP_012858760.1	1413	1.2e-153	PREDICTED: putative pentatricopeptide repeat-containing protein At1g12700, mitochondrial [Erythranthe guttata]	XM_028213703.1	XM_028213703	47	1e-12	PREDICTED: Camellia sinensis putative pentatricopeptide repeat-containing protein At1g12700, mitochondrial (LOC114272035), transcript variant X2, mRNA	-	-	-	http://www.genome.jp/dbget-bin/www_bget?ko:-	P0C7Q7	760	2.4e-79	Putative pentatricopeptide repeat-containing protein At1g12700, mitochondrial OS=Arabidopsis thaliana OX=3702 GN=At1g12700 PE=3 SV=1	PF09198	Bacteriophage T4 beta-glucosyltransferase	GO:0099018	restriction-modification system evasion by virus	GO:0033821	DNA beta-glucosyltransferase activity	--	--	--	--	FALSE	0.241901	0.928883	FALSE	0.403384	0.70386	FALSE	0.534544	0.431653	FALSE	-0.137095	1	FALSE	0.216262
Cluster-11149.28843		21.32	24.01	19.94	43.32	24.61	5376	1276261339	PIN18202.1	5846	0	UDP-glucose:glycoprotein glucosyltransferase [Handroanthus impetiginosus]	XM_020696073.1	XM_020696073	2640	0	PREDICTED: Sesamum indicum UDP-glucose:glycoprotein glucosyltransferase (LOC105169128), mRNA	K11718	HUGT	UDP-glucose:glycoprotein glucosyltransferase	http://www.genome.jp/dbget-bin/www_bget?ko:K11718	Q0WL80	4176	0	UDP-glucose:glycoprotein glucosyltransferase OS=Arabidopsis thaliana OX=3702 GN=UGGT PE=1 SV=1	PF06427//PF01501	UDP-glucose:Glycoprotein Glucosyltransferase//Glycosyl transferase family 8	GO:0006486	protein glycosylation	GO:0016757//GO:0003980	transferase activity, transferring glycosyl groups//UDP-glucose:glycoprotein glucosyltransferase activity	--	--	KOG1879	UDP-glucose:glycoprotein glucosyltransferase	FALSE	-0.652184	0.343167	FALSE	0.420297	0.606917	FALSE	-0.342663	0.612352	FALSE	-0.346264	0.74944	FALSE	0.0240257
Cluster-18498.0		0.29	0.71	0.82	0.46	0.86	1548	747086789	XP_011090910.1	1623	7.1e-178	beta-D-glucosyl crocetin beta-1,6-glucosyltransferase-like [Sesamum indicum]	XM_011092609.2	XM_011092609	444	0	PREDICTED: Sesamum indicum beta-D-glucosyl crocetin beta-1,6-glucosyltransferase-like (LOC105171476), mRNA	K21354	-	-	http://www.genome.jp/dbget-bin/www_bget?ko:K21354	A0A0A6ZFY4	997	1.1e-106	UDP-glucosyltransferase 29 OS=Panax ginseng OX=4054 GN=UGT29 PE=1 SV=1	PF00201//PF04101//PF03033	UDP-glucoronosyl and UDP-glucosyl transferase//Glycosyltransferase family 28 C-terminal domain//Glycosyltransferase family 28 N-terminal domain	GO:0005975//GO:0030259	carbohydrate metabolic process//lipid glycosylation	GO:0016758	transferase activity, transferring hexosyl groups	--	--	--	--	FALSE	0.842668	0.566119	FALSE	-1.30896	0.16782	FALSE	-0.576553	0.607972	FALSE	0.0414065	1	FALSE	-1.3148
Cluster-2353.0		0	0	0	0	1.31	841	1344045501	XP_023902797.1	194	2e-12	sterol 3-beta-glucosyltransferase-like [Quercus suber]	--	--	--	--	--	--	--	--	--	C4B4E5	493	1.6e-48	Sterol 3-beta-glucosyltransferase OS=Glomerella lagenarium OX=5462 GN=ATG26 PE=3 SV=1	--	--	--	--	--	--	--	--	--	--	FALSE	-5.13e-15	1	DOWN	-7.40635	0.000334225	DOWN	-7.32111	0.000277514	FALSE	0	1	DOWN	-7.08192
Cluster-11149.24721		210.54	263.64	284.06	279.6	152.44	703	747092744	XP_011094151.1	839	2.6e-87	beta-glucosidase isoform X1 [Sesamum indicum]	XM_011095784.2	XM_011095784	131	1.2e-59	PREDICTED: Sesamum indicum beta-glucosidase-like (LOC105173883), mRNA	K12695	RG	raucaffricine beta-D-glucosidase / vomilenine glucosyltransferase [EC:3.2.1.125 2.4.1.219]	http://www.genome.jp/dbget-bin/www_bget?ko:K12695	Q8GVD0	586	2.2e-59	Oleuropein beta-glucosidase OS=Olea europaea OX=4146 GN=GLU PE=1 SV=1	PF14630//PF00232	Origin recognition complex (ORC) subunit 5 C-terminus//Glycosyl hydrolase family 1	GO:0005975//GO:0006260	carbohydrate metabolic process//DNA replication	GO:0004553	hydrolase activity, hydrolyzing O-glycosyl compounds	GO:0000808//GO:0005634	origin recognition complex//nucleus	--	--	FALSE	0.130069	1	FALSE	0.476016	0.538014	FALSE	0.495304	0.415734	FALSE	0.255865	0.839458	FALSE	0.681866
Cluster-15815.0		0	0.2	0.2	0.67	0.88	1136	1600642273	TEY26567.1	1157	5.7e-124	hypothetical protein Saspl_038277 [Salvia splendens]	XM_011093683.2	XM_011093683	403	0	PREDICTED: Sesamum indicum protein O-glucosyltransferase 1 (LOC105172294), mRNA	K13667	RUMI, KTELC1	protein glucosyltransferase	http://www.genome.jp/dbget-bin/www_bget?ko:K13667	Q8NBL1	203	9.1e-15	Protein O-glucosyltransferase 1 OS=Homo sapiens OX=9606 GN=POGLUT1 PE=1 SV=1	--	--	--	--	--	--	--	--	--	--	FALSE	-1.51703	0.400319	FALSE	-0.781059	0.561425	FALSE	-2.40201	0.0168289	FALSE	-6.5231	0.00968287	DOWN	-7.08192
Cluster-9174.0		0.95	1.34	1.38	2.1	0.28	1497	747086789	XP_011090910.1	1483	1.2e-161	beta-D-glucosyl crocetin beta-1,6-glucosyltransferase-like [Sesamum indicum]	XM_023017389.1	XM_023017389	135	1.56e-61	PREDICTED: Olea europaea var. sylvestris beta-D-glucosyl crocetin beta-1,6-glucosyltransferase-like (LOC111392123), mRNA	K21354	-	-	http://www.genome.jp/dbget-bin/www_bget?ko:K21354	F8WKW8	863	3.5e-91	Beta-D-glucosyl crocetin beta-1,6-glucosyltransferase OS=Gardenia jasminoides OX=114476 GN=UGT94E5 PE=1 SV=1	PF04101//PF00201//PF13520	Glycosyltransferase family 28 C-terminal domain//UDP-glucoronosyl and UDP-glucosyl transferase//Amino acid permease	GO:0055085	transmembrane transport	GO:0016758//GO:0022857	transferase activity, transferring hexosyl groups//transmembrane transporter activity	GO:0016020	membrane	--	--	FALSE	-0.441223	0.768606	UP	2.51376	0.00112797	FALSE	1.9613	0.0146451	FALSE	-0.46619	0.78937	FALSE	1.99402
Cluster-11149.23302		3.4	3.89	0	243.2	155.32	466	747092744	XP_011094151.1	231	5.5e-17	beta-glucosidase isoform X1 [Sesamum indicum]	--	--	--	--	--	K12695	RG	raucaffricine beta-D-glucosidase / vomilenine glucosyltransferase [EC:3.2.1.125 2.4.1.219]	http://www.genome.jp/dbget-bin/www_bget?ko:K12695	Q8GVD0	143	3.3e-08	Oleuropein beta-glucosidase OS=Olea europaea OX=4146 GN=GLU PE=1 SV=1	PF00232	Glycosyl hydrolase family 1	GO:0005975	carbohydrate metabolic process	GO:0004553	hydrolase activity, hydrolyzing O-glycosyl compounds	--	--	--	--	DOWN	-5.72148	3.24e-23	FALSE	0.245767	0.844012	DOWN	-5.58481	2.03e-22	DOWN	-5.50063	1.52e-21	DOWN	-5.30322
Cluster-11149.5363		2.43	0	0.15	0	0	847	1276252011	PIN10563.1	762	2.7e-78	UDP-glucuronosyl and UDP-glucosyl transferase [Handroanthus impetiginosus]	--	--	--	--	--	K21354	-	-	http://www.genome.jp/dbget-bin/www_bget?ko:K21354	F8WKW8	626	6e-64	Beta-D-glucosyl crocetin beta-1,6-glucosyltransferase OS=Gardenia jasminoides OX=114476 GN=UGT94E5 PE=1 SV=1	PF00201//PF04101	UDP-glucoronosyl and UDP-glucosyl transferase//Glycosyltransferase family 28 C-terminal domain	--	--	GO:0016758	transferase activity, transferring hexosyl groups	--	--	--	--	FALSE	-5.13e-15	1	FALSE	0	1	FALSE	0	1	UP	8.47079	3.05e-07	UP	8.19832
Cluster-11149.9811		6.09	8.92	22.25	0	0	578	187761623	BAG31950.1	280	1.4e-22	UGT73A9 [Antirrhinum majus]	KU712254.1	KU712254	97	7.74e-41	Scutellaria baicalensis clone SbGT34 UDP-glucosyltransferase mRNA, complete cds	-	-	-	http://www.genome.jp/dbget-bin/www_bget?ko:-	Q9AT54	196	3e-14	Scopoletin glucosyltransferase OS=Nicotiana tabacum OX=4097 GN=TOGT1 PE=1 SV=1	PF03586	Herpesvirus UL36 tegument protein	GO:0006508//GO:0039693	proteolysis//viral DNA genome replication	GO:0019784	NEDD8-specific protease activity	--	--	--	--	UP	9.2063	7.07e-11	FALSE	0	1	UP	8.93943	3.77e-10	UP	8.92109	3.53e-09	UP	8.64839
Cluster-11149.9810		37.05	25.01	15.22	2.71	24.06	2120	604333301	EYU37652.1	1906	1.5e-210	hypothetical protein MIMGU_mgv1a005524mg [Erythranthe guttata]	AB362993.1	AB362993	305	7.01e-156	Antirrhinum majus AmUGT21 mRNA for UGT73A9, complete cds	-	-	-	http://www.genome.jp/dbget-bin/www_bget?ko:-	Q9AT54	1544	5.4e-170	Scopoletin glucosyltransferase OS=Nicotiana tabacum OX=4097 GN=TOGT1 PE=1 SV=1	PF00201	UDP-glucoronosyl and UDP-glucosyl transferase	--	--	GO:0016758	transferase activity, transferring hexosyl groups	--	--	--	--	UP	3.40638	1.11e-11	DOWN	-3.54474	2.37e-12	FALSE	-0.249211	0.748521	UP	4.4463	4.35e-18	FALSE	0.851658
Cluster-11149.43647		2.06	2.91	1.71	10.99	2.91	1977	1276252011	PIN10563.1	1484	1.2e-161	UDP-glucuronosyl and UDP-glucosyl transferase [Handroanthus impetiginosus]	XM_012978904.1	XM_012978904	81	2.17e-31	PREDICTED: Erythranthe guttatus beta-D-glucosyl crocetin beta-1,6-glucosyltransferase-like (LOC105955200), mRNA	K21354	-	-	http://www.genome.jp/dbget-bin/www_bget?ko:K21354	F8WKW8	1073	2.1e-115	Beta-D-glucosyl crocetin beta-1,6-glucosyltransferase OS=Gardenia jasminoides OX=114476 GN=UGT94E5 PE=1 SV=1	PF00201//PF03033//PF04101	UDP-glucoronosyl and UDP-glucosyl transferase//Glycosyltransferase family 28 N-terminal domain//Glycosyltransferase family 28 C-terminal domain	GO:0005975//GO:0030259	carbohydrate metabolic process//lipid glycosylation	GO:0016758	transferase activity, transferring hexosyl groups	--	--	--	--	DOWN	-1.71531	0.00122852	UP	1.51724	0.00485376	FALSE	-0.308664	0.722434	DOWN	-1.74035	0.00116795	FALSE	-0.273075
Cluster-11149.18898		2.75	4.17	2.71	6.34	3.05	2139	1276243788	PIN04342.1	640	9.5e-64	hypothetical protein CDL12_23117 [Handroanthus impetiginosus]	XM_011103848.2	XM_011103848	337	1.15e-173	PREDICTED: Sesamum indicum uncharacterized LOC105180187 (LOC105180187), mRNA	-	-	-	http://www.genome.jp/dbget-bin/www_bget?ko:-	--	--	--	--	PF00569//PF09198//PF01625	Zinc finger, ZZ type//Bacteriophage T4 beta-glucosyltransferase//Peptide methionine sulfoxide reductase	GO:0055114//GO:0099018//GO:0006464	oxidation-reduction process//restriction-modification system evasion by virus//cellular protein modification process	GO:0008113//GO:0033821//GO:0008270	peptide-methionine (S)-S-oxide reductase activity//DNA beta-glucosyltransferase activity//zinc ion binding	--	--	--	--	FALSE	-0.401799	0.704672	FALSE	0.658589	0.360185	FALSE	0.146087	0.929368	FALSE	-0.527602	0.534943	FALSE	0.0809745
Cluster-11149.44973		0.11	0	0	24.39	98.12	1377	1276264221	PIN20653.1	388	1e-34	Beta-glucosidase, lactase phlorizinhydrolase [Handroanthus impetiginosus]	XM_011083315.2	XM_011083315	44	5.54e-11	PREDICTED: Sesamum indicum uncharacterized LOC105164621 (LOC105164621), mRNA	K12695	RG	raucaffricine beta-D-glucosidase / vomilenine glucosyltransferase [EC:3.2.1.125 2.4.1.219]	http://www.genome.jp/dbget-bin/www_bget?ko:K12695	Q9SPP9	332	1.2e-29	Raucaffricine-O-beta-D-glucosidase OS=Rauvolfia serpentina OX=4060 GN=RG PE=1 SV=1	PF00232	Glycosyl hydrolase family 1	GO:0005975	carbohydrate metabolic process	GO:0004553	hydrolase activity, hydrolyzing O-glycosyl compounds	--	--	--	--	DOWN	-12.2202	9.75e-28	DOWN	-2.40508	6.73e-07	DOWN	-14.4687	5.52e-45	DOWN	-7.03645	6.22e-23	DOWN	-9.48222
Cluster-11149.7196		3.16	7.81	4.32	0.2	0.77	1536	747047805	XP_011069886.1	1729	3.6e-190	anthocyanidin 3-O-glucosyltransferase-like [Sesamum indicum]	XM_011071584.2	XM_011071584	507	0	PREDICTED: Sesamum indicum anthocyanidin 3-O-glucosyltransferase-like (LOC105155667), mRNA	-	-	-	http://www.genome.jp/dbget-bin/www_bget?ko:-	Q96493	1184	2.2e-128	Anthocyanidin 3-O-glucosyltransferase OS=Gentiana triflora OX=55190 PE=1 SV=1	PF13202//PF00201	EF hand//UDP-glucoronosyl and UDP-glucosyl transferase	--	--	GO:0016758//GO:0005509	transferase activity, transferring hexosyl groups//calcium ion binding	--	--	--	--	UP	5.48013	3.06e-16	FALSE	-2.33588	0.0174911	UP	3.03158	6.17e-08	UP	4.64419	6.71e-11	UP	2.2594
Cluster-11149.4424		0.08	0.06	0.06	18.96	8.36	1748	747070457	XP_011082053.1	1916	8.5e-212	UDP-glycosyltransferase 74G1-like [Sesamum indicum]	XM_011083751.2	XM_011083751	568	0	PREDICTED: Sesamum indicum UDP-glycosyltransferase 74G1-like (LOC105164920), mRNA	K13691	SGT1	pathogen-inducible salicylic acid glucosyltransferase	http://www.genome.jp/dbget-bin/www_bget?ko:K13691	Q6VAA6	1088	3.3e-117	UDP-glycosyltransferase 74G1 OS=Stevia rebaudiana OX=55670 GN=UGT74G1 PE=1 SV=1	PF00201//PF04101	UDP-glucoronosyl and UDP-glucosyl transferase//Glycosyltransferase family 28 C-terminal domain	--	--	GO:0016758	transferase activity, transferring hexosyl groups	--	--	--	--	DOWN	-8.05121	4.1e-26	FALSE	0.784781	0.21311	DOWN	-7.36156	4.01e-22	DOWN	-7.08512	3.04e-23	DOWN	-6.34115
Cluster-11149.15797		17.88	12.13	20.67	41.32	51.2	3095	302143601	CBI22354.3	1478	9.3e-161	unnamed protein product, partial [Vitis vinifera]	XM_020697626.1	XM_020697626	334	7.79e-172	PREDICTED: Sesamum indicum polyubiquitin-like (LOC105174002), transcript variant X2, mRNA	K08770	UBC	ubiquitin C	http://www.genome.jp/dbget-bin/www_bget?ko:K08770	Q1EC66	905	9.8e-96	Polyubiquitin 3 OS=Arabidopsis thaliana OX=3702 GN=UBQ3 PE=2 SV=1	PF04452//PF06427//PF14560//PF02877//PF00240	RNA methyltransferase//UDP-glucose:Glycoprotein Glucosyltransferase//Ubiquitin-like domain//Poly(ADP-ribose) polymerase, regulatory domain//Ubiquitin family	GO:0006471//GO:0006486//GO:0006364	protein ADP-ribosylation//protein glycosylation//rRNA processing	GO:0005515//GO:0008168//GO:0003980//GO:0003950	protein binding//methyltransferase activity//UDP-glucose:glycoprotein glucosyltransferase activity//NAD+ ADP-ribosyltransferase activity	--	--	KOG0001	Ubiquitin and ubiquitin-like proteins	DOWN	-1.56751	0.00210931	FALSE	-0.705209	0.267023	DOWN	-2.38347	3.99e-07	FALSE	-0.53267	0.473784	FALSE	-1.28787
Cluster-11149.42375		8.9	7.93	16.45	10.7	15.17	440	747092744	XP_011094151.1	316	7.3e-27	beta-glucosidase isoform X1 [Sesamum indicum]	--	--	--	--	--	K12695	RG	raucaffricine beta-D-glucosidase / vomilenine glucosyltransferase [EC:3.2.1.125 2.4.1.219]	http://www.genome.jp/dbget-bin/www_bget?ko:K12695	Q8GVD0	199	1e-14	Oleuropein beta-glucosidase OS=Olea europaea OX=4146 GN=GLU PE=1 SV=1	PF00232	Glycosyl hydrolase family 1	GO:0005975	carbohydrate metabolic process	GO:0004553	hydrolase activity, hydrolyzing O-glycosyl compounds	--	--	--	--	FALSE	-0.191788	1	FALSE	-0.903173	0.234095	FALSE	-1.20514	0.0647383	FALSE	0.382112	0.816983	FALSE	-0.570597
Cluster-13488.0		0	0.62	0.98	0	0	603	629088917	KCW55170.1	515	8.4e-50	hypothetical protein EUGRSUZ_I01127 [Eucalyptus grandis]	AP010388.1	AP010388	69	2.97e-25	Lotus japonicus genomic DNA, chromosome 4, clone: LjT34M17, TM2027, complete sequence	-	-	-	http://www.genome.jp/dbget-bin/www_bget?ko:-	Q8H0F2	483	1.6e-47	Anthocyanin 3'-O-beta-glucosyltransferase OS=Gentiana triflora OX=55190 PE=1 SV=1	PF00201	UDP-glucoronosyl and UDP-glucosyl transferase	--	--	GO:0016758	transferase activity, transferring hexosyl groups	--	--	--	--	FALSE	5.49232	0.244997	FALSE	0	1	FALSE	5.23147	0.165707	FALSE	0	1	FALSE	0
Cluster-11149.5597		0.23	1.48	0.28	4.64	10.91	1532	747058028	XP_011075344.1	1798	3.6e-198	zeatin O-glucosyltransferase-like [Sesamum indicum]	XM_023001145.1	XM_023001145	139	9.57e-64	PREDICTED: Olea europaea var. sylvestris zeatin O-glucosyltransferase-like (LOC111377985), mRNA	K13495	CISZOG	cis-zeatin O-glucosyltransferase	http://www.genome.jp/dbget-bin/www_bget?ko:K13495	Q9ZSK5	1233	4.5e-134	Zeatin O-glucosyltransferase OS=Phaseolus lunatus OX=3884 GN=ZOG1 PE=2 SV=1	PF04101//PF00201	Glycosyltransferase family 28 C-terminal domain//UDP-glucoronosyl and UDP-glucosyl transferase	--	--	GO:0016758	transferase activity, transferring hexosyl groups	--	--	--	--	FALSE	-1.44697	0.0223181	DOWN	-1.6284	0.0021407	DOWN	-3.18548	1.34e-09	DOWN	-3.63481	1.08e-07	DOWN	-5.30917
Cluster-11577.0		0	0.2	0	0.2	2.78	467	747070455	XP_011082052.1	505	9.3e-49	UDP-glycosyltransferase 74F2-like [Sesamum indicum]	--	--	--	--	--	K13691	SGT1	pathogen-inducible salicylic acid glucosyltransferase	http://www.genome.jp/dbget-bin/www_bget?ko:K13691	Q9SYK9	416	7.4e-40	UDP-glycosyltransferase 74E2 OS=Arabidopsis thaliana OX=3702 GN=UGT74E2 PE=1 SV=1	--	--	--	--	--	--	--	--	--	--	FALSE	0.234667	1	FALSE	-4.0498	0.00955426	FALSE	-3.90562	0.00847412	FALSE	-2.90649	1	DOWN	-6.72239
Cluster-2290.0		0	0	0	0	5.43	326	1344026274	XP_023896125.1	379	2.7e-34	uncharacterized protein LOC112008005 [Quercus suber]	XM_007803218.1	XM_007803218	46	9.33e-13	Endocarpon pusillum Z07020 hypothetical protein mRNA	K05841	E2.4.1.173	sterol 3beta-glucosyltransferase	http://www.genome.jp/dbget-bin/www_bget?ko:K05841	Q9M8Z7	287	4.7e-25	Sterol 3-beta-glucosyltransferase UGT80A2 OS=Arabidopsis thaliana OX=3702 GN=UGT80A2 PE=1 SV=1	PF00201//PF04101	UDP-glucoronosyl and UDP-glucosyl transferase//Glycosyltransferase family 28 C-terminal domain	--	--	GO:0016758	transferase activity, transferring hexosyl groups	--	--	KOG1192	UDP-glucuronosyl and UDP-glucosyl transferase	FALSE	-5.13e-15	1	FALSE	-6.56514	0.0149166	FALSE	-6.48032	0.00923724	FALSE	0	1	FALSE	-6.24242
Cluster-11149.25858		0.13	17.45	6.71	29.78	11.73	2160	747059555	XP_011076164.1	2064	7.3e-229	O-glucosyltransferase rumi homolog [Sesamum indicum]	XM_011077862.2	XM_011077862	704	0	PREDICTED: Sesamum indicum O-glucosyltransferase rumi homolog (LOC105160475), mRNA	-	-	-	http://www.genome.jp/dbget-bin/www_bget?ko:-	B0X1Q4	291	1.1e-24	O-glucosyltransferase rumi homolog OS=Culex quinquefasciatus OX=7176 GN=CPIJ013394 PE=3 SV=1	--	--	--	--	--	--	--	--	--	--	FALSE	-0.569545	0.440981	FALSE	0.947745	0.0963872	FALSE	0.267435	0.725283	DOWN	-7.11067	1.16e-27	DOWN	-6.20826
Cluster-11149.45524		0.48	0.07	0.28	2.47	2.1	867	1276234629	PIM98411.1	410	1.8e-37	UDP-glucuronosyl and UDP-glucosyl transferase [Handroanthus impetiginosus]	XM_011092606.2	XM_011092606	167	1.45e-79	PREDICTED: Sesamum indicum beta-D-glucosyl crocetin beta-1,6-glucosyltransferase-like (LOC105171473), mRNA	K21354	-	-	http://www.genome.jp/dbget-bin/www_bget?ko:K21354	Q8GVE3	228	8.7e-18	Flavanone 7-O-glucoside 2''-O-beta-L-rhamnosyltransferase OS=Citrus maxima OX=37334 GN=C12RT1 PE=1 SV=2	--	--	--	--	--	--	--	--	--	--	DOWN	-4.75624	2.78e-05	FALSE	-0.161008	1	DOWN	-4.99896	1.89e-05	FALSE	-1.66977	0.108213	FALSE	-1.87759
Cluster-11149.4756		0.54	0.79	0.71	1.95	1.12	3357	1343999361	XP_023881891.1	2190	2.8e-243	uncharacterized protein LOC111994244 [Quercus suber]	EU103500.1	EU103500	41	6.38e-09	Gossypium herbaceum isolate GH84_448117 LINE reverse transcriptase gene, partial sequence	-	-	-	http://www.genome.jp/dbget-bin/www_bget?ko:-	P0C2F6	522	2.7e-51	Putative ribonuclease H protein At1g65750 OS=Arabidopsis thaliana OX=3702 GN=At1g65750 PE=3 SV=1	PF06427//PF07967//PF13456	UDP-glucose:Glycoprotein Glucosyltransferase//C3HC zinc finger-like//Reverse transcriptase-like	GO:0051252//GO:0006486	regulation of RNA metabolic process//protein glycosylation	GO:0004523//GO:0003676//GO:0003980//GO:0008270	RNA-DNA hybrid ribonuclease activity//nucleic acid binding//UDP-glucose:glycoprotein glucosyltransferase activity//zinc ion binding	GO:0042025	host cell nucleus	--	--	FALSE	-1.0971	0.101362	FALSE	0.408167	0.70386	FALSE	-0.79931	0.222851	FALSE	-1.16679	0.083605	FALSE	-0.808289
Cluster-11149.39100		6.71	5.58	2.38	0.12	9.25	1979	1173753835	XP_020547050.1	1216	1.4e-130	crocetin glucosyltransferase, chloroplastic-like [Sesamum indicum]	XM_011103290.2	XM_011103290	274	1.12e-138	PREDICTED: Sesamum indicum crocetin glucosyltransferase, chloroplastic-like (LOC105179652), mRNA	K21371	-	-	http://www.genome.jp/dbget-bin/www_bget?ko:K21371	F8WKW0	1083	1.4e-116	Crocetin glucosyltransferase, chloroplastic OS=Gardenia jasminoides OX=114476 GN=UGT75L6 PE=1 SV=1	PF00201//PF03033//PF04101	UDP-glucoronosyl and UDP-glucosyl transferase//Glycosyltransferase family 28 N-terminal domain//Glycosyltransferase family 28 C-terminal domain	GO:0005975//GO:0030259	carbohydrate metabolic process//lipid glycosylation	GO:0016758	transferase activity, transferring hexosyl groups	--	--	--	--	UP	5.67869	1.5e-16	DOWN	-6.60154	1.16e-21	FALSE	-1.03543	0.0491939	UP	6.41216	1.51e-20	FALSE	-0.236406
Cluster-11149.33760		8.03	17.04	16.31	22.67	23.3	1880	604314648	EYU27354.1	312	9.1e-26	hypothetical protein MIMGU_mgv1a015673mg [Erythranthe guttata]	XM_011097112.2	XM_011097112	127	5.53e-57	PREDICTED: Sesamum indicum uncharacterized LOC105174881 (LOC105174881), mRNA	K14009	BCAP31, BAP31	B-cell receptor-associated protein 31	http://www.genome.jp/dbget-bin/www_bget?ko:K14009	--	--	--	--	PF09198	Bacteriophage T4 beta-glucosyltransferase	GO:0099018	restriction-modification system evasion by virus	GO:0033821	DNA beta-glucosyltransferase activity	--	--	--	--	FALSE	-0.209313	0.956457	FALSE	-0.436102	0.58992	FALSE	-0.756168	0.165528	FALSE	-0.823811	0.18265	FALSE	-1.30986
Cluster-11149.30173		805.9	426.99	679.53	1226.26	1067.91	447	1445360485	RDX60741.1	734	2.5e-75	Polyubiquitin 4, partial [Mucuna pruriens]	XM_028950326.1	XM_028950326	317	2.97e-163	PREDICTED: Prosopis alba polyubiquitin-like (LOC114761014), mRNA	K08770	UBC	ubiquitin C	http://www.genome.jp/dbget-bin/www_bget?ko:K08770	P0CH33	734	9.5e-77	Polyubiquitin 11 OS=Arabidopsis thaliana OX=3702 GN=UBQ11 PE=2 SV=1	PF04452//PF06427//PF14560//PF00240	RNA methyltransferase//UDP-glucose:Glycoprotein Glucosyltransferase//Ubiquitin-like domain//Ubiquitin family	GO:0006486//GO:0006364	protein glycosylation//rRNA processing	GO:0008168//GO:0005515//GO:0003980	methyltransferase activity//protein binding//UDP-glucose:glycoprotein glucosyltransferase activity	--	--	KOG0001	Ubiquitin and ubiquitin-like proteins	FALSE	-1.28277	0.015518	FALSE	-0.201969	0.908935	DOWN	-1.59551	0.00081191	FALSE	0.0452477	1	FALSE	-0.206728
Cluster-11149.25748		65.27	15.64	10.21	440.38	423.81	1104	747092744	XP_011094151.1	1090	3.2e-116	beta-glucosidase isoform X1 [Sesamum indicum]	XM_011095784.2	XM_011095784	259	1.34e-130	PREDICTED: Sesamum indicum beta-glucosidase-like (LOC105173883), mRNA	K12695	RG	raucaffricine beta-D-glucosidase / vomilenine glucosyltransferase [EC:3.2.1.125 2.4.1.219]	http://www.genome.jp/dbget-bin/www_bget?ko:K12695	Q8GVD0	780	1.1e-81	Oleuropein beta-glucosidase OS=Olea europaea OX=4146 GN=GLU PE=1 SV=1	PF00232	Glycosyl hydrolase family 1	GO:0005975	carbohydrate metabolic process	GO:0004553	hydrolase activity, hydrolyzing O-glycosyl compounds	--	--	--	--	DOWN	-4.60872	8.58e-20	FALSE	-0.342246	0.710553	DOWN	-5.06165	3.91e-23	DOWN	-2.0834	1.69e-05	DOWN	-2.47563
Cluster-3420.0		0	0	0	0	5.23	406	--	--	--	--	--	--	--	--	--	--	--	--	--	--	C4B4E5	187	2.3e-13	Sterol 3-beta-glucosyltransferase OS=Glomerella lagenarium OX=5462 GN=ATG26 PE=3 SV=1	--	--	--	--	--	--	--	--	--	--	FALSE	-5.13e-15	1	DOWN	-7.4839	0.000224466	DOWN	-7.39864	0.000184311	FALSE	0	1	DOWN	-7.15937
Cluster-11149.28987		4.71	10.08	4.51	0	0	1787	747088862	XP_011092044.1	1709	8.8e-188	hydroquinone glucosyltransferase-like [Sesamum indicum]	--	--	--	--	--	K08237	E2.4.1.218	hydroquinone glucosyltransferase	http://www.genome.jp/dbget-bin/www_bget?ko:K08237	Q9AR73	1116	1.9e-120	Hydroquinone glucosyltransferase OS=Rauvolfia serpentina OX=4060 GN=AS PE=1 SV=1	PF04101//PF05750//PF00201	Glycosyltransferase family 28 C-terminal domain//Rubella capsid protein//UDP-glucoronosyl and UDP-glucosyl transferase	--	--	GO:0016758	transferase activity, transferring hexosyl groups	GO:0016021//GO:0019013	integral component of membrane//viral nucleocapsid	--	--	UP	11.5979	7.34e-25	FALSE	0	1	UP	11.3306	3.51e-22	UP	10.7979	2.39e-19	UP	10.5248
Cluster-11149.42960		2.71	1.4	1.65	14.58	11.97	3059	1173757730	XP_011091967.2	1387	3.3e-150	O-glucosyltransferase rumi homolog isoform X1 [Sesamum indicum]	XM_011093665.2	XM_011093665	564	0	PREDICTED: Sesamum indicum O-glucosyltransferase rumi homolog (LOC105172282), transcript variant X1, mRNA	-	-	-	http://www.genome.jp/dbget-bin/www_bget?ko:-	--	--	--	--	--	--	--	--	--	--	--	--	--	--	DOWN	-3.18353	2.92e-10	FALSE	-0.110845	1	DOWN	-3.40481	8.12e-12	DOWN	-1.75313	0.000593683	DOWN	-1.91386
Cluster-11149.9369		4.04	3.81	2.22	19.33	10.67	1521	747077096	XP_011085653.1	1759	1.2e-193	anthocyanidin 3-O-glucosyltransferase 2-like [Sesamum indicum]	XM_011087351.2	XM_011087351	660	0	PREDICTED: Sesamum indicum anthocyanidin 3-O-glucosyltransferase 2-like (LOC105167577), mRNA	-	-	-	http://www.genome.jp/dbget-bin/www_bget?ko:-	Q2V6K0	939	5.5e-100	UDP-glucose flavonoid 3-O-glucosyltransferase 6 OS=Fragaria ananassa OX=3747 GN=GT6 PE=1 SV=1	PF04101//PF00201	Glycosyltransferase family 28 C-terminal domain//UDP-glucoronosyl and UDP-glucosyl transferase	--	--	GO:0016758	transferase activity, transferring hexosyl groups	--	--	--	--	DOWN	-2.13845	3.02e-05	FALSE	0.460885	0.558364	DOWN	-1.7881	0.000431811	DOWN	-1.58596	0.00277784	FALSE	-1.17495
Cluster-11149.15457		61.59	9.9	5.45	360.7	357.22	616	747092623	XP_011094086.1	842	1e-87	beta-glucosidase-like [Sesamum indicum]	XM_011095849.2	XM_011095849	246	1.23e-123	PREDICTED: Sesamum indicum beta-glucosidase (LOC105173929), transcript variant X1, mRNA	K12695	RG	raucaffricine beta-D-glucosidase / vomilenine glucosyltransferase [EC:3.2.1.125 2.4.1.219]	http://www.genome.jp/dbget-bin/www_bget?ko:K12695	Q8GVD0	604	1.6e-61	Oleuropein beta-glucosidase OS=Olea europaea OX=4146 GN=GLU PE=1 SV=1	PF00232	Glycosyl hydrolase family 1	GO:0005975	carbohydrate metabolic process	GO:0004553	hydrolase activity, hydrolyzing O-glycosyl compounds	--	--	--	--	DOWN	-4.96555	2.64e-21	FALSE	-0.385589	0.657022	DOWN	-5.46153	8.5e-25	DOWN	-1.88723	0.000130527	DOWN	-2.32278
Cluster-11149.15456		0.87	1.82	0.4	83.18	71.07	1020	747092744	XP_011094151.1	521	2.9e-50	beta-glucosidase isoform X1 [Sesamum indicum]	XM_011095849.2	XM_011095849	156	2.23e-73	PREDICTED: Sesamum indicum beta-glucosidase (LOC105173929), transcript variant X1, mRNA	K12695	RG	raucaffricine beta-D-glucosidase / vomilenine glucosyltransferase [EC:3.2.1.125 2.4.1.219]	http://www.genome.jp/dbget-bin/www_bget?ko:K12695	Q9SPP9	357	1.1e-32	Raucaffricine-O-beta-D-glucosidase OS=Rauvolfia serpentina OX=4060 GN=RG PE=1 SV=1	PF00232	Glycosyl hydrolase family 1	GO:0005975	carbohydrate metabolic process	GO:0004553	hydrolase activity, hydrolyzing O-glycosyl compounds	--	--	--	--	DOWN	-5.30227	9.59e-22	FALSE	-0.170688	0.949039	DOWN	-5.58271	6.13e-24	DOWN	-5.90561	8.9e-24	DOWN	-6.12449
Cluster-11149.15455		6.46	8.38	2.37	236.52	216.87	464	747092623	XP_011094086.1	376	8.4e-34	beta-glucosidase-like [Sesamum indicum]	XM_027302060.1	XM_027302060	44	1.78e-11	PREDICTED: Coffea eugenioides beta-glucosidase 13-like (LOC113759486), mRNA	K12695	RG	raucaffricine beta-D-glucosidase / vomilenine glucosyltransferase [EC:3.2.1.125 2.4.1.219]	http://www.genome.jp/dbget-bin/www_bget?ko:K12695	Q9SPP9	202	4.8e-15	Raucaffricine-O-beta-D-glucosidase OS=Rauvolfia serpentina OX=4060 GN=RG PE=1 SV=1	PF00232	Glycosyl hydrolase family 1	GO:0005975	carbohydrate metabolic process	GO:0004553	hydrolase activity, hydrolyzing O-glycosyl compounds	--	--	--	--	DOWN	-4.57904	1.08e-17	FALSE	-0.276027	0.796404	DOWN	-4.96507	2.14e-20	DOWN	-4.53834	4.94e-17	DOWN	-4.8635
Cluster-11149.25095		269.94	194.81	228.62	224.6	136.86	1143	747092744	XP_011094151.1	1336	1e-144	beta-glucosidase isoform X1 [Sesamum indicum]	XM_012994058.1	XM_012994058	124	1.54e-55	PREDICTED: Erythranthe guttatus raucaffricine-O-beta-D-glucosidase-like (LOC105969307), mRNA	K12695	RG	raucaffricine beta-D-glucosidase / vomilenine glucosyltransferase [EC:3.2.1.125 2.4.1.219]	http://www.genome.jp/dbget-bin/www_bget?ko:K12695	Q8GVD0	1051	4.2e-113	Oleuropein beta-glucosidase OS=Olea europaea OX=4146 GN=GLU PE=1 SV=1	PF00232	Glycosyl hydrolase family 1	GO:0005975	carbohydrate metabolic process	GO:0004553	hydrolase activity, hydrolyzing O-glycosyl compounds	--	--	--	--	FALSE	0.000775183	1	FALSE	0.317191	0.755115	FALSE	0.207185	0.818119	FALSE	0.936385	0.0981732	FALSE	1.20356
Cluster-11149.11154		0.29	0.87	1.68	2.58	0.87	397	--	--	--	--	--	XM_019243843.1	XM_019243843	38	3.25e-08	PREDICTED: Camelina sativa sterol 3-beta-glucosyltransferase UGT80B1 (LOC104779121), transcript variant X4, mRNA	--	--	--	--	--	--	--	--	--	--	--	--	--	--	--	--	--	--	FALSE	-1.28913	0.578927	FALSE	1.13266	0.751054	FALSE	-0.260693	1	FALSE	-2.38272	0.502231	FALSE	-1.28478
Cluster-11149.4372		0.2	0.48	0.31	6.1	1.89	1524	747070457	XP_011082053.1	1912	2.2e-211	UDP-glycosyltransferase 74G1-like [Sesamum indicum]	XR_003579879.1	XR_003579879	141	7.36e-65	PREDICTED: Solanum pennellii UDP-glycosyltransferase 74G1-like (LOC107027280), misc_RNA	K13691	SGT1	pathogen-inducible salicylic acid glucosyltransferase	http://www.genome.jp/dbget-bin/www_bget?ko:K13691	Q6VAA6	1105	3.1e-119	UDP-glycosyltransferase 74G1 OS=Stevia rebaudiana OX=55670 GN=UGT74G1 PE=1 SV=1	PF04101//PF00201	Glycosyltransferase family 28 C-terminal domain//UDP-glucoronosyl and UDP-glucosyl transferase	--	--	GO:0016758	transferase activity, transferring hexosyl groups	--	--	--	--	DOWN	-3.44147	1.67e-08	FALSE	1.2897	0.036604	DOWN	-2.26042	0.00060235	DOWN	-4.23736	6.55e-10	DOWN	-2.99355
Cluster-11149.17474		6.4	9.87	12.55	13.61	44.2	798	1276255508	PIN13361.1	532	1.2e-51	Glycogenin glucosyltransferase [Handroanthus impetiginosus]	XM_027326827.1	XM_027326827	91	2.35e-37	PREDICTED: Coffea eugenioides putative glucuronosyltransferase PGSIP8 (LOC113781007), mRNA	-	-	-	http://www.genome.jp/dbget-bin/www_bget?ko:-	Q8VZP6	459	1.3e-44	Putative glucuronosyltransferase PGSIP8 OS=Arabidopsis thaliana OX=3702 GN=PGSIP8 PE=2 SV=1	PF01501//PF11051//PF01757	Glycosyl transferase family 8//Mannosyltransferase putative//Acyltransferase family	GO:0006486	protein glycosylation	GO:0016757//GO:0016747	transferase activity, transferring glycosyl groups//transferase activity, transferring acyl groups other than amino-acyl groups	--	--	--	--	FALSE	-0.252383	0.914892	DOWN	-2.09661	3.13e-05	DOWN	-2.45958	5.02e-07	FALSE	-0.421405	0.718837	DOWN	-2.56765
Cluster-11149.1992		2.37	1.66	0.77	1	7.09	1683	747064640	XP_011078913.1	1550	2.3e-169	zeatin O-glucosyltransferase-like [Sesamum indicum]	XM_011080611.2	XM_011080611	323	5.46e-166	PREDICTED: Sesamum indicum zeatin O-glucosyltransferase-like (LOC105162554), mRNA	K13495	CISZOG	cis-zeatin O-glucosyltransferase	http://www.genome.jp/dbget-bin/www_bget?ko:K13495	Q9ZSK5	1234	3.8e-134	Zeatin O-glucosyltransferase OS=Phaseolus lunatus OX=3884 GN=ZOG1 PE=2 SV=1	PF04101//PF00201	Glycosyltransferase family 28 C-terminal domain//UDP-glucoronosyl and UDP-glucosyl transferase	--	--	GO:0016758	transferase activity, transferring hexosyl groups	--	--	--	--	FALSE	0.92859	0.273712	DOWN	-3.21441	3.9e-09	DOWN	-2.39632	4.54e-06	UP	1.90897	0.00189136	FALSE	-1.35481
Cluster-11149.6070		7.44	12.16	11.15	170.26	22.67	756	848905965	XP_012852358.1	713	1.2e-72	PREDICTED: LOW QUALITY PROTEIN: anthocyanidin 3-O-glucosyltransferase 2 [Erythranthe guttata]	--	--	--	--	--	-	-	-	http://www.genome.jp/dbget-bin/www_bget?ko:-	Q40285	569	2.2e-57	Anthocyanidin 3-O-glucosyltransferase 2 (Fragment) OS=Manihot esculenta OX=3983 GN=GT2 PE=2 SV=1	PF00201//PF04558	UDP-glucoronosyl and UDP-glucosyl transferase//Glutaminyl-tRNA synthetase, non-specific RNA binding region part 1	GO:0006418	tRNA aminoacylation for protein translation	GO:0016758//GO:0000166//GO:0005524//GO:0004812	transferase activity, transferring hexosyl groups//nucleotide binding//ATP binding//aminoacyl-tRNA ligase activity	GO:0005737	cytoplasm	--	--	DOWN	-3.59385	5.88e-13	UP	2.50934	2.83e-07	FALSE	-1.1951	0.0233754	DOWN	-3.84793	3.42e-14	FALSE	-1.38842
Cluster-11149.3555		0	0	0	4.86	1.83	1683	1173789045	XP_011075343.2	1863	1.1e-205	zeatin O-glucosyltransferase [Sesamum indicum]	XM_022997813.1	XM_022997813	294	7.22e-150	PREDICTED: Olea europaea var. sylvestris zeatin O-glucosyltransferase-like (LOC111375020), transcript variant X2, mRNA	K13495	CISZOG	cis-zeatin O-glucosyltransferase	http://www.genome.jp/dbget-bin/www_bget?ko:K13495	Q9ZSK5	1194	1.6e-129	Zeatin O-glucosyltransferase OS=Phaseolus lunatus OX=3884 GN=ZOG1 PE=2 SV=1	PF00201//PF04101	UDP-glucoronosyl and UDP-glucosyl transferase//Glycosyltransferase family 28 C-terminal domain	--	--	GO:0016758	transferase activity, transferring hexosyl groups	--	--	--	--	DOWN	-10.2416	1.91e-16	FALSE	1.00967	0.120798	DOWN	-9.07555	1.47e-10	DOWN	-10.0676	4.18e-14	DOWN	-8.83521
Cluster-8902.0		2.73	0	0.15	0.75	0.91	534	747092623	XP_011094086.1	533	6e-52	beta-glucosidase-like [Sesamum indicum]	XM_011079406.2	XM_011079406	92	4.28e-38	PREDICTED: Sesamum indicum beta-glucosidase-like (LOC105161651), mRNA	K12695	RG	raucaffricine beta-D-glucosidase / vomilenine glucosyltransferase [EC:3.2.1.125 2.4.1.219]	http://www.genome.jp/dbget-bin/www_bget?ko:K12695	Q8GVD0	403	2.7e-38	Oleuropein beta-glucosidase OS=Olea europaea OX=4146 GN=GLU PE=1 SV=1	PF00232	Glycosyl hydrolase family 1	GO:0005975	carbohydrate metabolic process	GO:0004553	hydrolase activity, hydrolyzing O-glycosyl compounds	--	--	--	--	FALSE	-5.23483	0.244997	FALSE	-0.672365	0.875047	FALSE	-5.75408	0.101513	FALSE	2.49123	0.0110299	FALSE	1.76704
Cluster-11149.30816		1.42	0	0	0.8	0.2	463	1276267187	PIN23160.1	208	2.6e-14	UDP-glucuronosyl and UDP-glucosyl transferase [Handroanthus impetiginosus]	AP019298.1	AP019298	82	1.33e-32	Prunus dulcis DNA, pseudomolecule Pd02	K05841	E2.4.1.173	sterol 3beta-glucosyltransferase	http://www.genome.jp/dbget-bin/www_bget?ko:K05841	Q9XIG1	200	8.2e-15	Sterol 3-beta-glucosyltransferase UGT80B1 OS=Arabidopsis thaliana OX=3702 GN=UGT80B1 PE=2 SV=1	--	--	--	--	--	--	--	--	--	--	FALSE	-4.92245	0.380656	FALSE	1.47981	0.70386	FALSE	-3.29695	1	FALSE	1.45185	0.45901	FALSE	2.85449
Cluster-11149.30817		0.46	0.54	0.27	2.43	2.34	896	1600664664	TEY47020.1	180	8.7e-11	hypothetical protein Saspl_025043 [Salvia splendens]	XM_012225350.2	XM_012225350	41	1.66e-09	PREDICTED: Jatropha curcas sterol 3-beta-glucosyltransferase UGT80B1 (LOC105640935), transcript variant X4, mRNA	K05841	E2.4.1.173	sterol 3beta-glucosyltransferase	http://www.genome.jp/dbget-bin/www_bget?ko:K05841	--	--	--	--	--	--	--	--	--	--	--	--	--	--	FALSE	-1.93051	0.0317259	FALSE	-0.343295	0.884763	DOWN	-2.38102	0.00239242	FALSE	-1.70913	0.093697	FALSE	-2.09906
Cluster-11149.9398		2.32	0.52	0.69	1.44	18.79	1859	747057898	XP_011075272.1	1601	3e-175	beta-D-glucosyl crocetin beta-1,6-glucosyltransferase-like [Sesamum indicum]	XM_012978904.1	XM_012978904	149	3.22e-69	PREDICTED: Erythranthe guttatus beta-D-glucosyl crocetin beta-1,6-glucosyltransferase-like (LOC105955200), mRNA	K21354	-	-	http://www.genome.jp/dbget-bin/www_bget?ko:K21354	F8WKW8	1081	2.3e-116	Beta-D-glucosyl crocetin beta-1,6-glucosyltransferase OS=Gardenia jasminoides OX=114476 GN=UGT94E5 PE=1 SV=1	PF00201//PF04101//PF03033	UDP-glucoronosyl and UDP-glucosyl transferase//Glycosyltransferase family 28 C-terminal domain//Glycosyltransferase family 28 N-terminal domain	GO:0005975//GO:0030259	carbohydrate metabolic process//lipid glycosylation	GO:0016758	transferase activity, transferring hexosyl groups	--	--	--	--	FALSE	-1.2645	0.125942	DOWN	-4.09658	8.53e-15	DOWN	-5.47031	1.88e-21	FALSE	1.3549	0.0341502	DOWN	-2.79114
Cluster-5282.1		0	0	0	0.23	1.27	623	1343974040	XP_023871164.1	402	1.1e-36	ceramide glucosyltransferase-like [Quercus suber]	XM_009223911.1	XM_009223911	68	1.11e-24	Gaeumannomyces tritici R3-111a-1 ceramide glucosyltransferase mRNA	--	--	--	--	G4MS28	528	1e-52	Ceramide glucosyltransferase OS=Magnaporthe oryzae (strain 70-15 / ATCC MYA-4617 / FGSC 8958) OX=242507 GN=MGG_10668 PE=1 SV=1	PF13506	Glycosyl transferase family 21	--	--	GO:0016757	transferase activity, transferring glycosyl groups	--	--	--	--	FALSE	-3.96925	0.835728	FALSE	-2.7982	0.0413052	FALSE	-6.61635	0.00586292	FALSE	-3.80692	0.806498	FALSE	-6.37819
Cluster-5282.2		0	0	0	0	2.25	461	1344012456	XP_023888827.1	403	6.2e-37	ceramide glucosyltransferase-like [Quercus suber]	--	--	--	--	--	--	--	--	--	G4MS28	465	1.5e-45	Ceramide glucosyltransferase OS=Magnaporthe oryzae (strain 70-15 / ATCC MYA-4617 / FGSC 8958) OX=242507 GN=MGG_10668 PE=1 SV=1	--	--	--	--	--	--	--	--	KOG2547	Ceramide glucosyltransferase	FALSE	-5.13e-15	1	FALSE	-6.70126	0.00966091	FALSE	-6.61635	0.00586292	FALSE	0	1	FALSE	-6.37819
Cluster-11149.39476		0.67	1.15	1.3	1.47	1.05	825	1391290468	XP_025013471.1	472	1.1e-44	sterol 3-beta-glucosyltransferase UGT80A2 isoform X3 [Ricinus communis]	AP020938.1	AP020938	40	5.46e-09	Prunus dulcis DNA, unplaced-scaffold_601	-	-	-	http://www.genome.jp/dbget-bin/www_bget?ko:-	P04146	183	1.4e-12	Copia protein OS=Drosophila melanogaster OX=7227 GN=GIP PE=1 SV=3	--	--	--	--	--	--	--	--	--	--	FALSE	-0.150049	1	FALSE	0.0892652	1	FALSE	-0.170521	1	FALSE	-0.468453	0.956639	FALSE	-0.42803
Cluster-11149.6813		1.97	1.2	1.81	1.96	0.82	1200	1353881046	PQP96358.1	164	8.4e-09	sterol 3-beta-glucosyltransferase UGT80A2 [Prunus yedoensis var. nudiflora]	XM_020694623.1	XM_020694623	70	1.69e-25	PREDICTED: Sesamum indicum sterol 3-beta-glucosyltransferase UGT80A2-like (LOC105163501), transcript variant X3, mRNA	K05841	E2.4.1.173	sterol 3beta-glucosyltransferase	http://www.genome.jp/dbget-bin/www_bget?ko:K05841	Q9M8Z7	157	2.1e-09	Sterol 3-beta-glucosyltransferase UGT80A2 OS=Arabidopsis thaliana OX=3702 GN=UGT80A2 PE=1 SV=1	PF03616	Sodium/glutamate symporter	GO:0015813//GO:0015846//GO:0006814	L-glutamate transmembrane transport//polyamine transport//sodium ion transport	GO:0015501	glutamate:sodium symporter activity	GO:0016021	integral component of membrane	--	--	FALSE	-0.494238	0.797201	FALSE	0.861999	0.380302	FALSE	0.257509	0.92366	FALSE	0.676416	0.479715	FALSE	1.48725
Cluster-11149.46241		0	0.27	0	5.65	0	407	--	--	--	--	--	XM_020696073.1	XM_020696073	49	2.56e-14	PREDICTED: Sesamum indicum UDP-glucose:glycoprotein glucosyltransferase (LOC105169128), mRNA	--	--	--	--	--	--	--	--	--	--	--	--	--	--	--	--	--	--	DOWN	-3.98252	0.00343082	UP	7.20537	0.000498776	FALSE	3.0555	1	DOWN	-7.10282	0.00112412	FALSE	0
Cluster-11149.28549		2.94	8.19	3.37	44.75	25.44	1718	1276248697	PIN07991.1	1078	1.2e-114	UDP-glucuronosyl and UDP-glucosyl transferase [Handroanthus impetiginosus]	XM_011089903.2	XM_011089903	526	0	PREDICTED: Sesamum indicum limonoid UDP-glucosyltransferase (LOC105169502), mRNA	-	-	-	http://www.genome.jp/dbget-bin/www_bget?ko:-	V5LLZ9	953	1.5e-101	Gallate 1-beta-glucosyltransferase OS=Quercus robur OX=38942 GN=UGT84A13 PE=1 SV=1	PF00201	UDP-glucoronosyl and UDP-glucosyl transferase	--	--	GO:0016758	transferase activity, transferring hexosyl groups	--	--	--	--	DOWN	-2.24699	5.17e-06	FALSE	0.417883	0.618054	DOWN	-1.93978	5.63e-05	DOWN	-3.2512	8.64e-11	DOWN	-2.88308
Cluster-11149.43854		0	1.71	0.41	0.87	0.44	346	1276261339	PIN18202.1	144	5e-07	UDP-glucose:glycoprotein glucosyltransferase [Handroanthus impetiginosus]	--	--	--	--	--	K11718	HUGT	UDP-glucose:glycoprotein glucosyltransferase	http://www.genome.jp/dbget-bin/www_bget?ko:K11718	Q0WL80	121	8.9e-06	UDP-glucose:glycoprotein glucosyltransferase OS=Arabidopsis thaliana OX=3702 GN=UGGT PE=1 SV=1	--	--	--	--	--	--	--	--	--	--	FALSE	1.20913	1	FALSE	0.528852	1	FALSE	1.62216	0.603248	FALSE	-3.80692	0.806498	FALSE	-3.08254
Cluster-11149.29065		13.25	23.27	18.83	54.45	21.38	2029	747104433	XP_011100453.1	1673	1.5e-183	anthocyanidin 3-O-glucosyltransferase 2-like [Sesamum indicum]	--	--	--	--	--	-	-	-	http://www.genome.jp/dbget-bin/www_bget?ko:-	Q6VAB2	1194	2e-129	UDP-glycosyltransferase 71E1 OS=Stevia rebaudiana OX=55670 GN=UGT71E1 PE=2 SV=1	PF00201	UDP-glucoronosyl and UDP-glucosyl transferase	--	--	GO:0016758	transferase activity, transferring hexosyl groups	--	--	--	--	FALSE	-1.02489	0.0729236	FALSE	0.952285	0.0907098	FALSE	-0.183372	0.856522	FALSE	-1.36444	0.00886019	FALSE	-0.462148
Cluster-13950.0		0	1.35	2.13	0	0	341	747086787	XP_011090909.1	462	6.6e-44	beta-D-glucosyl crocetin beta-1,6-glucosyltransferase-like [Sesamum indicum]	--	--	--	--	--	-	-	-	http://www.genome.jp/dbget-bin/www_bget?ko:-	Q5NTH0	364	5.8e-34	Cyanidin-3-O-glucoside 2-O-glucuronosyltransferase OS=Bellis perennis OX=41492 GN=UGAT PE=1 SV=1	PF06917//PF04101//PF00201	Periplasmic pectate lyase//Glycosyltransferase family 28 C-terminal domain//UDP-glucoronosyl and UDP-glucosyl transferase	GO:0045490	pectin catabolic process	GO:0016837//GO:0016758	carbon-oxygen lyase activity, acting on polysaccharides//transferase activity, transferring hexosyl groups	GO:0042597	periplasmic space	--	--	FALSE	4.77656	0.566119	FALSE	0	1	FALSE	4.51988	0.441562	FALSE	0	1	FALSE	0
Cluster-11149.43580		0.63	0.95	0.31	1.7	0.63	524	565377115	XP_006355035.1	443	1.6e-41	PREDICTED: zeatin O-xylosyltransferase-like [Solanum tuberosum]	--	--	--	--	--	K13495	CISZOG	cis-zeatin O-glucosyltransferase	http://www.genome.jp/dbget-bin/www_bget?ko:K13495	Q9ZSK5	261	7.8e-22	Zeatin O-glucosyltransferase OS=Phaseolus lunatus OX=3884 GN=ZOG1 PE=2 SV=1	--	--	--	--	--	--	--	--	--	--	FALSE	-0.598686	0.999455	FALSE	1.01287	0.677692	FALSE	0.305661	1	FALSE	-0.763349	0.806498	FALSE	0.198437
Cluster-11149.33352		8.5	10.53	2.51	339.8	321.35	863	747092623	XP_011094086.1	333	1.5e-28	beta-glucosidase-like [Sesamum indicum]	XM_011095783.2	XM_011095783	89	3.3e-36	PREDICTED: Sesamum indicum beta-glucosidase (LOC105173882), mRNA	K12695	RG	raucaffricine beta-D-glucosidase / vomilenine glucosyltransferase [EC:3.2.1.125 2.4.1.219]	http://www.genome.jp/dbget-bin/www_bget?ko:K12695	Q9SPP9	241	2.7e-19	Raucaffricine-O-beta-D-glucosidase OS=Rauvolfia serpentina OX=4060 GN=RG PE=1 SV=1	PF00232	Glycosyl hydrolase family 1	GO:0005975	carbohydrate metabolic process	GO:0004553	hydrolase activity, hydrolyzing O-glycosyl compounds	--	--	--	--	DOWN	-4.80115	1.03e-20	FALSE	-0.317834	0.753024	DOWN	-5.22954	7.83e-24	DOWN	-4.65125	1.33e-19	DOWN	-5.01887
Cluster-11149.34595		6.47	16.48	4.61	15.95	62.06	2043	747082805	XP_011088741.1	1893	4.6e-209	scopoletin glucosyltransferase-like [Sesamum indicum]	XM_011090439.2	XM_011090439	448	0	PREDICTED: Sesamum indicum scopoletin glucosyltransferase-like (LOC105169885), mRNA	-	-	-	http://www.genome.jp/dbget-bin/www_bget?ko:-	Q9AT54	1371	6e-150	Scopoletin glucosyltransferase OS=Nicotiana tabacum OX=4097 GN=TOGT1 PE=1 SV=1	PF04101//PF00520//PF00201	Glycosyltransferase family 28 C-terminal domain//Ion transport protein//UDP-glucoronosyl and UDP-glucosyl transferase	GO:0006811//GO:0055085	ion transport//transmembrane transport	GO:0005216//GO:0016758	ion channel activity//transferase activity, transferring hexosyl groups	GO:0016020	membrane	--	--	FALSE	0.248891	0.884802	DOWN	-2.35633	1.11e-06	DOWN	-2.21819	2.55e-06	FALSE	-0.627646	0.364516	DOWN	-3.03387
Cluster-11149.36091		1.95	8.55	7.13	6.54	7.7	1836	747098400	XP_011097210.1	1811	1.3e-199	anthocyanidin 3-O-glucosyltransferase 5-like [Sesamum indicum]	XM_011098908.2	XM_011098908	458	0	PREDICTED: Sesamum indicum anthocyanidin 3-O-glucosyltransferase 5-like (LOC105176179), mRNA	-	-	-	http://www.genome.jp/dbget-bin/www_bget?ko:-	Q40287	1264	1.4e-137	Anthocyanidin 3-O-glucosyltransferase 5 OS=Manihot esculenta OX=3983 GN=GT5 PE=2 SV=1	PF00201	UDP-glucoronosyl and UDP-glucosyl transferase	--	--	GO:0016758	transferase activity, transferring hexosyl groups	--	--	--	--	FALSE	0.587914	0.443036	FALSE	-0.631583	0.363362	FALSE	-0.154418	0.908906	FALSE	-1.07241	0.0866777	DOWN	-1.75368
Cluster-11149.23795		192.95	48.15	69.56	73.51	104.84	1612	1173771462	XP_020553472.1	1317	2.3e-142	beta-glucosidase isoform X2 [Sesamum indicum]	XM_011095783.2	XM_011095783	154	4.62e-72	PREDICTED: Sesamum indicum beta-glucosidase (LOC105173882), mRNA	K12695	RG	raucaffricine beta-D-glucosidase / vomilenine glucosyltransferase [EC:3.2.1.125 2.4.1.219]	http://www.genome.jp/dbget-bin/www_bget?ko:K12695	Q8GVD0	1072	2.2e-115	Oleuropein beta-glucosidase OS=Olea europaea OX=4146 GN=GLU PE=1 SV=1	PF00232	Glycosyl hydrolase family 1	GO:0005975	carbohydrate metabolic process	GO:0004553	hydrolase activity, hydrolyzing O-glycosyl compounds	--	--	--	--	FALSE	-0.407445	0.651408	FALSE	-0.908822	0.1114	DOWN	-1.42704	0.0031107	UP	2.06561	1.96e-05	FALSE	1.10678
Cluster-11149.9809		18.27	15.58	2.93	2.21	25.87	859	5763524	BAA83484.1	773	1.4e-79	UDP-glucose: flavonoid 7-O-glucosyltransferase [Scutellaria baicalensis]	XM_023116626.1	XM_023116626	73	2.58e-27	PREDICTED: Cucurbita maxima scopoletin glucosyltransferase-like (LOC111470963), mRNA	-	-	-	http://www.genome.jp/dbget-bin/www_bget?ko:-	Q9AT54	647	2.2e-66	Scopoletin glucosyltransferase OS=Nicotiana tabacum OX=4097 GN=TOGT1 PE=1 SV=1	PF00201	UDP-glucoronosyl and UDP-glucosyl transferase	--	--	GO:0016758	transferase activity, transferring hexosyl groups	--	--	--	--	UP	3.01867	4.39e-08	DOWN	-3.93823	1e-12	FALSE	-1.03052	0.0503036	UP	3.70579	1.89e-11	FALSE	-0.281958
Cluster-4437.0		0	0	0	0	2.66	477	1344045501	XP_023902797.1	478	1.3e-45	sterol 3-beta-glucosyltransferase-like [Quercus suber]	--	--	--	--	--	--	--	--	--	C4B4E5	609	3.2e-62	Sterol 3-beta-glucosyltransferase OS=Glomerella lagenarium OX=5462 GN=ATG26 PE=3 SV=1	--	--	--	--	--	--	--	--	--	--	FALSE	-5.13e-15	1	DOWN	-7.0462	0.00170683	DOWN	-6.96112	0.00152724	FALSE	0	1	DOWN	-6.72239
Cluster-11149.14041		11.78	9.18	13.09	15.78	14.9	5188	848858822	XP_012830327.1	1953	1.3e-215	PREDICTED: anthocyanidin 3-O-glucoside 2''-O-glucosyltransferase-like [Erythranthe guttata]	XM_011087728.2	XM_011087728	661	0	PREDICTED: Sesamum indicum transcription factor VOZ1-like (LOC105167878), transcript variant X5, mRNA	-	-	-	http://www.genome.jp/dbget-bin/www_bget?ko:-	A0A2R6QXF8	1408	7.8e-154	Cyanidin 3-O-galactoside 2''-O-xylosyltransferase FGGT1 OS=Actinidia chinensis var. chinensis OX=1590841 GN=F3GGT1 PE=1 SV=2	PF00531//PF00201	Death domain//UDP-glucoronosyl and UDP-glucosyl transferase	GO:0007165	signal transduction	GO:0005515//GO:0016758	protein binding//transferase activity, transferring hexosyl groups	--	--	--	--	FALSE	-0.581445	0.41919	FALSE	-0.313661	0.7644	FALSE	-1.00587	0.0467373	FALSE	0.255552	0.841577	FALSE	-0.108111
Cluster-11149.25564		4.28	5.39	4.46	6.06	5.31	6764	1276254278	PIN12344.1	640	3e-63	Glycosyltransferase [Handroanthus impetiginosus]	XM_011093169.2	XM_011093169	314	2.25e-160	PREDICTED: Sesamum indicum dolichyl-phosphate beta-glucosyltransferase (LOC105171912), mRNA	K00729	ALG5	dolichyl-phosphate beta-glucosyltransferase	http://www.genome.jp/dbget-bin/www_bget?ko:K00729	Q9DB25	264	4.6e-21	Dolichyl-phosphate beta-glucosyltransferase OS=Mus musculus OX=10090 GN=Alg5 PE=1 SV=1	PF07421	Neurotensin/neuromedin N precursor	GO:0007218	neuropeptide signaling pathway	GO:0005184	neuropeptide hormone activity	GO:0005576	extracellular region	KOG2977	Glycosyltransferase	FALSE	0.0304363	1	FALSE	-0.207349	0.908623	FALSE	-0.287678	0.705108	FALSE	0.17817	0.975361	FALSE	-0.0791765
Cluster-11149.10963		3.3	1.34	3.53	5.36	3.6	909	1276266693	PIN22754.1	514	1.6e-49	UDP-glucuronosyl and UDP-glucosyl transferase [Handroanthus impetiginosus]	XM_011084809.2	XM_011084809	240	4e-120	PREDICTED: Sesamum indicum sterol 3-beta-glucosyltransferase UGT80A2-like (LOC105165710), transcript variant X2, mRNA	K05841	E2.4.1.173	sterol 3beta-glucosyltransferase	http://www.genome.jp/dbget-bin/www_bget?ko:K05841	Q9M8Z7	486	1.1e-47	Sterol 3-beta-glucosyltransferase UGT80A2 OS=Arabidopsis thaliana OX=3702 GN=UGT80A2 PE=1 SV=1	PF03033	Glycosyltransferase family 28 N-terminal domain	GO:0030259//GO:0005975	lipid glycosylation//carbohydrate metabolic process	GO:0016758	transferase activity, transferring hexosyl groups	--	--	--	--	FALSE	-1.78998	0.00741613	FALSE	0.175825	1	FALSE	-1.72357	0.00923724	FALSE	-0.0298634	1	FALSE	0.0959921
Cluster-11149.44758		1.52	0.65	0.5	31.71	45.62	1040	747092744	XP_011094151.1	986	3.5e-104	beta-glucosidase isoform X1 [Sesamum indicum]	XM_011095783.2	XM_011095783	212	1.69e-104	PREDICTED: Sesamum indicum beta-glucosidase (LOC105173882), mRNA	K12695	RG	raucaffricine beta-D-glucosidase / vomilenine glucosyltransferase [EC:3.2.1.125 2.4.1.219]	http://www.genome.jp/dbget-bin/www_bget?ko:K12695	Q8GVD0	716	2.7e-74	Oleuropein beta-glucosidase OS=Olea europaea OX=4146 GN=GLU PE=1 SV=1	PF00232	Glycosyl hydrolase family 1	GO:0005975	carbohydrate metabolic process	GO:0004553	hydrolase activity, hydrolyzing O-glycosyl compounds	--	--	--	--	DOWN	-5.39306	2.89e-19	FALSE	-0.922616	0.110417	DOWN	-6.42364	6.1e-26	DOWN	-3.7042	1.28e-11	DOWN	-4.67583
Cluster-11149.37080		64.26	15.47	6.77	514.18	452.41	429	747092623	XP_011094086.1	474	3.4e-45	beta-glucosidase-like [Sesamum indicum]	XM_012995761.1	XM_012995761	83	3.41e-33	PREDICTED: Erythranthe guttatus raucaffricine-O-beta-D-glucosidase-like (LOC105970933), mRNA	K12695	RG	raucaffricine beta-D-glucosidase / vomilenine glucosyltransferase [EC:3.2.1.125 2.4.1.219]	http://www.genome.jp/dbget-bin/www_bget?ko:K12695	Q8GVD0	363	9.5e-34	Oleuropein beta-glucosidase OS=Olea europaea OX=4146 GN=GLU PE=1 SV=1	PF00232	Glycosyl hydrolase family 1	GO:0005975	carbohydrate metabolic process	GO:0004553	hydrolase activity, hydrolyzing O-glycosyl compounds	--	--	--	--	DOWN	-4.80856	6e-20	FALSE	-0.21711	0.886399	DOWN	-5.13594	2.66e-22	DOWN	-2.3516	1.54e-06	DOWN	-2.61862
Cluster-11149.13208		1.52	0.23	0.62	3.25	32.01	1756	747057898	XP_011075272.1	1575	3e-172	beta-D-glucosyl crocetin beta-1,6-glucosyltransferase-like [Sesamum indicum]	XM_011076970.2	XM_011076970	548	0	PREDICTED: Sesamum indicum beta-D-glucosyl crocetin beta-1,6-glucosyltransferase-like (LOC105159784), mRNA	K21354	-	-	http://www.genome.jp/dbget-bin/www_bget?ko:K21354	A0A0A6ZFY4	1026	5.2e-110	UDP-glucosyltransferase 29 OS=Panax ginseng OX=4054 GN=UGT29 PE=1 SV=1	PF00201//PF03033//PF04101	UDP-glucoronosyl and UDP-glucosyl transferase//Glycosyltransferase family 28 N-terminal domain//Glycosyltransferase family 28 C-terminal domain	GO:0005975//GO:0030259	carbohydrate metabolic process//lipid glycosylation	GO:0016758	transferase activity, transferring hexosyl groups	--	--	--	--	DOWN	-3.57542	1.1e-07	DOWN	-3.69464	3.26e-13	DOWN	-7.37684	2.01e-30	FALSE	-0.423156	0.746548	DOWN	-4.16718
Cluster-15009.0		0.45	0.46	0.46	0.07	0	818	--	--	--	--	--	--	--	--	--	--	--	--	--	--	--	--	--	--	PF09198	Bacteriophage T4 beta-glucosyltransferase	GO:0099018	restriction-modification system evasion by virus	GO:0033821	DNA beta-glucosyltransferase activity	--	--	--	--	FALSE	2.69146	0.394512	FALSE	2.9964	1	FALSE	5.48809	0.101513	FALSE	3.08066	0.272497	FALSE	5.71856
Cluster-11149.41562		4.74	6.37	4.38	4.5	12.9	4706	1276235262	PIM98745.1	881	2.4e-91	putative Ca2+-dependent phospholipid-binding protein [Handroanthus impetiginosus]	XM_012975185.1	XM_012975185	236	3.57e-117	PREDICTED: Erythranthe guttatus probable ADP-ribosylation factor GTPase-activating protein AGD11 (LOC105951733), mRNA	K12486	SMAP	stromal membrane-associated protein	http://www.genome.jp/dbget-bin/www_bget?ko:K12486	Q8L7A4	737	4.5e-76	Probable ADP-ribosylation factor GTPase-activating protein AGD11 OS=Arabidopsis thaliana OX=3702 GN=AGD11 PE=2 SV=1	PF01412//PF09198	Putative GTPase activating protein for Arf//Bacteriophage T4 beta-glucosyltransferase	GO:0099018	restriction-modification system evasion by virus	GO:0005096//GO:0033821	GTPase activator activity//DNA beta-glucosyltransferase activity	--	--	--	--	FALSE	0.702088	0.295867	DOWN	-1.91529	0.000108719	FALSE	-1.32396	0.00709111	FALSE	0.752944	0.237227	FALSE	-1.21229
Cluster-11149.1350		41.19	121.39	122.17	76.77	67.55	565	1340524743	XP_023742764.1	856	2.3e-89	polyubiquitin-like [Lactuca sativa]	XM_003650421.1	XM_003650421	332	1.75e-171	Thermothielavioides terrestris NRRL 8126 uncharacterized protein (THITE_2072392), mRNA	K08770	UBC	ubiquitin C	http://www.genome.jp/dbget-bin/www_bget?ko:K08770	P0CG63	842	3.6e-89	Polyubiquitin OS=Saccharomyces cerevisiae (strain ATCC 204508 / S288c) OX=559292 GN=UBI4 PE=1 SV=1	PF06427//PF00240//PF14560//PF04452	UDP-glucose:Glycoprotein Glucosyltransferase//Ubiquitin family//Ubiquitin-like domain//RNA methyltransferase	GO:0006364//GO:0006486	rRNA processing//protein glycosylation	GO:0003980//GO:0008168//GO:0005515	UDP-glucose:glycoprotein glucosyltransferase activity//methyltransferase activity//protein binding	--	--	KOG0001	Ubiquitin and ubiquitin-like proteins	FALSE	0.884137	0.14942	FALSE	-0.215287	0.900948	FALSE	0.558068	0.345394	FALSE	-0.237722	0.886936	FALSE	-0.502974
Cluster-11149.1351		0.7	0.74	0.7	2.04	26.36	489	1189390482	OSX77439.1	807	9.4e-84	hypothetical protein BU14_0148s0015 [Porphyra umbilicalis]	XM_008034885.1	XM_008034885	308	3.28e-158	Trametes versicolor FP-101664 SS1 ubiquitin mRNA	K08770	UBC	ubiquitin C	http://www.genome.jp/dbget-bin/www_bget?ko:K08770	P0CG74	807	3.6e-85	Polyubiquitin OS=Candida albicans OX=5476 GN=UBI4 PE=1 SV=1	PF04452//PF14560//PF00240//PF06427	RNA methyltransferase//Ubiquitin-like domain//Ubiquitin family//UDP-glucose:Glycoprotein Glucosyltransferase	GO:0006486//GO:0006364	protein glycosylation//rRNA processing	GO:0003980//GO:0005515//GO:0008168	UDP-glucose:glycoprotein glucosyltransferase activity//protein binding//methyltransferase activity	--	--	KOG0001	Ubiquitin and ubiquitin-like proteins	FALSE	-1.20819	0.58123	DOWN	-4.07921	7.57e-11	DOWN	-5.39115	2.95e-14	FALSE	-0.872014	0.806498	DOWN	-4.9929
Cluster-11149.43341		1.26	3.95	2.08	1.76	1.72	2124	1023988143	KZV24297.1	2275	2.4e-253	hypothetical protein F511_01779 [Dorcoceras hygrometricum]	XM_011086410.2	XM_011086410	1051	0	PREDICTED: Sesamum indicum sterol 3-beta-glucosyltransferase UGT80A2-like (LOC105166897), transcript variant X1, mRNA	-	-	-	http://www.genome.jp/dbget-bin/www_bget?ko:-	Q9M8Z7	1863	5.5e-207	Sterol 3-beta-glucosyltransferase UGT80A2 OS=Arabidopsis thaliana OX=3702 GN=UGT80A2 PE=1 SV=1	PF00201//PF03033	UDP-glucoronosyl and UDP-glucosyl transferase//Glycosyltransferase family 28 N-terminal domain	GO:0005975//GO:0030259	carbohydrate metabolic process//lipid glycosylation	GO:0016758	transferase activity, transferring hexosyl groups	--	--	--	--	FALSE	1.36928	0.021194	FALSE	-0.367469	0.764853	FALSE	0.890973	0.13531	FALSE	0.200868	0.98793	FALSE	-0.216419
Cluster-11149.9370		1.4	0.68	0.65	8.81	11.35	374	--	--	--	--	--	XM_012974669.1	XM_012974669	68	6.4e-25	PREDICTED: Erythranthe guttatus anthocyanidin 3-O-glucosyltransferase 2-like (LOC105951268), mRNA	--	--	--	--	--	--	--	--	--	--	--	--	--	--	--	--	--	--	DOWN	-3.36438	0.00232302	FALSE	-0.765334	0.444528	DOWN	-4.22546	2.83e-05	FALSE	-1.99542	0.103747	DOWN	-2.80431
Cluster-2319.0		1.11	1.99	1.21	3.78	11.36	647	1338463287	PON85344.1	1024	8.5e-109	Ubiquitin, partial [Trema orientale]	XM_003052529.1	XM_003052529	491	0	Nectria haematococca mpVI 77-13-4 predicted protein, mRNA	K08770	UBC	ubiquitin C	http://www.genome.jp/dbget-bin/www_bget?ko:K08770	P0CG74	1024	3.2e-110	Polyubiquitin OS=Candida albicans OX=5476 GN=UBI4 PE=1 SV=1	PF06427//PF00240//PF08506//PF14560//PF04452	UDP-glucose:Glycoprotein Glucosyltransferase//Ubiquitin family//Cse1//Ubiquitin-like domain//RNA methyltransferase	GO:0006486//GO:0006886//GO:0006364	protein glycosylation//intracellular protein transport//rRNA processing	GO:0008168//GO:0005515//GO:0003980	methyltransferase activity//protein binding//UDP-glucose:glycoprotein glucosyltransferase activity	--	--	KOG0001	Ubiquitin and ubiquitin-like proteins	FALSE	-0.708314	0.596771	DOWN	-1.9806	0.000912898	DOWN	-2.79822	3.06e-06	FALSE	-1.09607	0.362672	DOWN	-3.12383
Cluster-2319.1		1.42	0.26	0	1.13	13.6	402	1335041798	PNW76412.1	651	9.5e-66	hypothetical protein CHLRE_11g467567v5 [Chlamydomonas reinhardtii]	XM_013899147.1	XM_013899147	287	1.26e-146	Thecamonas trahens ATCC 50062 hypothetical protein partial mRNA	K08770	UBC	ubiquitin C	http://www.genome.jp/dbget-bin/www_bget?ko:K08770	P0CG71	663	1.5e-68	Polyubiquitin-A OS=Caenorhabditis elegans OX=6239 GN=ubq-1 PE=3 SV=1	PF04452//PF14560//PF00240//PF06427	RNA methyltransferase//Ubiquitin-like domain//Ubiquitin family//UDP-glucose:Glycoprotein Glucosyltransferase	GO:0006486//GO:0006364	protein glycosylation//rRNA processing	GO:0003980//GO:0005515//GO:0008168	UDP-glucose:glycoprotein glucosyltransferase activity//protein binding//methyltransferase activity	--	--	KOG0001	Ubiquitin and ubiquitin-like proteins	FALSE	-1.75054	0.744832	DOWN	-3.94044	1.63e-06	DOWN	-5.77268	5.85e-08	FALSE	0.946694	0.841577	DOWN	-3.03528
Cluster-11149.22736		3.85	5.23	7.92	6.94	6.49	915	1600675962	TEY58105.1	274	1.1e-21	hypothetical protein Saspl_004608 [Salvia splendens]	XM_011084809.2	XM_011084809	112	5.75e-49	PREDICTED: Sesamum indicum sterol 3-beta-glucosyltransferase UGT80A2-like (LOC105165710), transcript variant X2, mRNA	K05841	E2.4.1.173	sterol 3beta-glucosyltransferase	http://www.genome.jp/dbget-bin/www_bget?ko:K05841	Q9M8Z7	167	1.1e-10	Sterol 3-beta-glucosyltransferase UGT80A2 OS=Arabidopsis thaliana OX=3702 GN=UGT80A2 PE=1 SV=1	--	--	--	--	--	--	--	--	--	--	FALSE	-0.199828	1	FALSE	-0.300361	0.813895	FALSE	-0.610736	0.369075	FALSE	-0.181339	1	FALSE	-0.531477
Cluster-11149.25965		14.23	29.06	22.39	19.25	15.34	616	164457705	BAF96583.1	405	4.9e-37	lignan glucosyltransferase [Sesamum radiatum]	--	--	--	--	--	-	-	-	http://www.genome.jp/dbget-bin/www_bget?ko:-	D3UAG1	272	4.9e-23	UDP-glycosyltransferase 71A16 OS=Pyrus communis OX=23211 GN=UGT71A16 PE=1 SV=1	PF00201	UDP-glucoronosyl and UDP-glucosyl transferase	--	--	GO:0016758	transferase activity, transferring hexosyl groups	--	--	--	--	FALSE	0.813172	0.226395	FALSE	-0.0719161	1	FALSE	0.630477	0.300475	FALSE	0.22613	0.939495	FALSE	0.104235
Cluster-11149.8227		5.42	3.56	5.68	5.4	2.92	342	1279001270	XP_022860931.1	275	3.2e-22	beta-glucosidase-like [Olea europaea var. sylvestris]	--	--	--	--	--	K12695	RG	raucaffricine beta-D-glucosidase / vomilenine glucosyltransferase [EC:3.2.1.125 2.4.1.219]	http://www.genome.jp/dbget-bin/www_bget?ko:K12695	Q8GVD0	247	2.1e-20	Oleuropein beta-glucosidase OS=Olea europaea OX=4146 GN=GLU PE=1 SV=1	PF00232	Glycosyl hydrolase family 1	GO:0005975	carbohydrate metabolic process	GO:0004553	hydrolase activity, hydrolyzing O-glycosyl compounds	--	--	--	--	FALSE	-0.31524	1	FALSE	0.477721	0.944538	FALSE	0.0535327	1	FALSE	0.62266	0.806498	FALSE	1.0481
Cluster-7370.0		3.1	0	0	0	0	302	747086787	XP_011090909.1	415	1.6e-38	beta-D-glucosyl crocetin beta-1,6-glucosyltransferase-like [Sesamum indicum]	--	--	--	--	--	K21354	-	-	http://www.genome.jp/dbget-bin/www_bget?ko:K21354	A0A0A6ZFY4	168	2.7e-11	UDP-glucosyltransferase 29 OS=Panax ginseng OX=4054 GN=UGT29 PE=1 SV=1	--	--	--	--	--	--	--	--	--	--	FALSE	-5.13e-15	1	FALSE	0	1	FALSE	0	1	FALSE	5.41351	0.233253	FALSE	5.14723
Cluster-11149.41687		0.98	0.64	0.3	72.37	78.34	988	747092623	XP_011094086.1	1281	2.1e-138	beta-glucosidase-like [Sesamum indicum]	--	--	--	--	--	K12695	RG	raucaffricine beta-D-glucosidase / vomilenine glucosyltransferase [EC:3.2.1.125 2.4.1.219]	http://www.genome.jp/dbget-bin/www_bget?ko:K12695	Q8GVD0	938	4.7e-100	Oleuropein beta-glucosidase OS=Olea europaea OX=4146 GN=GLU PE=1 SV=1	PF00232	Glycosyl hydrolase family 1	GO:0005975	carbohydrate metabolic process	GO:0004553	hydrolase activity, hydrolyzing O-glycosyl compounds	--	--	--	--	DOWN	-6.60652	5.84e-27	FALSE	-0.512256	0.48761	DOWN	-7.22648	4.09e-31	DOWN	-5.52633	1.02e-21	DOWN	-6.08693
[truncated: 14 more columns]

## Sheet: UGT
Cluster-11149.24953	6423.95	10970.2	18564.9	15064.5	12083	838.1	1415.17	2352.09	1941.69	1550.08	585	1445360485	RDX60741.1	973	6.4e-103	Polyubiquitin 4, partial [Mucuna pruriens]	X67957.1	X67957	369	0	A.majus mRNA for ubiquitin (partial)	K08770	UBC	ubiquitin C	http://www.genome.jp/dbget-bin/www_bget?ko:K08770	P0CH33	973	2.4e-104	Polyubiquitin 11 OS=Arabidopsis thaliana OX=3702 GN=UBQ11 PE=2 SV=1	PF00240//PF14560//PF06427//PF04452	Ubiquitin family//Ubiquitin-like domain//UDP-glucose:Glycoprotein Glucosyltransferase//RNA methyltransferase	GO:0006364//GO:0006486	rRNA processing//protein glycosylation	GO:0005515//GO:0008168//GO:0003980	protein binding//methyltransferase activity//UDP-glucose:glycoprotein glucosyltransferase activity	--	--	KOG0001	Ubiquitin and ubiquitin-like proteins	FALSE	-1.26712	0.0167985	FALSE	-0.123222	1	DOWN	-1.50112	0.00166639	FALSE
Cluster-11149.35972	124	223	401	630	83	3.73	6.73	11.56	18.52	2.4	1714	747060635	XP_011076757.1	2019	9.5e-224	7-deoxyloganetic acid glucosyltransferase-like [Sesamum indicum]	XM_011078455.2	XM_011078455	631	0	PREDICTED: Sesamum indicum 7-deoxyloganetic acid glucosyltransferase-like (LOC105160927), mRNA	K21373	-	-	http://www.genome.jp/dbget-bin/www_bget?ko:K21373	U3U992	1387	7e-152	7-deoxyloganetic acid glucosyltransferase OS=Catharanthus roseus OX=4058 GN=UGT709C2 PE=1 SV=1	PF00201	UDP-glucoronosyl and UDP-glucosyl transferase	--	--	GO:0016758	transferase activity, transferring hexosyl groups	--	--	--	--	FALSE	-1.42852	0.00985796	FALSE	-1.07613	0.0553604	DOWN	-2.6152	8.93e-08	DOWN
Cluster-11149.10497	152	66	1381	534	51	4.06	1.77	35.31	13.92	1.31	1900	1276271137	PIN26572.1	1324	4.1e-143	UDP-glucuronosyl and UDP-glucosyl transferase [Handroanthus impetiginosus]	XM_009776711.1	XM_009776711	86	3.46e-34	PREDICTED: Nicotiana sylvestris crocetin glucoside glucosyltransferase-like (LOC104224973), mRNA	K21354	-	-	http://www.genome.jp/dbget-bin/www_bget?ko:K21354	F8WKW8	1088	3.6e-117	Beta-D-glucosyl crocetin beta-1,6-glucosyltransferase OS=Gardenia jasminoides OX=114476 GN=UGT94E5 PE=1 SV=1	PF04101//PF00201//PF03033	Glycosyltransferase family 28 C-terminal domain//UDP-glucoronosyl and UDP-glucosyl transferase//Glycosyltransferase family 28 N-terminal domain	GO:0030259//GO:0005975	lipid glycosylation//carbohydrate metabolic process	GO:0016758	transferase activity, transferring hexosyl groups	--	--	--	--	DOWN	-2.91872	3.59e-09	FALSE	0.946015	0.0967728	DOWN	-2.0833	2.14e-05	DOWN
[truncated: 18 more columns]
