# Supplementary material for: Transcriptome Analysis Provides Insights into Catalpol Biosynthesis in the Medicinal Plant Rehmannia glutinosa and the Functional Characterization of RgGES Genes
Source: Genes (Basel). 2024 Jan 24;15(2):155. doi: 10.3390/genes15020155 (PMC10888080; doi:10.3390/genes15020155)
Supplement: Supplementary file 1 [file genes-15-00155-s001.zip › Supplementary Table S9.xlsx]

## Sheet: Sheet1
Supplementary Table S9. Aldehyde dehydrogenase unigenes identified in R. glutinosa transcriptomes. The candidate aldehyde dehydrogenase genes participated in the production of catalpol were marked in red color.
gene_id	Fpkm(HFL)	Fpkm(BJL)	Fpkm(J9L)	Fpkm(J9R)	Fpkm(J9AR)	Gene Length	NR GI	NR ID	NR Score	NR Evalue	NR Description	NT GI	NT ID	NT Score	NT Evalue	NT Description	KO ID	KO Name	KO Description	Http Link	Swissprot ID	Swissprot Score	Swissprot Evalue	Swissprot Description	PFAM ID	PFAM description	Gene Ontology Biological Pathway	BP Description	Gene Ontology Molecular Function	MF Description	Gene Ontology Cellular Component	CC Description	KOG ID	KOG Description	UP_DOWN_REGULATION(BJ_LvsJ9_R)	log2FC(BJ_LvsJ9_R)	q value(BJ_LvsJ9_R)	UP_DOWN_REGULATION(J9_RvsJ9_X)	log2FC(J9_RvsJ9_X)	q value(J9_RvsJ9_X)	UP_DOWN_REGULATION(BJ_LvsJ9_X)	log2FC(BJ_LvsJ9_X)	q value(BJ_LvsJ9_X)	UP_DOWN_REGULATION(HF_LvsJ9_R)	log2FC(HF_LvsJ9_R)	q value(HF_LvsJ9_R)	UP_DOWN_REGULATION(HF_LvsJ9_X)	log2FC(HF_LvsJ9_X)	q value(HF_LvsJ9_X)
Cluster-11149.18542	26.78	31.91	36.12	32.41	11.54	3673	1276245749	PIN05748.1	4593	0	Xanthine dehydrogenase [Handroanthus impetiginosus]	XM_011082219.2	XM_011082219	1102	0	PREDICTED: Sesamum indicum indole-3-acetaldehyde oxidase (LOC105163763), mRNA	K09842	AAO3	abscisic-aldehyde oxidase	http://www.genome.jp/dbget-bin/www_bget?ko:K09842	Q7G193	3365	0	Indole-3-acetaldehyde oxidase OS=Arabidopsis thaliana OX=3702 GN=AAO1 PE=1 SV=2	PF05296//PF04644//PF00941//PF02738	Taste receptor protein (TAS2R)//Motilin/ghrelin//FAD binding domain in molybdopterin dehydrogenase//Molybdopterin-binding domain of aldehyde dehydrogenase	GO:0007186//GO:0050909//GO:0007165//GO:0055114	G protein-coupled receptor signaling pathway//sensory perception of taste//signal transduction//oxidation-reduction process	GO:0004930//GO:0016491//GO:0005179	G protein-coupled receptor activity//oxidoreductase activity//hormone activity	GO:0005576//GO:0016021	extracellular region//integral component of membrane	KOG0430	Xanthine dehydrogenase	FALSE	0.177637	0.988919	FALSE	1.09404	0.0437489	FALSE	1.16089	0.019215	FALSE	0.401243	0.663785	UP	1.44525	0.00303948
Cluster-11149.24587	22.11	46.39	41.84	14.94	8.25	1632	848892063	XP_012846124.1	1665	1e-182	PREDICTED: aspartate-semialdehyde dehydrogenase [Erythranthe guttata]	XM_011072255.2	XM_011072255	755	0	PREDICTED: Sesamum indicum aspartate-semialdehyde dehydrogenase (LOC105156186), mRNA	K00133	asd	aspartate-semialdehyde dehydrogenase	http://www.genome.jp/dbget-bin/www_bget?ko:K00133	Q55512	843	8e-89	Aspartate-semialdehyde dehydrogenase OS=Synechocystis sp. (strain PCC 6803 / Kazusa) OX=1111708 GN=asd PE=3 SV=2	PF02774//PF01118	Semialdehyde dehydrogenase, dimerisation domain//Semialdehyde dehydrogenase, NAD binding domain	GO:0008652//GO:0055114	cellular amino acid biosynthetic process//oxidation-reduction process	GO:0016620//GO:0046983//GO:0051287	oxidoreductase activity, acting on the aldehyde or oxo group of donors, NAD or NADP as acceptor//protein dimerization activity//NAD binding	--	--	KOG4777	Aspartate-semialdehyde dehydrogenase	UP	1.83772	0.000236023	FALSE	0.459036	0.570091	UP	2.18594	4.87e-06	FALSE	1.23919	0.0210799	UP	1.64814	0.000786003
Cluster-11149.24212	80.54	136.58	148.65	91.46	52.37	1788	747100318	XP_011098245.1	1093	2.4e-116	malate dehydrogenase, mitochondrial [Sesamum indicum]	XM_011084444.2	XM_011084444	461	0	PREDICTED: Sesamum indicum malate dehydrogenase, mitochondrial (LOC105165433), mRNA	K00026	MDH2	malate dehydrogenase	http://www.genome.jp/dbget-bin/www_bget?ko:K00026	P17783	1027	4e-110	Malate dehydrogenase, mitochondrial OS=Citrullus lanatus OX=3654 GN=MMDH PE=1 SV=1	PF01113//PF02605//PF01073//PF00056//PF02056//PF02866//PF01118	Dihydrodipicolinate reductase, N-terminus//Photosystem I reaction centre subunit XI//3-beta hydroxysteroid dehydrogenase/isomerase family//lactate/malate dehydrogenase, NAD binding domain//Family 4 glycosyl hydrolase//lactate/malate dehydrogenase, alpha/beta C-terminal domain//Semialdehyde dehydrogenase, NAD binding domain	GO:0055114//GO:0008207//GO:0015979//GO:0005975//GO:0008209//GO:0009085//GO:0006694//GO:0008210//GO:0009089	oxidation-reduction process//C21-steroid hormone metabolic process//photosynthesis//carbohydrate metabolic process//androgen metabolic process//lysine biosynthetic process//steroid biosynthetic process//estrogen metabolic process//lysine biosynthetic process via diaminopimelate	GO:0051287//GO:0016620//GO:0004553//GO:0016491//GO:0003854//GO:0008839//GO:0016616	NAD binding//oxidoreductase activity, acting on the aldehyde or oxo group of donors, NAD or NADP as acceptor//hydrolase activity, hydrolyzing O-glycosyl compounds//oxidoreductase activity//3-beta-hydroxy-delta5-steroid dehydrogenase activity//4-hydroxy-tetrahydrodipicolinate reductase//oxidoreductase activity, acting on the CH-OH group of donors, NAD or NADP as acceptor	GO:0009522//GO:0009538	photosystem I//photosystem I reaction center	KOG1494	NAD-dependent malate dehydrogenase	FALSE	0.78093	0.214013	FALSE	0.407962	0.622538	FALSE	1.07811	0.0304283	FALSE	0.490492	0.536096	FALSE	0.848438	0.104316
Cluster-11149.14737	1.28	1.02	2.07	0.8	0.31	1510	1371528470	PSS24542.1	206	1.4e-13	Aspartate-semialdehyde dehydrogenase [Actinidia chinensis var. chinensis]	XM_011088352.2	XM_011088352	87	7.6e-35	PREDICTED: Sesamum indicum uncharacterized LOC105168317 (LOC105168317), mRNA	-	-	-	http://www.genome.jp/dbget-bin/www_bget?ko:-	--	--	--	--	PF02089//PF07819	Palmitoyl protein thioesterase//PGAP1-like protein	--	--	GO:0098599//GO:0016788	palmitoyl hydrolase activity//hydrolase activity, acting on ester bonds	--	--	--	--	FALSE	0.536868	0.744832	FALSE	0.981967	0.484004	FALSE	1.40775	0.103436	FALSE	1.33667	0.0853218	UP	2.26574	0.00321385
Cluster-11149.20193	1.88	8.57	6.96	1.54	0.27	2768	747090403	XP_011092888.1	1565	6.8e-171	uncharacterized protein LOC105172963 isoform X1 [Sesamum indicum]	XM_020697346.1	XM_020697346	524	0	PREDICTED: Sesamum indicum anti-sigma-I factor RsgI6 (LOC105172963), transcript variant X2, mRNA	-	-	-	http://www.genome.jp/dbget-bin/www_bget?ko:-	Q84WT5	619	1.3e-62	Endo-1,4-beta-xylanase 5-like OS=Arabidopsis thaliana OX=3702 GN=At4g33820 PE=2 SV=1	PF00171//PF02018//PF00331	Aldehyde dehydrogenase family//Carbohydrate binding domain//Glycosyl hydrolase family 10	GO:0005975//GO:0055114	carbohydrate metabolic process//oxidation-reduction process	GO:0016491//GO:0016798//GO:0004553	oxidoreductase activity//hydrolase activity, acting on glycosyl bonds//hydrolase activity, hydrolyzing O-glycosyl compounds	--	--	--	--	UP	2.67518	1.43e-07	UP	2.09157	0.0016689	UP	4.65534	4.14e-16	FALSE	0.961904	0.148189	UP	3.00146	9.02e-07
Cluster-11149.35637	0.05	0.57	3.11	1.7	1.03	1171	747073416	XP_011083667.1	1267	1e-136	isoflavone reductase-like protein [Sesamum indicum]	EF626802.1	EF626802	357	0	Fraxinus excelsior Fra e 12.01 allergen mRNA, complete cds	-	-	-	http://www.genome.jp/dbget-bin/www_bget?ko:-	E1U332	1185	1.3e-128	Isoflavone reductase-like protein OS=Olea europaea OX=4146 PE=1 SV=1	PF02254//PF01370//PF01073//PF03435//PF01118	TrkA-N domain//NAD dependent epimerase/dehydratase family//3-beta hydroxysteroid dehydrogenase/isomerase family//Saccharopine dehydrogenase NADP binding domain//Semialdehyde dehydrogenase, NAD binding domain	GO:0006694//GO:0008210//GO:0008209//GO:0006813//GO:0008207//GO:0055114	steroid biosynthetic process//estrogen metabolic process//androgen metabolic process//potassium ion transport//C21-steroid hormone metabolic process//oxidation-reduction process	GO:0016620//GO:0050662//GO:0051287//GO:0003854//GO:0016491//GO:0003824//GO:0016616	oxidoreductase activity, acting on the aldehyde or oxo group of donors, NAD or NADP as acceptor//obsolete coenzyme binding//NAD binding//3-beta-hydroxy-delta5-steroid dehydrogenase activity//oxidoreductase activity//catalytic activity//oxidoreductase activity, acting on the CH-OH group of donors, NAD or NADP as acceptor	--	--	--	--	FALSE	-1.3523	0.137403	FALSE	0.323966	0.924529	FALSE	-1.13706	0.24251	DOWN	-4.40377	0.000319432	DOWN	-4.10502	0.000933103
Cluster-11149.18425	2.06	3.13	1.89	1.11	0.46	3160	1276247525	PIN07101.1	1653	4.8e-181	Serine/threonine protein kinase [Handroanthus impetiginosus]	XM_020697835.1	XM_020697835	821	0	PREDICTED: Sesamum indicum U-box domain-containing protein 35 (LOC105173852), transcript variant X2, mRNA	-	-	-	http://www.genome.jp/dbget-bin/www_bget?ko:-	Q8S8S7	898	6.5e-95	U-box domain-containing protein 34 OS=Arabidopsis thaliana OX=3702 GN=PUB34 PE=3 SV=1	PF00171//PF00069//PF00856//PF07714	Aldehyde dehydrogenase family//Protein kinase domain//SET domain//Protein tyrosine and serine/threonine kinase	GO:0055114//GO:0006468	oxidation-reduction process//protein phosphorylation	GO:0004672//GO:0005524//GO:0016491//GO:0005515	protein kinase activity//ATP binding//oxidoreductase activity//protein binding	--	--	--	--	UP	1.68885	0.00258829	FALSE	0.885665	0.265581	UP	2.46346	7.95e-06	FALSE	1.56034	0.00647315	UP	2.39514	1.58e-05
Cluster-11149.26315	107.11	200.52	432.84	2.85	0.5	593	508782101	EOY29357.1	195	1.1e-12	NADP-dependent glyceraldehyde-3-phosphate dehydrogenase isoform 2 [Theobroma cacao]	XM_023032381.1	XM_023032381	83	4.82e-33	PREDICTED: Olea europaea var. sylvestris NADP-dependent glyceraldehyde-3-phosphate dehydrogenase (LOC111403760), mRNA	K00131	gapN	glyceraldehyde-3-phosphate dehydrogenase (NADP+)	http://www.genome.jp/dbget-bin/www_bget?ko:K00131	P93338	189	2e-13	NADP-dependent glyceraldehyde-3-phosphate dehydrogenase OS=Nicotiana plumbaginifolia OX=4092 GN=GAPN PE=2 SV=1	PF00171	Aldehyde dehydrogenase family	GO:0055114	oxidation-reduction process	GO:0016491	oxidoreductase activity	--	--	--	--	UP	6.35	5.87e-28	FALSE	2.06988	0.0775526	UP	8.30761	3.12e-33	UP	5.88615	2.35e-24	UP	7.89722	3.13e-30
Cluster-11149.27253	403.05	338.67	787.43	6.67	1.65	1837	747074042	XP_011084003.1	1490	2.2e-162	NADP-dependent glyceraldehyde-3-phosphate dehydrogenase [Sesamum indicum]	XM_011085701.2	XM_011085701	612	0	PREDICTED: Sesamum indicum NADP-dependent glyceraldehyde-3-phosphate dehydrogenase (LOC105166364), mRNA	K00131	gapN	glyceraldehyde-3-phosphate dehydrogenase (NADP+)	http://www.genome.jp/dbget-bin/www_bget?ko:K00131	P93338	1429	1e-156	NADP-dependent glyceraldehyde-3-phosphate dehydrogenase OS=Nicotiana plumbaginifolia OX=4092 GN=GAPN PE=2 SV=1	PF00171	Aldehyde dehydrogenase family	GO:0055114	oxidation-reduction process	GO:0016491	oxidoreductase activity	--	--	KOG2450	Aldehyde dehydrogenase	UP	5.86702	2.9e-28	UP	1.61446	0.00408113	UP	7.3705	9.69e-38	UP	6.5898	2.62e-33	UP	8.15367	2.93e-43
Cluster-11149.25372	27.05	49.11	80.91	4.34	0.99	1862	1276258709	PIN16037.1	1944	5.1e-215	putative dehydrogenase [Handroanthus impetiginosus]	XM_011092545.2	XM_011092545	901	0	PREDICTED: Sesamum indicum divinyl chlorophyllide a 8-vinyl-reductase, chloroplastic (LOC105171428), mRNA	-	-	-	http://www.genome.jp/dbget-bin/www_bget?ko:-	J9RYI6	1539	1.8e-169	Divinyl chlorophyllide a 8-vinyl-reductase, chloroplastic OS=Cucumis sativus OX=3659 GN=DVR PE=1 SV=1	PF01073//PF03435//PF01113//PF01118//PF01370	3-beta hydroxysteroid dehydrogenase/isomerase family//Saccharopine dehydrogenase NADP binding domain//Dihydrodipicolinate reductase, N-terminus//Semialdehyde dehydrogenase, NAD binding domain//NAD dependent epimerase/dehydratase family	GO:0009089//GO:0008209//GO:0008210//GO:0006694//GO:0008207//GO:0055114//GO:0009085	lysine biosynthetic process via diaminopimelate//androgen metabolic process//estrogen metabolic process//steroid biosynthetic process//C21-steroid hormone metabolic process//oxidation-reduction process//lysine biosynthetic process	GO:0050662//GO:0016620//GO:0003824//GO:0008839//GO:0016616//GO:0051287//GO:0016491//GO:0003854	obsolete coenzyme binding//oxidoreductase activity, acting on the aldehyde or oxo group of donors, NAD or NADP as acceptor//catalytic activity//4-hydroxy-tetrahydrodipicolinate reductase//oxidoreductase activity, acting on the CH-OH group of donors, NAD or NADP as acceptor//NAD binding//oxidoreductase activity//3-beta-hydroxy-delta5-steroid dehydrogenase activity	--	--	--	--	UP	3.7	1.22e-13	UP	1.73803	0.00367661	UP	5.3269	9.48e-23	UP	3.31147	2.71e-11	UP	4.99856	2.79e-20
Cluster-11149.30351	13.69	11.88	13.25	5.65	2.75	2473	1276247154	PIN06823.1	1248	3.5e-134	Aldehyde dehydrogenase [Handroanthus impetiginosus]	XM_011092112.2	XM_011092112	464	0	PREDICTED: Sesamum indicum aldehyde dehydrogenase family 3 member F1 (LOC105171095), mRNA	K00128	ALDH	aldehyde dehydrogenase (NAD+)	http://www.genome.jp/dbget-bin/www_bget?ko:K00128	Q70E96	943	3.1e-100	Aldehyde dehydrogenase family 3 member F1 OS=Arabidopsis thaliana OX=3702 GN=ALDH3F1 PE=2 SV=2	PF00171	Aldehyde dehydrogenase family	GO:0055114	oxidation-reduction process	GO:0016491	oxidoreductase activity	--	--	KOG2456	Aldehyde dehydrogenase	FALSE	1.27	0.0208039	FALSE	0.644383	0.361408	UP	1.80673	0.000270522	UP	1.95142	9.47e-05	UP	2.54561	1.91e-07
Cluster-11149.20053	9.66	20.82	16.55	13.66	6.74	1859	1173820482	XP_020552161.1	1902	3.8e-210	probable N-acetyl-gamma-glutamyl-phosphate reductase, chloroplastic [Sesamum indicum]	XM_011090000.2	XM_011090000	865	0	PREDICTED: Sesamum indicum probable N-acetyl-gamma-glutamyl-phosphate reductase, chloroplastic (LOC105169577), transcript variant X1, mRNA	K00145	argC	N-acetyl-gamma-glutamyl-phosphate reductase	http://www.genome.jp/dbget-bin/www_bget?ko:K00145	Q93Z70	1462	1.5e-160	Probable N-acetyl-gamma-glutamyl-phosphate reductase, chloroplastic OS=Arabidopsis thaliana OX=3702 GN=At2g19940 PE=1 SV=2	PF02254//PF01370//PF01118//PF10501//PF01113//PF02774//PF03435	TrkA-N domain//NAD dependent epimerase/dehydratase family//Semialdehyde dehydrogenase, NAD binding domain//Ribosomal subunit 39S//Dihydrodipicolinate reductase, N-terminus//Semialdehyde dehydrogenase, dimerisation domain//Saccharopine dehydrogenase NADP binding domain	GO:0008652//GO:0006813//GO:0055114//GO:0009085//GO:0009089	cellular amino acid biosynthetic process//potassium ion transport//oxidation-reduction process//lysine biosynthetic process//lysine biosynthetic process via diaminopimelate	GO:0008839//GO:0003824//GO:0046983//GO:0051287//GO:0016491//GO:0050662//GO:0016620	4-hydroxy-tetrahydrodipicolinate reductase//catalytic activity//protein dimerization activity//NAD binding//oxidoreductase activity//obsolete coenzyme binding//oxidoreductase activity, acting on the aldehyde or oxo group of donors, NAD or NADP as acceptor	GO:0005739	mitochondrion	KOG4354	N-acetyl-gamma-glutamyl-phosphate reductase	FALSE	0.810361	0.201115	FALSE	0.622997	0.364744	FALSE	1.32256	0.00833073	FALSE	0.173733	0.996768	FALSE	0.746675	0.188141
Cluster-11149.27816	16.77	26.82	30.37	3.63	3.17	1972	1276245597	PIN05638.1	1812	1.1e-199	UDP-N-acetylglucosamine 4,6-dehydratase (inverting) [Handroanthus impetiginosus]	XR_847942.2	XR_847942	647	0	PREDICTED: Sesamum indicum uncharacterized LOC105163644 (LOC105163644), transcript variant X4, misc_RNA	-	-	-	http://www.genome.jp/dbget-bin/www_bget?ko:-	--	--	--	--	PF01118//PF01370//PF01073//PF03435//PF01113//PF00056//PF16045//PF00185	Semialdehyde dehydrogenase, NAD binding domain//NAD dependent epimerase/dehydratase family//3-beta hydroxysteroid dehydrogenase/isomerase family//Saccharopine dehydrogenase NADP binding domain//Dihydrodipicolinate reductase, N-terminus//lactate/malate dehydrogenase, NAD binding domain//LisH//Aspartate/ornithine carbamoyltransferase, Asp/Orn binding domain	GO:0008209//GO:0006520//GO:0055114//GO:0008207//GO:0009089//GO:0006694//GO:0008210//GO:0009085	androgen metabolic process//cellular amino acid metabolic process//oxidation-reduction process//C21-steroid hormone metabolic process//lysine biosynthetic process via diaminopimelate//steroid biosynthetic process//estrogen metabolic process//lysine biosynthetic process	GO:0005515//GO:0050662//GO:0016620//GO:0051287//GO:0016743//GO:0003824//GO:0008839//GO:0016616//GO:0016597//GO:0016491//GO:0003854	protein binding//obsolete coenzyme binding//oxidoreductase activity, acting on the aldehyde or oxo group of donors, NAD or NADP as acceptor//NAD binding//carboxyl- or carbamoyltransferase activity//catalytic activity//4-hydroxy-tetrahydrodipicolinate reductase//oxidoreductase activity, acting on the CH-OH group of donors, NAD or NADP as acceptor//amino acid binding//oxidoreductase activity//3-bet…	--	--	--	--	UP	3.08808	4.92e-10	FALSE	-0.203696	0.940531	UP	2.77349	1.19e-08	UP	2.88318	6.39e-09	UP	2.62931	8.44e-08
Cluster-11149.1433	0	0	0	0.52	9.25	497	1314674090	AUF72237.1	371	3.4e-33	aldehyde dehydrogenase 2F1 [Syntrichia caninervis]	XM_024849947.1	XM_024849947	69	2.42e-25	Aspergillus steynii IBT 23096 aldehyde dehydrogenase (P170DRAFT_439918), mRNA	K00128	ALDH	aldehyde dehydrogenase (NAD+)	http://www.genome.jp/dbget-bin/www_bget?ko:K00128	O74187	450	9e-44	Aldehyde dehydrogenase OS=Agaricus bisporus OX=5341 GN=aldA PE=3 SV=1	PF00171	Aldehyde dehydrogenase family	GO:0055114	oxidation-reduction process	GO:0016491	oxidoreductase activity	--	--	KOG2450	Aldehyde dehydrogenase	FALSE	-4.52318	0.566119	DOWN	-4.50321	1.14e-07	DOWN	-8.87314	1.31e-09	FALSE	-4.35711	0.806498	DOWN	-8.63287	9.22e-09
Cluster-11149.29757	3.54	15.95	8.93	16.48	18.86	3208	747051234	XP_011071705.1	1112	2.7e-118	malate dehydrogenase, chloroplastic-like [Sesamum indicum]	XM_011073403.2	XM_011073403	688	0	PREDICTED: Sesamum indicum malate dehydrogenase, chloroplastic-like (LOC105157102), mRNA	K00026	MDH2	malate dehydrogenase	http://www.genome.jp/dbget-bin/www_bget?ko:K00026	Q9SN86	825	1.9e-86	Malate dehydrogenase, chloroplastic OS=Arabidopsis thaliana OX=3702 GN=At3g47520 PE=1 SV=1	PF01073//PF01118//PF01370//PF00056//PF02866//PF01113	3-beta hydroxysteroid dehydrogenase/isomerase family//Semialdehyde dehydrogenase, NAD binding domain//NAD dependent epimerase/dehydratase family//lactate/malate dehydrogenase, NAD binding domain//lactate/malate dehydrogenase, alpha/beta C-terminal domain//Dihydrodipicolinate reductase, N-terminus	GO:0009085//GO:0008207//GO:0055114//GO:0008210//GO:0006694//GO:0009089//GO:0008209	lysine biosynthetic process//C21-steroid hormone metabolic process//oxidation-reduction process//estrogen metabolic process//steroid biosynthetic process//lysine biosynthetic process via diaminopimelate//androgen metabolic process	GO:0051287//GO:0016491//GO:0003854//GO:0003824//GO:0008839//GO:0016616//GO:0016620//GO:0050662	NAD binding//oxidoreductase activity//3-beta-hydroxy-delta5-steroid dehydrogenase activity//catalytic activity//4-hydroxy-tetrahydrodipicolinate reductase//oxidoreductase activity, acting on the CH-OH group of donors, NAD or NADP as acceptor//oxidoreductase activity, acting on the aldehyde or oxo group of donors, NAD or NADP as acceptor//obsolete coenzyme binding	--	--	KOG1494	NAD-dependent malate dehydrogenase	FALSE	0.152597	1	FALSE	-0.590339	0.380942	FALSE	-0.548511	0.348189	DOWN	-1.54243	0.0028377	DOWN	-2.18268	5.82e-06
Cluster-11149.27755	7.78	10.57	8	6.36	7.9	2942	1276261051	PIN17974.1	1196	4.4e-128	Alcohol dehydrogenase, class III [Handroanthus impetiginosus]	XM_011101358.2	XM_011101358	479	0	PREDICTED: Sesamum indicum alcohol dehydrogenase 1B (LOC105178021), mRNA	-	-	-	http://www.genome.jp/dbget-bin/www_bget?ko:-	A4YGN0	369	1.3e-33	Succinate-semialdehyde dehydrogenase (acetylating) OS=Metallosphaera sedula (strain ATCC 51363 / DSM 5348 / JCM 9185 / NBRC 15509 / TH2) OX=399549 GN=Msed_1424 PE=1 SV=1	PF08240	Alcohol dehydrogenase GroES-like domain	GO:0055114	oxidation-reduction process	--	--	--	--	KOG0023	Alcohol dehydrogenase, class V	FALSE	0.932597	0.119717	FALSE	-0.709263	0.276207	FALSE	0.112559	0.970334	FALSE	0.966742	0.0947931	FALSE	0.207487	0.84315
Cluster-11149.1432	0	0	0	0.34	8.95	1241	1344001231	XP_023882895.1	1297	3.6e-140	aldehyde dehydrogenase [Quercus suber]	KY320178.1	KY320178	434	0	Syntrichia caninervis aldehyde dehydrogenase 2B2 (Aldh2B2) mRNA, complete cds	K00128	ALDH	aldehyde dehydrogenase (NAD+)	http://www.genome.jp/dbget-bin/www_bget?ko:K00128	O74187	1430	5.2e-157	Aldehyde dehydrogenase OS=Agaricus bisporus OX=5341 GN=aldA PE=3 SV=1	PF00171//PF05893	Aldehyde dehydrogenase family//Acyl-CoA reductase (LuxC)	GO:0055114//GO:0008218//GO:0006118	oxidation-reduction process//bioluminescence//obsolete electron transport	GO:0003995//GO:0016491	acyl-CoA dehydrogenase activity//oxidoreductase activity	--	--	KOG2450	Aldehyde dehydrogenase	FALSE	-5.89846	0.101362	DOWN	-5.08629	5.61e-15	DOWN	-10.8294	2.99e-20	FALSE	-5.72746	0.093697	DOWN	-10.5887	8.16e-19
Cluster-11149.25517	53.98	94.33	87.87	70.2	80.48	2084	527207818	EPS72983.1	2437	3.9e-272	mitochondrial benzaldehyde dehydrogenase, partial [Genlisea aurea]	XM_011088248.2	XM_011088248	1083	0	PREDICTED: Sesamum indicum aldehyde dehydrogenase family 2 member B7, mitochondrial (LOC105168246), mRNA	K00128	ALDH	aldehyde dehydrogenase (NAD+)	http://www.genome.jp/dbget-bin/www_bget?ko:K00128	Q8S528	2264	1.7e-253	Aldehyde dehydrogenase family 2 member B7, mitochondrial OS=Arabidopsis thaliana OX=3702 GN=ALDH2B7 PE=1 SV=2	PF00171	Aldehyde dehydrogenase family	GO:0055114	oxidation-reduction process	GO:0016491	oxidoreductase activity	--	--	KOG2450	Aldehyde dehydrogenase	FALSE	0.627822	0.377068	FALSE	-0.593447	0.371491	FALSE	-0.0764071	1	FALSE	0.295552	0.806498	FALSE	-0.347898	0.619159
Cluster-4037.0	0	0	0	0.45	3.18	535	1492296206	RLN55932.1	342	8.5e-30	hypothetical protein BBJ28_00025940, partial [Nothophytophthora sp. Chile5]	--	--	--	--	--	K00128	ALDH	aldehyde dehydrogenase (NAD+)	http://www.genome.jp/dbget-bin/www_bget?ko:K00128	P42041	349	5e-32	Aldehyde dehydrogenase OS=Alternaria alternata OX=5599 GN=ALTA10 PE=1 SV=2	PF00171	Aldehyde dehydrogenase family	GO:0055114	oxidation-reduction process	GO:0016491	oxidoreductase activity	--	--	KOG2450	Aldehyde dehydrogenase	FALSE	-4.52318	0.566119	DOWN	-3.17202	0.00209143	DOWN	-7.54222	5.5e-05	FALSE	-4.35711	0.806498	DOWN	-7.30279	0.000200198
Cluster-11149.26528	20.46	35.6	28.75	31.97	17.04	3919	604300107	EYU19950.1	1326	5e-143	hypothetical protein MIMGU_mgv1a002084mg [Erythranthe guttata]	XM_011086708.2	XM_011086708	627	0	PREDICTED: Sesamum indicum delta-1-pyrroline-5-carboxylate synthase (LOC105167125), mRNA	K12657	ALDH18A1, P5CS	delta-1-pyrroline-5-carboxylate synthetase [EC:2.7.2.11 1.2.1.41]	http://www.genome.jp/dbget-bin/www_bget?ko:K12657	O04015	1245	4.7e-135	Delta-1-pyrroline-5-carboxylate synthase OS=Actinidia deliciosa OX=3627 PE=2 SV=1	PF00171	Aldehyde dehydrogenase family	GO:0055114	oxidation-reduction process	GO:0016491	oxidoreductase activity	--	--	KOG4165	Gamma-glutamyl phosphate reductase	FALSE	0.354789	0.744092	FALSE	0.511821	0.485866	FALSE	0.755828	0.159159	FALSE	0.0323689	1	FALSE	0.494176	0.427002
Cluster-5587.0	0	0	0	0.13	1.92	880	1344038363	XP_023906526.1	629	7.4e-63	TATA-box-binding protein, partial [Quercus suber]	XM_001796467.1	XM_001796467	253	2.29e-127	Parastagonospora nodorum SN15 hypothetical protein (SNOG_06135), partial mRNA	K03120	TBP, tbp	transcription initiation factor TFIID TATA-box-binding protein	http://www.genome.jp/dbget-bin/www_bget?ko:K03120	Q12731	629	2.8e-64	TATA-box-binding protein OS=Emericella nidulans (strain FGSC A4 / ATCC 38163 / CBS 112.46 / NRRL 194 / M139) OX=227321 GN=tbpA PE=2 SV=1	PF00352//PF02738	Transcription factor TFIID (or TATA-binding protein, TBP)//Molybdopterin-binding domain of aldehyde dehydrogenase	GO:0055114//GO:0006352	oxidation-reduction process//DNA-templated transcription, initiation	GO:0003677//GO:0016491	DNA binding//oxidoreductase activity	--	--	KOG3302	TATA-box binding protein (TBP), component of TFIID and TFIIIB	FALSE	-3.96925	0.835728	DOWN	-4.13768	3.52e-05	DOWN	-7.95532	4.15e-06	FALSE	-3.80692	0.806498	DOWN	-7.71555	1.95e-05
Cluster-11149.26640	20.54	48.44	46.6	64.86	40.08	1223	1131300047	APU54673.1	1183	5.9e-127	aldehyde dehydrogenase enzyme [Buddleja davidii]	XM_011071188.2	XM_011071188	394	0	PREDICTED: Sesamum indicum aldehyde dehydrogenase-like (LOC105155310), mRNA	K00128	ALDH	aldehyde dehydrogenase (NAD+)	http://www.genome.jp/dbget-bin/www_bget?ko:K00128	Q8VXQ2	1036	2.5e-111	Aldehyde dehydrogenase OS=Craterostigma plantagineum OX=4153 GN=ALDH PE=1 SV=1	PF00171	Aldehyde dehydrogenase family	GO:0055114	oxidation-reduction process	GO:0016491	oxidoreductase activity	--	--	KOG2456	Aldehyde dehydrogenase	FALSE	-0.215593	0.937811	FALSE	0.297138	0.794971	FALSE	-0.029225	1	FALSE	-0.986811	0.0861911	FALSE	-0.739653	0.178662
Cluster-11149.21690	1.35	2.18	1.52	2.66	1.61	4202	1276271215	PIN26643.1	525	4e-50	Alpha-aminoadipic semialdehyde dehydrogenase-phosphopantetheinyl transferase [Handroanthus impetiginosus]	XM_011085931.2	XM_011085931	170	1.56e-80	PREDICTED: Sesamum indicum L-aminoadipate-semialdehyde dehydrogenase-phosphopantetheinyl transferase-like (LOC105166543), mRNA	K06133	LYS5, acpT	4'-phosphopantetheinyl transferase	http://www.genome.jp/dbget-bin/www_bget?ko:K06133	Q49KT9	150	4.7e-08	Uncharacterized protein ycf68 OS=Eucalyptus globulus subsp. globulus OX=71271 GN=ycf68-1 PE=3 SV=1	PF01648	4'-phosphopantetheinyl transferase superfamily	GO:0015940	pantothenate biosynthetic process	GO:0008897//GO:0000287	holo-[acyl-carrier-protein] synthase activity//magnesium ion binding	--	--	--	--	FALSE	-0.0918313	1	FALSE	0.331469	0.779677	FALSE	0.128921	0.964099	FALSE	-0.309007	0.806498	FALSE	-0.0275205	1
Cluster-5179.0	0	0	0	0.17	1.95	1753	1343993546	XP_023878828.1	1420	2.8e-154	uncharacterized protein LOC111991281 [Quercus suber]	XM_024906626.1	XM_024906626	242	6.07e-121	Trichoderma asperellum CBS 433.97 hypothetical protein (M441DRAFT_46065), partial mRNA	K17761	SSADH	succinate-semialdehyde dehydrogenase, mitochondrial	http://www.genome.jp/dbget-bin/www_bget?ko:K17761	Q9US47	1245	2.1e-135	Putative succinate-semialdehyde dehydrogenase C1002.12c [NADP(+)] OS=Schizosaccharomyces pombe (strain 972 / ATCC 24843) OX=284812 GN=SPAC1002.12c PE=3 SV=2	PF00171//PF07941	Aldehyde dehydrogenase family//Potassium channel Kv1.4 tandem inactivation domain	GO:0006813//GO:0055114	potassium ion transport//oxidation-reduction process	GO:0030955//GO:0005249//GO:0016491	potassium ion binding//voltage-gated potassium channel activity//oxidoreductase activity	GO:0016021//GO:0008076	integral component of membrane//voltage-gated potassium channel complex	KOG2451	Aldehyde dehydrogenase	FALSE	-5.49146	0.158449	DOWN	-3.89537	1.91e-07	DOWN	-9.232	2.44e-11	FALSE	-5.32147	0.233253	DOWN	-8.99161	2.65e-10
Cluster-1124.0	0	0	0	0	4.26	349	1344000225	XP_023882340.1	368	5.3e-33	beta-apo-4'-carotenal oxygenase-like [Quercus suber]	XM_031135888.1	XM_031135888	76	2.12e-29	Phialemoniopsis curvata uncharacterized protein (E0L32_000178), partial mRNA	K00128	ALDH	aldehyde dehydrogenase (NAD+)	http://www.genome.jp/dbget-bin/www_bget?ko:K00128	F6IBC7	382	4.8e-36	Beta-apo-4'-carotenal oxygenase OS=Gibberella fujikuroi (strain CBS 195.34 / IMI 58289 / NRRL A-6831) OX=1279085 GN=carD PE=1 SV=2	PF00171	Aldehyde dehydrogenase family	GO:0055114	oxidation-reduction process	GO:0016491	oxidoreductase activity	--	--	KOG2456	Aldehyde dehydrogenase	FALSE	-5.13e-15	1	FALSE	-6.56514	0.0149166	FALSE	-6.48032	0.00923724	FALSE	0	1	FALSE	-6.24242	0.0245024
Cluster-11149.244	0	0	0	0.12	4.77	603	1344067249	XP_023917311.1	455	7.6e-43	protein fmp52, mitochondrial-like [Quercus suber]	--	--	--	--	--	-	-	-	http://www.genome.jp/dbget-bin/www_bget?ko:-	Q5BCH7	471	4e-46	Protein fmp52, mitochondrial OS=Emericella nidulans (strain FGSC A4 / ATCC 38163 / CBS 112.46 / NRRL 194 / M139) OX=227321 GN=fmp52 PE=3 SV=1	PF02308//PF01118//PF01370	MgtC family//Semialdehyde dehydrogenase, NAD binding domain//NAD dependent epimerase/dehydratase family	GO:0055114	oxidation-reduction process	GO:0016620//GO:0051287//GO:0003824//GO:0050662	oxidoreductase activity, acting on the aldehyde or oxo group of donors, NAD or NADP as acceptor//NAD binding//catalytic activity//obsolete coenzyme binding	GO:0016020	membrane	KOG4039	Serine/threonine kinase TIP30/CC3	FALSE	-3.05854	1	DOWN	-5.52083	9.57e-08	DOWN	-8.43173	8.33e-08	FALSE	-2.90649	1	DOWN	-8.19166	4.36e-07
Cluster-11149.44721	0.34	0.07	0.78	0.82	0.42	871	747083029	XP_011088866.1	1132	3.5e-121	fatty acyl-CoA reductase 3 [Sesamum indicum]	XM_011090564.2	XM_011090564	368	0	PREDICTED: Sesamum indicum fatty acyl-CoA reductase 3 (LOC105169997), mRNA	-	-	-	http://www.genome.jp/dbget-bin/www_bget?ko:-	Q93ZB9	962	6.8e-103	Fatty acyl-CoA reductase 3 OS=Arabidopsis thaliana OX=3702 GN=FAR3 PE=1 SV=1	PF00016//PF01370//PF01118//PF01073//PF03435	Ribulose bisphosphate carboxylase large chain, catalytic domain//NAD dependent epimerase/dehydratase family//Semialdehyde dehydrogenase, NAD binding domain//3-beta hydroxysteroid dehydrogenase/isomerase family//Saccharopine dehydrogenase NADP binding domain	GO:0006694//GO:0008210//GO:0008209//GO:0008207//GO:0055114	steroid biosynthetic process//estrogen metabolic process//androgen metabolic process//C21-steroid hormone metabolic process//oxidation-reduction process	GO:0016620//GO:0050662//GO:0000287//GO:0051287//GO:0016491//GO:0003854//GO:0003824//GO:0016616	oxidoreductase activity, acting on the aldehyde or oxo group of donors, NAD or NADP as acceptor//obsolete coenzyme binding//magnesium ion binding//NAD binding//oxidoreductase activity//3-beta-hydroxy-delta5-steroid dehydrogenase activity//catalytic activity//oxidoreductase activity, acting on the CH-OH group of donors, NAD or NADP as acceptor	--	--	KOG1221	Acyl-CoA reductase	FALSE	-3.18213	0.0690122	FALSE	0.567035	0.944538	FALSE	-2.69858	0.28735	FALSE	-0.574667	0.982025	FALSE	-0.0571065	1
Cluster-11149.1031	1.17	0.32	0.23	1.12	2.92	1192	1241380827	ASZ85176.1	1709	5.9e-188	elongation factor 1-alpha [Hylocereus polyrhizus]	BK006064.1	BK006064	711	0	TPA_inf: Pristionchus pacificus eukaryotic translation elongation factor 1A (eft-1) mRNA, complete cds	K03231	EEF1A	elongation factor 1-alpha	http://www.genome.jp/dbget-bin/www_bget?ko:K03231	Q2HJN9	1939	4.8e-216	Elongation factor 1-alpha 4 OS=Oscheius tipulae OX=141969 GN=eft-4 PE=3 SV=1	PF00009//PF04670//PF03144//PF01926//PF02774	Elongation factor Tu GTP binding domain//Gtr1/RagA G protein conserved region//Elongation factor Tu domain 2//50S ribosome-binding GTPase//Semialdehyde dehydrogenase, dimerisation domain	GO:0008652	cellular amino acid biosynthetic process	GO:0046983//GO:0016620//GO:0003924//GO:0005525	protein dimerization activity//oxidoreductase activity, acting on the aldehyde or oxo group of donors, NAD or NADP as acceptor//GTPase activity//GTP binding	--	--	KOG0052	Translation elongation factor EF-1 alpha/Tu	FALSE	-1.60558	0.167254	FALSE	-1.7734	0.00790153	DOWN	-3.48546	1.54e-06	FALSE	0.726836	0.536096	FALSE	-1.09546	0.109024
Cluster-11149.40331	14.73	5.65	2.38	9.43	3.89	1325	747098577	XP_011097307.1	977	4.9e-103	uncharacterized protein LOC105176264 [Sesamum indicum]	XM_011099005.2	XM_011099005	381	0	PREDICTED: Sesamum indicum ribosome-recycling factor (LOC105176264), mRNA	-	-	-	http://www.genome.jp/dbget-bin/www_bget?ko:-	Q5WFT1	333	8.9e-30	Ribosome-recycling factor OS=Bacillus clausii (strain KSM-K16) OX=66692 GN=frr PE=3 SV=1	PF15348//PF00171//PF03229	Gemini of Cajal bodies-associated protein 8//Aldehyde dehydrogenase family//Alphavirus glycoprotein J	GO:0019050//GO:0055114//GO:0000387	suppression by virus of host apoptotic process//oxidation-reduction process//spliceosomal snRNP assembly	GO:0016491	oxidoreductase activity	GO:0032797	SMN complex	KOG4759	Ribosome recycling factor	FALSE	-0.534089	0.544268	FALSE	0.881604	0.172923	FALSE	0.236834	0.823935	FALSE	1.31487	0.0155743	UP	2.14621	2e-05
Cluster-11149.26540	26.61	51.97	50.99	55.98	50.06	1814	1276246595	PIN06389.1	1731	2.5e-190	NAD-dependent malate dehydrogenase [Handroanthus impetiginosus]	XM_011101130.2	XM_011101130	852	0	PREDICTED: Sesamum indicum malate dehydrogenase, glyoxysomal (LOC105177859), mRNA	K00026	MDH2	malate dehydrogenase	http://www.genome.jp/dbget-bin/www_bget?ko:K00026	P19446	1592	1.2e-175	Malate dehydrogenase, glyoxysomal OS=Citrullus lanatus OX=3654 PE=1 SV=1	PF00056//PF01118//PF02866//PF01073	lactate/malate dehydrogenase, NAD binding domain//Semialdehyde dehydrogenase, NAD binding domain//lactate/malate dehydrogenase, alpha/beta C-terminal domain//3-beta hydroxysteroid dehydrogenase/isomerase family	GO:0008209//GO:0006694//GO:0008210//GO:0008207//GO:0055114	androgen metabolic process//steroid biosynthetic process//estrogen metabolic process//C21-steroid hormone metabolic process//oxidation-reduction process	GO:0016620//GO:0016616//GO:0003854//GO:0016491//GO:0051287	oxidoreductase activity, acting on the aldehyde or oxo group of donors, NAD or NADP as acceptor//oxidoreductase activity, acting on the CH-OH group of donors, NAD or NADP as acceptor//3-beta-hydroxy-delta5-steroid dehydrogenase activity//oxidoreductase activity//NAD binding	--	--	KOG1494	NAD-dependent malate dehydrogenase	FALSE	0.0951952	1	FALSE	-0.23546	0.859106	FALSE	-0.251041	0.742009	FALSE	-0.398867	0.672335	FALSE	-0.68432	0.21753
Cluster-4148.0	0	0	0	0	1.78	809	1559668379	RWW90456.1	721	1.5e-73	hypothetical protein BHE74_00001981 [Ensete ventricosum]	--	--	--	--	--	K17761	SSADH	succinate-semialdehyde dehydrogenase, mitochondrial	http://www.genome.jp/dbget-bin/www_bget?ko:K17761	Q88RC0	713	4.7e-74	Glutarate-semialdehyde dehydrogenase OS=Pseudomonas putida (strain ATCC 47054 / DSM 6125 / NCIMB 11950 / KT2440) OX=160488 GN=davD PE=3 SV=1	PF00440//PF15800//PF00171	Bacterial regulatory proteins, tetR family//Clock interacting protein circadian//Aldehyde dehydrogenase family	GO:0055114//GO:0045892//GO:0042754	oxidation-reduction process//negative regulation of transcription, DNA-templated//negative regulation of circadian rhythm	GO:0016491//GO:0003677	oxidoreductase activity//DNA binding	--	--	KOG2451	Aldehyde dehydrogenase	FALSE	-5.13e-15	1	DOWN	-7.75813	3.28e-05	DOWN	-7.67279	2.56e-05	FALSE	0	1	DOWN	-7.43324	8.96e-05
Cluster-11149.48447	0	0	0	0.11	4.17	1438	1343989325	XP_023876615.1	1655	1.3e-181	S-(hydroxymethyl)glutathione dehydrogenase-like [Quercus suber]	XM_006966157.1	XM_006966157	562	0	Trichoderma reesei QM6a formaldehyde dehydrogenase, glutathione dependent (TRIREDRAFT_22633), mRNA	K00121	frmA, ADH5, adhC	S-(hydroxymethyl)glutathione dehydrogenase / alcohol dehydrogenase [EC:1.1.1.284 1.1.1.1]	http://www.genome.jp/dbget-bin/www_bget?ko:K00121	P0CL53	1599	1.5e-176	S-(hydroxymethyl)glutathione dehydrogenase OS=Aspergillus oryzae (strain ATCC 42149 / RIB 40) OX=510516 GN=FDH1 PE=3 SV=1	PF08240//PF03435//PF03721//PF00219//PF00107//PF02254	Alcohol dehydrogenase GroES-like domain//Saccharopine dehydrogenase NADP binding domain//UDP-glucose/GDP-mannose dehydrogenase family, NAD binding domain//Insulin-like growth factor binding protein//Zinc-binding dehydrogenase//TrkA-N domain	GO:0055114//GO:0006813//GO:0001558	oxidation-reduction process//potassium ion transport//regulation of cell growth	GO:0016616//GO:0016491//GO:0051287//GO:0005520	oxidoreductase activity, acting on the CH-OH group of donors, NAD or NADP as acceptor//oxidoreductase activity//NAD binding//insulin-like growth factor binding	GO:0016942//GO:0005576	insulin-like growth factor binding protein complex//extracellular region	KOG0022	Alcohol dehydrogenase, class III	FALSE	-4.52318	0.566119	DOWN	-5.61934	5.01e-13	DOWN	-9.98918	2.91e-15	FALSE	-4.35711	0.806498	DOWN	-9.7486	4.84e-14
Cluster-11149.34561	1.41	1.25	0.91	2.22	0.38	2052	1343989273	XP_023876592.1	147	1.3e-06	aldehyde dehydrogenase 22A1 [Quercus suber]	XM_012991180.1	XM_012991180	120	4.7e-53	PREDICTED: Erythranthe guttatus aldehyde dehydrogenase 22A1 (LOC105966601), mRNA	-	-	-	http://www.genome.jp/dbget-bin/www_bget?ko:-	Q0WSF1	142	1.9e-07	Aldehyde dehydrogenase 22A1 OS=Arabidopsis thaliana OX=3702 GN=ALDH22A1 PE=2 SV=2	PF00171	Aldehyde dehydrogenase family	GO:0055114	oxidation-reduction process	GO:0016491	oxidoreductase activity	--	--	--	--	FALSE	-0.63238	0.49263	UP	2.13779	0.00112797	FALSE	1.39459	0.0537066	FALSE	0.0162938	1	UP	2.10229	0.00175148
Cluster-11149.29311	24.55	36.56	35.48	23.07	25.14	2082	747063588	XP_011078348.1	1524	2.9e-166	aldehyde dehydrogenase family 2 member C4 [Sesamum indicum]	XM_011080046.2	XM_011080046	591	0	PREDICTED: Sesamum indicum aldehyde dehydrogenase family 2 member C4 (LOC105162106), mRNA	K12355	REF1	coniferyl-aldehyde dehydrogenase	http://www.genome.jp/dbget-bin/www_bget?ko:K12355	Q56YU0	1251	5e-136	Aldehyde dehydrogenase family 2 member C4 OS=Arabidopsis thaliana OX=3702 GN=ALDH2C4 PE=1 SV=2	PF00815//PF00171	Histidinol dehydrogenase//Aldehyde dehydrogenase family	GO:0000105//GO:0055114	histidine biosynthetic process//oxidation-reduction process	GO:0004399//GO:0051287//GO:0016491//GO:0046872	histidinol dehydrogenase activity//NAD binding//oxidoreductase activity//metal ion binding	--	--	KOG2450	Aldehyde dehydrogenase	FALSE	0.865959	0.15638	FALSE	-0.520662	0.484756	FALSE	0.234516	0.773785	FALSE	0.764453	0.223478	FALSE	0.193788	0.847499
Cluster-11149.24117	13.08	22.84	29.67	104.94	19.02	754	848851246	XP_012835526.1	727	2.7e-74	PREDICTED: LOW QUALITY PROTEIN: uncharacterized protein LOC105956226 [Erythranthe guttata]	XM_012980072.1	XM_012980072	264	1.5e-133	PREDICTED: Erythranthe guttatus uncharacterized LOC105956226 (LOC105956226), mRNA	-	-	-	http://www.genome.jp/dbget-bin/www_bget?ko:-	--	--	--	--	PF02916//PF03435//PF01118//PF00056//PF01073//PF01370	DNA polymerase processivity factor//Saccharopine dehydrogenase NADP binding domain//Semialdehyde dehydrogenase, NAD binding domain//lactate/malate dehydrogenase, NAD binding domain//3-beta hydroxysteroid dehydrogenase/isomerase family//NAD dependent epimerase/dehydratase family	GO:0055114//GO:0008207//GO:0006694//GO:0008210//GO:0006260//GO:0008209	oxidation-reduction process//C21-steroid hormone metabolic process//steroid biosynthetic process//estrogen metabolic process//DNA replication//androgen metabolic process	GO:0051287//GO:0016491//GO:0003854//GO:0003824//GO:0016616//GO:0016620//GO:0050662	NAD binding//oxidoreductase activity//3-beta-hydroxy-delta5-steroid dehydrogenase activity//catalytic activity//oxidoreductase activity, acting on the CH-OH group of donors, NAD or NADP as acceptor//oxidoreductase activity, acting on the aldehyde or oxo group of donors, NAD or NADP as acceptor//obsolete coenzyme binding	--	--	--	--	DOWN	-1.99	7.18e-05	UP	2.06465	3.28e-05	FALSE	-0.0324984	1	DOWN	-2.33745	2.7e-06	FALSE	-0.322783	0.701706
Cluster-4375.0	0	0	0	0.08	4.26	767	1344000225	XP_023882340.1	497	1.3e-47	beta-apo-4'-carotenal oxygenase-like [Quercus suber]	--	--	--	--	--	-	-	-	http://www.genome.jp/dbget-bin/www_bget?ko:-	Q1K615	477	1e-46	Beta-apo-4'-carotenal oxygenase OS=Neurospora crassa (strain ATCC 24698 / 74-OR23-1A / CBS 708.71 / DSM 1257 / FGSC 987) OX=367110 GN=ylo-1 PE=1 SV=1	PF00171	Aldehyde dehydrogenase family	GO:0055114	oxidation-reduction process	GO:0016491	oxidoreductase activity	--	--	KOG2456	Aldehyde dehydrogenase	FALSE	-3.05854	1	DOWN	-5.90693	2.3e-09	DOWN	-8.81777	2.19e-09	FALSE	-2.90649	1	DOWN	-8.57752	1.61e-08
Cluster-11149.18156	16.25	28.92	23.21	34.74	46.7	2249	1276239727	PIN01487.1	1975	1.6e-218	Aldehyde dehydrogenase [Handroanthus impetiginosus]	XM_012972893.1	XM_012972893	898	0	PREDICTED: Erythranthe guttatus methylmalonate-semialdehyde dehydrogenase [acylating], mitochondrial (LOC105949591), mRNA	K00140	mmsA, iolA, ALDH6A1	malonate-semialdehyde dehydrogenase (acetylating) / methylmalonate-semialdehyde dehydrogenase [EC:1.2.1.18 1.2.1.27]	http://www.genome.jp/dbget-bin/www_bget?ko:K00140	Q0WM29	1712	1.9e-189	Methylmalonate-semialdehyde dehydrogenase [acylating], mitochondrial OS=Arabidopsis thaliana OX=3702 GN=ALDH6B2 PE=1 SV=2	PF00171	Aldehyde dehydrogenase family	GO:0055114	oxidation-reduction process	GO:0016491	oxidoreductase activity	--	--	KOG2449	Methylmalonate semialdehyde dehydrogenase	FALSE	-0.0630693	1	FALSE	-0.823119	0.163934	FALSE	-0.996958	0.0486438	FALSE	-0.421332	0.635231	FALSE	-1.29443	0.00898799
Cluster-3073.0	0	0	0	0	2.41	1000	326507416	BAK03101.1	1215	9.4e-131	predicted protein [Hordeum vulgare subsp. vulgare]	XM_016727474.1	XM_016727474	237	2.05e-118	Sporothrix schenckii 1099-18 NADH dehydrogenase (ubiquinone) 1 alpha subcomplex 9 (SPSK_00506), partial mRNA	K03953	NDUFA9	NADH dehydrogenase (ubiquinone) 1 alpha subcomplex subunit 9	http://www.genome.jp/dbget-bin/www_bget?ko:K03953	P25284	1224	3.2e-133	NADH-ubiquinone oxidoreductase 40 kDa subunit, mitochondrial OS=Neurospora crassa (strain ATCC 24698 / 74-OR23-1A / CBS 708.71 / DSM 1257 / FGSC 987) OX=367110 GN=nuo40 PE=1 SV=2	PF02738//PF01370//PF01073	Molybdopterin-binding domain of aldehyde dehydrogenase//NAD dependent epimerase/dehydratase family//3-beta hydroxysteroid dehydrogenase/isomerase family	GO:0006694//GO:0008210//GO:0008209//GO:0055114//GO:0008207	steroid biosynthetic process//estrogen metabolic process//androgen metabolic process//oxidation-reduction process//C21-steroid hormone metabolic process	GO:0050662//GO:0003854//GO:0016491//GO:0016616//GO:0003824	obsolete coenzyme binding//3-beta-hydroxy-delta5-steroid dehydrogenase activity//oxidoreductase activity//oxidoreductase activity, acting on the CH-OH group of donors, NAD or NADP as acceptor//catalytic activity	--	--	KOG2865	NADH:ubiquinone oxidoreductase, NDUFA9/39kDa subunit	FALSE	-5.13e-15	1	DOWN	-8.62387	3.08e-08	DOWN	-8.53834	3.43e-08	FALSE	0	1	DOWN	-8.29822	1.69e-07
Cluster-11149.47101	0	0	0	0	4.96	598	1072919053	XP_018470070.1	255	1.2e-19	PREDICTED: aldehyde dehydrogenase family 3 member I1, chloroplastic isoform X2 [Raphanus sativus]	--	--	--	--	--	K00128	ALDH	aldehyde dehydrogenase (NAD+)	http://www.genome.jp/dbget-bin/www_bget?ko:K00128	Q1K615	298	4.6e-26	Beta-apo-4'-carotenal oxygenase OS=Neurospora crassa (strain ATCC 24698 / 74-OR23-1A / CBS 708.71 / DSM 1257 / FGSC 987) OX=367110 GN=ylo-1 PE=1 SV=1	PF00171	Aldehyde dehydrogenase family	GO:0055114	oxidation-reduction process	GO:0016491	oxidoreductase activity	--	--	KOG2456	Aldehyde dehydrogenase	FALSE	-5.13e-15	1	DOWN	-8.55366	7.2e-08	DOWN	-8.46815	6.17e-08	FALSE	0	1	DOWN	-8.22806	3.16e-07
Cluster-11149.888	1.1	0.52	0.49	2.12	1.07	327	--	--	--	--	--	AB043540.1	AB043540	34	4.39e-06	Avicennia marina mRNA for betaine aldehyde dehydrogenase, complete cds	--	--	--	--	--	--	--	--	--	--	--	--	--	--	--	--	--	--	FALSE	-1.62924	0.744832	FALSE	0.551111	1	FALSE	-1.16611	1	FALSE	-0.30747	1	FALSE	0.192611	1
Cluster-11149.28698	26.08	57.52	87.32	18.57	27.85	1163	1276246359	PIN06215.1	1438	1.5e-156	hypothetical protein CDL12_21236 [Handroanthus impetiginosus]	XM_011085364.2	XM_011085364	464	0	PREDICTED: Sesamum indicum isoflavone reductase-like protein (LOC105166127), mRNA	-	-	-	http://www.genome.jp/dbget-bin/www_bget?ko:-	E1U332	1374	1.5e-150	Isoflavone reductase-like protein OS=Olea europaea OX=4146 PE=1 SV=1	PF02254//PF01118//PF01370//PF01073//PF03435	TrkA-N domain//Semialdehyde dehydrogenase, NAD binding domain//NAD dependent epimerase/dehydratase family//3-beta hydroxysteroid dehydrogenase/isomerase family//Saccharopine dehydrogenase NADP binding domain	GO:0006813//GO:0008207//GO:0055114//GO:0008209//GO:0008210//GO:0006694	potassium ion transport//C21-steroid hormone metabolic process//oxidation-reduction process//androgen metabolic process//estrogen metabolic process//steroid biosynthetic process	GO:0003824//GO:0016616//GO:0051287//GO:0003854//GO:0016491//GO:0050662//GO:0016620	catalytic activity//oxidoreductase activity, acting on the CH-OH group of donors, NAD or NADP as acceptor//NAD binding//3-beta-hydroxy-delta5-steroid dehydrogenase activity//oxidoreductase activity//obsolete coenzyme binding//oxidoreductase activity, acting on the aldehyde or oxo group of donors, NAD or NADP as acceptor	--	--	--	--	UP	1.83648	0.000245578	FALSE	-0.981507	0.089629	FALSE	0.744173	0.168672	FALSE	1.1608	0.0361243	FALSE	0.129312	0.958451
Cluster-3101.0	0	0	0	0	1.39	499	1344067949	XP_023917682.1	338	2.3e-29	uncharacterized protein LOC112029224 [Quercus suber]	XM_018841339.1	XM_018841339	41	8.92e-10	Fonsecaea erecta hypothetical protein (AYL99_09833), partial mRNA	K00130	betB, gbsA	betaine-aldehyde dehydrogenase	http://www.genome.jp/dbget-bin/www_bget?ko:K00130	A7FKL5	278	8e-24	NAD/NADP-dependent betaine aldehyde dehydrogenase OS=Yersinia pseudotuberculosis serotype O:1b (strain IP 31758) OX=349747 GN=betB PE=3 SV=1	PF00171	Aldehyde dehydrogenase family	GO:0055114	oxidation-reduction process	GO:0016491	oxidoreductase activity	--	--	KOG2450	Aldehyde dehydrogenase	FALSE	-5.13e-15	1	FALSE	-6.24701	0.036604	FALSE	-6.16242	0.0233754	FALSE	0	1	FALSE	-5.92525	0.0393902
Cluster-11149.100	0	0	0	0	0.68	439	1314674100	AUF72242.1	590	1.2e-58	aldehyde dehydrogenase 25A1 [Syntrichia caninervis]	--	--	--	--	--	K00130	betB, gbsA	betaine-aldehyde dehydrogenase	http://www.genome.jp/dbget-bin/www_bget?ko:K00130	P33008	326	1.9e-29	Probable aldehyde dehydrogenase OS=Pseudomonas sp. OX=306 GN=terPE PE=3 SV=1	PF00171	Aldehyde dehydrogenase family	GO:0055114	oxidation-reduction process	GO:0016491	oxidoreductase activity	--	--	KOG2450	Aldehyde dehydrogenase	FALSE	-5.13e-15	1	FALSE	-4.86329	0.540202	FALSE	-4.78057	0.441562	FALSE	0	1	FALSE	-4.54925	0.44892
Cluster-5189.0	0	0	0	0.27	1.8	561	--	--	--	--	--	--	--	--	--	--	--	--	--	--	--	--	--	--	PF00171	Aldehyde dehydrogenase family	GO:0055114	oxidation-reduction process	GO:0016491	oxidoreductase activity	--	--	--	--	FALSE	-3.96925	0.835728	FALSE	-3.03707	0.0137772	DOWN	-6.8551	0.00238337	FALSE	-3.80692	0.806498	FALSE	-6.61653	0.00625347
Cluster-11149.34822	4.34	7.5	14.13	45.38	22.57	673	747047127	XP_011069490.1	643	1.3e-64	aldehyde dehydrogenase-like [Sesamum indicum]	XM_011071188.2	XM_011071188	259	8e-131	PREDICTED: Sesamum indicum aldehyde dehydrogenase-like (LOC105155310), mRNA	K00128	ALDH	aldehyde dehydrogenase (NAD+)	http://www.genome.jp/dbget-bin/www_bget?ko:K00128	Q8VXQ2	560	2.1e-56	Aldehyde dehydrogenase OS=Craterostigma plantagineum OX=4153 GN=ALDH PE=1 SV=1	PF00171	Aldehyde dehydrogenase family	GO:0055114	oxidation-reduction process	GO:0016491	oxidoreductase activity	--	--	KOG2456	Aldehyde dehydrogenase	DOWN	-2.3796	4.86e-06	FALSE	0.608147	0.380714	DOWN	-1.88184	0.000286038	DOWN	-2.71801	3.48e-07	DOWN	-2.15935	5.59e-05
Cluster-11149.31350	4.56	16.04	15.61	34.75	19.83	779	1025219692	XP_016481806.1	455	9.8e-43	PREDICTED: aldehyde dehydrogenase family 3 member H1-like [Nicotiana tabacum]	--	--	--	--	--	K00128	ALDH	aldehyde dehydrogenase (NAD+)	http://www.genome.jp/dbget-bin/www_bget?ko:K00128	Q8VXQ2	392	7.5e-37	Aldehyde dehydrogenase OS=Craterostigma plantagineum OX=4153 GN=ALDH PE=1 SV=1	PF00171	Aldehyde dehydrogenase family	GO:0055114	oxidation-reduction process	GO:0016491	oxidoreductase activity	--	--	KOG2456	Aldehyde dehydrogenase	FALSE	-0.902445	0.154131	FALSE	0.409978	0.649299	FALSE	-0.60314	0.320851	DOWN	-2.25953	2.06e-05	DOWN	-1.89917	0.000343338
Cluster-11149.31351	2.34	6.14	10.56	11.73	5.83	1389	1131300047	APU54673.1	439	1.3e-40	aldehyde dehydrogenase enzyme [Buddleja davidii]	XM_023005689.1	XM_023005689	74	1.18e-27	PREDICTED: Olea europaea var. sylvestris aldehyde dehydrogenase-like (LOC111381845), mRNA	K00128	ALDH	aldehyde dehydrogenase (NAD+)	http://www.genome.jp/dbget-bin/www_bget?ko:K00128	Q8VXQ2	376	9.6e-35	Aldehyde dehydrogenase OS=Craterostigma plantagineum OX=4153 GN=ALDH PE=1 SV=1	PF01874//PF00171	ATP:dephospho-CoA triphosphoribosyl transferase//Aldehyde dehydrogenase family	GO:0016310//GO:0055114	phosphorylation//oxidation-reduction process	GO:0046917//GO:0005524//GO:0016491	triphosphoribosyl-dephospho-CoA synthase activity//ATP binding//oxidoreductase activity	--	--	KOG2456	Aldehyde dehydrogenase	FALSE	-0.728402	0.29365	FALSE	0.612056	0.399055	FALSE	-0.227013	0.830691	DOWN	-1.64924	0.00310408	FALSE	-1.08694	0.0633244
Cluster-11149.20074	14.05	22.38	16.1	18.16	17.56	1649	1276237222	PIM99887.1	839	6.2e-87	hypothetical protein CDL12_27616 [Handroanthus impetiginosus]	XM_011087950.2	XM_011087950	365	0	PREDICTED: Sesamum indicum OBERON-like protein (LOC105168037), mRNA	-	-	-	http://www.genome.jp/dbget-bin/www_bget?ko:-	Q84N38	777	3.6e-81	OBERON-like protein OS=Nicotiana benthamiana OX=4100 GN=PVIP PE=1 SV=1	PF02905//PF02738//PF15854	Epstein Barr virus nuclear antigen-1, DNA-binding domain//Molybdopterin-binding domain of aldehyde dehydrogenase//G-protein coupled receptor ligand 15	GO:0045893//GO:0055114//GO:0007165//GO:0006275	positive regulation of transcription, DNA-templated//oxidation-reduction process//signal transduction//regulation of DNA replication	GO:0016491//GO:0003677//GO:0001664	oxidoreductase activity//DNA binding//G protein-coupled receptor binding	GO:0042025	host cell nucleus	--	--	FALSE	0.50392	0.54789	FALSE	-0.348302	0.715086	FALSE	0.044848	1	FALSE	0.303452	0.806498	FALSE	-0.0948395	1
Cluster-11149.24949	38.61	54.72	43.76	103.43	81.97	2344	747079892	XP_011087175.1	1231	3.1e-132	betaine aldehyde dehydrogenase 1, chloroplastic [Sesamum indicum]	XM_012991371.1	XM_012991371	512	0	PREDICTED: Erythranthe guttatus betaine aldehyde dehydrogenase 1, chloroplastic-like (LOC105966789), mRNA	K00130	betB, gbsA	betaine-aldehyde dehydrogenase	http://www.genome.jp/dbget-bin/www_bget?ko:K00130	Q9S795	1105	4.8e-119	Betaine aldehyde dehydrogenase 1, chloroplastic OS=Arabidopsis thaliana OX=3702 GN=ALDH10A8 PE=2 SV=1	PF00730//PF00171	HhH-GPD superfamily base excision DNA repair protein//Aldehyde dehydrogenase family	GO:0055114//GO:0006284	oxidation-reduction process//base-excision repair	GO:0016491	oxidoreductase activity	--	--	KOG2450	Aldehyde dehydrogenase	FALSE	-0.717293	0.266887	FALSE	-0.0608366	1	FALSE	-0.888905	0.0864205	FALSE	-0.746552	0.233253	FALSE	-0.857389	0.103635
Cluster-11149.15437	23.34	37.92	47.6	108.81	77.13	596	1046589281	ANW06222.1	678	1e-68	1-deoxy-D-xylulose 5-phosphate reductoisomerase [Rehmannia glutinosa]	KX058461.1	KX058461	397	0	Rehmannia glutinosa 1-deoxy-D-xylulose 5-phosphate reductoisomerase (DXR) mRNA, complete cds	K00099	dxr	1-deoxy-D-xylulose-5-phosphate reductoisomerase	http://www.genome.jp/dbget-bin/www_bget?ko:K00099	Q9XES0	551	2.1e-55	1-deoxy-D-xylulose 5-phosphate reductoisomerase, chloroplastic OS=Mentha piperita OX=34256 GN=DXR PE=2 SV=2	PF02670//PF01118	1-deoxy-D-xylulose 5-phosphate reductoisomerase//Semialdehyde dehydrogenase, NAD binding domain	GO:0055114	oxidation-reduction process	GO:0016620//GO:0051287//GO:0070402	oxidoreductase activity, acting on the aldehyde or oxo group of donors, NAD or NADP as acceptor//NAD binding//NADPH binding	--	--	--	--	FALSE	-1.29974	0.0167985	FALSE	0.0966629	1	FALSE	-1.31377	0.00899349	DOWN	-1.55843	0.00278604	DOWN	-1.51167	0.00256281
Cluster-2505.0	0	0	0	0	1.45	518	1344070049	XP_023918779.1	404	5.3e-37	aldehyde dehydrogenase-like [Quercus suber]	--	--	--	--	--	K00128	ALDH	aldehyde dehydrogenase (NAD+)	http://www.genome.jp/dbget-bin/www_bget?ko:K00128	P08157	360	2.6e-33	Aldehyde dehydrogenase OS=Emericella nidulans (strain FGSC A4 / ATCC 38163 / CBS 112.46 / NRRL 194 / M139) OX=227321 GN=aldA PE=3 SV=2	PF00171	Aldehyde dehydrogenase family	GO:0055114	oxidation-reduction process	GO:0016491	oxidoreductase activity	--	--	KOG2450	Aldehyde dehydrogenase	FALSE	-5.13e-15	1	FALSE	-6.41483	0.0234343	FALSE	-6.33011	0.0146451	FALSE	0	1	FALSE	-6.09253	0.0245024
Cluster-11149.7788	1.5	2.63	1.11	1.59	2.36	2312	747062254	XP_011077626.1	1991	2.3e-220	delta-1-pyrroline-5-carboxylate synthase [Sesamum indicum]	XM_011079324.2	XM_011079324	875	0	PREDICTED: Sesamum indicum delta-1-pyrroline-5-carboxylate synthase (LOC105161590), mRNA	K12657	ALDH18A1, P5CS	delta-1-pyrroline-5-carboxylate synthetase [EC:2.7.2.11 1.2.1.41]	http://www.genome.jp/dbget-bin/www_bget?ko:K12657	O04015	1693	3.1e-187	Delta-1-pyrroline-5-carboxylate synthase OS=Actinidia deliciosa OX=3627 PE=2 SV=1	PF08650//PF00171	DASH complex subunit Dad4//Aldehyde dehydrogenase family	GO:0055114//GO:0008608	oxidation-reduction process//attachment of spindle microtubules to kinetochore	GO:0016491	oxidoreductase activity	GO:0072686//GO:0042729	mitotic spindle//DASH complex	KOG4165	Gamma-glutamyl phosphate reductase	FALSE	0.919833	0.192915	FALSE	-0.95814	0.15202	FALSE	-0.149029	0.943042	FALSE	0.582762	0.522544	FALSE	-0.425141	0.595162
Cluster-11149.24440	506.69	705.59	477.28	771.85	450.04	2525	1445371583	RDX67972.1	1447	3e-157	Elongation factor 1-alpha, partial [Mucuna pruriens]	XM_011093152.2	XM_011093152	711	0	PREDICTED: Sesamum indicum elongation factor 1-alpha-like (LOC105171896), mRNA	K03231	EEF1A	elongation factor 1-alpha	http://www.genome.jp/dbget-bin/www_bget?ko:K03231	O64937	1426	3.1e-156	Elongation factor 1-alpha OS=Oryza sativa subsp. japonica OX=39947 GN=REFA1 PE=2 SV=2	PF00009//PF02774//PF14987//PF01926//PF03144	Elongation factor Tu GTP binding domain//Semialdehyde dehydrogenase, dimerisation domain//NADH dehydrogenase 1 alpha subcomplex subunit 3//50S ribosome-binding GTPase//Elongation factor Tu domain 2	GO:0008652	cellular amino acid biosynthetic process	GO:0016620//GO:0003924//GO:0046983//GO:0005525	oxidoreductase activity, acting on the aldehyde or oxo group of donors, NAD or NADP as acceptor//GTPase activity//protein dimerization activity//GTP binding	GO:0005743//GO:0005747	mitochondrial inner membrane//mitochondrial respiratory chain complex I	KOG0052	Translation elongation factor EF-1 alpha/Tu	FALSE	0.071425	1	FALSE	0.382116	0.660344	FALSE	0.342758	0.608924	FALSE	0.0681277	1	FALSE	0.400235	0.535875
Cluster-11149.24685	7.71	12.49	8.59	14.52	10.24	4008	747105010	XP_011100766.1	2503	1.7e-279	aldehyde dehydrogenase 22A1 [Sesamum indicum]	XM_011102464.2	XM_011102464	1163	0	PREDICTED: Sesamum indicum aldehyde dehydrogenase 22A1 (LOC105178891), mRNA	-	-	-	http://www.genome.jp/dbget-bin/www_bget?ko:-	Q0WSF1	2255	3.6e-252	Aldehyde dehydrogenase 22A1 OS=Arabidopsis thaliana OX=3702 GN=ALDH22A1 PE=2 SV=2	PF05496//PF00171	Holliday junction DNA helicase RuvB P-loop domain//Aldehyde dehydrogenase family	GO:0055114//GO:0006281//GO:0006310	oxidation-reduction process//DNA repair//DNA recombination	GO:0016491//GO:0009378	oxidoreductase activity//four-way junction helicase activity	GO:0009379//GO:0005657	Holliday junction helicase complex//replication fork	KOG2450	Aldehyde dehydrogenase	FALSE	-0.0179464	1	FALSE	0.107802	1	FALSE	-0.0209151	1	FALSE	-0.236368	0.877635	FALSE	-0.178565	0.877336
Cluster-11149.49154	0	0	0	0.32	1.53	645	--	--	--	--	--	--	--	--	--	--	--	--	--	--	--	--	--	--	PF09290	Prokaryotic acetaldehyde dehydrogenase, dimerisation	GO:0055114//GO:0019439//GO:0006090	oxidation-reduction process//aromatic compound catabolic process//pyruvate metabolic process	GO:0008774	acetaldehyde dehydrogenase (acetylating) activity	--	--	--	--	FALSE	-4.52318	0.566119	FALSE	-2.5907	0.0286906	DOWN	-6.96112	0.00152724	FALSE	-4.35711	0.806498	DOWN	-6.72239	0.00398727
Cluster-11149.28004	9.01	22.72	25.02	47.74	15.91	315	747047127	XP_011069490.1	389	1.8e-35	aldehyde dehydrogenase-like [Sesamum indicum]	XM_011071188.2	XM_011071188	173	2.26e-83	PREDICTED: Sesamum indicum aldehyde dehydrogenase-like (LOC105155310), mRNA	K00128	ALDH	aldehyde dehydrogenase (NAD+)	http://www.genome.jp/dbget-bin/www_bget?ko:K00128	Q8VXQ2	338	5.5e-31	Aldehyde dehydrogenase OS=Craterostigma plantagineum OX=4153 GN=ALDH PE=1 SV=1	PF00171	Aldehyde dehydrogenase family	GO:0055114	oxidation-reduction process	GO:0016491	oxidoreductase activity	--	--	KOG2456	Aldehyde dehydrogenase	FALSE	-0.76262	0.386084	FALSE	1.17639	0.104217	FALSE	0.303362	0.818695	FALSE	-1.78609	0.0161043	FALSE	-0.658988	0.545768
Cluster-4096.0	0	0	0	0.47	4.3	430	1343993546	XP_023878828.1	432	2.5e-40	uncharacterized protein LOC111991281 [Quercus suber]	--	--	--	--	--	K17761	SSADH	succinate-semialdehyde dehydrogenase, mitochondrial	http://www.genome.jp/dbget-bin/www_bget?ko:K17761	P51649	436	3.3e-42	Succinate-semialdehyde dehydrogenase, mitochondrial OS=Homo sapiens OX=9606 GN=ALDH5A1 PE=1 SV=2	PF00171	Aldehyde dehydrogenase family	GO:0055114	oxidation-reduction process	GO:0016491	oxidoreductase activity	--	--	KOG2451	Aldehyde dehydrogenase	FALSE	-3.96925	0.835728	DOWN	-3.50329	0.00213389	DOWN	-7.32111	0.000277514	FALSE	-3.80692	0.806498	DOWN	-7.08192	0.000695485
Cluster-11149.19037	30.04	48.58	37.66	60.52	72.04	1991	747052921	XP_011072596.1	2416	1e-269	aldehyde dehydrogenase family 7 member B4 isoform X1 [Sesamum indicum]	XM_011074294.2	XM_011074294	1170	0	PREDICTED: Sesamum indicum aldehyde dehydrogenase family 7 member B4 (LOC105157813), transcript variant X1, mRNA	K14085	ALDH7A1	aldehyde dehydrogenase family 7 member A1 [EC:1.2.1.31 1.2.1.8 1.2.1.3]	http://www.genome.jp/dbget-bin/www_bget?ko:K14085	Q9SYG7	2074	1.8e-231	Aldehyde dehydrogenase family 7 member B4 OS=Arabidopsis thaliana OX=3702 GN=ALDH7B4 PE=2 SV=3	PF00171//PF07309	Aldehyde dehydrogenase family//Flagellar protein FlaF	GO:0044781//GO:0055114	bacterial-type flagellum organization//oxidation-reduction process	GO:0016491	oxidoreductase activity	--	--	KOG2453	Aldehyde dehydrogenase	FALSE	-0.114984	1	FALSE	-0.647836	0.330568	FALSE	-0.873594	0.0937246	FALSE	-0.335786	0.773293	FALSE	-1.03361	0.040878
Cluster-3656.0	0	0	0	0.09	1.82	701	1344001231	XP_023882895.1	472	9.4e-45	aldehyde dehydrogenase [Quercus suber]	--	--	--	--	--	K00128	ALDH	aldehyde dehydrogenase (NAD+)	http://www.genome.jp/dbget-bin/www_bget?ko:K00128	P40108	470	6.1e-46	Aldehyde dehydrogenase OS=Davidiella tassiana OX=29918 GN=CLAH10 PE=1 SV=2	PF00171	Aldehyde dehydrogenase family	GO:0055114	oxidation-reduction process	GO:0016491	oxidoreductase activity	--	--	KOG2450	Aldehyde dehydrogenase	FALSE	-3.05854	1	DOWN	-4.4875	0.00150439	DOWN	-7.39864	0.000184311	FALSE	-2.90649	1	DOWN	-7.15937	0.000455599
Cluster-11149.44846	0.16	0.62	0.28	0.49	1.06	1025	1600680066	TEY62143.1	160	2.1e-08	2-oxoglutarate dehydrogenase E1 component [Salvia splendens]	CP025662.1	CP025662	55	3.14e-17	Ipomoea triloba cultivar NCNSP0323 chromosome 3	K00164	OGDH, sucA	2-oxoglutarate dehydrogenase E1 component	http://www.genome.jp/dbget-bin/www_bget?ko:K00164	--	--	--	--	PF01118	Semialdehyde dehydrogenase, NAD binding domain	GO:0055114	oxidation-reduction process	GO:0016620//GO:0051287	oxidoreductase activity, acting on the aldehyde or oxo group of donors, NAD or NADP as acceptor//NAD binding	--	--	--	--	FALSE	0.546538	0.90417	FALSE	-1.48795	0.128893	FALSE	-1.05077	0.29498	FALSE	-0.884647	0.892507	FALSE	-2.41366	0.0245024
Cluster-11149.28404	7.14	10.21	7.1	12.33	13.63	4414	747067154	XP_011080282.1	6053	0	xanthine dehydrogenase 1 [Sesamum indicum]	XM_011081980.2	XM_011081980	2600	0	PREDICTED: Sesamum indicum xanthine dehydrogenase 1 (LOC105163571), mRNA	K00106	XDH	xanthine dehydrogenase/oxidase [EC:1.17.1.4 1.17.3.2]	http://www.genome.jp/dbget-bin/www_bget?ko:K00106	Q8GUQ8	5036	0	Xanthine dehydrogenase 1 OS=Arabidopsis thaliana OX=3702 GN=XDH1 PE=1 SV=1	PF01799//PF00111//PF02738//PF00941	[2Fe-2S] binding domain//2Fe-2S iron-sulfur cluster binding domain//Molybdopterin-binding domain of aldehyde dehydrogenase//FAD binding domain in molybdopterin dehydrogenase	GO:0006118//GO:0055114	obsolete electron transport//oxidation-reduction process	GO:0009055//GO:0051536//GO:0016491//GO:0046872	electron transfer activity//iron-sulfur cluster binding//oxidoreductase activity//metal ion binding	--	--	KOG0430	Xanthine dehydrogenase	FALSE	-0.0731789	1	FALSE	-0.540528	0.44978	FALSE	-0.724471	0.180375	FALSE	-0.110703	1	FALSE	-0.701216	0.204599
Cluster-11149.1033	0	0	0	0.09	5.71	749	1199285721	ARU79068.1	937	1.2e-98	elongation factor 1-alpha [Hibiscus cannabinus]	BK006064.1	BK006064	335	5.06e-173	TPA_inf: Pristionchus pacificus eukaryotic translation elongation factor 1A (eft-1) mRNA, complete cds	K03231	EEF1A	elongation factor 1-alpha	http://www.genome.jp/dbget-bin/www_bget?ko:K03231	P27592	992	1.9e-106	Elongation factor 1-alpha OS=Onchocerca volvulus OX=6282 PE=2 SV=1	PF03144//PF02774	Elongation factor Tu domain 2//Semialdehyde dehydrogenase, dimerisation domain	GO:0008652	cellular amino acid biosynthetic process	GO:0016620//GO:0046983//GO:0005525	oxidoreductase activity, acting on the aldehyde or oxo group of donors, NAD or NADP as acceptor//protein dimerization activity//GTP binding	--	--	KOG0052	Translation elongation factor EF-1 alpha/Tu	FALSE	-3.05854	1	DOWN	-6.27821	5.12e-11	DOWN	-9.18901	3.77e-11	FALSE	-2.90649	1	DOWN	-8.94863	4.27e-10
Cluster-11149.19139	8.54	18.42	23.12	34.22	19.6	972	1131300047	APU54673.1	453	2.1e-42	aldehyde dehydrogenase enzyme [Buddleja davidii]	KJ076944.1	KJ076944	46	2.99e-12	Sesamum indicum clone TilSSR_48145 microsatellite Sesame_48145 sequence	K00128	ALDH	aldehyde dehydrogenase (NAD+)	http://www.genome.jp/dbget-bin/www_bget?ko:K00128	Q70DU8	399	1.4e-37	Aldehyde dehydrogenase family 3 member H1 OS=Arabidopsis thaliana OX=3702 GN=ALDH3H1 PE=1 SV=2	PF00171//PF02637	Aldehyde dehydrogenase family//GatB domain	GO:0055114	oxidation-reduction process	GO:0016491//GO:0016884	oxidoreductase activity//carbon-nitrogen ligase activity, with glutamine as amido-N-donor	--	--	KOG2456	Aldehyde dehydrogenase	FALSE	-0.684994	0.323953	FALSE	0.405589	0.640228	FALSE	-0.390124	0.573594	FALSE	-1.33298	0.0150268	FALSE	-0.977289	0.0715658
Cluster-11149.31690	11.13	19.54	14.83	39.53	44.04	2714	1394862515	PWZ07113.1	1793	2.4e-197	Aldehyde dehydrogenase family 2 member B7, mitochondrial [Zea mays]	XM_028265405.1	XM_028265405	383	0	PREDICTED: Camellia sinensis aldehyde dehydrogenase family 2 member B4, mitochondrial-like (LOC114318501), mRNA	K00128	ALDH	aldehyde dehydrogenase (NAD+)	http://www.genome.jp/dbget-bin/www_bget?ko:K00128	Q9SU63	1496	2.5e-164	Aldehyde dehydrogenase family 2 member B4, mitochondrial OS=Arabidopsis thaliana OX=3702 GN=ALDH2B4 PE=1 SV=1	PF00171	Aldehyde dehydrogenase family	GO:0055114	oxidation-reduction process	GO:0016491	oxidoreductase activity	--	--	KOG2450	Aldehyde dehydrogenase	FALSE	-0.815798	0.187665	FALSE	-0.552045	0.431022	DOWN	-1.4786	0.00215649	FALSE	-1.15321	0.0336924	DOWN	-1.75523	0.000252574
Cluster-6540.0	0	0	0	0.35	2.82	371	1314674090	AUF72237.1	483	2.6e-46	aldehyde dehydrogenase 2F1 [Syntrichia caninervis]	XM_003053685.1	XM_003053685	262	9.09e-133	Nectria haematococca mpVI 77-13-4 predicted protein, mRNA	K00128	ALDH	aldehyde dehydrogenase (NAD+)	http://www.genome.jp/dbget-bin/www_bget?ko:K00128	P40108	479	2.9e-47	Aldehyde dehydrogenase OS=Davidiella tassiana OX=29918 GN=CLAH10 PE=1 SV=2	PF00171	Aldehyde dehydrogenase family	GO:0055114	oxidation-reduction process	GO:0016491	oxidoreductase activity	--	--	KOG2450	Aldehyde dehydrogenase	FALSE	-3.05854	1	FALSE	-3.25061	0.13038	FALSE	-6.16242	0.0233754	FALSE	-2.90649	1	FALSE	-5.92525	0.0393902
Cluster-11149.19888	11.25	11.79	7.63	0.02	0.54	2737	747067164	XP_011080288.1	665	1.5e-66	aldehyde dehydrogenase family 3 member F1-like [Sesamum indicum]	XM_023017864.1	XM_023017864	175	1.68e-83	PREDICTED: Olea europaea var. sylvestris aldehyde dehydrogenase family 3 member F1-like (LOC111392504), mRNA	K00128	ALDH	aldehyde dehydrogenase (NAD+)	http://www.genome.jp/dbget-bin/www_bget?ko:K00128	Q70E96	461	2.6e-44	Aldehyde dehydrogenase family 3 member F1 OS=Arabidopsis thaliana OX=3702 GN=ALDH3F1 PE=2 SV=2	PF00171	Aldehyde dehydrogenase family	GO:0055114	oxidation-reduction process	GO:0016491	oxidoreductase activity	--	--	KOG2456	Aldehyde dehydrogenase	UP	9.45906	4.38e-31	DOWN	-5.19064	1.47e-06	UP	4.14869	1.07e-14	UP	9.84369	1.98e-32	UP	4.61518	1.68e-17
Cluster-11149.8628	1.31	3.48	3.4	2.83	2.73	2095	747090892	XP_011093156.1	832	5.1e-86	methionine adenosyltransferase 2 subunit beta [Sesamum indicum]	XM_011094854.2	XM_011094854	366	0	PREDICTED: Sesamum indicum methionine adenosyltransferase 2 subunit beta (LOC105173181), mRNA	-	-	-	http://www.genome.jp/dbget-bin/www_bget?ko:-	Q9NZL9	204	1.3e-14	Methionine adenosyltransferase 2 subunit beta OS=Homo sapiens OX=9606 GN=MAT2B PE=1 SV=1	PF00927//PF01370//PF01073//PF01118	Transglutaminase family, C-terminal ig like domain//NAD dependent epimerase/dehydratase family//3-beta hydroxysteroid dehydrogenase/isomerase family//Semialdehyde dehydrogenase, NAD binding domain	GO:0018149//GO:0055114//GO:0008207//GO:0008210//GO:0006694//GO:0008209	peptide cross-linking//oxidation-reduction process//C21-steroid hormone metabolic process//estrogen metabolic process//steroid biosynthetic process//androgen metabolic process	GO:0051287//GO:0003854//GO:0003824//GO:0016616//GO:0016620//GO:0050662//GO:0003810	NAD binding//3-beta-hydroxy-delta5-steroid dehydrogenase activity//catalytic activity//oxidoreductase activity, acting on the CH-OH group of donors, NAD or NADP as acceptor//oxidoreductase activity, acting on the aldehyde or oxo group of donors, NAD or NADP as acceptor//obsolete coenzyme binding//protein-glutamine gamma-glutamyltransferase activity	--	--	--	--	FALSE	0.499074	0.578927	FALSE	-0.340466	0.793496	FALSE	0.0478919	1	FALSE	-0.44138	0.74216	FALSE	-0.83156	0.18491
Cluster-11149.47948	0	0	0	0	3.32	405	1343975436	XP_023871928.1	210	1.3e-14	UPF0659 protein C216.03-like [Quercus suber]	--	--	--	--	--	--	--	--	--	--	--	--	--	PF01118	Semialdehyde dehydrogenase, NAD binding domain	GO:0055114	oxidation-reduction process	GO:0051287//GO:0016620	NAD binding//oxidoreductase activity, acting on the aldehyde or oxo group of donors, NAD or NADP as acceptor	--	--	--	--	FALSE	-5.13e-15	1	FALSE	-6.82563	0.00631043	DOWN	-6.74066	0.00373694	FALSE	0	1	FALSE	-6.50228	0.00984351
Cluster-11149.28003	3.71	6.51	6.05	6.88	4.78	1710	747057101	XP_011074837.1	369	2e-32	aldehyde dehydrogenase [Sesamum indicum]	--	--	--	--	--	K00128	ALDH	aldehyde dehydrogenase (NAD+)	http://www.genome.jp/dbget-bin/www_bget?ko:K00128	Q70DU8	324	1.3e-28	Aldehyde dehydrogenase family 3 member H1 OS=Arabidopsis thaliana OX=3702 GN=ALDH3H1 PE=1 SV=2	PF00171	Aldehyde dehydrogenase family	GO:0055114	oxidation-reduction process	GO:0016491	oxidoreductase activity	--	--	KOG2456	Aldehyde dehydrogenase	FALSE	0.123638	1	FALSE	0.129465	1	FALSE	0.142374	0.928277	FALSE	-0.215322	0.942231	FALSE	-0.135817	0.962988
Cluster-3429.0	0	0	0	0	2.22	345	1344015987	XP_023890712.1	202	9.4e-14	NADP-dependent alcohol dehydrogenase 7-like [Quercus suber]	--	--	--	--	--	K00083	E1.1.1.195	cinnamyl-alcohol dehydrogenase	http://www.genome.jp/dbget-bin/www_bget?ko:K00083	C0SPA5	179	1.7e-12	Probable formaldehyde dehydrogenase AdhA OS=Bacillus subtilis (strain 168) OX=224308 GN=adhA PE=2 SV=1	PF02826//PF00107//PF03446	D-isomer specific 2-hydroxyacid dehydrogenase, NAD binding domain//Zinc-binding dehydrogenase//NAD binding domain of 6-phosphogluconate dehydrogenase	GO:0055114	oxidation-reduction process	GO:0051287//GO:0050661	NAD binding//NADP binding	--	--	--	--	FALSE	-5.13e-15	1	FALSE	-5.58029	0.144338	FALSE	-5.49639	0.165707	FALSE	0	1	FALSE	-5.26135	0.169928
Cluster-11149.27461	6.01	7.84	6.38	14.96	9.44	4802	747067586	XP_011080521.1	5951	0	indole-3-acetaldehyde oxidase [Sesamum indicum]	XM_011082219.2	XM_011082219	2326	0	PREDICTED: Sesamum indicum indole-3-acetaldehyde oxidase (LOC105163763), mRNA	K09842	AAO3	abscisic-aldehyde oxidase	http://www.genome.jp/dbget-bin/www_bget?ko:K09842	Q7G9P4	4151	0	Abscisic-aldehyde oxidase OS=Arabidopsis thaliana OX=3702 GN=AAO3 PE=1 SV=1	PF00111//PF02738//PF01799//PF00941	2Fe-2S iron-sulfur cluster binding domain//Molybdopterin-binding domain of aldehyde dehydrogenase//[2Fe-2S] binding domain//FAD binding domain in molybdopterin dehydrogenase	GO:0006118//GO:0055114	obsolete electron transport//oxidation-reduction process	GO:0009055//GO:0016491//GO:0051536//GO:0046872	electron transfer activity//oxidoreductase activity//iron-sulfur cluster binding//metal ion binding	--	--	KOG0430	Xanthine dehydrogenase	FALSE	-0.732346	0.25601	FALSE	0.267442	0.806702	FALSE	-0.575663	0.316258	FALSE	-0.639353	0.353353	FALSE	-0.421905	0.518297
Cluster-11149.32269	14.85	34.42	35.7	59.1	34.67	766	747047127	XP_011069490.1	731	9.5e-75	aldehyde dehydrogenase-like [Sesamum indicum]	XM_011071188.2	XM_011071188	252	7.14e-127	PREDICTED: Sesamum indicum aldehyde dehydrogenase-like (LOC105155310), mRNA	K00128	ALDH	aldehyde dehydrogenase (NAD+)	http://www.genome.jp/dbget-bin/www_bget?ko:K00128	Q8VXQ2	649	1.2e-66	Aldehyde dehydrogenase OS=Craterostigma plantagineum OX=4153 GN=ALDH PE=1 SV=1	PF00171	Aldehyde dehydrogenase family	GO:0055114	oxidation-reduction process	GO:0016491	oxidoreductase activity	--	--	KOG2456	Aldehyde dehydrogenase	FALSE	-0.567215	0.455553	FALSE	0.370599	0.696588	FALSE	-0.307354	0.694403	FALSE	-1.32616	0.0147639	FALSE	-1.00548	0.0611024
Cluster-11149.32968	7.08	7.98	5.3	12.19	6.11	5752	747100814	XP_011098511.1	3539	0	DNA repair protein UVH3 isoform X1 [Sesamum indicum]	XM_020699006.1	XM_020699006	916	0	PREDICTED: Sesamum indicum DNA repair protein UVH3 (LOC105177159), transcript variant X2, mRNA	K10846	ERCC5, XPG, RAD2	DNA excision repair protein ERCC-5	http://www.genome.jp/dbget-bin/www_bget?ko:K10846	Q9ATY5	1198	1.9e-129	DNA repair protein UVH3 OS=Arabidopsis thaliana OX=3702 GN=UVH3 PE=2 SV=1	PF09308//PF00612//PF02738//PF00867//PF00752	LuxQ, periplasmic//IQ calmodulin-binding motif//Molybdopterin-binding domain of aldehyde dehydrogenase//XPG I-region//XPG N-terminal domain	GO:0016310//GO:0006281//GO:0055114	phosphorylation//DNA repair//oxidation-reduction process	GO:0004518//GO:0004673//GO:0005515//GO:0016791//GO:0016491	nuclease activity//protein histidine kinase activity//protein binding//phosphatase activity//oxidoreductase activity	GO:0009365	protein histidine kinase complex	KOG2520	5'-3' exonuclease	FALSE	-0.41213	0.651408	FALSE	0.601495	0.370591	FALSE	0.0785963	1	FALSE	-0.106345	1	FALSE	0.445132	0.478313
Cluster-11149.1915	0	0	0	0.4	7.8	1612	672116845	XP_008781593.1	955	2.1e-100	aldehyde dehydrogenase family 3 member H1 [Phoenix dactylifera]	--	--	--	--	--	K00128	ALDH	aldehyde dehydrogenase (NAD+)	http://www.genome.jp/dbget-bin/www_bget?ko:K00128	P30838	967	3.3e-103	Aldehyde dehydrogenase, dimeric NADP-preferring OS=Homo sapiens OX=9606 GN=ALDH3A1 PE=1 SV=3	PF05893//PF00171	Acyl-CoA reductase (LuxC)//Aldehyde dehydrogenase family	GO:0055114//GO:0006118//GO:0008218	oxidation-reduction process//obsolete electron transport//bioluminescence	GO:0016491//GO:0003995	oxidoreductase activity//acyl-CoA dehydrogenase activity	--	--	KOG2456	Aldehyde dehydrogenase	FALSE	-6.58957	0.0107999	DOWN	-4.65739	1.53e-14	DOWN	-11.0912	6.94e-22	FALSE	-6.41739	0.0151633	DOWN	-10.8505	2.15e-20
Cluster-11149.46649	0.05	0	0	1.56	33.44	2003	1276244858	PIN05112.1	2176	6.9e-242	Acyl-CoA reductase [Handroanthus impetiginosus]	XM_011086773.2	XM_011086773	339	8.32e-175	PREDICTED: Sesamum indicum fatty acyl-CoA reductase 2 (LOC105167171), mRNA	K13356	FAR	alcohol-forming fatty acyl-CoA reductase	http://www.genome.jp/dbget-bin/www_bget?ko:K13356	Q08891	1177	1.8e-127	Fatty acyl-CoA reductase 2 OS=Arabidopsis thaliana OX=3702 GN=FAR2 PE=1 SV=2	PF01118//PF03435//PF01370//PF01073	Semialdehyde dehydrogenase, NAD binding domain//Saccharopine dehydrogenase NADP binding domain//NAD dependent epimerase/dehydratase family//3-beta hydroxysteroid dehydrogenase/isomerase family	GO:0008207//GO:0055114//GO:0008210//GO:0006694//GO:0008209	C21-steroid hormone metabolic process//oxidation-reduction process//estrogen metabolic process//steroid biosynthetic process//androgen metabolic process	GO:0003854//GO:0016491//GO:0051287//GO:0016616//GO:0003824//GO:0016620//GO:0050662	3-beta-hydroxy-delta5-steroid dehydrogenase activity//oxidoreductase activity//NAD binding//oxidoreductase activity, acting on the CH-OH group of donors, NAD or NADP as acceptor//catalytic activity//oxidoreductase activity, acting on the aldehyde or oxo group of donors, NAD or NADP as acceptor//obsolete coenzyme binding	--	--	KOG1221	Acyl-CoA reductase	DOWN	-8.89946	1.38e-09	DOWN	-4.81179	3.65e-19	DOWN	-13.5548	1.66e-38	DOWN	-4.27878	9.35e-06	DOWN	-9.12664	1.74e-33
Cluster-11149.37609	0.19	0.88	0.19	0.75	0.29	701	--	--	--	--	--	--	--	--	--	--	--	--	--	--	--	--	--	--	PF02738	Molybdopterin-binding domain of aldehyde dehydrogenase	GO:0055114	oxidation-reduction process	GO:0016491	oxidoreductase activity	--	--	--	--	FALSE	0.42754	0.999455	FALSE	0.96556	0.875047	FALSE	1.28172	0.453271	FALSE	-1.28049	0.841577	FALSE	-0.361866	1
Cluster-11149.32309	3.65	6.12	3.77	6.06	3.92	6075	1350320330	XP_024036823.1	2926	0	uncharacterized protein LOC112096862 [Citrus clementina]	XM_011073314.2	XM_011073314	958	0	PREDICTED: Sesamum indicum probable aldehyde dehydrogenase (LOC105157020), mRNA	-	-	-	http://www.genome.jp/dbget-bin/www_bget?ko:-	Q8VZC3	2260	1.5e-252	Delta-1-pyrroline-5-carboxylate dehydrogenase 12A1, mitochondrial OS=Arabidopsis thaliana OX=3702 GN=ALDH12A1 PE=2 SV=1	PF00806//PF00171//PF13456	Pumilio-family RNA binding repeat//Aldehyde dehydrogenase family//Reverse transcriptase-like	GO:0051252//GO:0055114	regulation of RNA metabolic process//oxidation-reduction process	GO:0003676//GO:0004523//GO:0003723//GO:0016491	nucleic acid binding//RNA-DNA hybrid ribonuclease activity//RNA binding//oxidoreductase activity	--	--	--	--	FALSE	0.211347	0.951385	FALSE	0.232553	0.874359	FALSE	0.333128	0.644278	FALSE	-0.0559516	1	FALSE	0.126595	0.964148
Cluster-10433.0	0.29	0.58	0	1.15	3.5	397	1276240925	PIN02283.1	239	5.6e-18	putative membrane protein [Handroanthus impetiginosus]	XR_848893.2	XR_848893	108	3.97e-47	PREDICTED: Sesamum indicum uncharacterized LOC105175248 (LOC105175248), ncRNA	-	-	-	http://www.genome.jp/dbget-bin/www_bget?ko:-	--	--	--	--	PF01118//PF06624	Semialdehyde dehydrogenase, NAD binding domain//Ribosome associated membrane protein RAMP4	GO:0055114	oxidation-reduction process	GO:0016620//GO:0051287	oxidoreductase activity, acting on the aldehyde or oxo group of donors, NAD or NADP as acceptor//NAD binding	GO:0005783	endoplasmic reticulum	--	--	FALSE	-0.704765	1	FALSE	-1.97162	0.11704	FALSE	-2.77464	0.051137	FALSE	-1.2428	0.942231	FALSE	-3.23781	0.0411845
Cluster-2212.0	0	0	0	0	3.34	417	1344001231	XP_023882895.1	602	4.7e-60	aldehyde dehydrogenase [Quercus suber]	XM_003053685.1	XM_003053685	321	1.64e-165	Nectria haematococca mpVI 77-13-4 predicted protein, mRNA	K00128	ALDH	aldehyde dehydrogenase (NAD+)	http://www.genome.jp/dbget-bin/www_bget?ko:K00128	P08157	596	8.9e-61	Aldehyde dehydrogenase OS=Emericella nidulans (strain FGSC A4 / ATCC 38163 / CBS 112.46 / NRRL 194 / M139) OX=227321 GN=aldA PE=3 SV=2	PF00171	Aldehyde dehydrogenase family	GO:0055114	oxidation-reduction process	GO:0016491	oxidoreductase activity	--	--	KOG2450	Aldehyde dehydrogenase	FALSE	-5.13e-15	1	DOWN	-6.94013	0.00260569	DOWN	-6.8551	0.00238337	FALSE	0	1	FALSE	-6.61653	0.00625347
Cluster-11149.22287	6.79	7.66	6.17	37.01	48.64	3441	747057101	XP_011074837.1	1038	1.1e-109	aldehyde dehydrogenase [Sesamum indicum]	XM_012998045.1	XM_012998045	275	5.44e-139	PREDICTED: Erythranthe guttatus aldehyde dehydrogenase (LOC105973045), transcript variant X2, mRNA	K00128	ALDH	aldehyde dehydrogenase (NAD+)	http://www.genome.jp/dbget-bin/www_bget?ko:K00128	Q8VXQ2	903	1.9e-95	Aldehyde dehydrogenase OS=Craterostigma plantagineum OX=4153 GN=ALDH PE=1 SV=1	PF00171	Aldehyde dehydrogenase family	GO:0055114	oxidation-reduction process	GO:0016491	oxidoreductase activity	--	--	KOG2456	Aldehyde dehydrogenase	DOWN	-2.07203	2.4e-05	FALSE	-0.789994	0.188068	DOWN	-2.97275	3.67e-10	DOWN	-1.77026	0.000370868	DOWN	-2.61021	3.54e-08
Cluster-11149.28071	4.12	6.96	5.13	9.07	3.85	3009	747081377	XP_011087969.1	2038	1e-225	methylmalonate-semialdehyde dehydrogenase [acylating], mitochondrial [Sesamum indicum]	XM_011089667.2	XM_011089667	1048	0	PREDICTED: Sesamum indicum methylmalonate-semialdehyde dehydrogenase [acylating], mitochondrial (LOC105169296), mRNA	K00140	mmsA, iolA, ALDH6A1	malonate-semialdehyde dehydrogenase (acetylating) / methylmalonate-semialdehyde dehydrogenase [EC:1.2.1.18 1.2.1.27]	http://www.genome.jp/dbget-bin/www_bget?ko:K00140	Q0WM29	1008	1.1e-107	Methylmalonate-semialdehyde dehydrogenase [acylating], mitochondrial OS=Arabidopsis thaliana OX=3702 GN=ALDH6B2 PE=1 SV=2	PF00171//PF00146	Aldehyde dehydrogenase family//NADH dehydrogenase	GO:0055114	oxidation-reduction process	GO:0016491	oxidoreductase activity	GO:0016020	membrane	KOG2449	Methylmalonate semialdehyde dehydrogenase	FALSE	-0.18218	0.993212	FALSE	0.841028	0.171723	FALSE	0.548086	0.374382	FALSE	-0.46343	0.578149	FALSE	0.327564	0.683905
Cluster-11149.48310	0	0	0	0	1.92	990	1344000219	XP_023882337.1	1160	2.2e-124	probable aspartate-semialdehyde dehydrogenase [Quercus suber]	XM_008095322.1	XM_008095322	369	0	Colletotrichum graminicola M1.001 aspartate-semialdehyde dehydrogenase partial mRNA	K00133	asd	aspartate-semialdehyde dehydrogenase	http://www.genome.jp/dbget-bin/www_bget?ko:K00133	P78780	935	1e-99	Probable aspartate-semialdehyde dehydrogenase OS=Schizosaccharomyces pombe (strain 972 / ATCC 24843) OX=284812 GN=SPCC1827.06c PE=1 SV=2	PF02774//PF01118	Semialdehyde dehydrogenase, dimerisation domain//Semialdehyde dehydrogenase, NAD binding domain	GO:0055114//GO:0008652	oxidation-reduction process//cellular amino acid biosynthetic process	GO:0051287//GO:0046983//GO:0016620	NAD binding//protein dimerization activity//oxidoreductase activity, acting on the aldehyde or oxo group of donors, NAD or NADP as acceptor	--	--	KOG4777	Aspartate-semialdehyde dehydrogenase	FALSE	-5.13e-15	1	DOWN	-8.27694	7.83e-07	DOWN	-8.19148	5.42e-07	FALSE	0	1	DOWN	-7.95154	3.22e-06
Cluster-11149.28755	46.69	28.7	86.86	0	0	1204	1137228115	OMO92143.1	356	4.6e-31	hypothetical protein COLO4_17836 [Corchorus olitorius]	XM_011089712.2	XM_011089712	133	1.62e-60	PREDICTED: Sesamum indicum malate dehydrogenase, glyoxysomal-like (LOC105169330), mRNA	K00026	MDH2	malate dehydrogenase	http://www.genome.jp/dbget-bin/www_bget?ko:K00026	P46488	346	2.5e-31	Malate dehydrogenase, glyoxysomal OS=Cucumis sativus OX=3659 GN=MDHG PE=2 SV=1	PF01118//PF00056	Semialdehyde dehydrogenase, NAD binding domain//lactate/malate dehydrogenase, NAD binding domain	GO:0055114	oxidation-reduction process	GO:0016491//GO:0016620//GO:0051287	oxidoreductase activity//oxidoreductase activity, acting on the aldehyde or oxo group of donors, NAD or NADP as acceptor//NAD binding	--	--	KOG1494	NAD-dependent malate dehydrogenase	UP	12.419	2.19e-30	FALSE	0	1	UP	12.1517	1.46e-27	UP	13.4128	4.15e-37	UP	13.1395	1.43e-35
Cluster-514.0	0	0	0	0	1.63	779	694453019	XP_009351328.1	155	6e-08	PREDICTED: PGA2-homolog C27.01c-like [Pyrus x bretschneideri]	--	--	--	--	--	--	--	--	--	--	--	--	--	PF00171	Aldehyde dehydrogenase family	GO:0055114	oxidation-reduction process	GO:0016491	oxidoreductase activity	--	--	--	--	FALSE	-5.13e-15	1	DOWN	-7.5575	0.000151788	DOWN	-7.47222	8.15e-05	FALSE	0	1	DOWN	-7.23286	0.000301576
Cluster-11149.37987	2.27	3.74	1.38	0.93	1.05	3452	1276244403	PIN04775.1	1704	6.4e-187	E3 ubiquitin ligase involved in syntaxin degradation [Handroanthus impetiginosus]	XM_012987878.1	XM_012987878	188	1.26e-90	PREDICTED: Erythranthe guttatus myosin heavy chain, striated muscle-like (LOC105963472), mRNA	-	-	-	http://www.genome.jp/dbget-bin/www_bget?ko:-	P35579	217	6.6e-16	Myosin-9 OS=Homo sapiens OX=9606 GN=MYH9 PE=1 SV=4	PF02738//PF00010	Molybdopterin-binding domain of aldehyde dehydrogenase//Helix-loop-helix DNA-binding domain	GO:0055114	oxidation-reduction process	GO:0016491//GO:0046983	oxidoreductase activity//protein dimerization activity	--	--	--	--	UP	2.19946	3.39e-05	FALSE	-0.559368	0.540202	UP	1.52917	0.00369534	UP	1.95348	0.000345984	FALSE	1.34399	0.0140956
Cluster-7856.0	2.16	0	0	0	0	1001	1552251594	RVW97569.1	867	2.1e-90	Transposon Ty3-G Gag-Pol polyprotein [Vitis vinifera]	--	--	--	--	--	-	-	-	http://www.genome.jp/dbget-bin/www_bget?ko:-	--	--	--	--	PF02738//PF07267	Molybdopterin-binding domain of aldehyde dehydrogenase//Nucleopolyhedrovirus capsid protein P87	GO:0055114	oxidation-reduction process	GO:0016491	oxidoreductase activity	GO:0019028	viral capsid	--	--	FALSE	-5.13e-15	1	FALSE	0	1	FALSE	0	1	UP	8.63083	6.88e-08	UP	8.35827	1.69e-07
Cluster-11149.15022	9.54	12.85	13.68	16.76	11.05	4594	1600638821	TEY23682.1	2298	1.1e-255	hypothetical protein Saspl_040422 [Salvia splendens]	XM_011078282.2	XM_011078282	967	0	PREDICTED: Sesamum indicum transmembrane protein 87A-like (LOC105160792), mRNA	-	-	-	http://www.genome.jp/dbget-bin/www_bget?ko:-	Q949Q0	906	1.1e-95	Glycerol-3-phosphate dehydrogenase [NAD(+)] 2, chloroplastic OS=Arabidopsis thaliana OX=3702 GN=GLY1 PE=1 SV=1	PF07479//PF03435//PF06814//PF01210//PF01118//PF07992	NAD-dependent glycerol-3-phosphate dehydrogenase C-terminus//Saccharopine dehydrogenase NADP binding domain//Lung seven transmembrane receptor//NAD-dependent glycerol-3-phosphate dehydrogenase N-terminus//Semialdehyde dehydrogenase, NAD binding domain//Pyridine nucleotide-disulphide oxidoreductase	GO:0055114//GO:0046168//GO:0006072//GO:0046486//GO:0005975	oxidation-reduction process//glycerol-3-phosphate catabolic process//glycerol-3-phosphate metabolic process//glycerolipid metabolic process//carbohydrate metabolic process	GO:0016616//GO:0004367//GO:0016491//GO:0051287//GO:0016620	oxidoreductase activity, acting on the CH-OH group of donors, NAD or NADP as acceptor//glycerol-3-phosphate dehydrogenase [NAD+] activity//oxidoreductase activity//NAD binding//oxidoreductase activity, acting on the aldehyde or oxo group of donors, NAD or NADP as acceptor	GO:0016021//GO:0009331	integral component of membrane//glycerol-3-phosphate dehydrogenase complex	KOG2568	Predicted membrane protein	FALSE	-0.183449	0.980274	FALSE	0.205913	0.908074	FALSE	-0.088308	1	FALSE	-0.13687	1	FALSE	0.0190368	1
Cluster-11149.20822	23.68	42.84	37.77	41.69	23.16	2194	848925102	XP_012858560.1	1306	5.8e-141	PREDICTED: delta-1-pyrroline-5-carboxylate synthase [Erythranthe guttata]	XM_020693440.1	XM_020693440	658	0	PREDICTED: Sesamum indicum delta-1-pyrroline-5-carboxylate synthase-like (LOC105160941), transcript variant X2, mRNA	K12657	ALDH18A1, P5CS	delta-1-pyrroline-5-carboxylate synthetase [EC:2.7.2.11 1.2.1.41]	http://www.genome.jp/dbget-bin/www_bget?ko:K12657	O04015	1222	1.2e-132	Delta-1-pyrroline-5-carboxylate synthase OS=Actinidia deliciosa OX=3627 PE=2 SV=1	PF00171	Aldehyde dehydrogenase family	GO:0055114	oxidation-reduction process	GO:0016491	oxidoreductase activity	--	--	KOG4165	Gamma-glutamyl phosphate reductase	FALSE	0.240475	0.891088	FALSE	0.451882	0.557539	FALSE	0.581577	0.306138	FALSE	-0.141136	1	FALSE	0.260735	0.742995
Cluster-11149.29103	15.83	29.41	20.94	33.19	20.58	2529	1276251018	PIN09802.1	2368	4.8e-264	ATP-dependent RNA helicase [Handroanthus impetiginosus]	XM_011093631.2	XM_011093631	1141	0	PREDICTED: Sesamum indicum DEAD-box ATP-dependent RNA helicase 8 (LOC105172256), mRNA	K12614	DDX6, RCK, DHH1	ATP-dependent RNA helicase DDX6/DHH1	http://www.genome.jp/dbget-bin/www_bget?ko:K12614	Q8RXK6	2111	1.1e-235	DEAD-box ATP-dependent RNA helicase 8 OS=Arabidopsis thaliana OX=3702 GN=RH8 PE=2 SV=1	PF00171//PF00270//PF04851	Aldehyde dehydrogenase family//DEAD/DEAH box helicase//Type III restriction enzyme, res subunit	GO:0055114	oxidation-reduction process	GO:0003676//GO:0016787//GO:0016491//GO:0005524//GO:0003677	nucleic acid binding//hydrolase activity//oxidoreductase activity//ATP binding//DNA binding	--	--	KOG0326	ATP-dependent RNA helicase	FALSE	0.0265035	1	FALSE	0.293074	0.794971	FALSE	0.208801	0.818649	FALSE	-0.392654	0.685691	FALSE	-0.149582	0.919678
Cluster-11149.47171	0	0	0	0.16	3.13	1557	1344068421	XP_023917932.1	1635	2.9e-179	uncharacterized protein LOC112029480 [Quercus suber]	XM_032033022.1	XM_032033022	420	0	Colletotrichum fructicola uncharacterized protein (CGMCC3_g5824), partial mRNA	-	-	-	http://www.genome.jp/dbget-bin/www_bget?ko:-	A0QMB9	581	1.8e-58	Succinate-semialdehyde dehydrogenase [NADP(+)] OS=Mycobacterium avium (strain 104) OX=243243 GN=gabD1 PE=3 SV=1	PF05893//PF00171	Acyl-CoA reductase (LuxC)//Aldehyde dehydrogenase family	GO:0008218//GO:0006118//GO:0055114	bioluminescence//obsolete electron transport//oxidation-reduction process	GO:0003995//GO:0016491	acyl-CoA dehydrogenase activity//oxidoreductase activity	--	--	KOG2450	Aldehyde dehydrogenase	FALSE	-5.23483	0.244997	DOWN	-4.63344	3.25e-10	DOWN	-9.71371	9.59e-14	FALSE	-5.06564	0.362672	DOWN	-9.4732	1.38e-12
Cluster-11149.45367	0	0	0	2.77	57.39	1834	1344001231	XP_023882895.1	1851	3.1e-204	aldehyde dehydrogenase [Quercus suber]	XM_003053685.1	XM_003053685	564	0	Nectria haematococca mpVI 77-13-4 predicted protein, mRNA	K00128	ALDH	aldehyde dehydrogenase (NAD+)	http://www.genome.jp/dbget-bin/www_bget?ko:K00128	P40108	1861	8.1e-207	Aldehyde dehydrogenase OS=Davidiella tassiana OX=29918 GN=CLAH10 PE=1 SV=2	PF15234//PF00171	Linker for activation of T-cells//Aldehyde dehydrogenase family	GO:0007165//GO:0055114	signal transduction//oxidation-reduction process	GO:0016491	oxidoreductase activity	GO:0016020	membrane	KOG2450	Aldehyde dehydrogenase	DOWN	-9.5764	7.59e-13	DOWN	-4.76737	2.21e-19	DOWN	-14.1873	5.24e-43	DOWN	-9.40255	1e-10	DOWN	-13.9465	2.68e-41
Cluster-11149.36787	1.26	0	1.15	4.45	1.64	353	--	--	--	--	--	XM_011071188.2	XM_011071188	48	7.88e-14	PREDICTED: Sesamum indicum aldehyde dehydrogenase-like (LOC105155310), mRNA	--	--	--	--	--	--	--	--	--	--	--	--	--	--	--	--	--	--	FALSE	-6.35128	0.0263893	FALSE	1.01546	0.677692	FALSE	-5.18243	0.273386	FALSE	-1.16974	0.652387	FALSE	-0.203093	1
Cluster-11149.31253	15.58	27.78	21.77	24.28	14.97	1578	1276248198	PIN07608.1	1450	8.3e-158	Methylmalonate semialdehyde dehydrogenase [Handroanthus impetiginosus]	XM_011092379.2	XM_011092379	665	0	PREDICTED: Sesamum indicum serine/threonine-protein phosphatase 5 (LOC105171309), mRNA	-	-	-	http://www.genome.jp/dbget-bin/www_bget?ko:-	Q5XEP2	227	2.1e-17	Hsp70-Hsp90 organizing protein 2 OS=Arabidopsis thaliana OX=3702 GN=HOP2 PE=1 SV=1	PF13174//PF14010//PF00515//PF13181//PF13176//PF01239	Tetratricopeptide repeat//Phosphoenolpyruvate carboxylase//Tetratricopeptide repeat//Tetratricopeptide repeat//Tetratricopeptide repeat//Protein prenyltransferase alpha subunit repeat	GO:0015977//GO:0006094//GO:0019643//GO:0018342//GO:0006099	carbon fixation//gluconeogenesis//reductive tricarboxylic acid cycle//protein prenylation//tricarboxylic acid cycle	GO:0005515//GO:0008964//GO:0008318	protein binding//phosphoenolpyruvate carboxylase activity//protein prenyltransferase activity	--	--	KOG0548	Molecular co-chaperone STI1	FALSE	0.397528	0.678129	FALSE	0.300667	0.794971	FALSE	0.587417	0.308987	FALSE	0.0328891	1	FALSE	0.283542	0.718417
Cluster-11149.1703	0	0	0	0.43	7.63	1537	1314674100	AUF72242.1	1201	6.1e-129	aldehyde dehydrogenase 25A1 [Syntrichia caninervis]	CP039681.1	CP039681	35	6.25e-06	Parastagonospora nodorum strain Sn79 chromosome 15	K00130	betB, gbsA	betaine-aldehyde dehydrogenase	http://www.genome.jp/dbget-bin/www_bget?ko:K00130	S0ENH1	793	4.7e-83	Putative aldehyde dehydrogenase FUS7 OS=Gibberella fujikuroi (strain CBS 195.34 / IMI 58289 / NRRL A-6831) OX=1279085 GN=FUS7 PE=2 SV=1	PF05893//PF00171	Acyl-CoA reductase (LuxC)//Aldehyde dehydrogenase family	GO:0055114//GO:0006118//GO:0008218	oxidation-reduction process//obsolete electron transport//bioluminescence	GO:0016491//GO:0003995	oxidoreductase activity//acyl-CoA dehydrogenase activity	--	--	KOG2450	Aldehyde dehydrogenase	FALSE	-6.58957	0.0107999	DOWN	-4.54196	7.09e-14	DOWN	-10.9757	3.75e-21	FALSE	-6.41739	0.0151633	DOWN	-10.735	1.12e-19
Cluster-4598.0	0	0	0	0.35	5.14	1323	1344083196	XP_023925628.1	1213	2.1e-130	malate dehydrogenase, mitochondrial-like [Quercus suber]	XM_003044659.1	XM_003044659	503	0	Nectria haematococca mpVI 77-13-4 predicted protein, mRNA	K00026	MDH2	malate dehydrogenase	http://www.genome.jp/dbget-bin/www_bget?ko:K00026	P17505	1058	7.6e-114	Malate dehydrogenase, mitochondrial OS=Saccharomyces cerevisiae (strain ATCC 204508 / S288c) OX=559292 GN=MDH1 PE=1 SV=2	PF00056//PF01118//PF01073//PF02866	lactate/malate dehydrogenase, NAD binding domain//Semialdehyde dehydrogenase, NAD binding domain//3-beta hydroxysteroid dehydrogenase/isomerase family//lactate/malate dehydrogenase, alpha/beta C-terminal domain	GO:0006694//GO:0008210//GO:0008209//GO:0008207//GO:0055114	steroid biosynthetic process//estrogen metabolic process//androgen metabolic process//C21-steroid hormone metabolic process//oxidation-reduction process	GO:0016620//GO:0016491//GO:0003854//GO:0051287//GO:0016616	oxidoreductase activity, acting on the aldehyde or oxo group of donors, NAD or NADP as acceptor//oxidoreductase activity//3-beta-hydroxy-delta5-steroid dehydrogenase activity//NAD binding//oxidoreductase activity, acting on the CH-OH group of donors, NAD or NADP as acceptor	--	--	KOG1494	NAD-dependent malate dehydrogenase	FALSE	-6.0657	0.0663758	DOWN	-4.23314	9.39e-11	DOWN	-10.1434	3.52e-16	FALSE	-5.89436	0.093697	DOWN	-9.90282	7.3e-15
Cluster-11149.28111	12.81	24.22	17.95	17.77	13.42	1906	848892963	XP_012846538.1	1971	3.9e-218	PREDICTED: DEAD-box ATP-dependent RNA helicase 8-like [Erythranthe guttata]	XM_012991084.1	XM_012991084	867	0	PREDICTED: Erythranthe guttatus DEAD-box ATP-dependent RNA helicase 8-like (LOC105966525), mRNA	K20557	VIP1	transcription factor VIP1	http://www.genome.jp/dbget-bin/www_bget?ko:K20557	Q8RXK6	1884	1.8e-209	DEAD-box ATP-dependent RNA helicase 8 OS=Arabidopsis thaliana OX=3702 GN=RH8 PE=2 SV=1	PF04851//PF00171//PF00270	Type III restriction enzyme, res subunit//Aldehyde dehydrogenase family//DEAD/DEAH box helicase	GO:0055114	oxidation-reduction process	GO:0003676//GO:0016787//GO:0005524//GO:0003677//GO:0016491	nucleic acid binding//hydrolase activity//ATP binding//DNA binding//oxidoreductase activity	--	--	KOG0326	ATP-dependent RNA helicase	FALSE	0.649146	0.359689	FALSE	0.00775837	1	FALSE	0.546124	0.357356	FALSE	0.202068	0.941673	FALSE	0.159821	0.903514
Cluster-11149.8513	2.97	6.26	8.65	61.09	73.78	1946	1600710305	TEY91997.1	1460	7.1e-159	coniferyl-aldehyde dehydrogenase [Salvia splendens]	MH182707.1	MH182707	317	1.37e-162	Buddleja davidii ALDH2C4 mRNA, complete cds	K12355	REF1	coniferyl-aldehyde dehydrogenase	http://www.genome.jp/dbget-bin/www_bget?ko:K12355	Q56YU0	1176	2.3e-127	Aldehyde dehydrogenase family 2 member C4 OS=Arabidopsis thaliana OX=3702 GN=ALDH2C4 PE=1 SV=2	PF00815//PF00171	Histidinol dehydrogenase//Aldehyde dehydrogenase family	GO:0055114//GO:0000105	oxidation-reduction process//histidine biosynthetic process	GO:0016491//GO:0051287//GO:0004399//GO:0046872	oxidoreductase activity//NAD binding//histidinol dehydrogenase activity//metal ion binding	--	--	KOG2450	Aldehyde dehydrogenase	DOWN	-3.08472	3.03e-10	FALSE	-0.668811	0.30444	DOWN	-3.86418	3.32e-15	DOWN	-3.68694	2.07e-13	DOWN	-4.40553	3.26e-18
Cluster-11149.15541	1.89	6.84	6.83	20.34	1.35	1637	747067586	XP_011080521.1	1947	2e-215	indole-3-acetaldehyde oxidase [Sesamum indicum]	XM_011082219.2	XM_011082219	734	0	PREDICTED: Sesamum indicum indole-3-acetaldehyde oxidase (LOC105163763), mRNA	K09842	AAO3	abscisic-aldehyde oxidase	http://www.genome.jp/dbget-bin/www_bget?ko:K09842	Q7G9P4	1464	7.8e-161	Abscisic-aldehyde oxidase OS=Arabidopsis thaliana OX=3702 GN=AAO3 PE=1 SV=1	PF02738//PF09515	Molybdopterin-binding domain of aldehyde dehydrogenase//Thiamine transporter protein (Thia_YuaJ)	GO:0055114//GO:0015888	oxidation-reduction process//thiamine transport	GO:0016491//GO:0015234	oxidoreductase activity//thiamine transmembrane transporter activity	GO:0005886	plasma membrane	KOG0430	Xanthine dehydrogenase	FALSE	-1.36875	0.0118898	UP	3.51186	3.54e-11	UP	2.03225	0.000143166	DOWN	-2.74895	9.51e-08	FALSE	0.712496	0.321882
Cluster-11149.15540	1.36	4.83	6.68	17.74	1.15	814	747067586	XP_011080521.1	1203	1.9e-129	indole-3-acetaldehyde oxidase [Sesamum indicum]	XM_011082219.2	XM_011082219	475	0	PREDICTED: Sesamum indicum indole-3-acetaldehyde oxidase (LOC105163763), mRNA	K09842	AAO3	abscisic-aldehyde oxidase	http://www.genome.jp/dbget-bin/www_bget?ko:K09842	O23887	1010	1.7e-108	Indole-3-acetaldehyde oxidase OS=Zea mays OX=4577 GN=AO1 PE=1 SV=1	PF02738	Molybdopterin-binding domain of aldehyde dehydrogenase	GO:0055114	oxidation-reduction process	GO:0016491	oxidoreductase activity	--	--	KOG0430	Xanthine dehydrogenase	DOWN	-1.66273	0.00316503	UP	3.54175	2.47e-09	FALSE	1.76811	0.00990671	DOWN	-3.02669	2.4e-07	FALSE	0.464125	0.803283
Cluster-11149.47402	0	0	0	0.67	53.54	1129	1343986468	XP_023875133.1	321	4.9e-27	bifunctional pinoresinol-lariciresinol reductase 2-like [Quercus suber]	--	--	--	--	--	-	-	-	http://www.genome.jp/dbget-bin/www_bget?ko:-	P52580	148	2.1e-08	Isoflavone reductase homolog IRL OS=Zea mays OX=4577 GN=IRL PE=2 SV=1	PF02254//PF01370//PF01113//PF01408//PF02629//PF02826//PF02882//PF03446//PF00208//PF01118	TrkA-N domain//NAD dependent epimerase/dehydratase family//Dihydrodipicolinate reductase, N-terminus//Oxidoreductase family, NAD-binding Rossmann fold//CoA binding domain//D-isomer specific 2-hydroxyacid dehydrogenase, NAD binding domain//Tetrahydrofolate dehydrogenase/cyclohydrolase, NAD(P)-binding domain//NAD binding domain of 6-phosphogluconate dehydrogenase//Glutamate/Leucine/Phenylalanine/Va…	GO:0009085//GO:0046487//GO:0009089//GO:0006520//GO:0006813//GO:0055114//GO:0009396	lysine biosynthetic process//glyoxylate metabolic process//lysine biosynthetic process via diaminopimelate//cellular amino acid metabolic process//potassium ion transport//oxidation-reduction process//folic acid-containing compound biosynthetic process	GO:0004488//GO:0016491//GO:0003824//GO:0008839//GO:0050661//GO:0048037//GO:0051287//GO:0016620//GO:0050662	methylenetetrahydrofolate dehydrogenase (NADP+) activity//oxidoreductase activity//catalytic activity//4-hydroxy-tetrahydrodipicolinate reductase//NADP binding//obsolete cofactor binding//NAD binding//oxidoreductase activity, acting on the aldehyde or oxo group of donors, NAD or NADP as acceptor//obsolete coenzyme binding	--	--	--	--	FALSE	-6.69541	0.00700451	DOWN	-6.6955	1.13e-26	DOWN	-13.235	2.77e-36	FALSE	-6.5231	0.00968287	DOWN	-12.9942	1.42e-34
Cluster-11149.8502	15.06	23.3	35.24	31.14	28.78	1053	747089878	XP_011092596.1	1448	9.5e-158	isoflavone reductase homolog [Sesamum indicum]	XM_011094294.2	XM_011094294	502	0	PREDICTED: Sesamum indicum isoflavone reductase homolog (LOC105172735), mRNA	K21568	-	-	http://www.genome.jp/dbget-bin/www_bget?ko:K21568	P52581	1314	1.2e-143	Isoflavone reductase homolog OS=Lupinus albus OX=3870 PE=2 SV=1	PF01118//PF02254//PF01370//PF05190//PF01073	Semialdehyde dehydrogenase, NAD binding domain//TrkA-N domain//NAD dependent epimerase/dehydratase family//MutS family domain IV//3-beta hydroxysteroid dehydrogenase/isomerase family	GO:0008210//GO:0006694//GO:0008209//GO:0006298//GO:0008207//GO:0055114//GO:0006813	estrogen metabolic process//steroid biosynthetic process//androgen metabolic process//mismatch repair//C21-steroid hormone metabolic process//oxidation-reduction process//potassium ion transport	GO:0005524//GO:0016620//GO:0050662//GO:0003854//GO:0051287//GO:0030983//GO:0016616//GO:0003824	ATP binding//oxidoreductase activity, acting on the aldehyde or oxo group of donors, NAD or NADP as acceptor//obsolete coenzyme binding//3-beta-hydroxy-delta5-steroid dehydrogenase activity//NAD binding//mismatched DNA binding//oxidoreductase activity, acting on the CH-OH group of donors, NAD or NADP as acceptor//catalytic activity	--	--	--	--	FALSE	-0.211733	0.956457	FALSE	-0.283661	0.796404	FALSE	-0.606133	0.291894	FALSE	-0.37787	0.735603	FALSE	-0.711485	0.21009
Cluster-11149.47301	0	0	0	0.02	2.71	1979	1344044885	XP_023902451.1	1917	7.4e-212	delta-1-pyrroline-5-carboxylate dehydrogenase, mitochondrial-like [Quercus suber]	CP016232.1	CP016232	390	0	Trichoderma reesei QM6a chromosome I, complete sequence	K00294	E1.2.1.88	1-pyrroline-5-carboxylate dehydrogenase	http://www.genome.jp/dbget-bin/www_bget?ko:K00294	Q9P8I0	1881	4.2e-209	Delta-1-pyrroline-5-carboxylate dehydrogenase, mitochondrial OS=Emericella nidulans (strain FGSC A4 / ATCC 38163 / CBS 112.46 / NRRL 194 / M139) OX=227321 GN=prnC PE=3 SV=2	PF00171	Aldehyde dehydrogenase family	GO:0055114	oxidation-reduction process	GO:0016491	oxidoreductase activity	--	--	KOG2455	Delta-1-pyrroline-5-carboxylate dehydrogenase	FALSE	-3.05854	1	DOWN	-7.00108	1.07e-14	DOWN	-9.91182	7.12e-15	FALSE	-2.90649	1	DOWN	-9.67127	1.32e-13
Cluster-11149.18407	22.86	39.48	30.91	45.77	18.31	2698	1600685809	TEY67806.1	1576	3.5e-172	succinate-semialdehyde dehydrogenase / glutarate-semialdehyde dehydrogenase [Salvia splendens]	XM_011097459.2	XM_011097459	827	0	PREDICTED: Sesamum indicum succinate-semialdehyde dehydrogenase, mitochondrial (LOC105175117), transcript variant X2, mRNA	K17761	SSADH	succinate-semialdehyde dehydrogenase, mitochondrial	http://www.genome.jp/dbget-bin/www_bget?ko:K17761	Q9SAK4	1446	1.6e-158	Succinate-semialdehyde dehydrogenase, mitochondrial OS=Arabidopsis thaliana OX=3702 GN=ALDH5F1 PE=1 SV=2	PF00171	Aldehyde dehydrogenase family	GO:0055114	oxidation-reduction process	GO:0016491	oxidoreductase activity	--	--	KOG2451	Aldehyde dehydrogenase	FALSE	-0.0125321	1	FALSE	0.925746	0.103932	FALSE	0.802432	0.129963	FALSE	-0.32563	0.793554	FALSE	0.550097	0.354091
Cluster-11149.29003	21	18.21	28.93	99.16	54.36	1770	604303509	EYU22982.1	1093	2.3e-116	hypothetical protein MIMGU_mgv1a005625mg [Erythranthe guttata]	XM_011071188.2	XM_011071188	403	0	PREDICTED: Sesamum indicum aldehyde dehydrogenase-like (LOC105155310), mRNA	K00128	ALDH	aldehyde dehydrogenase (NAD+)	http://www.genome.jp/dbget-bin/www_bget?ko:K00128	Q8VXQ2	956	6.8e-102	Aldehyde dehydrogenase OS=Craterostigma plantagineum OX=4153 GN=ALDH PE=1 SV=1	PF00171	Aldehyde dehydrogenase family	GO:0055114	oxidation-reduction process	GO:0016491	oxidoreductase activity	--	--	KOG2456	Aldehyde dehydrogenase	DOWN	-2.24251	3.93e-06	FALSE	0.470667	0.540202	DOWN	-1.88258	7.48e-05	DOWN	-1.56554	0.00189657	FALSE	-1.14486	0.0235491
[truncated: 13 more columns]
