# Supplementary material for: Transcriptome Analysis Provides Insights into Catalpol Biosynthesis in the Medicinal Plant Rehmannia glutinosa and the Functional Characterization of RgGES Genes
Source: Genes (Basel). 2024 Jan 24;15(2):155. doi: 10.3390/genes15020155 (PMC10888080; doi:10.3390/genes15020155)
Supplement: Supplementary file 1 [file genes-15-00155-s001.zip › Supplementary Table S11.xlsx]

## Sheet: CYP450
Supplementary Table S11. CYP450 unigenes identified in R. glutinosa transcriptomes. Putative CYP450 genes in catalpol biosynthesis which met the gene screening criteria were showed in red color. The CYP450 unigenes which were classified into CYP72 and CYP76 family were listed in sheet2 and sheet 3, respectively.
gene_id	Fpkm(HFL)	Fpkm(BJL)	Fpkm(J9L)	Fpkm(J9R)	Fpkm(J9AR)	Gene Length	NR GI	NR ID	NR Score	NR Evalue	NR Description	NT GI	NT ID	NT Score	NT Evalue	NT Description	KO ID	KO Name	KO Description	Http Link	Swissprot ID	Swissprot Score	Swissprot Evalue	Swissprot Description	PFAM ID	PFAM description	Gene Ontology Biological Pathway	BP Description	Gene Ontology Molecular Function	MF Description	Gene Ontology Cellular Component	CC Description	KOG ID	KOG Description	UP_DOWN_REGULATION(BJ_LvsJ9_R)	log2FC(BJ_LvsJ9_R)	q value(BJ_LvsJ9_R)	UP_DOWN_REGULATION(J9_RvsJ9_X)	log2FC(J9_RvsJ9_X)	q value(J9_RvsJ9_X)	UP_DOWN_REGULATION(BJ_LvsJ9_X)	log2FC(BJ_LvsJ9_X)	q value(BJ_LvsJ9_X)	UP_DOWN_REGULATION(HF_LvsJ9_R)	log2FC(HF_LvsJ9_R)	q value(HF_LvsJ9_R)	UP_DOWN_REGULATION(HF_LvsJ9_X)	log2FC(HF_LvsJ9_X)	q value(HF_LvsJ9_X)
Cluster-11149.30874	138.73	97.09	668.93	1	0.78	972	747093273	XP_011094434.1	1569	8.2e-172	cytochrome P450 76A1-like [Sesamum indicum]	--	--	--	--	--	K20618	CYP76A	cytochrome P450 family 76 subfamily A	http://www.genome.jp/dbget-bin/www_bget?ko:K20618	W8JIS5	1346	2.2e-147	Iridoid oxidase OS=Catharanthus roseus OX=4058 GN=IO PE=1 SV=1	PF00067	Cytochrome P450	GO:0055114	oxidation-reduction process	GO:0005506//GO:0020037//GO:0016705	iron ion binding//heme binding//oxidoreductase activity, acting on paired donors, with incorporation or reduction of molecular oxygen	--	--	--	--	UP	6.80223	7.31e-30	FALSE	-0.0373147	1	UP	6.65286	2.72e-28	UP	7.77703	1.46e-36	UP	7.68763	5.34e-35
Cluster-11149.22060	94.44	108.07	291.59	132.81	10.4	1805	1276240750	PIN02149.1	1721	3.6e-189	Cytochrome P450 CYP4/CYP19/CYP26 subfamily [Handroanthus impetiginosus]	CP046694.1	CP046694	37	5.69e-07	Solanum tuberosum cultivar MSH/14-112 chromosome 10	-	-	-	http://www.genome.jp/dbget-bin/www_bget?ko:-	H2DH21	1181	5.7e-128	Cytochrome P450 CYP72A219 OS=Panax ginseng OX=4054 PE=2 SV=1	PF07225//PF00067	NADH-ubiquinone oxidoreductase B15 subunit (NDUFB4)//Cytochrome P450	GO:0006744//GO:0055114//GO:0006120//GO:0006814	ubiquinone biosynthetic process//oxidation-reduction process//mitochondrial electron transport, NADH to ubiquinone//sodium ion transport	GO:0008137//GO:0020037//GO:0016705//GO:0005506	NADH dehydrogenase (ubiquinone) activity//heme binding//oxidoreductase activity, acting on paired donors, with incorporation or reduction of molecular oxygen//iron ion binding	GO:0005739	mitochondrion	--	--	FALSE	-0.09492	1	UP	3.27734	2.05e-11	UP	3.07162	1.17e-10	FALSE	0.182308	0.962475	UP	3.40955	1.58e-12
Cluster-11149.30462	102.72	24.55	268.69	28.06	3.89	2802	1276240750	PIN02149.1	691	1.5e-69	Cytochrome P450 CYP4/CYP19/CYP26 subfamily [Handroanthus impetiginosus]	XM_007133159.1	XM_007133159	47	2.45e-12	Phaseolus vulgaris hypothetical protein (PHAVU_011G161600g) mRNA, complete cds	-	-	-	http://www.genome.jp/dbget-bin/www_bget?ko:-	H1A981	457	7.9e-44	11-oxo-beta-amyrin 30-oxidase OS=Medicago truncatula OX=3880 GN=CYP72A63 PE=1 SV=1	PF00067	Cytochrome P450	GO:0055114	oxidation-reduction process	GO:0016705//GO:0020037//GO:0005506	oxidoreductase activity, acting on paired donors, with incorporation or reduction of molecular oxygen//heme binding//iron ion binding	--	--	--	--	FALSE	0.00815915	1	UP	2.45353	5.79e-07	UP	2.35088	8.73e-07	UP	2.54792	1.04e-07	UP	4.95128	3.78e-22
Cluster-11149.20093	74.95	28.66	220.14	23.46	0.91	722	747087125	XP_011091093.1	811	4.8e-84	secologanin synthase-like [Sesamum indicum]	XM_011092791.2	XM_011092791	250	8.68e-126	PREDICTED: Sesamum indicum secologanin synthase-like (LOC105171626), mRNA	-	-	-	http://www.genome.jp/dbget-bin/www_bget?ko:-	Q9LUC9	559	3e-56	Cytochrome P450 72A11 OS=Arabidopsis thaliana OX=3702 GN=CYP72A11 PE=2 SV=1	PF00067	Cytochrome P450	GO:0055114	oxidation-reduction process	GO:0005506//GO:0020037//GO:0016705	iron ion binding//heme binding//oxidoreductase activity, acting on paired donors, with incorporation or reduction of molecular oxygen	--	--	--	--	FALSE	0.502569	0.566119	UP	4.2668	1.32e-11	UP	4.65773	3.53e-14	UP	2.34069	2.07e-06	UP	6.55372	5.3e-26
Cluster-11149.27919	56.97	22.88	166.75	37.18	18.8	1955	747102147	XP_011099226.1	1200	1e-128	geraniol 8-hydroxylase-like [Sesamum indicum]	XM_011100924.2	XM_011100924	426	0	PREDICTED: Sesamum indicum geraniol 8-hydroxylase-like (LOC105177688), mRNA	-	-	-	http://www.genome.jp/dbget-bin/www_bget?ko:-	Q8VWZ7	1085	8.3e-117	geraniol 8-hydroxylase OS=Catharanthus roseus OX=4058 GN=CYP76B6 PE=1 SV=1	PF00067	Cytochrome P450	GO:0055114	oxidation-reduction process	GO:0016705//GO:0005506//GO:0020037	oxidoreductase activity, acting on paired donors, with incorporation or reduction of molecular oxygen//iron ion binding//heme binding	--	--	--	--	FALSE	-0.498502	0.550344	FALSE	0.587815	0.387654	FALSE	-0.0214528	1	FALSE	1.28983	0.0136764	UP	1.82761	0.000131961
Cluster-11149.14301	19.03	11.76	156.74	57.51	12.09	1858	1276250037	PIN09027.1	2045	1e-226	Cytochrome P450 CYP4/CYP19/CYP26 subfamily [Handroanthus impetiginosus]	--	--	--	--	--	-	-	-	http://www.genome.jp/dbget-bin/www_bget?ko:-	U5NE19	1125	1.8e-121	7-deoxyloganic acid hydroxylase OS=Catharanthus roseus OX=4058 GN=7DLH PE=1 SV=1	PF00067	Cytochrome P450	GO:0055114	oxidation-reduction process	GO:0005506//GO:0020037//GO:0016705	iron ion binding//heme binding//oxidoreductase activity, acting on paired donors, with incorporation or reduction of molecular oxygen	--	--	--	--	DOWN	-2.08729	2.18e-05	UP	1.85297	0.000190131	FALSE	-0.345056	0.63047	FALSE	-0.921031	0.110949	FALSE	0.881886	0.0994747
Cluster-11149.9949	68.94	13.44	104.62	0.91	0.04	1226	1276242211	PIN03182.1	1000	9.8e-106	Cytochrome P450 CYP4/CYP19/CYP26 subfamily [Handroanthus impetiginosus]	--	--	--	--	--	-	-	-	http://www.genome.jp/dbget-bin/www_bget?ko:-	H2DH21	649	1.9e-66	Cytochrome P450 CYP72A219 OS=Panax ginseng OX=4054 PE=2 SV=1	PF00067	Cytochrome P450	GO:0055114	oxidation-reduction process	GO:0020037//GO:0005506//GO:0016705	heme binding//iron ion binding//oxidoreductase activity, acting on paired donors, with incorporation or reduction of molecular oxygen	--	--	--	--	UP	4.08197	1.02e-12	UP	3.83117	0.00305279	UP	7.7935	1.15e-19	UP	6.90541	2.97e-31	UP	10.6524	2.08e-38
Cluster-11149.20372	25.98	69.21	80.6	27.06	8.11	1450	747084049	XP_011089416.1	1547	4.3e-169	licodione synthase-like [Sesamum indicum]	XM_011091114.2	XM_011091114	550	0	PREDICTED: Sesamum indicum licodione synthase-like (LOC105170377), mRNA	-	-	-	http://www.genome.jp/dbget-bin/www_bget?ko:-	P93149	936	1.2e-99	Licodione synthase OS=Glycyrrhiza echinata OX=46348 GN=CYP93B1 PE=1 SV=2	PF01874//PF00067	ATP:dephospho-CoA triphosphoribosyl transferase//Cytochrome P450	GO:0055114//GO:0016310	oxidation-reduction process//phosphorylation	GO:0016705//GO:0046917//GO:0020037//GO:0005524//GO:0005506	oxidoreductase activity, acting on paired donors, with incorporation or reduction of molecular oxygen//triphosphoribosyl-dephospho-CoA synthase activity//heme binding//ATP binding//iron ion binding	--	--	--	--	UP	1.55831	0.00230217	FALSE	1.34156	0.0126174	UP	2.78905	5.73e-09	FALSE	0.613826	0.369361	UP	1.90527	9.32e-05
Cluster-11149.25288	46.22	58.1	63.48	10.18	3.12	2057	1276265177	PIN21474.1	2391	8.4e-267	Cytochrome P450 CYP4/CYP19/CYP26 subfamily [Handroanthus impetiginosus]	XM_011096262.2	XM_011096262	1026	0	PREDICTED: Sesamum indicum carotene epsilon-monooxygenase, chloroplastic (LOC105174233), mRNA	K09837	LUT1, CYP97C1	carotene epsilon-monooxygenase	http://www.genome.jp/dbget-bin/www_bget?ko:K09837	Q6TBX7	2136	1.2e-238	Carotene epsilon-monooxygenase, chloroplastic OS=Arabidopsis thaliana OX=3702 GN=CYP97C1 PE=1 SV=1	PF00067	Cytochrome P450	GO:0055114	oxidation-reduction process	GO:0016705//GO:0020037//GO:0005506	oxidoreductase activity, acting on paired donors, with incorporation or reduction of molecular oxygen//heme binding//iron ion binding	--	--	--	--	UP	2.71471	2.13e-08	FALSE	1.30945	0.0176237	UP	3.91329	3.31e-15	UP	2.85753	3.75e-09	UP	4.11672	2.43e-16
Cluster-11149.21242	28.8	9.07	63.26	6.04	0.37	3042	1276244781	PIN05054.1	707	2.3e-71	Cytochrome P450 CYP4/CYP19/CYP26 subfamily [Handroanthus impetiginosus]	XM_011092791.2	XM_011092791	139	1.92e-63	PREDICTED: Sesamum indicum secologanin synthase-like (LOC105171626), mRNA	-	-	-	http://www.genome.jp/dbget-bin/www_bget?ko:-	Q05047	389	6.6e-36	Secologanin synthase OS=Catharanthus roseus OX=4058 GN=CYP72A1 PE=1 SV=1	PF00067	Cytochrome P450	GO:0055114	oxidation-reduction process	GO:0016705//GO:0020037//GO:0005506	oxidoreductase activity, acting on paired donors, with incorporation or reduction of molecular oxygen//heme binding//iron ion binding	--	--	--	--	FALSE	0.787373	0.224546	UP	3.62825	8.91e-11	UP	4.30448	4.33e-15	UP	2.92988	1.65e-09	UP	6.50656	3.17e-29
Cluster-11149.10607	19.16	10.45	62.38	7.29	1.84	907	1276240750	PIN02149.1	826	1.1e-85	Cytochrome P450 CYP4/CYP19/CYP26 subfamily [Handroanthus impetiginosus]	CP046694.1	CP046694	37	2.81e-07	Solanum tuberosum cultivar MSH/14-112 chromosome 10	-	-	-	http://www.genome.jp/dbget-bin/www_bget?ko:-	U5NE19	522	7.4e-52	7-deoxyloganic acid hydroxylase OS=Catharanthus roseus OX=4058 GN=7DLH PE=1 SV=1	PF00067//PF07225	Cytochrome P450//NADH-ubiquinone oxidoreductase B15 subunit (NDUFB4)	GO:0006814//GO:0006744//GO:0006120//GO:0055114	sodium ion transport//ubiquinone biosynthetic process//mitochondrial electron transport, NADH to ubiquinone//oxidation-reduction process	GO:0005506//GO:0008137//GO:0020037//GO:0016705	iron ion binding//NADH dehydrogenase (ubiquinone) activity//heme binding//oxidoreductase activity, acting on paired donors, with incorporation or reduction of molecular oxygen	GO:0005739	mitochondrion	--	--	FALSE	0.728443	0.329193	FALSE	1.58451	0.0138192	UP	2.20196	8.71e-05	UP	2.06218	7.2e-05	UP	3.59553	5.21e-11
Cluster-11149.22875	7.73	66.16	44.45	0.36	0.06	1768	1276238350	PIN00593.1	2152	3.7e-239	Cytochrome P450 CYP2 subfamily [Handroanthus impetiginosus]	XM_011087878.2	XM_011087878	778	0	PREDICTED: Sesamum indicum cytochrome P450 77A3-like (LOC105167978), mRNA	-	-	-	http://www.genome.jp/dbget-bin/www_bget?ko:-	O48928	1074	1.4e-115	Cytochrome P450 77A3 OS=Glycine max OX=3847 GN=CYP77A3 PE=2 SV=1	PF00067	Cytochrome P450	GO:0055114	oxidation-reduction process	GO:0016705//GO:0020037//GO:0005506	oxidoreductase activity, acting on paired donors, with incorporation or reduction of molecular oxygen//heme binding//iron ion binding	--	--	--	--	UP	7.70393	3.2e-35	FALSE	2.21659	0.271886	UP	9.80454	1.63e-38	UP	5.07611	6.02e-17	UP	7.22552	2.38e-21
Cluster-11149.29213	9.01	11.4	43.42	21.34	9.46	1946	1276242097	PIN03103.1	1941	1.2e-214	Cytochrome P450 CYP2 subfamily [Handroanthus impetiginosus]	AB234901.1	AB234901	608	0	Verbena x hybrida mRNA for flavonoid 3'-hydroxylase, partial cds, cultivar: Tapien Pink	K05280	E1.14.13.21	flavonoid 3'-monooxygenase	http://www.genome.jp/dbget-bin/www_bget?ko:K05280	Q9SBQ9	1699	5.2e-188	Flavonoid 3'-monooxygenase OS=Petunia hybrida OX=4102 GN=CYP75B2 PE=2 SV=1	PF00067	Cytochrome P450	GO:0055114	oxidation-reduction process	GO:0016705//GO:0020037//GO:0005506	oxidoreductase activity, acting on paired donors, with incorporation or reduction of molecular oxygen//heme binding//iron ion binding	--	--	--	--	FALSE	-0.702703	0.294901	FALSE	0.776982	0.214075	FALSE	-0.0364658	1	FALSE	-0.569569	0.429725	FALSE	0.157398	0.915348
Cluster-11149.34412	5.97	6.22	33.81	0.06	0	1003	747093273	XP_011094434.1	348	3.2e-30	cytochrome P450 76A1-like [Sesamum indicum]	--	--	--	--	--	-	-	-	http://www.genome.jp/dbget-bin/www_bget?ko:-	W8JIS5	313	1.4e-27	Iridoid oxidase OS=Catharanthus roseus OX=4058 GN=IO PE=1 SV=1	PF00067	Cytochrome P450	GO:0055114	oxidation-reduction process	GO:0016705//GO:0005506//GO:0020037	oxidoreductase activity, acting on paired donors, with incorporation or reduction of molecular oxygen//iron ion binding//heme binding	--	--	--	--	UP	6.81365	2.62e-14	FALSE	2.9964	1	UP	9.60515	2.28e-13	UP	7.19491	2.95e-15	UP	9.82835	2.17e-14
Cluster-11149.31016	16.37	29.32	31.34	8.32	6.16	2288	745791037	AJD25227.1	1267	2e-136	cytochrome P450 CYP97B34 [Salvia miltiorrhiza]	XM_020699334.1	XM_020699334	509	0	PREDICTED: Sesamum indicum cytochrome P450 97B2, chloroplastic (LOC105178587), transcript variant X2, mRNA	-	-	-	http://www.genome.jp/dbget-bin/www_bget?ko:-	Q43078	1162	1.1e-125	Cytochrome P450 97B1, chloroplastic OS=Pisum sativum OX=3888 GN=CYP97B1 PE=2 SV=1	PF00067	Cytochrome P450	GO:0055114	oxidation-reduction process	GO:0016705//GO:0020037//GO:0005506	oxidoreductase activity, acting on paired donors, with incorporation or reduction of molecular oxygen//heme binding//iron ion binding	--	--	--	--	UP	2.01868	4.52e-05	FALSE	0.0365657	1	UP	1.94443	4.93e-05	UP	1.65174	0.00115731	UP	1.63824	0.000858
Cluster-11149.37825	7.65	10.4	31.27	0.11	0.08	1833	747062372	XP_011077693.1	1783	2.4e-196	cytochrome P450 83B1-like [Sesamum indicum]	XM_011079391.2	XM_011079391	573	0	PREDICTED: Sesamum indicum cytochrome P450 83B1-like (LOC105161642), mRNA	-	-	-	http://www.genome.jp/dbget-bin/www_bget?ko:-	O65782	1113	4.4e-120	Cytochrome P450 83B1 OS=Arabidopsis thaliana OX=3702 GN=CYP83B1 PE=1 SV=1	PF00067	Cytochrome P450	GO:0055114	oxidation-reduction process	GO:0016705//GO:0020037//GO:0005506	oxidoreductase activity, acting on paired donors, with incorporation or reduction of molecular oxygen//heme binding//iron ion binding	--	--	--	--	UP	6.76287	3.34e-22	FALSE	-0.00927949	1	UP	6.63747	4.33e-20	UP	6.78518	7.54e-22	UP	6.71715	1.23e-20
Cluster-11149.27379	11.76	16.69	30.65	12.82	12.69	957	604320862	EYU31636.1	791	1.3e-81	hypothetical protein MIMGU_mgv1a004595mg [Erythranthe guttata]	XM_023911701.1	XM_023911701	74	8.02e-28	PREDICTED: Lactuca sativa cytochrome P450 CYP72A219-like (LOC111916052), mRNA	-	-	-	http://www.genome.jp/dbget-bin/www_bget?ko:-	H2DH21	685	9.8e-71	Cytochrome P450 CYP72A219 OS=Panax ginseng OX=4054 PE=2 SV=1	PF00067	Cytochrome P450	GO:0055114	oxidation-reduction process	GO:0020037//GO:0005506//GO:0016705	heme binding//iron ion binding//oxidoreductase activity, acting on paired donors, with incorporation or reduction of molecular oxygen	--	--	--	--	FALSE	0.588655	0.445033	FALSE	-0.383673	0.70386	FALSE	0.0942306	1	FALSE	0.544822	0.507827	FALSE	0.111172	1
Cluster-11149.21207	12.55	15.71	27.78	0.24	0	1141	747051778	XP_011071981.1	950	5.7e-100	cytochrome P450 71A8-like [Sesamum indicum]	--	--	--	--	--	K07418	CYP2J	cytochrome P450 family 2 subfamily J	http://www.genome.jp/dbget-bin/www_bget?ko:K07418	Q42716	844	4.3e-89	Cytochrome P450 71A8 OS=Mentha piperita OX=34256 GN=CYP71A8 PE=3 SV=1	PF00067	Cytochrome P450	GO:0055114	oxidation-reduction process	GO:0016705//GO:0005506//GO:0020037	oxidoreductase activity, acting on paired donors, with incorporation or reduction of molecular oxygen//iron ion binding//heme binding	--	--	--	--	UP	6.21655	6.59e-20	FALSE	5.16593	0.357601	UP	11.1841	2.97e-21	UP	6.35307	3.44e-20	UP	11.1455	3.76e-22
Cluster-11149.29079	20.91	26.23	25.4	11.9	3.79	1771	1279029765	XP_022854208.1	2146	1.8e-238	protein LUTEIN DEFICIENT 5, chloroplastic-like [Olea europaea var. sylvestris]	XM_011078786.2	XM_011078786	1038	0	PREDICTED: Sesamum indicum protein LUTEIN DEFICIENT 5, chloroplastic (LOC105161176), mRNA	K15747	LUT5, CYP97A3	beta-ring hydroxylase	http://www.genome.jp/dbget-bin/www_bget?ko:K15747	Q93VK5	2028	3.4e-226	Protein LUTEIN DEFICIENT 5, chloroplastic OS=Arabidopsis thaliana OX=3702 GN=CYP97A3 PE=1 SV=1	PF00067	Cytochrome P450	GO:0055114	oxidation-reduction process	GO:0005506//GO:0020037//GO:0016705	iron ion binding//heme binding//oxidoreductase activity, acting on paired donors, with incorporation or reduction of molecular oxygen	--	--	KOG0157	Cytochrome P450 CYP4/CYP19/CYP26 subfamilies	FALSE	1.34217	0.0120612	FALSE	1.25343	0.0249151	UP	2.48475	3.32e-07	UP	1.48679	0.00407161	UP	2.68999	3.62e-08
Cluster-11149.26879	14.43	30.84	25.18	8.67	2.21	622	747041406	XP_011072860.1	679	8.3e-69	cytochrome P450 86A22 [Sesamum indicum]	XM_011074558.2	XM_011074558	291	1.2e-148	PREDICTED: Sesamum indicum cytochrome P450 86A22 (LOC105157979), mRNA	K15398	CYP86A4S	fatty acid omega-hydroxylase	http://www.genome.jp/dbget-bin/www_bget?ko:K15398	B3RFJ6	621	1.7e-63	Cytochrome P450 86A22 OS=Petunia hybrida OX=4102 GN=CYP86A22 PE=1 SV=1	PF16839//PF00067	Nematode antimicrobial peptide//Cytochrome P450	GO:0098542//GO:0055114	defense response to other organism//oxidation-reduction process	GO:0005506//GO:0020037//GO:0016705	iron ion binding//heme binding//oxidoreductase activity, acting on paired donors, with incorporation or reduction of molecular oxygen	--	--	--	--	UP	2.0475	0.000134865	FALSE	1.56999	0.0305301	UP	3.50621	8.01e-10	FALSE	1.39533	0.0178074	UP	2.9137	6.01e-07
Cluster-11149.22050	8.88	18.97	21.79	0.56	0.49	3404	1276241373	PIN02586.1	1059	3.9e-112	Cytochrome P450 CYP2 subfamily [Handroanthus impetiginosus]	XM_012990041.1	XM_012990041	188	1.24e-90	PREDICTED: Erythranthe guttatus cytochrome P450 82A3-like (LOC105965482), transcript variant X2, mRNA	-	-	-	http://www.genome.jp/dbget-bin/www_bget?ko:-	F2Z9C1	563	4.9e-56	Protopine 6-monooxygenase OS=Eschscholzia californica OX=3467 GN=CYP82N2v2 PE=1 SV=1	PF00067	Cytochrome P450	GO:0055114	oxidation-reduction process	GO:0016705//GO:0005506//GO:0020037	oxidoreductase activity, acting on paired donors, with incorporation or reduction of molecular oxygen//iron ion binding//heme binding	--	--	--	--	UP	5.27537	4.61e-22	FALSE	-0.209981	0.985179	UP	4.95413	2.87e-20	UP	4.65477	8.24e-18	UP	4.39411	2.03e-16
Cluster-11149.41676	5.83	3	19.53	0.11	0.06	1760	747056654	XP_011074592.1	1819	1.5e-200	ferruginol synthase-like, partial [Sesamum indicum]	XM_011076290.2	XM_011076290	469	0	PREDICTED: Sesamum indicum ferruginol synthase-like (LOC105159279), partial mRNA	-	-	-	http://www.genome.jp/dbget-bin/www_bget?ko:-	W8JMV1	1441	3.9e-158	Cytochrome P450 76T24 OS=Catharanthus roseus OX=4058 GN=CYP76T24 PE=2 SV=1	PF00067	Cytochrome P450	GO:0055114	oxidation-reduction process	GO:0005506//GO:0020037//GO:0016705	iron ion binding//heme binding//oxidoreductase activity, acting on paired donors, with incorporation or reduction of molecular oxygen	--	--	--	--	UP	4.90362	4.11e-11	FALSE	0.551111	1	UP	5.33741	3.3e-10	UP	6.3253	6.92e-19	UP	6.81179	8.91e-19
Cluster-11149.21712	3.86	20.29	19.12	0.47	0.17	2057	1276260222	PIN17279.1	1147	1.5e-122	Cytochrome P450 CYP2 subfamily [Handroanthus impetiginosus]	KP337694.1	KP337694	401	0	Salvia miltiorrhiza cytochrome P450 CYP77A28 mRNA, complete cds	-	-	-	http://www.genome.jp/dbget-bin/www_bget?ko:-	P37123	1032	1.2e-110	Cytochrome P450 77A1 (Fragment) OS=Solanum melongena OX=4111 GN=CYP77A1 PE=2 SV=1	PF00067	Cytochrome P450	GO:0055114	oxidation-reduction process	GO:0016705//GO:0020037//GO:0005506	oxidoreductase activity, acting on paired donors, with incorporation or reduction of molecular oxygen//heme binding//iron ion binding	--	--	--	--	UP	5.63416	2.29e-22	FALSE	1.07839	0.443026	UP	6.59999	3.97e-25	UP	3.71346	1.36e-10	UP	4.73728	5.06e-13
Cluster-11149.17007	5.55	5.55	18.66	2.69	1.5	2489	1276242211	PIN03182.1	330	9.8e-28	Cytochrome P450 CYP4/CYP19/CYP26 subfamily [Handroanthus impetiginosus]	--	--	--	--	--	-	-	-	http://www.genome.jp/dbget-bin/www_bget?ko:-	Q05047	233	6.6e-18	Secologanin synthase OS=Catharanthus roseus OX=4058 GN=CYP72A1 PE=1 SV=1	PF04831	Popeye protein conserved region	--	--	--	--	GO:0016020	membrane	--	--	FALSE	1.2428	0.0305436	FALSE	0.449293	0.647473	UP	1.58123	0.00250075	UP	1.71761	0.00114015	UP	2.1166	3.4e-05
Cluster-11149.41391	12.79	5.26	17.55	2.01	0.28	1967	1045858605	ANV21370.1	1962	4.4e-217	cytochrome P450 CYP1 [Sesamum indicum]	XM_011088879.2	XM_011088879	624	0	PREDICTED: Sesamum indicum cytochrome P450 71A9-like (LOC105168734), mRNA	-	-	-	http://www.genome.jp/dbget-bin/www_bget?ko:-	O65782	1150	2.4e-124	Cytochrome P450 83B1 OS=Arabidopsis thaliana OX=3702 GN=CYP83B1 PE=1 SV=1	PF00067	Cytochrome P450	GO:0055114	oxidation-reduction process	GO:0005506//GO:0020037//GO:0016705	iron ion binding//heme binding//oxidoreductase activity, acting on paired donors, with incorporation or reduction of molecular oxygen	--	--	--	--	UP	1.58424	0.00477398	UP	2.46206	0.000323225	UP	3.93471	1.58e-10	UP	3.33889	6.17e-11	UP	5.74766	4.54e-21
Cluster-11149.27831	19.58	22.84	16.52	1.11	0.33	1953	747106680	XP_011101640.1	2240	2.6e-249	cytochrome P450 77A2-like [Sesamum indicum]	XM_011103338.2	XM_011103338	825	0	PREDICTED: Sesamum indicum cytochrome P450 77A2-like (LOC105179689), mRNA	-	-	-	http://www.genome.jp/dbget-bin/www_bget?ko:-	P37124	1943	2.7e-216	Cytochrome P450 77A2 OS=Solanum melongena OX=4111 GN=CYP77A2 PE=2 SV=1	PF00067	Cytochrome P450	GO:0055114	oxidation-reduction process	GO:0016705//GO:0020037//GO:0005506	oxidoreductase activity, acting on paired donors, with incorporation or reduction of molecular oxygen//heme binding//iron ion binding	--	--	--	--	UP	4.55451	1.34e-17	FALSE	1.35955	0.1038	UP	5.80237	1.43e-22	UP	4.80473	5.34e-19	UP	6.11167	3.94e-24
Cluster-11149.42125	2.34	3.56	15.73	0.38	0.08	1895	1276265981	PIN22161.1	500	1.4e-47	Cytochrome P450 [Handroanthus impetiginosus]	XM_022280207.1	XM_022280207	49	1.28e-13	PREDICTED: Momordica charantia fatty acid hydroperoxide lyase, chloroplastic-like (LOC111007736), partial mRNA	K10528	HPL	hydroperoxide lyase	http://www.genome.jp/dbget-bin/www_bget?ko:K10528	K4CF70	359	1.2e-32	Fatty acid hydroperoxide lyase, chloroplastic OS=Solanum lycopersicum OX=4081 GN=HPL PE=1 SV=1	--	--	--	--	--	--	--	--	--	--	UP	3.40047	2.47e-08	FALSE	1.86056	0.266653	UP	5.14681	1.97e-11	UP	3.26699	2.44e-07	UP	5.06633	3.92e-11
Cluster-11149.20373	4.12	12.52	13.27	4.75	1.42	2282	747084049	XP_011089416.1	577	2.1e-56	licodione synthase-like [Sesamum indicum]	KF606861.1	KF606861	178	3e-85	Plectranthus barbatus voucher RRLH:22176 clone 2L flavone synthase (FNS) mRNA, complete cds	-	-	-	http://www.genome.jp/dbget-bin/www_bget?ko:-	P93149	439	7.8e-42	Licodione synthase OS=Glycyrrhiza echinata OX=46348 GN=CYP93B1 PE=1 SV=2	PF00067	Cytochrome P450	GO:0055114	oxidation-reduction process	GO:0005506//GO:0020037//GO:0016705	iron ion binding//heme binding//oxidoreductase activity, acting on paired donors, with incorporation or reduction of molecular oxygen	--	--	--	--	UP	1.59848	0.00232868	FALSE	1.3472	0.0211957	UP	2.83477	1.64e-08	FALSE	0.469625	0.599513	UP	1.76644	0.000900052
Cluster-11149.33593	8.01	16.7	11.91	2.97	2.73	2534	848887022	XP_012843752.1	2503	1.1e-279	PREDICTED: cytochrome P450 86A8-like [Erythranthe guttata]	XM_011094280.2	XM_011094280	925	0	PREDICTED: Sesamum indicum cytochrome P450 86A8-like (LOC105172724), mRNA	K15398	CYP86A4S	fatty acid omega-hydroxylase	http://www.genome.jp/dbget-bin/www_bget?ko:K15398	O80823	2237	2.8e-250	Cytochrome P450 86A8 OS=Arabidopsis thaliana OX=3702 GN=CYP86A8 PE=2 SV=1	PF00067	Cytochrome P450	GO:0055114	oxidation-reduction process	GO:0016705//GO:0005506//GO:0020037	oxidoreductase activity, acting on paired donors, with incorporation or reduction of molecular oxygen//iron ion binding//heme binding	--	--	--	--	UP	2.69018	5.74e-08	FALSE	-0.273419	0.838017	UP	2.30589	2.11e-06	UP	2.10553	3.34e-05	UP	1.782	0.000384106
Cluster-11149.37945	25.43	8.65	10.89	6.7	1.65	1869	745790953	AJD25185.1	1725	1.3e-189	cytochrome P450 CYP76S7 [Salvia miltiorrhiza]	XM_011092786.2	XM_011092786	346	9.96e-179	PREDICTED: Sesamum indicum ferruginol synthase-like (LOC105171619), mRNA	-	-	-	http://www.genome.jp/dbget-bin/www_bget?ko:-	W8JMV1	1491	6.6e-164	Cytochrome P450 76T24 OS=Catharanthus roseus OX=4058 GN=CYP76T24 PE=2 SV=1	PF00067//PF07778	Cytochrome P450//Mis6	GO:0055114//GO:0034508	oxidation-reduction process//centromere complex assembly	GO:0016705//GO:0020037//GO:0005506	oxidoreductase activity, acting on paired donors, with incorporation or reduction of molecular oxygen//heme binding//iron ion binding	GO:0000776	kinetochore	--	--	FALSE	0.569938	0.466991	UP	1.62572	0.00398398	UP	2.08479	5.6e-05	UP	2.59791	1.19e-07	UP	4.17308	5.81e-16
Cluster-11149.12493	12.36	13.77	8.39	6.31	2.39	1887	747048170	XP_011070085.1	2090	6.1e-232	cytochrome P450 94A1 [Sesamum indicum]	XM_011071783.2	XM_011071783	754	0	PREDICTED: Sesamum indicum cytochrome P450 94A1 (LOC105155816), mRNA	-	-	-	http://www.genome.jp/dbget-bin/www_bget?ko:-	O81117	1013	1.8e-108	Cytochrome P450 94A1 OS=Vicia sativa OX=3908 GN=CYP94A1 PE=2 SV=2	PF00067	Cytochrome P450	GO:0055114	oxidation-reduction process	GO:0016705//GO:0005506//GO:0020037	oxidoreductase activity, acting on paired donors, with incorporation or reduction of molecular oxygen//iron ion binding//heme binding	--	--	--	--	FALSE	1.32679	0.0152769	FALSE	1.00335	0.105132	UP	2.21927	8.93e-06	UP	1.6429	0.00145506	UP	2.59593	1.88e-07
Cluster-11149.34845	2.85	5.72	6.44	3.62	1.22	4417	848909383	XP_012853479.1	1257	5.6e-135	PREDICTED: uncharacterized protein LOC105973031 [Erythranthe guttata]	XM_011080340.2	XM_011080340	373	0	PREDICTED: Sesamum indicum cytochrome P450 CYP736A12-like (LOC105162333), mRNA	K20562	CYP736A	biphenyl-4-hydroxylase	http://www.genome.jp/dbget-bin/www_bget?ko:K20562	A0A068Q5V6	816	2.9e-85	Cytochrome P450 71AU50 OS=Prunus mume OX=102107 GN=CYP71AU50 PE=2 SV=1	PF00067//PF12179//PF02536//PF08465	Cytochrome P450//I-kappa-kinase-beta NEMO binding domain//mTERF//Thymidine kinase from Herpesvirus C-terminal	GO:0009069//GO:0016310//GO:0006355//GO:0006230//GO:0055114//GO:0006206	serine family amino acid metabolic process//phosphorylation//regulation of transcription, DNA-templated//TMP biosynthetic process//oxidation-reduction process//pyrimidine nucleobase metabolic process	GO:0004797//GO:0003690//GO:0005506//GO:0005524//GO:0016705//GO:0008384//GO:0020037	thymidine kinase activity//double-stranded DNA binding//iron ion binding//ATP binding//oxidoreductase activity, acting on paired donors, with incorporation or reduction of molecular oxygen//IkappaB kinase activity//heme binding	GO:0008385	IkappaB kinase complex	--	--	FALSE	0.859332	0.166777	FALSE	1.1758	0.0391892	UP	1.9243	0.000104179	FALSE	0.329769	0.806498	FALSE	1.45537	0.00549287
Cluster-11149.8098	5	9.16	5.79	0.34	0	1875	848882554	XP_012841605.1	1873	8.9e-207	PREDICTED: alkane hydroxylase MAH1-like [Erythranthe guttata]	XM_020698209.1	XM_020698209	203	3.11e-99	PREDICTED: Sesamum indicum alkane hydroxylase MAH1-like (LOC105175175), mRNA	-	-	-	http://www.genome.jp/dbget-bin/www_bget?ko:-	Q9FVS9	1035	5e-111	Alkane hydroxylase MAH1 OS=Arabidopsis thaliana OX=3702 GN=CYP96A15 PE=2 SV=1	PF00067	Cytochrome P450	GO:0055114	oxidation-reduction process	GO:0016705//GO:0005506//GO:0020037	oxidoreductase activity, acting on paired donors, with incorporation or reduction of molecular oxygen//iron ion binding//heme binding	--	--	--	--	UP	4.94978	1.35e-16	FALSE	6.5195	0.00966091	UP	11.2721	7.79e-22	UP	4.54755	9.38e-14	UP	10.6918	2.44e-19
Cluster-11149.17341	5.44	15.39	5.73	0.06	0.03	1738	1276244053	PIN04526.1	1865	7e-206	Cytochrome P450 CYP4/CYP19/CYP26 subfamily [Handroanthus impetiginosus]	--	--	--	--	--	-	-	-	http://www.genome.jp/dbget-bin/www_bget?ko:-	A0A140IL90	1015	9.7e-109	Noroxomaritidine synthase OS=Narcissus aff. pseudonarcissus MK-2014 OX=1540222 GN=Cyp96T1 PE=1 SV=1	PF00067	Cytochrome P450	GO:0055114	oxidation-reduction process	GO:0020037//GO:0005506//GO:0016705	heme binding//iron ion binding//oxidoreductase activity, acting on paired donors, with incorporation or reduction of molecular oxygen	--	--	--	--	UP	8.19141	2.64e-27	FALSE	0.528852	1	UP	8.59642	8.41e-25	UP	7.15049	2e-20	UP	7.6017	4.85e-18
Cluster-11149.18283	4.13	4.29	4.17	1.62	0.47	2520	747047575	XP_011069763.1	839	9.4e-87	isoflavone 2'-hydroxylase-like [Sesamum indicum]	XM_021835945.1	XM_021835945	68	4.67e-24	PREDICTED: Hevea brasiliensis cytochrome P450 81E8-like (LOC110672985), mRNA	-	-	-	http://www.genome.jp/dbget-bin/www_bget?ko:-	W8JMU7	674	4.9e-69	Cytochrome P450 81Q32 OS=Catharanthus roseus OX=4058 GN=CYP81Q32 PE=2 SV=1	PF00067	Cytochrome P450	GO:0055114	oxidation-reduction process	GO:0016705//GO:0005506//GO:0020037	oxidoreductase activity, acting on paired donors, with incorporation or reduction of molecular oxygen//iron ion binding//heme binding	--	--	--	--	UP	1.60735	0.00398713	FALSE	1.37067	0.0520424	UP	2.86689	2.31e-07	UP	2.02883	0.000146107	UP	3.34824	1.68e-09
Cluster-11149.8307	0.27	0.26	4.09	1.3	0.53	412	848900832	XP_012850591.1	207	3e-14	PREDICTED: cytochrome P450 CYP72A219-like [Erythranthe guttata]	--	--	--	--	--	-	-	-	http://www.genome.jp/dbget-bin/www_bget?ko:-	Q2MJ19	179	2e-12	Cytochrome P450 72A68 OS=Medicago truncatula OX=3880 GN=CYP72A68 PE=1 SV=1	PF00067	Cytochrome P450	GO:0055114	oxidation-reduction process	GO:0005506//GO:0020037//GO:0016705	iron ion binding//heme binding//oxidoreductase activity, acting on paired donors, with incorporation or reduction of molecular oxygen	--	--	--	--	FALSE	-1.94162	0.565463	FALSE	0.863027	0.966504	FALSE	-1.16611	1	FALSE	-1.55399	0.745764	FALSE	-0.7303	1
Cluster-11149.44295	0.28	1	4.02	0.75	0.31	2054	747066655	XP_011080016.1	2045	1.1e-226	cytochrome P450 94A2 [Sesamum indicum]	XM_011081714.2	XM_011081714	547	0	PREDICTED: Sesamum indicum cytochrome P450 94A2 (LOC105163392), mRNA	-	-	-	http://www.genome.jp/dbget-bin/www_bget?ko:-	P98188	1638	6.6e-181	Cytochrome P450 94A2 OS=Vicia sativa OX=3908 GN=CYP94A2 PE=2 SV=1	PF00067	Cytochrome P450	GO:0055114	oxidation-reduction process	GO:0020037//GO:0005506//GO:0016705	heme binding//iron ion binding//oxidoreductase activity, acting on paired donors, with incorporation or reduction of molecular oxygen	--	--	--	--	FALSE	0.619317	0.571203	FALSE	0.86956	0.421688	FALSE	1.37788	0.0847093	FALSE	-0.731166	0.624755	FALSE	0.0882693	1
Cluster-11149.5523	2.8	2.32	3.65	2.74	1.82	1884	1173787055	XP_020548506.1	2143	4.4e-238	ent-kaurenoic acid oxidase 2-like [Sesamum indicum]	XM_020692847.1	XM_020692847	843	0	PREDICTED: Sesamum indicum ent-kaurenoic acid oxidase 2-like (LOC105157146), mRNA	-	-	-	http://www.genome.jp/dbget-bin/www_bget?ko:-	Q9C5Y2	770	2.7e-80	Ent-kaurenoic acid oxidase 2 OS=Arabidopsis thaliana OX=3702 GN=KAO2 PE=1 SV=2	PF00067	Cytochrome P450	GO:0055114	oxidation-reduction process	GO:0005506//GO:0020037//GO:0016705	iron ion binding//heme binding//oxidoreductase activity, acting on paired donors, with incorporation or reduction of molecular oxygen	--	--	--	--	FALSE	-0.0376966	1	FALSE	0.194466	0.959427	FALSE	0.0461434	1	FALSE	0.705442	0.355113	FALSE	0.849746	0.169928
Cluster-11149.11884	0.17	3	3.6	0.81	0.66	511	84514175	ABC59096.1	146	4.4e-07	cytochrome P450 monooxygenase CYP97C10 [Medicago truncatula]	--	--	--	--	--	K09837	LUT1, CYP97C1	carotene epsilon-monooxygenase	http://www.genome.jp/dbget-bin/www_bget?ko:K09837	--	--	--	--	--	--	--	--	--	--	--	--	--	--	FALSE	2.08215	0.0633157	FALSE	-0.0999557	1	FALSE	1.86903	0.110627	FALSE	-1.55399	0.745764	FALSE	-1.68433	0.618116
Cluster-11149.37113	0.93	0.39	3.53	0.19	0.05	1161	747087125	XP_011091093.1	201	4.2e-13	secologanin synthase-like [Sesamum indicum]	XM_011092791.2	XM_011092791	83	9.71e-33	PREDICTED: Sesamum indicum secologanin synthase-like (LOC105171626), mRNA	-	-	-	http://www.genome.jp/dbget-bin/www_bget?ko:-	Q9LUC6	135	7.1e-07	Cytochrome P450 72A14 OS=Arabidopsis thaliana OX=3702 GN=CYP72A14 PE=2 SV=1	PF00067	Cytochrome P450	GO:0055114	oxidation-reduction process	GO:0005506//GO:0020037//GO:0016705	iron ion binding//heme binding//oxidoreductase activity, acting on paired donors, with incorporation or reduction of molecular oxygen	--	--	--	--	FALSE	1.23588	0.651408	FALSE	1.47981	0.70386	FALSE	2.59812	0.198031	FALSE	2.95366	0.00623577	UP	4.35368	0.000933103
Cluster-11149.9184	2.88	3.27	3.47	2.03	0.35	1868	747075984	XP_011085047.1	1816	3.6e-200	cytochrome P450 71A21-like [Sesamum indicum]	XM_023019172.1	XM_023019172	469	0	PREDICTED: Olea europaea var. sylvestris cytochrome P450 71A4-like (LOC111393574), mRNA	-	-	-	http://www.genome.jp/dbget-bin/www_bget?ko:-	A0A068Q6L2	1241	6.5e-135	Cytochrome P450 736A117 OS=Prunus mume OX=102107 GN=CYP736A117 PE=2 SV=1	PF05792//PF00067	Candida agglutinin-like (ALS)//Cytochrome P450	GO:0007155//GO:0055114	cell adhesion//oxidation-reduction process	GO:0005506//GO:0020037//GO:0016705	iron ion binding//heme binding//oxidoreductase activity, acting on paired donors, with incorporation or reduction of molecular oxygen	--	--	--	--	FALSE	0.884243	0.219298	UP	2.15116	0.00242661	UP	2.92406	2.82e-06	FALSE	1.17366	0.0627081	UP	3.27229	1.71e-07
Cluster-11149.7590	1.81	1.57	3.14	2.4	0.13	1937	747056349	XP_011074435.1	2063	8.5e-229	abscisic acid 8'-hydroxylase 4-like [Sesamum indicum]	XM_011076133.2	XM_011076133	792	0	PREDICTED: Sesamum indicum abscisic acid 8'-hydroxylase 4-like (LOC105159170), mRNA	K09843	E1.14.13.93	(+)-abscisic acid 8'-hydroxylase	http://www.genome.jp/dbget-bin/www_bget?ko:K09843	A9QNE7	1759	5.8e-195	Abscisic acid 8'-hydroxylase CYP707A1 OS=Solanum lycopersicum OX=4081 GN=CYP707A1 PE=2 SV=1	PF00067	Cytochrome P450	GO:0055114	oxidation-reduction process	GO:0005506//GO:0020037//GO:0016705	iron ion binding//heme binding//oxidoreductase activity, acting on paired donors, with incorporation or reduction of molecular oxygen	--	--	--	--	FALSE	-0.413481	0.749853	UP	3.81006	5.7e-07	UP	3.28441	2.56e-05	FALSE	0.263861	0.910891	UP	4.01684	3.54e-08
Cluster-11149.13406	1.77	3.98	2.27	1.29	0.95	613	1276232594	PIM97508.1	397	4.1e-36	Cytochrome P450 CYP4/CYP19/CYP26 subfamily [Handroanthus impetiginosus]	--	--	--	--	--	-	-	-	http://www.genome.jp/dbget-bin/www_bget?ko:-	Q2MJ21	256	3.5e-21	Cytochrome P450 716A67 OS=Medicago truncatula OX=3880 GN=CYP72A67 PE=2 SV=1	PF03393	Pneumovirus matrix protein	GO:0019068	virion assembly	--	--	GO:0019031	viral envelope	--	--	FALSE	1.83346	0.0341868	FALSE	0.0369179	1	FALSE	1.75855	0.0388274	FALSE	1.11333	0.332607	FALSE	1.09871	0.317297
Cluster-11149.37645	0.24	0.66	1.31	0.4	0	786	1276238004	PIN00373.1	1079	4.3e-115	Cytochrome P450 CYP4/CYP19/CYP26 subfamily [Handroanthus impetiginosus]	XM_011097402.2	XM_011097402	249	3.41e-125	PREDICTED: Sesamum indicum alkane hydroxylase MAH1 (LOC105175078), mRNA	-	-	-	http://www.genome.jp/dbget-bin/www_bget?ko:-	Q9FVS9	458	1.7e-44	Alkane hydroxylase MAH1 OS=Arabidopsis thaliana OX=3702 GN=CYP96A15 PE=2 SV=1	PF00067	Cytochrome P450	GO:0055114	oxidation-reduction process	GO:0020037//GO:0005506//GO:0016705	heme binding//iron ion binding//oxidoreductase activity, acting on paired donors, with incorporation or reduction of molecular oxygen	--	--	--	--	FALSE	0.923494	0.651408	FALSE	5.16593	0.357601	FALSE	5.89507	0.062744	FALSE	-0.0559244	1	FALSE	4.7457	0.44892
Cluster-11149.10746	18.28	22.25	163.01	0	0.32	385	747093273	XP_011094434.1	304	1.6e-25	cytochrome P450 76A1-like [Sesamum indicum]	--	--	--	--	--	K20618	CYP76A	cytochrome P450 family 76 subfamily A	http://www.genome.jp/dbget-bin/www_bget?ko:K20618	W8JIS5	267	1.2e-22	Iridoid oxidase OS=Catharanthus roseus OX=4058 GN=IO PE=1 SV=1	PF00067	Cytochrome P450	GO:0055114	oxidation-reduction process	GO:0005506//GO:0020037//GO:0016705	iron ion binding//heme binding//oxidoreductase activity, acting on paired donors, with incorporation or reduction of molecular oxygen	--	--	--	--	UP	9.29003	3e-11	FALSE	-3.3742	1	UP	5.72619	2.46e-09	UP	9.21458	1.61e-10	UP	5.85922	6.94e-09
Cluster-11149.27122	66.45	100.63	139.32	97.21	181.1	1967	1491760374	AYK02607.1	2568	2.4e-287	coumarate 3-hydroxylase [Catalpa fargesii]	NM_001304410.1	AY065995	822	0	Sesamum indicum cytochrome P450 98A3 (LOC105162700), mRNA >gb|AY065995.1| Sesamum indicum p-coumarate 3-hydroxylase mRNA, complete cds	-	-	-	http://www.genome.jp/dbget-bin/www_bget?ko:-	O48922	1934	3e-215	Cytochrome P450 98A2 OS=Glycine max OX=3847 GN=CYP98A2 PE=2 SV=1	PF00067	Cytochrome P450	GO:0055114	oxidation-reduction process	GO:0016705//GO:0020037//GO:0005506	oxidoreductase activity, acting on paired donors, with incorporation or reduction of molecular oxygen//heme binding//iron ion binding	--	--	--	--	FALSE	0.25182	0.869797	FALSE	-1.29401	0.0127901	FALSE	-1.15297	0.0192563	FALSE	0.125731	1	FALSE	-1.21827	0.0137893
Cluster-11149.20349	53.96	22.59	102.37	0.01	0.07	3380	1276256288	PIN14011.1	987	8.7e-104	Cytochrome P450 CYP2 subfamily [Handroanthus impetiginosus]	KP337708.1	KP337708	140	5.94e-64	Salvia miltiorrhiza cytochrome P450 CYP82U4 mRNA, complete cds	K17961	CYP82G1	cytochrome P450 family 82 subfamily G polypeptide 1	http://www.genome.jp/dbget-bin/www_bget?ko:K17961	Q9LSF8	670	1.9e-68	Dimethylnonatriene synthase OS=Arabidopsis thaliana OX=3702 GN=CYP82G1 PE=1 SV=1	PF00067	Cytochrome P450	GO:0055114	oxidation-reduction process	GO:0016705//GO:0005506//GO:0020037	oxidoreductase activity, acting on paired donors, with incorporation or reduction of molecular oxygen//iron ion binding//heme binding	--	--	--	--	UP	10.7288	5.57e-40	FALSE	-2.58389	0.370591	UP	8.02361	8.87e-33	UP	12.4386	4.98e-51	UP	9.81041	3.84e-45
Cluster-11149.22807	20.13	36.52	72.88	42.05	53.42	4198	922074201	ALA55539.1	1264	8.2e-136	cinnamate 4-hydroxylase [Sesamum indicum]	XM_011082349.2	XM_011082349	537	0	PREDICTED: Sesamum indicum trans-cinnamate 4-monooxygenase-like (LOC105163854), mRNA	K00487	CYP73A	trans-cinnamate 4-monooxygenase	http://www.genome.jp/dbget-bin/www_bget?ko:K00487	P48522	1238	3.2e-134	Trans-cinnamate 4-monooxygenase OS=Catharanthus roseus OX=4058 GN=CYP73A4 PE=2 SV=1	PF00067	Cytochrome P450	GO:0055114	oxidation-reduction process	GO:0005506//GO:0020037//GO:0016705	iron ion binding//heme binding//oxidoreductase activity, acting on paired donors, with incorporation or reduction of molecular oxygen	--	--	--	--	FALSE	-0.00398976	1	FALSE	-0.740891	0.231375	FALSE	-0.855659	0.101513	FALSE	-0.386569	0.692198	FALSE	-1.17746	0.0179841
Cluster-11149.24150	8.29	21.2	40.9	27.67	50.06	3561	1276248475	PIN07818.1	1459	1.7e-158	Cytochrome P450 CYP2 subfamily [Handroanthus impetiginosus]	XM_011091230.2	XM_011091230	577	0	PREDICTED: Sesamum indicum trans-cinnamate 4-monooxygenase (LOC105170468), mRNA	K00487	CYP73A	trans-cinnamate 4-monooxygenase	http://www.genome.jp/dbget-bin/www_bget?ko:K00487	P48522	1409	4.1e-154	Trans-cinnamate 4-monooxygenase OS=Catharanthus roseus OX=4058 GN=CYP73A4 PE=2 SV=1	PF00067//PF04277	Cytochrome P450//Oxaloacetate decarboxylase, gamma chain	GO:0036376//GO:0006560//GO:0006525//GO:0055114//GO:0006090//GO:0006814	sodium ion export across plasma membrane//proline metabolic process//arginine metabolic process//oxidation-reduction process//pyruvate metabolic process//sodium ion transport	GO:0020037//GO:0016705//GO:0015081//GO:0005506//GO:0008948	heme binding//oxidoreductase activity, acting on paired donors, with incorporation or reduction of molecular oxygen//sodium ion transmembrane transporter activity//iron ion binding//oxaloacetate decarboxylase activity	GO:0016020	membrane	--	--	FALSE	-0.184371	0.977367	FALSE	-1.251	0.0168148	DOWN	-1.54614	0.00122803	FALSE	-1.06317	0.0568949	DOWN	-2.36413	5.65e-07
Cluster-11149.29873	24.33	42.7	35.57	45.55	18.98	2228	307159064	ADN39418.1	2210	8.8e-246	obtusifoliol-14-demethylase [Withania somnifera]	XM_011090258.2	XM_011090258	885	0	PREDICTED: Sesamum indicum sterol 14-demethylase-like (LOC105169754), mRNA	K05917	CYP51	sterol 14-demethylase	http://www.genome.jp/dbget-bin/www_bget?ko:K05917	Q9SAA9	2073	2.6e-231	Sterol 14-demethylase OS=Arabidopsis thaliana OX=3702 GN=CYP51G1 PE=1 SV=1	PF00067	Cytochrome P450	GO:0055114	oxidation-reduction process	GO:0016705//GO:0005506//GO:0020037	oxidoreductase activity, acting on paired donors, with incorporation or reduction of molecular oxygen//iron ion binding//heme binding	--	--	KOG0684	Cytochrome P450	FALSE	0.107919	1	FALSE	0.866805	0.1403	FALSE	0.863942	0.101177	FALSE	-0.229783	0.885387	FALSE	0.587001	0.30995
Cluster-11149.31146	33.03	12.49	34.99	42.63	51.04	2552	747056420	XP_011074474.1	2173	2e-241	allene oxide synthase 1, chloroplastic [Sesamum indicum]	XM_012990097.1	XM_012990097	588	0	PREDICTED: Erythranthe guttatus allene oxide synthase-like (LOC105965535), mRNA	K01723	AOS	hydroperoxide dehydratase	http://www.genome.jp/dbget-bin/www_bget?ko:K01723	K4BV52	1856	4.3e-206	Allene oxide synthase 1, chloroplastic OS=Solanum lycopersicum OX=4081 GN=AOS1 PE=2 SV=1	PF00067	Cytochrome P450	GO:0055114	oxidation-reduction process	GO:0020037//GO:0005506//GO:0016705	heme binding//iron ion binding//oxidoreductase activity, acting on paired donors, with incorporation or reduction of molecular oxygen	--	--	--	--	DOWN	-1.57008	0.00210808	FALSE	-0.655787	0.321654	DOWN	-2.33661	7.11e-07	FALSE	0.307124	0.806498	FALSE	-0.398664	0.54313
Cluster-11149.24647	30.11	31.8	34.25	50.24	51.04	1849	1276346483	BBB04707.1	2344	2.1e-261	cytochrome P450 [Perilla frutescens]	XM_011093564.2	XM_011093564	866	0	PREDICTED: Sesamum indicum cytochrome P450 98A2 (LOC105172202), mRNA	K09754	CYP98A, C3'H	coumaroylquinate(coumaroylshikimate) 3'-monooxygenase	http://www.genome.jp/dbget-bin/www_bget?ko:K09754	O48922	2184	2.9e-244	Cytochrome P450 98A2 OS=Glycine max OX=3847 GN=CYP98A2 PE=2 SV=1	PF00067	Cytochrome P450	GO:0055114	oxidation-reduction process	GO:0016705//GO:0020037//GO:0005506	oxidoreductase activity, acting on paired donors, with incorporation or reduction of molecular oxygen//heme binding//iron ion binding	--	--	--	--	FALSE	-0.457192	0.576666	FALSE	-0.419307	0.611908	FALSE	-0.987265	0.0517006	FALSE	-0.0645109	1	FALSE	-0.533814	0.373462
Cluster-11149.27567	50.53	80.37	33.93	64.61	113.7	1493	604305966	EYU25023.1	1568	1.6e-171	hypothetical protein MIMGU_mgv1a004800mg [Erythranthe guttata]	XM_012996686.1	XM_012996686	639	0	PREDICTED: Erythranthe guttatus cytochrome P450 704C1-like (LOC105971795), mRNA	-	-	-	http://www.genome.jp/dbget-bin/www_bget?ko:-	Q50EK3	916	2.5e-97	Cytochrome P450 704C1 OS=Pinus taeda OX=3352 GN=CYP704C1 PE=2 SV=1	PF00067	Cytochrome P450	GO:0055114	oxidation-reduction process	GO:0005506//GO:0020037//GO:0016705	iron ion binding//heme binding//oxidoreductase activity, acting on paired donors, with incorporation or reduction of molecular oxygen	--	--	--	--	FALSE	0.518486	0.512337	FALSE	-1.21216	0.0220223	FALSE	-0.804452	0.126299	FALSE	0.318385	0.806498	FALSE	-0.94377	0.0654028
Cluster-11149.29334	24.47	30.23	30.16	14.29	15.97	3003	1276234947	PIM98576.1	2090	9.8e-232	Cytochrome P450 CYP4/CYP19/CYP26 subfamily [Handroanthus impetiginosus]	XM_012988874.1	XM_012988874	670	0	PREDICTED: Erythranthe guttatus cytochrome P450 CYP72A219-like (LOC105964346), mRNA	-	-	-	http://www.genome.jp/dbget-bin/www_bget?ko:-	H2DH21	1615	4.5e-178	Cytochrome P450 CYP72A219 OS=Panax ginseng OX=4054 PE=2 SV=1	PF00067	Cytochrome P450	GO:0055114	oxidation-reduction process	GO:0005506//GO:0020037//GO:0016705	iron ion binding//heme binding//oxidoreductase activity, acting on paired donors, with incorporation or reduction of molecular oxygen	--	--	--	--	FALSE	1.28127	0.0164779	FALSE	-0.556596	0.430087	FALSE	0.613885	0.273747	UP	1.45216	0.00463408	FALSE	0.845548	0.108227
Cluster-11149.36890	10.4	19.93	26.26	0	0	404	747051778	XP_011071981.1	413	3.8e-38	cytochrome P450 71A8-like [Sesamum indicum]	--	--	--	--	--	K07418	CYP2J	cytochrome P450 family 2 subfamily J	http://www.genome.jp/dbget-bin/www_bget?ko:K07418	Q42716	385	2.5e-36	Cytochrome P450 71A8 OS=Mentha piperita OX=34256 GN=CYP71A8 PE=3 SV=1	PF00067	Cytochrome P450	GO:0055114	oxidation-reduction process	GO:0005506//GO:0020037//GO:0016705	iron ion binding//heme binding//oxidoreductase activity, acting on paired donors, with incorporation or reduction of molecular oxygen	--	--	--	--	UP	9.31018	2.44e-11	FALSE	0	1	UP	9.04328	1.47e-10	UP	8.59245	9.19e-08	UP	8.31991	2.3e-07
Cluster-11149.13323	14.92	19.97	24.97	41.23	7.59	1703	747051776	XP_011071980.1	1781	3.7e-196	cytochrome P450 71A6-like [Sesamum indicum]	XM_011073880.2	XM_011073880	485	0	PREDICTED: Sesamum indicum cytochrome P450 71A6-like (LOC105157475), mRNA	-	-	-	http://www.genome.jp/dbget-bin/www_bget?ko:-	O04164	1545	3.3e-170	Cytochrome P450 71A6 (Fragment) OS=Nepeta racemosa OX=54731 GN=CYP71A6 PE=2 SV=1	PF00067	Cytochrome P450	GO:0055114	oxidation-reduction process	GO:0016705//GO:0020037//GO:0005506	oxidoreductase activity, acting on paired donors, with incorporation or reduction of molecular oxygen//heme binding//iron ion binding	--	--	--	--	FALSE	-0.842855	0.16775	UP	2.04479	3.76e-05	FALSE	1.09116	0.0344263	FALSE	-0.792127	0.202861	FALSE	1.20257	0.0194097
Cluster-11149.9961	13.36	13.49	24.48	0.09	0.19	699	747051778	XP_011071981.1	449	4.4e-42	cytochrome P450 71A8-like [Sesamum indicum]	KU705476.1	KU705476	66	1.62e-23	Erythranthe lutea chloroplast, complete genome	K07418	CYP2J	cytochrome P450 family 2 subfamily J	http://www.genome.jp/dbget-bin/www_bget?ko:K07418	A0A068Q6L2	322	8.8e-29	Cytochrome P450 736A117 OS=Prunus mume OX=102107 GN=CYP736A117 PE=2 SV=1	PF00917//PF00067	MATH domain//Cytochrome P450	GO:0055114	oxidation-reduction process	GO:0020037//GO:0005506//GO:0016705//GO:0005515	heme binding//iron ion binding//oxidoreductase activity, acting on paired donors, with incorporation or reduction of molecular oxygen//protein binding	--	--	--	--	UP	7.18915	2.16e-16	FALSE	-1.3065	1	UP	5.75895	2.29e-12	UP	7.60304	1.25e-17	UP	6.24165	1.78e-14
Cluster-11149.39890	133.33	8.74	23.09	167.74	160.58	1323	1035959117	OAY80252.1	331	4e-28	Abscisic acid 8'-hydroxylase 1, partial [Ananas comosus]	JQ838175.1	JQ838175	119	1.08e-52	Orobanche ramosa ABA 8'-hydroxylase CYP707A2 (CYP707A2) mRNA, complete cds	K09843	E1.14.13.93	(+)-abscisic acid 8'-hydroxylase	http://www.genome.jp/dbget-bin/www_bget?ko:K09843	K4CI52	230	7.8e-18	Abscisic acid 8'-hydroxylase CYP707A2 OS=Solanum lycopersicum OX=4081 GN=CYP707A2 PE=2 SV=1	PF00067	Cytochrome P450	GO:0055114	oxidation-reduction process	GO:0020037//GO:0005506//GO:0016705	heme binding//iron ion binding//oxidoreductase activity, acting on paired donors, with incorporation or reduction of molecular oxygen	--	--	--	--	DOWN	-4.05736	4.67e-16	FALSE	-0.334116	0.727156	DOWN	-4.5021	3e-19	FALSE	0.340975	0.758992	FALSE	-0.0431479	1
Cluster-11149.31366	22.4	12.99	23.03	7.77	10.25	2080	747076117	XP_011085115.1	2137	2.4e-237	cytochrome P450 89A2 [Sesamum indicum]	XM_011086813.2	XM_011086813	410	0	PREDICTED: Sesamum indicum cytochrome P450 89A2 (LOC105167189), mRNA	-	-	-	http://www.genome.jp/dbget-bin/www_bget?ko:-	Q42602	1465	7.6e-161	Cytochrome P450 89A2 OS=Arabidopsis thaliana OX=3702 GN=CYP89A2 PE=2 SV=2	PF00067	Cytochrome P450	GO:0055114	oxidation-reduction process	GO:0020037//GO:0005506//GO:0016705	heme binding//iron ion binding//oxidoreductase activity, acting on paired donors, with incorporation or reduction of molecular oxygen	--	--	--	--	FALSE	0.94384	0.117643	FALSE	-0.795968	0.201793	FALSE	0.0370994	1	UP	2.20252	7.65e-06	FALSE	1.35653	0.0063035
Cluster-11149.33242	128.67	7.21	21.96	155.15	158.71	1215	1276270806	PIN26284.1	978	3.5e-103	Cytochrome P450 CYP4/CYP19/CYP26 subfamily [Handroanthus impetiginosus]	JQ838175.1	JQ838175	197	4.32e-96	Orobanche ramosa ABA 8'-hydroxylase CYP707A2 (CYP707A2) mRNA, complete cds	K09843	E1.14.13.93	(+)-abscisic acid 8'-hydroxylase	http://www.genome.jp/dbget-bin/www_bget?ko:K09843	Q949P1	897	3.2e-95	Abscisic acid 8'-hydroxylase 1 OS=Arabidopsis thaliana OX=3702 GN=CYP707A1 PE=1 SV=1	PF00067	Cytochrome P450	GO:0055114	oxidation-reduction process	GO:0016705//GO:0020037//GO:0005506	oxidoreductase activity, acting on paired donors, with incorporation or reduction of molecular oxygen//heme binding//iron ion binding	--	--	--	--	DOWN	-4.22157	6.35e-17	FALSE	-0.430029	0.590787	DOWN	-4.76218	8.88e-21	FALSE	0.401629	0.661573	FALSE	-0.0784048	1
Cluster-11149.25814	10.34	17.94	21.88	37.3	3.16	427	747052148	XP_011072182.1	374	1.3e-33	cytochrome P450 71A6-like [Sesamum indicum]	XM_028267107.1	XM_028267107	44	1.62e-11	PREDICTED: Camellia sinensis cytochrome P450 71A6-like (LOC114320017), mRNA	K07408	CYP1A1	cytochrome P450 family 1 subfamily A polypeptide 1	http://www.genome.jp/dbget-bin/www_bget?ko:K07408	O04164	354	1.1e-32	Cytochrome P450 71A6 (Fragment) OS=Nepeta racemosa OX=54731 GN=CYP71A6 PE=2 SV=1	PF00067	Cytochrome P450	GO:0055114	oxidation-reduction process	GO:0016705//GO:0005506//GO:0020037	oxidoreductase activity, acting on paired donors, with incorporation or reduction of molecular oxygen//iron ion binding//heme binding	--	--	--	--	FALSE	-0.811087	0.254105	UP	3.14984	4.82e-07	UP	2.22764	0.000904857	FALSE	-1.20066	0.0694981	FALSE	1.89697	0.00984351
Cluster-11149.34796	36.47	26.72	20.46	64.05	38.63	2196	747079976	XP_011087220.1	2062	1.3e-228	cytochrome P450 94A2-like [Sesamum indicum]	XM_011088918.2	XM_011088918	653	0	PREDICTED: Sesamum indicum cytochrome P450 94A2-like (LOC105168773), mRNA	-	-	-	http://www.genome.jp/dbget-bin/www_bget?ko:-	P98188	1569	7e-173	Cytochrome P450 94A2 OS=Vicia sativa OX=3908 GN=CYP94A2 PE=2 SV=1	PF00067	Cytochrome P450	GO:0055114	oxidation-reduction process	GO:0016705//GO:0020037//GO:0005506	oxidoreductase activity, acting on paired donors, with incorporation or reduction of molecular oxygen//heme binding//iron ion binding	--	--	--	--	FALSE	-1.05965	0.0603922	FALSE	0.333265	0.730536	FALSE	-0.837145	0.109054	FALSE	-0.137601	1	FALSE	0.145655	0.924239
Cluster-11149.31187	7.82	11.89	20.13	0	0.09	1750	747084188	XP_011089493.1	1901	4.7e-210	abscisic acid 8'-hydroxylase 2 isoform X1 [Sesamum indicum]	XM_011091191.2	XM_011091191	687	0	PREDICTED: Sesamum indicum abscisic acid 8'-hydroxylase 2 (LOC105170431), transcript variant X1, mRNA	K09843	E1.14.13.93	(+)-abscisic acid 8'-hydroxylase	http://www.genome.jp/dbget-bin/www_bget?ko:K09843	O81077	1528	3.2e-168	Abscisic acid 8'-hydroxylase 2 OS=Arabidopsis thaliana OX=3702 GN=CYP707A2 PE=2 SV=1	PF00067	Cytochrome P450	GO:0055114	oxidation-reduction process	GO:0016705//GO:0005506//GO:0020037	oxidoreductase activity, acting on paired donors, with incorporation or reduction of molecular oxygen//iron ion binding//heme binding	--	--	--	--	UP	11.8002	3.37e-26	FALSE	-4.86329	0.540202	UP	6.75231	7.76e-21	UP	11.4935	7.55e-24	UP	6.67104	2.43e-20
Cluster-11149.14712	25.53	24.97	19.68	11.14	10.39	570	1276234947	PIM98576.1	473	5.9e-45	Cytochrome P450 CYP4/CYP19/CYP26 subfamily [Handroanthus impetiginosus]	XM_011084666.2	XM_011084666	141	2.65e-65	PREDICTED: Sesamum indicum cytochrome P450 CYP72A219-like (LOC105165603), mRNA	-	-	-	http://www.genome.jp/dbget-bin/www_bget?ko:-	W8JWW3	338	1e-30	Cytochrome P450 72A225 OS=Catharanthus roseus OX=4058 GN=CYP72A225 PE=2 SV=1	PF00067	Cytochrome P450	GO:0055114	oxidation-reduction process	GO:0020037//GO:0005506//GO:0016705	heme binding//iron ion binding//oxidoreductase activity, acting on paired donors, with incorporation or reduction of molecular oxygen	--	--	--	--	FALSE	1.38619	0.0173816	FALSE	-0.299	0.830345	FALSE	0.976348	0.0919505	UP	1.85525	0.000589808	UP	1.50607	0.00479167
Cluster-11149.22930	7.13	14.21	19.14	27.47	15.18	1812	747047557	XP_011069755.1	1877	2.9e-207	isoflavone 3'-hydroxylase-like [Sesamum indicum]	XM_019234188.1	XM_019234188	42	9.49e-10	PREDICTED: Camelina sativa cytochrome P450 81D11-like (LOC104729436), mRNA	-	-	-	http://www.genome.jp/dbget-bin/www_bget?ko:-	W8JMU7	1298	1.5e-141	Cytochrome P450 81Q32 OS=Catharanthus roseus OX=4058 GN=CYP81Q32 PE=2 SV=1	PF00067//PF00233	Cytochrome P450//3'5'-cyclic nucleotide phosphodiesterase	GO:0006144//GO:0055114//GO:0007165	purine nucleobase metabolic process//oxidation-reduction process//signal transduction	GO:0020037//GO:0004114//GO:0005506//GO:0016705	heme binding//3',5'-cyclic-nucleotide phosphodiesterase activity//iron ion binding//oxidoreductase activity, acting on paired donors, with incorporation or reduction of molecular oxygen	--	--	--	--	FALSE	-0.748782	0.246838	FALSE	0.459471	0.554583	FALSE	-0.400056	0.545233	FALSE	-1.27159	0.018266	FALSE	-0.862075	0.111866
Cluster-11149.32581	10.18	12.24	16.24	1.28	4.19	2365	1276268317	PIN24137.1	2082	6.5e-231	Cytochrome P450 CYP4/CYP19/CYP26 subfamily [Handroanthus impetiginosus]	XM_011101300.2	XM_011101300	495	0	PREDICTED: Sesamum indicum cytochrome P450 90B1 (LOC105177981), mRNA	K09587	CYP90B1, DWF4	steroid 22-alpha-hydroxylase	http://www.genome.jp/dbget-bin/www_bget?ko:K09587	O64989	1703	2.2e-188	Cytochrome P450 90B1 OS=Arabidopsis thaliana OX=3702 GN=CYP90B1 PE=1 SV=2	PF17333//PF00067	Beta defensin 136//Cytochrome P450	GO:0042742//GO:0055114	defense response to bacterium//oxidation-reduction process	GO:0016705//GO:0020037//GO:0005506	oxidoreductase activity, acting on paired donors, with incorporation or reduction of molecular oxygen//heme binding//iron ion binding	--	--	--	--	UP	3.46079	2.35e-11	DOWN	-2.10867	8.45e-05	FALSE	1.24119	0.0146451	UP	3.66761	1.67e-12	UP	1.50904	0.00270462
Cluster-11149.17526	14	14.05	15.73	1.26	1.63	1914	747051776	XP_011071980.1	887	1.9e-92	cytochrome P450 71A6-like [Sesamum indicum]	XM_011073678.2	XM_011073678	324	1.73e-166	PREDICTED: Sesamum indicum cytochrome P450 71A6-like (LOC105157298), mRNA	-	-	-	http://www.genome.jp/dbget-bin/www_bget?ko:-	O04164	768	4.7e-80	Cytochrome P450 71A6 (Fragment) OS=Nepeta racemosa OX=54731 GN=CYP71A6 PE=2 SV=1	PF00067	Cytochrome P450	GO:0055114	oxidation-reduction process	GO:0016705//GO:0020037//GO:0005506	oxidoreductase activity, acting on paired donors, with incorporation or reduction of molecular oxygen//heme binding//iron ion binding	--	--	--	--	UP	3.67704	2.98e-12	FALSE	-0.767951	0.357601	UP	2.79802	3.06e-08	UP	4.14356	6.39e-15	UP	3.32534	5.86e-11
Cluster-11149.29550	18.27	3.37	15.7	5.26	5.36	1950	747068816	XP_011081185.1	1911	3.6e-211	flavonoid 3'-monooxygenase-like [Sesamum indicum]	XM_011082883.2	XM_011082883	519	0	PREDICTED: Sesamum indicum flavonoid 3'-monooxygenase-like (LOC105164270), mRNA	-	-	-	http://www.genome.jp/dbget-bin/www_bget?ko:-	A0A4D6Q415	892	2e-94	Flavonoid 3'-monooxygenase CYP75B137 OS=Crocosmia x crocosmiiflora OX=1053288 GN=CYP75B137 PE=1 SV=1	PF00067	Cytochrome P450	GO:0055114	oxidation-reduction process	GO:0020037//GO:0005506//GO:0016705	heme binding//iron ion binding//oxidoreductase activity, acting on paired donors, with incorporation or reduction of molecular oxygen	--	--	--	--	FALSE	-0.44131	0.653551	FALSE	-0.4244	0.642864	FALSE	-0.976329	0.0772434	UP	2.47014	5.8e-07	UP	1.99566	4.15e-05
Cluster-11149.22919	9.14	13.57	15.5	1.71	3.55	2512	1173788644	XP_011076685.2	1717	1.5e-188	cytochrome P450 90A1 [Sesamum indicum]	XM_011078383.2	XM_011078383	821	0	PREDICTED: Sesamum indicum cytochrome P450 90A1 (LOC105160880), mRNA	K09588	CYP90A1, CPD	cytochrome P450 family 90 subfamily A polypeptide 1	http://www.genome.jp/dbget-bin/www_bget?ko:K09588	Q42569	1470	2.4e-161	Cytochrome P450 90A1 OS=Arabidopsis thaliana OX=3702 GN=CYP90A1 PE=2 SV=1	PF00067	Cytochrome P450	GO:0055114	oxidation-reduction process	GO:0016705//GO:0005506//GO:0020037	oxidoreductase activity, acting on paired donors, with incorporation or reduction of molecular oxygen//iron ion binding//heme binding	--	--	--	--	UP	3.18346	3.11e-10	FALSE	-1.44656	0.0107557	UP	1.62601	0.000990608	UP	3.08729	1.19e-09	UP	1.59073	0.00153695
Cluster-11149.15178	46.59	11.02	14.86	60.89	88.21	409	848914554	XP_012855179.1	569	3.1e-56	PREDICTED: uncharacterized protein LOC105974611 [Erythranthe guttata]	XM_012999725.1	XM_012999725	179	1.39e-86	PREDICTED: Erythranthe guttatus uncharacterized LOC105974611 (LOC105974611), mRNA	-	-	-	http://www.genome.jp/dbget-bin/www_bget?ko:-	H2DH17	401	3.6e-38	Cytochrome P450 CYP749A22 OS=Panax ginseng OX=4054 PE=2 SV=1	PF00067	Cytochrome P450	GO:0055114	oxidation-reduction process	GO:0016705//GO:0020037//GO:0005506	oxidoreductase activity, acting on paired donors, with incorporation or reduction of molecular oxygen//heme binding//iron ion binding	--	--	--	--	DOWN	-2.21419	6.2e-05	FALSE	-0.936516	0.117737	DOWN	-3.26075	5.81e-10	FALSE	0.258494	0.873031	FALSE	-0.727914	0.207657
Cluster-11149.26581	17.53	30.24	13.45	26.82	49.56	1078	747059808	XP_011076303.1	414	7.7e-38	cytochrome P450 704C1 [Sesamum indicum]	--	--	--	--	--	-	-	-	http://www.genome.jp/dbget-bin/www_bget?ko:-	Q50EK3	194	9.5e-14	Cytochrome P450 704C1 OS=Pinus taeda OX=3352 GN=CYP704C1 PE=2 SV=1	PF06667	Phage shock protein B	GO:0009271//GO:0006355	phage shock//regulation of transcription, DNA-templated	--	--	--	--	--	--	FALSE	0.379377	0.718069	FALSE	-1.28306	0.0154601	FALSE	-1.01444	0.0463528	FALSE	0.056723	1	FALSE	-1.27627	0.0110368
Cluster-11149.27297	32.9	16.94	13.04	41.68	77.12	1473	604303052	EYU22577.1	592	2.4e-58	hypothetical protein MIMGU_mgv1a004830mg [Erythranthe guttata]	XM_024018324.1	XM_024018324	69	7.52e-25	PREDICTED: Quercus suber cytochrome P450 CYP749A22-like (LOC111986640), mRNA	-	-	-	http://www.genome.jp/dbget-bin/www_bget?ko:-	H2DH17	440	3.9e-42	Cytochrome P450 CYP749A22 OS=Panax ginseng OX=4054 PE=2 SV=1	PF00067	Cytochrome P450	GO:0055114	oxidation-reduction process	GO:0016705//GO:0020037//GO:0005506	oxidoreductase activity, acting on paired donors, with incorporation or reduction of molecular oxygen//heme binding//iron ion binding	--	--	--	--	FALSE	-1.09533	0.0529897	FALSE	-1.28456	0.0142286	DOWN	-2.49062	1.41e-07	FALSE	0.33155	0.786042	FALSE	-1.00299	0.0497173
Cluster-11149.22488	19.89	32.63	12.22	22.28	41.48	1633	604305966	EYU25023.1	297	4.3e-24	hypothetical protein MIMGU_mgv1a004800mg [Erythranthe guttata]	XM_011078001.2	XM_011078001	128	1.33e-57	PREDICTED: Sesamum indicum cytochrome P450 704C1 (LOC105160566), mRNA	-	-	-	http://www.genome.jp/dbget-bin/www_bget?ko:-	Q50EK3	150	1.8e-08	Cytochrome P450 704C1 OS=Pinus taeda OX=3352 GN=CYP704C1 PE=2 SV=1	PF00067	Cytochrome P450	GO:0055114	oxidation-reduction process	GO:0005506//GO:0020037//GO:0016705	iron ion binding//heme binding//oxidoreductase activity, acting on paired donors, with incorporation or reduction of molecular oxygen	--	--	--	--	FALSE	0.753154	0.244997	FALSE	-1.29303	0.0140732	FALSE	-0.650645	0.246559	FALSE	0.509398	0.515293	FALSE	-0.833602	0.116995
Cluster-11149.29303	12.79	20.55	11.78	46.49	58.59	679	848919382	XP_012856766.1	665	3.8e-67	PREDICTED: flavonoid 3'-monooxygenase-like [Erythranthe guttata]	XM_013001312.1	XM_013001312	244	1.76e-122	PREDICTED: Erythranthe guttatus flavonoid 3'-monooxygenase-like (LOC105976033), mRNA	K20623	CYP92A6	typhasterol/6-deoxotyphasterol 2alpha-hydroxylase	http://www.genome.jp/dbget-bin/www_bget?ko:K20623	Q50EK4	343	3.1e-31	Cytochrome P450 750A1 OS=Pinus taeda OX=3352 GN=CYP750A1 PE=2 SV=1	PF00067	Cytochrome P450	GO:0055114	oxidation-reduction process	GO:0016705//GO:0005506//GO:0020037	oxidoreductase activity, acting on paired donors, with incorporation or reduction of molecular oxygen//iron ion binding//heme binding	--	--	--	--	FALSE	-0.961159	0.117459	FALSE	-0.732831	0.252903	DOWN	-1.80465	0.000221893	FALSE	-1.19662	0.0364528	DOWN	-1.97927	6.65e-05
Cluster-11149.29599	10.4	4.6	11.13	24.15	24.44	1089	1276243541	PIN04156.1	325	1.6e-27	Cytochrome P450 CYP2 subfamily [Handroanthus impetiginosus]	--	--	--	--	--	-	-	-	http://www.genome.jp/dbget-bin/www_bget?ko:-	O65782	187	6.2e-13	Cytochrome P450 83B1 OS=Arabidopsis thaliana OX=3702 GN=CYP83B1 PE=1 SV=1	PF00067//PF13851	Cytochrome P450//Growth-arrest specific micro-tubule binding	GO:0048870//GO:0055114	cell motility//oxidation-reduction process	GO:0016705//GO:0020037//GO:0005506	oxidoreductase activity, acting on paired donors, with incorporation or reduction of molecular oxygen//heme binding//iron ion binding	GO:0031514	motile cilium	--	--	DOWN	-2.18335	2.67e-05	FALSE	-0.414809	0.623787	DOWN	-2.70861	5.1e-08	FALSE	-0.545045	0.489272	FALSE	-1.00977	0.0581864
Cluster-11149.21381	3.56	3.58	10.98	322.89	45.66	1798	747051778	XP_011071981.1	1576	2.3e-172	cytochrome P450 71A8-like [Sesamum indicum]	XM_011073884.2	XM_011073884	232	2.26e-115	PREDICTED: Sesamum indicum cytochrome P450 71A8-like (LOC105157478), mRNA	K07418	CYP2J	cytochrome P450 family 2 subfamily J	http://www.genome.jp/dbget-bin/www_bget?ko:K07418	Q42716	1287	2.9e-140	Cytochrome P450 71A8 OS=Mentha piperita OX=34256 GN=CYP71A8 PE=3 SV=1	PF00067	Cytochrome P450	GO:0055114	oxidation-reduction process	GO:0016705//GO:0005506//GO:0020037	oxidoreductase activity, acting on paired donors, with incorporation or reduction of molecular oxygen//iron ion binding//heme binding	--	--	--	--	DOWN	-6.28964	8.32e-31	UP	2.42524	4.32e-07	DOWN	-3.97492	1.61e-15	DOWN	-5.82941	1.09e-27	DOWN	-3.45398	2.28e-12
Cluster-11149.15368	12.89	5.37	9.77	17.98	28.2	908	1276243541	PIN04156.1	840	2.6e-87	Cytochrome P450 CYP2 subfamily [Handroanthus impetiginosus]	XM_027210905.1	XM_027210905	80	3.51e-31	PREDICTED: Coffea arabica cytochrome P450 71A1-like (LOC113692491), mRNA	-	-	-	http://www.genome.jp/dbget-bin/www_bget?ko:-	Q9LIP3	590	9.6e-60	Cytochrome P450 71B37 OS=Arabidopsis thaliana OX=3702 GN=CYP71B37 PE=3 SV=2	PF00067	Cytochrome P450	GO:0055114	oxidation-reduction process	GO:0005506//GO:0020037//GO:0016705	iron ion binding//heme binding//oxidoreductase activity, acting on paired donors, with incorporation or reduction of molecular oxygen	--	--	--	--	FALSE	-1.53323	0.00640395	FALSE	-1.04691	0.066443	DOWN	-2.69056	6.97e-08	FALSE	0.188451	0.985526	FALSE	-0.908355	0.0975871
Cluster-11149.39889	48.73	3.6	9.63	84.66	119.05	2205	1276254534	PIN12556.1	774	2.8e-79	Cytochrome P450 CYP4/CYP19/CYP26 subfamily [Handroanthus impetiginosus]	XM_012991872.1	XM_012991872	318	4.33e-163	PREDICTED: Erythranthe guttatus abscisic acid 8'-hydroxylase 1-like (LOC105967270), mRNA	-	-	-	http://www.genome.jp/dbget-bin/www_bget?ko:-	K4CI52	763	2e-79	Abscisic acid 8'-hydroxylase CYP707A2 OS=Solanum lycopersicum OX=4081 GN=CYP707A2 PE=2 SV=1	PF00067//PF16525	Cytochrome P450//Haemophore, haem-binding	GO:0055114	oxidation-reduction process	GO:0016705//GO:0020037//GO:0005506	oxidoreductase activity, acting on paired donors, with incorporation or reduction of molecular oxygen//heme binding//iron ion binding	--	--	--	--	DOWN	-4.35174	8.75e-18	FALSE	-0.888105	0.123257	DOWN	-5.35042	1.02e-24	FALSE	-0.122	1	FALSE	-1.0601	0.035607
Cluster-11149.35938	9.56	13.83	9.45	27.53	16.29	2003	747083601	XP_011089170.1	1601	3.3e-175	beta-amyrin 28-oxidase-like [Sesamum indicum]	XM_011090868.2	XM_011090868	667	0	PREDICTED: Sesamum indicum beta-amyrin 28-oxidase-like (LOC105170204), mRNA	K20667	CYP716A	beta-amyrin 28-monooxygenase	http://www.genome.jp/dbget-bin/www_bget?ko:K20667	Q2MJ20	1075	1.2e-115	Beta-amyrin 28-monooxygenase OS=Medicago truncatula OX=3880 GN=CYP716A12 PE=1 SV=1	PF00067	Cytochrome P450	GO:0055114	oxidation-reduction process	GO:0020037//GO:0005506//GO:0016705	heme binding//iron ion binding//oxidoreductase activity, acting on paired donors, with incorporation or reduction of molecular oxygen	--	--	--	--	FALSE	-0.791251	0.215565	FALSE	0.360283	0.70386	FALSE	-0.541715	0.365561	FALSE	-0.85134	0.156633	FALSE	-0.541038	0.375508
Cluster-11149.41042	4.83	4.95	8.89	16.31	5.97	492	1276236195	PIM99257.1	597	2.1e-59	Cytochrome P450 CYP2 subfamily [Handroanthus impetiginosus]	XM_028267107.1	XM_028267107	97	6.51e-41	PREDICTED: Camellia sinensis cytochrome P450 71A6-like (LOC114320017), mRNA	K07408	CYP1A1	cytochrome P450 family 1 subfamily A polypeptide 1	http://www.genome.jp/dbget-bin/www_bget?ko:K07408	O04164	538	5.6e-54	Cytochrome P450 71A6 (Fragment) OS=Nepeta racemosa OX=54731 GN=CYP71A6 PE=2 SV=1	PF00067	Cytochrome P450	GO:0055114	oxidation-reduction process	GO:0016705//GO:0020037//GO:0005506	oxidoreductase activity, acting on paired donors, with incorporation or reduction of molecular oxygen//heme binding//iron ion binding	--	--	--	--	FALSE	-1.48353	0.0317259	FALSE	1.0464	0.143892	FALSE	-0.547106	0.551338	FALSE	-1.09771	0.145073	FALSE	-0.101252	1
Cluster-11149.30639	10.6	5.96	8.62	19.47	26.77	1236	1276243539	PIN04154.1	1416	5.7e-154	Cytochrome P450 CYP2 subfamily [Handroanthus impetiginosus]	KU674339.1	KU674339	306	1.12e-156	Perilla frutescens isolate 32 perillyl alcohol and perillaldehyde synthase cytochrome P450 CYP71AT146 mRNA, complete cds	-	-	-	http://www.genome.jp/dbget-bin/www_bget?ko:-	O65782	885	8.1e-94	Cytochrome P450 83B1 OS=Arabidopsis thaliana OX=3702 GN=CYP83B1 PE=1 SV=1	PF00067	Cytochrome P450	GO:0055114	oxidation-reduction process	GO:0016705//GO:0020037//GO:0005506	oxidoreductase activity, acting on paired donors, with incorporation or reduction of molecular oxygen//heme binding//iron ion binding	--	--	--	--	FALSE	-1.50163	0.00589204	FALSE	-0.856762	0.153005	DOWN	-2.46896	4.42e-07	FALSE	-0.205092	0.94471	FALSE	-1.11178	0.0317413
Cluster-11149.39140	3.14	10.54	8.46	13.05	5.06	497	1276233608	PIM97932.1	362	3.8e-32	Cytochrome P450 [Handroanthus impetiginosus]	XM_011088594.2	XM_011088594	181	1.33e-87	PREDICTED: Sesamum indicum sterol 14-demethylase (LOC105168491), mRNA	K05917	CYP51	sterol 14-demethylase	http://www.genome.jp/dbget-bin/www_bget?ko:K05917	Q9SAA9	263	4.4e-22	Sterol 14-demethylase OS=Arabidopsis thaliana OX=3702 GN=CYP51G1 PE=1 SV=1	PF00067	Cytochrome P450	GO:0055114	oxidation-reduction process	GO:0016705//GO:0005506//GO:0020037	oxidoreductase activity, acting on paired donors, with incorporation or reduction of molecular oxygen//iron ion binding//heme binding	--	--	--	--	FALSE	-0.076985	1	FALSE	0.962715	0.222717	FALSE	0.775047	0.289325	FALSE	-1.39395	0.0686356	FALSE	-0.480792	0.691672
Cluster-11149.16922	13.03	7.73	8.18	5.51	6	625	747072134	XP_011082968.1	584	8.7e-58	cytochrome P450 CYP72A219-like [Sesamum indicum]	XM_012988874.1	XM_012988874	197	2.16e-96	PREDICTED: Erythranthe guttatus cytochrome P450 CYP72A219-like (LOC105964346), mRNA	-	-	-	http://www.genome.jp/dbget-bin/www_bget?ko:-	H2DH21	435	6.2e-42	Cytochrome P450 CYP72A219 OS=Panax ginseng OX=4054 PE=2 SV=1	PF12937//PF01194//PF00067//PF00646	F-box-like//RNA polymerases N / 8 kDa subunit//Cytochrome P450//F-box domain	GO:0006144//GO:0006206//GO:0006351//GO:0055114	purine nucleobase metabolic process//pyrimidine nucleobase metabolic process//transcription, DNA-templated//oxidation-reduction process	GO:0005506//GO:0005515//GO:0020037//GO:0003677//GO:0016705//GO:0003899	iron ion binding//protein binding//heme binding//DNA binding//oxidoreductase activity, acting on paired donors, with incorporation or reduction of molecular oxygen//DNA-directed 5'-3' RNA polymerase activity	GO:0005730	nucleolus	--	--	FALSE	0.704683	0.428926	FALSE	-0.520191	0.634637	FALSE	0.0738279	1	UP	1.90151	0.000918107	FALSE	1.33113	0.0212706
Cluster-11149.31637	17.63	11.98	7.98	24.04	38.3	2106	84578869	BAE72877.1	1845	1.8e-203	cytochrome P450 [Glandularia x hybrida]	KP337691.1	KP337691	345	4.05e-178	Salvia miltiorrhiza cytochrome P450 CYP76S7 mRNA, complete cds	-	-	-	http://www.genome.jp/dbget-bin/www_bget?ko:-	W8JMV1	1508	8e-166	Cytochrome P450 76T24 OS=Catharanthus roseus OX=4058 GN=CYP76T24 PE=2 SV=1	PF00067	Cytochrome P450	GO:0055114	oxidation-reduction process	GO:0020037//GO:0005506//GO:0016705	heme binding//iron ion binding//oxidoreductase activity, acting on paired donors, with incorporation or reduction of molecular oxygen	--	--	--	--	FALSE	-0.803177	0.205855	FALSE	-1.06825	0.0514622	DOWN	-1.98216	3.01e-05	FALSE	0.22731	0.892507	FALSE	-0.890923	0.0904691
Cluster-11149.35968	20.03	12.01	7.9	25.38	53.69	988	604303052	EYU22577.1	987	2.5e-104	hypothetical protein MIMGU_mgv1a004830mg [Erythranthe guttata]	XM_011072602.2	XM_011072602	270	9.17e-137	PREDICTED: Sesamum indicum cytochrome P450 CYP749A22-like (LOC105156467), mRNA	-	-	-	http://www.genome.jp/dbget-bin/www_bget?ko:-	H2DH17	792	4e-83	Cytochrome P450 CYP749A22 OS=Panax ginseng OX=4054 PE=2 SV=1	PF07378//PF00067	Flagellar protein FlbT//Cytochrome P450	GO:0006402//GO:0055114//GO:1902209	mRNA catabolic process//oxidation-reduction process//negative regulation of bacterial-type flagellum assembly	GO:0016705//GO:0048027//GO:0005506//GO:0020037	oxidoreductase activity, acting on paired donors, with incorporation or reduction of molecular oxygen//mRNA 5'-UTR binding//iron ion binding//heme binding	--	--	--	--	FALSE	-0.870983	0.168442	DOWN	-1.47885	0.00419208	DOWN	-2.46048	3.23e-07	FALSE	0.328408	0.80204	FALSE	-1.20037	0.0183313
Cluster-11149.9921	16.19	9.81	7.71	14.52	164.2	2194	747092368	XP_011093941.1	1618	3.8e-177	beta-amyrin 28-oxidase-like [Sesamum indicum]	XM_011095639.2	XM_011095639	601	0	PREDICTED: Sesamum indicum beta-amyrin 28-oxidase-like (LOC105173756), mRNA	K20667	CYP716A	beta-amyrin 28-monooxygenase	http://www.genome.jp/dbget-bin/www_bget?ko:K20667	A5BFI4	1429	1.2e-156	Beta-amyrin 28-monooxygenase OS=Vitis vinifera OX=29760 GN=CYP716A17 PE=1 SV=2	PF00067//PF07972	Cytochrome P450//NrdI Flavodoxin like	GO:0055114//GO:0006464	oxidation-reduction process//cellular protein modification process	GO:0016705//GO:0010181//GO:0020037//GO:0005506	oxidoreductase activity, acting on paired donors, with incorporation or reduction of molecular oxygen//FMN binding//heme binding//iron ion binding	--	--	--	--	FALSE	-0.364809	0.744828	DOWN	-3.89504	4.24e-15	DOWN	-4.37058	1.14e-18	FALSE	0.831602	0.168073	DOWN	-3.1134	5.85e-11
Cluster-11149.13324	4.59	5.19	7.2	7.01	12.82	698	747051776	XP_011071980.1	813	2.7e-84	cytochrome P450 71A6-like [Sesamum indicum]	EU108707.1	EU108707	79	9.58e-31	Mentha arvensis clone SAKGMFS63 menthofuran synthase gene, complete cds >gb|EU108708.1| Mentha arvensis clone SAKCMFS83 menthofuran synthase mRNA, complete sequence	-	-	-	http://www.genome.jp/dbget-bin/www_bget?ko:-	O04164	764	4.9e-80	Cytochrome P450 71A6 (Fragment) OS=Nepeta racemosa OX=54731 GN=CYP71A6 PE=2 SV=1	PF00067	Cytochrome P450	GO:0055114	oxidation-reduction process	GO:0016705//GO:0020037//GO:0005506	oxidoreductase activity, acting on paired donors, with incorporation or reduction of molecular oxygen//heme binding//iron ion binding	--	--	--	--	FALSE	-0.217462	0.992462	FALSE	-1.26884	0.0356939	DOWN	-1.59667	0.00395103	FALSE	0.0546826	1	FALSE	-1.26366	0.0315724
Cluster-11149.28491	7.86	14.48	7.12	7.61	10.54	2229	1173825556	XP_020552678.1	1133	6.8e-121	cytochrome P450 CYP736A12-like [Sesamum indicum]	XM_020697019.1	XM_020697019	390	0	PREDICTED: Sesamum indicum cytochrome P450 CYP736A12-like (LOC105171247), mRNA	K20562	CYP736A	biphenyl-4-hydroxylase	http://www.genome.jp/dbget-bin/www_bget?ko:K20562	A0A068Q5V6	742	5.6e-77	Cytochrome P450 71AU50 OS=Prunus mume OX=102107 GN=CYP71AU50 PE=2 SV=1	PF00067	Cytochrome P450	GO:0055114	oxidation-reduction process	GO:0016705//GO:0005506//GO:0020037	oxidoreductase activity, acting on paired donors, with incorporation or reduction of molecular oxygen//iron ion binding//heme binding	--	--	--	--	FALSE	1.12992	0.0451459	FALSE	-0.866983	0.148103	FALSE	0.15216	0.908031	FALSE	0.722822	0.272497	FALSE	-0.194129	0.856457
Cluster-11178.0	1.88	0.5	7.09	0.09	0.12	1738	1276259425	PIN16612.1	2158	7.4e-240	Cytochrome P450 CYP2 subfamily [Handroanthus impetiginosus]	XM_011102649.2	XM_011102649	915	0	PREDICTED: Sesamum indicum cytochrome P450 84A1-like (LOC105179054), mRNA	K09755	CYP84A, F5H	ferulate-5-hydroxylase	http://www.genome.jp/dbget-bin/www_bget?ko:K09755	Q42600	1857	2.2e-206	Cytochrome P450 84A1 OS=Arabidopsis thaliana OX=3702 GN=CYP84A1 PE=1 SV=1	PF00067	Cytochrome P450	GO:0055114	oxidation-reduction process	GO:0016705//GO:0005506//GO:0020037	oxidoreductase activity, acting on paired donors, with incorporation or reduction of molecular oxygen//iron ion binding//heme binding	--	--	--	--	FALSE	2.71187	0.0412473	FALSE	-0.810376	0.997555	FALSE	1.78721	0.145396	UP	5.06864	1.78e-10	UP	4.20407	3.42e-08
Cluster-11149.19040	22.1	10.88	6.51	28.58	51.18	1247	848914554	XP_012855179.1	1074	2.6e-114	PREDICTED: uncharacterized protein LOC105974611 [Erythranthe guttata]	XM_027296718.1	XM_027296718	84	2.91e-33	PREDICTED: Coffea eugenioides cytochrome P450 CYP749A22-like (LOC113752622), mRNA	-	-	-	http://www.genome.jp/dbget-bin/www_bget?ko:-	H2DH17	767	4e-80	Cytochrome P450 CYP749A22 OS=Panax ginseng OX=4054 PE=2 SV=1	PF00067	Cytochrome P450	GO:0055114	oxidation-reduction process	GO:0016705//GO:0020037//GO:0005506	oxidoreductase activity, acting on paired donors, with incorporation or reduction of molecular oxygen//heme binding//iron ion binding	--	--	--	--	FALSE	-1.18741	0.0353118	FALSE	-1.23744	0.0200033	DOWN	-2.53553	1.18e-07	FALSE	0.300645	0.806498	FALSE	-0.986761	0.0570807
Cluster-11149.32850	8.07	8.6	6.44	27.39	11.37	3067	848855554	XP_012852863.1	1954	5.9e-216	PREDICTED: cytochrome P450 CYP82D47-like [Erythranthe guttata]	XM_012997409.1	XM_012997409	465	0	PREDICTED: Erythranthe guttatus cytochrome P450 CYP82D47-like (LOC105972444), mRNA	-	-	-	http://www.genome.jp/dbget-bin/www_bget?ko:-	Q9SZ46	1298	2.6e-141	Xanthotoxin 5-hydroxylase CYP82C4 OS=Arabidopsis thaliana OX=3702 GN=CYP82C4 PE=1 SV=1	PF00005//PF00067//PF00503//PF03193	ABC transporter//Cytochrome P450//G-protein alpha subunit//RsgA GTPase	GO:0055114//GO:0007186	oxidation-reduction process//G protein-coupled receptor signaling pathway	GO:0016705//GO:0020037//GO:0003924//GO:0031683//GO:0005524//GO:0016887//GO:0019001//GO:0005506//GO:0005525	oxidoreductase activity, acting on paired donors, with incorporation or reduction of molecular oxygen//heme binding//GTPase activity//G-protein beta/gamma-subunit complex binding//ATP binding//ATPase activity//guanyl nucleotide binding//iron ion binding//GTP binding	--	--	--	--	DOWN	-1.47105	0.00460743	FALSE	0.872577	0.137878	FALSE	-0.709218	0.198031	FALSE	-1.08753	0.0498422	FALSE	-0.264954	0.742771
Cluster-11149.19545	7.42	2.66	6.4	9.52	22.08	1495	848881578	XP_012841143.1	1747	2.9e-192	PREDICTED: cytochrome P450 71A1-like [Erythranthe guttata]	XM_012980777.1	XM_012980777	113	2.65e-49	PREDICTED: Erythranthe guttatus cytochrome P450 83B1-like (LOC105956867), mRNA	-	-	-	http://www.genome.jp/dbget-bin/www_bget?ko:-	O65782	1111	6.1e-120	Cytochrome P450 83B1 OS=Arabidopsis thaliana OX=3702 GN=CYP83B1 PE=1 SV=1	PF00067	Cytochrome P450	GO:0055114	oxidation-reduction process	GO:0020037//GO:0005506//GO:0016705	heme binding//iron ion binding//oxidoreductase activity, acting on paired donors, with incorporation or reduction of molecular oxygen	--	--	--	--	DOWN	-1.63696	0.00338653	DOWN	-1.60958	0.00178463	DOWN	-3.35693	2.64e-11	FALSE	0.312503	0.806498	FALSE	-1.34696	0.00788407
Cluster-11149.37915	2.72	5.29	6.18	32.19	19.13	2165	1279041673	XP_022882875.1	805	7.1e-83	cytochrome P450 71A8-like [Olea europaea var. sylvestris]	XM_012998615.1	XM_012998615	217	5.94e-107	PREDICTED: Erythranthe guttatus cytochrome P450 71A8-like (LOC105973582), mRNA	K07418	CYP2J	cytochrome P450 family 2 subfamily J	http://www.genome.jp/dbget-bin/www_bget?ko:K07418	Q42716	775	8.1e-81	Cytochrome P450 71A8 OS=Mentha piperita OX=34256 GN=CYP71A8 PE=3 SV=1	PF00067	Cytochrome P450	GO:0055114	oxidation-reduction process	GO:0005506//GO:0020037//GO:0016705	iron ion binding//heme binding//oxidoreductase activity, acting on paired donors, with incorporation or reduction of molecular oxygen	--	--	--	--	DOWN	-2.40375	1.07e-06	FALSE	0.35433	0.70386	DOWN	-2.16008	7.36e-06	DOWN	-2.89095	6.24e-09	DOWN	-2.58643	1.36e-07
Cluster-11149.35712	9.03	15.76	6.03	1.91	5.85	3102	747047565	XP_011069758.1	896	2.9e-93	isoflavone 2'-hydroxylase-like [Sesamum indicum]	XM_011071456.2	XM_011071456	190	8.74e-92	PREDICTED: Sesamum indicum isoflavone 2'-hydroxylase-like (LOC105155566), mRNA	-	-	-	http://www.genome.jp/dbget-bin/www_bget?ko:-	W8JMU7	583	2.1e-58	Cytochrome P450 81Q32 OS=Catharanthus roseus OX=4058 GN=CYP81Q32 PE=2 SV=1	PF03997//PF00067	VPS28 protein//Cytochrome P450	GO:0055114//GO:0032509	oxidation-reduction process//endosome transport via multivesicular body sorting pathway	GO:0016705//GO:0005506//GO:0020037	oxidoreductase activity, acting on paired donors, with incorporation or reduction of molecular oxygen//iron ion binding//heme binding	GO:0000813	ESCRT I complex	--	--	UP	3.24709	8.02e-11	DOWN	-2.01213	9.83e-05	FALSE	1.1241	0.025936	UP	2.91923	5.04e-09	FALSE	0.857158	0.109156
Cluster-11149.39712	5.52	6.24	6.02	12.21	13.38	2297	1276247352	PIN06972.1	1219	7.4e-131	Cytochrome P450 CYP4/CYP19/CYP26 subfamily [Handroanthus impetiginosus]	XM_011076218.2	XM_011076218	444	0	PREDICTED: Sesamum indicum cytochrome P450 734A1 (LOC105159229), transcript variant X2, mRNA	-	-	-	http://www.genome.jp/dbget-bin/www_bget?ko:-	O48786	676	2.6e-69	Cytochrome P450 734A1 OS=Arabidopsis thaliana OX=3702 GN=CYP734A1 PE=2 SV=1	PF05361//PF00067	PKC-activated protein phosphatase-1 inhibitor//Cytochrome P450	GO:0042325//GO:0055114	regulation of phosphorylation//oxidation-reduction process	GO:0016705//GO:0005506//GO:0020037	oxidoreductase activity, acting on paired donors, with incorporation or reduction of molecular oxygen//iron ion binding//heme binding	GO:0005737	cytoplasm	--	--	FALSE	-0.767836	0.244997	FALSE	-0.527803	0.482004	DOWN	-1.40634	0.00477857	FALSE	-0.471763	0.563975	FALSE	-1.0495	0.0437106
Cluster-11149.20342	5.99	7.92	6	15.5	9.48	1685	604304786	EYU24037.1	1880	1.2e-207	hypothetical protein MIMGU_mgv1a005167mg [Erythranthe guttata]	XM_012998124.1	XM_012998124	327	3.27e-168	PREDICTED: Erythranthe guttatus cytochrome P450 CYP736A12-like (LOC105973109), mRNA	-	-	-	http://www.genome.jp/dbget-bin/www_bget?ko:-	A0A068Q5V6	1441	3.7e-158	Cytochrome P450 71AU50 OS=Prunus mume OX=102107 GN=CYP71AU50 PE=2 SV=1	PF00067	Cytochrome P450	GO:0055114	oxidation-reduction process	GO:0005506//GO:0020037//GO:0016705	iron ion binding//heme binding//oxidoreductase activity, acting on paired donors, with incorporation or reduction of molecular oxygen	--	--	--	--	FALSE	-0.765199	0.244997	FALSE	0.313135	0.781276	FALSE	-0.562767	0.356686	FALSE	-0.696777	0.309445	FALSE	-0.433603	0.529756
Cluster-11149.26238	8.3	10.28	5.74	1.57	17.14	2212	747070365	XP_011082000.1	1505	4.9e-164	cytochrome P450 714C2-like [Sesamum indicum]	XM_011083698.2	XM_011083698	482	0	PREDICTED: Sesamum indicum cytochrome P450 714C2-like (LOC105164885), mRNA	-	-	-	http://www.genome.jp/dbget-bin/www_bget?ko:-	Q2QYH7	896	7.7e-95	Cytochrome P450 714C2 OS=Oryza sativa subsp. japonica OX=39947 GN=CYP714C2 PE=2 SV=1	PF00067	Cytochrome P450	GO:0055114	oxidation-reduction process	GO:0016705//GO:0020037//GO:0005506	oxidoreductase activity, acting on paired donors, with incorporation or reduction of molecular oxygen//heme binding//iron ion binding	--	--	--	--	UP	2.91095	1.53e-08	DOWN	-3.84325	1.3e-13	FALSE	-1.04316	0.0408182	UP	3.0755	2.25e-09	FALSE	-0.817531	0.133297
Cluster-11149.39700	12.93	2.16	5.73	6.62	7.48	1170	1276243539	PIN04154.1	1590	3.6e-174	Cytochrome P450 CYP2 subfamily [Handroanthus impetiginosus]	XM_012985689.1	XM_012985689	321	4.87e-165	PREDICTED: Erythranthe guttatus cytochrome P450 71A1-like (LOC105961457), mRNA	-	-	-	http://www.genome.jp/dbget-bin/www_bget?ko:-	P24465	1003	1.6e-107	Cytochrome P450 71A1 OS=Persea americana OX=3435 GN=CYP71A1 PE=1 SV=2	PF00067	Cytochrome P450	GO:0055114	oxidation-reduction process	GO:0016705//GO:0020037//GO:0005506	oxidoreductase activity, acting on paired donors, with incorporation or reduction of molecular oxygen//heme binding//iron ion binding	--	--	--	--	FALSE	-1.41051	0.024938	FALSE	-0.573212	0.464541	DOWN	-2.0939	0.000119692	UP	1.63656	0.00221487	FALSE	1.01331	0.0618342
Cluster-11149.43468	5.77	9.44	5.46	29.02	11.87	541	--	--	--	--	--	XM_011103534.2	XM_011103534	55	1.61e-17	PREDICTED: Sesamum indicum cytochrome P450 724B1 (LOC105179881), mRNA	--	--	--	--	--	--	--	--	--	--	--	--	--	--	--	--	--	--	FALSE	-1.39382	0.0184606	FALSE	0.889163	0.179221	FALSE	-0.615084	0.375915	FALSE	-1.6695	0.00520608	FALSE	-0.83002	0.221645
Cluster-11149.36203	3.47	7.69	5.26	1.51	3.02	841	747051776	XP_011071980.1	1060	7.4e-113	cytochrome P450 71A6-like [Sesamum indicum]	XM_016346310.2	XM_016346310	35	3.35e-06	PREDICTED: Arachis ipaensis cytochrome P450 71D8 (LOC107642828), mRNA	-	-	-	http://www.genome.jp/dbget-bin/www_bget?ko:-	O04164	940	2.3e-100	Cytochrome P450 71A6 (Fragment) OS=Nepeta racemosa OX=54731 GN=CYP71A6 PE=2 SV=1	PF00067	Cytochrome P450	GO:0055114	oxidation-reduction process	GO:0020037//GO:0005506//GO:0016705	heme binding//iron ion binding//oxidoreductase activity, acting on paired donors, with incorporation or reduction of molecular oxygen	--	--	--	--	UP	2.55343	3.76e-05	FALSE	-1.39328	0.0807119	FALSE	1.04899	0.100279	FALSE	1.8636	0.00876252	FALSE	0.420687	0.677614
Cluster-11149.16283	12.18	7.54	5.24	10.77	13.68	2994	747090962	XP_011093193.1	1152	5.7e-123	cytochrome P450 704C1 isoform X1 [Sesamum indicum]	XM_011094891.2	XM_011094891	463	0	PREDICTED: Sesamum indicum cytochrome P450 704C1 (LOC105173213), transcript variant X1, mRNA	-	-	-	http://www.genome.jp/dbget-bin/www_bget?ko:-	Q50EK3	600	2.2e-60	Cytochrome P450 704C1 OS=Pinus taeda OX=3352 GN=CYP704C1 PE=2 SV=1	PF00067	Cytochrome P450	GO:0055114	oxidation-reduction process	GO:0016705//GO:0020037//GO:0005506	oxidoreductase activity, acting on paired donors, with incorporation or reduction of molecular oxygen//heme binding//iron ion binding	--	--	--	--	FALSE	-0.314664	0.824857	FALSE	-0.740222	0.239863	FALSE	-1.16562	0.0203259	FALSE	0.853137	0.153097	FALSE	0.0629202	1
Cluster-11149.16607	1.77	4.48	5.09	7.49	4.48	3799	1276256371	PIN14083.1	473	3.9e-44	FKBP-type peptidyl-prolyl cis-trans isomerase [Handroanthus impetiginosus]	XM_011089552.2	XM_011089552	209	2.94e-102	PREDICTED: Sesamum indicum peptidyl-prolyl cis-trans isomerase FKBP42 (LOC105169206), mRNA	-	-	-	http://www.genome.jp/dbget-bin/www_bget?ko:-	Q9LDC0	448	1.2e-42	Peptidyl-prolyl cis-trans isomerase FKBP42 OS=Arabidopsis thaliana OX=3702 GN=FKBP42 PE=1 SV=1	PF00515//PF13181//PF13174//PF13176//PF00067	Tetratricopeptide repeat//Tetratricopeptide repeat//Tetratricopeptide repeat//Tetratricopeptide repeat//Cytochrome P450	GO:0055114	oxidation-reduction process	GO:0016705//GO:0005515//GO:0005506//GO:0020037	oxidoreductase activity, acting on paired donors, with incorporation or reduction of molecular oxygen//protein binding//iron ion binding//heme binding	--	--	--	--	FALSE	-0.541669	0.497935	FALSE	0.345417	0.725665	FALSE	-0.306985	0.694157	FALSE	-1.40246	0.00957382	FALSE	-1.10694	0.0377972
Cluster-11149.30886	1.71	4.14	4.95	0.4	0.61	1740	848872923	XP_012837021.1	1686	4e-185	PREDICTED: cytochrome P450 87A3-like [Erythranthe guttata]	--	--	--	--	--	-	-	-	http://www.genome.jp/dbget-bin/www_bget?ko:-	Q7XU38	1001	4.1e-107	Cytochrome P450 87A3 OS=Oryza sativa subsp. japonica OX=39947 GN=CYP87A3 PE=2 SV=3	PF00067//PF04117	Cytochrome P450//Mpv17 / PMP22 family	GO:0055114	oxidation-reduction process	GO:0016705//GO:0005506//GO:0020037	oxidoreductase activity, acting on paired donors, with incorporation or reduction of molecular oxygen//iron ion binding//heme binding	GO:0016021	integral component of membrane	--	--	UP	3.57302	4.81e-09	FALSE	-1.00224	0.387665	UP	2.45909	2.95e-05	UP	2.76536	3.59e-05	FALSE	1.71282	0.00818195
Cluster-11149.37095	4.09	2.08	4.74	2.76	9.68	1947	1276242608	PIN03479.1	2024	2.8e-224	Cytochrome P450 CYP4/CYP19/CYP26 subfamily [Handroanthus impetiginosus]	XM_011096078.2	XM_011096078	570	0	PREDICTED: Sesamum indicum cytochrome P450 94C1-like (LOC105174092), mRNA	-	-	-	http://www.genome.jp/dbget-bin/www_bget?ko:-	Q9ZUX1	1454	1.3e-159	Cytochrome P450 94C1 OS=Arabidopsis thaliana OX=3702 GN=CYP94C1 PE=1 SV=1	PF07074//PF00067	Translocon-associated protein, gamma subunit (TRAP-gamma)//Cytochrome P450	GO:0006614//GO:0055114	SRP-dependent cotranslational protein targeting to membrane//oxidation-reduction process	GO:0020037//GO:0005506//GO:0016705	heme binding//iron ion binding//oxidoreductase activity, acting on paired donors, with incorporation or reduction of molecular oxygen	GO:0016021	integral component of membrane	--	--	FALSE	-0.208302	1	DOWN	-2.2062	1.71e-05	DOWN	-2.52499	4.73e-07	FALSE	1.24127	0.0360651	FALSE	-1.01473	0.0595338
Cluster-11149.12667	3.56	6.76	4.67	12.12	16.48	1678	747042658	XP_011079634.1	620	1.6e-61	cytochrome P450 71A1 [Sesamum indicum]	XM_011081332.2	XM_011081332	180	1.7e-86	PREDICTED: Sesamum indicum cytochrome P450 71A1 (LOC105163106), mRNA	K20623	CYP92A6	typhasterol/6-deoxotyphasterol 2alpha-hydroxylase	http://www.genome.jp/dbget-bin/www_bget?ko:K20623	A0A1D6F9Y9	415	3.5e-39	Trimethyltridecatetraene synthase OS=Zea mays OX=4577 GN=CYP92C6 PE=1 SV=1	PF00067	Cytochrome P450	GO:0055114	oxidation-reduction process	GO:0020037//GO:0005506//GO:0016705	heme binding//iron ion binding//oxidoreductase activity, acting on paired donors, with incorporation or reduction of molecular oxygen	--	--	--	--	FALSE	-0.639199	0.380656	FALSE	-0.840343	0.163519	DOWN	-1.59021	0.00131355	FALSE	-1.09317	0.0640174	DOWN	-1.98332	6.62e-05
Cluster-11149.36431	4.18	5.38	4.6	11.07	8.3	4968	1276261447	PIN18285.1	2868	0	hypothetical protein CDL12_09044 [Handroanthus impetiginosus]	XM_011072828.1	XM_011072828	978	0	PREDICTED: Sesamum indicum uncharacterized LOC105156622 (LOC105156622), transcript variant X5, mRNA	-	-	-	http://www.genome.jp/dbget-bin/www_bget?ko:-	D1MI46	617	3.9e-62	geraniol 8-hydroxylase OS=Swertia mussotii OX=137888 GN=CYP76B10 PE=1 SV=1	PF00067	Cytochrome P450	GO:0055114	oxidation-reduction process	GO:0016705//GO:0020037//GO:0005506	oxidoreductase activity, acting on paired donors, with incorporation or reduction of molecular oxygen//heme binding//iron ion binding	--	--	--	--	FALSE	-0.842164	0.169851	FALSE	0.0201666	1	FALSE	-0.932742	0.0730837	FALSE	-0.729443	0.252837	FALSE	-0.759254	0.169928
Cluster-11149.35893	2.49	6.95	4.34	7.16	8.15	732	747093271	XP_011094433.1	872	4.1e-91	cytochrome P450 76A1-like [Sesamum indicum]	--	--	--	--	--	K20618	CYP76A	cytochrome P450 family 76 subfamily A	http://www.genome.jp/dbget-bin/www_bget?ko:K20618	W8JIS5	582	6.6e-59	Iridoid oxidase OS=Catharanthus roseus OX=4058 GN=IO PE=1 SV=1	PF13001//PF00067	Proteasome stabiliser//Cytochrome P450	GO:0055114//GO:0043248	oxidation-reduction process//proteasome assembly	GO:0016705//GO:0060090//GO:0005506//GO:0020037	oxidoreductase activity, acting on paired donors, with incorporation or reduction of molecular oxygen//molecular adaptor activity//iron ion binding//heme binding	--	--	--	--	FALSE	0.168961	1	FALSE	-0.584817	0.499317	FALSE	-0.526428	0.448908	FALSE	-0.858949	0.305602	FALSE	-1.49299	0.0155358
Cluster-11149.38577	1.91	5.96	4.34	7.48	9.52	1405	747093271	XP_011094433.1	1399	6.1e-152	cytochrome P450 76A1-like [Sesamum indicum]	--	--	--	--	--	K20618	CYP76A	cytochrome P450 family 76 subfamily A	http://www.genome.jp/dbget-bin/www_bget?ko:K20618	W8JIS5	1016	6e-109	Iridoid oxidase OS=Catharanthus roseus OX=4058 GN=IO PE=1 SV=1	PF00067//PF11087	Cytochrome P450//PRD1 phage membrane DNA delivery	GO:0055114	oxidation-reduction process	GO:0020037//GO:0005506//GO:0016705	heme binding//iron ion binding//oxidoreductase activity, acting on paired donors, with incorporation or reduction of molecular oxygen	GO:0039641	viral inner membrane	--	--	FALSE	-0.124861	1	FALSE	-0.743403	0.268456	FALSE	-0.97892	0.0732329	FALSE	-1.29536	0.034396	DOWN	-2.08829	7.56e-05
Cluster-11149.18315	1.65	3.26	4.21	2.15	3.55	407	--	--	--	--	--	KP337741.1	KP337741	65	3.27e-23	Salvia miltiorrhiza cytochrome P450 CYP704A99 mRNA, complete cds	-	-	-	http://www.genome.jp/dbget-bin/www_bget?ko:-	--	--	--	--	--	--	--	--	--	--	--	--	--	--	FALSE	0.838075	0.680584	FALSE	-1.11128	0.482961	FALSE	-0.38317	0.92366	FALSE	0.259683	1	FALSE	-0.897966	0.665559
Cluster-11149.38507	2.89	3.4	3.87	4.17	3.95	3742	747058800	XP_011075746.1	1673	2.7e-183	putative late blight resistance protein homolog R1A-10 [Sesamum indicum]	--	--	--	--	--	-	-	-	http://www.genome.jp/dbget-bin/www_bget?ko:-	Q6L403	867	3e-91	Putative late blight resistance protein homolog R1B-17 OS=Solanum demissum OX=50514 GN=R1B-17 PE=3 SV=1	PF00005//PF00067//PF00931//PF00560	ABC transporter//Cytochrome P450//NB-ARC domain//Leucine Rich Repeat	GO:0055114	oxidation-reduction process	GO:0016887//GO:0005524//GO:0005506//GO:0043531//GO:0005515//GO:0020037//GO:0016705	ATPase activity//ATP binding//iron ion binding//ADP binding//protein binding//heme binding//oxidoreductase activity, acting on paired donors, with incorporation or reduction of molecular oxygen	--	--	--	--	FALSE	-0.0938644	1	FALSE	-0.316377	0.775201	FALSE	-0.52096	0.416078	FALSE	0.145462	1	FALSE	-0.22088	0.833894
Cluster-11149.40745	8.82	0.15	3.85	10.33	64.99	1696	1173820758	XP_011088865.2	2020	7.2e-224	LOW QUALITY PROTEIN: cytochrome P450 94C1 [Sesamum indicum]	XM_025134687.1	XM_025134687	89	6.62e-36	PREDICTED: Cynara cardunculus var. scolymus cytochrome P450 94C1-like (LOC112524730), mRNA	-	-	-	http://www.genome.jp/dbget-bin/www_bget?ko:-	Q9ZUX1	1480	1.1e-162	Cytochrome P450 94C1 OS=Arabidopsis thaliana OX=3702 GN=CYP94C1 PE=1 SV=1	PF00067	Cytochrome P450	GO:0055114	oxidation-reduction process	GO:0020037//GO:0005506//GO:0016705	heme binding//iron ion binding//oxidoreductase activity, acting on paired donors, with incorporation or reduction of molecular oxygen	--	--	--	--	DOWN	-5.84991	5.95e-18	DOWN	-3.04929	4.22e-10	DOWN	-9.0035	3.64e-39	FALSE	0.445133	0.61591	DOWN	-2.65404	2.76e-08
Cluster-11149.6220	4.57	5.06	3.73	7.24	3.05	1660	747102319	XP_011099321.1	1936	3.9e-214	cytochrome P450 81D1-like [Sesamum indicum]	XM_011101019.2	XM_011101019	634	0	PREDICTED: Sesamum indicum cytochrome P450 81D1-like (LOC105177771), mRNA	-	-	-	http://www.genome.jp/dbget-bin/www_bget?ko:-	W8JMU7	1405	5.5e-154	Cytochrome P450 81Q32 OS=Catharanthus roseus OX=4058 GN=CYP81Q32 PE=2 SV=1	PF00067	Cytochrome P450	GO:0055114	oxidation-reduction process	GO:0016705//GO:0020037//GO:0005506	oxidoreductase activity, acting on paired donors, with incorporation or reduction of molecular oxygen//heme binding//iron ion binding	--	--	--	--	FALSE	-0.314727	0.835728	FALSE	0.849674	0.194938	FALSE	0.424233	0.554884	FALSE	0.00834401	1	FALSE	0.807871	0.175798
Cluster-11149.17603	3.29	7.65	3.7	0.93	1.61	2472	747075491	XP_011084782.1	1883	8.1e-208	cytochrome P450 714A1 [Sesamum indicum]	XM_011086480.2	XM_011086480	685	0	PREDICTED: Sesamum indicum cytochrome P450 714A1 (LOC105166955), mRNA	-	-	-	http://www.genome.jp/dbget-bin/www_bget?ko:-	Q93Z79	1305	3.2e-142	Cytochrome P450 714A1 OS=Arabidopsis thaliana OX=3702 GN=CYP714A1 PE=2 SV=1	PF00067	Cytochrome P450	GO:0055114	oxidation-reduction process	GO:0005506//GO:0020037//GO:0016705	iron ion binding//heme binding//oxidoreductase activity, acting on paired donors, with incorporation or reduction of molecular oxygen	--	--	--	--	UP	3.23807	8.16e-10	FALSE	-1.18262	0.0742023	UP	1.94444	0.000131893	UP	2.49548	4.03e-06	FALSE	1.26286	0.022947
Cluster-11149.15182	12.81	4.87	3.62	12.04	23.03	851	1279114965	XP_022881861.1	396	7.4e-36	cytochrome P450 CYP749A22-like [Olea europaea var. sylvestris]	XM_012999725.1	XM_012999725	119	6.85e-53	PREDICTED: Erythranthe guttatus uncharacterized LOC105974611 (LOC105974611), mRNA	-	-	-	http://www.genome.jp/dbget-bin/www_bget?ko:-	H2DH17	318	3.1e-28	Cytochrome P450 CYP749A22 OS=Panax ginseng OX=4054 PE=2 SV=1	PF00067	Cytochrome P450	GO:0055114	oxidation-reduction process	GO:0016705//GO:0020037//GO:0005506	oxidoreductase activity, acting on paired donors, with incorporation or reduction of molecular oxygen//heme binding//iron ion binding	--	--	--	--	FALSE	-1.09504	0.0925901	FALSE	-1.33406	0.0150694	DOWN	-2.53947	6.3e-07	FALSE	0.757392	0.26573	FALSE	-0.626545	0.298
Cluster-11149.4027	2.74	5.27	3.43	5.96	13.72	1780	747071855	XP_011082818.1	2176	6.2e-242	cytochrome P450 CYP72A219 [Sesamum indicum]	XM_011084516.2	XM_011084516	727	0	PREDICTED: Sesamum indicum cytochrome P450 CYP72A219 (LOC105165490), mRNA	-	-	-	http://www.genome.jp/dbget-bin/www_bget?ko:-	W8JWW3	1471	1.3e-161	Cytochrome P450 72A225 OS=Catharanthus roseus OX=4058 GN=CYP72A225 PE=2 SV=1	PF00067	Cytochrome P450	GO:0055114	oxidation-reduction process	GO:0016705//GO:0005506//GO:0020037	oxidoreductase activity, acting on paired donors, with incorporation or reduction of molecular oxygen//iron ion binding//heme binding	--	--	--	--	FALSE	0.0247069	1	DOWN	-1.59986	0.00217524	DOWN	-1.68582	0.000644874	FALSE	-0.445874	0.665075	DOWN	-2.09546	2.96e-05
Cluster-11149.11415	3.94	3.55	3.29	4.06	3.74	469	--	--	--	--	--	KT150518.1	KT150518	45	4.99e-12	Kalopanax septemlobus cytochrome P450 CYP72A398 mRNA, complete cds	--	--	--	--	--	--	--	--	--	--	--	--	--	--	--	--	--	--	FALSE	0.0412534	1	FALSE	-0.278531	0.985502	FALSE	-0.347183	0.821967	FALSE	0.605277	0.70001	FALSE	0.276855	0.998244
Cluster-11149.35141	2.26	3.11	3.23	4.29	7.78	4492	1173782174	XP_020547584.1	1126	8.8e-120	cytochrome P450 81E8-like isoform X3 [Sesamum indicum]	XM_020691925.1	XM_020691925	455	0	PREDICTED: Sesamum indicum cytochrome P450 81E8-like (LOC105155572), transcript variant X3, mRNA	-	-	-	http://www.genome.jp/dbget-bin/www_bget?ko:-	W8JMU7	596	9.6e-60	Cytochrome P450 81Q32 OS=Catharanthus roseus OX=4058 GN=CYP81Q32 PE=2 SV=1	PF00067//PF00665	Cytochrome P450//Integrase core domain	GO:0055114//GO:0015074	oxidation-reduction process//DNA integration	GO:0020037//GO:0005506//GO:0016705	heme binding//iron ion binding//oxidoreductase activity, acting on paired donors, with incorporation or reduction of molecular oxygen	--	--	--	--	FALSE	-0.262068	0.872733	FALSE	-1.25445	0.0191628	DOWN	-1.62722	0.00087545	FALSE	-0.248957	0.871512	DOWN	-1.5533	0.00174215
Cluster-11149.10238	16.16	5.07	3.19	21.38	26.32	473	1024022413	KZV38335.1	671	5.3e-68	hypothetical protein F511_24094 [Dorcoceras hygrometricum]	XM_011072602.2	XM_011072602	173	3.52e-83	PREDICTED: Sesamum indicum cytochrome P450 CYP749A22-like (LOC105156467), mRNA	-	-	-	http://www.genome.jp/dbget-bin/www_bget?ko:-	H2DH17	524	2.3e-52	Cytochrome P450 CYP749A22 OS=Panax ginseng OX=4054 PE=2 SV=1	PF00067	Cytochrome P450	GO:0055114	oxidation-reduction process	GO:0016705//GO:0005506//GO:0020037	oxidoreductase activity, acting on paired donors, with incorporation or reduction of molecular oxygen//iron ion binding//heme binding	--	--	--	--	DOWN	-1.83692	0.00370897	FALSE	-0.700106	0.357601	DOWN	-2.6467	2.48e-06	FALSE	0.249152	0.9351	FALSE	-0.500768	0.483601
Cluster-11149.10669	4.55	5.72	3.11	4.03	9.04	1997	747067752	XP_011080614.1	2136	3e-237	cytochrome P450 714C2-like [Sesamum indicum]	XM_011082312.2	XM_011082312	722	0	PREDICTED: Sesamum indicum cytochrome P450 714C2-like (LOC105163823), mRNA	-	-	-	http://www.genome.jp/dbget-bin/www_bget?ko:-	Q2QYH7	1426	2.4e-156	Cytochrome P450 714C2 OS=Oryza sativa subsp. japonica OX=39947 GN=CYP714C2 PE=2 SV=1	PF00067	Cytochrome P450	GO:0055114	oxidation-reduction process	GO:0016705//GO:0020037//GO:0005506	oxidoreductase activity, acting on paired donors, with incorporation or reduction of molecular oxygen//heme binding//iron ion binding	--	--	--	--	FALSE	0.706298	0.332898	DOWN	-1.55976	0.00317525	FALSE	-0.964187	0.0702928	FALSE	0.849578	0.190077	FALSE	-0.760055	0.181134
Cluster-11149.38402	12.64	7.99	3.01	6.09	6.91	2410	747056257	XP_011074387.1	1752	1.2e-192	cytochrome P450 81E8-like [Sesamum indicum]	XM_011076085.2	XM_011076085	567	0	PREDICTED: Sesamum indicum cytochrome P450 81E8-like (LOC105159130), mRNA	-	-	-	http://www.genome.jp/dbget-bin/www_bget?ko:-	W8JIS9	1362	7.8e-149	Cytochrome P450 81C13 OS=Catharanthus roseus OX=4058 GN=CYP81C13 PE=2 SV=1	PF00067	Cytochrome P450	GO:0055114	oxidation-reduction process	GO:0016705//GO:0005506//GO:0020037	oxidoreductase activity, acting on paired donors, with incorporation or reduction of molecular oxygen//iron ion binding//heme binding	--	--	--	--	FALSE	0.593005	0.433606	FALSE	-0.577819	0.42222	FALSE	-0.0955721	1	UP	1.72878	0.000646828	FALSE	1.10093	0.0326695
Cluster-11149.41623	7.27	0.43	2.97	0.2	0.35	3901	848889380	XP_012844854.1	2253	1.6e-250	PREDICTED: G-type lectin S-receptor-like serine/threonine-protein kinase At4g27290 [Erythranthe guttata]	XM_012989400.1	XM_012989400	448	0	PREDICTED: Erythranthe guttatus G-type lectin S-receptor-like serine/threonine-protein kinase At4g27290 (LOC105964890), mRNA	-	-	-	http://www.genome.jp/dbget-bin/www_bget?ko:-	O81832	1435	4.3e-157	G-type lectin S-receptor-like serine/threonine-protein kinase At4g27290 OS=Arabidopsis thaliana OX=3702 GN=At4g27290 PE=3 SV=4	PF00069//PF06305//PF02513//PF07714//PF00067//PF11883//PF00954	Protein kinase domain//Lipopolysaccharide assembly protein A domain//Spin/Ssty Family//Protein tyrosine and serine/threonine kinase//Cytochrome P450//Domain of unknown function (DUF3403)//S-locus glycoprotein domain	GO:0009069//GO:0016310//GO:0048544//GO:0007276//GO:0006468//GO:0055114	serine family amino acid metabolic process//phosphorylation//recognition of pollen//gamete generation//protein phosphorylation//oxidation-reduction process	GO:0005506//GO:0005524//GO:0004674//GO:0016705//GO:0004672//GO:0020037	iron ion binding//ATP binding//protein serine/threonine kinase activity//oxidoreductase activity, acting on paired donors, with incorporation or reduction of molecular oxygen//protein kinase activity//heme binding	GO:0005887	integral component of plasma membrane	--	--	FALSE	1.33939	0.115765	FALSE	-1.23709	0.159239	FALSE	-0.00845592	1	UP	5.87596	2.66e-23	UP	4.5885	2.89e-17
Cluster-11149.19951	2.23	6.68	2.84	10.56	2.26	2056	1276262414	PIN19107.1	2229	5.1e-248	Cytochrome P450 CYP2 subfamily [Handroanthus impetiginosus]	XM_011076162.2	XM_011076162	801	0	PREDICTED: Sesamum indicum ent-kaurene oxidase, chloroplastic (LOC105159190), mRNA	K04122	GA3, CYP701	ent-kaurene oxidase	http://www.genome.jp/dbget-bin/www_bget?ko:K04122	Q93ZB2	1704	1.5e-188	Ent-kaurene oxidase, chloroplastic OS=Arabidopsis thaliana OX=3702 GN=KO PE=1 SV=2	PF00067	Cytochrome P450	GO:0055114	oxidation-reduction process	GO:0005506//GO:0020037//GO:0016705	iron ion binding//heme binding//oxidoreductase activity, acting on paired donors, with incorporation or reduction of molecular oxygen	--	--	--	--	FALSE	-0.458074	0.59231	UP	1.82451	0.000546774	FALSE	1.25565	0.0187849	DOWN	-1.57007	0.00400882	FALSE	0.204359	0.872766
Cluster-11149.12466	0	2.92	2.75	0.99	0.5	333	--	--	--	--	--	KP337741.1	KP337741	67	2.02e-24	Salvia miltiorrhiza cytochrome P450 CYP704A99 mRNA, complete cds	--	--	--	--	--	--	--	--	--	--	--	--	--	--	--	--	--	--	FALSE	1.78075	0.651408	FALSE	0.528852	1	FALSE	2.19114	0.28735	FALSE	-3.80692	0.806498	FALSE	-3.08254	1
Cluster-11149.14923	0.96	2.67	2.74	5.99	5.33	1702	1276254298	PIN12362.1	2026	1.5e-224	hypothetical protein CDL12_15015 [Handroanthus impetiginosus]	XM_011090021.2	XM_011090021	534	0	PREDICTED: Sesamum indicum allene oxide synthase 3-like (LOC105169595), mRNA	K01723	AOS	hydroperoxide dehydratase	http://www.genome.jp/dbget-bin/www_bget?ko:K01723	Q8GZP5	1614	3.3e-178	Allene oxide synthase 3 OS=Solanum lycopersicum OX=4081 GN=AOS3 PE=1 SV=1	PF00067	Cytochrome P450	GO:0055114	oxidation-reduction process	GO:0005506//GO:0020037//GO:0016705	iron ion binding//heme binding//oxidoreductase activity, acting on paired donors, with incorporation or reduction of molecular oxygen	--	--	--	--	FALSE	-0.962253	0.14934	FALSE	-0.229853	0.906029	FALSE	-1.30261	0.0165598	DOWN	-1.9597	0.00074173	DOWN	-2.23883	5.7e-05
Cluster-11149.4434	1.73	3.21	2.63	28.51	19.36	646	1276271721	PIN27094.1	626	1.2e-62	Cytochrome P450 CYP2 subfamily [Handroanthus impetiginosus]	--	--	--	--	--	-	-	-	http://www.genome.jp/dbget-bin/www_bget?ko:-	A6YIH8	230	3.8e-18	Premnaspirodiene oxygenase OS=Hyoscyamus muticus OX=35626 GN=CYP71D55 PE=1 SV=1	PF15060//PF00067	Differentiation and proliferation regulator//Cytochrome P450	GO:0030154//GO:0055114//GO:0007275	cell differentiation//oxidation-reduction process//multicellular organism development	GO:0016705//GO:0005506//GO:0020037	oxidoreductase activity, acting on paired donors, with incorporation or reduction of molecular oxygen//iron ion binding//heme binding	--	--	--	--	DOWN	-2.92849	1.23e-07	FALSE	0.15895	0.985467	DOWN	-2.87927	1.84e-07	DOWN	-3.3673	1.28e-08	DOWN	-3.25672	4.02e-08
Cluster-8937.0	0.41	1.18	2.62	0	1.32	356	1562642306	RXH82689.1	277	2e-22	hypothetical protein DVH24_003187 [Malus domestica]	--	--	--	--	--	-	-	-	http://www.genome.jp/dbget-bin/www_bget?ko:-	O81971	249	1.3e-20	Cytochrome P450 71D9 OS=Glycine max OX=3847 GN=CYP71D9 PE=2 SV=1	PF00067	Cytochrome P450	GO:0055114	oxidation-reduction process	GO:0020037//GO:0005506//GO:0016705	heme binding//iron ion binding//oxidoreductase activity, acting on paired donors, with incorporation or reduction of molecular oxygen	--	--	--	--	FALSE	4.77656	0.566119	FALSE	-4.99204	0.357601	FALSE	-0.389184	1	FALSE	3.51164	1	FALSE	-1.41246	0.843384
Cluster-15632.0	0.71	3.01	2.6	0.31	1.27	1626	747061168	XP_011077043.1	1565	4e-171	premnaspirodiene oxygenase-like [Sesamum indicum]	--	--	--	--	--	-	-	-	http://www.genome.jp/dbget-bin/www_bget?ko:-	O81971	1260	3.5e-137	Cytochrome P450 71D9 OS=Glycine max OX=3847 GN=CYP71D9 PE=2 SV=1	PF00067//PF05970	Cytochrome P450//PIF1-like helicase	GO:0006281//GO:0055114//GO:0000723	DNA repair//oxidation-reduction process//telomere maintenance	GO:0005506//GO:0020037//GO:0016705//GO:0003678	iron ion binding//heme binding//oxidoreductase activity, acting on paired donors, with incorporation or reduction of molecular oxygen//DNA helicase activity	GO:0005657	replication fork	--	--	UP	3.47877	2.24e-07	DOWN	-2.43329	0.0015005	FALSE	0.933844	0.146975	FALSE	1.8649	0.037683	FALSE	-0.61659	0.518101
Cluster-11149.5306	1.07	0.88	2.54	22.69	7.8	1992	747108163	XP_011069393.1	997	3.6e-105	geraniol 8-hydroxylase-like [Sesamum indicum]	--	--	--	--	--	-	-	-	http://www.genome.jp/dbget-bin/www_bget?ko:-	A0A4D6Q414	494	2.9e-48	Flavonoid 3',5'-hydroxylase CYP75B138 OS=Crocosmia x crocosmiiflora OX=1053288 GN=CYP75B138 PE=1 SV=1	PF00067	Cytochrome P450	GO:0055114	oxidation-reduction process	GO:0016705//GO:0005506//GO:0020037	oxidoreductase activity, acting on paired donors, with incorporation or reduction of molecular oxygen//iron ion binding//heme binding	--	--	--	--	DOWN	-4.47425	1.17e-16	FALSE	1.14321	0.0373203	DOWN	-3.44091	9.29e-11	DOWN	-3.73028	1.43e-12	DOWN	-2.63653	5.55e-07
Cluster-11149.4956	0.55	1.11	2.52	0	0	1564	1276262257	PIN18983.1	1875	4.3e-207	Cytochrome P450 CYP2 subfamily [Handroanthus impetiginosus]	--	--	--	--	--	-	-	-	http://www.genome.jp/dbget-bin/www_bget?ko:-	A0A068Q6L2	1226	3e-133	Cytochrome P450 736A117 OS=Prunus mume OX=102107 GN=CYP736A117 PE=2 SV=1	PF00067	Cytochrome P450	GO:0055114	oxidation-reduction process	GO:0016705//GO:0020037//GO:0005506	oxidoreductase activity, acting on paired donors, with incorporation or reduction of molecular oxygen//heme binding//iron ion binding	--	--	--	--	UP	8.18733	1.13e-06	FALSE	0	1	UP	7.92098	4.15e-06	UP	7.47485	0.000331033	UP	7.20323	0.000455599
Cluster-11149.15040	1.52	4.26	2.46	8.93	5.54	1833	747043791	XP_011085689.1	2171	2.4e-241	cytochrome P450 714C2 [Sesamum indicum]	XM_011087387.2	XM_011087387	878	0	PREDICTED: Sesamum indicum cytochrome P450 714C2 (LOC105167613), mRNA	-	-	-	http://www.genome.jp/dbget-bin/www_bget?ko:-	Q2QYH7	1361	7.7e-149	Cytochrome P450 714C2 OS=Oryza sativa subsp. japonica OX=39947 GN=CYP714C2 PE=2 SV=1	PF01258//PF00067	Prokaryotic dksA/traR C4-type zinc finger//Cytochrome P450	GO:0055114	oxidation-reduction process	GO:0005506//GO:0020037//GO:0008270//GO:0016705	iron ion binding//heme binding//zinc ion binding//oxidoreductase activity, acting on paired donors, with incorporation or reduction of molecular oxygen	--	--	--	--	FALSE	-0.866236	0.182527	FALSE	0.290806	0.801067	FALSE	-0.686072	0.25373	DOWN	-1.87407	0.000651863	DOWN	-1.63292	0.00288586
Cluster-11149.35892	0.39	3.43	2.46	8.2	43.99	805	747093271	XP_011094433.1	1092	1.4e-116	cytochrome P450 76A1-like [Sesamum indicum]	--	--	--	--	--	K20618	CYP76A	cytochrome P450 family 76 subfamily A	http://www.genome.jp/dbget-bin/www_bget?ko:K20618	W8JIS5	834	4.3e-88	Iridoid oxidase OS=Catharanthus roseus OX=4058 GN=IO PE=1 SV=1	PF00067	Cytochrome P450	GO:0055114	oxidation-reduction process	GO:0020037//GO:0005506//GO:0016705	heme binding//iron ion binding//oxidoreductase activity, acting on paired donors, with incorporation or reduction of molecular oxygen	--	--	--	--	FALSE	-1.04436	0.152909	DOWN	-2.81953	2.37e-08	DOWN	-3.97402	3.8e-14	DOWN	-3.72024	1.03e-06	DOWN	-6.58404	1.03e-22
Cluster-11149.23535	1.18	3.2	2.42	4.12	6.26	1858	922074197	ALA55537.1	1792	2.2e-197	cinnamate 4-hydroxylase [Sesamum indicum]	XM_011091227.2	XM_011091227	518	0	PREDICTED: Sesamum indicum trans-cinnamate 4-monooxygenase (LOC105170463), mRNA	K00487	CYP73A	trans-cinnamate 4-monooxygenase	http://www.genome.jp/dbget-bin/www_bget?ko:K00487	P48522	1779	2.6e-197	Trans-cinnamate 4-monooxygenase OS=Catharanthus roseus OX=4058 GN=CYP73A4 PE=2 SV=1	PF02060//PF00067	Slow voltage-gated potassium channel//Cytochrome P450	GO:0006811//GO:0055114//GO:0006813	ion transport//oxidation-reduction process//potassium ion transport	GO:0005506//GO:0016705//GO:0020037//GO:0005249	iron ion binding//oxidoreductase activity, acting on paired donors, with incorporation or reduction of molecular oxygen//heme binding//voltage-gated potassium channel activity	GO:0016020//GO:0008076	membrane//voltage-gated potassium channel complex	--	--	FALSE	-0.160199	1	FALSE	-0.99881	0.0963872	FALSE	-1.26961	0.0164325	FALSE	-1.12182	0.0932571	DOWN	-2.17007	5.34e-05
Cluster-11149.41471	2.01	1.59	2.41	2.97	4.91	2080	747089246	XP_011092252.1	2158	8.8e-240	cytochrome P450 710A11-like [Sesamum indicum]	XM_011086951.2	XM_011086951	838	0	PREDICTED: Sesamum indicum cytochrome P450 710A11 (LOC105167297), mRNA	-	-	-	http://www.genome.jp/dbget-bin/www_bget?ko:-	Q1T7C2	1894	1.4e-210	Cytochrome P450 710A11 OS=Solanum lycopersicum OX=4081 GN=CYP710A11 PE=1 SV=1	PF00067	Cytochrome P450	GO:0055114	oxidation-reduction process	GO:0005506//GO:0020037//GO:0016705	iron ion binding//heme binding//oxidoreductase activity, acting on paired donors, with incorporation or reduction of molecular oxygen	--	--	KOG0157	Cytochrome P450 CYP4/CYP19/CYP26 subfamilies	FALSE	-0.701967	0.388777	FALSE	-1.11992	0.0578491	DOWN	-1.93228	0.000240533	FALSE	0.110874	1	FALSE	-1.05879	0.061973
Cluster-11149.4016	0.58	0.62	2.35	5.05	0.7	2453	1276242097	PIN03103.1	1390	1.2e-150	Cytochrome P450 CYP2 subfamily [Handroanthus impetiginosus]	KM388825.1	KM388825	294	1.06e-149	Penstemon barbatus flavonoid 3'-hydroxylase (F3'H) mRNA, complete cds	K05280	E1.14.13.21	flavonoid 3'-monooxygenase	http://www.genome.jp/dbget-bin/www_bget?ko:K05280	Q9SBQ9	1271	2.8e-138	Flavonoid 3'-monooxygenase OS=Petunia hybrida OX=4102 GN=CYP75B2 PE=2 SV=1	PF00067	Cytochrome P450	GO:0055114	oxidation-reduction process	GO:0020037//GO:0005506//GO:0016705	heme binding//iron ion binding//oxidoreductase activity, acting on paired donors, with incorporation or reduction of molecular oxygen	--	--	--	--	DOWN	-2.82176	4.21e-07	UP	2.44633	1.06e-05	FALSE	-0.485434	0.636781	DOWN	-2.45445	1.17e-05	FALSE	-0.0581858	1
Cluster-11149.11322	3.6	1.83	2.27	1.55	1.19	1883	747090962	XP_011093193.1	1925	8.3e-213	cytochrome P450 704C1 isoform X1 [Sesamum indicum]	XM_011094891.2	XM_011094891	581	0	PREDICTED: Sesamum indicum cytochrome P450 704C1 (LOC105173213), transcript variant X1, mRNA	-	-	-	http://www.genome.jp/dbget-bin/www_bget?ko:-	Q50EK3	1272	1.7e-138	Cytochrome P450 704C1 OS=Pinus taeda OX=3352 GN=CYP704C1 PE=2 SV=1	PF00067	Cytochrome P450	GO:0055114	oxidation-reduction process	GO:0016705//GO:0005506//GO:0020037	oxidoreductase activity, acting on paired donors, with incorporation or reduction of molecular oxygen//iron ion binding//heme binding	--	--	--	--	FALSE	0.443614	0.749853	FALSE	-0.00958792	1	FALSE	0.323358	0.76532	UP	1.88853	0.000727314	UP	1.82853	0.00106677
Cluster-11149.8392	0.43	0.84	2.26	0.23	0.24	1712	1276262257	PIN18983.1	1736	6.2e-191	Cytochrome P450 CYP2 subfamily [Handroanthus impetiginosus]	--	--	--	--	--	K07418	CYP2J	cytochrome P450 family 2 subfamily J	http://www.genome.jp/dbget-bin/www_bget?ko:K07418	A0A068Q6L2	1186	1.4e-128	Cytochrome P450 736A117 OS=Prunus mume OX=102107 GN=CYP736A117 PE=2 SV=1	PF00067	Cytochrome P450	GO:0055114	oxidation-reduction process	GO:0020037//GO:0005506//GO:0016705	heme binding//iron ion binding//oxidoreductase activity, acting on paired donors, with incorporation or reduction of molecular oxygen	--	--	--	--	FALSE	2.05272	0.0263893	FALSE	-0.418162	1	FALSE	1.52258	0.0902305	FALSE	1.5679	0.203328	FALSE	1.09871	0.317297
Cluster-11149.14955	1.1	1.9	2.22	2.5	1.17	1063	1276241953	PIN02996.1	138	7.7e-06	Cytochrome P450 CYP4/CYP19/CYP26 subfamily [Handroanthus impetiginosus]	XM_011084666.2	XM_011084666	39	2.55e-08	PREDICTED: Sesamum indicum cytochrome P450 CYP72A219-like (LOC105165603), mRNA	--	--	--	--	--	--	--	--	--	--	--	--	--	--	--	--	--	--	FALSE	-0.191188	1	FALSE	0.6982	0.517985	FALSE	0.396545	0.717525	FALSE	-0.517559	0.767727	FALSE	0.130558	1
Cluster-11149.12334	0.93	2.12	2.21	2.9	0.44	1806	1276234679	PIM98437.1	2055	6.7e-228	Cytochrome P450 CYP4/CYP19/CYP26 subfamily [Handroanthus impetiginosus]	XM_020698209.1	XM_020698209	418	0	PREDICTED: Sesamum indicum alkane hydroxylase MAH1-like (LOC105175175), mRNA	-	-	-	http://www.genome.jp/dbget-bin/www_bget?ko:-	Q9FVS9	1053	3.9e-113	Alkane hydroxylase MAH1 OS=Arabidopsis thaliana OX=3702 GN=CYP96A15 PE=2 SV=1	PF00067	Cytochrome P450	GO:0055114	oxidation-reduction process	GO:0020037//GO:0005506//GO:0016705	heme binding//iron ion binding//oxidoreductase activity, acting on paired donors, with incorporation or reduction of molecular oxygen	--	--	--	--	FALSE	-0.248393	0.936307	UP	2.30916	0.000334225	UP	1.94975	0.00274705	FALSE	-0.97272	0.201303	FALSE	1.28499	0.112843
Cluster-11149.15069	4.77	7.33	2.12	9.39	13.94	1997	747102372	XP_011099350.1	1926	6.7e-213	cytochrome P450 81E8-like [Sesamum indicum]	XM_012998303.1	XM_012998303	404	0	PREDICTED: Erythranthe guttatus cytochrome P450 81D11-like (LOC105973280), transcript variant X1, mRNA	-	-	-	http://www.genome.jp/dbget-bin/www_bget?ko:-	W8JMU7	1600	1.6e-176	Cytochrome P450 81Q32 OS=Catharanthus roseus OX=4058 GN=CYP81Q32 PE=2 SV=1	PF00067	Cytochrome P450	GO:0055114	oxidation-reduction process	GO:0020037//GO:0005506//GO:0016705	heme binding//iron ion binding//oxidoreductase activity, acting on paired donors, with incorporation or reduction of molecular oxygen	--	--	--	--	FALSE	-0.154784	1	FALSE	-0.965421	0.092592	FALSE	-1.23092	0.0146451	FALSE	-0.302157	0.806498	FALSE	-1.31747	0.00984351
Cluster-11149.8310	3.04	1.33	2.08	2.86	2.66	1077	848900826	XP_012850588.1	328	7.2e-28	PREDICTED: cytochrome P450 CYP72A219-like [Erythranthe guttata]	XM_012995161.1	XM_012995161	116	4.06e-51	PREDICTED: Erythranthe guttatus cytochrome P450 CYP72A219-like (LOC105970353), mRNA	-	-	-	http://www.genome.jp/dbget-bin/www_bget?ko:-	U5NE19	278	1.7e-23	7-deoxyloganic acid hydroxylase OS=Catharanthus roseus OX=4058 GN=7DLH PE=1 SV=1	PF00067	Cytochrome P450	GO:0055114	oxidation-reduction process	GO:0005506//GO:0020037//GO:0016705	iron ion binding//heme binding//oxidoreductase activity, acting on paired donors, with incorporation or reduction of molecular oxygen	--	--	--	--	FALSE	-0.896558	0.357705	FALSE	-0.289331	0.875047	FALSE	-1.29571	0.0477346	FALSE	0.752962	0.369361	FALSE	0.413619	0.651737
Cluster-11149.42507	2.15	0.86	2.05	18.62	23.49	2410	747100142	XP_011098148.1	1488	5e-162	cytochrome P450 CYP72A219-like [Sesamum indicum]	XM_011099846.2	XM_011099846	509	0	PREDICTED: Sesamum indicum cytochrome P450 CYP72A219-like (LOC105176902), mRNA	-	-	-	http://www.genome.jp/dbget-bin/www_bget?ko:-	H2DH21	1002	4.3e-107	Cytochrome P450 CYP72A219 OS=Panax ginseng OX=4054 PE=2 SV=1	PF00643//PF00067	B-box zinc finger//Cytochrome P450	GO:0055114	oxidation-reduction process	GO:0020037//GO:0005506//GO:0008270//GO:0016705	heme binding//iron ion binding//zinc ion binding//oxidoreductase activity, acting on paired donors, with incorporation or reduction of molecular oxygen	--	--	--	--	DOWN	-4.23793	1.72e-15	FALSE	-0.731312	0.245225	DOWN	-5.07925	4.55e-21	DOWN	-2.43617	1.28e-06	DOWN	-3.21725	7.19e-11
Cluster-11149.42722	0	1.03	1.97	0	0	373	--	--	--	--	--	XM_011073901.2	XM_011073901	92	2.91e-38	PREDICTED: Sesamum indicum cytochrome P450 87A3 (LOC105157494), mRNA	--	--	--	--	--	--	--	--	--	--	--	--	--	--	--	--	--	--	FALSE	4.77656	0.566119	FALSE	0	1	FALSE	4.51988	0.441562	FALSE	0	1	FALSE	0	1
Cluster-4780.1	0	0	1.93	2.09	0.53	328	848917001	XP_012855987.1	422	2.8e-39	PREDICTED: cytochrome P450 71D10-like [Erythranthe guttata]	MF363004.1	MF363004	82	9.13e-33	Scutellaria baicalensis cytochrome P450 CYP71D1 mRNA, complete cds; chromoplast	-	-	-	http://www.genome.jp/dbget-bin/www_bget?ko:-	P93530	323	3.2e-29	Cytochrome P450 71D6 OS=Solanum chacoense OX=4108 GN=CYP71D6 PE=2 SV=1	PF00067	Cytochrome P450	GO:0055114	oxidation-reduction process	GO:0005506//GO:0020037//GO:0016705	iron ion binding//heme binding//oxidoreductase activity, acting on paired donors, with incorporation or reduction of molecular oxygen	--	--	--	--	FALSE	-4.92245	0.380656	FALSE	1.47981	0.70386	FALSE	-3.29695	1	FALSE	-4.75444	0.557126	FALSE	-3.08254	1
Cluster-11149.41887	0.96	2.65	1.88	3.67	4.04	2442	747049474	XP_011070785.1	720	5.8e-73	uncharacterized protein LOC105156369 [Sesamum indicum]	XM_011072483.2	XM_011072483	398	0	PREDICTED: Sesamum indicum uncharacterized LOC105156369 (LOC105156369), mRNA	-	-	-	http://www.genome.jp/dbget-bin/www_bget?ko:-	Q9FG65	340	2.5e-30	Cytochrome P450 81D1 OS=Arabidopsis thaliana OX=3702 GN=CYP81D1 PE=2 SV=1	PF00067	Cytochrome P450	GO:0055114	oxidation-reduction process	GO:0020037//GO:0005506//GO:0016705	heme binding//iron ion binding//oxidoreductase activity, acting on paired donors, with incorporation or reduction of molecular oxygen	--	--	--	--	FALSE	-0.268914	0.895622	FALSE	-0.533386	0.513672	FALSE	-0.912928	0.102657	FALSE	-1.25268	0.0424893	DOWN	-1.83561	0.000695485
Cluster-11149.20840	3.19	5.1	1.86	4.48	24.86	2003	70724314	AAZ07706.1	2158	8.5e-240	cytochrome P450 monooxygenase [Sesamum indicum]	XM_023021527.1	XM_023021527	227	1.52e-112	PREDICTED: Olea europaea var. sylvestris cytochrome P450 CYP72A219-like (LOC111395507), transcript variant X3, mRNA	-	-	-	http://www.genome.jp/dbget-bin/www_bget?ko:-	H2DH21	1757	1e-194	Cytochrome P450 CYP72A219 OS=Panax ginseng OX=4054 PE=2 SV=1	PF00067	Cytochrome P450	GO:0055114	oxidation-reduction process	GO:0020037//GO:0005506//GO:0016705	heme binding//iron ion binding//oxidoreductase activity, acting on paired donors, with incorporation or reduction of molecular oxygen	--	--	--	--	FALSE	0.389837	0.741373	DOWN	-2.86895	6.62e-09	DOWN	-2.58979	7.16e-08	FALSE	0.184377	0.999143	DOWN	-2.73432	2.07e-08
Cluster-16729.0	4.56	2.15	1.83	3.46	1	1578	747104194	XP_011100321.1	1686	3.6e-185	cytochrome P450 81D1-like [Sesamum indicum]	XM_012983313.1	XM_012983313	77	2.88e-29	PREDICTED: Erythranthe guttatus cytochrome P450 81E8-like (LOC105959254), mRNA	-	-	-	http://www.genome.jp/dbget-bin/www_bget?ko:-	W8JMU7	945	1.1e-100	Cytochrome P450 81Q32 OS=Catharanthus roseus OX=4058 GN=CYP81Q32 PE=2 SV=1	PF03099//PF00067	Biotin/lipoate A/B protein ligase family//Cytochrome P450	GO:0006464//GO:0055114	cellular protein modification process//oxidation-reduction process	GO:0016705//GO:0005506//GO:0020037	oxidoreductase activity, acting on paired donors, with incorporation or reduction of molecular oxygen//iron ion binding//heme binding	--	--	--	--	FALSE	-0.481192	0.635486	FALSE	1.38628	0.0315098	FALSE	0.794419	0.273386	FALSE	1.06991	0.0842813	UP	2.40526	1.44e-05
Cluster-11149.32407	0.43	1.39	1.83	0.07	1.29	850	604306650	EYU25446.1	975	5.4e-103	hypothetical protein MIMGU_mgv1a005044mg [Erythranthe guttata]	XM_023034044.1	XM_023034044	238	4.82e-119	PREDICTED: Olea europaea var. sylvestris ferruginol synthase-like (LOC111405241), mRNA	-	-	-	http://www.genome.jp/dbget-bin/www_bget?ko:-	W8JMV1	786	1.7e-82	Cytochrome P450 76T24 OS=Catharanthus roseus OX=4058 GN=CYP76T24 PE=2 SV=1	PF00067	Cytochrome P450	GO:0055114	oxidation-reduction process	GO:0005506//GO:0020037//GO:0016705	iron ion binding//heme binding//oxidoreductase activity, acting on paired donors, with incorporation or reduction of molecular oxygen	--	--	--	--	UP	4.33597	0.00237581	DOWN	-4.40994	0.00213389	FALSE	-0.192225	0.977867	FALSE	3.08066	0.272497	FALSE	-1.36336	0.2679
Cluster-11149.40889	1.71	2.47	1.81	1.45	7.37	2054	747072503	XP_011083167.1	1955	3e-216	3-epi-6-deoxocathasterone 23-monooxygenase [Sesamum indicum]	XM_011084865.2	XM_011084865	779	0	PREDICTED: Sesamum indicum 3-epi-6-deoxocathasterone 23-monooxygenase (LOC105165748), mRNA	-	-	-	http://www.genome.jp/dbget-bin/www_bget?ko:-	Q9M066	1497	1.5e-164	3-epi-6-deoxocathasterone 23-monooxygenase CYP90C1 OS=Arabidopsis thaliana OX=3702 GN=CYP90C1 PE=1 SV=3	PF00067	Cytochrome P450	GO:0055114	oxidation-reduction process	GO:0020037//GO:0005506//GO:0016705	heme binding//iron ion binding//oxidoreductase activity, acting on paired donors, with incorporation or reduction of molecular oxygen	--	--	--	--	FALSE	0.966376	0.169026	DOWN	-2.73894	1.85e-07	DOWN	-1.88321	0.000186389	FALSE	0.913235	0.200103	DOWN	-1.8752	0.00031132
Cluster-11149.5208	0.68	0.11	1.8	4.23	11.65	1867	1173820758	XP_011088865.2	1802	1.5e-198	LOW QUALITY PROTEIN: cytochrome P450 94C1 [Sesamum indicum]	XM_031239473.1	XM_031239473	99	2.02e-41	PREDICTED: Ipomoea triloba cytochrome P450 94C1-like (LOC115999630), mRNA	-	-	-	http://www.genome.jp/dbget-bin/www_bget?ko:-	Q9ZUX1	1454	1.3e-159	Cytochrome P450 94C1 OS=Arabidopsis thaliana OX=3702 GN=CYP94C1 PE=1 SV=1	PF00067	Cytochrome P450	GO:0055114	oxidation-reduction process	GO:0020037//GO:0005506//GO:0016705	heme binding//iron ion binding//oxidoreductase activity, acting on paired donors, with incorporation or reduction of molecular oxygen	--	--	--	--	DOWN	-5.03675	5.63e-12	DOWN	-1.85866	0.000307666	DOWN	-6.99819	4.84e-24	DOWN	-1.95617	0.00122739	DOWN	-3.86373	1.15e-12
Cluster-11149.39146	1.17	1.45	1.78	17.97	195.3	1767	747070241	XP_011081932.1	1942	8.3e-215	cytochrome P450 71D95-like [Sesamum indicum]	XM_011083630.2	XM_011083630	652	0	PREDICTED: Sesamum indicum cytochrome P450 71D95-like (LOC105164836), mRNA	-	-	-	http://www.genome.jp/dbget-bin/www_bget?ko:-	Q6WKY9	1565	1.6e-172	Cytochrome P450 71D95 OS=Mentha gracilis OX=241069 GN=CYP71D95 PE=1 SV=1	PF00067	Cytochrome P450	GO:0055114	oxidation-reduction process	GO:0016705//GO:0020037//GO:0005506	oxidoreductase activity, acting on paired donors, with incorporation or reduction of molecular oxygen//heme binding//iron ion binding	--	--	--	--	DOWN	-3.42465	5.15e-11	DOWN	-3.83841	9.39e-15	DOWN	-7.3732	2.82e-37	DOWN	-3.26083	6.35e-10	DOWN	-7.14855	2.35e-35
Cluster-11149.20733	2.14	1.9	1.77	4.27	15.6	1849	1502082138	BBG80454.1	2087	1.3e-231	cytochrome P450 716C53 [Avicennia marina]	XM_011098436.2	XM_011098436	593	0	PREDICTED: Sesamum indicum beta-amyrin 28-oxidase (LOC105175834), mRNA	K20667	CYP716A	beta-amyrin 28-monooxygenase	http://www.genome.jp/dbget-bin/www_bget?ko:K20667	F6H9N6	1181	5.8e-128	Beta-amyrin 28-monooxygenase OS=Vitis vinifera OX=29760 GN=CYP716A15 PE=1 SV=1	PF05829//PF00067	Adenovirus late L2 mu core protein (Protein X)//Cytochrome P450	GO:0055114	oxidation-reduction process	GO:0005506//GO:0003677//GO:0020037//GO:0016705	iron ion binding//DNA binding//heme binding//oxidoreductase activity, acting on paired donors, with incorporation or reduction of molecular oxygen	GO:0019013	viral nucleocapsid	--	--	FALSE	-0.966257	0.158449	DOWN	-2.26367	6.36e-06	DOWN	-3.34031	3.62e-11	FALSE	-0.320374	0.806498	DOWN	-2.63367	1.29e-07
Cluster-11149.47050	1.86	0.2	1.71	2.55	21.23	1774	1276242211	PIN03182.1	2042	2.1e-226	Cytochrome P450 CYP4/CYP19/CYP26 subfamily [Handroanthus impetiginosus]	XM_011092791.2	XM_011092791	281	1.28e-142	PREDICTED: Sesamum indicum secologanin synthase-like (LOC105171626), mRNA	-	-	-	http://www.genome.jp/dbget-bin/www_bget?ko:-	H2DH21	1227	2.6e-133	Cytochrome P450 CYP72A219 OS=Panax ginseng OX=4054 PE=2 SV=1	PF00067//PF04062	Cytochrome P450//ARP2/3 complex ARPC3 (21 kDa) subunit	GO:0030833//GO:0034314//GO:0055114	regulation of actin filament polymerization//Arp2/3 complex-mediated actin nucleation//oxidation-reduction process	GO:0005506//GO:0020037//GO:0016705	iron ion binding//heme binding//oxidoreductase activity, acting on paired donors, with incorporation or reduction of molecular oxygen	GO:0005885//GO:0005856	Arp2/3 protein complex//cytoskeleton	--	--	DOWN	-3.43121	1.26e-06	DOWN	-3.45364	1.13e-11	DOWN	-6.99107	4.16e-27	FALSE	0.221469	0.97444	DOWN	-3.28163	7.45e-11
Cluster-11149.22404	10.6	19.56	1.67	14.64	125.64	1855	747045757	XP_011095827.1	1789	4.8e-197	flavonoid 3'-monooxygenase-like [Sesamum indicum]	XM_012999283.1	XM_012999283	176	3.14e-84	PREDICTED: Erythranthe guttatus flavonoid 3'-monooxygenase-like (LOC105974218), mRNA	-	-	-	http://www.genome.jp/dbget-bin/www_bget?ko:-	A0A1D6F9Y9	1061	4.8e-114	Trimethyltridecatetraene synthase OS=Zea mays OX=4577 GN=CYP92C6 PE=1 SV=1	PF00067//PF08054	Cytochrome P450//Leucine operon leader peptide	GO:0009098//GO:0055114	leucine biosynthetic process//oxidation-reduction process	GO:0016705//GO:0020037//GO:0005506	oxidoreductase activity, acting on paired donors, with incorporation or reduction of molecular oxygen//heme binding//iron ion binding	--	--	--	--	FALSE	0.620072	0.382977	DOWN	-3.49729	9.98e-13	DOWN	-2.98798	2.71e-10	FALSE	0.208749	0.931203	DOWN	-3.33846	3.75e-12
Cluster-11149.39794	1.31	1.78	1.63	19.83	11.62	1608	604312769	EYU26263.1	965	1.5e-101	hypothetical protein MIMGU_mgv1a019274mg [Erythranthe guttata]	XM_020698839.1	XM_020698839	66	3.83e-23	PREDICTED: Sesamum indicum cytochrome P450 CYP72A219-like (LOC105176903), mRNA	-	-	-	http://www.genome.jp/dbget-bin/www_bget?ko:-	Q2MJ21	596	3.4e-60	Cytochrome P450 716A67 OS=Medicago truncatula OX=3880 GN=CYP72A67 PE=2 SV=1	PF00067	Cytochrome P450	GO:0055114	oxidation-reduction process	GO:0016705//GO:0005506//GO:0020037	oxidoreductase activity, acting on paired donors, with incorporation or reduction of molecular oxygen//iron ion binding//heme binding	--	--	--	--	DOWN	-3.26923	3.22e-10	FALSE	0.373806	0.693363	DOWN	-3.00564	4.08e-09	DOWN	-3.24261	8.15e-10	DOWN	-2.91821	2.91e-08
Cluster-11149.38382	4.37	3.16	1.62	1.1	6.15	403	1276243540	PIN04155.1	359	6.8e-32	Cytochrome P450 CYP2 subfamily [Handroanthus impetiginosus]	--	--	--	--	--	-	-	-	http://www.genome.jp/dbget-bin/www_bget?ko:-	O65782	209	6.4e-16	Cytochrome P450 83B1 OS=Arabidopsis thaliana OX=3702 GN=CYP83B1 PE=1 SV=1	PF00067	Cytochrome P450	GO:0055114	oxidation-reduction process	GO:0020037//GO:0005506//GO:0016705	heme binding//iron ion binding//oxidoreductase activity, acting on paired donors, with incorporation or reduction of molecular oxygen	--	--	--	--	FALSE	1.732	0.36331	DOWN	-2.83572	0.00458654	FALSE	-1.21441	0.177888	FALSE	2.5833	0.0276755	FALSE	-0.298645	0.991507
Cluster-11149.12047	3.1	2.75	1.47	14.09	19.27	1724	747051778	XP_011071981.1	2011	8.1e-223	cytochrome P450 71A8-like [Sesamum indicum]	XM_011073679.2	XM_011073679	722	0	PREDICTED: Sesamum indicum cytochrome P450 71A8-like (LOC105157300), mRNA	K07418	CYP2J	cytochrome P450 family 2 subfamily J	http://www.genome.jp/dbget-bin/www_bget?ko:K07418	Q42716	1626	1.4e-179	Cytochrome P450 71A8 OS=Mentha piperita OX=34256 GN=CYP71A8 PE=3 SV=1	PF00067	Cytochrome P450	GO:0055114	oxidation-reduction process	GO:0016705//GO:0020037//GO:0005506	oxidoreductase activity, acting on paired donors, with incorporation or reduction of molecular oxygen//heme binding//iron ion binding	--	--	--	--	DOWN	-2.15366	3.07e-05	FALSE	-0.848531	0.155701	DOWN	-3.11265	3.58e-10	FALSE	-1.50751	0.0054472	DOWN	-2.40581	1.05e-06
Cluster-11149.35023	3.95	3.62	1.45	3.06	7.6	1891	747106664	XP_011101634.1	2229	4.7e-248	cytochrome P450 87A3-like [Sesamum indicum]	XM_011103332.2	XM_011103332	799	0	PREDICTED: Sesamum indicum cytochrome P450 87A3-like (LOC105179681), mRNA	-	-	-	http://www.genome.jp/dbget-bin/www_bget?ko:-	Q7XU38	1120	7e-121	Cytochrome P450 87A3 OS=Oryza sativa subsp. japonica OX=39947 GN=CYP87A3 PE=2 SV=3	PF00067//PF05992	Cytochrome P450//SbmA/BacA-like family	GO:0015833//GO:0055114	peptide transport//oxidation-reduction process	GO:0005506//GO:1904680//GO:0020037//GO:0016705	iron ion binding//peptide transmembrane transporter activity//heme binding//oxidoreductase activity, acting on paired donors, with incorporation or reduction of molecular oxygen	GO:0016021	integral component of membrane	--	--	FALSE	0.445469	0.651408	DOWN	-1.70853	0.00133792	FALSE	-1.37372	0.00775258	FALSE	1.0409	0.0934958	FALSE	-0.717464	0.22134
Cluster-11149.11401	3.02	3.42	1.41	44.98	378.03	1629	848871008	XP_012836085.1	1985	7.9e-220	PREDICTED: uncharacterized protein LOC105956739 [Erythranthe guttata]	--	--	--	--	--	K20618	CYP76A	cytochrome P450 family 76 subfamily A	http://www.genome.jp/dbget-bin/www_bget?ko:K20618	W8JIS5	1470	1.6e-161	Iridoid oxidase OS=Catharanthus roseus OX=4058 GN=IO PE=1 SV=1	PF00067//PF10716//PF11770	Cytochrome P450//NADH dehydrogenase transmembrane subunit//GRB2-binding adapter (GAPT)	GO:0055114//GO:0006118	oxidation-reduction process//obsolete electron transport	GO:0016655//GO:0016705//GO:0020037//GO:0005506	oxidoreductase activity, acting on NAD(P)H, quinone or similar compound as acceptor//oxidoreductase activity, acting on paired donors, with incorporation or reduction of molecular oxygen//heme binding//iron ion binding	GO:0016021	integral component of membrane	--	--	DOWN	-3.51448	2.78e-12	DOWN	-3.4676	1.04e-12	DOWN	-7.09256	1.87e-36	DOWN	-3.22424	1.28e-10	DOWN	-6.74154	6.93e-34
Cluster-11149.39677	0.59	1.44	1.39	1.71	1.45	398	1276243422	PIN04070.1	137	3.7e-06	Cytochrome P450 CYP2 subfamily [Handroanthus impetiginosus]	--	--	--	--	--	-	-	-	http://www.genome.jp/dbget-bin/www_bget?ko:-	O48956	122	7.8e-06	Cytochrome P450 98A1 OS=Sorghum bicolor OX=4558 GN=CYP98A1 PE=2 SV=1	--	--	--	--	--	--	--	--	--	--	FALSE	0.000856135	1	FALSE	-0.158044	1	FALSE	-0.264919	1	FALSE	-0.874505	1	FALSE	-1.07397	0.717726
Cluster-11149.5541	0.2	0.76	1.38	2.11	3.9	1750	848856052	XP_012854791.1	2365	7.4e-264	PREDICTED: cytokinin hydroxylase [Erythranthe guttata]	XM_011101256.2	XM_011101256	745	0	PREDICTED: Sesamum indicum cytokinin hydroxylase (LOC105177944), mRNA	K10717	CYP735A	cytokinin trans-hydroxylase	http://www.genome.jp/dbget-bin/www_bget?ko:K10717	Q9FF18	1952	2.2e-217	Cytokinin hydroxylase OS=Arabidopsis thaliana OX=3702 GN=CYP735A1 PE=1 SV=1	PF00067	Cytochrome P450	GO:0055114	oxidation-reduction process	GO:0016705//GO:0020037//GO:0005506	oxidoreductase activity, acting on paired donors, with incorporation or reduction of molecular oxygen//heme binding//iron ion binding	--	--	--	--	FALSE	-1.2608	0.0929043	FALSE	-1.28167	0.032234	DOWN	-2.65218	2.48e-06	DOWN	-2.72546	0.000385764	DOWN	-4.05316	1.48e-09
Cluster-11149.8306	1.32	2.01	1.32	39.75	20.3	1149	848900826	XP_012850588.1	594	1.1e-58	PREDICTED: cytochrome P450 CYP72A219-like [Erythranthe guttata]	XM_012995087.1	XM_012995087	175	6.92e-84	PREDICTED: Erythranthe guttatus cytochrome P450 CYP72A219-like (LOC105970276), mRNA	-	-	-	http://www.genome.jp/dbget-bin/www_bget?ko:-	H2DH21	446	6.1e-43	Cytochrome P450 CYP72A219 OS=Panax ginseng OX=4054 PE=2 SV=1	PF00067	Cytochrome P450	GO:0055114	oxidation-reduction process	GO:0016705//GO:0020037//GO:0005506	oxidoreductase activity, acting on paired donors, with incorporation or reduction of molecular oxygen//heme binding//iron ion binding	--	--	--	--	DOWN	-4.09777	1.47e-14	FALSE	0.572282	0.416557	DOWN	-3.6355	4.86e-12	DOWN	-4.23167	8.29e-15	DOWN	-3.70845	9.18e-12
Cluster-11149.35894	0.68	1.04	1.31	7.37	29.52	945	747093271	XP_011094433.1	1005	2e-106	cytochrome P450 76A1-like [Sesamum indicum]	XM_011096131.2	XM_011096131	291	1.86e-148	PREDICTED: Sesamum indicum cytochrome P450 76A1-like (LOC105174132), mRNA	K20618	CYP76A	cytochrome P450 family 76 subfamily A	http://www.genome.jp/dbget-bin/www_bget?ko:K20618	W8JIS5	654	3.8e-67	Iridoid oxidase OS=Catharanthus roseus OX=4058 GN=IO PE=1 SV=1	PF00067	Cytochrome P450	GO:0055114	oxidation-reduction process	GO:0016705//GO:0020037//GO:0005506	oxidoreductase activity, acting on paired donors, with incorporation or reduction of molecular oxygen//heme binding//iron ion binding	--	--	--	--	DOWN	-2.60217	4.23e-05	DOWN	-2.39794	2.25e-06	DOWN	-5.10899	7.02e-19	DOWN	-2.76931	2.84e-05	DOWN	-5.21462	3.99e-18
Cluster-11149.7872	2.44	0.19	1.3	5.61	13.37	2283	1173792723	XP_011078182.2	1680	2.6e-184	beta-amyrin 28-oxidase [Sesamum indicum]	JQ958968.1	JQ958968	463	0	Ocimum basilicum isolate ObCYP2 cytochrome P450 mRNA, complete cds	K20667	CYP716A	beta-amyrin 28-monooxygenase	http://www.genome.jp/dbget-bin/www_bget?ko:K20667	I7C6E8	1440	6.6e-158	Beta-amyrin 28-monooxygenase OS=Panax ginseng OX=4054 GN=CYP716A52v2 PE=1 SV=1	PF00067	Cytochrome P450	GO:0055114	oxidation-reduction process	GO:0020037//GO:0005506//GO:0016705	heme binding//iron ion binding//oxidoreductase activity, acting on paired donors, with incorporation or reduction of molecular oxygen	--	--	--	--	DOWN	-4.62807	1.37e-13	DOWN	-1.64889	0.00135371	DOWN	-6.38414	2.96e-24	FALSE	-0.527165	0.54395	DOWN	-2.22582	6.53e-06
Cluster-11149.6982	3.12	1.95	1.29	7.57	3.87	1717	747102319	XP_011099321.1	1789	4.5e-197	cytochrome P450 81D1-like [Sesamum indicum]	XM_012974541.1	XM_012974541	165	3.79e-78	PREDICTED: Erythranthe guttatus cytochrome P450 81F1-like (LOC105951153), mRNA	-	-	-	http://www.genome.jp/dbget-bin/www_bget?ko:-	W8JMU7	1402	1.3e-153	Cytochrome P450 81Q32 OS=Catharanthus roseus OX=4058 GN=CYP81Q32 PE=2 SV=1	PF00067	Cytochrome P450	GO:0055114	oxidation-reduction process	GO:0016705//GO:0005506//GO:0020037	oxidoreductase activity, acting on paired donors, with incorporation or reduction of molecular oxygen//iron ion binding//heme binding	--	--	--	--	DOWN	-1.75087	0.00168103	FALSE	0.569496	0.4623	FALSE	-1.29175	0.0216271	FALSE	-0.604307	0.433377	FALSE	-0.0847902	1
Cluster-11149.39230	2.25	2.33	1.29	4	6.39	1684	1276247167	PIN06835.1	2294	1.2e-255	Cytochrome P450 CYP3/CYP5/CYP6/CYP9 subfamily [Handroanthus impetiginosus]	XM_011083921.2	XM_011083921	796	0	PREDICTED: Sesamum indicum cytochrome P450 711A1 (LOC105165045), transcript variant X2, mRNA	K20771	CYP711A1	carlactone C-19 oxidase	http://www.genome.jp/dbget-bin/www_bget?ko:K20771	B9DFU2	1872	4e-208	Cytochrome P450 711A1 OS=Arabidopsis thaliana OX=3702 GN=CYP711A1 PE=2 SV=1	PF00067	Cytochrome P450	GO:0055114	oxidation-reduction process	GO:0016705//GO:0020037//GO:0005506	oxidoreductase activity, acting on paired donors, with incorporation or reduction of molecular oxygen//heme binding//iron ion binding	--	--	KOG0158	Cytochrome P450 CYP3/CYP5/CYP6/CYP9 subfamilies	FALSE	-0.574917	0.525262	FALSE	-1.07164	0.0724969	DOWN	-1.75702	0.000836966	FALSE	-0.160059	1	FALSE	-1.2814	0.0199865
Cluster-11149.44741	0.55	0.42	1.24	18.94	20.58	2462	1278993852	XP_022851176.1	785	1.7e-80	geraniol 8-hydroxylase-like [Olea europaea var. sylvestris]	--	--	--	--	--	-	-	-	http://www.genome.jp/dbget-bin/www_bget?ko:-	Q8VWZ7	600	1.8e-60	geraniol 8-hydroxylase OS=Catharanthus roseus OX=4058 GN=CYP76B6 PE=1 SV=1	PF00067	Cytochrome P450	GO:0055114	oxidation-reduction process	GO:0016705//GO:0005506//GO:0020037	oxidoreductase activity, acting on paired donors, with incorporation or reduction of molecular oxygen//iron ion binding//heme binding	--	--	--	--	DOWN	-5.29329	1.56e-20	FALSE	-0.515943	0.485866	DOWN	-5.91846	1.03e-24	DOWN	-4.41529	6.76e-16	DOWN	-4.98027	1.22e-19
Cluster-11149.42161	3.19	4.87	1.24	33.51	227.57	600	747093271	XP_011094433.1	379	4.9e-34	cytochrome P450 76A1-like [Sesamum indicum]	--	--	--	--	--	-	-	-	http://www.genome.jp/dbget-bin/www_bget?ko:-	W8JIS5	321	9.9e-29	Iridoid oxidase OS=Catharanthus roseus OX=4058 GN=IO PE=1 SV=1	PF00067//PF08715	Cytochrome P450//Coronavirus papain-like peptidase	GO:0055114//GO:0006508	oxidation-reduction process//proteolysis	GO:0005506//GO:0016740//GO:0016705//GO:0004197//GO:0020037//GO:0008242	iron ion binding//transferase activity//oxidoreductase activity, acting on paired donors, with incorporation or reduction of molecular oxygen//cysteine-type endopeptidase activity//heme binding//omega peptidase activity	--	--	--	--	DOWN	-2.55756	2.66e-06	DOWN	-3.16262	1.2e-10	DOWN	-5.83015	5.45e-26	DOWN	-2.72611	1.22e-06	DOWN	-5.9376	7.03e-26
Cluster-11149.45618	0.37	0.76	1.21	32.94	36.33	829	747040459	XP_011082374.1	928	1.5e-97	premnaspirodiene oxygenase [Sesamum indicum]	XM_027313835.1	XM_027313835	41	1.53e-09	PREDICTED: Coffea eugenioides premnaspirodiene oxygenase-like (LOC113769380), mRNA	-	-	-	http://www.genome.jp/dbget-bin/www_bget?ko:-	Q6WKY9	593	4e-60	Cytochrome P450 71D95 OS=Mentha gracilis OX=241069 GN=CYP71D95 PE=1 SV=1	PF00067	Cytochrome P450	GO:0055114	oxidation-reduction process	GO:0020037//GO:0005506//GO:0016705	heme binding//iron ion binding//oxidoreductase activity, acting on paired donors, with incorporation or reduction of molecular oxygen	--	--	--	--	DOWN	-5.21167	3.66e-17	FALSE	-0.539984	0.469352	DOWN	-5.85918	2.87e-21	DOWN	-5.78518	9.96e-18	DOWN	-6.36955	2.48e-21
Cluster-11149.9703	2.23	1.63	1.19	2.6	4.77	2486	1276271219	PIN26646.1	1106	1e-117	Cytochrome P450 CYP4/CYP19/CYP26 subfamily [Handroanthus impetiginosus]	XM_011078001.2	XM_011078001	379	0	PREDICTED: Sesamum indicum cytochrome P450 704C1 (LOC105160566), mRNA	-	-	-	http://www.genome.jp/dbget-bin/www_bget?ko:-	Q50EK3	673	6.3e-69	Cytochrome P450 704C1 OS=Pinus taeda OX=3352 GN=CYP704C1 PE=2 SV=1	PF00067	Cytochrome P450	GO:0055114	oxidation-reduction process	GO:0016705//GO:0020037//GO:0005506	oxidoreductase activity, acting on paired donors, with incorporation or reduction of molecular oxygen//heme binding//iron ion binding	--	--	--	--	FALSE	-0.469027	0.650135	FALSE	-1.26933	0.0248724	DOWN	-1.84885	0.000327066	FALSE	0.45297	0.657016	FALSE	-0.866168	0.131983
Cluster-11149.4797	0	1.06	1.18	1.93	0.87	997	747088543	XP_011091865.1	716	6.8e-73	cytochrome P450 734A1 [Sesamum indicum]	XM_011093563.2	XM_011093563	434	0	PREDICTED: Sesamum indicum cytochrome P450 734A1 (LOC105172201), mRNA	-	-	-	http://www.genome.jp/dbget-bin/www_bget?ko:-	--	--	--	--	PF00067	Cytochrome P450	GO:0055114	oxidation-reduction process	GO:0020037//GO:0005506//GO:0016705	heme binding//iron ion binding//oxidoreductase activity, acting on paired donors, with incorporation or reduction of molecular oxygen	--	--	--	--	FALSE	-0.650328	0.651408	FALSE	0.751761	0.540202	FALSE	-0.00842414	1	DOWN	-7.79395	0.000131617	DOWN	-6.82102	0.00255923
Cluster-11149.41481	4.87	1.78	1.18	22.24	17.21	2127	747106962	XP_011101779.1	1078	1.5e-114	cytochrome P450 CYP749A22-like isoform X1 [Sesamum indicum]	XM_027296718.1	XM_027296718	104	3.83e-44	PREDICTED: Coffea eugenioides cytochrome P450 CYP749A22-like (LOC113752622), mRNA	-	-	-	http://www.genome.jp/dbget-bin/www_bget?ko:-	H2DH17	841	1.8e-88	Cytochrome P450 CYP749A22 OS=Panax ginseng OX=4054 PE=2 SV=1	PF00067//PF04152	Cytochrome P450//Mre11 DNA-binding presumed domain	GO:0006302//GO:0055114	double-strand break repair//oxidation-reduction process	GO:0005506//GO:0030145//GO:0020037//GO:0004519//GO:0016705	iron ion binding//manganese ion binding//heme binding//endonuclease activity//oxidoreductase activity, acting on paired donors, with incorporation or reduction of molecular oxygen	GO:0005634	nucleus	--	--	DOWN	-3.43749	1.58e-11	FALSE	-0.0260289	1	DOWN	-3.57389	1.48e-12	DOWN	-1.51669	0.0037006	DOWN	-1.59264	0.0013113
Cluster-11149.41815	0.99	1.21	1.17	4.17	4.45	1603	747051776	XP_011071980.1	1789	4.2e-197	cytochrome P450 71A6-like [Sesamum indicum]	XM_011073678.2	XM_011073678	324	1.45e-166	PREDICTED: Sesamum indicum cytochrome P450 71A6-like (LOC105157298), mRNA	-	-	-	http://www.genome.jp/dbget-bin/www_bget?ko:-	O04164	1536	3.4e-169	Cytochrome P450 71A6 (Fragment) OS=Nepeta racemosa OX=54731 GN=CYP71A6 PE=2 SV=1	PF00067	Cytochrome P450	GO:0055114	oxidation-reduction process	GO:0005506//GO:0020037//GO:0016705	iron ion binding//heme binding//oxidoreductase activity, acting on paired donors, with incorporation or reduction of molecular oxygen	--	--	--	--	FALSE	-1.58014	0.0104436	FALSE	-0.488218	0.561648	DOWN	-2.17839	7.01e-05	FALSE	-1.4059	0.0304814	DOWN	-1.94337	0.00064863
Cluster-11149.43104	1.64	3.39	1.17	10.13	15.6	1949	747045596	XP_011094898.1	2017	1.8e-223	cytochrome P450 78A3-like [Sesamum indicum]	XM_011094708.2	XM_011094708	731	0	PREDICTED: Sesamum indicum cytochrome P450 78A3-like (LOC105173061), mRNA	-	-	-	http://www.genome.jp/dbget-bin/www_bget?ko:-	O48927	1682	4.9e-186	Cytochrome P450 78A3 OS=Glycine max OX=3847 GN=CYP78A3 PE=2 SV=1	PF00067	Cytochrome P450	GO:0055114	oxidation-reduction process	GO:0016705//GO:0020037//GO:0005506	oxidoreductase activity, acting on paired donors, with incorporation or reduction of molecular oxygen//heme binding//iron ion binding	--	--	--	--	FALSE	-1.37432	0.0136833	FALSE	-1.01875	0.0728646	DOWN	-2.50365	3.15e-07	DOWN	-1.94719	0.000274169	DOWN	-3.01554	2.23e-09
Cluster-11149.7091	0.93	1.79	1.15	3.61	3.82	1478	747073636	XP_011083784.1	1659	4.6e-182	ent-kaurene oxidase, chloroplastic-like [Sesamum indicum]	XM_011085482.2	XM_011085482	743	0	PREDICTED: Sesamum indicum ent-kaurene oxidase, chloroplastic-like (LOC105166213), mRNA	K04122	GA3, CYP701	ent-kaurene oxidase	http://www.genome.jp/dbget-bin/www_bget?ko:K04122	Q93ZB2	1113	3.6e-120	Ent-kaurene oxidase, chloroplastic OS=Arabidopsis thaliana OX=3702 GN=KO PE=1 SV=2	PF00067//PF03785	Cytochrome P450//Peptidase family C25, C terminal ig-like domain	GO:0055114//GO:0006508	oxidation-reduction process//proteolysis	GO:0008233//GO:0016705//GO:0020037//GO:0005506	peptidase activity//oxidoreductase activity, acting on paired donors, with incorporation or reduction of molecular oxygen//heme binding//iron ion binding	--	--	--	--	FALSE	-0.805078	0.310256	FALSE	-0.478032	0.596437	FALSE	-1.39341	0.0149248	FALSE	-1.27706	0.0660222	DOWN	-1.80425	0.00233903
Cluster-11149.6555	2.55	2.75	1.15	11.36	4.45	2172	1276240282	PIN01845.1	1547	6.5e-169	Cytochrome P450 CYP4/CYP19/CYP26 subfamily [Handroanthus impetiginosus]	XM_011095151.2	XM_011095151	556	0	PREDICTED: Sesamum indicum ent-kaurenoic acid oxidase 1 (LOC105173422), mRNA	K04123	KAO	ent-kaurenoic acid hydroxylase	http://www.genome.jp/dbget-bin/www_bget?ko:K04123	O23051	1220	2e-132	Ent-kaurenoic acid oxidase 1 OS=Arabidopsis thaliana OX=3702 GN=KAO1 PE=1 SV=1	PF00067//PF10237	Cytochrome P450//Probable N6-adenine methyltransferase	GO:0055114	oxidation-reduction process	GO:0016705//GO:0008168//GO:0005506//GO:0020037	oxidoreductase activity, acting on paired donors, with incorporation or reduction of molecular oxygen//methyltransferase activity//iron ion binding//heme binding	--	--	--	--	DOWN	-1.84502	0.000416567	FALSE	0.955161	0.105065	FALSE	-1.00043	0.0724588	FALSE	-1.47878	0.00628184	FALSE	-0.573542	0.381909
Cluster-19114.0	1.32	4.89	1.14	0	0	313	848868110	XP_012834694.1	379	2.6e-34	PREDICTED: premnaspirodiene oxygenase-like [Erythranthe guttata]	XM_013590191.2	XM_013590191	49	1.92e-14	PREDICTED: Medicago truncatula cytochrome P450 71D11 (LOC25502641), mRNA	-	-	-	http://www.genome.jp/dbget-bin/www_bget?ko:-	P93530	305	3.7e-27	Cytochrome P450 71D6 OS=Solanum chacoense OX=4108 GN=CYP71D6 PE=2 SV=1	PF00067	Cytochrome P450	GO:0055114	oxidation-reduction process	GO:0016705//GO:0020037//GO:0005506	oxidoreductase activity, acting on paired donors, with incorporation or reduction of molecular oxygen//heme binding//iron ion binding	--	--	--	--	FALSE	6.15832	0.0416009	FALSE	0	1	FALSE	5.89507	0.062744	FALSE	4.44697	0.806498	FALSE	4.18738	0.718417
Cluster-11149.3885	0.61	1.27	1.09	6.56	4.95	1703	747102319	XP_011099321.1	1983	1.4e-219	cytochrome P450 81D1-like [Sesamum indicum]	XM_011101019.2	XM_011101019	591	0	PREDICTED: Sesamum indicum cytochrome P450 81D1-like (LOC105177771), mRNA	-	-	-	http://www.genome.jp/dbget-bin/www_bget?ko:-	W8JMU7	1462	1.4e-160	Cytochrome P450 81Q32 OS=Catharanthus roseus OX=4058 GN=CYP81Q32 PE=2 SV=1	PF00067	Cytochrome P450	GO:0055114	oxidation-reduction process	GO:0016705//GO:0005506//GO:0020037	oxidoreductase activity, acting on paired donors, with incorporation or reduction of molecular oxygen//iron ion binding//heme binding	--	--	--	--	DOWN	-2.16093	0.000120086	FALSE	0.0118189	1	DOWN	-2.2592	3.01e-05	DOWN	-2.74297	2.58e-06	DOWN	-2.77996	1.41e-06
Cluster-11149.42208	0.57	1.11	1.08	2.11	0.8	1593	1052172728	XP_008783087.2	291	2.1e-23	cytochrome P450 93A3 [Phoenix dactylifera]	XM_012978915.1	XM_012978915	89	6.21e-36	PREDICTED: Erythranthe guttatus cytochrome P450 93A3-like (LOC105955209), mRNA	-	-	-	http://www.genome.jp/dbget-bin/www_bget?ko:-	Q42798	248	7.7e-20	3,9-dihydroxypterocarpan 6A-monooxygenase OS=Glycine max OX=3847 GN=CYP93A1 PE=1 SV=1	PF05887//PF00067	Procyclic acidic repetitive protein (PARP)//Cytochrome P450	GO:0055114	oxidation-reduction process	GO:0016705//GO:0020037//GO:0005506	oxidoreductase activity, acting on paired donors, with incorporation or reduction of molecular oxygen//heme binding//iron ion binding	GO:0016020	membrane	--	--	FALSE	-0.712838	0.444305	FALSE	0.99452	0.212447	FALSE	0.171352	1	FALSE	-1.21251	0.140959	FALSE	-0.267727	0.932546
Cluster-11149.3853	0.85	1.13	1.07	2.62	6.21	1649	747047409	XP_011069673.1	1768	1.2e-194	ferruginol synthase-like [Sesamum indicum]	XM_020691308.1	XM_020691308	394	0	PREDICTED: Sesamum indicum ferruginol synthase-like (LOC110011331), mRNA	-	-	-	http://www.genome.jp/dbget-bin/www_bget?ko:-	W8JMV1	1368	1.1e-149	Cytochrome P450 76T24 OS=Catharanthus roseus OX=4058 GN=CYP76T24 PE=2 SV=1	PF00067	Cytochrome P450	GO:0055114	oxidation-reduction process	GO:0005506//GO:0020037//GO:0016705	iron ion binding//heme binding//oxidoreductase activity, acting on paired donors, with incorporation or reduction of molecular oxygen	--	--	--	--	FALSE	-1.00682	0.187424	DOWN	-1.6383	0.00282681	DOWN	-2.75515	2.8e-07	FALSE	-0.95391	0.233253	DOWN	-2.64121	1.56e-06
Cluster-11149.8308	1.06	1.11	1.07	29.39	12.44	1110	848901170	XP_012850744.1	1314	3.5e-142	PREDICTED: cytochrome P450 CYP72A219-like [Erythranthe guttata]	XM_012995161.1	XM_012995161	276	4.78e-140	PREDICTED: Erythranthe guttatus cytochrome P450 CYP72A219-like (LOC105970353), mRNA	-	-	-	http://www.genome.jp/dbget-bin/www_bget?ko:-	H2DH21	956	4.3e-102	Cytochrome P450 CYP72A219 OS=Panax ginseng OX=4054 PE=2 SV=1	PF00067	Cytochrome P450	GO:0055114	oxidation-reduction process	GO:0016705//GO:0020037//GO:0005506	oxidoreductase activity, acting on paired donors, with incorporation or reduction of molecular oxygen//heme binding//iron ion binding	--	--	--	--	DOWN	-4.51561	7.91e-16	FALSE	0.843103	0.168916	DOWN	-3.78181	1.32e-11	DOWN	-4.12148	2.05e-13	DOWN	-3.32717	2.57e-09
Cluster-11149.8250	1.78	1.61	1.06	1.4	2.31	492	1279092675	XP_022848656.1	331	1.5e-28	cytochrome P450 CYP72A219-like isoform X2 [Olea europaea var. sylvestris]	XM_008452532.2	XM_008452532	72	5.14e-27	PREDICTED: Cucumis melo cytochrome P450 CYP72A219-like (LOC103492242), mRNA	-	-	-	http://www.genome.jp/dbget-bin/www_bget?ko:-	H2DH21	299	2.9e-26	Cytochrome P450 CYP72A219 OS=Panax ginseng OX=4054 PE=2 SV=1	PF00067	Cytochrome P450	GO:0055114	oxidation-reduction process	GO:0016705//GO:0020037//GO:0005506	oxidoreductase activity, acting on paired donors, with incorporation or reduction of molecular oxygen//heme binding//iron ion binding	--	--	--	--	FALSE	0.42754	0.999455	FALSE	-1.10687	0.482961	FALSE	-0.788393	0.582262	FALSE	0.987522	0.635231	FALSE	-0.167601	1
Cluster-11149.42267	3.02	1.92	1.06	9.38	19.22	1627	747049708	XP_011070908.1	1604	1.2e-175	cytochrome P450 CYP749A22 [Sesamum indicum]	XM_011072606.2	XM_011072606	578	0	PREDICTED: Sesamum indicum cytochrome P450 CYP749A22 (LOC105156470), mRNA	K15639	CYP734A1, BAS1	PHYB activation tagged suppressor 1	http://www.genome.jp/dbget-bin/www_bget?ko:K15639	H2DH17	1052	4.6e-113	Cytochrome P450 CYP749A22 OS=Panax ginseng OX=4054 PE=2 SV=1	PF00067	Cytochrome P450	GO:0055114	oxidation-reduction process	GO:0020037//GO:0005506//GO:0016705	heme binding//iron ion binding//oxidoreductase activity, acting on paired donors, with incorporation or reduction of molecular oxygen	--	--	--	--	DOWN	-2.0845	0.000107001	FALSE	-1.43128	0.00634434	DOWN	-3.62606	1.26e-12	FALSE	-0.962704	0.124913	DOWN	-2.44371	8.9e-07
Cluster-11149.5266	0.49	2.41	1.05	2.16	5.41	603	747093271	XP_011094433.1	597	2.6e-59	cytochrome P450 76A1-like [Sesamum indicum]	--	--	--	--	--	K20618	CYP76A	cytochrome P450 family 76 subfamily A	http://www.genome.jp/dbget-bin/www_bget?ko:K20618	W8JIS5	497	3.9e-49	Iridoid oxidase OS=Catharanthus roseus OX=4058 GN=IO PE=1 SV=1	PF00067	Cytochrome P450	GO:0055114	oxidation-reduction process	GO:0016705//GO:0005506//GO:0020037	oxidoreductase activity, acting on paired donors, with incorporation or reduction of molecular oxygen//iron ion binding//heme binding	--	--	--	--	FALSE	0.371718	0.954215	FALSE	-1.71404	0.0189184	FALSE	-1.45216	0.0355234	FALSE	-1.46867	0.25536	DOWN	-3.22571	0.000206744
Cluster-11149.1964	1.06	0	1.02	0	2.11	413	747051776	XP_011071980.1	475	2.5e-45	cytochrome P450 71A6-like [Sesamum indicum]	XM_018959410.1	XM_018959410	61	5.56e-21	PREDICTED: Juglans regia cytochrome P450 71A26-like (LOC108986701), mRNA	-	-	-	http://www.genome.jp/dbget-bin/www_bget?ko:-	A0A068Q6L2	384	3.4e-36	Cytochrome P450 736A117 OS=Prunus mume OX=102107 GN=CYP736A117 PE=2 SV=1	PF00067	Cytochrome P450	GO:0055114	oxidation-reduction process	GO:0005506//GO:0020037//GO:0016705	iron ion binding//heme binding//oxidoreductase activity, acting on paired donors, with incorporation or reduction of molecular oxygen	--	--	--	--	FALSE	-5.13e-15	1	FALSE	-6.24701	0.036604	FALSE	-6.16242	0.0233754	FALSE	5.41351	0.233253	FALSE	-0.778015	0.800906
Cluster-11149.42637	1	1.48	1.02	5.18	5.38	635	848853824	XP_012845463.1	701	2.4e-71	PREDICTED: ent-kaurene oxidase, chloroplastic [Erythranthe guttata]	XM_011085482.2	XM_011085482	280	1.59e-142	PREDICTED: Sesamum indicum ent-kaurene oxidase, chloroplastic-like (LOC105166213), mRNA	K04122	GA3, CYP701	ent-kaurene oxidase	http://www.genome.jp/dbget-bin/www_bget?ko:K04122	Q93ZB2	558	3.5e-56	Ent-kaurene oxidase, chloroplastic OS=Arabidopsis thaliana OX=3702 GN=KO PE=1 SV=2	PF00067	Cytochrome P450	GO:0055114	oxidation-reduction process	GO:0005506//GO:0020037//GO:0016705	iron ion binding//heme binding//oxidoreductase activity, acting on paired donors, with incorporation or reduction of molecular oxygen	--	--	--	--	FALSE	-1.58187	0.0674825	FALSE	-0.453835	0.704996	DOWN	-2.14435	0.00163782	FALSE	-1.69477	0.0495033	DOWN	-2.19593	0.00378632
Cluster-11149.47315	0.41	3.85	0.99	3.38	5.26	463	1276271721	PIN27094.1	522	9.9e-51	Cytochrome P450 CYP2 subfamily [Handroanthus impetiginosus]	--	--	--	--	--	-	-	-	http://www.genome.jp/dbget-bin/www_bget?ko:-	X2EVQ5	215	1.5e-16	Cytochrome P450 Tp9025 OS=Tanacetum parthenium OX=127999 PE=2 SV=1	PF00067	Cytochrome P450	GO:0055114	oxidation-reduction process	GO:0005506//GO:0020037//GO:0016705	iron ion binding//heme binding//oxidoreductase activity, acting on paired donors, with incorporation or reduction of molecular oxygen	--	--	--	--	FALSE	0.421445	0.854559	FALSE	-1.03143	0.277979	FALSE	-0.719961	0.459444	FALSE	-2.35347	0.120193	DOWN	-3.42178	0.00130984
Cluster-14267.0	0.34	0.16	0.98	2.1	0.95	1379	1276271472	PIN26869.1	1730	2.5e-190	Cytochrome P450 CYP4/CYP19/CYP26 subfamily [Handroanthus impetiginosus]	XM_028236175.1	XM_028236175	82	4.17e-32	PREDICTED: Camellia sinensis alkane hydroxylase MAH1-like (LOC114292263), mRNA	-	-	-	http://www.genome.jp/dbget-bin/www_bget?ko:-	Q9FVS9	1022	1.2e-109	Alkane hydroxylase MAH1 OS=Arabidopsis thaliana OX=3702 GN=CYP96A15 PE=2 SV=1	PF00067	Cytochrome P450	GO:0055114	oxidation-reduction process	GO:0005506//GO:0020037//GO:0016705	iron ion binding//heme binding//oxidoreductase activity, acting on paired donors, with incorporation or reduction of molecular oxygen	--	--	--	--	DOWN	-3.50655	3.73e-05	FALSE	0.73639	0.420279	DOWN	-2.87341	0.00149315	FALSE	-1.94678	0.0151633	FALSE	-1.25851	0.219006
Cluster-11149.45594	0.12	0.19	0.96	0.37	0.5	935	747068720	XP_011081129.1	1192	4.1e-128	cytochrome P450 93A3-like [Sesamum indicum]	XM_012990236.1	XM_012990236	244	2.46e-122	PREDICTED: Erythranthe guttatus geraniol 8-hydroxylase-like (LOC105965668), mRNA	-	-	-	http://www.genome.jp/dbget-bin/www_bget?ko:-	Q42798	619	4.3e-63	3,9-dihydroxypterocarpan 6A-monooxygenase OS=Glycine max OX=3847 GN=CYP93A1 PE=1 SV=1	PF00067	Cytochrome P450	GO:0055114	oxidation-reduction process	GO:0020037//GO:0005506//GO:0016705	heme binding//iron ion binding//oxidoreductase activity, acting on paired donors, with incorporation or reduction of molecular oxygen	--	--	--	--	FALSE	-0.7149	0.869797	FALSE	-0.824764	0.794971	FALSE	-1.64255	0.353272	FALSE	-0.874505	1	FALSE	-1.73787	0.28393
Cluster-11149.7199	1.05	2.34	0.94	3	2.41	3841	848906225	XP_012852443.1	2233	3.3e-248	PREDICTED: DNA-directed RNA polymerase II subunit RPB2-like [Erythranthe guttata]	XM_020699415.1	XM_020699415	575	0	PREDICTED: Sesamum indicum DNA-directed RNA polymerase II subunit RPB2-like (LOC105178477), mRNA	K03010	RPB2, POLR2B	DNA-directed RNA polymerase II subunit RPB2	http://www.genome.jp/dbget-bin/www_bget?ko:K03010	Q42877	2133	4.9e-238	DNA-directed RNA polymerase II subunit RPB2 OS=Solanum lycopersicum OX=4081 GN=RPB2 PE=2 SV=1	PF00562//PF04560//PF04567//PF00067	RNA polymerase Rpb2, domain 6//RNA polymerase Rpb2, domain 7//RNA polymerase Rpb2, domain 5//Cytochrome P450	GO:0006144//GO:0006351//GO:0055114//GO:0006206	purine nucleobase metabolic process//transcription, DNA-templated//oxidation-reduction process//pyrimidine nucleobase metabolic process	GO:0005506//GO:0016705//GO:0003899//GO:0020037//GO:0003677	iron ion binding//oxidoreductase activity, acting on paired donors, with incorporation or reduction of molecular oxygen//DNA-directed 5'-3' RNA polymerase activity//heme binding//DNA binding	GO:0005730	nucleolus	KOG0214	RNA polymerase II, second largest subunit	FALSE	-0.158572	1	FALSE	-0.0756587	1	FALSE	-0.344926	0.65052	FALSE	-0.83654	0.215639	FALSE	-0.962019	0.0936996
Cluster-11149.8311	3.91	0.32	0.92	2.53	0.32	383	848901170	XP_012850744.1	239	5.4e-18	PREDICTED: cytochrome P450 CYP72A219-like [Erythranthe guttata]	--	--	--	--	--	-	-	-	http://www.genome.jp/dbget-bin/www_bget?ko:-	W8JWW3	168	3.5e-11	Cytochrome P450 72A225 OS=Catharanthus roseus OX=4058 GN=CYP72A225 PE=2 SV=1	--	--	--	--	--	--	--	--	--	--	FALSE	-2.60525	0.288411	FALSE	2.45465	0.271886	FALSE	-0.241441	1	FALSE	1.24827	0.362672	FALSE	3.62226	0.0196035
Cluster-9183.0	0.57	0.23	0.92	0	0.34	629	747059543	XP_011076158.1	909	1.8e-95	cytokinin hydroxylase [Sesamum indicum]	XM_011077856.2	XM_011077856	351	0	PREDICTED: Sesamum indicum cytokinin hydroxylase (LOC105160470), mRNA	-	-	-	http://www.genome.jp/dbget-bin/www_bget?ko:-	Q9ZW95	414	1.7e-39	Cytokinin hydroxylase OS=Arabidopsis thaliana OX=3702 GN=CYP735A2 PE=1 SV=1	PF00067	Cytochrome P450	GO:0055114	oxidation-reduction process	GO:0005506//GO:0020037//GO:0016705	iron ion binding//heme binding//oxidoreductase activity, acting on paired donors, with incorporation or reduction of molecular oxygen	--	--	--	--	FALSE	4.21768	0.835728	FALSE	-4.86329	0.540202	FALSE	-0.81455	1	FALSE	5.72865	0.148189	FALSE	0.91175	0.939472
Cluster-11149.15463	2.94	1.23	0.9	0.76	0.77	3413	1276263770	PIN20276.1	462	6.6e-43	Cytochrome P450 CYP4/CYP19/CYP26 subfamily [Handroanthus impetiginosus]	XM_011093950.2	XM_011093950	172	9.76e-82	PREDICTED: Sesamum indicum cytochrome P450 710A11-like (LOC105172499), mRNA	-	-	-	http://www.genome.jp/dbget-bin/www_bget?ko:-	Q1T7C2	380	8.1e-35	Cytochrome P450 710A11 OS=Solanum lycopersicum OX=4081 GN=CYP710A11 PE=1 SV=1	PF00069//PF07714	Protein kinase domain//Protein tyrosine and serine/threonine kinase	GO:0006468	protein phosphorylation	GO:0004672//GO:0005524	protein kinase activity//ATP binding	--	--	--	--	FALSE	0.888865	0.244997	FALSE	-0.423726	0.719817	FALSE	0.354395	0.705108	UP	2.6243	9.11e-07	UP	2.15028	4.51e-05
Cluster-11149.39791	0.89	1.62	0.88	6.92	4.03	491	848900754	XP_012850549.1	667	1.6e-67	PREDICTED: cytochrome P450 CYP72A219-like [Erythranthe guttata]	XM_011084516.2	XM_011084516	91	1.41e-37	PREDICTED: Sesamum indicum cytochrome P450 CYP72A219 (LOC105165490), mRNA	-	-	-	http://www.genome.jp/dbget-bin/www_bget?ko:-	H2DH21	506	2.9e-50	Cytochrome P450 CYP72A219 OS=Panax ginseng OX=4054 PE=2 SV=1	PF00067	Cytochrome P450	GO:0055114	oxidation-reduction process	GO:0005506//GO:0020037//GO:0016705	iron ion binding//heme binding//oxidoreductase activity, acting on paired donors, with incorporation or reduction of molecular oxygen	--	--	--	--	FALSE	-1.85099	0.0341868	FALSE	0.37729	0.830773	FALSE	-1.58149	0.0724202	FALSE	-2.27488	0.0151633	FALSE	-1.94327	0.0707899
Cluster-11149.7705	1.72	2.01	0.82	2.08	2.94	2198	1276253900	PIN12065.1	2491	2.3e-278	Cytochrome P450 CYP4/CYP19/CYP26 subfamily [Handroanthus impetiginosus]	XM_011073952.2	XM_011073952	942	0	PREDICTED: Sesamum indicum cytochrome P450 734A1 (LOC105157543), mRNA	K15639	CYP734A1, BAS1	PHYB activation tagged suppressor 1	http://www.genome.jp/dbget-bin/www_bget?ko:K15639	O48786	1775	9.1e-197	Cytochrome P450 734A1 OS=Arabidopsis thaliana OX=3702 GN=CYP734A1 PE=2 SV=1	PF00067//PF05478	Cytochrome P450//Prominin	GO:0055114	oxidation-reduction process	GO:0016705//GO:0020037//GO:0005506	oxidoreductase activity, acting on paired donors, with incorporation or reduction of molecular oxygen//heme binding//iron ion binding	GO:0016021	integral component of membrane	--	--	FALSE	0.154473	1	FALSE	-0.893974	0.170514	FALSE	-0.850085	0.157223	FALSE	0.397546	0.769763	FALSE	-0.546205	0.442805
Cluster-11149.32408	0.4	1.09	0.81	0.33	0.47	897	848904051	XP_012851727.1	792	9.5e-82	PREDICTED: ferruginol synthase-like [Erythranthe guttata]	--	--	--	--	--	-	-	-	http://www.genome.jp/dbget-bin/www_bget?ko:-	W8JMV1	625	8.3e-64	Cytochrome P450 76T24 OS=Catharanthus roseus OX=4058 GN=CYP76T24 PE=2 SV=1	PF00067	Cytochrome P450	GO:0055114	oxidation-reduction process	GO:0016705//GO:0005506//GO:0020037	oxidoreductase activity, acting on paired donors, with incorporation or reduction of molecular oxygen//iron ion binding//heme binding	--	--	--	--	FALSE	1.91336	0.102877	FALSE	-0.891151	0.751054	FALSE	0.910241	0.489478	FALSE	0.921509	0.892507	FALSE	-0.0174292	1
Cluster-17782.0	0.69	0.81	0.8	0	0	684	848868110	XP_012834694.1	752	3.1e-77	PREDICTED: premnaspirodiene oxygenase-like [Erythranthe guttata]	XM_027313835.1	XM_027313835	50	1.24e-14	PREDICTED: Coffea eugenioides premnaspirodiene oxygenase-like (LOC113769380), mRNA	-	-	-	http://www.genome.jp/dbget-bin/www_bget?ko:-	Q94FM7	704	4.4e-73	5-epiaristolochene 1,3-dihydroxylase OS=Nicotiana tabacum OX=4097 GN=CYP71D20 PE=1 SV=2	PF00067	Cytochrome P450	GO:0055114	oxidation-reduction process	GO:0005506//GO:0020037//GO:0016705	iron ion binding//heme binding//oxidoreductase activity, acting on paired donors, with incorporation or reduction of molecular oxygen	--	--	--	--	FALSE	6.15832	0.0416009	FALSE	0	1	FALSE	5.89507	0.062744	FALSE	6.20629	0.0606833	FALSE	5.93704	0.0636174
Cluster-11149.43146	1.12	1.38	0.8	3	19.1	405	747093271	XP_011094433.1	255	7.9e-20	cytochrome P450 76A1-like [Sesamum indicum]	--	--	--	--	--	-	-	-	http://www.genome.jp/dbget-bin/www_bget?ko:-	W8JIS5	192	6.1e-14	Iridoid oxidase OS=Catharanthus roseus OX=4058 GN=IO PE=1 SV=1	PF00067	Cytochrome P450	GO:0055114	oxidation-reduction process	GO:0016705//GO:0005506//GO:0020037	oxidoreductase activity, acting on paired donors, with incorporation or reduction of molecular oxygen//iron ion binding//heme binding	--	--	--	--	FALSE	-0.858962	0.841342	DOWN	-3.0573	7.45e-06	DOWN	-4.02156	4.67e-08	FALSE	-0.765938	0.806498	DOWN	-3.8654	1.28e-06
Cluster-11149.356	1.87	0.41	0.79	0.5	1.72	1429	747102319	XP_011099321.1	1823	4.2e-201	cytochrome P450 81D1-like [Sesamum indicum]	XM_012974541.1	XM_012974541	376	0	PREDICTED: Erythranthe guttatus cytochrome P450 81F1-like (LOC105951153), mRNA	-	-	-	http://www.genome.jp/dbget-bin/www_bget?ko:-	W8JMU7	1357	1.7e-148	Cytochrome P450 81Q32 OS=Catharanthus roseus OX=4058 GN=CYP81Q32 PE=2 SV=1	PF00067	Cytochrome P450	GO:0055114	oxidation-reduction process	GO:0020037//GO:0005506//GO:0016705	heme binding//iron ion binding//oxidoreductase activity, acting on paired donors, with incorporation or reduction of molecular oxygen	--	--	--	--	FALSE	-0.0831788	1	DOWN	-2.16047	0.0033178	DOWN	-2.35233	0.00112426	UP	2.55926	0.000192069	FALSE	0.349595	0.736575
Cluster-11149.7040	8.84	1.7	0.79	21.04	9.04	1814	1276271721	PIN27094.1	1528	8.7e-167	Cytochrome P450 CYP2 subfamily [Handroanthus impetiginosus]	XM_011072425.2	XM_011072425	387	0	PREDICTED: Sesamum indicum cytochrome P450 76C2-like (LOC105156325), mRNA	-	-	-	http://www.genome.jp/dbget-bin/www_bget?ko:-	W8JMV1	720	1.6e-74	Cytochrome P450 76T24 OS=Catharanthus roseus OX=4058 GN=CYP76T24 PE=2 SV=1	PF00067	Cytochrome P450	GO:0055114	oxidation-reduction process	GO:0016705//GO:0020037//GO:0005506	oxidoreductase activity, acting on paired donors, with incorporation or reduction of molecular oxygen//heme binding//iron ion binding	--	--	--	--	DOWN	-3.42128	3.4e-11	FALSE	0.821805	0.178044	DOWN	-2.70975	1.31e-07	FALSE	-0.57714	0.425535	FALSE	0.194646	0.860427
Cluster-13507.0	0.77	0.34	0.78	0.11	0.33	642	747054008	XP_011073191.1	666	2.8e-67	cytochrome P450 82C4-like [Sesamum indicum]	--	--	--	--	--	-	-	-	http://www.genome.jp/dbget-bin/www_bget?ko:-	Q9LSF8	497	4.1e-49	Dimethylnonatriene synthase OS=Arabidopsis thaliana OX=3702 GN=CYP82G1 PE=1 SV=1	PF00067	Cytochrome P450	GO:0055114	oxidation-reduction process	GO:0020037//GO:0005506//GO:0016705	heme binding//iron ion binding//oxidoreductase activity, acting on paired donors, with incorporation or reduction of molecular oxygen	--	--	--	--	FALSE	1.71802	0.959805	FALSE	-1.86689	0.909352	FALSE	-0.260693	1	FALSE	3.2998	0.193618	FALSE	1.38779	0.612263
Cluster-11149.45717	0.16	0	0.78	0.31	0.47	526	747099665	XP_011097890.1	755	1.1e-77	cytochrome P450 716B1 [Sesamum indicum]	XM_011099588.2	XM_011099588	277	6.07e-141	PREDICTED: Sesamum indicum cytochrome P450 716B1 (LOC105176697), mRNA	-	-	-	http://www.genome.jp/dbget-bin/www_bget?ko:-	Q9AXM6	268	1.2e-22	Taxane 10-beta-hydroxylase OS=Taxus cuspidata OX=99806 GN=CYP725A1 PE=1 SV=1	PF00067	Cytochrome P450	GO:0055114	oxidation-reduction process	GO:0016705//GO:0020037//GO:0005506	oxidoreductase activity, acting on paired donors, with incorporation or reduction of molecular oxygen//heme binding//iron ion binding	--	--	--	--	FALSE	-3.96925	0.835728	FALSE	-0.960237	1	FALSE	-4.78057	0.441562	FALSE	-0.295279	1	FALSE	-1.28478	0.843384
Cluster-11149.34137	2.9	5.34	0.77	4.94	1.03	2204	747101791	XP_011099036.1	1747	4.2e-192	cytochrome P450 85A1 isoform X1 [Sesamum indicum]	XM_020699223.1	XM_020699223	785	0	PREDICTED: Sesamum indicum cytochrome P450 85A1 (LOC105177542), transcript variant X2, mRNA	-	-	-	http://www.genome.jp/dbget-bin/www_bget?ko:-	Q43147	1537	3.6e-169	Cytochrome P450 85A1 OS=Solanum lycopersicum OX=4081 GN=CYP85A1 PE=2 SV=1	PF00067	Cytochrome P450	GO:0055114	oxidation-reduction process	GO:0020037//GO:0005506//GO:0016705	heme binding//iron ion binding//oxidoreductase activity, acting on paired donors, with incorporation or reduction of molecular oxygen	--	--	--	--	FALSE	0.313282	0.835728	UP	1.8576	0.000912082	UP	2.05999	0.00010519	FALSE	-0.0937645	1	UP	1.71328	0.00204256
Cluster-11149.41135	0.4	1.55	0.74	0	1.59	357	604303770	EYU23179.1	519	1.7e-50	hypothetical protein MIMGU_mgv1a019215mg, partial [Erythranthe guttata]	XM_020696296.1	XM_020696296	143	1.24e-66	PREDICTED: Sesamum indicum geraniol 8-hydroxylase-like (LOC105156305), mRNA	-	-	-	http://www.genome.jp/dbget-bin/www_bget?ko:-	O64636	360	1.8e-33	Cytochrome P450 76C1 OS=Arabidopsis thaliana OX=3702 GN=CYP76C1 PE=2 SV=1	PF00067	Cytochrome P450	GO:0055114	oxidation-reduction process	GO:0020037//GO:0005506//GO:0016705	heme binding//iron ion binding//oxidoreductase activity, acting on paired donors, with incorporation or reduction of molecular oxygen	--	--	--	--	FALSE	5.17838	0.380656	FALSE	-5.26588	0.357601	FALSE	-0.263319	1	FALSE	3.51164	1	FALSE	-1.68433	0.618116
Cluster-11149.47354	1.33	3.5	0.74	2.3	6.5	1079	747072132	XP_011082966.1	1366	3.1e-148	cytochrome P450 CYP72A219 [Sesamum indicum]	XM_023013406.1	XM_023013406	319	5.79e-164	PREDICTED: Olea europaea var. sylvestris cytochrome P450 CYP72A219-like (LOC111388647), mRNA	-	-	-	http://www.genome.jp/dbget-bin/www_bget?ko:-	H2DH21	1172	3.7e-127	Cytochrome P450 CYP72A219 OS=Panax ginseng OX=4054 PE=2 SV=1	PF00067	Cytochrome P450	GO:0055114	oxidation-reduction process	GO:0016705//GO:0005506//GO:0020037	oxidoreductase activity, acting on paired donors, with incorporation or reduction of molecular oxygen//iron ion binding//heme binding	--	--	--	--	FALSE	0.814566	0.344467	DOWN	-1.89534	0.0010205	FALSE	-1.19135	0.0376684	FALSE	-0.111731	1	DOWN	-2.05595	0.000405008
Cluster-11149.1439	0.04	0.91	0.72	0.58	3.31	2342	747057894	XP_011075269.1	1980	4.3e-219	3,9-dihydroxypterocarpan 6A-monooxygenase-like [Sesamum indicum]	XM_011076967.2	XM_011076967	855	0	PREDICTED: Sesamum indicum 3,9-dihydroxypterocarpan 6A-monooxygenase-like (LOC105159781), mRNA	-	-	-	http://www.genome.jp/dbget-bin/www_bget?ko:-	Q42798	924	4.6e-98	3,9-dihydroxypterocarpan 6A-monooxygenase OS=Glycine max OX=3847 GN=CYP93A1 PE=1 SV=1	PF00067	Cytochrome P450	GO:0055114	oxidation-reduction process	GO:0005506//GO:0020037//GO:0016705	iron ion binding//heme binding//oxidoreductase activity, acting on paired donors, with incorporation or reduction of molecular oxygen	--	--	--	--	FALSE	0.82923	0.380656	DOWN	-2.89143	3.1e-07	DOWN	-2.17261	6.57e-05	FALSE	-3.11862	0.00623577	DOWN	-6.04605	1.01e-13
Cluster-11149.6221	0.51	0.17	0.67	0.67	0	505	1276260035	PIN17125.1	198	4e-13	Cytochrome P450 CYP2 subfamily [Handroanthus impetiginosus]	--	--	--	--	--	-	-	-	http://www.genome.jp/dbget-bin/www_bget?ko:-	--	--	--	--	--	--	--	--	--	--	--	--	--	--	FALSE	-1.62924	0.744832	FALSE	4.85401	0.357601	FALSE	3.0555	1	FALSE	0.255274	1	FALSE	4.7457	0.44892
Cluster-11149.15733	0.22	2.17	0.63	0	0.87	449	593697778	XP_007149362.1	180	4.4e-11	hypothetical protein PHAVU_005G063900g [Phaseolus vulgaris]	XM_006348849.2	XM_006348849	37	1.34e-07	PREDICTED: Solanum tuberosum cytochrome P450 CYP72A219-like (LOC102587164), mRNA	-	-	-	http://www.genome.jp/dbget-bin/www_bget?ko:-	U5NE19	162	2e-10	7-deoxyloganic acid hydroxylase OS=Catharanthus roseus OX=4058 GN=7DLH PE=1 SV=1	PF00067	Cytochrome P450	GO:0055114	oxidation-reduction process	GO:0005506//GO:0020037//GO:0016705	iron ion binding//heme binding//oxidoreductase activity, acting on paired donors, with incorporation or reduction of molecular oxygen	--	--	--	--	FALSE	6.47621	0.0167985	FALSE	-5.26588	0.357601	FALSE	1.02971	0.517719	FALSE	3.51164	1	FALSE	-1.68433	0.618116
Cluster-11149.659	0	1.28	0.62	0	0	453	747103871	XP_011100144.1	573	1.2e-56	alkane hydroxylase MAH1-like [Sesamum indicum]	XM_025134182.1	XM_025134182	36	4.85e-07	PREDICTED: Cynara cardunculus var. scolymus alkane hydroxylase MAH1-like (LOC112524391), mRNA	-	-	-	http://www.genome.jp/dbget-bin/www_bget?ko:-	Q9FVS9	377	2.4e-35	Alkane hydroxylase MAH1 OS=Arabidopsis thaliana OX=3702 GN=CYP96A15 PE=2 SV=1	PF00067//PF00299	Cytochrome P450//Squash family serine protease inhibitor	GO:0055114	oxidation-reduction process	GO:0016705//GO:0004867//GO:0005506//GO:0020037	oxidoreductase activity, acting on paired donors, with incorporation or reduction of molecular oxygen//serine-type endopeptidase inhibitor activity//iron ion binding//heme binding	--	--	--	--	FALSE	5.75	0.158449	FALSE	0	1	FALSE	5.48809	0.101513	FALSE	0	1	FALSE	0	1
Cluster-9093.0	1.07	1.35	0.62	1.26	1.02	1521	747091447	XP_011093453.1	2109	3.1e-234	ent-kaurenoic acid oxidase 1 [Sesamum indicum]	XM_011086740.2	XM_011086740	805	0	PREDICTED: Sesamum indicum ent-kaurenoic acid oxidase 1 (LOC105167146), mRNA	-	-	-	http://www.genome.jp/dbget-bin/www_bget?ko:-	O23051	1762	2e-195	Ent-kaurenoic acid oxidase 1 OS=Arabidopsis thaliana OX=3702 GN=KAO1 PE=1 SV=1	PF00067	Cytochrome P450	GO:0055114	oxidation-reduction process	GO:0005506//GO:0020037//GO:0016705	iron ion binding//heme binding//oxidoreductase activity, acting on paired donors, with incorporation or reduction of molecular oxygen	--	--	--	--	FALSE	0.300412	0.956457	FALSE	-0.0833062	1	FALSE	0.106601	1	FALSE	0.429853	0.806498	FALSE	0.296542	0.877839
Cluster-11149.46233	1.21	0	0.6	1.34	0.45	535	747105263	XP_011100903.1	774	6.9e-80	alkane hydroxylase MAH1-like [Sesamum indicum]	XM_006346727.2	XM_006346727	152	1.9e-71	PREDICTED: Solanum tuberosum alkane hydroxylase MAH1-like (LOC102606192), mRNA	-	-	-	http://www.genome.jp/dbget-bin/www_bget?ko:-	Q9FVS9	545	9.4e-55	Alkane hydroxylase MAH1 OS=Arabidopsis thaliana OX=3702 GN=CYP96A15 PE=2 SV=1	PF00067	Cytochrome P450	GO:0055114	oxidation-reduction process	GO:0016705//GO:0005506//GO:0020037	oxidoreductase activity, acting on paired donors, with incorporation or reduction of molecular oxygen//iron ion binding//heme binding	--	--	--	--	FALSE	-6.0657	0.0663758	FALSE	1.13266	0.751054	FALSE	-4.78057	0.441562	FALSE	0.502127	0.982025	FALSE	1.57749	0.36165
Cluster-11149.45161	0.32	0.59	0.6	21.9	24.07	916	747040459	XP_011082374.1	999	9.6e-106	premnaspirodiene oxygenase [Sesamum indicum]	XM_011084072.2	XM_011084072	350	0	PREDICTED: Sesamum indicum premnaspirodiene oxygenase (LOC105165137), mRNA	-	-	-	http://www.genome.jp/dbget-bin/www_bget?ko:-	A6YIH8	793	2.8e-83	Premnaspirodiene oxygenase OS=Hyoscyamus muticus OX=35626 GN=CYP71D55 PE=1 SV=1	PF00067	Cytochrome P450	GO:0055114	oxidation-reduction process	GO:0005506//GO:0020037//GO:0016705	iron ion binding//heme binding//oxidoreductase activity, acting on paired donors, with incorporation or reduction of molecular oxygen	--	--	--	--	DOWN	-4.97591	1.21e-15	FALSE	-0.534293	0.484646	DOWN	-5.61739	2.88e-19	DOWN	-5.39924	2.35e-15	DOWN	-5.97794	7.55e-19
Cluster-11149.42207	0.2	1.57	0.58	0	0.39	471	747057892	XP_011075268.1	506	7.3e-49	cytochrome P450 93A3-like [Sesamum indicum]	XM_011076966.2	XM_011076966	232	5.59e-116	PREDICTED: Sesamum indicum cytochrome P450 93A3-like (LOC105159780), mRNA	-	-	-	http://www.genome.jp/dbget-bin/www_bget?ko:-	Q42799	330	7.1e-30	Cytochrome P450 93A2 OS=Glycine max OX=3847 GN=CYP93A2 PE=2 SV=1	PF00067	Cytochrome P450	GO:0055114	oxidation-reduction process	GO:0016705//GO:0005506//GO:0020037	oxidoreductase activity, acting on paired donors, with incorporation or reduction of molecular oxygen//iron ion binding//heme binding	--	--	--	--	FALSE	6.15832	0.0416009	FALSE	-4.3029	0.796404	FALSE	1.67345	0.39259	FALSE	3.51164	1	FALSE	-0.7303	1
Cluster-11149.2519	1.4	2.07	0.58	2.72	11.69	1616	1276261446	PIN18284.1	1853	1.6e-204	Cytochrome P450 CYP2 subfamily [Handroanthus impetiginosus]	XM_011072929.1	XM_011072929	528	0	PREDICTED: Sesamum indicum 7-ethoxycoumarin O-deethylase-like (LOC105156707), mRNA	-	-	-	http://www.genome.jp/dbget-bin/www_bget?ko:-	Q8VWZ7	1019	3.1e-109	geraniol 8-hydroxylase OS=Catharanthus roseus OX=4058 GN=CYP76B6 PE=1 SV=1	PF00067	Cytochrome P450	GO:0055114	oxidation-reduction process	GO:0016705//GO:0020037//GO:0005506	oxidoreductase activity, acting on paired donors, with incorporation or reduction of molecular oxygen//heme binding//iron ion binding	--	--	--	--	FALSE	-0.191153	1	DOWN	-2.49864	1.17e-06	DOWN	-2.80019	3.68e-08	FALSE	-0.287737	0.876549	DOWN	-2.83567	5.72e-08
Cluster-11149.10824	1.69	3.43	0.56	6.82	5.1	555	747093271	XP_011094433.1	382	2e-34	cytochrome P450 76A1-like [Sesamum indicum]	--	--	--	--	--	K20618	CYP76A	cytochrome P450 family 76 subfamily A	http://www.genome.jp/dbget-bin/www_bget?ko:K20618	W8JIS5	315	4.6e-28	Iridoid oxidase OS=Catharanthus roseus OX=4058 GN=IO PE=1 SV=1	PF00067	Cytochrome P450	GO:0055114	oxidation-reduction process	GO:0005506//GO:0020037//GO:0016705	iron ion binding//heme binding//oxidoreductase activity, acting on paired donors, with incorporation or reduction of molecular oxygen	--	--	--	--	FALSE	-0.763035	0.430421	FALSE	0.0200775	1	FALSE	-0.852821	0.314238	FALSE	-1.34348	0.141967	FALSE	-1.37179	0.0878635
Cluster-16895.0	0.27	0.28	0.55	0	1.36	728	747059543	XP_011076158.1	1002	3.4e-106	cytokinin hydroxylase [Sesamum indicum]	XM_011077856.2	XM_011077856	393	0	PREDICTED: Sesamum indicum cytokinin hydroxylase (LOC105160470), mRNA	-	-	-	http://www.genome.jp/dbget-bin/www_bget?ko:-	Q2QYH7	341	5.8e-31	Cytochrome P450 714C2 OS=Oryza sativa subsp. japonica OX=39947 GN=CYP714C2 PE=2 SV=1	PF04055//PF00067	Radical SAM superfamily//Cytochrome P450	GO:0055114	oxidation-reduction process	GO:0003824//GO:0016705//GO:0051536//GO:0020037//GO:0005506	catalytic activity//oxidoreductase activity, acting on paired donors, with incorporation or reduction of molecular oxygen//iron-sulfur cluster binding//heme binding//iron ion binding	--	--	--	--	FALSE	4.77656	0.566119	DOWN	-7.14501	0.00112797	FALSE	-2.54001	0.0422017	FALSE	5.00971	0.362672	FALSE	-2.07531	0.0828579
Cluster-11149.6552	0.14	0	0.55	5.95	2.75	564	848893860	XP_012846971.1	356	2.1e-31	PREDICTED: flavonoid 3',5'-hydroxylase-like [Erythranthe guttata]	--	--	--	--	--	-	-	-	http://www.genome.jp/dbget-bin/www_bget?ko:-	P48419	230	3.3e-18	Flavonoid 3',5'-hydroxylase 2 OS=Petunia hybrida OX=4102 GN=CYP75A3 PE=2 SV=1	PF09396//PF00067	Thrombin light chain//Cytochrome P450	GO:0006508//GO:0055114//GO:0007596	proteolysis//oxidation-reduction process//blood coagulation	GO:0016705//GO:0004252//GO:0020037//GO:0005506	oxidoreductase activity, acting on paired donors, with incorporation or reduction of molecular oxygen//serine-type endopeptidase activity//heme binding//iron ion binding	GO:0005576	extracellular region	--	--	DOWN	-8.33797	2.35e-07	FALSE	0.709866	0.505508	DOWN	-7.47222	8.15e-05	DOWN	-4.6528	5.37e-05	DOWN	-3.96839	0.00194253
Cluster-15560.0	0.56	0.83	0.54	0.07	0.39	1468	802547373	XP_012089888.1	186	2.9e-11	cytochrome P450 77A3 [Jatropha curcas]	JN098455.1	JN098455	43	2.13e-10	Mimulus guttatus mitochondrion, complete genome	-	-	-	http://www.genome.jp/dbget-bin/www_bget?ko:-	O48928	172	4.6e-11	Cytochrome P450 77A3 OS=Glycine max OX=3847 GN=CYP77A3 PE=2 SV=1	--	--	--	--	--	--	--	--	--	--	UP	3.6994	0.00167453	FALSE	-2.7982	0.0413052	FALSE	0.786379	0.459564	UP	3.58098	0.00310408	FALSE	0.738182	0.566485
Cluster-11149.5441	0.77	0.88	0.52	0.84	2.89	1959	1276246085	PIN06001.1	2239	3.4e-249	Cytochrome P450 CYP2 subfamily [Handroanthus impetiginosus]	XM_011096596.2	XM_011096596	895	0	PREDICTED: Sesamum indicum cytochrome P450 78A3-like (LOC105174473), mRNA	-	-	-	http://www.genome.jp/dbget-bin/www_bget?ko:-	O48927	1664	6e-184	Cytochrome P450 78A3 OS=Glycine max OX=3847 GN=CYP78A3 PE=2 SV=1	PF00067	Cytochrome P450	GO:0055114	oxidation-reduction process	GO:0016705//GO:0020037//GO:0005506	oxidoreductase activity, acting on paired donors, with incorporation or reduction of molecular oxygen//heme binding//iron ion binding	--	--	--	--	FALSE	0.262946	1	DOWN	-2.17795	0.00022537	DOWN	-2.02518	0.000401922	FALSE	0.543969	0.728901	FALSE	-1.68295	0.00508736
Cluster-11149.7109	1.84	1.09	0.52	6.39	5.07	1710	745790895	AJD25156.1	899	7.1e-94	cytochrome P450 CYP71AT92 [Salvia miltiorrhiza]	XM_011075940.2	XM_011075940	376	0	PREDICTED: Sesamum indicum cytochrome P450 71B36-like (LOC105159010), mRNA	-	-	-	http://www.genome.jp/dbget-bin/www_bget?ko:-	Q9LIP3	643	1.3e-65	Cytochrome P450 71B37 OS=Arabidopsis thaliana OX=3702 GN=CYP71B37 PE=3 SV=2	PF00067	Cytochrome P450	GO:0055114	oxidation-reduction process	GO:0016705//GO:0020037//GO:0005506	oxidoreductase activity, acting on paired donors, with incorporation or reduction of molecular oxygen//heme binding//iron ion binding	--	--	--	--	DOWN	-2.35106	2.83e-05	FALSE	-0.0617314	1	DOWN	-2.52276	3.13e-06	FALSE	-1.12441	0.0712645	FALSE	-1.23585	0.0281458
Cluster-11149.12930	0.69	1.52	0.51	13.25	84.65	1900	747105351	XP_011100951.1	2136	2.9e-237	cytochrome P450 84A1-like [Sesamum indicum]	XM_011092117.2	XM_011092117	866	0	PREDICTED: Sesamum indicum cytochrome P450 84A1-like (LOC105171102), mRNA	K09755	CYP84A, F5H	ferulate-5-hydroxylase	http://www.genome.jp/dbget-bin/www_bget?ko:K09755	Q42600	1872	4.5e-208	Cytochrome P450 84A1 OS=Arabidopsis thaliana OX=3702 GN=CYP84A1 PE=1 SV=1	PF00067	Cytochrome P450	GO:0055114	oxidation-reduction process	GO:0016705//GO:0005506//GO:0020037	oxidoreductase activity, acting on paired donors, with incorporation or reduction of molecular oxygen//iron ion binding//heme binding	--	--	--	--	DOWN	-2.91813	1.97e-08	DOWN	-3.07177	2.55e-10	DOWN	-6.10012	1.15e-28	DOWN	-3.57855	6.78e-11	DOWN	-6.69924	3e-31
Cluster-11149.41747	0.66	0.69	0.49	0.57	2.8	698	848871008	XP_012836085.1	265	9.5e-21	PREDICTED: uncharacterized protein LOC105956739 [Erythranthe guttata]	--	--	--	--	--	K20618	CYP76A	cytochrome P450 family 76 subfamily A	http://www.genome.jp/dbget-bin/www_bget?ko:K20618	W8JIS5	209	1.1e-15	Iridoid oxidase OS=Catharanthus roseus OX=4058 GN=IO PE=1 SV=1	PF00067	Cytochrome P450	GO:0055114	oxidation-reduction process	GO:0016705//GO:0005506//GO:0020037	oxidoreductase activity, acting on paired donors, with incorporation or reduction of molecular oxygen//iron ion binding//heme binding	--	--	--	--	FALSE	0.477097	0.956457	DOWN	-2.66843	0.00304105	FALSE	-2.29937	0.0061719	FALSE	0.860207	0.806498	FALSE	-1.85294	0.0486429
Cluster-11149.12419	0.13	1.34	0.49	2.07	6	1599	848876623	XP_012838767.1	1808	2.6e-199	PREDICTED: cytochrome P450 81E8-like [Erythranthe guttata]	XM_012983313.1	XM_012983313	409	0	PREDICTED: Erythranthe guttatus cytochrome P450 81E8-like (LOC105959254), mRNA	-	-	-	http://www.genome.jp/dbget-bin/www_bget?ko:-	W8JMU7	1099	1.6e-118	Cytochrome P450 81Q32 OS=Catharanthus roseus OX=4058 GN=CYP81Q32 PE=2 SV=1	PF00067	Cytochrome P450	GO:0055114	oxidation-reduction process	GO:0020037//GO:0005506//GO:0016705	heme binding//iron ion binding//oxidoreductase activity, acting on paired donors, with incorporation or reduction of molecular oxygen	--	--	--	--	FALSE	-0.421919	0.797715	DOWN	-1.93253	0.000399861	DOWN	-2.46463	4.4e-06	DOWN	-3.33422	7.35e-05	DOWN	-5.30969	1.32e-13
Cluster-11149.3012	0.23	0.32	0.47	1.36	0.77	1366	1276258387	PIN15763.1	1088	6.8e-116	Cytochrome P450 CYP4/CYP19/CYP26 subfamily [Handroanthus impetiginosus]	XM_020694748.1	XM_020694748	241	1.69e-120	PREDICTED: Sesamum indicum cytochrome P450 90A1 (LOC105165765), transcript variant X2, mRNA	-	-	-	http://www.genome.jp/dbget-bin/www_bget?ko:-	Q9FH76	349	1.3e-31	Abscisic acid 8'-hydroxylase 3 OS=Arabidopsis thaliana OX=3702 GN=CYP707A3 PE=1 SV=1	PF00067	Cytochrome P450	GO:0055114	oxidation-reduction process	GO:0016705//GO:0005506//GO:0020037	oxidoreductase activity, acting on paired donors, with incorporation or reduction of molecular oxygen//iron ion binding//heme binding	--	--	--	--	FALSE	-1.89113	0.0388167	FALSE	0.422117	0.796917	FALSE	-1.57643	0.0907399	FALSE	-1.88891	0.0495033	FALSE	-1.51358	0.170783
Cluster-11149.45162	0.6	1.15	0.46	18.69	25.32	822	747040459	XP_011082374.1	960	2.9e-101	premnaspirodiene oxygenase [Sesamum indicum]	XM_011084072.2	XM_011084072	390	0	PREDICTED: Sesamum indicum premnaspirodiene oxygenase (LOC105165137), mRNA	-	-	-	http://www.genome.jp/dbget-bin/www_bget?ko:-	A6YIH8	712	6.2e-74	Premnaspirodiene oxygenase OS=Hyoscyamus muticus OX=35626 GN=CYP71D55 PE=1 SV=1	PF00067	Cytochrome P450	GO:0055114	oxidation-reduction process	GO:0016705//GO:0020037//GO:0005506	oxidoreductase activity, acting on paired donors, with incorporation or reduction of molecular oxygen//heme binding//iron ion binding	--	--	--	--	DOWN	-3.79729	1.59e-10	FALSE	-0.836089	0.179091	DOWN	-4.74202	4.24e-16	DOWN	-4.28256	4.29e-11	DOWN	-5.16515	2.48e-16
Cluster-11149.3342	0	0.08	0.45	0.28	8.37	1325	747046368	XP_011099144.1	1947	1.6e-215	beta-amyrin 28-oxidase-like [Sesamum indicum]	XM_023023001.1	XM_023023001	399	0	PREDICTED: Olea europaea var. sylvestris beta-amyrin 28-oxidase-like (LOC111396592), mRNA	K20667	CYP716A	beta-amyrin 28-monooxygenase	http://www.genome.jp/dbget-bin/www_bget?ko:K20667	Q2MJ20	1195	9.9e-130	Beta-amyrin 28-monooxygenase OS=Medicago truncatula OX=3880 GN=CYP716A12 PE=1 SV=1	PF00067	Cytochrome P450	GO:0055114	oxidation-reduction process	GO:0020037//GO:0005506//GO:0016705	heme binding//iron ion binding//oxidoreductase activity, acting on paired donors, with incorporation or reduction of molecular oxygen	--	--	--	--	FALSE	-1.49159	0.651408	DOWN	-5.29616	1.18e-15	DOWN	-6.88426	3.89e-19	FALSE	-5.5387	0.148189	DOWN	-10.6096	6.64e-19
Cluster-11149.10738	0.81	0.79	0.44	0.08	1.31	1864	747103871	XP_011100144.1	1782	3.1e-196	alkane hydroxylase MAH1-like [Sesamum indicum]	XM_011101842.1	XM_011101842	492	0	PREDICTED: Sesamum indicum alkane hydroxylase MAH1-like (LOC105178378), mRNA	-	-	-	http://www.genome.jp/dbget-bin/www_bget?ko:-	Q9FVS9	851	1.1e-89	Alkane hydroxylase MAH1 OS=Arabidopsis thaliana OX=3702 GN=CYP96A15 PE=2 SV=1	PF00067	Cytochrome P450	GO:0055114	oxidation-reduction process	GO:0016705//GO:0005506//GO:0020037	oxidoreductase activity, acting on paired donors, with incorporation or reduction of molecular oxygen//iron ion binding//heme binding	--	--	--	--	UP	3.47842	0.00025306	DOWN	-4.39023	2.84e-07	FALSE	-1.0248	0.136525	UP	3.98081	3.02e-05	FALSE	-0.454426	0.621535
Cluster-11149.8309	0.22	1.9	0.44	4.71	2.94	767	848901170	XP_012850744.1	1016	8.6e-108	PREDICTED: cytochrome P450 CYP72A219-like [Erythranthe guttata]	XM_012995290.1	XM_012995290	296	2.48e-151	PREDICTED: Erythranthe guttatus cytochrome P450 CYP72A219-like (LOC105970463), mRNA	-	-	-	http://www.genome.jp/dbget-bin/www_bget?ko:-	H2DH21	814	8.6e-86	Cytochrome P450 CYP72A219 OS=Panax ginseng OX=4054 PE=2 SV=1	PF00067	Cytochrome P450	GO:0055114	oxidation-reduction process	GO:0020037//GO:0005506//GO:0016705	heme binding//iron ion binding//oxidoreductase activity, acting on paired donors, with incorporation or reduction of molecular oxygen	--	--	--	--	FALSE	-1.09197	0.19483	FALSE	0.278235	0.906373	FALSE	-0.923476	0.2599	DOWN	-3.70917	4.86e-05	DOWN	-3.47129	0.000277773
Cluster-11149.46461	0.42	0.55	0.43	0.47	1.03	965	1276258387	PIN15763.1	950	4.9e-100	Cytochrome P450 CYP4/CYP19/CYP26 subfamily [Handroanthus impetiginosus]	--	--	--	--	--	-	-	-	http://www.genome.jp/dbget-bin/www_bget?ko:-	Q84KI1	219	1.1e-16	Taxoid 14-beta-hydroxylase OS=Taxus cuspidata OX=99806 PE=1 SV=1	PF15966//PF00067	F-box//Cytochrome P450	GO:0055114	oxidation-reduction process	GO:0005515//GO:0016705//GO:0020037//GO:0005506	protein binding//oxidoreductase activity, acting on paired donors, with incorporation or reduction of molecular oxygen//heme binding//iron ion binding	--	--	--	--	FALSE	0.42754	0.999455	FALSE	-1.49553	0.234181	FALSE	-1.17689	0.243996	FALSE	0.478823	0.95664	FALSE	-1.06305	0.434143
Cluster-11149.42978	2.08	0.26	0.41	4.33	10.29	2102	747049710	XP_011070909.1	1123	9.2e-120	cytochrome P450 CYP749A22-like [Sesamum indicum]	XM_011072607.2	XM_011072607	429	0	PREDICTED: Sesamum indicum cytochrome P450 CYP749A22-like (LOC105156471), mRNA	-	-	-	http://www.genome.jp/dbget-bin/www_bget?ko:-	H2DH17	778	3.5e-81	Cytochrome P450 CYP749A22 OS=Panax ginseng OX=4054 PE=2 SV=1	PF00067	Cytochrome P450	GO:0055114	oxidation-reduction process	GO:0020037//GO:0005506//GO:0016705	heme binding//iron ion binding//oxidoreductase activity, acting on paired donors, with incorporation or reduction of molecular oxygen	--	--	--	--	DOWN	-3.86422	5.6e-10	DOWN	-1.64522	0.00159568	DOWN	-5.61723	2.16e-20	FALSE	-0.382421	0.778814	DOWN	-2.07734	3.74e-05
Cluster-11149.25146	0.39	1.73	0.4	0	1.58	1012	1276256033	PIN13797.1	1309	1.2e-141	Cytochrome P450 CYP2 subfamily [Handroanthus impetiginosus]	XM_011092302.2	XM_011092302	425	0	PREDICTED: Sesamum indicum cytochrome P450 CYP736A12-like (LOC105171249), mRNA	-	-	-	http://www.genome.jp/dbget-bin/www_bget?ko:-	A0A068Q5V6	920	5.8e-98	Cytochrome P450 71AU50 OS=Prunus mume OX=102107 GN=CYP71AU50 PE=2 SV=1	PF00067	Cytochrome P450	GO:0055114	oxidation-reduction process	GO:0020037//GO:0005506//GO:0016705	heme binding//iron ion binding//oxidoreductase activity, acting on paired donors, with incorporation or reduction of molecular oxygen	--	--	--	--	UP	8.05032	4.22e-06	DOWN	-8.04074	3.93e-06	FALSE	-0.171251	0.966358	FALSE	6.20629	0.0606833	FALSE	-1.77851	0.061162
Cluster-11149.43077	1.63	0.95	0.38	1.84	6.78	724	747093271	XP_011094433.1	645	8.5e-65	cytochrome P450 76A1-like [Sesamum indicum]	--	--	--	--	--	K20618	CYP76A	cytochrome P450 family 76 subfamily A	http://www.genome.jp/dbget-bin/www_bget?ko:K20618	W8JIS5	473	2.8e-46	Iridoid oxidase OS=Catharanthus roseus OX=4058 GN=IO PE=1 SV=1	PF00067	Cytochrome P450	GO:0055114	oxidation-reduction process	GO:0016705//GO:0020037//GO:0005506	oxidoreductase activity, acting on paired donors, with incorporation or reduction of molecular oxygen//heme binding//iron ion binding	--	--	--	--	FALSE	-0.733256	0.640627	DOWN	-2.26887	0.000375237	DOWN	-3.11031	2.81e-06	FALSE	0.482481	0.806498	FALSE	-1.83459	0.00527912
Cluster-11149.44263	0.06	0.19	0.34	1.81	2.12	1670	747107068	XP_011101836.1	1958	1.1e-216	cytochrome P450 724B1 [Sesamum indicum]	XM_011103534.2	XM_011103534	702	0	PREDICTED: Sesamum indicum cytochrome P450 724B1 (LOC105179881), mRNA	K12639	CYP724B1, D11	cytochrome P450 family 724 subfamily B polypeptide 1	http://www.genome.jp/dbget-bin/www_bget?ko:K12639	Q6F4F5	1310	5.8e-143	Cytochrome P450 724B1 OS=Oryza sativa subsp. japonica OX=39947 GN=CYP724B1 PE=1 SV=1	PF00067	Cytochrome P450	GO:0055114	oxidation-reduction process	GO:0005506//GO:0020037//GO:0016705	iron ion binding//heme binding//oxidoreductase activity, acting on paired donors, with incorporation or reduction of molecular oxygen	--	--	--	--	DOWN	-3.05803	0.000101663	FALSE	-0.622008	0.467849	DOWN	-3.78567	1.36e-07	DOWN	-4.18738	2.36e-05	DOWN	-4.84597	1.57e-08
Cluster-15198.0	0.32	0.44	0.33	0	0.87	647	1238790550	ASW21048.1	849	1.7e-88	cytochrome P450 CYP71D1 (chromoplast) [Scutellaria baicalensis]	CP032244.1	CP032244	105	3.11e-45	Gossypioides kirkii chromosome KI_01	-	-	-	http://www.genome.jp/dbget-bin/www_bget?ko:-	O48923	673	1.6e-69	Cytochrome P450 71D10 OS=Glycine max OX=3847 GN=CYP71D10 PE=2 SV=1	PF00067	Cytochrome P450	GO:0055114	oxidation-reduction process	GO:0016705//GO:0005506//GO:0020037	oxidoreductase activity, acting on paired donors, with incorporation or reduction of molecular oxygen//iron ion binding//heme binding	--	--	--	--	FALSE	5.17838	0.380656	FALSE	-6.24701	0.036604	FALSE	-1.24332	0.517719	FALSE	5.00971	0.362672	FALSE	-1.17955	0.461357
Cluster-11149.12668	0	0.44	0.31	1.87	1.47	952	747042658	XP_011079634.1	204	1.5e-13	cytochrome P450 71A1 [Sesamum indicum]	--	--	--	--	--	K20623	CYP92A6	typhasterol/6-deoxotyphasterol 2alpha-hydroxylase	http://www.genome.jp/dbget-bin/www_bget?ko:K20623	X2ESR4	156	2.1e-09	Cytochrome P450 Tp4149 OS=Tanacetum parthenium OX=127999 PE=2 SV=1	--	--	--	--	--	--	--	--	--	--	FALSE	-1.86604	0.0536219	FALSE	-0.0551643	1	FALSE	-2.02802	0.0208594	DOWN	-7.66131	0.000361159	DOWN	-7.4943	6.05e-05
Cluster-11149.45224	0.38	1.25	0.29	4.03	4.52	701	848910144	XP_012853741.1	755	1.4e-77	PREDICTED: 7-ethoxycoumarin O-deethylase-like [Erythranthe guttata]	XM_011072429.2	XM_011072429	207	6.74e-102	PREDICTED: Sesamum indicum cytochrome P450 76C1-like (LOC105156334), mRNA	-	-	-	http://www.genome.jp/dbget-bin/www_bget?ko:-	O64636	502	1.2e-49	Cytochrome P450 76C1 OS=Arabidopsis thaliana OX=3702 GN=CYP76C1 PE=2 SV=1	PF00067	Cytochrome P450	GO:0055114	oxidation-reduction process	GO:0016705//GO:0005506//GO:0020037	oxidoreductase activity, acting on paired donors, with incorporation or reduction of molecular oxygen//iron ion binding//heme binding	--	--	--	--	FALSE	-1.46395	0.0901432	FALSE	-0.561302	0.621518	DOWN	-2.1339	0.00197581	DOWN	-2.71353	0.00407161	DOWN	-3.31827	0.00012962
Cluster-11149.39253	1.09	0.65	0.29	0.46	7.37	1797	747045757	XP_011095827.1	2097	9e-233	flavonoid 3'-monooxygenase-like [Sesamum indicum]	LC199945.1	LC199945	580	0	Sesamum indicum LOC105175177 mRNA for hypothetical protein, complete cds	-	-	-	http://www.genome.jp/dbget-bin/www_bget?ko:-	A0A1D6F9Y9	1105	3.7e-119	Trimethyltridecatetraene synthase OS=Zea mays OX=4577 GN=CYP92C6 PE=1 SV=1	PF00067	Cytochrome P450	GO:0055114	oxidation-reduction process	GO:0005506//GO:0020037//GO:0016705	iron ion binding//heme binding//oxidoreductase activity, acting on paired donors, with incorporation or reduction of molecular oxygen	--	--	--	--	FALSE	0.695588	0.602297	DOWN	-4.37551	1.34e-13	DOWN	-3.78987	7.59e-12	FALSE	1.90421	0.0118983	DOWN	-2.51984	2.06e-06
Cluster-11149.9539	0.52	0.39	0.28	1.37	1.58	3560	747105742	XP_011101146.1	2263	1e-251	pentatricopeptide repeat-containing protein At5g66520-like [Sesamum indicum]	XM_011102844.2	XM_011102844	1009	0	PREDICTED: Sesamum indicum pentatricopeptide repeat-containing protein At5g66520-like (LOC105179241), mRNA	-	-	-	http://www.genome.jp/dbget-bin/www_bget?ko:-	Q50EK3	1312	7.2e-143	Cytochrome P450 704C1 OS=Pinus taeda OX=3352 GN=CYP704C1 PE=2 SV=1	PF00637//PF00067	Region in Clathrin and VPS//Cytochrome P450	GO:0006886//GO:0055114//GO:0016192	intracellular protein transport//oxidation-reduction process//vesicle-mediated transport	GO:0020037//GO:0005506//GO:0016705	heme binding//iron ion binding//oxidoreductase activity, acting on paired donors, with incorporation or reduction of molecular oxygen	--	--	--	--	FALSE	-1.62918	0.0111698	FALSE	-0.599847	0.453748	DOWN	-2.33883	3.89e-05	FALSE	-0.716727	0.372308	FALSE	-1.36606	0.0197576
Cluster-16089.0	0	1.69	0.27	0	0.57	401	747068532	XP_011081025.1	592	6.5e-59	cytochrome P450 87A3-like [Sesamum indicum]	XM_011073901.2	XM_011073901	264	7.65e-134	PREDICTED: Sesamum indicum cytochrome P450 87A3 (LOC105157494), mRNA	-	-	-	http://www.genome.jp/dbget-bin/www_bget?ko:-	Q7XU38	443	4.7e-43	Cytochrome P450 87A3 OS=Oryza sativa subsp. japonica OX=39947 GN=CYP87A3 PE=2 SV=3	PF00067	Cytochrome P450	GO:0055114	oxidation-reduction process	GO:0005506//GO:0020037//GO:0016705	iron ion binding//heme binding//oxidoreductase activity, acting on paired donors, with incorporation or reduction of molecular oxygen	--	--	--	--	FALSE	5.75	0.158449	FALSE	-4.3029	0.796404	FALSE	1.26647	0.517719	FALSE	0	1	FALSE	-3.99477	0.718417
Cluster-10523.0	0.36	0.73	0.27	1.31	1.92	1889	848876593	XP_012838752.1	1870	2e-206	PREDICTED: ferruginol synthase-like [Erythranthe guttata]	XM_012983298.1	XM_012983298	543	0	PREDICTED: Erythranthe guttatus ferruginol synthase-like (LOC105959240), mRNA	-	-	-	http://www.genome.jp/dbget-bin/www_bget?ko:-	S4UX02	1404	8.2e-154	Ferruginol synthase OS=Salvia miltiorrhiza OX=226208 GN=CYP76AH1 PE=1 SV=1	PF00067	Cytochrome P450	GO:0055114	oxidation-reduction process	GO:0016705//GO:0020037//GO:0005506	oxidoreductase activity, acting on paired donors, with incorporation or reduction of molecular oxygen//heme binding//iron ion binding	--	--	--	--	FALSE	-0.651424	0.566119	FALSE	-0.940108	0.207085	FALSE	-1.70141	0.00526875	FALSE	-1.18026	0.170562	DOWN	-2.16856	0.000979477
Cluster-16883.0	0.38	0.56	0.27	0.02	4.99	2044	745791051	AJD25234.1	2094	2.3e-232	cytochrome P450 CYP704A98 [Salvia miltiorrhiza]	XM_020696406.1	XM_020696406	879	0	PREDICTED: Sesamum indicum cytochrome P450 704C1 (LOC105174253), transcript variant X2, mRNA	-	-	-	http://www.genome.jp/dbget-bin/www_bget?ko:-	Q50EK3	1312	4.1e-143	Cytochrome P450 704C1 OS=Pinus taeda OX=3352 GN=CYP704C1 PE=2 SV=1	PF00067	Cytochrome P450	GO:0055114	oxidation-reduction process	GO:0016705//GO:0020037//GO:0005506	oxidoreductase activity, acting on paired donors, with incorporation or reduction of molecular oxygen//heme binding//iron ion binding	--	--	--	--	UP	4.61011	0.000394224	DOWN	-7.93267	9.14e-20	DOWN	-3.44063	5.85e-10	UP	4.48141	0.000493704	DOWN	-3.4863	3.12e-09
Cluster-11149.3847	0.3	0.58	0.26	8.38	16.26	1091	747040459	XP_011082374.1	1456	1.2e-158	premnaspirodiene oxygenase [Sesamum indicum]	XM_011084072.2	XM_011084072	434	0	PREDICTED: Sesamum indicum premnaspirodiene oxygenase (LOC105165137), mRNA	-	-	-	http://www.genome.jp/dbget-bin/www_bget?ko:-	A6YIH8	1023	7.2e-110	Premnaspirodiene oxygenase OS=Hyoscyamus muticus OX=35626 GN=CYP71D55 PE=1 SV=1	PF00067	Cytochrome P450	GO:0055114	oxidation-reduction process	GO:0005506//GO:0020037//GO:0016705	iron ion binding//heme binding//oxidoreductase activity, acting on paired donors, with incorporation or reduction of molecular oxygen	--	--	--	--	DOWN	-3.64266	1.04e-08	FALSE	-1.35396	0.0136165	DOWN	-5.10449	2.54e-17	DOWN	-4.0938	3.44e-09	DOWN	-5.49306	7.36e-17
Cluster-11149.45255	0.41	0.37	0.26	23.92	25.76	1808	1276245277	PIN05415.1	1907	9.7e-211	Cytochrome P450 CYP2 subfamily [Handroanthus impetiginosus]	--	--	--	--	--	-	-	-	http://www.genome.jp/dbget-bin/www_bget?ko:-	O49858	1081	2.2e-116	Cytochrome P450 82A3 OS=Glycine max OX=3847 GN=CYP82A3 PE=2 SV=1	PF17257//PF00067	Family of unknown function (DUF5323)//Cytochrome P450	GO:0055114//GO:0006412//GO:0042254	oxidation-reduction process//translation//ribosome biogenesis	GO:0020037//GO:0016705//GO:0019843//GO:0005506//GO:0003735	heme binding//oxidoreductase activity, acting on paired donors, with incorporation or reduction of molecular oxygen//rRNA binding//iron ion binding//structural constituent of ribosome	GO:0009507//GO:0005840	chloroplast//ribosome	--	--	DOWN	-5.81016	2.89e-22	FALSE	-0.503471	0.50523	DOWN	-6.4219	1.5e-26	DOWN	-5.1917	6.37e-19	DOWN	-5.74329	1.69e-22
Cluster-11149.46472	0	0.9	0.26	8.83	96.05	589	1276235239	PIM98731.1	882	2.3e-92	Cytochrome P450 CYP2 subfamily [Handroanthus impetiginosus]	--	--	--	--	--	-	-	-	http://www.genome.jp/dbget-bin/www_bget?ko:-	Q9FXW4	413	2.1e-39	Probable (S)-N-methylcoclaurine 3'-hydroxylase isozyme 2 OS=Coptis japonica OX=3442 GN=CYP80B2 PE=2 SV=1	PF00067	Cytochrome P450	GO:0055114	oxidation-reduction process	GO:0016705//GO:0005506//GO:0020037	oxidoreductase activity, acting on paired donors, with incorporation or reduction of molecular oxygen//iron ion binding//heme binding	--	--	--	--	DOWN	-3.04805	4.07e-05	DOWN	-3.84068	1.53e-13	DOWN	-6.99499	3.94e-27	DOWN	-8.84287	3.31e-08	DOWN	-12.4601	6.9e-31
Cluster-11149.6935	2.06	0.64	0.25	1.17	0.39	1690	747047565	XP_011069758.1	1912	2.4e-211	isoflavone 2'-hydroxylase-like [Sesamum indicum]	XM_011071456.2	XM_011071456	698	0	PREDICTED: Sesamum indicum isoflavone 2'-hydroxylase-like (LOC105155566), mRNA	-	-	-	http://www.genome.jp/dbget-bin/www_bget?ko:-	W8JMU7	1094	6.5e-118	Cytochrome P450 81Q32 OS=Catharanthus roseus OX=4058 GN=CYP81Q32 PE=2 SV=1	PF00067	Cytochrome P450	GO:0055114	oxidation-reduction process	GO:0005506//GO:0020037//GO:0016705	iron ion binding//heme binding//oxidoreductase activity, acting on paired donors, with incorporation or reduction of molecular oxygen	--	--	--	--	FALSE	-0.662829	0.566119	FALSE	1.1902	0.180893	FALSE	0.417202	0.790529	FALSE	1.48308	0.0242139	UP	2.62108	6.67e-05
Cluster-11149.6330	13.5	1.13	0.25	6.35	1.36	603	1276271721	PIN27094.1	720	1.4e-73	Cytochrome P450 CYP2 subfamily [Handroanthus impetiginosus]	XM_012998287.1	XM_012998287	165	1.28e-78	PREDICTED: Erythranthe guttatus 7-ethoxycoumarin O-deethylase-like (LOC105973266), mRNA	-	-	-	http://www.genome.jp/dbget-bin/www_bget?ko:-	A0A068Q5V6	395	2.6e-37	Cytochrome P450 71AU50 OS=Prunus mume OX=102107 GN=CYP71AU50 PE=2 SV=1	PF02128//PF00067	Fungalysin metallopeptidase (M36)//Cytochrome P450	GO:0055114	oxidation-reduction process	GO:0004222//GO:0016705//GO:0008270//GO:0020037//GO:0005506	metalloendopeptidase activity//oxidoreductase activity, acting on paired donors, with incorporation or reduction of molecular oxygen//zinc ion binding//heme binding//iron ion binding	GO:0005615	extracellular space	--	--	DOWN	-2.25382	0.00311525	FALSE	1.81286	0.0191777	FALSE	-0.549169	0.773448	UP	1.74776	0.00287515	UP	3.50769	3.08e-08
Cluster-11149.3958	0.24	0.43	0.25	3.21	33.7	962	1276261446	PIN18284.1	925	3.8e-97	Cytochrome P450 CYP2 subfamily [Handroanthus impetiginosus]	--	--	--	--	--	-	-	-	http://www.genome.jp/dbget-bin/www_bget?ko:-	D1MI46	423	2.4e-40	geraniol 8-hydroxylase OS=Swertia mussotii OX=137888 GN=CYP76B10 PE=1 SV=1	PF00067	Cytochrome P450	GO:0055114	oxidation-reduction process	GO:0005506//GO:0020037//GO:0016705	iron ion binding//heme binding//oxidoreductase activity, acting on paired donors, with incorporation or reduction of molecular oxygen	--	--	--	--	DOWN	-2.66404	0.000724176	DOWN	-3.78575	7.64e-13	DOWN	-6.55609	3.43e-24	DOWN	-3.04546	0.00051141	DOWN	-6.87396	3.39e-23
Cluster-11149.46469	0	0.36	0.24	2.23	56.9	612	1276234230	PIM98211.1	390	2.6e-35	Cytochrome P450 CYP2 subfamily [Handroanthus impetiginosus]	--	--	--	--	--	-	-	-	http://www.genome.jp/dbget-bin/www_bget?ko:-	B4FVP3	227	8e-18	Zealexin A1 synthase OS=Zea mays OX=4577 GN=CYP71Z18 PE=1 SV=1	PF00067	Cytochrome P450	GO:0055114	oxidation-reduction process	GO:0016705//GO:0005506//GO:0020037	oxidoreductase activity, acting on paired donors, with incorporation or reduction of molecular oxygen//iron ion binding//heme binding	--	--	--	--	FALSE	-2.35575	0.0412473	DOWN	-5.06405	3.71e-18	DOWN	-7.52045	9.7e-26	DOWN	-6.95954	0.00172432	DOWN	-11.7996	1.94e-26
Cluster-11149.1200	0	0.24	0.23	0	2.13	432	747057892	XP_011075268.1	579	2.3e-57	cytochrome P450 93A3-like [Sesamum indicum]	XM_018983921.1	XM_018983921	109	1.21e-47	PREDICTED: Juglans regia cytochrome P450 93A3-like (LOC109005129), mRNA	-	-	-	http://www.genome.jp/dbget-bin/www_bget?ko:-	O81973	432	9.6e-42	Cytochrome P450 93A3 OS=Glycine max OX=3847 GN=CYP93A3 PE=2 SV=1	PF00067	Cytochrome P450	GO:0055114	oxidation-reduction process	GO:0005506//GO:0020037//GO:0016705	iron ion binding//heme binding//oxidoreductase activity, acting on paired donors, with incorporation or reduction of molecular oxygen	--	--	--	--	FALSE	3.29321	1	FALSE	-6.41483	0.0234343	FALSE	-3.2746	0.0603836	FALSE	0	1	FALSE	-6.09253	0.0245024
Cluster-7320.1	0	0.52	0.23	1.22	2.26	1602	1276241617	PIN02757.1	1643	3.5e-180	Cytochrome P450 CYP2 subfamily [Handroanthus impetiginosus]	XM_012982281.1	XM_012982281	76	1.05e-28	PREDICTED: Erythranthe guttatus probable (S)-N-methylcoclaurine 3'-hydroxylase isozyme 2 (LOC105958275), mRNA	-	-	-	http://www.genome.jp/dbget-bin/www_bget?ko:-	Q9FXW4	858	1.4e-90	Probable (S)-N-methylcoclaurine 3'-hydroxylase isozyme 2 OS=Coptis japonica OX=3442 GN=CYP80B2 PE=2 SV=1	PF02914//PF00067	Bacteriophage Mu transposase//Cytochrome P450	GO:0015074//GO:0055114//GO:0006313	DNA integration//oxidation-reduction process//transposition, DNA-mediated	GO:0004803//GO:0005506//GO:0016705//GO:0020037//GO:0003677	transposase activity//iron ion binding//oxidoreductase activity, acting on paired donors, with incorporation or reduction of molecular oxygen//heme binding//DNA binding	--	--	--	--	FALSE	-1.01632	0.320113	FALSE	-1.28587	0.0536848	DOWN	-2.41129	0.000143455	DOWN	-7.99106	3.58e-05	DOWN	-9.05378	1.32e-10
Cluster-11149.44041	0.33	0.2	0.23	10.42	56.3	1780	747044430	XP_011089001.1	1359	3.4e-147	geraniol 8-hydroxylase-like [Sesamum indicum]	--	--	--	--	--	-	-	-	http://www.genome.jp/dbget-bin/www_bget?ko:-	W8JMV1	1268	4.6e-138	Cytochrome P450 76T24 OS=Catharanthus roseus OX=4058 GN=CYP76T24 PE=2 SV=1	PF00067	Cytochrome P450	GO:0055114	oxidation-reduction process	GO:0005506//GO:0020037//GO:0016705	iron ion binding//heme binding//oxidoreductase activity, acting on paired donors, with incorporation or reduction of molecular oxygen	--	--	--	--	DOWN	-5.46827	1.96e-17	DOWN	-2.82916	5.92e-09	DOWN	-8.40357	6.88e-37	DOWN	-4.28707	1.18e-12	DOWN	-7.16384	1.66e-31
Cluster-11149.48107	0.72	1.26	0.22	0.14	0.44	842	1600686769	TEY68755.1	1090	2.5e-116	fatty acid omega-hydroxylase [Salvia splendens]	KP337724.1	KP337724	205	1.06e-100	Salvia miltiorrhiza cytochrome P450 CYP94A48 mRNA, complete cds	-	-	-	http://www.genome.jp/dbget-bin/www_bget?ko:-	O81117	909	9.1e-97	Cytochrome P450 94A1 OS=Vicia sativa OX=3908 GN=CYP94A1 PE=2 SV=2	PF00067	Cytochrome P450	GO:0055114	oxidation-reduction process	GO:0020037//GO:0005506//GO:0016705	heme binding//iron ion binding//oxidoreductase activity, acting on paired donors, with incorporation or reduction of molecular oxygen	--	--	--	--	FALSE	3.2658	0.0167668	FALSE	-1.93524	0.485866	FALSE	1.21555	0.310133	FALSE	2.90806	0.0435028	FALSE	0.926423	0.623033
Cluster-11149.4444	0.04	0.28	0.22	8.94	6.24	1862	848910144	XP_012853741.1	1490	2.3e-162	PREDICTED: 7-ethoxycoumarin O-deethylase-like [Erythranthe guttata]	XM_011071426.2	XM_011071426	358	0	PREDICTED: Sesamum indicum geraniol 8-hydroxylase-like (LOC105155529), mRNA	-	-	-	http://www.genome.jp/dbget-bin/www_bget?ko:-	O64637	750	5.5e-78	Cytochrome P450 76C2 OS=Arabidopsis thaliana OX=3702 GN=CYP76C2 PE=2 SV=1	PF02128//PF00067	Fungalysin metallopeptidase (M36)//Cytochrome P450	GO:0055114	oxidation-reduction process	GO:0005506//GO:0020037//GO:0008270//GO:0004222//GO:0016705	iron ion binding//heme binding//zinc ion binding//metalloendopeptidase activity//oxidoreductase activity, acting on paired donors, with incorporation or reduction of molecular oxygen	GO:0005615	extracellular space	--	--	DOWN	-4.77067	9.69e-15	FALSE	0.121273	1	DOWN	-4.75705	1.13e-14	DOWN	-7.03573	1.96e-18	DOWN	-6.94691	1.16e-17
Cluster-11149.44933	0.2	0.43	0.21	3.49	10.69	1904	1276247119	PIN06798.1	2079	1.2e-230	Cytochrome P450 CYP2 subfamily [Handroanthus impetiginosus]	--	--	--	--	--	K20618	CYP76A	cytochrome P450 family 76 subfamily A	http://www.genome.jp/dbget-bin/www_bget?ko:K20618	W8JIS5	1063	2.9e-114	Iridoid oxidase OS=Catharanthus roseus OX=4058 GN=IO PE=1 SV=1	PF00067	Cytochrome P450	GO:0055114	oxidation-reduction process	GO:0016705//GO:0020037//GO:0005506	oxidoreductase activity, acting on paired donors, with incorporation or reduction of molecular oxygen//heme binding//iron ion binding	--	--	--	--	DOWN	-2.82535	4.66e-06	DOWN	-2.00848	8.61e-05	DOWN	-4.94264	1.53e-17	DOWN	-3.40314	7.67e-07	DOWN	-5.45804	3.75e-18
Cluster-11149.8251	1.83	0.2	0.2	1.2	2.84	462	848888238	XP_012844328.1	656	2.9e-66	PREDICTED: cytochrome P450 CYP72A219-like [Erythranthe guttata]	XM_012988874.1	XM_012988874	173	3.44e-83	PREDICTED: Erythranthe guttatus cytochrome P450 CYP72A219-like (LOC105964346), mRNA	-	-	-	http://www.genome.jp/dbget-bin/www_bget?ko:-	U5NE19	549	2.8e-55	7-deoxyloganic acid hydroxylase OS=Catharanthus roseus OX=4058 GN=7DLH PE=1 SV=1	PF00067	Cytochrome P450	GO:0055114	oxidation-reduction process	GO:0016705//GO:0020037//GO:0005506	oxidoreductase activity, acting on paired donors, with incorporation or reduction of molecular oxygen//heme binding//iron ion binding	--	--	--	--	FALSE	-2.19825	0.394512	FALSE	-1.62395	0.202227	FALSE	-3.90562	0.00847412	FALSE	1.24303	0.418237	FALSE	-0.42803	0.930059
Cluster-11149.36478	0.4	0.99	0.2	0.2	4.13	467	1600634215	TEY19913.1	228	1.2e-16	hypothetical protein Saspl_047044 [Salvia splendens]	XM_012999283.1	XM_012999283	74	3.77e-28	PREDICTED: Erythranthe guttatus flavonoid 3'-monooxygenase-like (LOC105974218), mRNA	-	-	-	http://www.genome.jp/dbget-bin/www_bget?ko:-	Q9SD85	159	4.7e-10	Flavonoid 3'-monooxygenase OS=Arabidopsis thaliana OX=3702 GN=CYP75B1 PE=1 SV=1	PF00067	Cytochrome P450	GO:0055114	oxidation-reduction process	GO:0016705//GO:0005506//GO:0020037	oxidoreductase activity, acting on paired donors, with incorporation or reduction of molecular oxygen//iron ion binding//heme binding	--	--	--	--	FALSE	2.42245	0.565463	DOWN	-4.616	0.000743387	FALSE	-2.30692	0.0117708	FALSE	1.54048	1	DOWN	-3.10032	0.00495917
Cluster-11149.41136	0.3	0.63	0.19	9.72	9.63	955	604341205	EYU40571.1	895	1.1e-93	hypothetical protein MIMGU_mgv1a023091mg [Erythranthe guttata]	--	--	--	--	--	-	-	-	http://www.genome.jp/dbget-bin/www_bget?ko:-	A0A4D6Q414	547	9.8e-55	Flavonoid 3',5'-hydroxylase CYP75B138 OS=Crocosmia x crocosmiiflora OX=1053288 GN=CYP75B138 PE=1 SV=1	PF00067	Cytochrome P450	GO:0055114	oxidation-reduction process	GO:0005506//GO:0020037//GO:0016705	iron ion binding//heme binding//oxidoreductase activity, acting on paired donors, with incorporation or reduction of molecular oxygen	--	--	--	--	DOWN	-3.71537	8.29e-09	FALSE	-0.384467	0.70386	DOWN	-4.2075	1.97e-11	DOWN	-4.3074	1.9e-09	DOWN	-4.73637	1.3e-11
Cluster-11149.10143	0.41	0.11	0.19	4.3	16.33	2662	1276270614	PIN26123.1	921	3.1e-96	Cytochrome P450 CYP2 subfamily [Handroanthus impetiginosus]	NM_001319691.1	AB194714	248	4.29e-124	Sesamum indicum cytochrome P450 81E8-like (LOC105177765), mRNA >dbj|AB194714.1| Sesamum indicum CYP81Q1 mRNA for cytochrome P450, complete cds	-	-	-	http://www.genome.jp/dbget-bin/www_bget?ko:-	W8JMU7	745	3e-77	Cytochrome P450 81Q32 OS=Catharanthus roseus OX=4058 GN=CYP81Q32 PE=2 SV=1	PF00067	Cytochrome P450	GO:0055114	oxidation-reduction process	GO:0020037//GO:0005506//GO:0016705	heme binding//iron ion binding//oxidoreductase activity, acting on paired donors, with incorporation or reduction of molecular oxygen	--	--	--	--	DOWN	-5.07923	3.28e-14	DOWN	-2.32063	2.45e-06	DOWN	-7.50521	1.08e-29	DOWN	-2.72708	2.33e-06	DOWN	-5.09646	6.04e-20
Cluster-11149.7362	0.28	0.05	0.19	7.17	17.99	3899	81157970	BAE48235.1	1143	8.2e-122	cytochrome P450 [Sesamum radiatum]	--	--	--	--	--	-	-	-	http://www.genome.jp/dbget-bin/www_bget?ko:-	W8JMU7	631	7.3e-64	Cytochrome P450 81Q32 OS=Catharanthus roseus OX=4058 GN=CYP81Q32 PE=2 SV=1	PF00067//PF00609	Cytochrome P450//Diacylglycerol kinase accessory domain	GO:0055114//GO:0009395//GO:0046486//GO:0007205	oxidation-reduction process//phospholipid catabolic process//glycerolipid metabolic process//protein kinase C-activating G protein-coupled receptor signaling pathway	GO:0004143//GO:0016705//GO:0020037//GO:0005506	diacylglycerol kinase activity//oxidoreductase activity, acting on paired donors, with incorporation or reduction of molecular oxygen//heme binding//iron ion binding	--	--	--	--	DOWN	-6.97446	7.74e-24	DOWN	-1.7234	0.000560695	DOWN	-8.80057	2.29e-36	DOWN	-4.00879	4.11e-13	DOWN	-5.781	1.5e-24
Cluster-11149.4578	0.52	0.23	0.18	13.22	3.89	1944	747083599	XP_011089169.1	1299	3.3e-140	beta-amyrin 28-oxidase [Sesamum indicum]	XM_011090867.2	XM_011090867	359	0	PREDICTED: Sesamum indicum beta-amyrin 28-oxidase (LOC105170203), mRNA	K20667	CYP716A	beta-amyrin 28-monooxygenase	http://www.genome.jp/dbget-bin/www_bget?ko:K20667	I7C6E8	909	2.1e-96	Beta-amyrin 28-monooxygenase OS=Panax ginseng OX=4054 GN=CYP716A52v2 PE=1 SV=1	PF00067	Cytochrome P450	GO:0055114	oxidation-reduction process	GO:0016705//GO:0020037//GO:0005506	oxidoreductase activity, acting on paired donors, with incorporation or reduction of molecular oxygen//heme binding//iron ion binding	--	--	--	--	DOWN	-5.60101	1.44e-19	FALSE	1.36992	0.0116806	DOWN	-4.3383	1.18e-11	DOWN	-3.9748	1.23e-12	DOWN	-2.65375	4.85e-06
Cluster-11149.45316	0.19	0.27	0.17	18.98	224.77	2018	747055279	XP_011073878.1	1182	1.3e-126	premnaspirodiene oxygenase-like [Sesamum indicum]	XM_011075576.2	XM_011075576	328	1.09e-168	PREDICTED: Sesamum indicum premnaspirodiene oxygenase-like (LOC105158737), mRNA	-	-	-	http://www.genome.jp/dbget-bin/www_bget?ko:-	A6YIH8	699	4.9e-72	Premnaspirodiene oxygenase OS=Hyoscyamus muticus OX=35626 GN=CYP71D55 PE=1 SV=1	PF00067	Cytochrome P450	GO:0055114	oxidation-reduction process	GO:0016705//GO:0005506//GO:0020037	oxidoreductase activity, acting on paired donors, with incorporation or reduction of molecular oxygen//iron ion binding//heme binding	--	--	--	--	DOWN	-5.89836	4.72e-22	DOWN	-3.96167	1.61e-15	DOWN	-9.96783	8.19e-51	DOWN	-5.94005	4.12e-21	DOWN	-9.94814	3.63e-49
Cluster-11149.14621	1.45	1.22	0.16	0.86	0.45	3097	747088543	XP_011091865.1	460	1e-42	cytochrome P450 734A1 [Sesamum indicum]	--	--	--	--	--	-	-	-	http://www.genome.jp/dbget-bin/www_bget?ko:-	Q9LUC9	137	1.1e-06	Cytochrome P450 72A11 OS=Arabidopsis thaliana OX=3702 GN=CYP72A11 PE=2 SV=1	PF00067	Cytochrome P450	GO:0055114	oxidation-reduction process	GO:0016705//GO:0005506//GO:0020037	oxidoreductase activity, acting on paired donors, with incorporation or reduction of molecular oxygen//iron ion binding//heme binding	--	--	--	--	FALSE	0.708394	0.415498	FALSE	0.524878	0.664409	FALSE	1.12243	0.0854318	FALSE	1.43361	0.0187782	UP	1.90773	0.00130522
Cluster-11149.42721	0.41	1.93	0.14	0	0.68	566	747068532	XP_011081025.1	943	1.8e-99	cytochrome P450 87A3-like [Sesamum indicum]	XM_012990917.1	XM_012990917	377	0	PREDICTED: Erythranthe guttatus cytochrome P450 87A3 (LOC105966359), mRNA	-	-	-	http://www.genome.jp/dbget-bin/www_bget?ko:-	Q7XU38	671	2.4e-69	Cytochrome P450 87A3 OS=Oryza sativa subsp. japonica OX=39947 GN=CYP87A3 PE=2 SV=3	PF00067	Cytochrome P450	GO:0055114	oxidation-reduction process	GO:0005506//GO:0020037//GO:0016705	iron ion binding//heme binding//oxidoreductase activity, acting on paired donors, with incorporation or reduction of molecular oxygen	--	--	--	--	UP	6.957	0.00292787	FALSE	-5.58029	0.144338	FALSE	1.19561	0.426761	FALSE	5.00971	0.362672	FALSE	-0.515649	0.939472
Cluster-11149.2380	0.03	0	0.13	2.08	3.05	1590	604303056	EYU22581.1	1958	1e-216	hypothetical protein MIMGU_mgv1a004745mg [Erythranthe guttata]	CP032246.1	CP032246	51	8.25e-15	Gossypioides kirkii chromosome KI_03	-	-	-	http://www.genome.jp/dbget-bin/www_bget?ko:-	H2DH17	1536	3.4e-169	Cytochrome P450 CYP749A22 OS=Panax ginseng OX=4054 PE=2 SV=1	PF09223//PF00067	ZinT (YodA) periplasmic lipocalin-like zinc-recruitment//Cytochrome P450	GO:0055114	oxidation-reduction process	GO:0020037//GO:0005506//GO:0016705//GO:0008270	heme binding//iron ion binding//oxidoreductase activity, acting on paired donors, with incorporation or reduction of molecular oxygen//zinc ion binding	--	--	--	--	DOWN	-8.92144	1.08e-09	FALSE	-0.948601	0.17072	DOWN	-9.71371	9.59e-14	DOWN	-5.23608	5.78e-07	DOWN	-6.20873	2.03e-11
Cluster-11149.521	0.17	0.3	0.12	0.64	2.06	982	604306650	EYU25446.1	1163	9.9e-125	hypothetical protein MIMGU_mgv1a005044mg [Erythranthe guttata]	XM_012996081.1	XM_012996081	224	3.4e-111	PREDICTED: Erythranthe guttatus ferruginol synthase-like (LOC105971230), mRNA	-	-	-	http://www.genome.jp/dbget-bin/www_bget?ko:-	W8JMV1	913	3.7e-97	Cytochrome P450 76T24 OS=Catharanthus roseus OX=4058 GN=CYP76T24 PE=2 SV=1	PF00067	Cytochrome P450	GO:0055114	oxidation-reduction process	GO:0016705//GO:0005506//GO:0020037	oxidoreductase activity, acting on paired donors, with incorporation or reduction of molecular oxygen//iron ion binding//heme binding	--	--	--	--	FALSE	-0.858962	0.841342	FALSE	-2.08022	0.00905463	DOWN	-3.04462	0.000193533	FALSE	-1.16974	0.652387	DOWN	-3.2904	0.000277773
Cluster-5112.0	0.24	0.22	0.12	1.91	4.24	1680	747051778	XP_011071981.1	1529	6.1e-167	cytochrome P450 71A8-like [Sesamum indicum]	--	--	--	--	--	K07418	CYP2J	cytochrome P450 family 2 subfamily J	http://www.genome.jp/dbget-bin/www_bget?ko:K07418	Q42716	1261	2.8e-137	Cytochrome P450 71A8 OS=Mentha piperita OX=34256 GN=CYP71A8 PE=3 SV=1	PF00067	Cytochrome P450	GO:0055114	oxidation-reduction process	GO:0020037//GO:0005506//GO:0016705	heme binding//iron ion binding//oxidoreductase activity, acting on paired donors, with incorporation or reduction of molecular oxygen	--	--	--	--	DOWN	-2.9278	0.000103661	FALSE	-1.54254	0.00772334	DOWN	-4.57666	4.92e-12	DOWN	-2.32616	0.00282536	DOWN	-3.91519	2.09e-09
Cluster-11149.3113	0	0.24	0.12	2.11	5.6	1711	747070309	XP_011081970.1	1175	7e-126	(S)-N-methylcoclaurine 3'-hydroxylase isozyme 1-like [Sesamum indicum]	XM_015303006.1	XM_015303006	155	1.37e-72	PREDICTED: Solanum tuberosum probable (S)-N-methylcoclaurine 3'-hydroxylase isozyme 2 (LOC102578606), mRNA	-	-	-	http://www.genome.jp/dbget-bin/www_bget?ko:-	Q9FXW4	713	9.9e-74	Probable (S)-N-methylcoclaurine 3'-hydroxylase isozyme 2 OS=Coptis japonica OX=3442 GN=CYP80B2 PE=2 SV=1	PF12257//PF00067	Vacuolar membrane-associated protein Iml1//Cytochrome P450	GO:0055114	oxidation-reduction process	GO:0016705//GO:0020037//GO:0005096//GO:0005506	oxidoreductase activity, acting on paired donors, with incorporation or reduction of molecular oxygen//heme binding//GTPase activator activity//iron ion binding	--	--	--	--	DOWN	-2.90827	6.12e-05	DOWN	-1.80266	0.0010183	DOWN	-4.81779	6.5e-14	DOWN	-8.89284	2.04e-08	DOWN	-10.4722	4.04e-18
Cluster-11149.4337	0.34	0.23	0.12	16.1	26.96	1752	1020267155	AMZ03377.1	2188	2.5e-243	cytochrome P450 CYP716A69 [Plectranthus barbatus]	XM_011079880.2	XM_011079880	751	0	PREDICTED: Sesamum indicum beta-amyrin 28-oxidase (LOC105161986), mRNA	K20667	CYP716A	beta-amyrin 28-monooxygenase	http://www.genome.jp/dbget-bin/www_bget?ko:K20667	I7C6E8	2022	1.7e-225	Beta-amyrin 28-monooxygenase OS=Panax ginseng OX=4054 GN=CYP716A52v2 PE=1 SV=1	PF04145//PF02522//PF00067	Ctr copper transporter family//Aminoglycoside 3-N-acetyltransferase//Cytochrome P450	GO:0046677//GO:0055114//GO:0006825//GO:0035434//GO:0042967	response to antibiotic//oxidation-reduction process//copper ion transport//copper ion transmembrane transport//obsolete acyl-carrier-protein biosynthetic process	GO:0016705//GO:0046353//GO:0020037//GO:0005506//GO:0005375	oxidoreductase activity, acting on paired donors, with incorporation or reduction of molecular oxygen//aminoglycoside 3-N-acetyltransferase activity//heme binding//iron ion binding//copper ion transmembrane transporter activity	GO:0016021	integral component of membrane	--	--	DOWN	-5.87848	9.44e-21	FALSE	-1.14054	0.036604	DOWN	-7.12573	1.08e-28	DOWN	-4.8954	3.25e-16	DOWN	-6.08356	4.43e-24
Cluster-11149.1607	0.06	0.2	0.1	0.13	2.26	1600	1600622029	TEY12180.1	953	3.6e-100	steroid 22-alpha-hydroxylase [Salvia splendens]	XM_011099796.2	XM_011099796	363	0	PREDICTED: Sesamum indicum cytochrome P450 724B1 (LOC105176862), mRNA	K12639	CYP724B1, D11	cytochrome P450 family 724 subfamily B polypeptide 1	http://www.genome.jp/dbget-bin/www_bget?ko:K12639	Q6F4F5	697	6.6e-72	Cytochrome P450 724B1 OS=Oryza sativa subsp. japonica OX=39947 GN=CYP724B1 PE=1 SV=1	PF00067//PF15200	Cytochrome P450//Keratinocyte differentiation-associated	GO:0055114	oxidation-reduction process	GO:0016705//GO:0020037//GO:0005506	oxidoreductase activity, acting on paired donors, with incorporation or reduction of molecular oxygen//heme binding//iron ion binding	GO:0005576	extracellular region	--	--	FALSE	0.827556	0.918612	DOWN	-4.52579	7.72e-09	DOWN	-3.8061	1.13e-07	FALSE	-0.30747	1	DOWN	-4.86639	1.25e-08
Cluster-11149.46468	0.27	0.17	0.1	1.82	38.59	1571	1276234230	PIM98211.1	1088	7.9e-116	Cytochrome P450 CYP2 subfamily [Handroanthus impetiginosus]	XM_011085602.2	XM_011085602	224	5.51e-111	PREDICTED: Sesamum indicum probable (S)-N-methylcoclaurine 3'-hydroxylase isozyme 2 (LOC105166294), mRNA	-	-	-	http://www.genome.jp/dbget-bin/www_bget?ko:-	Q9FXW4	376	1.1e-34	Probable (S)-N-methylcoclaurine 3'-hydroxylase isozyme 2 OS=Coptis japonica OX=3442 GN=CYP80B2 PE=2 SV=1	PF05151//PF00067	Photosystem II reaction centre M protein (PsbM)//Cytochrome P450	GO:0015979//GO:0019684//GO:0055114	photosynthesis//photosynthesis, light reaction//oxidation-reduction process	GO:0005506//GO:0020037//GO:0016705	iron ion binding//heme binding//oxidoreductase activity, acting on paired donors, with incorporation or reduction of molecular oxygen	GO:0009523//GO:0016021	photosystem II//integral component of membrane	--	--	DOWN	-3.21607	9.79e-05	DOWN	-4.80024	6.59e-19	DOWN	-8.12076	5.52e-33	FALSE	-2.06867	0.0127883	DOWN	-6.91529	3.73e-28
Cluster-9928.0	1.53	0.09	0.09	0	0	727	1276234296	PIM98244.1	603	6.3e-60	Cytochrome P450 CYP2 subfamily [Handroanthus impetiginosus]	XM_011101019.2	XM_011101019	274	3.98e-139	PREDICTED: Sesamum indicum cytochrome P450 81D1-like (LOC105177771), mRNA	-	-	-	http://www.genome.jp/dbget-bin/www_bget?ko:-	W8JMU7	389	1.6e-36	Cytochrome P450 81Q32 OS=Catharanthus roseus OX=4058 GN=CYP81Q32 PE=2 SV=1	PF00067	Cytochrome P450	GO:0055114	oxidation-reduction process	GO:0016705//GO:0020037//GO:0005506	oxidoreductase activity, acting on paired donors, with incorporation or reduction of molecular oxygen//heme binding//iron ion binding	--	--	--	--	FALSE	3.29321	1	FALSE	0	1	FALSE	3.0555	1	UP	7.47485	0.000331033	UP	7.20323	0.000455599
Cluster-11149.1999	0	0	0.09	0.26	2.02	742	1276237632	PIN00140.1	859	1.3e-89	Cytochrome P450 CYP2 subfamily [Handroanthus impetiginosus]	XM_011089064.2	XM_011089064	348	2.97e-180	PREDICTED: Sesamum indicum cytochrome P450 78A5 (LOC105168878), mRNA	-	-	-	http://www.genome.jp/dbget-bin/www_bget?ko:-	Q9LMX7	695	5.2e-72	Cytochrome P450 78A5 OS=Arabidopsis thaliana OX=3702 GN=CYP78A5 PE=2 SV=1	PF00067	Cytochrome P450	GO:0055114	oxidation-reduction process	GO:0005506//GO:0020037//GO:0016705	iron ion binding//heme binding//oxidoreductase activity, acting on paired donors, with incorporation or reduction of molecular oxygen	--	--	--	--	FALSE	-4.52318	0.566119	DOWN	-3.30263	0.00111748	DOWN	-7.67279	2.56e-05	FALSE	-4.35711	0.806498	DOWN	-7.43324	8.96e-05
Cluster-11149.1595	0	0.06	0.09	1.52	3.54	1722	747071857	XP_011082820.1	2042	2.1e-226	cytochrome P450 CYP72A219-like [Sesamum indicum]	XM_011084518.2	XM_011084518	611	0	PREDICTED: Sesamum indicum cytochrome P450 CYP72A219-like (LOC105165491), mRNA	-	-	-	http://www.genome.jp/dbget-bin/www_bget?ko:-	H2DH21	1565	1.6e-172	Cytochrome P450 CYP72A219 OS=Panax ginseng OX=4054 PE=2 SV=1	PF00067	Cytochrome P450	GO:0055114	oxidation-reduction process	GO:0016705//GO:0020037//GO:0005506	oxidoreductase activity, acting on paired donors, with incorporation or reduction of molecular oxygen//heme binding//iron ion binding	--	--	--	--	DOWN	-4.38802	7.23e-06	FALSE	-1.61297	0.00631043	DOWN	-6.09633	1.77e-14	DOWN	-8.43208	1.32e-06	DOWN	-9.82177	2.17e-14
Cluster-11149.45815	0.15	0.16	0.08	3.93	4.19	1369	1315689984	BBB06442.1	1672	1.3e-183	hypothetical protein [Sesamum indicum]	XM_020698675.1	XM_020698675	346	7.25e-179	PREDICTED: Sesamum indicum flavonoid 3'-monooxygenase-like (LOC105156323), mRNA	-	-	-	http://www.genome.jp/dbget-bin/www_bget?ko:-	A0A1D6F9Y9	883	1.5e-93	Trimethyltridecatetraene synthase OS=Zea mays OX=4577 GN=CYP92C6 PE=1 SV=1	PF00067	Cytochrome P450	GO:0055114	oxidation-reduction process	GO:0016705//GO:0005506//GO:0020037	oxidoreductase activity, acting on paired donors, with incorporation or reduction of molecular oxygen//iron ion binding//heme binding	--	--	--	--	DOWN	-4.39802	8.78e-09	FALSE	-0.491819	0.596437	DOWN	-4.99271	6.24e-12	DOWN	-3.98904	1.99e-07	DOWN	-4.52403	1.75e-09
Cluster-11149.11664	0.16	0.3	0.08	0.48	4.68	1290	848872921	XP_012837020.1	487	3.2e-46	PREDICTED: cytochrome P450 87A3-like [Erythranthe guttata]	--	--	--	--	--	-	-	-	http://www.genome.jp/dbget-bin/www_bget?ko:-	Q7XU38	292	4.9e-25	Cytochrome P450 87A3 OS=Oryza sativa subsp. japonica OX=39947 GN=CYP87A3 PE=2 SV=3	PF00067	Cytochrome P450	GO:0055114	oxidation-reduction process	GO:0016705//GO:0020037//GO:0005506	oxidoreductase activity, acting on paired donors, with incorporation or reduction of molecular oxygen//heme binding//iron ion binding	--	--	--	--	FALSE	-0.496041	1	DOWN	-3.65496	5.37e-09	DOWN	-4.25801	2.46e-10	FALSE	-0.879087	0.715601	DOWN	-4.57609	9.38e-10
Cluster-11149.46258	0.05	0.22	0.08	4.26	28.95	1824	604320861	EYU31635.1	1976	9.8e-219	hypothetical protein MIMGU_mgv1a025572mg [Erythranthe guttata]	XM_012988873.1	XM_012988873	547	0	PREDICTED: Erythranthe guttatus cytochrome P450 CYP72A219-like (LOC105964345), mRNA	-	-	-	http://www.genome.jp/dbget-bin/www_bget?ko:-	H2DH21	1661	1.3e-183	Cytochrome P450 CYP72A219 OS=Panax ginseng OX=4054 PE=2 SV=1	PF00067	Cytochrome P450	GO:0055114	oxidation-reduction process	GO:0016705//GO:0020037//GO:0005506	oxidoreductase activity, acting on paired donors, with incorporation or reduction of molecular oxygen//heme binding//iron ion binding	--	--	--	--	DOWN	-4.02987	7.73e-10	DOWN	-3.15911	2.07e-10	DOWN	-7.29573	7.46e-30	DOWN	-5.56728	2.19e-11	DOWN	-8.76261	5.88e-31
Cluster-11149.42846	2.89	0.27	0.05	9.93	21.87	1060	1173765647	XP_020551955.1	724	8.6e-74	geraniol 8-hydroxylase-like [Sesamum indicum]	--	--	--	--	--	-	-	-	http://www.genome.jp/dbget-bin/www_bget?ko:-	O64637	504	1.1e-49	Cytochrome P450 76C2 OS=Arabidopsis thaliana OX=3702 GN=CYP76C2 PE=2 SV=1	PF00067	Cytochrome P450	GO:0055114	oxidation-reduction process	GO:0005506//GO:0020037//GO:0016705	iron ion binding//heme binding//oxidoreductase activity, acting on paired donors, with incorporation or reduction of molecular oxygen	--	--	--	--	DOWN	-4.95264	1.25e-12	DOWN	-1.53707	0.00357867	DOWN	-6.59406	1.19e-22	FALSE	-1.10786	0.0902659	DOWN	-2.69443	1.75e-07
Cluster-11149.44740	0.03	0.05	0.04	22.14	138.55	2677	1276251238	PIN09965.1	1191	1.5e-127	Cytochrome P450 CYP2 subfamily [Handroanthus impetiginosus]	XM_011101440.2	XM_011101440	367	0	PREDICTED: Sesamum indicum cytochrome P450 CYP82D47-like (LOC105178082), mRNA	-	-	-	http://www.genome.jp/dbget-bin/www_bget?ko:-	O49859	711	2.6e-73	Cytochrome P450 82A4 OS=Glycine max OX=3847 GN=CYP82A4 PE=2 SV=1	PF00067//PF04083	Cytochrome P450//Partial alpha/beta-hydrolase lipase region	GO:0006629//GO:0055114	lipid metabolic process//oxidation-reduction process	GO:0005506//GO:0020037//GO:0016705	iron ion binding//heme binding//oxidoreductase activity, acting on paired donors, with incorporation or reduction of molecular oxygen	--	--	--	--	DOWN	-8.41394	1.19e-31	DOWN	-3.04155	2.75e-10	DOWN	-11.5556	6.04e-54	DOWN	-8.56946	3.24e-30	DOWN	-11.6473	1.74e-51
Cluster-16768.0	0.03	0.06	0.03	0.55	5.01	1701	848853566	XP_012844212.1	1854	1.3e-204	PREDICTED: cytochrome P450 94B3-like [Erythranthe guttata]	XM_012988758.1	XM_012988758	577	0	PREDICTED: Erythranthe guttatus cytochrome P450 94B3-like (LOC105964231), mRNA	K20665	CYP94B	jasmonoyl-isoleucine 12-hydroxylase	http://www.genome.jp/dbget-bin/www_bget?ko:K20665	Q9SMP5	1361	7.2e-149	Cytochrome P450 94B3 OS=Arabidopsis thaliana OX=3702 GN=CYP94B3 PE=1 SV=1	PF01080//PF00067	Presenilin//Cytochrome P450	GO:0055114//GO:0016485	oxidation-reduction process//protein processing	GO:0005506//GO:0020037//GO:0016705//GO:0004190	iron ion binding//heme binding//oxidoreductase activity, acting on paired donors, with incorporation or reduction of molecular oxygen//aspartic-type endopeptidase activity	GO:0016021	integral component of membrane	--	--	FALSE	-2.91464	0.0167668	DOWN	-3.56767	1.76e-09	DOWN	-6.57797	2.83e-17	FALSE	-3.4479	0.0296061	DOWN	-7.03886	7.2e-16
Cluster-11149.4172	0	0.06	0.03	15.95	17.07	1813	1276262257	PIN18983.1	1800	2.5e-198	Cytochrome P450 CYP2 subfamily [Handroanthus impetiginosus]	--	--	--	--	--	-	-	-	http://www.genome.jp/dbget-bin/www_bget?ko:-	A0A068Q6L2	1217	3.8e-132	Cytochrome P450 736A117 OS=Prunus mume OX=102107 GN=CYP736A117 PE=2 SV=1	PF00067	Cytochrome P450	GO:0055114	oxidation-reduction process	GO:0016705//GO:0005506//GO:0020037	oxidoreductase activity, acting on paired donors, with incorporation or reduction of molecular oxygen//iron ion binding//heme binding	--	--	--	--	DOWN	-7.86374	7.46e-25	FALSE	-0.493657	0.526677	DOWN	-8.45251	2.55e-29	DOWN	-11.9074	1.85e-25	DOWN	-12.1777	5.85e-29
Cluster-11149.45030	0.28	0.13	0.03	15.71	34.6	1920	1173798717	XP_011081376.2	2054	9.3e-228	geraniol 8-hydroxylase-like [Sesamum indicum]	--	--	--	--	--	-	-	-	http://www.genome.jp/dbget-bin/www_bget?ko:-	A0A068Q5V6	838	3.6e-88	Cytochrome P450 71AU50 OS=Prunus mume OX=102107 GN=CYP71AU50 PE=2 SV=1	PF00067	Cytochrome P450	GO:0055114	oxidation-reduction process	GO:0020037//GO:0005506//GO:0016705	heme binding//iron ion binding//oxidoreductase activity, acting on paired donors, with incorporation or reduction of molecular oxygen	--	--	--	--	DOWN	-6.66268	3.33e-23	DOWN	-1.53554	0.00259281	DOWN	-8.30251	2.98e-34	DOWN	-5.1297	2.73e-17	DOWN	-6.71265	5.69e-28
Cluster-15855.0	0.19	0.39	0.02	0.64	1.15	2298	848892604	XP_012846371.1	1922	2.3e-212	PREDICTED: cytochrome P450 87A3 [Erythranthe guttata]	XM_011082723.2	XM_011082723	903	0	PREDICTED: Sesamum indicum cytochrome P450 87A3-like (LOC105164141), mRNA	-	-	-	http://www.genome.jp/dbget-bin/www_bget?ko:-	Q7XU38	1432	5.7e-157	Cytochrome P450 87A3 OS=Oryza sativa subsp. japonica OX=39947 GN=CYP87A3 PE=2 SV=3	PF00558//PF00067	Vpu protein//Cytochrome P450	GO:0055114//GO:0019076//GO:0006812//GO:0032801	oxidation-reduction process//viral release from host cell//cation transport//receptor catabolic process	GO:0016705//GO:0020037//GO:0005261//GO:0005506	oxidoreductase activity, acting on paired donors, with incorporation or reduction of molecular oxygen//heme binding//cation channel activity//iron ion binding	GO:0033644	host cell membrane	--	--	FALSE	-0.517619	0.835728	FALSE	-1.24796	0.0814274	DOWN	-1.87501	0.00450878	FALSE	-1.09681	0.362672	DOWN	-2.39181	0.00101859
Cluster-11149.4448	0.02	0.07	0.02	30.91	22.29	2141	1276265808	PIN22009.1	1573	6.2e-172	Cytochrome P450 CYP4/CYP19/CYP26 subfamily [Handroanthus impetiginosus]	KF766123.1	KF766123	377	0	Avicennia officinalis putative cytochrome P450 (CYP86B1) mRNA, partial cds	-	-	-	http://www.genome.jp/dbget-bin/www_bget?ko:-	Q9FMY1	1327	7.9e-145	Cytochrome P450 86B1 OS=Arabidopsis thaliana OX=3702 GN=CYP86B1 PE=2 SV=1	PF00067	Cytochrome P450	GO:0055114	oxidation-reduction process	GO:0016705//GO:0005506//GO:0020037	oxidoreductase activity, acting on paired donors, with incorporation or reduction of molecular oxygen//iron ion binding//heme binding	--	--	--	--	DOWN	-8.53436	1.7e-32	FALSE	0.0754174	1	DOWN	-8.55907	8.4e-33	DOWN	-9.6252	7.1e-32	DOWN	-9.57368	4.3e-31
Cluster-11149.670	1.9	1.77	0	0.61	0	316	747102319	XP_011099321.1	448	2.6e-42	cytochrome P450 81D1-like [Sesamum indicum]	XM_011101018.2	XM_011101018	115	3.96e-51	PREDICTED: Sesamum indicum cytochrome P450 81D1-like (LOC105177770), mRNA	-	-	-	http://www.genome.jp/dbget-bin/www_bget?ko:-	Q9SZU1	353	1e-32	Cytochrome P450 81F4 OS=Arabidopsis thaliana OX=3702 GN=CYP81F4 PE=1 SV=1	PF00067	Cytochrome P450	GO:0055114	oxidation-reduction process	GO:0016705//GO:0020037//GO:0005506	oxidoreductase activity, acting on paired donors, with incorporation or reduction of molecular oxygen//heme binding//iron ion binding	--	--	--	--	FALSE	1.71802	0.959805	FALSE	2.9964	1	FALSE	4.51988	0.441562	FALSE	2.10323	0.745764	FALSE	4.7457	0.44892
Cluster-11149.39793	0	1.68	0	2.97	0	348	848900752	XP_012850548.1	248	4.4e-19	PREDICTED: cytochrome P450 CYP72A219-like [Erythranthe guttata]	XM_012995095.1	XM_012995095	91	9.68e-38	PREDICTED: Erythranthe guttatus cytochrome P450 CYP72A219-like (LOC105970285), mRNA	-	-	-	http://www.genome.jp/dbget-bin/www_bget?ko:-	Q2MJ19	170	1.8e-11	Cytochrome P450 72A68 OS=Medicago truncatula OX=3880 GN=CYP72A68 PE=1 SV=1	PF00067	Cytochrome P450	GO:0055114	oxidation-reduction process	GO:0016705//GO:0020037//GO:0005506	oxidoreductase activity, acting on paired donors, with incorporation or reduction of molecular oxygen//heme binding//iron ion binding	--	--	--	--	FALSE	-0.530886	1	FALSE	5.63983	0.144338	FALSE	4.91911	0.273386	FALSE	-5.5387	0.148189	FALSE	0	1
Cluster-5620.0	0	0	0	1.94	0	447	747102370	XP_011099348.1	479	9.2e-46	cytochrome P450 81E8-like [Sesamum indicum]	--	--	--	--	--	-	-	-	http://www.genome.jp/dbget-bin/www_bget?ko:-	W8JMU7	365	5.8e-34	Cytochrome P450 81Q32 OS=Catharanthus roseus OX=4058 GN=CYP81Q32 PE=2 SV=1	PF00067	Cytochrome P450	GO:0055114	oxidation-reduction process	GO:0016705//GO:0020037//GO:0005506	oxidoreductase activity, acting on paired donors, with incorporation or reduction of molecular oxygen//heme binding//iron ion binding	--	--	--	--	FALSE	-6.0657	0.0663758	FALSE	5.99595	0.0575446	FALSE	0	1	FALSE	-5.89436	0.093697	FALSE	0	1
Cluster-11149.7454	0.69	1.27	0	1.97	0	310	604320862	EYU31636.1	397	2.1e-36	hypothetical protein MIMGU_mgv1a004595mg [Erythranthe guttata]	--	--	--	--	--	-	-	-	http://www.genome.jp/dbget-bin/www_bget?ko:-	H2DH21	320	6.6e-29	Cytochrome P450 CYP72A219 OS=Panax ginseng OX=4054 PE=2 SV=1	PF00067	Cytochrome P450	GO:0055114	oxidation-reduction process	GO:0005506//GO:0020037//GO:0016705	iron ion binding//heme binding//oxidoreductase activity, acting on paired donors, with incorporation or reduction of molecular oxygen	--	--	--	--	FALSE	-0.305499	1	FALSE	4.45551	0.540202	FALSE	3.96602	0.705108	FALSE	-0.845465	1	FALSE	3.26447	1
Cluster-11149.17743	0.38	0.36	0	2.19	0	365	--	--	--	--	--	XM_012988874.1	XM_012988874	48	8.18e-14	PREDICTED: Erythranthe guttatus cytochrome P450 CYP72A219-like (LOC105964346), mRNA	--	--	--	--	--	--	--	--	--	--	--	--	--	--	--	--	--	--	FALSE	-2.19825	0.394512	FALSE	5.42225	0.233202	FALSE	3.0555	1	FALSE	-1.80983	0.54395	FALSE	3.26447	1
Cluster-7835.0	0.27	0	0	0	0.94	572	1600682875	TEY64879.1	679	7.6e-69	steroid 22-alpha-hydroxylase [Salvia splendens]	XM_011099796.2	XM_011099796	231	2.47e-115	PREDICTED: Sesamum indicum cytochrome P450 724B1 (LOC105176862), mRNA	K12639	CYP724B1, D11	cytochrome P450 family 724 subfamily B polypeptide 1	http://www.genome.jp/dbget-bin/www_bget?ko:K12639	Q6F4F5	554	9.1e-56	Cytochrome P450 724B1 OS=Oryza sativa subsp. japonica OX=39947 GN=CYP724B1 PE=1 SV=1	PF00067	Cytochrome P450	GO:0055114	oxidation-reduction process	GO:0016705//GO:0020037//GO:0005506	oxidoreductase activity, acting on paired donors, with incorporation or reduction of molecular oxygen//heme binding//iron ion binding	--	--	--	--	FALSE	-5.13e-15	1	FALSE	-6.05708	0.0575446	FALSE	-5.97265	0.0376684	FALSE	4.44697	0.806498	FALSE	-1.54861	0.400135
Cluster-6345.0	0	0	0	0.32	4.93	380	747051778	XP_011071981.1	431	2.9e-40	cytochrome P450 71A8-like [Sesamum indicum]	--	--	--	--	--	K07418	CYP2J	cytochrome P450 family 2 subfamily J	http://www.genome.jp/dbget-bin/www_bget?ko:K07418	A0A068Q6L2	331	4.3e-30	Cytochrome P450 736A117 OS=Prunus mume OX=102107 GN=CYP736A117 PE=2 SV=1	PF00067	Cytochrome P450	GO:0055114	oxidation-reduction process	GO:0020037//GO:0005506//GO:0016705	heme binding//iron ion binding//oxidoreductase activity, acting on paired donors, with incorporation or reduction of molecular oxygen	--	--	--	--	FALSE	-3.05854	1	FALSE	-4.14861	0.00643667	DOWN	-7.05988	0.00098774	FALSE	-2.90649	1	DOWN	-6.82102	0.00255923
Cluster-5444.0	0	0	0	0	1.41	306	848915639	XP_012855531.1	354	2e-31	PREDICTED: cytochrome P450 71A8-like [Erythranthe guttata]	--	--	--	--	--	K07418	CYP2J	cytochrome P450 family 2 subfamily J	http://www.genome.jp/dbget-bin/www_bget?ko:K07418	Q42716	287	4.4e-25	Cytochrome P450 71A8 OS=Mentha piperita OX=34256 GN=CYP71A8 PE=3 SV=1	PF02845//PF00067	CUE domain//Cytochrome P450	GO:0055114	oxidation-reduction process	GO:0005506//GO:0020037//GO:0016705//GO:0005515	iron ion binding//heme binding//oxidoreductase activity, acting on paired donors, with incorporation or reduction of molecular oxygen//protein binding	--	--	--	--	FALSE	-5.13e-15	1	FALSE	-4.3029	0.796404	FALSE	-4.22162	0.705108	FALSE	0	1	FALSE	-3.99477	0.718417
Cluster-11149.47476	0.07	0	0	0.14	1.24	875	1279056051	XP_022889899.1	737	2.2e-75	cytochrome P450 71A8-like [Olea europaea var. sylvestris]	--	--	--	--	--	K07418	CYP2J	cytochrome P450 family 2 subfamily J	http://www.genome.jp/dbget-bin/www_bget?ko:K07418	Q42716	670	4.9e-69	Cytochrome P450 71A8 OS=Mentha piperita OX=34256 GN=CYP71A8 PE=3 SV=1	PF00067	Cytochrome P450	GO:0055114	oxidation-reduction process	GO:0020037//GO:0005506//GO:0016705	heme binding//iron ion binding//oxidoreductase activity, acting on paired donors, with incorporation or reduction of molecular oxygen	--	--	--	--	FALSE	-4.05447	0.835728	FALSE	-3.41834	0.0077735	DOWN	-7.32111	0.000277514	FALSE	-0.379827	1	DOWN	-3.81745	0.00409169
Cluster-4429.0	0	0	0	0.54	3.03	406	474405967	EMS66485.1	193	1.2e-12	Secologanin synthase [Triticum urartu]	--	--	--	--	--	K20660	CYP709	cytochrome P450 family 709	http://www.genome.jp/dbget-bin/www_bget?ko:K20660	Q2QYH7	171	1.7e-11	Cytochrome P450 714C2 OS=Oryza sativa subsp. japonica OX=39947 GN=CYP714C2 PE=2 SV=1	PF00067	Cytochrome P450	GO:0055114	oxidation-reduction process	GO:0020037//GO:0005506//GO:0016705	heme binding//iron ion binding//oxidoreductase activity, acting on paired donors, with incorporation or reduction of molecular oxygen	--	--	--	--	FALSE	-3.96925	0.835728	FALSE	-2.7982	0.0413052	FALSE	-6.61635	0.00586292	FALSE	-3.80692	0.806498	FALSE	-6.37819	0.0158209
Cluster-1092.0	0	0	0	0	1.45	1081	1344053759	XP_023910195.1	390	4.7e-35	benzoate 4-monooxygenase-like [Quercus suber]	--	--	--	--	--	K20617	CYP71A	cytochrome P450 family 71 subfamily A	http://www.genome.jp/dbget-bin/www_bget?ko:K20617	Q5AUZ9	602	4.7e-61	Cytochrome P450 monooxygenase atnE OS=Emericella nidulans (strain FGSC A4 / ATCC 38163 / CBS 112.46 / NRRL 194 / M139) OX=227321 GN=atnE PE=2 SV=1	PF00067	Cytochrome P450	GO:0055114	oxidation-reduction process	GO:0005506//GO:0020037//GO:0016705	iron ion binding//heme binding//oxidoreductase activity, acting on paired donors, with incorporation or reduction of molecular oxygen	--	--	--	--	FALSE	-5.13e-15	1	DOWN	-8.04074	3.93e-06	DOWN	-7.95532	4.15e-06	FALSE	0	1	DOWN	-7.71555	1.95e-05
Cluster-6758.0	0	0.1	0	0.29	3.08	685	848917004	XP_012855988.1	814	2e-84	PREDICTED: LOW QUALITY PROTEIN: cytochrome P450 71D10-like [Erythranthe guttata]	XM_021970916.1	XM_021970916	145	1.92e-67	PREDICTED: Prunus avium cytochrome P450 71D11-like (LOC110767394), mRNA	-	-	-	http://www.genome.jp/dbget-bin/www_bget?ko:-	P93530	641	8.9e-66	Cytochrome P450 71D6 OS=Solanum chacoense OX=4108 GN=CYP71D6 PE=2 SV=1	PF00067	Cytochrome P450	GO:0055114	oxidation-reduction process	GO:0016705//GO:0005506//GO:0020037	oxidoreductase activity, acting on paired donors, with incorporation or reduction of molecular oxygen//iron ion binding//heme binding	--	--	--	--	FALSE	-1.22997	0.959805	DOWN	-3.73154	7.04e-05	DOWN	-5.04609	1e-05	FALSE	-4.35711	0.806498	DOWN	-7.86172	6.53e-06
Cluster-11149.47138	0	0.03	0	0.37	3	1713	1276254430	PIN12475.1	1834	2.7e-202	Cytochrome P450 CYP4/CYP19/CYP26 subfamily [Handroanthus impetiginosus]	XM_011076216.2	XM_011076216	468	0	PREDICTED: Sesamum indicum cytochrome P450 734A1 (LOC105159228), mRNA	-	-	-	http://www.genome.jp/dbget-bin/www_bget?ko:-	O48786	1054	2.9e-113	Cytochrome P450 734A1 OS=Arabidopsis thaliana OX=3702 GN=CYP734A1 PE=2 SV=1	PF00067	Cytochrome P450	GO:0055114	oxidation-reduction process	GO:0005506//GO:0020037//GO:0016705	iron ion binding//heme binding//oxidoreductase activity, acting on paired donors, with incorporation or reduction of molecular oxygen	--	--	--	--	FALSE	-3.29636	0.0471486	DOWN	-3.38233	6.72e-08	DOWN	-6.76066	2.53e-14	FALSE	-6.41739	0.0151633	DOWN	-9.57563	3.8e-13
Cluster-11149.42341	0.29	0	0	0.29	0.8	840	747049860	XP_011070985.1	1140	3.9e-122	cytochrome P450 704B1 [Sesamum indicum]	XM_011072683.2	XM_011072683	366	0	PREDICTED: Sesamum indicum cytochrome P450 704B1 (LOC105156526), mRNA	K20495	CYP704B1	long-chain fatty acid omega-monooxygenase	http://www.genome.jp/dbget-bin/www_bget?ko:K20495	Q9C788	1017	2.7e-109	Cytochrome P450 704B1 OS=Arabidopsis thaliana OX=3702 GN=CYP704B1 PE=1 SV=1	PF00067	Cytochrome P450	GO:0055114	oxidation-reduction process	GO:0020037//GO:0005506//GO:0016705	heme binding//iron ion binding//oxidoreductase activity, acting on paired donors, with incorporation or reduction of molecular oxygen	--	--	--	--	FALSE	-4.92245	0.380656	FALSE	-1.84724	0.205599	FALSE	-6.61635	0.00586292	FALSE	0.659072	1	FALSE	-1.23096	0.429708
Cluster-15153.0	0.29	1.3	0	0	0.89	689	1276256033	PIN13797.1	617	1.4e-61	Cytochrome P450 CYP2 subfamily [Handroanthus impetiginosus]	XM_012989737.1	XM_012989737	94	4.33e-39	PREDICTED: Erythranthe guttatus cytochrome P450 CYP736A12-like (LOC105965208), mRNA	K20562	CYP736A	biphenyl-4-hydroxylase	http://www.genome.jp/dbget-bin/www_bget?ko:K20562	A0A068Q5V6	444	6.2e-43	Cytochrome P450 71AU50 OS=Prunus mume OX=102107 GN=CYP71AU50 PE=2 SV=1	PF00067	Cytochrome P450	GO:0055114	oxidation-reduction process	GO:0005506//GO:0020037//GO:0016705	iron ion binding//heme binding//oxidoreductase activity, acting on paired donors, with incorporation or reduction of molecular oxygen	--	--	--	--	UP	6.85097	0.00452079	FALSE	-6.41483	0.0234343	FALSE	0.256043	1	FALSE	5.00971	0.362672	FALSE	-1.34683	0.461357
Cluster-11149.47355	0.17	0.91	0	1.21	2.18	1021	747072132	XP_011082966.1	700	5e-71	cytochrome P450 CYP72A219 [Sesamum indicum]	XM_011084664.2	XM_011084664	228	2.11e-113	PREDICTED: Sesamum indicum cytochrome P450 CYP72A219 (LOC105165602), mRNA	-	-	-	http://www.genome.jp/dbget-bin/www_bget?ko:-	W8JWW3	559	4.3e-56	Cytochrome P450 72A225 OS=Catharanthus roseus OX=4058 GN=CYP72A225 PE=2 SV=1	PF04777//PF00067	Erv1 / Alr family//Cytochrome P450	GO:0055114	oxidation-reduction process	GO:0016705//GO:0016972//GO:0005506//GO:0020037	oxidoreductase activity, acting on paired donors, with incorporation or reduction of molecular oxygen//thiol oxidase activity//iron ion binding//heme binding	--	--	--	--	FALSE	-0.194232	1	FALSE	-1.2452	0.13038	FALSE	-1.54883	0.0276616	FALSE	-2.15975	0.0761314	DOWN	-3.44595	8.96e-05
Cluster-11149.1466	0.32	0	0	0.92	1.87	387	1276234947	PIM98576.1	522	8.2e-51	Cytochrome P450 CYP4/CYP19/CYP26 subfamily [Handroanthus impetiginosus]	XM_011084666.2	XM_011084666	138	8.12e-64	PREDICTED: Sesamum indicum cytochrome P450 CYP72A219-like (LOC105165603), mRNA	-	-	-	http://www.genome.jp/dbget-bin/www_bget?ko:-	W8JWW3	367	2.9e-34	Cytochrome P450 72A225 OS=Catharanthus roseus OX=4058 GN=CYP72A225 PE=2 SV=1	PF00067	Cytochrome P450	GO:0055114	oxidation-reduction process	GO:0016705//GO:0005506//GO:0020037	oxidoreductase activity, acting on paired donors, with incorporation or reduction of molecular oxygen//iron ion binding//heme binding	--	--	--	--	FALSE	-4.52318	0.566119	FALSE	-1.38279	0.485866	FALSE	-5.75408	0.101513	FALSE	-0.845465	1	FALSE	-2.25363	0.293937
Cluster-16088.0	0.49	0.49	0	0.48	0.49	425	747068532	XP_011081025.1	673	2.8e-68	cytochrome P450 87A3-like [Sesamum indicum]	XM_011082723.2	XM_011082723	262	1.05e-132	PREDICTED: Sesamum indicum cytochrome P450 87A3-like (LOC105164141), mRNA	-	-	-	http://www.genome.jp/dbget-bin/www_bget?ko:-	Q7XU38	501	9.4e-50	Cytochrome P450 87A3 OS=Oryza sativa subsp. japonica OX=39947 GN=CYP87A3 PE=2 SV=3	PF00067	Cytochrome P450	GO:0055114	oxidation-reduction process	GO:0020037//GO:0005506//GO:0016705	heme binding//iron ion binding//oxidoreductase activity, acting on paired donors, with incorporation or reduction of molecular oxygen	--	--	--	--	FALSE	0.248429	1	FALSE	-0.399847	1	FALSE	-0.255597	1	FALSE	0.640047	1	FALSE	0.192611	1
Cluster-11149.4461	0	0.23	0	102.25	63.25	1978	747071054	XP_011082379.1	2555	7.7e-286	cytochrome P450 86A1 [Sesamum indicum]	XM_011084077.2	XM_011084077	862	0	PREDICTED: Sesamum indicum cytochrome P450 86A1 (LOC105165168), mRNA	K15401	CYP86A1	fatty acid omega-hydroxylase	http://www.genome.jp/dbget-bin/www_bget?ko:K15401	P48422	2100	1.7e-234	Cytochrome P450 86A1 OS=Arabidopsis thaliana OX=3702 GN=CYP86A1 PE=1 SV=2	PF00067	Cytochrome P450	GO:0055114	oxidation-reduction process	GO:0016705//GO:0020037//GO:0005506	oxidoreductase activity, acting on paired donors, with incorporation or reduction of molecular oxygen//heme binding//iron ion binding	--	--	--	--	DOWN	-8.58048	4.54e-40	FALSE	0.296522	0.792252	DOWN	-8.39109	4.27e-38	DOWN	-14.7324	4e-44	DOWN	-14.2126	3.63e-43
Cluster-2160.0	0	0	0	0	3.57	552	326515362	BAK03594.1	831	1.7e-86	predicted protein [Hordeum vulgare subsp. vulgare]	XM_003843149.1	XM_003843149	119	4.34e-53	Leptosphaeria maculans JN3 similar to cytochrome P450 alkane hydroxylase (LEMA_P073070.1), partial mRNA	-	-	-	http://www.genome.jp/dbget-bin/www_bget?ko:-	A0A2Z5TMB8	641	7.1e-66	Cytochrome P450 monooxygenase himC OS=Aspergillus japonicus OX=34381 GN=himC PE=3 SV=1	PF00067//PF02481	Cytochrome P450//DNA recombination-mediator protein A	GO:0055114//GO:0009294	oxidation-reduction process//DNA mediated transformation	GO:0016705//GO:0005506//GO:0020037	oxidoreductase activity, acting on paired donors, with incorporation or reduction of molecular oxygen//iron ion binding//heme binding	--	--	--	--	FALSE	-5.13e-15	1	DOWN	-7.87789	1.59e-05	DOWN	-7.79252	1.22e-05	FALSE	0	1	DOWN	-7.55287	4.11e-05
Cluster-6404.0	0	0	0	0.13	3.56	1195	604302644	EYU22201.1	1488	2.5e-162	hypothetical protein MIMGU_mgv1a018940mg [Erythranthe guttata]	XM_023034131.1	XM_023034131	243	1.14e-121	PREDICTED: Olea europaea var. sylvestris cytochrome P450 71A8-like (LOC111405306), mRNA	-	-	-	http://www.genome.jp/dbget-bin/www_bget?ko:-	Q42716	1116	1.3e-120	Cytochrome P450 71A8 OS=Mentha piperita OX=34256 GN=CYP71A8 PE=3 SV=1	PF00067	Cytochrome P450	GO:0055114	oxidation-reduction process	GO:0005506//GO:0020037//GO:0016705	iron ion binding//heme binding//oxidoreductase activity, acting on paired donors, with incorporation or reduction of molecular oxygen	--	--	--	--	FALSE	-4.52318	0.566119	DOWN	-5.05976	3.43e-10	DOWN	-9.42964	2.56e-12	FALSE	-4.35711	0.806498	DOWN	-9.18919	3.49e-11
Cluster-3046.1	0	0	0	0.07	2	1413	1344045419	XP_023902749.1	489	2e-46	cytochrome P450 52A13-like [Quercus suber]	--	--	--	--	--	-	-	-	http://www.genome.jp/dbget-bin/www_bget?ko:-	Q12573	558	7.7e-56	Cytochrome P450 52E2 OS=Candida apicola OX=29830 GN=CYP52E2 PE=3 SV=1	PF00253//PF00067	Ribosomal protein S14p/S29e//Cytochrome P450	GO:0042254//GO:0006412//GO:0055114	ribosome biogenesis//translation//oxidation-reduction process	GO:0005506//GO:0003735//GO:0016705//GO:0020037	iron ion binding//structural constituent of ribosome//oxidoreductase activity, acting on paired donors, with incorporation or reduction of molecular oxygen//heme binding	GO:0005840	ribosome	--	--	FALSE	-3.96925	0.835728	DOWN	-5.08257	1.37e-08	DOWN	-8.90005	7.87e-10	FALSE	-3.80692	0.806498	DOWN	-8.65977	7.01e-09
Cluster-11149.47125	0	0	0	0.32	5.35	1948	1343996814	XP_023880537.1	961	5.2e-101	cytochrome P450 monooxygenase psoD-like [Quercus suber]	--	--	--	--	--	-	-	-	http://www.genome.jp/dbget-bin/www_bget?ko:-	Q4WB01	464	8.5e-45	Cytochrome P450 monooxygenase psoD OS=Neosartorya fumigata (strain ATCC MYA-4609 / Af293 / CBS 101355 / FGSC A1100) OX=330879 GN=psoD PE=1 SV=2	PF09061//PF00839//PF00067	Stirrup//Cysteine rich repeat//Cytochrome P450	GO:0055114	oxidation-reduction process	GO:0016705//GO:0005506//GO:0020037//GO:0016788	oxidoreductase activity, acting on paired donors, with incorporation or reduction of molecular oxygen//iron ion binding//heme binding//hydrolase activity, acting on ester bonds	GO:0016020	membrane	KOG0156	Cytochrome P450 CYP2 subfamily	FALSE	-6.58957	0.0107999	DOWN	-4.43023	2.85e-13	DOWN	-10.864	1.76e-20	FALSE	-6.41739	0.0151633	DOWN	-10.6233	5.44e-19
Cluster-19740.0	0	0.17	0	0.16	1.83	509	747080243	XP_011087366.1	554	2.1e-54	cytochrome P450 78A5 [Sesamum indicum]	CP046696.1	CP046696	100	1.45e-42	Solanum tuberosum cultivar MSH/14-112 chromosome 3	-	-	-	http://www.genome.jp/dbget-bin/www_bget?ko:-	Q9LMX7	406	1.2e-38	Cytochrome P450 78A5 OS=Arabidopsis thaliana OX=3702 GN=CYP78A5 PE=2 SV=1	PF00067	Cytochrome P450	GO:0055114	oxidation-reduction process	GO:0020037//GO:0005506//GO:0016705	heme binding//iron ion binding//oxidoreductase activity, acting on paired donors, with incorporation or reduction of molecular oxygen	--	--	--	--	FALSE	0.234667	1	FALSE	-3.70485	0.0413052	FALSE	-3.56085	0.026651	FALSE	-2.90649	1	FALSE	-6.37819	0.0158209
Cluster-11149.45462	0.41	0	0	1.18	9.2	356	1276252856	PIN11215.1	227	1.2e-16	Cytochrome P450 CYP2 subfamily [Handroanthus impetiginosus]	--	--	--	--	--	-	-	-	http://www.genome.jp/dbget-bin/www_bget?ko:-	Q9LIP5	141	4.4e-08	Cytochrome P450 71B35 OS=Arabidopsis thaliana OX=3702 GN=CYP71B35 PE=2 SV=1	PF00067	Cytochrome P450	GO:0055114	oxidation-reduction process	GO:0005506//GO:0020037//GO:0016705	iron ion binding//heme binding//oxidoreductase activity, acting on paired donors, with incorporation or reduction of molecular oxygen	--	--	--	--	FALSE	-4.52318	0.566119	DOWN	-3.30263	0.00111748	DOWN	-7.67279	2.56e-05	FALSE	-0.845465	1	DOWN	-4.16877	0.000648441
Cluster-11149.48937	0	0	0	0	4.86	336	1344016039	XP_023890740.1	154	3.4e-08	cytochrome P450 monooxygenase fsdH-like [Quercus suber]	--	--	--	--	--	K20665	CYP94B	jasmonoyl-isoleucine 12-hydroxylase	http://www.genome.jp/dbget-bin/www_bget?ko:K20665	Q9Y758	173	8.1e-12	Cytochrome P450 52A13 OS=Debaryomyces hansenii OX=4959 GN=CYP52A13 PE=2 SV=1	PF00067	Cytochrome P450	GO:0055114	oxidation-reduction process	GO:0005506//GO:0020037//GO:0016705	iron ion binding//heme binding//oxidoreductase activity, acting on paired donors, with incorporation or reduction of molecular oxygen	--	--	--	--	FALSE	-5.13e-15	1	FALSE	-6.56514	0.0149166	FALSE	-6.48032	0.00923724	FALSE	0	1	FALSE	-6.24242	0.0245024
Cluster-11149.2518	0	0.17	0	0.37	12	1495	1276261446	PIN18284.1	249	1.5e-18	Cytochrome P450 CYP2 subfamily [Handroanthus impetiginosus]	--	--	--	--	--	-	-	-	http://www.genome.jp/dbget-bin/www_bget?ko:-	Q42799	161	8.8e-10	Cytochrome P450 93A2 OS=Glycine max OX=3847 GN=CYP93A2 PE=2 SV=1	PF00067	Cytochrome P450	GO:0055114	oxidation-reduction process	GO:0016705//GO:0005506//GO:0020037	oxidoreductase activity, acting on paired donors, with incorporation or reduction of molecular oxygen//iron ion binding//heme binding	--	--	--	--	FALSE	-0.910661	0.711943	DOWN	-5.38578	8.93e-18	DOWN	-6.4014	4.41e-21	FALSE	-6.17945	0.0382676	DOWN	-11.3407	1.89e-23
Cluster-11149.47676	0	0	0	0	1.53	418	357159734	XP_003578542.1	193	1.3e-12	cytochrome P450 709B2 isoform X1 [Brachypodium distachyon]	--	--	--	--	--	-	-	-	http://www.genome.jp/dbget-bin/www_bget?ko:-	A2A974	186	3.1e-13	Cytochrome P450 4A12B OS=Mus musculus OX=10090 GN=Cyp4a12b PE=1 SV=1	PF00067	Cytochrome P450	GO:0055114	oxidation-reduction process	GO:0005506//GO:0020037//GO:0016705	iron ion binding//heme binding//oxidoreductase activity, acting on paired donors, with incorporation or reduction of molecular oxygen	--	--	KOG0157	Cytochrome P450 CYP4/CYP19/CYP26 subfamilies	FALSE	-5.13e-15	1	FALSE	-5.83829	0.0907098	FALSE	-5.75408	0.101513	FALSE	0	1	FALSE	-5.5181	0.104156
Cluster-11149.3041	0.79	1.38	0	2.99	2.27	301	1276232594	PIM97508.1	306	7.2e-26	Cytochrome P450 CYP4/CYP19/CYP26 subfamily [Handroanthus impetiginosus]	--	--	--	--	--	-	-	-	http://www.genome.jp/dbget-bin/www_bget?ko:-	H2DH21	271	3.1e-23	Cytochrome P450 CYP72A219 OS=Panax ginseng OX=4054 PE=2 SV=1	PF00067	Cytochrome P450	GO:0055114	oxidation-reduction process	GO:0016705//GO:0020037//GO:0005506	oxidoreductase activity, acting on paired donors, with incorporation or reduction of molecular oxygen//heme binding//iron ion binding	--	--	--	--	FALSE	-0.760431	1	FALSE	-0.00927949	1	FALSE	-0.869603	1	FALSE	-1.2428	0.942231	FALSE	-1.28478	0.843384
Cluster-4780.0	0	0	0	0.25	1.7	757	508096136	AGN04220.1	812	3.8e-84	cytochrome P450 [Salvia miltiorrhiza]	--	--	--	--	--	-	-	-	http://www.genome.jp/dbget-bin/www_bget?ko:-	O81971	572	9.8e-58	Cytochrome P450 71D9 OS=Glycine max OX=3847 GN=CYP71D9 PE=2 SV=1	PF00067	Cytochrome P450	GO:0055114	oxidation-reduction process	GO:0005506//GO:0020037//GO:0016705	iron ion binding//heme binding//oxidoreductase activity, acting on paired donors, with incorporation or reduction of molecular oxygen	--	--	--	--	FALSE	-4.52318	0.566119	DOWN	-3.10199	0.00285694	DOWN	-7.47222	8.15e-05	FALSE	-4.35711	0.806498	DOWN	-7.23286	0.000301576
Cluster-11149.44947	0	0.15	0	3.12	30.46	848	1276261446	PIN18284.1	856	3.4e-89	Cytochrome P450 CYP2 subfamily [Handroanthus impetiginosus]	XM_011072929.1	XM_011072929	218	6.31e-108	PREDICTED: Sesamum indicum 7-ethoxycoumarin O-deethylase-like (LOC105156707), mRNA	-	-	-	http://www.genome.jp/dbget-bin/www_bget?ko:-	W8JMV1	601	4.8e-61	Cytochrome P450 76T24 OS=Catharanthus roseus OX=4058 GN=CYP76T24 PE=2 SV=1	PF00067	Cytochrome P450	GO:0055114	oxidation-reduction process	GO:0005506//GO:0020037//GO:0016705	iron ion binding//heme binding//oxidoreductase activity, acting on paired donors, with incorporation or reduction of molecular oxygen	--	--	--	--	DOWN	-4.12029	5.54e-05	DOWN	-3.68192	5.51e-12	DOWN	-7.89754	1.36e-25	DOWN	-8.16444	1.03e-05	DOWN	-11.6228	2.78e-25
Cluster-4801.0	0	0	0	0.18	1.27	487	747041075	XP_011070727.1	331	1.5e-28	cytochrome P450 76C2-like [Sesamum indicum]	--	--	--	--	--	-	-	-	http://www.genome.jp/dbget-bin/www_bget?ko:-	I3PFJ5	206	1.7e-15	Cytochrome P450 76AD1 OS=Beta vulgaris OX=161934 GN=CYP76AD1 PE=2 SV=1	PF00067	Cytochrome P450	GO:0055114	oxidation-reduction process	GO:0005506//GO:0020037//GO:0016705	iron ion binding//heme binding//oxidoreductase activity, acting on paired donors, with incorporation or reduction of molecular oxygen	--	--	--	--	FALSE	-3.05854	1	FALSE	-3.06068	0.188068	FALSE	-5.97265	0.0376684	FALSE	-2.90649	1	FALSE	-5.73599	0.0636174
Cluster-5013.0	0	0	0	0	1.6	384	848887956	XP_012844198.1	330	1.5e-28	PREDICTED: cytochrome P450 71A1-like [Erythranthe guttata]	--	--	--	--	--	-	-	-	http://www.genome.jp/dbget-bin/www_bget?ko:-	O81970	212	2.8e-16	Cytochrome P450 71A9 OS=Glycine max OX=3847 GN=CYP71A9 PE=2 SV=1	PF00067	Cytochrome P450	GO:0055114	oxidation-reduction process	GO:0016705//GO:0020037//GO:0005506	oxidoreductase activity, acting on paired donors, with incorporation or reduction of molecular oxygen//heme binding//iron ion binding	--	--	--	--	FALSE	-5.13e-15	1	FALSE	-5.58029	0.144338	FALSE	-5.49639	0.165707	FALSE	0	1	FALSE	-5.26135	0.169928
Cluster-11149.41554	1.26	0	0	2.47	7.32	456	1276271721	PIN27094.1	299	7e-25	Cytochrome P450 CYP2 subfamily [Handroanthus impetiginosus]	XM_024313551.1	XM_024313551	65	3.7e-23	PREDICTED: Rosa chinensis flavonoid 3'-monooxygenase-like (LOC112175801), mRNA	-	-	-	http://www.genome.jp/dbget-bin/www_bget?ko:-	P48421	128	1.8e-06	Cytochrome P450 83A1 OS=Arabidopsis thaliana OX=3702 GN=CYP83A1 PE=1 SV=2	PF00067	Cytochrome P450	GO:0055114	oxidation-reduction process	GO:0016705//GO:0020037//GO:0005506	oxidoreductase activity, acting on paired donors, with incorporation or reduction of molecular oxygen//heme binding//iron ion binding	--	--	--	--	FALSE	-6.47534	0.0167985	FALSE	-1.95624	0.0148924	DOWN	-8.27608	2.86e-07	FALSE	-0.316174	1	FALSE	-2.31754	0.00793546
Cluster-11149.4530	0.1	0.11	0	7.84	4.65	667	747041067	XP_011070677.1	484	3.6e-46	cytochrome P450 76C4-like [Sesamum indicum]	--	--	--	--	--	-	-	-	http://www.genome.jp/dbget-bin/www_bget?ko:-	W8JCE8	198	2e-14	Cytochrome P450 71BT1 OS=Catharanthus roseus OX=4058 GN=CYP71BT1 PE=2 SV=1	PF00067	Cytochrome P450	GO:0055114	oxidation-reduction process	GO:0005506//GO:0020037//GO:0016705	iron ion binding//heme binding//oxidoreductase activity, acting on paired donors, with incorporation or reduction of molecular oxygen	--	--	--	--	DOWN	-5.8502	1.45e-09	FALSE	0.352751	0.796404	DOWN	-5.57891	1.28e-07	DOWN	-5.458	6.92e-08	DOWN	-5.12978	9.89e-07
Cluster-11149.44440	0	0	0	1.94	0.56	402	1371491524	PSR87948.1	406	2.4e-37	Cytochrome P450 81E8 like [Actinidia chinensis var. chinensis]	--	--	--	--	--	-	-	-	http://www.genome.jp/dbget-bin/www_bget?ko:-	W8JMU7	355	7.5e-33	Cytochrome P450 81Q32 OS=Catharanthus roseus OX=4058 GN=CYP81Q32 PE=2 SV=1	PF00067	Cytochrome P450	GO:0055114	oxidation-reduction process	GO:0005506//GO:0020037//GO:0016705	iron ion binding//heme binding//oxidoreductase activity, acting on paired donors, with incorporation or reduction of molecular oxygen	--	--	--	--	FALSE	-5.70927	0.101362	FALSE	1.33693	0.622538	FALSE	-4.22162	0.705108	FALSE	-5.5387	0.148189	FALSE	-3.99477	0.718417
Cluster-1358.0	0	0	0	0	1.26	524	1343996814	XP_023880537.1	317	6.6e-27	cytochrome P450 monooxygenase psoD-like [Quercus suber]	--	--	--	--	--	-	-	-	http://www.genome.jp/dbget-bin/www_bget?ko:-	A8NCK4	408	7.1e-39	Cytochrome P450 monooxygenase COX1 OS=Coprinopsis cinerea (strain Okayama-7 / 130 / ATCC MYA-4618 / FGSC 9003) OX=240176 GN=COX1 PE=1 SV=2	PF00067	Cytochrome P450	GO:0055114	oxidation-reduction process	GO:0005506//GO:0020037//GO:0016705	iron ion binding//heme binding//oxidoreductase activity, acting on paired donors, with incorporation or reduction of molecular oxygen	--	--	KOG0156	Cytochrome P450 CYP2 subfamily	FALSE	-5.13e-15	1	FALSE	-6.24701	0.036604	FALSE	-6.16242	0.0233754	FALSE	0	1	FALSE	-5.92525	0.0393902
Cluster-11149.3848	0	0	0	8.53	6.54	364	747040459	XP_011082374.1	305	1.1e-25	premnaspirodiene oxygenase [Sesamum indicum]	--	--	--	--	--	-	-	-	http://www.genome.jp/dbget-bin/www_bget?ko:-	Q96514	190	9.2e-14	Cytochrome P450 71B7 OS=Arabidopsis thaliana OX=3702 GN=CYP71B7 PE=1 SV=1	PF00067	Cytochrome P450	GO:0055114	oxidation-reduction process	GO:0020037//GO:0005506//GO:0016705	heme binding//iron ion binding//oxidoreductase activity, acting on paired donors, with incorporation or reduction of molecular oxygen	--	--	--	--	DOWN	-7.41858	0.000162501	FALSE	-0.0210432	1	DOWN	-7.284	0.000277514	DOWN	-7.24556	0.000493704	DOWN	-7.04486	0.000695485
Cluster-2911.0	0	0	0	0	1.92	655	--	--	--	--	--	--	--	--	--	--	--	--	--	--	A8NCK6	189	2.2e-13	Cytochrome P450 monooxygenase COX2 OS=Coprinopsis cinerea (strain Okayama-7 / 130 / ATCC MYA-4618 / FGSC 9003) OX=240176 GN=COX2 PE=1 SV=1	PF00067	Cytochrome P450	GO:0055114	oxidation-reduction process	GO:0016705//GO:0005506//GO:0020037	oxidoreductase activity, acting on paired donors, with incorporation or reduction of molecular oxygen//iron ion binding//heme binding	--	--	--	--	FALSE	-5.13e-15	1	DOWN	-7.40635	0.000334225	DOWN	-7.32111	0.000277514	FALSE	0	1	DOWN	-7.08192	0.000695485
Cluster-2911.1	0	0	0	0	2.24	906	1219086276	XP_021769314.1	333	1.6e-28	isoflavone 2'-hydroxylase-like [Chenopodium quinoa]	--	--	--	--	--	-	-	-	http://www.genome.jp/dbget-bin/www_bget?ko:-	Q4WAZ6	526	2.5e-52	Multifunctional cytochrome P450 monooxygenase af510 OS=Neosartorya fumigata (strain ATCC MYA-4609 / Af293 / CBS 101355 / FGSC A1100) OX=330879 GN=af510 PE=1 SV=1	PF00067	Cytochrome P450	GO:0055114	oxidation-reduction process	GO:0016705//GO:0005506//GO:0020037	oxidoreductase activity, acting on paired donors, with incorporation or reduction of molecular oxygen//iron ion binding//heme binding	--	--	--	--	FALSE	-5.13e-15	1	DOWN	-8.31988	5.76e-07	DOWN	-8.2344	3.92e-07	FALSE	0	1	DOWN	-7.99444	2.29e-06
Cluster-11149.49289	0	0	0	0	4.15	341	--	--	--	--	--	--	--	--	--	--	--	--	--	--	W7LC91	132	4.6e-07	Cytochrome P450 monooxygenase FUM15 OS=Gibberella moniliformis (strain M3125 / FGSC 7600) OX=334819 GN=FUM15 PE=3 SV=1	PF00067	Cytochrome P450	GO:0055114	oxidation-reduction process	GO:0016705//GO:0020037//GO:0005506	oxidoreductase activity, acting on paired donors, with incorporation or reduction of molecular oxygen//heme binding//iron ion binding	--	--	--	--	FALSE	-5.13e-15	1	FALSE	-6.41483	0.0234343	FALSE	-6.33011	0.0146451	FALSE	0	1	FALSE	-6.09253	0.0245024
Cluster-2844.0	0	0	0	0	1.49	511	226455808	EEH53110.1	174	2.5e-10	predicted protein [Micromonas pusilla CCMP1545]	--	--	--	--	--	-	-	-	http://www.genome.jp/dbget-bin/www_bget?ko:-	Q9VYQ7	170	2.7e-11	Probable cytochrome P450 311a1 OS=Drosophila melanogaster OX=7227 GN=Cyp311a1 PE=2 SV=1	PF00067	Cytochrome P450	GO:0055114	oxidation-reduction process	GO:0005506//GO:0020037//GO:0016705	iron ion binding//heme binding//oxidoreductase activity, acting on paired donors, with incorporation or reduction of molecular oxygen	--	--	--	--	FALSE	-5.13e-15	1	FALSE	-6.41483	0.0234343	FALSE	-6.33011	0.0146451	FALSE	0	1	FALSE	-6.09253	0.0245024
Cluster-11149.46030	0	0.41	0	10.41	28.73	350	1173798717	XP_011081376.2	254	8.9e-20	geraniol 8-hydroxylase-like [Sesamum indicum]	--	--	--	--	--	-	-	-	http://www.genome.jp/dbget-bin/www_bget?ko:-	W8JMU7	137	1.2e-07	Cytochrome P450 81Q32 OS=Catharanthus roseus OX=4058 GN=CYP81Q32 PE=2 SV=1	PF00067	Cytochrome P450	GO:0055114	oxidation-reduction process	GO:0005506//GO:0020037//GO:0016705	iron ion binding//heme binding//oxidoreductase activity, acting on paired donors, with incorporation or reduction of molecular oxygen	--	--	--	--	DOWN	-4.23257	0.000800264	DOWN	-1.86227	0.00436081	DOWN	-6.1765	3.42e-10	DOWN	-7.35268	0.000331033	DOWN	-8.99161	2.65e-10
Cluster-938.0	0	0	0	0	1.43	369	--	--	--	--	--	--	--	--	--	--	--	--	--	--	A8NCK6	158	4.8e-10	Cytochrome P450 monooxygenase COX2 OS=Coprinopsis cinerea (strain Okayama-7 / 130 / ATCC MYA-4618 / FGSC 9003) OX=240176 GN=COX2 PE=1 SV=1	PF00067	Cytochrome P450	GO:0055114	oxidation-reduction process	GO:0005506//GO:0020037//GO:0016705	iron ion binding//heme binding//oxidoreductase activity, acting on paired donors, with incorporation or reduction of molecular oxygen	--	--	--	--	FALSE	-5.13e-15	1	FALSE	-5.26588	0.357601	FALSE	-5.18243	0.273386	FALSE	0	1	FALSE	-4.9488	0.278772
Cluster-5847.0	0	0	0	1.8	1.82	317	848916479	XP_012855807.1	227	1.1e-16	PREDICTED: ferruginol synthase-like [Erythranthe guttata]	--	--	--	--	--	-	-	-	http://www.genome.jp/dbget-bin/www_bget?ko:-	W8JMV1	197	1.2e-14	Cytochrome P450 76T24 OS=Catharanthus roseus OX=4058 GN=CYP76T24 PE=2 SV=1	PF00067	Cytochrome P450	GO:0055114	oxidation-reduction process	GO:0016705//GO:0020037//GO:0005506	oxidoreductase activity, acting on paired donors, with incorporation or reduction of molecular oxygen//heme binding//iron ion binding	--	--	--	--	FALSE	-4.52318	0.566119	FALSE	-0.407784	1	FALSE	-4.78057	0.441562	FALSE	-4.35711	0.806498	FALSE	-4.54925	0.44892
Cluster-2160.1	0	0	0	0	2.18	1002	326515362	BAK03594.1	878	1.1e-91	predicted protein [Hordeum vulgare subsp. vulgare]	--	--	--	--	--	K15401	CYP86A1	fatty acid omega-hydroxylase	http://www.genome.jp/dbget-bin/www_bget?ko:K15401	S0ARX1	478	1e-46	Cytochrome P450 monooxygenase fsdH OS=Fusarium heterosporum OX=42747 GN=fsdH PE=3 SV=1	PF00067	Cytochrome P450	GO:0055114	oxidation-reduction process	GO:0005506//GO:0020037//GO:0016705	iron ion binding//heme binding//oxidoreductase activity, acting on paired donors, with incorporation or reduction of molecular oxygen	--	--	--	--	FALSE	-5.13e-15	1	DOWN	-8.47987	1.27e-07	DOWN	-8.39436	1.13e-07	FALSE	0	1	DOWN	-8.15431	6.01e-07
Cluster-2480.0	0	0	0	0	1.7	427	326515362	BAK03594.1	250	3.2e-19	predicted protein [Hordeum vulgare subsp. vulgare]	--	--	--	--	--	-	-	-	http://www.genome.jp/dbget-bin/www_bget?ko:-	D4AY62	267	1.3e-22	Cytochrome P450 ARB_01131 OS=Arthroderma benhamiae (strain ATCC MYA-4681 / CBS 112371) OX=663331 GN=ARB_01131 PE=3 SV=1	PF00067	Cytochrome P450	GO:0055114	oxidation-reduction process	GO:0005506//GO:0020037//GO:0016705	iron ion binding//heme binding//oxidoreductase activity, acting on paired donors, with incorporation or reduction of molecular oxygen	--	--	--	--	FALSE	-5.13e-15	1	FALSE	-6.05708	0.0575446	FALSE	-5.97265	0.0376684	FALSE	0	1	FALSE	-5.73599	0.0636174
Cluster-11149.1381	0	0.63	0	2.52	17.57	384	747093271	XP_011094433.1	507	4.5e-49	cytochrome P450 76A1-like [Sesamum indicum]	--	--	--	--	--	K20618	CYP76A	cytochrome P450 family 76 subfamily A	http://www.genome.jp/dbget-bin/www_bget?ko:K20618	W8JIS5	394	2.2e-37	Iridoid oxidase OS=Catharanthus roseus OX=4058 GN=IO PE=1 SV=1	PF00067	Cytochrome P450	GO:0055114	oxidation-reduction process	GO:0020037//GO:0005506//GO:0016705	heme binding//iron ion binding//oxidoreductase activity, acting on paired donors, with incorporation or reduction of molecular oxygen	--	--	--	--	FALSE	-1.68255	0.521897	DOWN	-3.18274	9.47e-06	DOWN	-4.96176	7.96e-09	FALSE	-5.72923	0.093697	DOWN	-8.68749	5.35e-09
Cluster-5838.0	0	0	0	0.16	1.32	511	1343966410	XP_023912201.1	377	7.1e-34	benzoate 4-monooxygenase-like [Quercus suber]	--	--	--	--	--	K20660	CYP709	cytochrome P450 family 709	http://www.genome.jp/dbget-bin/www_bget?ko:K20660	P17549	354	1.3e-32	Benzoate 4-monooxygenase OS=Aspergillus niger OX=5061 GN=bphA PE=1 SV=1	PF00067	Cytochrome P450	GO:0055114	oxidation-reduction process	GO:0016705//GO:0020037//GO:0005506	oxidoreductase activity, acting on paired donors, with incorporation or reduction of molecular oxygen//heme binding//iron ion binding	--	--	--	--	FALSE	-3.05854	1	FALSE	-3.25061	0.13038	FALSE	-6.16242	0.0233754	FALSE	-2.90649	1	FALSE	-5.92525	0.0393902
Cluster-11149.46029	0	0	0	5.3	10.77	385	747068814	XP_011081183.1	527	2.2e-51	cytochrome P450 76C1-like [Sesamum indicum]	XM_011083075.2	XM_011083075	149	6.2e-70	PREDICTED: Sesamum indicum cytochrome P450 76C1-like (LOC105164423), mRNA	-	-	-	http://www.genome.jp/dbget-bin/www_bget?ko:-	A6YIH8	236	4.6e-19	Premnaspirodiene oxygenase OS=Hyoscyamus muticus OX=35626 GN=CYP71D55 PE=1 SV=1	PF00067	Cytochrome P450	GO:0055114	oxidation-reduction process	GO:0016705//GO:0020037//GO:0005506	oxidoreductase activity, acting on paired donors, with incorporation or reduction of molecular oxygen//heme binding//iron ion binding	--	--	--	--	DOWN	-6.97306	0.00189791	FALSE	-1.41706	0.0788127	DOWN	-8.2344	3.92e-07	DOWN	-6.80044	0.00407161	DOWN	-7.99444	2.29e-06
Cluster-4780.2	0	0	0	0	3.78	301	848897069	XP_012848608.1	454	4.9e-43	PREDICTED: cytochrome P450 71D9-like [Erythranthe guttata]	XM_024174125.1	XM_024174125	75	6.46e-29	PREDICTED: Morus notabilis cytochrome P450 71D11 (LOC21412208), mRNA	-	-	-	http://www.genome.jp/dbget-bin/www_bget?ko:-	A0A343URW6	380	7.2e-36	Tabersonine 6,7-epoxidase isoform 1 OS=Catharanthus roseus OX=4058 GN=TEX1 PE=1 SV=1	PF00067	Cytochrome P450	GO:0055114	oxidation-reduction process	GO:0020037//GO:0005506//GO:0016705	heme binding//iron ion binding//oxidoreductase activity, acting on paired donors, with incorporation or reduction of molecular oxygen	--	--	--	--	FALSE	-5.13e-15	1	FALSE	-5.58029	0.144338	FALSE	-5.49639	0.165707	FALSE	0	1	FALSE	-5.26135	0.169928
Cluster-11149.45029	0.81	0.25	0	10.54	40.93	1305	1173798717	XP_011081376.2	1829	7.8e-202	geraniol 8-hydroxylase-like [Sesamum indicum]	XM_011083075.2	XM_011083075	532	0	PREDICTED: Sesamum indicum cytochrome P450 76C1-like (LOC105164423), mRNA	-	-	-	http://www.genome.jp/dbget-bin/www_bget?ko:-	A0A4D6Q415	739	7.3e-77	Flavonoid 3'-monooxygenase CYP75B137 OS=Crocosmia x crocosmiiflora OX=1053288 GN=CYP75B137 PE=1 SV=1	PF08362//PF00067	YcdC-like protein, C-terminal region//Cytochrome P450	GO:0055114//GO:0045892	oxidation-reduction process//negative regulation of transcription, DNA-templated	GO:0016705//GO:0020037//GO:0005506	oxidoreductase activity, acting on paired donors, with incorporation or reduction of molecular oxygen//heme binding//iron ion binding	--	--	--	--	DOWN	-5.16412	8.6e-15	DOWN	-2.35419	1.68e-06	DOWN	-7.62369	1.36e-30	DOWN	-3.03202	1.64e-07	DOWN	-5.43476	1.29e-21
Cluster-11149.46148	0	0	0	0.32	0.75	383	747041067	XP_011070677.1	436	7.7e-41	cytochrome P450 76C4-like [Sesamum indicum]	--	--	--	--	--	-	-	-	http://www.genome.jp/dbget-bin/www_bget?ko:-	I1TEM1	242	9.1e-20	Tabersonine 3-oxygenase OS=Catharanthus roseus OX=4058 GN=CYP71D1V2 PE=1 SV=1	PF00067	Cytochrome P450	GO:0055114	oxidation-reduction process	GO:0016705//GO:0005506//GO:0020037	oxidoreductase activity, acting on paired donors, with incorporation or reduction of molecular oxygen//iron ion binding//heme binding	--	--	--	--	FALSE	-3.08371	1	FALSE	-1.49142	0.909352	FALSE	-4.43095	0.441562	FALSE	-2.93128	1	FALSE	-4.20223	0.718417
Cluster-11149.47127	0	0	0	1.43	7.97	904	1276261446	PIN18284.1	899	3.7e-94	Cytochrome P450 CYP2 subfamily [Handroanthus impetiginosus]	--	--	--	--	--	-	-	-	http://www.genome.jp/dbget-bin/www_bget?ko:-	Q8VWZ7	437	5.3e-42	geraniol 8-hydroxylase OS=Catharanthus roseus OX=4058 GN=CYP76B6 PE=1 SV=1	PF00067	Cytochrome P450	GO:0055114	oxidation-reduction process	GO:0020037//GO:0005506//GO:0016705	heme binding//iron ion binding//oxidoreductase activity, acting on paired donors, with incorporation or reduction of molecular oxygen	--	--	--	--	DOWN	-7.34242	0.000360496	DOWN	-2.87324	1.09e-06	DOWN	-10.0596	1.06e-15	DOWN	-7.16946	0.00074173	DOWN	-9.81903	2.17e-14
Cluster-18115.0	0	0	0	1.19	1.01	464	1276250463	PIN09372.1	727	1.7e-74	Cytochrome P450 CYP4/CYP19/CYP26 subfamily [Handroanthus impetiginosus]	XM_011073790.2	XM_011073790	334	1.1e-172	PREDICTED: Sesamum indicum abietadienol/abietadienal oxidase (LOC105157379), transcript variant X3, mRNA	-	-	-	http://www.genome.jp/dbget-bin/www_bget?ko:-	Q50EK6	347	7.4e-32	Abietadienol/abietadienal oxidase OS=Pinus taeda OX=3352 GN=CYP720B1 PE=1 SV=1	PF00067	Cytochrome P450	GO:0055114	oxidation-reduction process	GO:0020037//GO:0005506//GO:0016705	heme binding//iron ion binding//oxidoreductase activity, acting on paired donors, with incorporation or reduction of molecular oxygen	--	--	--	--	FALSE	-5.49146	0.158449	FALSE	-0.158044	1	FALSE	-5.49639	0.165707	FALSE	-5.32147	0.233253	FALSE	-5.26135	0.169928
Cluster-7320.0	0	0	0	0.64	1.14	515	1276241617	PIN02757.1	504	1.3e-48	Cytochrome P450 CYP2 subfamily [Handroanthus impetiginosus]	--	--	--	--	--	-	-	-	http://www.genome.jp/dbget-bin/www_bget?ko:-	Q9FXW4	344	1.8e-31	Probable (S)-N-methylcoclaurine 3'-hydroxylase isozyme 2 OS=Coptis japonica OX=3442 GN=CYP80B2 PE=2 SV=1	PF00067	Cytochrome P450	GO:0055114	oxidation-reduction process	GO:0020037//GO:0005506//GO:0016705	heme binding//iron ion binding//oxidoreductase activity, acting on paired donors, with incorporation or reduction of molecular oxygen	--	--	--	--	FALSE	-4.92245	0.380656	FALSE	-1.20307	0.554165	FALSE	-5.97265	0.0376684	FALSE	-4.75444	0.557126	FALSE	-5.73599	0.0636174
Cluster-11149.46471	0.24	0	0	1.61	93.13	354	1276234230	PIM98211.1	460	1.2e-43	Cytochrome P450 CYP2 subfamily [Handroanthus impetiginosus]	--	--	--	--	--	-	-	-	http://www.genome.jp/dbget-bin/www_bget?ko:-	Q9SP06	123	5.3e-06	(S)-N-methylcoclaurine 3'-hydroxylase isozyme 1 (Fragment) OS=Papaver somniferum OX=3469 GN=CYP80B3 PE=1 SV=1	PF00067	Cytochrome P450	GO:0055114	oxidation-reduction process	GO:0020037//GO:0005506//GO:0016705	heme binding//iron ion binding//oxidoreductase activity, acting on paired donors, with incorporation or reduction of molecular oxygen	--	--	--	--	FALSE	-4.92245	0.380656	DOWN	-6.21231	1.09e-17	DOWN	-10.9806	3.45e-21	FALSE	-1.93986	0.942231	DOWN	-8.1565	1.87e-18
Cluster-11149.46470	0.38	0.32	0	4.77	49.52	1485	1276234230	PIM98211.1	1860	2.3e-205	Cytochrome P450 CYP2 subfamily [Handroanthus impetiginosus]	XM_011085602.2	XM_011085602	420	0	PREDICTED: Sesamum indicum probable (S)-N-methylcoclaurine 3'-hydroxylase isozyme 2 (LOC105166294), mRNA	-	-	-	http://www.genome.jp/dbget-bin/www_bget?ko:-	Q9FXW4	765	8.1e-80	Probable (S)-N-methylcoclaurine 3'-hydroxylase isozyme 2 OS=Coptis japonica OX=3442 GN=CYP80B2 PE=2 SV=1	PF00067//PF00721	Cytochrome P450//Virus coat protein (TMV like)	GO:0055114	oxidation-reduction process	GO:0016705//GO:0005198//GO:0005506//GO:0020037	oxidoreductase activity, acting on paired donors, with incorporation or reduction of molecular oxygen//structural molecule activity//iron ion binding//heme binding	GO:0019028	viral capsid	--	--	DOWN	-3.67432	1.65e-08	DOWN	-3.77093	8.28e-14	DOWN	-7.55246	3.15e-32	DOWN	-2.97127	4.2e-06	DOWN	-6.78953	1.61e-28
Cluster-11149.45206	0	0	0	3.28	1.82	535	1276242695	PIN03538.1	483	3.8e-46	Cytochrome P450 CYP2 subfamily [Handroanthus impetiginosus]	XM_011097520.2	XM_011097520	116	1.95e-51	PREDICTED: Sesamum indicum flavonoid 3'-monooxygenase-like (LOC105175169), mRNA	-	-	-	http://www.genome.jp/dbget-bin/www_bget?ko:-	A0A1D6F9Y9	297	5.4e-26	Trimethyltridecatetraene synthase OS=Zea mays OX=4577 GN=CYP92C6 PE=1 SV=1	PF00067	Cytochrome P450	GO:0055114	oxidation-reduction process	GO:0016705//GO:0005506//GO:0020037	oxidoreductase activity, acting on paired donors, with incorporation or reduction of molecular oxygen//iron ion binding//heme binding	--	--	--	--	DOWN	-7.34242	0.000360496	FALSE	0.44641	0.877181	DOWN	-6.74066	0.00373694	DOWN	-7.16946	0.00074173	FALSE	-6.50228	0.00984351
Cluster-2441.0	0	0	0	0	2.7	618	1344032796	XP_023899566.1	306	1.5e-25	eburicol 14-alpha-demethylase-like [Quercus suber]	--	--	--	--	--	K05917	CYP51	sterol 14-demethylase	http://www.genome.jp/dbget-bin/www_bget?ko:K05917	P49602	514	4.3e-51	Lanosterol 14-alpha demethylase OS=Ustilago maydis (strain 521 / FGSC 9021) OX=237631 GN=ERG11 PE=3 SV=1	PF00067	Cytochrome P450	GO:0055114	oxidation-reduction process	GO:0016705//GO:0020037//GO:0005506	oxidoreductase activity, acting on paired donors, with incorporation or reduction of molecular oxygen//heme binding//iron ion binding	--	--	KOG0684	Cytochrome P450	FALSE	-5.13e-15	1	DOWN	-7.75813	3.28e-05	DOWN	-7.67279	2.56e-05	FALSE	0	1	DOWN	-7.43324	8.96e-05
Cluster-1675.0	0	0	0	0	1.92	565	1344053759	XP_023910195.1	353	4.8e-31	benzoate 4-monooxygenase-like [Quercus suber]	--	--	--	--	--	-	-	-	http://www.genome.jp/dbget-bin/www_bget?ko:-	P17549	295	9.7e-26	Benzoate 4-monooxygenase OS=Aspergillus niger OX=5061 GN=bphA PE=1 SV=1	PF00067	Cytochrome P450	GO:0055114	oxidation-reduction process	GO:0016705//GO:0005506//GO:0020037	oxidoreductase activity, acting on paired donors, with incorporation or reduction of molecular oxygen//iron ion binding//heme binding	--	--	--	--	FALSE	-5.13e-15	1	DOWN	-7.0462	0.00170683	DOWN	-6.96112	0.00152724	FALSE	0	1	DOWN	-6.72239	0.00398727
Cluster-1839.0	0	0	0	0	1.01	332	--	--	--	--	--	--	--	--	--	--	--	--	--	--	--	--	--	--	PF00067	Cytochrome P450	GO:0055114	oxidation-reduction process	GO:0005506//GO:0020037//GO:0016705	iron ion binding//heme binding//oxidoreductase activity, acting on paired donors, with incorporation or reduction of molecular oxygen	--	--	--	--	FALSE	-5.13e-15	1	FALSE	-4.3029	0.796404	FALSE	-4.22162	0.705108	FALSE	0	1	FALSE	-3.99477	0.718417
Cluster-11149.1723	0	0	0	0.67	13.78	3272	1343990774	XP_023877369.1	1460	1.2e-158	LOW QUALITY PROTEIN: linoleate 10R-lipoxygenase-like [Quercus suber]	--	--	--	--	--	-	-	-	http://www.genome.jp/dbget-bin/www_bget?ko:-	B0Y6R2	1525	1.3e-167	Psi-producing oxygenase A OS=Neosartorya fumigata (strain CEA10 / CBS 144.89 / FGSC A1163) OX=451804 GN=ppoA PE=3 SV=1	PF00067//PF17209	Cytochrome P450//Hfq protein	GO:0055114//GO:0006355	oxidation-reduction process//regulation of transcription, DNA-templated	GO:0005506//GO:0020037//GO:0016705//GO:0003723	iron ion binding//heme binding//oxidoreductase activity, acting on paired donors, with incorporation or reduction of molecular oxygen//RNA binding	--	--	KOG2408	Peroxidase/oxygenase	DOWN	-8.46313	9.67e-08	DOWN	-4.7559	1.91e-18	DOWN	-13.0627	4.58e-35	DOWN	-8.28955	4.16e-06	DOWN	-12.8219	2.2e-33
Cluster-11149.4409	0	0.12	0	3.83	25.63	1772	747055279	XP_011073878.1	1953	4.4e-216	premnaspirodiene oxygenase-like [Sesamum indicum]	XM_011075576.2	XM_011075576	547	0	PREDICTED: Sesamum indicum premnaspirodiene oxygenase-like (LOC105158737), mRNA	-	-	-	http://www.genome.jp/dbget-bin/www_bget?ko:-	A6YIH8	1303	4e-142	Premnaspirodiene oxygenase OS=Hyoscyamus muticus OX=35626 GN=CYP71D55 PE=1 SV=1	PF00067	Cytochrome P450	GO:0055114	oxidation-reduction process	GO:0016705//GO:0020037//GO:0005506	oxidoreductase activity, acting on paired donors, with incorporation or reduction of molecular oxygen//heme binding//iron ion binding	--	--	--	--	DOWN	-4.80762	9.3e-11	DOWN	-3.13728	3.23e-10	DOWN	-8.04768	3.96e-31	DOWN	-9.81209	9.31e-13	DOWN	-12.726	1.01e-32
Cluster-11149.6601	2.06	0.51	0	1.51	1.28	418	848893860	XP_012846971.1	472	5.6e-45	PREDICTED: flavonoid 3',5'-hydroxylase-like [Erythranthe guttata]	XM_012978161.1	XM_012978161	103	2.53e-44	PREDICTED: Erythranthe guttatus flavonoid 3',5'-hydroxylase 1-like (LOC105954490), mRNA	-	-	-	http://www.genome.jp/dbget-bin/www_bget?ko:-	O04773	329	8.2e-30	Flavonoid 3',5'-hydroxylase OS=Campanula medium OX=56154 GN=CYP75A6 PE=2 SV=1	PF00067	Cytochrome P450	GO:0055114	oxidation-reduction process	GO:0016705//GO:0020037//GO:0005506	oxidoreductase activity, acting on paired donors, with incorporation or reduction of molecular oxygen//heme binding//iron ion binding	--	--	--	--	FALSE	-1.27378	0.651408	FALSE	-0.158044	1	FALSE	-1.53037	0.700223	FALSE	1.07501	0.715601	FALSE	0.865382	0.717726
Cluster-11149.47047	0	0	0	0	7.78	318	848913154	XP_012854715.1	209	1.3e-14	PREDICTED: dammarenediol 12-hydroxylase-like [Erythranthe guttata]	XM_011100842.2	XM_011100842	99	3.13e-42	PREDICTED: Sesamum indicum beta-amyrin 28-oxidase-like (LOC105177626), mRNA	K20667	CYP716A	beta-amyrin 28-monooxygenase	http://www.genome.jp/dbget-bin/www_bget?ko:K20667	Q2MJ20	167	3.8e-11	Beta-amyrin 28-monooxygenase OS=Medicago truncatula OX=3880 GN=CYP716A12 PE=1 SV=1	PF00067	Cytochrome P450	GO:0055114	oxidation-reduction process	GO:0005506//GO:0020037//GO:0016705	iron ion binding//heme binding//oxidoreductase activity, acting on paired donors, with incorporation or reduction of molecular oxygen	--	--	--	--	FALSE	-5.13e-15	1	DOWN	-6.94013	0.00260569	DOWN	-6.8551	0.00238337	FALSE	0	1	FALSE	-6.61653	0.00625347
Cluster-11149.3399	0	0	0	8.52	4.73	1933	1600644967	TEY28852.1	994	7.7e-105	steroid 3-oxidase [Salvia splendens]	XM_011074202.2	XM_011074202	771	0	PREDICTED: Sesamum indicum 3-epi-6-deoxocathasterone 23-monooxygenase (LOC105157742), mRNA	K12638	CYP90D1	3-epi-6-deoxocathasterone 23-monooxygenase	http://www.genome.jp/dbget-bin/www_bget?ko:K12638	Q94IA6	828	5.2e-87	3-epi-6-deoxocathasterone 23-monooxygenase CYP90D1 OS=Arabidopsis thaliana OX=3702 GN=CYP90D1 PE=1 SV=1	PF00067	Cytochrome P450	GO:0055114	oxidation-reduction process	GO:0016705//GO:0020037//GO:0005506	oxidoreductase activity, acting on paired donors, with incorporation or reduction of molecular oxygen//heme binding//iron ion binding	--	--	--	--	DOWN	-11.284	1.47e-21	FALSE	0.453137	0.595252	DOWN	-10.6744	2.68e-19	DOWN	-11.11	2.82e-20	DOWN	-10.4337	7.08e-18
Cluster-11149.47043	0.03	0	0	0.3	2.47	1504	747045757	XP_011095827.1	1557	3.1e-170	flavonoid 3'-monooxygenase-like [Sesamum indicum]	LC199945.1	LC199945	441	0	Sesamum indicum LOC105175177 mRNA for hypothetical protein, complete cds	-	-	-	http://www.genome.jp/dbget-bin/www_bget?ko:-	A0A1D6HSP4	879	4.9e-93	Dimethylnonatriene synthase OS=Zea mays OX=4577 GN=CYP92C5 PE=1 SV=1	PF00067	Cytochrome P450	GO:0055114	oxidation-reduction process	GO:0020037//GO:0005506//GO:0016705	heme binding//iron ion binding//oxidoreductase activity, acting on paired donors, with incorporation or reduction of molecular oxygen	--	--	--	--	FALSE	-6.0657	0.0663758	DOWN	-3.404	7.83e-07	DOWN	-9.31433	1.05e-11	FALSE	-2.38272	0.502231	DOWN	-5.80945	1.42e-09
Cluster-11149.46690	0	0	0	3.74	2.17	408	848920114	XP_012857009.1	215	3.5e-15	PREDICTED: geraniol 8-hydroxylase-like [Erythranthe guttata]	--	--	--	--	--	-	-	-	http://www.genome.jp/dbget-bin/www_bget?ko:-	--	--	--	--	PF00067	Cytochrome P450	GO:0055114	oxidation-reduction process	GO:0016705//GO:0020037//GO:0005506	oxidoreductase activity, acting on paired donors, with incorporation or reduction of molecular oxygen//heme binding//iron ion binding	--	--	--	--	FALSE	-6.69541	0.00700451	FALSE	0.378274	0.976518	FALSE	-6.16242	0.0233754	FALSE	-6.5231	0.00968287	FALSE	-5.92525	0.0393902
Cluster-11149.44812	0	0.05	0	64.31	22.21	1943	747105261	XP_011100902.1	2345	1.7e-261	alkane hydroxylase MAH1-like [Sesamum indicum]	XM_022988628.1	XM_022988628	437	0	PREDICTED: Olea europaea var. sylvestris alkane hydroxylase MAH1 (LOC111367643), mRNA	-	-	-	http://www.genome.jp/dbget-bin/www_bget?ko:-	Q9FVS9	1228	2.2e-133	Alkane hydroxylase MAH1 OS=Arabidopsis thaliana OX=3702 GN=CYP96A15 PE=2 SV=1	PF00067	Cytochrome P450	GO:0055114	oxidation-reduction process	GO:0016705//GO:0020037//GO:0005506	oxidoreductase activity, acting on paired donors, with incorporation or reduction of molecular oxygen//heme binding//iron ion binding	--	--	--	--	DOWN	-9.99018	1.24e-39	FALSE	1.13748	0.0353836	DOWN	-8.9478	1e-32	DOWN	-14.0338	3.98e-39	DOWN	-12.673	2.39e-32
Cluster-11149.47806	0	0	0	0.17	7.67	998	1343985432	XP_023874588.1	282	1.4e-22	psi-producing oxygenase A-like [Quercus suber]	--	--	--	--	--	K20667	CYP716A	beta-amyrin 28-monooxygenase	http://www.genome.jp/dbget-bin/www_bget?ko:K20667	G5EB19	299	5.9e-26	Psi-producing oxygenase A OS=Emericella nidulans (strain FGSC A4 / ATCC 38163 / CBS 112.46 / NRRL 194 / M139) OX=227321 GN=ppoA PE=3 SV=1	PF00067	Cytochrome P450	GO:0055114	oxidation-reduction process	GO:0016705//GO:0005506//GO:0020037	oxidoreductase activity, acting on paired donors, with incorporation or reduction of molecular oxygen//iron ion binding//heme binding	--	--	--	--	FALSE	-4.52318	0.566119	DOWN	-5.82882	4.13e-14	DOWN	-10.1987	1.81e-16	FALSE	-4.35711	0.806498	DOWN	-9.95804	3.46e-15
Cluster-11149.9480	1.44	0	0	8.21	17.08	844	1173765647	XP_020551955.1	517	6.9e-50	geraniol 8-hydroxylase-like [Sesamum indicum]	--	--	--	--	--	-	-	-	http://www.genome.jp/dbget-bin/www_bget?ko:-	P98183	219	9.4e-17	Tabersonine 16-hydroxylase 1 OS=Catharanthus roseus OX=4058 GN=CYP71D12 PE=1 SV=2	PF03592//PF00067	Terminase small subunit//Cytochrome P450	GO:0055114//GO:0006323	oxidation-reduction process//DNA packaging	GO:0016705//GO:0020037//GO:0005506	oxidoreductase activity, acting on paired donors, with incorporation or reduction of molecular oxygen//heme binding//iron ion binding	--	--	--	--	DOWN	-9.72127	1.33e-13	FALSE	-1.45453	0.00926086	DOWN	-11.0194	1.94e-21	DOWN	-1.83929	0.00430845	DOWN	-3.34243	3.73e-09
Cluster-6332.0	0	0	0	0	3.11	444	1344053759	XP_023910195.1	604	3e-60	benzoate 4-monooxygenase-like [Quercus suber]	--	--	--	--	--	K05280	E1.14.13.21	flavonoid 3'-monooxygenase	http://www.genome.jp/dbget-bin/www_bget?ko:K05280	P17549	501	9.9e-50	Benzoate 4-monooxygenase OS=Aspergillus niger OX=5061 GN=bphA PE=1 SV=1	PF00067	Cytochrome P450	GO:0055114	oxidation-reduction process	GO:0016705//GO:0005506//GO:0020037	oxidoreductase activity, acting on paired donors, with incorporation or reduction of molecular oxygen//iron ion binding//heme binding	--	--	--	--	FALSE	-5.13e-15	1	DOWN	-7.0462	0.00170683	DOWN	-6.96112	0.00152724	FALSE	0	1	DOWN	-6.72239	0.00398727
Cluster-11149.1885	0	0.06	0	0.49	2.79	1716	747070299	XP_011081964.1	2172	1.7e-241	premnaspirodiene oxygenase-like [Sesamum indicum]	XM_011083662.2	XM_011083662	877	0	PREDICTED: Sesamum indicum premnaspirodiene oxygenase-like (LOC105164859), mRNA	-	-	-	http://www.genome.jp/dbget-bin/www_bget?ko:-	A6YIH8	1455	9.1e-160	Premnaspirodiene oxygenase OS=Hyoscyamus muticus OX=35626 GN=CYP71D55 PE=1 SV=1	PF00067	Cytochrome P450	GO:0055114	oxidation-reduction process	GO:0005506//GO:0020037//GO:0016705	iron ion binding//heme binding//oxidoreductase activity, acting on paired donors, with incorporation or reduction of molecular oxygen	--	--	--	--	FALSE	-2.75538	0.0323235	DOWN	-2.89655	3.28e-06	DOWN	-5.74769	1.49e-12	DOWN	-6.80044	0.00407161	DOWN	-9.4732	1.38e-12
Cluster-11149.46859	0	0	0	2.11	1.07	410	848900860	XP_012850606.1	220	9.2e-16	PREDICTED: cytochrome P450 CYP72A219-like [Erythranthe guttata]	XM_012995086.1	XM_012995086	97	5.36e-41	PREDICTED: Erythranthe guttatus cytochrome P450 CYP72A219-like (LOC105970275), mRNA	-	-	-	http://www.genome.jp/dbget-bin/www_bget?ko:-	H2DH21	167	4.9e-11	Cytochrome P450 CYP72A219 OS=Panax ginseng OX=4054 PE=2 SV=1	--	--	--	--	--	--	--	--	--	--	FALSE	-5.89846	0.101362	FALSE	0.562967	1	FALSE	-5.18243	0.273386	FALSE	-5.72746	0.093697	FALSE	-4.9488	0.278772
Cluster-11149.48842	0	0	0	0.84	2.45	656	747100142	XP_011098148.1	693	2.1e-70	cytochrome P450 CYP72A219-like [Sesamum indicum]	AP019297.1	AP019297	37	2e-07	Prunus dulcis DNA, pseudomolecule Pd01	-	-	-	http://www.genome.jp/dbget-bin/www_bget?ko:-	H2DH21	400	7.5e-38	Cytochrome P450 CYP72A219 OS=Panax ginseng OX=4054 PE=2 SV=1	--	--	--	--	--	--	--	--	--	--	FALSE	-5.89846	0.101362	FALSE	-1.92928	0.0557228	DOWN	-7.67279	2.56e-05	FALSE	-5.72746	0.093697	DOWN	-7.43324	8.96e-05
Cluster-11149.48363	0	0.21	0	1.31	6.12	737	1279092669	XP_022848653.1	330	2.9e-28	cytochrome P450 CYP72A219-like isoform X3 [Olea europaea var. sylvestris]	--	--	--	--	--	-	-	-	http://www.genome.jp/dbget-bin/www_bget?ko:-	H2DH21	287	1.1e-24	Cytochrome P450 CYP72A219 OS=Panax ginseng OX=4054 PE=2 SV=1	--	--	--	--	--	--	--	--	--	--	FALSE	-2.36703	0.130046	DOWN	-2.61501	6.11e-05	DOWN	-5.08002	2.1e-09	FALSE	-6.62159	0.00968287	DOWN	-9.01284	2.1e-10
Cluster-11149.41289	0	0.1	0	0.86	0.48	696	1173787871	XP_020548657.1	147	4.5e-07	cytochrome P450 734A1 isoform X3 [Sesamum indicum]	XM_020692998.1	XM_020692998	68	1.24e-24	PREDICTED: Sesamum indicum cytochrome P450 734A1 (LOC105159229), transcript variant X3, mRNA	-	-	-	http://www.genome.jp/dbget-bin/www_bget?ko:-	--	--	--	--	--	--	--	--	--	--	--	--	--	--	FALSE	-2.77249	0.205855	FALSE	0.41566	1	FALSE	-2.44088	0.431376	FALSE	-5.89436	0.093697	FALSE	-5.26135	0.169928
Cluster-2459.0	0	0	0	0	2.3	625	1129176044	OLP84653.1	295	2.8e-24	Cytochrome P450 704C1 [Symbiodinium microadriaticum]	--	--	--	--	--	-	-	-	http://www.genome.jp/dbget-bin/www_bget?ko:-	--	--	--	--	--	--	--	--	--	--	--	--	--	--	FALSE	-5.13e-15	1	DOWN	-7.5575	0.000151788	DOWN	-7.47222	8.15e-05	FALSE	0	1	DOWN	-7.23286	0.000301576
Cluster-11149.47357	0	0	0	4.36	31.95	335	1276245580	PIN05630.1	181	2.5e-11	Cytochrome P450 CYP2 subfamily [Handroanthus impetiginosus]	--	--	--	--	--	--	--	--	--	--	--	--	--	--	--	--	--	--	--	--	--	--	--	FALSE	-6.0657	0.0663758	DOWN	-3.258	3.09e-06	DOWN	-9.16835	4.71e-11	FALSE	-5.89436	0.093697	DOWN	-8.92797	5.46e-10
Cluster-11149.2024	0	0	0	3.06	19.06	345	1276235241	PIM98733.1	194	8e-13	Cytochrome P450 CYP2 subfamily [Handroanthus impetiginosus]	--	--	--	--	--	--	--	--	--	--	--	--	--	--	--	--	--	--	--	--	--	--	--	FALSE	-5.70927	0.101362	DOWN	-3.01791	6.82e-05	DOWN	-8.5722	1.92e-08	FALSE	-5.5387	0.148189	DOWN	-8.33206	1.69e-07
[truncated: 13 more columns]

## Sheet: CYP72
The putative CYP450 candidate genes from CYP72 family.
gene_id	Fpkm(HFL)	Fpkm(BJL)	Fpkm(J9L)	Fpkm(J9R)	Fpkm(J9AR)	Gene Length	NR GI	NR ID	NR Score	NR Evalue	NR Description	NT GI	NT ID	NT Score	NT Evalue	NT Description	KO ID	KO Name	KO Description	Http Link	Swissprot ID	Swissprot Score	Swissprot Evalue	Swissprot Description	PFAM ID	PFAM description	Gene Ontology Biological Pathway	BP Description	Gene Ontology Molecular Function	MF Description	Gene Ontology Cellular Component	CC Description	KOG ID	KOG Description	UP_DOWN_REGULATION(BJ_LvsJ9_R)	log2FC(BJ_LvsJ9_R)	q value(BJ_LvsJ9_R)	UP_DOWN_REGULATION(J9_RvsJ9_X)	log2FC(J9_RvsJ9_X)	q value(J9_RvsJ9_X)	UP_DOWN_REGULATION(BJ_LvsJ9_X)	log2FC(BJ_LvsJ9_X)	q value(BJ_LvsJ9_X)	UP_DOWN_REGULATION(HF_LvsJ9_R)	log2FC(HF_LvsJ9_R)	q value(HF_LvsJ9_R)	UP_DOWN_REGULATION(HF_LvsJ9_X)	log2FC(HF_LvsJ9_X)	q value(HF_LvsJ9_X)
Cluster-11149.22060	94.44	108.07	291.59	132.81	10.4	1805	1276240750	PIN02149.1	1721	3.6e-189	Cytochrome P450 CYP4/CYP19/CYP26 subfamily [Handroanthus impetiginosus]	CP046694.1	CP046694	37	5.69e-07	Solanum tuberosum cultivar MSH/14-112 chromosome 10	-	-	-	http://www.genome.jp/dbget-bin/www_bget?ko:-	H2DH21	1181	5.7e-128	Cytochrome P450 CYP72A219 OS=Panax ginseng OX=4054 PE=2 SV=1	PF07225//PF00067	NADH-ubiquinone oxidoreductase B15 subunit (NDUFB4)//Cytochrome P450	GO:0006744//GO:0055114//GO:0006120//GO:0006814	ubiquinone biosynthetic process//oxidation-reduction process//mitochondrial electron transport, NADH to ubiquinone//sodium ion transport	GO:0008137//GO:0020037//GO:0016705//GO:0005506	NADH dehydrogenase (ubiquinone) activity//heme binding//oxidoreductase activity, acting on paired donors, with incorporation or reduction of molecular oxygen//iron ion binding	GO:0005739	mitochondrion	--	--	FALSE	-0.09492	1	UP	3.27734	2.05e-11	UP	3.07162	1.17e-10	FALSE	0.182308	0.962475	UP	3.40955	1.58e-12
Cluster-11149.30462	102.72	24.55	268.69	28.06	3.89	2802	1276240750	PIN02149.1	691	1.5e-69	Cytochrome P450 CYP4/CYP19/CYP26 subfamily [Handroanthus impetiginosus]	XM_007133159.1	XM_007133159	47	2.45e-12	Phaseolus vulgaris hypothetical protein (PHAVU_011G161600g) mRNA, complete cds	-	-	-	http://www.genome.jp/dbget-bin/www_bget?ko:-	H1A981	457	7.9e-44	11-oxo-beta-amyrin 30-oxidase OS=Medicago truncatula OX=3880 GN=CYP72A63 PE=1 SV=1	PF00067	Cytochrome P450	GO:0055114	oxidation-reduction process	GO:0016705//GO:0020037//GO:0005506	oxidoreductase activity, acting on paired donors, with incorporation or reduction of molecular oxygen//heme binding//iron ion binding	--	--	--	--	FALSE	0.00815915	1	UP	2.45353	5.79e-07	UP	2.35088	8.73e-07	UP	2.54792	1.04e-07	UP	4.95128	3.78e-22
Cluster-11149.20093	74.95	28.66	220.14	23.46	0.91	722	747087125	XP_011091093.1	811	4.8e-84	secologanin synthase-like [Sesamum indicum]	XM_011092791.2	XM_011092791	250	8.68e-126	PREDICTED: Sesamum indicum secologanin synthase-like (LOC105171626), mRNA	-	-	-	http://www.genome.jp/dbget-bin/www_bget?ko:-	Q9LUC9	559	3e-56	Cytochrome P450 72A11 OS=Arabidopsis thaliana OX=3702 GN=CYP72A11 PE=2 SV=1	PF00067	Cytochrome P450	GO:0055114	oxidation-reduction process	GO:0005506//GO:0020037//GO:0016705	iron ion binding//heme binding//oxidoreductase activity, acting on paired donors, with incorporation or reduction of molecular oxygen	--	--	--	--	FALSE	0.502569	0.566119	UP	4.2668	1.32e-11	UP	4.65773	3.53e-14	UP	2.34069	2.07e-06	UP	6.55372	5.3e-26
Cluster-11149.9949	68.94	13.44	104.62	0.91	0.04	1226	1276242211	PIN03182.1	1000	9.8e-106	Cytochrome P450 CYP4/CYP19/CYP26 subfamily [Handroanthus impetiginosus]	--	--	--	--	--	-	-	-	http://www.genome.jp/dbget-bin/www_bget?ko:-	H2DH21	649	1.9e-66	Cytochrome P450 CYP72A219 OS=Panax ginseng OX=4054 PE=2 SV=1	PF00067	Cytochrome P450	GO:0055114	oxidation-reduction process	GO:0020037//GO:0005506//GO:0016705	heme binding//iron ion binding//oxidoreductase activity, acting on paired donors, with incorporation or reduction of molecular oxygen	--	--	--	--	UP	4.08197	1.02e-12	UP	3.83117	0.00305279	UP	7.7935	1.15e-19	UP	6.90541	2.97e-31	UP	10.6524	2.08e-38
Cluster-11149.21242	28.8	9.07	63.26	6.04	0.37	3042	1276244781	PIN05054.1	707	2.3e-71	Cytochrome P450 CYP4/CYP19/CYP26 subfamily [Handroanthus impetiginosus]	XM_011092791.2	XM_011092791	139	1.92e-63	PREDICTED: Sesamum indicum secologanin synthase-like (LOC105171626), mRNA	-	-	-	http://www.genome.jp/dbget-bin/www_bget?ko:-	Q05047	389	6.6e-36	Secologanin synthase OS=Catharanthus roseus OX=4058 GN=CYP72A1 PE=1 SV=1	PF00067	Cytochrome P450	GO:0055114	oxidation-reduction process	GO:0016705//GO:0020037//GO:0005506	oxidoreductase activity, acting on paired donors, with incorporation or reduction of molecular oxygen//heme binding//iron ion binding	--	--	--	--	FALSE	0.787373	0.224546	UP	3.62825	8.91e-11	UP	4.30448	4.33e-15	UP	2.92988	1.65e-09	UP	6.50656	3.17e-29
Cluster-11149.27379	11.76	16.69	30.65	12.82	12.69	957	604320862	EYU31636.1	791	1.3e-81	hypothetical protein MIMGU_mgv1a004595mg [Erythranthe guttata]	XM_023911701.1	XM_023911701	74	8.02e-28	PREDICTED: Lactuca sativa cytochrome P450 CYP72A219-like (LOC111916052), mRNA	-	-	-	http://www.genome.jp/dbget-bin/www_bget?ko:-	H2DH21	685	9.8e-71	Cytochrome P450 CYP72A219 OS=Panax ginseng OX=4054 PE=2 SV=1	PF00067	Cytochrome P450	GO:0055114	oxidation-reduction process	GO:0020037//GO:0005506//GO:0016705	heme binding//iron ion binding//oxidoreductase activity, acting on paired donors, with incorporation or reduction of molecular oxygen	--	--	--	--	FALSE	0.588655	0.445033	FALSE	-0.383673	0.70386	FALSE	0.0942306	1	FALSE	0.544822	0.507827	FALSE	0.111172	1
Cluster-11149.17007	5.55	5.55	18.66	2.69	1.5	2489	1276242211	PIN03182.1	330	9.8e-28	Cytochrome P450 CYP4/CYP19/CYP26 subfamily [Handroanthus impetiginosus]	--	--	--	--	--	-	-	-	http://www.genome.jp/dbget-bin/www_bget?ko:-	Q05047	233	6.6e-18	Secologanin synthase OS=Catharanthus roseus OX=4058 GN=CYP72A1 PE=1 SV=1	PF04831	Popeye protein conserved region	--	--	--	--	GO:0016020	membrane	--	--	FALSE	1.2428	0.0305436	FALSE	0.449293	0.647473	UP	1.58123	0.00250075	UP	1.71761	0.00114015	UP	2.1166	3.4e-05
Cluster-11149.33593	8.01	16.7	11.91	2.97	2.73	2534	848887022	XP_012843752.1	2503	1.1e-279	PREDICTED: cytochrome P450 86A8-like [Erythranthe guttata]	XM_011094280.2	XM_011094280	925	0	PREDICTED: Sesamum indicum cytochrome P450 86A8-like (LOC105172724), mRNA	K15398	CYP86A4S	fatty acid omega-hydroxylase	http://www.genome.jp/dbget-bin/www_bget?ko:K15398	O80823	2237	2.8e-250	Cytochrome P450 86A8 OS=Arabidopsis thaliana OX=3702 GN=CYP86A8 PE=2 SV=1	PF00067	Cytochrome P450	GO:0055114	oxidation-reduction process	GO:0016705//GO:0005506//GO:0020037	oxidoreductase activity, acting on paired donors, with incorporation or reduction of molecular oxygen//iron ion binding//heme binding	--	--	--	--	UP	2.69018	5.74e-08	FALSE	-0.273419	0.838017	UP	2.30589	2.11e-06	UP	2.10553	3.34e-05	UP	1.782	0.000384106
Cluster-11149.18283	4.13	4.29	4.17	1.62	0.47	2520	747047575	XP_011069763.1	839	9.4e-87	isoflavone 2'-hydroxylase-like [Sesamum indicum]	XM_021835945.1	XM_021835945	68	4.67e-24	PREDICTED: Hevea brasiliensis cytochrome P450 81E8-like (LOC110672985), mRNA	-	-	-	http://www.genome.jp/dbget-bin/www_bget?ko:-	W8JMU7	674	4.9e-69	Cytochrome P450 81Q32 OS=Catharanthus roseus OX=4058 GN=CYP81Q32 PE=2 SV=1	PF00067	Cytochrome P450	GO:0055114	oxidation-reduction process	GO:0016705//GO:0005506//GO:0020037	oxidoreductase activity, acting on paired donors, with incorporation or reduction of molecular oxygen//iron ion binding//heme binding	--	--	--	--	UP	1.60735	0.00398713	FALSE	1.37067	0.0520424	UP	2.86689	2.31e-07	UP	2.02883	0.000146107	UP	3.34824	1.68e-09
Cluster-11149.8307	0.27	0.26	4.09	1.3	0.53	412	848900832	XP_012850591.1	207	3e-14	PREDICTED: cytochrome P450 CYP72A219-like [Erythranthe guttata]	--	--	--	--	--	-	-	-	http://www.genome.jp/dbget-bin/www_bget?ko:-	Q2MJ19	179	2e-12	Cytochrome P450 72A68 OS=Medicago truncatula OX=3880 GN=CYP72A68 PE=1 SV=1	PF00067	Cytochrome P450	GO:0055114	oxidation-reduction process	GO:0005506//GO:0020037//GO:0016705	iron ion binding//heme binding//oxidoreductase activity, acting on paired donors, with incorporation or reduction of molecular oxygen	--	--	--	--	FALSE	-1.94162	0.565463	FALSE	0.863027	0.966504	FALSE	-1.16611	1	FALSE	-1.55399	0.745764	FALSE	-0.7303	1
Cluster-11149.37113	0.93	0.39	3.53	0.19	0.05	1161	747087125	XP_011091093.1	201	4.2e-13	secologanin synthase-like [Sesamum indicum]	XM_011092791.2	XM_011092791	83	9.71e-33	PREDICTED: Sesamum indicum secologanin synthase-like (LOC105171626), mRNA	-	-	-	http://www.genome.jp/dbget-bin/www_bget?ko:-	Q9LUC6	135	7.1e-07	Cytochrome P450 72A14 OS=Arabidopsis thaliana OX=3702 GN=CYP72A14 PE=2 SV=1	PF00067	Cytochrome P450	GO:0055114	oxidation-reduction process	GO:0005506//GO:0020037//GO:0016705	iron ion binding//heme binding//oxidoreductase activity, acting on paired donors, with incorporation or reduction of molecular oxygen	--	--	--	--	FALSE	1.23588	0.651408	FALSE	1.47981	0.70386	FALSE	2.59812	0.198031	FALSE	2.95366	0.00623577	UP	4.35368	0.000933103
Cluster-11149.13406	1.77	3.98	2.27	1.29	0.95	613	1276232594	PIM97508.1	397	4.1e-36	Cytochrome P450 CYP4/CYP19/CYP26 subfamily [Handroanthus impetiginosus]	--	--	--	--	--	-	-	-	http://www.genome.jp/dbget-bin/www_bget?ko:-	Q2MJ21	256	3.5e-21	Cytochrome P450 716A67 OS=Medicago truncatula OX=3880 GN=CYP72A67 PE=2 SV=1	PF03393	Pneumovirus matrix protein	GO:0019068	virion assembly	--	--	GO:0019031	viral envelope	--	--	FALSE	1.83346	0.0341868	FALSE	0.0369179	1	FALSE	1.75855	0.0388274	FALSE	1.11333	0.332607	FALSE	1.09871	0.317297
[truncated: 13 more columns]

## Sheet: CYP76
The putative CYP450 candidate genes from CYP76 family.
gene_id	Fpkm(HFL)	Fpkm(BJL)	Fpkm(J9L)	Fpkm(J9R)	Fpkm(J9AR)	Gene Length	NR GI	NR ID	NR Score	NR Evalue	NR Description	NT GI	NT ID	NT Score	NT Evalue	NT Description	KO ID	KO Name	KO Description	Http Link	Swissprot ID	Swissprot Score	Swissprot Evalue	Swissprot Description	PFAM ID	PFAM description	Gene Ontology Biological Pathway	BP Description	Gene Ontology Molecular Function	MF Description	Gene Ontology Cellular Component	CC Description	KOG ID	KOG Description	UP_DOWN_REGULATION(BJ_LvsJ9_R)	log2FC(BJ_LvsJ9_R)	q value(BJ_LvsJ9_R)	UP_DOWN_REGULATION(J9_RvsJ9_X)	log2FC(J9_RvsJ9_X)	q value(J9_RvsJ9_X)	UP_DOWN_REGULATION(BJ_LvsJ9_X)	log2FC(BJ_LvsJ9_X)	q value(BJ_LvsJ9_X)	UP_DOWN_REGULATION(HF_LvsJ9_R)	log2FC(HF_LvsJ9_R)	q value(HF_LvsJ9_R)	UP_DOWN_REGULATION(HF_LvsJ9_X)	log2FC(HF_LvsJ9_X)	q value(HF_LvsJ9_X)
Cluster-11149.30874	138.73	97.09	668.93	1	0.78	972	747093273	XP_011094434.1	1569	8.2e-172	cytochrome P450 76A1-like [Sesamum indicum]	--	--	--	--	--	K20618	CYP76A	cytochrome P450 family 76 subfamily A	http://www.genome.jp/dbget-bin/www_bget?ko:K20618	W8JIS5	1346	2.2e-147	Iridoid oxidase OS=Catharanthus roseus OX=4058 GN=IO PE=1 SV=1	PF00067	Cytochrome P450	GO:0055114	oxidation-reduction process	GO:0005506//GO:0020037//GO:0016705	iron ion binding//heme binding//oxidoreductase activity, acting on paired donors, with incorporation or reduction of molecular oxygen	--	--	--	--	UP	6.80223	7.31e-30	FALSE	-0.0373147	1	UP	6.65286	2.72e-28	UP	7.77703	1.46e-36	UP	7.68763	5.34e-35
Cluster-11149.27919	56.97	22.88	166.75	37.18	18.8	1955	747102147	XP_011099226.1	1200	1e-128	geraniol 8-hydroxylase-like [Sesamum indicum]	XM_011100924.2	XM_011100924	426	0	PREDICTED: Sesamum indicum geraniol 8-hydroxylase-like (LOC105177688), mRNA	-	-	-	http://www.genome.jp/dbget-bin/www_bget?ko:-	Q8VWZ7	1085	8.3e-117	geraniol 8-hydroxylase OS=Catharanthus roseus OX=4058 GN=CYP76B6 PE=1 SV=1	PF00067	Cytochrome P450	GO:0055114	oxidation-reduction process	GO:0016705//GO:0005506//GO:0020037	oxidoreductase activity, acting on paired donors, with incorporation or reduction of molecular oxygen//iron ion binding//heme binding	--	--	--	--	FALSE	-0.498502	0.550344	FALSE	0.587815	0.387654	FALSE	-0.0214528	1	FALSE	1.28983	0.0136764	UP	1.82761	0.000131961
Cluster-11149.34412	5.97	6.22	33.81	0.06	0	1003	747093273	XP_011094434.1	348	3.2e-30	cytochrome P450 76A1-like [Sesamum indicum]	--	--	--	--	--	-	-	-	http://www.genome.jp/dbget-bin/www_bget?ko:-	W8JIS5	313	1.4e-27	Iridoid oxidase OS=Catharanthus roseus OX=4058 GN=IO PE=1 SV=1	PF00067	Cytochrome P450	GO:0055114	oxidation-reduction process	GO:0016705//GO:0005506//GO:0020037	oxidoreductase activity, acting on paired donors, with incorporation or reduction of molecular oxygen//iron ion binding//heme binding	--	--	--	--	UP	6.81365	2.62e-14	FALSE	2.9964	1	UP	9.60515	2.28e-13	UP	7.19491	2.95e-15	UP	9.82835	2.17e-14
Cluster-11149.29079	20.91	26.23	25.4	11.9	3.79	1771	1279029765	XP_022854208.1	2146	1.8e-238	protein LUTEIN DEFICIENT 5, chloroplastic-like [Olea europaea var. sylvestris]	XM_011078786.2	XM_011078786	1038	0	PREDICTED: Sesamum indicum protein LUTEIN DEFICIENT 5, chloroplastic (LOC105161176), mRNA	K15747	LUT5, CYP97A3	beta-ring hydroxylase	http://www.genome.jp/dbget-bin/www_bget?ko:K15747	Q93VK5	2028	3.4e-226	Protein LUTEIN DEFICIENT 5, chloroplastic OS=Arabidopsis thaliana OX=3702 GN=CYP97A3 PE=1 SV=1	PF00067	Cytochrome P450	GO:0055114	oxidation-reduction process	GO:0005506//GO:0020037//GO:0016705	iron ion binding//heme binding//oxidoreductase activity, acting on paired donors, with incorporation or reduction of molecular oxygen	--	--	KOG0157	Cytochrome P450 CYP4/CYP19/CYP26 subfamilies	FALSE	1.34217	0.0120612	FALSE	1.25343	0.0249151	UP	2.48475	3.32e-07	UP	1.48679	0.00407161	UP	2.68999	3.62e-08
Cluster-11149.41676	5.83	3	19.53	0.11	0.06	1760	747056654	XP_011074592.1	1819	1.5e-200	ferruginol synthase-like, partial [Sesamum indicum]	XM_011076290.2	XM_011076290	469	0	PREDICTED: Sesamum indicum ferruginol synthase-like (LOC105159279), partial mRNA	-	-	-	http://www.genome.jp/dbget-bin/www_bget?ko:-	W8JMV1	1441	3.9e-158	Cytochrome P450 76T24 OS=Catharanthus roseus OX=4058 GN=CYP76T24 PE=2 SV=1	PF00067	Cytochrome P450	GO:0055114	oxidation-reduction process	GO:0005506//GO:0020037//GO:0016705	iron ion binding//heme binding//oxidoreductase activity, acting on paired donors, with incorporation or reduction of molecular oxygen	--	--	--	--	UP	4.90362	4.11e-11	FALSE	0.551111	1	UP	5.33741	3.3e-10	UP	6.3253	6.92e-19	UP	6.81179	8.91e-19
Cluster-11149.20373	4.12	12.52	13.27	4.75	1.42	2282	747084049	XP_011089416.1	577	2.1e-56	licodione synthase-like [Sesamum indicum]	KF606861.1	KF606861	178	3e-85	Plectranthus barbatus voucher RRLH:22176 clone 2L flavone synthase (FNS) mRNA, complete cds	-	-	-	http://www.genome.jp/dbget-bin/www_bget?ko:-	P93149	439	7.8e-42	Licodione synthase OS=Glycyrrhiza echinata OX=46348 GN=CYP93B1 PE=1 SV=2	PF00067	Cytochrome P450	GO:0055114	oxidation-reduction process	GO:0005506//GO:0020037//GO:0016705	iron ion binding//heme binding//oxidoreductase activity, acting on paired donors, with incorporation or reduction of molecular oxygen	--	--	--	--	UP	1.59848	0.00232868	FALSE	1.3472	0.0211957	UP	2.83477	1.64e-08	FALSE	0.469625	0.599513	UP	1.76644	0.000900052
Cluster-11149.37945	25.43	8.65	10.89	6.7	1.65	1869	745790953	AJD25185.1	1725	1.3e-189	cytochrome P450 CYP76S7 [Salvia miltiorrhiza]	XM_011092786.2	XM_011092786	346	9.96e-179	PREDICTED: Sesamum indicum ferruginol synthase-like (LOC105171619), mRNA	-	-	-	http://www.genome.jp/dbget-bin/www_bget?ko:-	W8JMV1	1491	6.6e-164	Cytochrome P450 76T24 OS=Catharanthus roseus OX=4058 GN=CYP76T24 PE=2 SV=1	PF00067//PF07778	Cytochrome P450//Mis6	GO:0055114//GO:0034508	oxidation-reduction process//centromere complex assembly	GO:0016705//GO:0020037//GO:0005506	oxidoreductase activity, acting on paired donors, with incorporation or reduction of molecular oxygen//heme binding//iron ion binding	GO:0000776	kinetochore	--	--	FALSE	0.569938	0.466991	UP	1.62572	0.00398398	UP	2.08479	5.6e-05	UP	2.59791	1.19e-07	UP	4.17308	5.81e-16
[truncated: 13 more columns]
