# Supplementary material for: Transcriptome Analysis Provides Insights into Catalpol Biosynthesis in the Medicinal Plant Rehmannia glutinosa and the Functional Characterization of RgGES Genes
Source: Genes (Basel). 2024 Jan 24;15(2):155. doi: 10.3390/genes15020155 (PMC10888080; doi:10.3390/genes15020155)
Supplement: Supplementary file 1 [file genes-15-00155-s001.zip › Supplementary Table S12.xlsx]

## Sheet: Sheet1
Supplementary Table S12. Putative dehydratase genes in R. glutinosa transcriptomes. The expression level of unigenes which showed in red color macthed the content of catalpol in R. glutinosa.
gene_id	Fpkm(HFL)	Fpkm(BJL)	Fpkm(J9L)	Fpkm(J9R)	Fpkm(J9AR)	Gene Length	NR GI	NR ID	NR Score	NR Evalue	NR Description	NT GI	NT ID	NT Score	NT Evalue	NT Description	KO ID	KO Name	KO Description	Http Link	Swissprot ID	Swissprot Score	Swissprot Evalue	Swissprot Description	PFAM ID	PFAM description	Gene Ontology Biological Pathway	BP Description	Gene Ontology Molecular Function	MF Description	Gene Ontology Cellular Component	CC Description	KOG ID	KOG Description	UP_DOWN_REGULATION(BJ_LvsJ9_R)	log2FC(BJ_LvsJ9_R)	q value(BJ_LvsJ9_R)	UP_DOWN_REGULATION(J9_RvsJ9_X)	log2FC(J9_RvsJ9_X)	q value(J9_RvsJ9_X)	UP_DOWN_REGULATION(BJ_LvsJ9_X)	log2FC(BJ_LvsJ9_X)	q value(BJ_LvsJ9_X)	UP_DOWN_REGULATION(HF_LvsJ9_R)	log2FC(HF_LvsJ9_R)	q value(HF_LvsJ9_R)	UP_DOWN_REGULATION(HF_LvsJ9_X)	log2FC(HF_LvsJ9_X)	q value(HF_LvsJ9_X)
Cluster-11149.24784	392.46	261.24	1151.06	0.17	0	1223	1276239593	PIN01391.1	655	9.9e-66	putative carbonic anhydrase involved in protection against oxidative damage [Handroanthus impetiginosus]	XM_011100171.2	XM_011100171	269	4.11e-136	PREDICTED: Sesamum indicum carbonic anhydrase, chloroplastic-like (LOC105177130), mRNA	K01673	cynT, can	carbonic anhydrase	http://www.genome.jp/dbget-bin/www_bget?ko:K01673	P27140	624	1.5e-63	Beta carbonic anhydrase 1, chloroplastic OS=Arabidopsis thaliana OX=3702 GN=BCA1 PE=1 SV=2	PF00484	Carbonic anhydrase	GO:0006730//GO:0006807	one-carbon metabolic process//nitrogen compound metabolic process	GO:0008270//GO:0004089	zinc ion binding//carbonate dehydratase activity	--	--	KOG1578	Predicted carbonic anhydrase involved in protection against oxidative damage	UP	10.7109	7.87e-50	FALSE	4.85401	0.357601	UP	15.366	4.74e-50	UP	11.7583	4.54e-57	UP	16.2395	9.18e-58
Cluster-11149.24933	555.09	295.46	1176.51	0.11	0	1448	747100745	XP_011098473.1	1322	5.3e-143	carbonic anhydrase, chloroplastic-like [Sesamum indicum]	XM_011100171.2	XM_011100171	461	0	PREDICTED: Sesamum indicum carbonic anhydrase, chloroplastic-like (LOC105177130), mRNA	K01673	cynT, can	carbonic anhydrase	http://www.genome.jp/dbget-bin/www_bget?ko:K01673	P27141	1138	4.4e-123	Carbonic anhydrase, chloroplastic OS=Nicotiana tabacum OX=4097 PE=2 SV=1	PF00484	Carbonic anhydrase	GO:0006730//GO:0006807	one-carbon metabolic process//nitrogen compound metabolic process	GO:0008270//GO:0004089	zinc ion binding//carbonate dehydratase activity	--	--	KOG1578	Predicted carbonic anhydrase involved in protection against oxidative damage	UP	11.5878	3.46e-54	FALSE	4.45551	0.540202	UP	15.8436	2.16e-53	UP	12.9585	6.34e-64	UP	17.0423	1.41e-63
Cluster-11149.26284	44.65	74.19	173.38	1.04	0.72	1992	1276271521	PIN26911.1	406	1.2e-36	Pterin carbinolamine dehydratase PCBD/dimerization cofactor of HNF1 [Handroanthus impetiginosus]	XM_011078245.2	XM_011078245	124	2.73e-55	PREDICTED: Sesamum indicum putative pterin-4-alpha-carbinolamine dehydratase (LOC105160767), mRNA	-	-	-	http://www.genome.jp/dbget-bin/www_bget?ko:-	Q9LU63	260	3.9e-21	Probable pterin-4-alpha-carbinolamine dehydratase, chloroplastic OS=Arabidopsis thaliana OX=3702 GN=ATP1 PE=1 SV=1	PF01329	Pterin 4 alpha carbinolamine dehydratase	GO:0006729	tetrahydrobiopterin biosynthetic process	GO:0008124	4-alpha-hydroxytetrahydrobiopterin dehydratase activity	--	--	--	--	UP	6.35131	1.72e-29	FALSE	0.144137	1	UP	6.38412	3.69e-29	UP	6.09086	1.71e-27	UP	6.18402	1.76e-27
Cluster-11149.34878	3.71	5.19	7.48	1.77	0.69	3185	848862151	XP_012831870.1	431	2.4e-39	PREDICTED: threonine dehydratase biosynthetic, chloroplastic-like [Erythranthe guttata]	XM_020697956.1	XM_020697956	188	1.16e-90	PREDICTED: Sesamum indicum threonine dehydratase biosynthetic, chloroplastic (LOC105174150), mRNA	K01754	E4.3.1.19, ilvA, tdcB	threonine dehydratase	http://www.genome.jp/dbget-bin/www_bget?ko:K01754	A0FKE6	362	9.3e-33	Threonine dehydratase 1 biosynthetic, chloroplastic OS=Solanum lycopersicum OX=4081 GN=TD1 PE=1 SV=1	--	--	--	--	--	--	--	--	KOG1250	Threonine/serine dehydratases	UP	1.7549	0.000952198	FALSE	0.961684	0.165452	UP	2.60561	4.87e-07	UP	1.74673	0.000994915	UP	2.65781	3.8e-07
Cluster-11149.27816	16.77	26.82	30.37	3.63	3.17	1972	1276245597	PIN05638.1	1812	1.1e-199	UDP-N-acetylglucosamine 4,6-dehydratase (inverting) [Handroanthus impetiginosus]	XR_847942.2	XR_847942	647	0	PREDICTED: Sesamum indicum uncharacterized LOC105163644 (LOC105163644), transcript variant X4, misc_RNA	-	-	-	http://www.genome.jp/dbget-bin/www_bget?ko:-	--	--	--	--	PF01118//PF01370//PF01073//PF03435//PF01113//PF00056//PF16045//PF00185	Semialdehyde dehydrogenase, NAD binding domain//NAD dependent epimerase/dehydratase family//3-beta hydroxysteroid dehydrogenase/isomerase family//Saccharopine dehydrogenase NADP binding domain//Dihydrodipicolinate reductase, N-terminus//lactate/malate dehydrogenase, NAD binding domain//LisH//Aspartate/ornithine carbamoyltransferase, Asp/Orn binding domain	GO:0008209//GO:0006520//GO:0055114//GO:0008207//GO:0009089//GO:0006694//GO:0008210//GO:0009085	androgen metabolic process//cellular amino acid metabolic process//oxidation-reduction process//C21-steroid hormone metabolic process//lysine biosynthetic process via diaminopimelate//steroid biosynthetic process//estrogen metabolic process//lysine biosynthetic process	GO:0005515//GO:0050662//GO:0016620//GO:0051287//GO:0016743//GO:0003824//GO:0008839//GO:0016616//GO:0016597//GO:0016491//GO:0003854	protein binding//obsolete coenzyme binding//oxidoreductase activity, acting on the aldehyde or oxo group of donors, NAD or NADP as acceptor//NAD binding//carboxyl- or carbamoyltransferase activity//catalytic activity//4-hydroxy-tetrahydrodipicolinate reductase//oxidoreductase activity, acting on the CH-OH group of donors, NAD or NADP as acceptor//amino acid binding//oxidoreductase activity//3-bet…	--	--	--	--	UP	3.08808	4.92e-10	FALSE	-0.203696	0.940531	UP	2.77349	1.19e-08	UP	2.88318	6.39e-09	UP	2.62931	8.44e-08
Cluster-11149.31707	13.76	13.85	11.16	4.58	1.59	1146	1276248883	PIN08139.1	1158	4.4e-124	Hydroxyethylthiazole kinase [Handroanthus impetiginosus]	XM_012974211.1	XM_012974211	298	2.91e-152	PREDICTED: Erythranthe guttatus hydroxyethylthiazole kinase (LOC105950843), mRNA	K00878	thiM	hydroxyethylthiazole kinase	http://www.genome.jp/dbget-bin/www_bget?ko:K00878	Q9LIQ4	895	5.2e-95	Hydroxyethylthiazole kinase OS=Arabidopsis thaliana OX=3702 GN=THIM PE=1 SV=1	PF02110//PF01256	Hydroxyethylthiazole kinase family//Carbohydrate kinase	GO:0009228//GO:0006772	thiamine biosynthetic process//thiamine metabolic process	GO:0052855//GO:0004417	ADP-dependent NAD(P)H-hydrate dehydratase activity//hydroxyethylthiazole kinase activity	--	--	--	--	UP	1.8021	0.00080507	FALSE	1.12834	0.114793	UP	2.81939	1.56e-07	UP	2.25747	1.25e-05	UP	3.33488	4.58e-10
Cluster-11149.27043	18.65	36.44	42.4	15.28	6.85	1532	1276249929	PIN08949.1	1895	2e-209	Threonine/serine dehydratase [Handroanthus impetiginosus]	XM_020691353.1	XM_020691353	775	0	PREDICTED: Sesamum indicum threonine dehydratase biosynthetic, chloroplastic-like (LOC105179515), transcript variant X2, mRNA	K01754	E4.3.1.19, ilvA, tdcB	threonine dehydratase	http://www.genome.jp/dbget-bin/www_bget?ko:K01754	A0FKE6	1782	9.8e-198	Threonine dehydratase 1 biosynthetic, chloroplastic OS=Solanum lycopersicum OX=4081 GN=TD1 PE=1 SV=1	PF06936	Selenoprotein S (SelS)	GO:0006886	intracellular protein transport	--	--	GO:0030176	integral component of endoplasmic reticulum membrane	KOG1250	Threonine/serine dehydratases	FALSE	1.45687	0.00540797	FALSE	0.760598	0.242663	UP	2.10665	1.27e-05	FALSE	0.960751	0.0970959	UP	1.67123	0.000767983
Cluster-11149.24522	83.06	135.6	134.68	62.54	24.09	2013	1276251721	PIN10332.1	1892	6e-209	dTDP-glucose 4-6-dehydratase/UDP-glucuronic acid decarboxylase [Handroanthus impetiginosus]	XM_011075172.2	XM_011075172	769	0	PREDICTED: Sesamum indicum GDP-mannose 3,5-epimerase 2 (LOC105158417), mRNA	K10046	GME	GDP-D-mannose 3', 5'-epimerase [EC:5.1.3.18 5.1.3.-]	http://www.genome.jp/dbget-bin/www_bget?ko:K10046	Q2R1V8	1842	1.4e-204	GDP-mannose 3,5-epimerase 2 OS=Oryza sativa subsp. japonica OX=39947 GN=GME-2 PE=2 SV=2	PF01073//PF01370	3-beta hydroxysteroid dehydrogenase/isomerase family//NAD dependent epimerase/dehydratase family	GO:0055114//GO:0008207//GO:0006694//GO:0008210//GO:0008209	oxidation-reduction process//C21-steroid hormone metabolic process//steroid biosynthetic process//estrogen metabolic process//androgen metabolic process	GO:0003854//GO:0003824//GO:0016616//GO:0050662	3-beta-hydroxy-delta5-steroid dehydrogenase activity//catalytic activity//oxidoreductase activity, acting on the CH-OH group of donors, NAD or NADP as acceptor//obsolete coenzyme binding	--	--	KOG1429	dTDP-glucose 4-6-dehydratase/UDP-glucuronic acid decarboxylase	FALSE	1.31837	0.0120236	FALSE	0.98012	0.0810008	UP	2.1877	3.09e-06	FALSE	1.08379	0.0474184	UP	2.01388	2.05e-05
Cluster-11149.26024	76.48	81.98	86.07	22.88	15.93	2830	1276251573	PIN10222.1	1179	4e-126	Delta-aminolevulinic acid dehydratase [Handroanthus impetiginosus]	XM_011071221.2	XM_011071221	518	0	PREDICTED: Sesamum indicum delta-aminolevulinic acid dehydratase, chloroplastic-like (LOC105155358), mRNA	K01698	hemB, ALAD	porphobilinogen synthase	http://www.genome.jp/dbget-bin/www_bget?ko:K01698	Q9SFH9	948	9.2e-101	Delta-aminolevulinic acid dehydratase 1, chloroplastic OS=Arabidopsis thaliana OX=3702 GN=HEMB1 PE=2 SV=1	PF09427//PF00490//PF08095	Domain of unknown function (DUF2014)//Delta-aminolevulinic acid dehydratase//Hefutoxin family	GO:0015994//GO:0033014//GO:0009405//GO:0045944//GO:0032933	chlorophyll metabolic process//tetrapyrrole biosynthetic process//pathogenesis//positive regulation of transcription by RNA polymerase II//SREBP signaling pathway	GO:0046872//GO:0004655	metal ion binding//porphobilinogen synthase activity	GO:0005576	extracellular region	KOG2794	Delta-aminolevulinic acid dehydratase	UP	2.04136	2.77e-05	FALSE	0.126713	1	UP	2.05728	1.21e-05	UP	2.41621	4.84e-07	UP	2.49289	1.23e-07
Cluster-11149.24070	19.9	30.96	29.77	11.12	5.81	2055	747078075	XP_011086190.1	1517	1.9e-165	arogenate dehydratase/prephenate dehydratase 1, chloroplastic [Sesamum indicum]	XM_020696326.1	XM_020696326	653	0	PREDICTED: Sesamum indicum arogenate dehydratase/prephenate dehydratase 1, chloroplastic (LOC105167990), transcript variant X2, mRNA	-	-	-	http://www.genome.jp/dbget-bin/www_bget?ko:-	Q9SA96	1077	7.4e-116	Arogenate dehydratase/prephenate dehydratase 1, chloroplastic OS=Arabidopsis thaliana OX=3702 GN=ADT1 PE=1 SV=1	PF00800	Prephenate dehydratase	GO:0006571//GO:0009094//GO:0000162	tyrosine biosynthetic process//L-phenylalanine biosynthetic process//tryptophan biosynthetic process	GO:0004664	prephenate dehydratase activity	--	--	KOG2797	Prephenate dehydratase	UP	1.67861	0.00094167	FALSE	0.539235	0.480968	UP	2.10703	1.14e-05	UP	1.51402	0.00323998	UP	2.00316	3.61e-05
Cluster-11149.34244	4.03	5.31	7.31	3.7	1.69	1244	1562639814	RXH80239.1	349	3.1e-30	hypothetical protein DVH24_041386 [Malus domestica]	XM_012976507.1	XM_012976507	124	1.68e-55	PREDICTED: Erythranthe guttatus UDP-glucuronic acid decarboxylase 1 (LOC105952913), mRNA	K08678	UXS1, uxs	UDP-glucuronate decarboxylase	http://www.genome.jp/dbget-bin/www_bget?ko:K08678	Q8VZC0	323	1.2e-28	UDP-glucuronic acid decarboxylase 1 OS=Arabidopsis thaliana OX=3702 GN=UXS1 PE=1 SV=1	PF01370//PF07127	NAD dependent epimerase/dehydratase family//Late nodulin protein	GO:0009878	nodule morphogenesis	GO:0003824//GO:0050662//GO:0046872	catalytic activity//obsolete coenzyme binding//metal ion binding	--	--	KOG1429	dTDP-glucose 4-6-dehydratase/UDP-glucuronic acid decarboxylase	FALSE	0.726962	0.356715	FALSE	0.731693	0.401501	FALSE	1.34779	0.0210321	FALSE	0.794906	0.26999	FALSE	1.47607	0.0129647
Cluster-11149.10828	16.76	13.46	21.29	15.26	5.28	667	747093942	XP_011094795.1	671	7.6e-68	UDP-glucuronic acid decarboxylase 1 [Sesamum indicum]	XM_011096493.2	XM_011096493	254	4.77e-128	PREDICTED: Sesamum indicum UDP-glucuronic acid decarboxylase 1 (LOC105174398), mRNA	K08678	UXS1, uxs	UDP-glucuronate decarboxylase	http://www.genome.jp/dbget-bin/www_bget?ko:K08678	Q8VZC0	513	6e-51	UDP-glucuronic acid decarboxylase 1 OS=Arabidopsis thaliana OX=3702 GN=UXS1 PE=1 SV=1	PF01073//PF01370	3-beta hydroxysteroid dehydrogenase/isomerase family//NAD dependent epimerase/dehydratase family	GO:0008207//GO:0055114//GO:0008209//GO:0008210//GO:0006694	C21-steroid hormone metabolic process//oxidation-reduction process//androgen metabolic process//estrogen metabolic process//steroid biosynthetic process	GO:0016616//GO:0003824//GO:0003854//GO:0050662	oxidoreductase activity, acting on the CH-OH group of donors, NAD or NADP as acceptor//catalytic activity//3-beta-hydroxy-delta5-steroid dehydrogenase activity//obsolete coenzyme binding	--	--	KOG1429	dTDP-glucose 4-6-dehydratase/UDP-glucuronic acid decarboxylase	FALSE	0.0350598	1	FALSE	1.13011	0.0828464	FALSE	1.05439	0.0749111	FALSE	0.798565	0.236831	UP	1.87818	0.000513143
Cluster-11149.37591	5.98	5.3	8.37	7.84	2.5	526	1600650898	TEY34060.1	547	1.4e-53	UDP-glucuronate decarboxylase [Salvia splendens]	XM_011096493.2	XM_011096493	276	2.18e-140	PREDICTED: Sesamum indicum UDP-glucuronic acid decarboxylase 1 (LOC105174398), mRNA	K08678	UXS1, uxs	UDP-glucuronate decarboxylase	http://www.genome.jp/dbget-bin/www_bget?ko:K08678	Q8VZC0	518	1.2e-51	UDP-glucuronic acid decarboxylase 1 OS=Arabidopsis thaliana OX=3702 GN=UXS1 PE=1 SV=1	--	--	--	--	--	--	--	--	KOG1429	dTDP-glucose 4-6-dehydratase/UDP-glucuronic acid decarboxylase	FALSE	-0.336118	0.877088	FALSE	1.24077	0.144338	FALSE	0.794081	0.400099	FALSE	0.265965	0.958261	FALSE	1.45536	0.0553355
Cluster-11149.23603	116.27	135.33	173.13	161.42	53.29	1490	1276238980	PIN00981.1	1578	1.1e-172	dTDP-glucose 4-6-dehydratase/UDP-glucuronic acid decarboxylase [Handroanthus impetiginosus]	XM_011090520.2	XM_011090520	698	0	PREDICTED: Sesamum indicum UDP-D-apiose/UDP-D-xylose synthase 2 (LOC105169967), mRNA	-	-	-	http://www.genome.jp/dbget-bin/www_bget?ko:-	Q9SGE0	1519	3e-167	UDP-D-apiose/UDP-D-xylose synthase 2 OS=Arabidopsis thaliana OX=3702 GN=AXS2 PE=2 SV=1	PF01073//PF01370//PF03721//PF03435	3-beta hydroxysteroid dehydrogenase/isomerase family//NAD dependent epimerase/dehydratase family//UDP-glucose/GDP-mannose dehydrogenase family, NAD binding domain//Saccharopine dehydrogenase NADP binding domain	GO:0008209//GO:0006694//GO:0008210//GO:0008207//GO:0055114	androgen metabolic process//steroid biosynthetic process//estrogen metabolic process//C21-steroid hormone metabolic process//oxidation-reduction process	GO:0050662//GO:0003824//GO:0016616//GO:0051287//GO:0016491//GO:0003854	obsolete coenzyme binding//catalytic activity//oxidoreductase activity, acting on the CH-OH group of donors, NAD or NADP as acceptor//NAD binding//oxidoreductase activity//3-beta-hydroxy-delta5-steroid dehydrogenase activity	--	--	KOG1429	dTDP-glucose 4-6-dehydratase/UDP-glucuronic acid decarboxylase	FALSE	-0.0506216	1	FALSE	1.20197	0.0234343	FALSE	1.04056	0.0376684	FALSE	0.199714	0.936045	FALSE	1.35166	0.00575434
Cluster-11149.23806	65.22	125.82	105.03	77.79	35.24	3037	920714996	KOM55084.1	1014	5.8e-107	hypothetical protein LR48_Vigan10g097600 [Vigna angularis]	XM_011092781.2	XM_011092781	369	0	PREDICTED: Sesamum indicum GDP-mannose 3,5-epimerase 2-like (LOC105171617), mRNA	K10046	GME	GDP-D-mannose 3', 5'-epimerase [EC:5.1.3.18 5.1.3.-]	http://www.genome.jp/dbget-bin/www_bget?ko:K10046	Q2R1V8	960	4e-102	GDP-mannose 3,5-epimerase 2 OS=Oryza sativa subsp. japonica OX=39947 GN=GME-2 PE=2 SV=2	PF06221//PF01370//PF01073	Putative zinc finger motif, C2HC5-type//NAD dependent epimerase/dehydratase family//3-beta hydroxysteroid dehydrogenase/isomerase family	GO:0006694//GO:0008210//GO:0008209//GO:0006355//GO:0055114//GO:0008207	steroid biosynthetic process//estrogen metabolic process//androgen metabolic process//regulation of transcription, DNA-templated//oxidation-reduction process//C21-steroid hormone metabolic process	GO:0008270//GO:0050662//GO:0003854//GO:0016616//GO:0003824	zinc ion binding//obsolete coenzyme binding//3-beta-hydroxy-delta5-steroid dehydrogenase activity//oxidoreductase activity, acting on the CH-OH group of donors, NAD or NADP as acceptor//catalytic activity	GO:0005634	nucleus	KOG1429	dTDP-glucose 4-6-dehydratase/UDP-glucuronic acid decarboxylase	FALSE	0.893893	0.132147	FALSE	0.746575	0.226552	UP	1.52968	0.00137662	FALSE	0.421546	0.62591	FALSE	1.1181	0.0246955
Cluster-11149.33050	27.43	52.82	34.28	21.91	12.9	919	1276252528	PIN10961.1	1027	5.4e-109	hypothetical protein CDL12_16451 [Handroanthus impetiginosus]	XM_011090807.2	XM_011090807	412	0	PREDICTED: Sesamum indicum uncharacterized LOC105170167 (LOC105170167), mRNA	-	-	-	http://www.genome.jp/dbget-bin/www_bget?ko:-	--	--	--	--	PF01329	Pterin 4 alpha carbinolamine dehydratase	GO:0006729	tetrahydrobiopterin biosynthetic process	GO:0008124	4-alpha-hydroxytetrahydrobiopterin dehydratase activity	--	--	--	--	UP	1.47817	0.00490562	FALSE	0.365951	0.707396	UP	1.73331	0.000400162	FALSE	0.99253	0.092831	FALSE	1.30839	0.0107452
Cluster-11149.37411	7.26	11.9	20.17	8.15	7.81	720	848862356	XP_012831961.1	545	3.3e-53	PREDICTED: UDP-glucuronic acid decarboxylase 1 [Erythranthe guttata]	XM_011096493.2	XM_011096493	291	1.4e-148	PREDICTED: Sesamum indicum UDP-glucuronic acid decarboxylase 1 (LOC105174398), mRNA	K08678	UXS1, uxs	UDP-glucuronate decarboxylase	http://www.genome.jp/dbget-bin/www_bget?ko:K08678	Q8VZC0	521	7.7e-52	UDP-glucuronic acid decarboxylase 1 OS=Arabidopsis thaliana OX=3702 GN=UXS1 PE=1 SV=1	--	--	--	--	--	--	--	--	KOG1429	dTDP-glucose 4-6-dehydratase/UDP-glucuronic acid decarboxylase	FALSE	0.759313	0.313382	FALSE	-0.336749	0.796404	FALSE	0.311821	0.722693	FALSE	0.498261	0.629273	FALSE	0.111576	1
Cluster-11149.30555	12.61	19.34	28.83	16.7	12.59	2670	1276256716	PIN14374.1	2347	1.4e-261	Pentafunctional AROM protein [Handroanthus impetiginosus]	XM_011073193.2	XM_011073193	994	0	PREDICTED: Sesamum indicum bifunctional 3-dehydroquinate dehydratase/shikimate dehydrogenase, chloroplastic (LOC105156928), transcript variant X2, mRNA	K13832	aroDE, DHQ-SDH	3-dehydroquinate dehydratase / shikimate dehydrogenase [EC:4.2.1.10 1.1.1.25]	http://www.genome.jp/dbget-bin/www_bget?ko:K13832	Q9SQT8	1759	7.9e-195	Bifunctional 3-dehydroquinate dehydratase/shikimate dehydrogenase, chloroplastic OS=Arabidopsis thaliana OX=3702 GN=EMB3004 PE=1 SV=1	PF08501//PF02826//PF03446//PF07992//PF01487//PF03435	Shikimate dehydrogenase substrate binding domain//D-isomer specific 2-hydroxyacid dehydrogenase, NAD binding domain//NAD binding domain of 6-phosphogluconate dehydrogenase//Pyridine nucleotide-disulphide oxidoreductase//Type I 3-dehydroquinase//Saccharopine dehydrogenase NADP binding domain	GO:0055114//GO:0006571//GO:0000162//GO:0009094	oxidation-reduction process//tyrosine biosynthetic process//tryptophan biosynthetic process//L-phenylalanine biosynthetic process	GO:0003855//GO:0004764//GO:0016491//GO:0051287//GO:0050661	3-dehydroquinate dehydratase activity//shikimate 3-dehydrogenase (NADP+) activity//oxidoreductase activity//NAD binding//NADP binding	--	--	KOG0692	Pentafunctional AROM protein	FALSE	0.412204	0.651408	FALSE	0.0122527	1	FALSE	0.31368	0.670079	FALSE	0.269533	0.821767	FALSE	0.231778	0.796605
Cluster-11149.15595	9.11	15.41	16.59	12.94	7.47	1747	747076412	XP_011085277.1	463	2.6e-43	uncharacterized protein LOC105167315 [Sesamum indicum]	XM_011086975.2	XM_011086975	195	8.11e-95	PREDICTED: Sesamum indicum putative pterin-4-alpha-carbinolamine dehydratase (LOC105167315), mRNA	K01724	PCBD, phhB	4a-hydroxytetrahydrobiopterin dehydratase	http://www.genome.jp/dbget-bin/www_bget?ko:K01724	Q6QJ72	359	1.1e-32	Pterin-4-alpha-carbinolamine dehydratase 2, mitochondrial OS=Arabidopsis thaliana OX=3702 GN=PDL2 PE=1 SV=1	PF01329	Pterin 4 alpha carbinolamine dehydratase	GO:0006729	tetrahydrobiopterin biosynthetic process	GO:0008124	4-alpha-hydroxytetrahydrobiopterin dehydratase activity	--	--	--	--	FALSE	0.454926	0.595274	FALSE	0.395938	0.666752	FALSE	0.740085	0.18476	FALSE	0.16783	1	FALSE	0.513731	0.426541
Cluster-11149.34243	10.01	10.31	20.64	11.91	9.41	585	1347704959	PPS03565.1	307	1.1e-25	hypothetical protein GOBAR_AA17111 [Gossypium barbadense]	XM_011096493.2	XM_011096493	128	4.58e-58	PREDICTED: Sesamum indicum UDP-glucuronic acid decarboxylase 1 (LOC105174398), mRNA	K08678	UXS1, uxs	UDP-glucuronate decarboxylase	http://www.genome.jp/dbget-bin/www_bget?ko:K08678	Q8VZC0	287	8.5e-25	UDP-glucuronic acid decarboxylase 1 OS=Arabidopsis thaliana OX=3702 GN=UXS1 PE=1 SV=1	PF01370	NAD dependent epimerase/dehydratase family	--	--	GO:0003824//GO:0050662	catalytic activity//obsolete coenzyme binding	--	--	KOG1429	dTDP-glucose 4-6-dehydratase/UDP-glucuronic acid decarboxylase	FALSE	0.013083	1	FALSE	-0.0597947	1	FALSE	-0.157308	0.955284	FALSE	0.409515	0.755401	FALSE	0.299709	0.755943
Cluster-11149.16330	19.43	52.51	40.15	27.61	18.55	2281	1276259606	PIN16769.1	2735	1.2e-306	Dihydroxy-acid dehydratase [Handroanthus impetiginosus]	XM_011075457.2	XM_011075457	1273	0	PREDICTED: Sesamum indicum dihydroxy-acid dehydratase, chloroplastic (LOC105158638), mRNA	K01687	ilvD	dihydroxy-acid dehydratase	http://www.genome.jp/dbget-bin/www_bget?ko:K01687	Q9LIR4	2481	1.3e-278	Dihydroxy-acid dehydratase, chloroplastic OS=Arabidopsis thaliana OX=3702 GN=DHAD PE=1 SV=1	PF00920//PF04023	dehydratase family//FeoA domain	--	--	GO:0003824//GO:0046914	catalytic activity//transition metal ion binding	--	--	KOG2448	Dihydroxy-acid dehydratase	FALSE	1.1286	0.0412473	FALSE	0.177755	0.939676	FALSE	1.19557	0.0152987	FALSE	0.167789	0.994301	FALSE	0.295533	0.717726
Cluster-11149.26847	60.15	117.34	129.85	75.59	60.39	1228	1276250272	PIN09213.1	946	1.8e-99	3-isopropylmalate dehydratase [Handroanthus impetiginosus]	XM_012971892.1	XM_012971892	409	0	PREDICTED: Erythranthe guttatus 3-isopropylmalate dehydratase small subunit 3-like (LOC105948664), mRNA	K01704	leuD	3-isopropylmalate/(R)-2-methylmalate dehydratase small subunit [EC:4.2.1.33 4.2.1.35]	http://www.genome.jp/dbget-bin/www_bget?ko:K01704	Q9ZW85	771	1.3e-80	3-isopropylmalate dehydratase small subunit 1 OS=Arabidopsis thaliana OX=3702 GN=SSU1 PE=1 SV=1	--	--	--	--	--	--	--	--	KOG0454	3-isopropylmalate dehydratase (aconitase superfamily)	FALSE	0.839599	0.166207	FALSE	-0.0733407	1	FALSE	0.655474	0.238794	FALSE	0.342093	0.761041	FALSE	0.218745	0.81201
Cluster-11149.6098	1.42	3.63	2.54	2.64	1	2181	1371521532	PSS17636.1	1612	1.9e-176	UDP-4-keto-6-deoxy-D-glucose 3,5-epimerase/UDP-4-keto-L-rhamnose 4-keto-reductase [Actinidia chinensis var. chinensis]	XM_011084633.2	XM_011084633	807	0	PREDICTED: Sesamum indicum trifunctional UDP-glucose 4,6-dehydratase/UDP-4-keto-6-deoxy-D-glucose 3,5-epimerase/UDP-4-keto-L-rhamnose-reductase RHM2-like (LOC105165578), mRNA	K12450	RHM	UDP-glucose 4,6-dehydratase	http://www.genome.jp/dbget-bin/www_bget?ko:K12450	Q9LPG6	1548	1.9e-170	Trifunctional UDP-glucose 4,6-dehydratase/UDP-4-keto-6-deoxy-D-glucose 3,5-epimerase/UDP-4-keto-L-rhamnose-reductase RHM2 OS=Arabidopsis thaliana OX=3702 GN=RHM2 PE=1 SV=1	PF01370//PF06558//PF01073//PF04319	NAD dependent epimerase/dehydratase family//Secretion monitor precursor protein (SecM)//3-beta hydroxysteroid dehydrogenase/isomerase family//NifZ domain	GO:0008207//GO:0055114//GO:0006694//GO:0008210//GO:0008209//GO:0009399	C21-steroid hormone metabolic process//oxidation-reduction process//steroid biosynthetic process//estrogen metabolic process//androgen metabolic process//nitrogen fixation	GO:0003854//GO:0045182//GO:0016616//GO:0003824//GO:0050662	3-beta-hydroxy-delta5-steroid dehydrogenase activity//translation regulator activity//oxidoreductase activity, acting on the CH-OH group of donors, NAD or NADP as acceptor//catalytic activity//obsolete coenzyme binding	--	--	KOG0747	Putative NAD+-dependent epimerases	FALSE	0.657335	0.391253	FALSE	1.00065	0.151319	FALSE	1.54712	0.00590042	FALSE	-0.217356	0.954288	FALSE	0.73299	0.299492
Cluster-11149.23279	9.41	15.97	13.35	11.26	7.71	1995	848852973	XP_012841577.1	789	4.7e-81	PREDICTED: imidazoleglycerol-phosphate dehydratase-like [Erythranthe guttata]	XM_012986123.1	XM_012986123	356	0	PREDICTED: Erythranthe guttatus imidazoleglycerol-phosphate dehydratase-like (LOC105961857), mRNA	K01693	hisB	imidazoleglycerol-phosphate dehydratase	http://www.genome.jp/dbget-bin/www_bget?ko:K01693	Q43072	778	3.4e-81	Imidazoleglycerol-phosphate dehydratase, chloroplastic OS=Pisum sativum OX=3888 GN=HIS3 PE=2 SV=1	PF03719//PF00475	Ribosomal protein S5, C-terminal domain//Imidazoleglycerol-phosphate dehydratase	GO:0042254//GO:0006412//GO:0000105	ribosome biogenesis//translation//histidine biosynthetic process	GO:0003735//GO:0004424	structural constituent of ribosome//imidazoleglycerol-phosphate dehydratase activity	GO:0005840	ribosome	KOG3143	Imidazoleglycerol-phosphate dehydratase	FALSE	0.705599	0.294505	FALSE	0.149517	0.994835	FALSE	0.744333	0.176579	FALSE	0.414893	0.65883	FALSE	0.514383	0.420623
Cluster-11149.32031	5.25	4.82	7.28	0	0.08	3376	1600623208	TEY12907.1	1802	2.7e-198	hypothetical protein Saspl_052359 [Salvia splendens]	XM_011092247.2	XM_011092247	693	0	PREDICTED: Sesamum indicum BTB/POZ domain-containing protein DOT3 (LOC105171212), mRNA	-	-	-	http://www.genome.jp/dbget-bin/www_bget?ko:-	Q9LFU0	1158	4.9e-125	BTB/POZ domain-containing protein DOT3 OS=Arabidopsis thaliana OX=3702 GN=DOT3 PE=2 SV=1	PF00651//PF02982	BTB/POZ domain//Scytalone dehydratase	GO:0006582	melanin metabolic process	GO:0005515//GO:0030411	protein binding//scytalone dehydratase activity	--	--	--	--	UP	11.5563	1.38e-24	FALSE	-5.83829	0.0907098	UP	5.53496	2.11e-17	UP	11.9832	3.8e-27	UP	6.19189	3.73e-21
Cluster-11149.29774	55.45	44.29	92.42	0.86	1.8	1278	1276251400	PIN10087.1	535	8.5e-52	Carbonate dehydratase [Handroanthus impetiginosus]	XM_020691968.1	XM_020691968	207	1.26e-101	PREDICTED: Sesamum indicum carbonic anhydrase 2-like (LOC105156604), transcript variant X2, mRNA	K01673	cynT, can	carbonic anhydrase	http://www.genome.jp/dbget-bin/www_bget?ko:K01673	P27141	490	5.4e-48	Carbonic anhydrase, chloroplastic OS=Nicotiana tabacum OX=4097 PE=2 SV=1	PF00484	Carbonic anhydrase	GO:0006730//GO:0006807	one-carbon metabolic process//nitrogen compound metabolic process	GO:0008270//GO:0004089	zinc ion binding//carbonate dehydratase activity	--	--	KOG1578	Predicted carbonic anhydrase involved in protection against oxidative damage	UP	5.8767	3.79e-24	FALSE	-1.45169	0.0609762	UP	4.31356	2.16e-16	UP	6.66677	1.38e-29	UP	5.16491	1.32e-21
Cluster-11149.29777	63.1	46.41	106.04	1.36	2.18	904	747078783	XP_011086567.1	357	2.6e-31	carbonic anhydrase 2-like [Sesamum indicum]	--	--	--	--	--	K01673	cynT, can	carbonic anhydrase	http://www.genome.jp/dbget-bin/www_bget?ko:K01673	P46513	294	2e-25	Carbonic anhydrase 2 (Fragment) OS=Flaveria linearis OX=4225 PE=2 SV=1	PF00484	Carbonic anhydrase	GO:0006730//GO:0006807	one-carbon metabolic process//nitrogen compound metabolic process	GO:0004089//GO:0008270	carbonate dehydratase activity//zinc ion binding	--	--	--	--	UP	5.2925	2.96e-20	FALSE	-1.07157	0.239385	UP	4.10944	1.24e-14	UP	6.19386	2.64e-26	UP	5.07185	1.51e-20
Cluster-11149.30293	5.62	16.47	22.5	26.53	2.36	1346	747071833	XP_011082806.1	1626	2.8e-178	trifunctional UDP-glucose 4,6-dehydratase/UDP-4-keto-6-deoxy-D-glucose 3,5-epimerase/UDP-4-keto-L-rhamnose-reductase RHM1 [Sesamum indicum]	XM_011084504.2	XM_011084504	636	0	PREDICTED: Sesamum indicum trifunctional UDP-glucose 4,6-dehydratase/UDP-4-keto-6-deoxy-D-glucose 3,5-epimerase/UDP-4-keto-L-rhamnose-reductase RHM1 (LOC105165479), mRNA	K12450	RHM	UDP-glucose 4,6-dehydratase	http://www.genome.jp/dbget-bin/www_bget?ko:K12450	Q9LPG6	1590	1.6e-175	Trifunctional UDP-glucose 4,6-dehydratase/UDP-4-keto-6-deoxy-D-glucose 3,5-epimerase/UDP-4-keto-L-rhamnose-reductase RHM2 OS=Arabidopsis thaliana OX=3702 GN=RHM2 PE=1 SV=1	PF01370//PF00891//PF01073	NAD dependent epimerase/dehydratase family//O-methyltransferase domain//3-beta hydroxysteroid dehydrogenase/isomerase family	GO:0006694//GO:0008210//GO:0008209//GO:0055114//GO:0008207	steroid biosynthetic process//estrogen metabolic process//androgen metabolic process//oxidation-reduction process//C21-steroid hormone metabolic process	GO:0050662//GO:0008171//GO:0003854//GO:0003824//GO:0016616	obsolete coenzyme binding//O-methyltransferase activity//3-beta-hydroxy-delta5-steroid dehydrogenase activity//catalytic activity//oxidoreductase activity, acting on the CH-OH group of donors, NAD or NADP as acceptor	--	--	KOG0747	Putative NAD+-dependent epimerases	FALSE	-0.483557	0.566119	UP	3.09326	2.3e-09	UP	2.49883	1.04e-06	DOWN	-1.56584	0.00301172	FALSE	1.47698	0.00870306
Cluster-19806.0	0.12	0.36	0.48	0.71	0.24	611	--	--	--	--	--	--	--	--	--	--	--	--	--	--	--	--	--	--	PF03938//PF00484//PF11744//PF07851	Outer membrane protein (OmpH-like)//Carbonic anhydrase//Aluminium activated malate transporter//TMPIT-like protein	GO:0006730//GO:0015743//GO:0006807	one-carbon metabolic process//malate transport//nitrogen compound metabolic process	GO:0051082//GO:0008270//GO:0004089	unfolded protein binding//zinc ion binding//carbonate dehydratase activity	GO:0016021	integral component of membrane	--	--	FALSE	-0.7149	0.869797	FALSE	1.11935	0.794971	FALSE	0.29826	1	FALSE	-1.80983	0.54395	FALSE	-0.7303	1
Cluster-11149.28927	54.56	68.35	64.07	64.57	33.67	1715	45935133	AAS79591.1	1596	1.1e-174	putative dihydroflavonol reductase [Ipomoea trifida]	XM_012983118.1	XM_012983118	693	0	PREDICTED: Erythranthe guttatus UDP-D-apiose/UDP-D-xylose synthase 2 (LOC105959089), mRNA	-	-	-	http://www.genome.jp/dbget-bin/www_bget?ko:-	Q9SGE0	1495	2.1e-164	UDP-D-apiose/UDP-D-xylose synthase 2 OS=Arabidopsis thaliana OX=3702 GN=AXS2 PE=2 SV=1	PF03721//PF01370//PF01073//PF03435	UDP-glucose/GDP-mannose dehydrogenase family, NAD binding domain//NAD dependent epimerase/dehydratase family//3-beta hydroxysteroid dehydrogenase/isomerase family//Saccharopine dehydrogenase NADP binding domain	GO:0008207//GO:0055114//GO:0008210//GO:0006694//GO:0008209	C21-steroid hormone metabolic process//oxidation-reduction process//estrogen metabolic process//steroid biosynthetic process//androgen metabolic process	GO:0051287//GO:0003854//GO:0016491//GO:0003824//GO:0016616//GO:0050662	NAD binding//3-beta-hydroxy-delta5-steroid dehydrogenase activity//oxidoreductase activity//catalytic activity//oxidoreductase activity, acting on the CH-OH group of donors, NAD or NADP as acceptor//obsolete coenzyme binding	--	--	KOG1429	dTDP-glucose 4-6-dehydratase/UDP-glucuronic acid decarboxylase	FALSE	0.28498	0.835728	FALSE	0.54282	0.446034	FALSE	0.717018	0.184306	FALSE	0.430896	0.612487	FALSE	0.923695	0.0741242
Cluster-11149.23677	11.9	22.27	20.29	24.55	11.09	1713	747075520	XP_011084797.1	881	8.7e-92	probable inactive receptor kinase At5g58300 [Sesamum indicum]	XM_015214702.2	XM_015214702	144	1.78e-66	PREDICTED: Solanum pennellii probable inactive receptor kinase At5g58300 (LOC107014678), transcript variant X2, mRNA	-	-	-	http://www.genome.jp/dbget-bin/www_bget?ko:-	Q9LVM0	673	4.3e-69	Probable inactive receptor kinase At5g58300 OS=Arabidopsis thaliana OX=3702 GN=At5g58300 PE=1 SV=1	PF00069//PF00800//PF07714	Protein kinase domain//Prephenate dehydratase//Protein tyrosine and serine/threonine kinase	GO:0000162//GO:0009094//GO:0006468//GO:0006571	tryptophan biosynthetic process//L-phenylalanine biosynthetic process//protein phosphorylation//tyrosine biosynthetic process	GO:0005524//GO:0004672//GO:0004664	ATP binding//protein kinase activity//prephenate dehydratase activity	--	--	--	--	FALSE	0.0622664	1	FALSE	0.749781	0.235525	FALSE	0.701272	0.205907	FALSE	-0.370659	0.739182	FALSE	0.329097	0.671689
Cluster-11149.34510	9.12	16.49	15.39	25.08	9.97	1131	848870739	XP_012835958.1	511	4.6e-49	PREDICTED: UDP-glucuronic acid decarboxylase 1-like [Erythranthe guttata]	XM_011096493.2	XM_011096493	238	6.48e-119	PREDICTED: Sesamum indicum UDP-glucuronic acid decarboxylase 1 (LOC105174398), mRNA	K08678	UXS1, uxs	UDP-glucuronate decarboxylase	http://www.genome.jp/dbget-bin/www_bget?ko:K08678	Q8VZC0	483	3.1e-47	UDP-glucuronic acid decarboxylase 1 OS=Arabidopsis thaliana OX=3702 GN=UXS1 PE=1 SV=1	--	--	--	--	--	--	--	--	KOG1429	dTDP-glucose 4-6-dehydratase/UDP-glucuronic acid decarboxylase	FALSE	-0.39896	0.690007	FALSE	0.933076	0.120524	FALSE	0.423367	0.52821	FALSE	-0.78764	0.2289	FALSE	0.0954177	1
Cluster-11149.23961	14.24	25.06	20.14	18.88	13.25	2042	747103255	XP_011099816.1	1859	4.1e-205	GDP-mannose 4,6 dehydratase 1 [Sesamum indicum]	XM_011101514.2	XM_011101514	816	0	PREDICTED: Sesamum indicum GDP-mannose 4,6 dehydratase 1 (LOC105178138), mRNA	K01711	gmd, GMDS	GDPmannose 4,6-dehydratase	http://www.genome.jp/dbget-bin/www_bget?ko:K01711	P93031	1693	2.7e-187	GDP-mannose 4,6 dehydratase 2 OS=Arabidopsis thaliana OX=3702 GN=MUR1 PE=1 SV=3	PF01370	NAD dependent epimerase/dehydratase family	--	--	GO:0050662//GO:0003824	obsolete coenzyme binding//catalytic activity	--	--	KOG1372	GDP-mannose 4,6 dehydratase	FALSE	0.61072	0.389571	FALSE	0.114264	1	FALSE	0.614204	0.278621	FALSE	0.267794	0.826522	FALSE	0.332046	0.660535
Cluster-11149.29526	2.39	4.4	4.96	7.61	3.4	770	604342643	EYU41667.1	411	1.2e-37	hypothetical protein MIMGU_mgv1a006632mg [Erythranthe guttata]	XM_011079117.2	XM_011079117	181	2.11e-87	PREDICTED: Sesamum indicum UDP-glucuronic acid decarboxylase 1 (LOC105161434), transcript variant X2, mRNA	K08678	UXS1, uxs	UDP-glucuronate decarboxylase	http://www.genome.jp/dbget-bin/www_bget?ko:K08678	Q8VZC0	397	2e-37	UDP-glucuronic acid decarboxylase 1 OS=Arabidopsis thaliana OX=3702 GN=UXS1 PE=1 SV=1	PF01370//PF01073	NAD dependent epimerase/dehydratase family//3-beta hydroxysteroid dehydrogenase/isomerase family	GO:0008210//GO:0006694//GO:0008209//GO:0008207//GO:0055114	estrogen metabolic process//steroid biosynthetic process//androgen metabolic process//C21-steroid hormone metabolic process//oxidation-reduction process	GO:0050662//GO:0003854//GO:0003824//GO:0016616	obsolete coenzyme binding//3-beta-hydroxy-delta5-steroid dehydrogenase activity//catalytic activity//oxidoreductase activity, acting on the CH-OH group of donors, NAD or NADP as acceptor	--	--	KOG1429	dTDP-glucose 4-6-dehydratase/UDP-glucuronic acid decarboxylase	FALSE	-0.578415	0.566119	FALSE	0.760068	0.357601	FALSE	0.0711735	1	FALSE	-1.00414	0.185145	FALSE	-0.293879	0.84538
Cluster-11149.42626	3.05	5.49	5.13	5.15	3.61	3336	1173818664	XP_020551985.1	948	2.9e-99	arogenate dehydratase/prephenate dehydratase 1, chloroplastic [Sesamum indicum]	XM_020696326.1	XM_020696326	386	0	PREDICTED: Sesamum indicum arogenate dehydratase/prephenate dehydratase 1, chloroplastic (LOC105167990), transcript variant X2, mRNA	-	-	-	http://www.genome.jp/dbget-bin/www_bget?ko:-	Q9SA96	662	1.6e-67	Arogenate dehydratase/prephenate dehydratase 1, chloroplastic OS=Arabidopsis thaliana OX=3702 GN=ADT1 PE=1 SV=1	PF00800	Prephenate dehydratase	GO:0006571//GO:0009094//GO:0000162	tyrosine biosynthetic process//L-phenylalanine biosynthetic process//tryptophan biosynthetic process	GO:0004664	prephenate dehydratase activity	--	--	--	--	FALSE	0.292565	0.835728	FALSE	0.116556	1	FALSE	0.298361	0.705108	FALSE	-0.0811628	1	FALSE	-0.0145962	1
Cluster-11149.47786	1.96	5.05	6.63	5.65	4.79	448	747086933	XP_011090988.1	782	6.8e-81	UDP-glucuronic acid decarboxylase 2 [Sesamum indicum]	XM_011092686.2	XM_011092686	343	1.05e-177	PREDICTED: Sesamum indicum UDP-glucuronic acid decarboxylase 2 (LOC105171535), mRNA	K08678	UXS1, uxs	UDP-glucuronate decarboxylase	http://www.genome.jp/dbget-bin/www_bget?ko:K08678	Q9LZI2	765	2.4e-80	UDP-glucuronic acid decarboxylase 2 OS=Arabidopsis thaliana OX=3702 GN=UXS2 PE=1 SV=1	PF01370	NAD dependent epimerase/dehydratase family	--	--	GO:0003824//GO:0050662	catalytic activity//obsolete coenzyme binding	--	--	KOG1429	dTDP-glucose 4-6-dehydratase/UDP-glucuronic acid decarboxylase	FALSE	0.0760221	1	FALSE	-0.161006	1	FALSE	-0.195137	1	FALSE	-0.867404	0.579404	FALSE	-1.07643	0.301644
Cluster-11149.29918	12.95	20.19	21.29	33.34	15.41	1312	1276239598	PIN01395.1	989	2e-104	UDP-glucose 4-epimerase/UDP-sulfoquinovose synthase [Handroanthus impetiginosus]	XM_011079117.2	XM_011079117	315	1.19e-161	PREDICTED: Sesamum indicum UDP-glucuronic acid decarboxylase 1 (LOC105161434), transcript variant X2, mRNA	K08678	UXS1, uxs	UDP-glucuronate decarboxylase	http://www.genome.jp/dbget-bin/www_bget?ko:K08678	Q8VZC0	739	7.4e-77	UDP-glucuronic acid decarboxylase 1 OS=Arabidopsis thaliana OX=3702 GN=UXS1 PE=1 SV=1	PF01370//PF01073	NAD dependent epimerase/dehydratase family//3-beta hydroxysteroid dehydrogenase/isomerase family	GO:0055114//GO:0008207//GO:0008209//GO:0008210//GO:0006694	oxidation-reduction process//C21-steroid hormone metabolic process//androgen metabolic process//estrogen metabolic process//steroid biosynthetic process	GO:0016616//GO:0003824//GO:0003854//GO:0050662	oxidoreductase activity, acting on the CH-OH group of donors, NAD or NADP as acceptor//catalytic activity//3-beta-hydroxy-delta5-steroid dehydrogenase activity//obsolete coenzyme binding	--	--	KOG1429	dTDP-glucose 4-6-dehydratase/UDP-glucuronic acid decarboxylase	FALSE	-0.519	0.523701	FALSE	0.716144	0.271886	FALSE	0.086375	1	FALSE	-0.691508	0.299549	FALSE	-0.0253687	1
Cluster-11149.15946	6.21	10.42	7.96	11	6.6	1547	747071845	XP_011082813.1	1476	7.9e-161	uncharacterized protein LOC105165484 [Sesamum indicum]	XM_020694718.1	XM_020694718	612	0	PREDICTED: Sesamum indicum ribokinase (LOC105165484), transcript variant X2, mRNA	-	-	-	http://www.genome.jp/dbget-bin/www_bget?ko:-	A1A6H3	1157	2.9e-125	Ribokinase OS=Arabidopsis thaliana OX=3702 GN=RBSK PE=1 SV=1	PF00307//PF01256//PF08193//PF07646//PF02444	Calponin homology (CH) domain//Carbohydrate kinase//INO80 complex subunit Ies4//Kelch motif//Hepatitis E virus ORF-2 (Putative capsid protein)	GO:0006338	chromatin remodeling	GO:0005515//GO:0052855	protein binding//ADP-dependent NAD(P)H-hydrate dehydratase activity	GO:0031011//GO:0030430	Ino80 complex//host cell cytoplasm	KOG2855	Ribokinase	FALSE	0.125077	1	FALSE	0.339444	0.751255	FALSE	0.353769	0.627827	FALSE	-0.151666	1	FALSE	0.13777	0.952642
Cluster-11149.8782	0.77	1.63	1.24	0.38	1.04	1570	1181492502	YP_009354328.1	614	7.2e-61	ribosomal protein S8 (chloroplast) [Rehmannia elata]	MG977438.1	MG977438	1570	0	Rehmannia glutinosa cultivar Jiwhang 1 chloroplast, complete genome	K02994	RP-S8, rpsH	small subunit ribosomal protein S8	http://www.genome.jp/dbget-bin/www_bget?ko:K02994	Q68RX4	586	4.9e-59	30S ribosomal protein S11, chloroplastic OS=Panax ginseng OX=4054 GN=rps11 PE=3 SV=1	PF00444//PF01256//PF01176//PF00410//PF00411//PF10486	Ribosomal protein L36//Carbohydrate kinase//Translation initiation factor 1A / IF-1//Ribosomal protein S8//Ribosomal protein S11//Phosphoinositide 3-kinase gamma adapter protein p101 subunit	GO:0042254//GO:0006446//GO:0006413//GO:0006412	ribosome biogenesis//regulation of translational initiation//translational initiation//translation	GO:0003735//GO:0052855//GO:0003723//GO:0003743//GO:0046935	structural constituent of ribosome//ADP-dependent NAD(P)H-hydrate dehydratase activity//RNA binding//translation initiation factor activity//1-phosphatidylinositol-3-kinase regulator activity	GO:0005840//GO:0005944	ribosome//phosphatidylinositol 3-kinase complex, class IB	KOG0408	Mitochondrial/chloroplast ribosomal protein S11	UP	2.28069	0.00263819	FALSE	-1.82737	0.0303409	FALSE	0.34211	0.731677	FALSE	1.66667	0.0624822	FALSE	-0.209466	0.974523
Cluster-11149.15913	13.62	20.7	18.39	21.23	15.47	2234	1173769385	XP_020553137.1	1211	6.1e-130	ATP-dependent (S)-NAD(P)H-hydrate dehydratase isoform X1 [Sesamum indicum]	XM_011092482.2	XM_011092482	565	0	PREDICTED: Sesamum indicum ATP-dependent (S)-NAD(P)H-hydrate dehydratase (LOC105171385), transcript variant X2, mRNA	-	-	-	http://www.genome.jp/dbget-bin/www_bget?ko:-	F6HDM2	981	1.1e-104	ATP-dependent (S)-NAD(P)H-hydrate dehydratase OS=Vitis vinifera OX=29760 GN=VIT_05s0020g02800 PE=3 SV=1	PF01256	Carbohydrate kinase	--	--	GO:0052855	ADP-dependent NAD(P)H-hydrate dehydratase activity	--	--	KOG3974	Predicted sugar kinase	FALSE	0.164916	1	FALSE	0.0599151	1	FALSE	0.11406	0.96262	FALSE	0.0345829	1	FALSE	0.0444949	1
Cluster-11149.16346	45.78	39.77	42.9	27.82	37.11	1106	1276245521	PIN05592.1	1053	6.3e-112	putative carbonic anhydrase involved in protection against oxidative damage [Handroanthus impetiginosus]	XM_012989339.1	XM_012989339	481	0	PREDICTED: Erythranthe guttatus carbonic anhydrase 2-like (LOC105964834), transcript variant X2, mRNA	K01673	cynT, can	carbonic anhydrase	http://www.genome.jp/dbget-bin/www_bget?ko:K01673	P27141	891	1.5e-94	Carbonic anhydrase, chloroplastic OS=Nicotiana tabacum OX=4097 PE=2 SV=1	PF00484	Carbonic anhydrase	GO:0006730//GO:0006807	one-carbon metabolic process//nitrogen compound metabolic process	GO:0008270//GO:0004089	zinc ion binding//carbonate dehydratase activity	--	--	KOG1578	Predicted carbonic anhydrase involved in protection against oxidative damage	FALSE	0.721815	0.277636	FALSE	-0.81302	0.183587	FALSE	-0.201976	0.830691	FALSE	1.38911	0.00779892	FALSE	0.526084	0.387258
Cluster-11149.14910	19.68	28.08	30.89	9.87	27.47	1857	1276262101	PIN18851.1	1656	1.3e-181	hypothetical protein CDL12_08480 [Handroanthus impetiginosus]	XM_012993541.1	XM_012993541	420	0	PREDICTED: Erythranthe guttatus protein trichome birefringence-like 38 (LOC105968860), mRNA	-	-	-	http://www.genome.jp/dbget-bin/www_bget?ko:-	Q8VY22	1288	2.3e-140	Protein trichome birefringence-like 38 OS=Arabidopsis thaliana OX=3702 GN=TBL38 PE=2 SV=1	PF01119//PF10541//PF01220	DNA mismatch repair protein, C-terminal domain//Nuclear envelope localisation domain//Dehydroquinase class II	GO:0006298//GO:0000162//GO:0009094//GO:0006571	mismatch repair//tryptophan biosynthetic process//L-phenylalanine biosynthetic process//tyrosine biosynthetic process	GO:0030983//GO:0003855//GO:0005524	mismatched DNA binding//3-dehydroquinate dehydratase activity//ATP binding	GO:0016021	integral component of membrane	--	--	UP	1.71037	0.000773113	DOWN	-1.87247	0.000175583	FALSE	-0.272896	0.709123	UP	1.66926	0.00101592	FALSE	-0.253187	0.754906
Cluster-11149.26759	9.09	13.7	10.23	12.71	9.23	4307	747080295	XP_011087393.1	1192	1.9e-127	flowering locus K homology domain [Sesamum indicum]	XM_011089092.2	XM_011089092	549	0	PREDICTED: Sesamum indicum flowering locus K homology domain (LOC105168897), transcript variant X2, mRNA	K21444	-	-	http://www.genome.jp/dbget-bin/www_bget?ko:K21444	Q9SR13	838	8e-88	Flowering locus K homology domain OS=Arabidopsis thaliana OX=3702 GN=FLK PE=1 SV=1	PF13184//PF07650//PF01220//PF00013	NusA-like KH domain//KH domain//Dehydroquinase class II//KH domain	GO:0006571//GO:0000162//GO:0009094	tyrosine biosynthetic process//tryptophan biosynthetic process//L-phenylalanine biosynthetic process	GO:0003723//GO:0003855	RNA binding//3-dehydroquinate dehydratase activity	--	--	--	--	FALSE	0.307672	0.826882	FALSE	0.0654995	1	FALSE	0.262395	0.726621	FALSE	0.19314	0.948101	FALSE	0.208631	0.834695
Cluster-11149.29327	7.09	9.88	9.83	11.58	9.69	2533	747081325	XP_011087942.1	486	8.1e-46	beta carbonic anhydrase 5, chloroplastic isoform X2 [Sesamum indicum]	XM_011089640.2	XM_011089640	201	5.46e-98	PREDICTED: Sesamum indicum beta carbonic anhydrase 5, chloroplastic (LOC105169274), transcript variant X2, mRNA	K01673	cynT, can	carbonic anhydrase	http://www.genome.jp/dbget-bin/www_bget?ko:K01673	Q94CE3	307	1.8e-26	Beta carbonic anhydrase 5, chloroplastic OS=Arabidopsis thaliana OX=3702 GN=BCA5 PE=2 SV=1	PF03823//PF07819//PF00484	Neurokinin B//PGAP1-like protein//Carbonic anhydrase	GO:0006807//GO:0006730//GO:0007217	nitrogen compound metabolic process//one-carbon metabolic process//tachykinin receptor signaling pathway	GO:0008270//GO:0004089//GO:0016788	zinc ion binding//carbonate dehydratase activity//hydrolase activity, acting on ester bonds	--	--	--	--	FALSE	-0.0278369	1	FALSE	-0.140085	0.997555	FALSE	-0.278675	0.708454	FALSE	-0.0323408	1	FALSE	-0.222411	0.814237
Cluster-11149.7303	0.62	0.95	0.31	2.34	0.31	526	1340517515	XP_023739370.1	138	3.8e-06	UDP-glucuronic acid decarboxylase 1-like isoform X1 [Lactuca sativa]	XM_025118087.1	XM_025118087	53	2.01e-16	PREDICTED: Cynara cardunculus var. scolymus UDP-glucuronic acid decarboxylase 1 (LOC112512217), mRNA	K08678	UXS1, uxs	UDP-glucuronate decarboxylase	http://www.genome.jp/dbget-bin/www_bget?ko:K08678	Q8VZC0	128	2.1e-06	UDP-glucuronic acid decarboxylase 1 OS=Arabidopsis thaliana OX=3702 GN=UXS1 PE=1 SV=1	--	--	--	--	--	--	--	--	KOG1429	dTDP-glucose 4-6-dehydratase/UDP-glucuronic acid decarboxylase	FALSE	-1.06296	0.576666	FALSE	2.43988	0.153391	FALSE	1.26647	0.517719	FALSE	-1.227	0.487968	FALSE	1.15246	0.902688
Cluster-11149.16452	7.7	9.8	9.14	8.29	9.29	2117	747083955	XP_011089364.1	1519	1.1e-165	arogenate dehydratase/prephenate dehydratase 2, chloroplastic [Sesamum indicum]	XM_011091062.2	XM_011091062	717	0	PREDICTED: Sesamum indicum arogenate dehydratase/prephenate dehydratase 2, chloroplastic (LOC105170337), transcript variant X2, mRNA	K05359	ADT, PDT	arogenate/prephenate dehydratase [EC:4.2.1.91 4.2.1.51]	http://www.genome.jp/dbget-bin/www_bget?ko:K05359	Q9SSE7	1113	5.1e-120	Arogenate dehydratase/prephenate dehydratase 2, chloroplastic OS=Arabidopsis thaliana OX=3702 GN=ADT2 PE=1 SV=1	PF00800	Prephenate dehydratase	GO:0006571//GO:0000162//GO:0009094	tyrosine biosynthetic process//tryptophan biosynthetic process//L-phenylalanine biosynthetic process	GO:0004664	prephenate dehydratase activity	--	--	--	--	FALSE	0.442189	0.623902	FALSE	-0.559664	0.446034	FALSE	-0.228229	0.794138	FALSE	0.568476	0.447848	FALSE	-0.0411668	1
Cluster-11149.30687	37.58	71.69	62.52	70.83	71.19	689	848902281	XP_012851106.1	625	1.7e-62	PREDICTED: UDP-glucuronic acid decarboxylase 5-like [Erythranthe guttata]	XM_011095509.2	XM_011095509	289	1.73e-147	PREDICTED: Sesamum indicum UDP-glucuronic acid decarboxylase 6-like (LOC105173667), mRNA	K08678	UXS1, uxs	UDP-glucuronate decarboxylase	http://www.genome.jp/dbget-bin/www_bget?ko:K08678	Q9ZV36	553	1.4e-55	UDP-glucuronic acid decarboxylase 6 OS=Arabidopsis thaliana OX=3702 GN=UXS6 PE=2 SV=1	PF01370	NAD dependent epimerase/dehydratase family	--	--	GO:0050662//GO:0003824	obsolete coenzyme binding//catalytic activity	--	--	KOG1429	dTDP-glucose 4-6-dehydratase/UDP-glucuronic acid decarboxylase	FALSE	0.232707	0.913316	FALSE	-0.406353	0.631633	FALSE	-0.28441	0.705108	FALSE	-0.249467	0.856989	FALSE	-0.705787	0.207311
Cluster-11149.30686	10.14	28.35	25.2	40.66	29.22	1326	747106911	XP_011101753.1	311	8.3e-26	UDP-glucuronic acid decarboxylase 6 [Sesamum indicum]	XM_020691897.1	XM_020691897	125	5e-56	PREDICTED: Sesamum indicum UDP-glucuronic acid decarboxylase 5-like (LOC105156486), transcript variant X7, mRNA	K08678	UXS1, uxs	UDP-glucuronate decarboxylase	http://www.genome.jp/dbget-bin/www_bget?ko:K08678	Q9SN95	258	4.4e-21	UDP-glucuronic acid decarboxylase 5 OS=Arabidopsis thaliana OX=3702 GN=UXS5 PE=2 SV=1	PF06005	Cell division protein ZapB	GO:0043093//GO:0090529	FtsZ-dependent cytokinesis//cell septum assembly	--	--	GO:0005737	cytoplasm	KOG1429	dTDP-glucose 4-6-dehydratase/UDP-glucuronic acid decarboxylase	FALSE	-0.315221	0.817859	FALSE	0.0795778	1	FALSE	-0.346402	0.617213	FALSE	-1.3307	0.012486	FALSE	-1.30105	0.00999686
Cluster-11149.17390	15.95	38.32	33.65	41.04	40.8	1232	1527522452	XP_027111029.1	1172	1.1e-125	UDP-glucuronic acid decarboxylase 6-like isoform X1 [Coffea arabica]	XM_011095506.2	XM_011095506	540	0	PREDICTED: Sesamum indicum UDP-glucuronic acid decarboxylase 6-like (LOC105173665), transcript variant X1, mRNA	K08678	UXS1, uxs	UDP-glucuronate decarboxylase	http://www.genome.jp/dbget-bin/www_bget?ko:K08678	Q9ZV36	1097	2.1e-118	UDP-glucuronic acid decarboxylase 6 OS=Arabidopsis thaliana OX=3702 GN=UXS6 PE=2 SV=1	PF01370//PF01073//PF03435//PF02254	NAD dependent epimerase/dehydratase family//3-beta hydroxysteroid dehydrogenase/isomerase family//Saccharopine dehydrogenase NADP binding domain//TrkA-N domain	GO:0008207//GO:0055114//GO:0006813//GO:0008210//GO:0006694//GO:0008209	C21-steroid hormone metabolic process//oxidation-reduction process//potassium ion transport//estrogen metabolic process//steroid biosynthetic process//androgen metabolic process	GO:0016491//GO:0003854//GO:0016616//GO:0003824//GO:0050662	oxidoreductase activity//3-beta-hydroxy-delta5-steroid dehydrogenase activity//oxidoreductase activity, acting on the CH-OH group of donors, NAD or NADP as acceptor//catalytic activity//obsolete coenzyme binding	--	--	KOG1429	dTDP-glucose 4-6-dehydratase/UDP-glucuronic acid decarboxylase	FALSE	0.106052	1	FALSE	-0.388549	0.660889	FALSE	-0.393263	0.545337	FALSE	-0.691677	0.294996	FALSE	-1.13018	0.0262911
Cluster-11149.29804	18.53	31.87	28.73	28.84	35.45	432	747081325	XP_011087942.1	320	2.5e-27	beta carbonic anhydrase 5, chloroplastic isoform X2 [Sesamum indicum]	--	--	--	--	--	K01673	cynT, can	carbonic anhydrase	http://www.genome.jp/dbget-bin/www_bget?ko:K01673	Q94CE3	206	1.5e-15	Beta carbonic anhydrase 5, chloroplastic OS=Arabidopsis thaliana OX=3702 GN=BCA5 PE=2 SV=1	PF00484	Carbonic anhydrase	GO:0006807//GO:0006730	nitrogen compound metabolic process//one-carbon metabolic process	GO:0004089//GO:0008270	carbonate dehydratase activity//zinc ion binding	--	--	--	--	FALSE	0.386157	0.745833	FALSE	-0.698631	0.352951	FALSE	-0.423154	0.554142	FALSE	0.010478	1	FALSE	-0.737929	0.24315
Cluster-11149.32970	19.26	37.84	31.71	81.28	39.2	1020	747065992	XP_011079661.1	775	1e-79	UDP-glucuronic acid decarboxylase 2-like [Sesamum indicum]	XM_011081359.2	XM_011081359	325	2.53e-167	PREDICTED: Sesamum indicum UDP-glucuronic acid decarboxylase 2-like (LOC105163124), mRNA	K08678	UXS1, uxs	UDP-glucuronate decarboxylase	http://www.genome.jp/dbget-bin/www_bget?ko:K08678	Q8S8T4	730	6.3e-76	UDP-glucuronic acid decarboxylase 4 OS=Arabidopsis thaliana OX=3702 GN=UXS4 PE=2 SV=1	PF01370	NAD dependent epimerase/dehydratase family	--	--	GO:0050662//GO:0003824	obsolete coenzyme binding//catalytic activity	--	--	KOG1429	dTDP-glucose 4-6-dehydratase/UDP-glucuronic acid decarboxylase	FALSE	-0.895419	0.138884	FALSE	0.654213	0.329364	FALSE	-0.35196	0.606324	FALSE	-1.40722	0.00704627	FALSE	-0.802978	0.143485
Cluster-11149.19393	17.1	29.85	26.67	53.7	34.29	1304	747106915	XP_011101755.1	1020	5e-108	UDP-glucuronic acid decarboxylase 6 [Sesamum indicum]	XM_011103453.2	XM_011103453	463	0	PREDICTED: Sesamum indicum UDP-glucuronic acid decarboxylase 6 (LOC105179814), transcript variant X4, mRNA	K08678	UXS1, uxs	UDP-glucuronate decarboxylase	http://www.genome.jp/dbget-bin/www_bget?ko:K08678	Q9ZV36	944	1.2e-100	UDP-glucuronic acid decarboxylase 6 OS=Arabidopsis thaliana OX=3702 GN=UXS6 PE=2 SV=1	PF01370//PF01073//PF03435//PF02254	NAD dependent epimerase/dehydratase family//3-beta hydroxysteroid dehydrogenase/isomerase family//Saccharopine dehydrogenase NADP binding domain//TrkA-N domain	GO:0008209//GO:0006694//GO:0008210//GO:0006813//GO:0008207//GO:0055114	androgen metabolic process//steroid biosynthetic process//estrogen metabolic process//potassium ion transport//C21-steroid hormone metabolic process//oxidation-reduction process	GO:0050662//GO:0003824//GO:0016616//GO:0003854//GO:0016491	obsolete coenzyme binding//catalytic activity//oxidoreductase activity, acting on the CH-OH group of donors, NAD or NADP as acceptor//3-beta-hydroxy-delta5-steroid dehydrogenase activity//oxidoreductase activity	--	--	KOG1429	dTDP-glucose 4-6-dehydratase/UDP-glucuronic acid decarboxylase	FALSE	-0.642087	0.365147	FALSE	0.249918	0.836084	FALSE	-0.502925	0.411388	FALSE	-0.978518	0.0918361	FALSE	-0.778576	0.156589
Cluster-11149.12152	0.07	0.08	0.23	1.4	0.3	826	1130857573	GAV62666.1	195	1.5e-12	Epimerase domain-containing protein [Cephalotus follicularis]	XM_011079117.2	XM_011079117	86	1.47e-34	PREDICTED: Sesamum indicum UDP-glucuronic acid decarboxylase 1 (LOC105161434), transcript variant X2, mRNA	K08678	UXS1, uxs	UDP-glucuronate decarboxylase	http://www.genome.jp/dbget-bin/www_bget?ko:K08678	Q8VZC0	191	1.6e-13	UDP-glucuronic acid decarboxylase 1 OS=Arabidopsis thaliana OX=3702 GN=UXS1 PE=1 SV=1	PF01370	NAD dependent epimerase/dehydratase family	--	--	GO:0003824//GO:0050662	catalytic activity//obsolete coenzyme binding	--	--	KOG1429	dTDP-glucose 4-6-dehydratase/UDP-glucuronic acid decarboxylase	DOWN	-3.83911	0.00496784	FALSE	1.79612	0.157046	FALSE	-2.12692	0.603248	FALSE	-3.4479	0.0296061	FALSE	-1.68433	0.618116
Cluster-11149.10162	0.99	1.41	1.1	1.29	1.45	1497	1276267412	PIN23357.1	240	1.6e-17	hypothetical protein CDL12_03943 [Handroanthus impetiginosus]	MN877388.1	MN877388	72	1.64e-26	Neolamarckia macrophylla chloroplast, complete genome	-	-	-	http://www.genome.jp/dbget-bin/www_bget?ko:-	--	--	--	--	PF01256	Carbohydrate kinase	--	--	GO:0052855	ADP-dependent NAD(P)H-hydrate dehydratase activity	--	--	--	--	FALSE	0.336833	0.908313	FALSE	-0.567271	0.638036	FALSE	-0.340874	0.740476	FALSE	0.288281	0.941862	FALSE	-0.328532	0.803283
Cluster-11149.25377	21.5	39.09	46.81	48.68	66.97	3207	1276236366	PIM99361.1	2527	2.2e-282	putative NAD+-dependent epimerase [Handroanthus impetiginosus]	XM_011084504.2	XM_011084504	1059	0	PREDICTED: Sesamum indicum trifunctional UDP-glucose 4,6-dehydratase/UDP-4-keto-6-deoxy-D-glucose 3,5-epimerase/UDP-4-keto-L-rhamnose-reductase RHM1 (LOC105165479), mRNA	K12450	RHM	UDP-glucose 4,6-dehydratase	http://www.genome.jp/dbget-bin/www_bget?ko:K12450	Q9SYM5	2378	1.6e-266	Trifunctional UDP-glucose 4,6-dehydratase/UDP-4-keto-6-deoxy-D-glucose 3,5-epimerase/UDP-4-keto-L-rhamnose-reductase RHM1 OS=Arabidopsis thaliana OX=3702 GN=RHM1 PE=1 SV=1	PF01370//PF01073	NAD dependent epimerase/dehydratase family//3-beta hydroxysteroid dehydrogenase/isomerase family	GO:0055114//GO:0008207//GO:0008209//GO:0008210//GO:0006694	oxidation-reduction process//C21-steroid hormone metabolic process//androgen metabolic process//estrogen metabolic process//steroid biosynthetic process	GO:0016616//GO:0003824//GO:0003854//GO:0050662	oxidoreductase activity, acting on the CH-OH group of donors, NAD or NADP as acceptor//catalytic activity//3-beta-hydroxy-delta5-steroid dehydrogenase activity//obsolete coenzyme binding	--	--	KOG0747	Putative NAD+-dependent epimerases	FALSE	-0.116	1	FALSE	-0.856266	0.143521	FALSE	-1.08329	0.0292425	FALSE	-0.502577	0.517176	DOWN	-1.40884	0.00382402
Cluster-11149.25871	173.7	76.05	166.09	155.62	246.82	3612	1276236366	PIM99361.1	2569	3.4e-287	putative NAD+-dependent epimerase [Handroanthus impetiginosus]	XM_011075801.2	XM_011075801	1017	0	PREDICTED: Sesamum indicum protein GIGANTEA-like (LOC105158892), mRNA	K12450	RHM	UDP-glucose 4,6-dehydratase	http://www.genome.jp/dbget-bin/www_bget?ko:K12450	Q9SYM5	2419	3.2e-271	Trifunctional UDP-glucose 4,6-dehydratase/UDP-4-keto-6-deoxy-D-glucose 3,5-epimerase/UDP-4-keto-L-rhamnose-reductase RHM1 OS=Arabidopsis thaliana OX=3702 GN=RHM1 PE=1 SV=1	PF01370//PF01073	NAD dependent epimerase/dehydratase family//3-beta hydroxysteroid dehydrogenase/isomerase family	GO:0008207//GO:0055114//GO:0008209//GO:0006694//GO:0008210	C21-steroid hormone metabolic process//oxidation-reduction process//androgen metabolic process//steroid biosynthetic process//estrogen metabolic process	GO:0016616//GO:0003824//GO:0003854//GO:0050662	oxidoreductase activity, acting on the CH-OH group of donors, NAD or NADP as acceptor//catalytic activity//3-beta-hydroxy-delta5-steroid dehydrogenase activity//obsolete coenzyme binding	--	--	KOG0747	Putative NAD+-dependent epimerases	FALSE	-0.833216	0.167737	FALSE	-1.06125	0.0507006	DOWN	-2.00525	1.83e-05	FALSE	0.834734	0.155792	FALSE	-0.276523	0.718417
Cluster-11149.20917	7.69	17	15.26	35.5	22.85	3642	1276244129	PIN04576.1	1912	5.2e-211	dTDP-glucose 4-6-dehydratase/UDP-glucuronic acid decarboxylase [Handroanthus impetiginosus]	XM_011084169.2	XM_011084169	475	0	PREDICTED: Sesamum indicum UDP-glucuronic acid decarboxylase 2 (LOC105165224), mRNA	K08678	UXS1, uxs	UDP-glucuronate decarboxylase	http://www.genome.jp/dbget-bin/www_bget?ko:K08678	Q9LZI2	1690	1.1e-186	UDP-glucuronic acid decarboxylase 2 OS=Arabidopsis thaliana OX=3702 GN=UXS2 PE=1 SV=1	PF01073//PF01370	3-beta hydroxysteroid dehydrogenase/isomerase family//NAD dependent epimerase/dehydratase family	GO:0008207//GO:0055114//GO:0006694//GO:0008210//GO:0008209	C21-steroid hormone metabolic process//oxidation-reduction process//steroid biosynthetic process//estrogen metabolic process//androgen metabolic process	GO:0003854//GO:0016616//GO:0003824//GO:0050662	3-beta-hydroxy-delta5-steroid dehydrogenase activity//oxidoreductase activity, acting on the CH-OH group of donors, NAD or NADP as acceptor//catalytic activity//obsolete coenzyme binding	--	--	KOG1429	dTDP-glucose 4-6-dehydratase/UDP-glucuronic acid decarboxylase	FALSE	-0.862287	0.156819	FALSE	0.23959	0.850616	FALSE	-0.733464	0.171197	DOWN	-1.53032	0.0026128	FALSE	-1.34071	0.00658507
Cluster-11149.2377	0	10.49	8.9	8.17	15.55	494	1279006838	XP_022863847.1	320	2.8e-27	UDP-glucuronic acid decarboxylase 6 [Olea europaea var. sylvestris]	XM_011095509.2	XM_011095509	138	1.06e-63	PREDICTED: Sesamum indicum UDP-glucuronic acid decarboxylase 6-like (LOC105173667), mRNA	K08678	UXS1, uxs	UDP-glucuronate decarboxylase	http://www.genome.jp/dbget-bin/www_bget?ko:K08678	Q9ZV36	281	3.5e-24	UDP-glucuronic acid decarboxylase 6 OS=Arabidopsis thaliana OX=3702 GN=UXS6 PE=2 SV=1	--	--	--	--	--	--	--	--	KOG1429	dTDP-glucose 4-6-dehydratase/UDP-glucuronic acid decarboxylase	FALSE	0.590558	0.579566	FALSE	-1.32685	0.0383504	FALSE	-0.846827	0.177919	DOWN	-8.25928	5.63e-06	DOWN	-9.36294	4.39e-12
Cluster-11149.26820	31.65	27.4	31.38	19.97	59.1	2245	747082993	XP_011088846.1	1931	2e-213	arogenate dehydratase/prephenate dehydratase 6, chloroplastic-like [Sesamum indicum]	XM_012983100.1	XM_012983100	672	0	PREDICTED: Erythranthe guttatus arogenate dehydratase/prephenate dehydratase 6, chloroplastic-like (LOC105959077), mRNA	K05359	ADT, PDT	arogenate/prephenate dehydratase [EC:4.2.1.91 4.2.1.51]	http://www.genome.jp/dbget-bin/www_bget?ko:K05359	Q9SGD6	1543	7.4e-170	Arogenate dehydratase/prephenate dehydratase 6, chloroplastic OS=Arabidopsis thaliana OX=3702 GN=ADT6 PE=1 SV=1	PF00800	Prephenate dehydratase	GO:0006571//GO:0000162//GO:0009094	tyrosine biosynthetic process//tryptophan biosynthetic process//L-phenylalanine biosynthetic process	GO:0004664	prephenate dehydratase activity	--	--	--	--	FALSE	0.657516	0.344176	DOWN	-1.9616	6.07e-05	DOWN	-1.41486	0.00346698	FALSE	1.33921	0.010071	FALSE	-0.672383	0.226807
Cluster-11149.8194	0.09	1.03	0.28	0.54	0.55	720	1191659137	OTG11107.1	522	1.5e-50	putative reverse transcriptase domain-containing protein [Helianthus annuus]	--	--	--	--	--	-	-	-	http://www.genome.jp/dbget-bin/www_bget?ko:-	Q7LHG5	230	4.3e-18	Transposon Ty3-I Gag-Pol polyprotein OS=Saccharomyces cerevisiae (strain ATCC 204508 / S288c) OX=559292 GN=TY3B-I PE=1 SV=2	PF00665//PF00475	Integrase core domain//Imidazoleglycerol-phosphate dehydratase	GO:0000105//GO:0015074	histidine biosynthetic process//DNA integration	GO:0004424	imidazoleglycerol-phosphate dehydratase activity	--	--	--	--	FALSE	1.12077	0.504387	FALSE	-0.416044	1	FALSE	0.593786	0.86907	FALSE	-1.80983	0.54395	FALSE	-2.25363	0.293937
Cluster-11149.29408	1.27	2.28	2.31	5.57	4.54	2836	747064266	XP_011078708.1	1100	5.8e-117	bifunctional 3-dehydroquinate dehydratase/shikimate dehydrogenase, chloroplastic-like [Sesamum indicum]	XM_011080406.2	XM_011080406	505	0	PREDICTED: Sesamum indicum bifunctional 3-dehydroquinate dehydratase/shikimate dehydrogenase, chloroplastic-like (LOC105162411), mRNA	K13832	aroDE, DHQ-SDH	3-dehydroquinate dehydratase / shikimate dehydrogenase [EC:4.2.1.10 1.1.1.25]	http://www.genome.jp/dbget-bin/www_bget?ko:K13832	Q9SQT8	635	1.8e-64	Bifunctional 3-dehydroquinate dehydratase/shikimate dehydrogenase, chloroplastic OS=Arabidopsis thaliana OX=3702 GN=EMB3004 PE=1 SV=1	PF01487//PF08501	Type I 3-dehydroquinase//Shikimate dehydrogenase substrate binding domain	GO:0006571//GO:0055114//GO:0009094//GO:0000162	tyrosine biosynthetic process//oxidation-reduction process//L-phenylalanine biosynthetic process//tryptophan biosynthetic process	GO:0003855//GO:0004764	3-dehydroquinate dehydratase activity//shikimate 3-dehydrogenase (NADP+) activity	--	--	KOG0692	Pentafunctional AROM protein	FALSE	-1.08721	0.0711056	FALSE	-0.0995126	1	FALSE	-1.29732	0.0137084	FALSE	-1.45204	0.00978839	DOWN	-1.60129	0.00236176
Cluster-11149.39317	13.16	11.52	10.55	38.12	21.76	857	747106353	XP_011101468.1	812	4.3e-84	threonine dehydratase biosynthetic, chloroplastic-like isoform X1 [Sesamum indicum]	XM_011103166.2	XM_011103166	369	0	PREDICTED: Sesamum indicum threonine dehydratase biosynthetic, chloroplastic-like (LOC105179515), transcript variant X1, mRNA	K01754	E4.3.1.19, ilvA, tdcB	threonine dehydratase	http://www.genome.jp/dbget-bin/www_bget?ko:K01754	A0FKE6	692	1.4e-71	Threonine dehydratase 1 biosynthetic, chloroplastic OS=Solanum lycopersicum OX=4081 GN=TD1 PE=1 SV=1	--	--	--	--	--	--	--	--	KOG1250	Threonine/serine dehydratases	DOWN	-1.51529	0.00484328	FALSE	0.410596	0.641071	FALSE	-1.21532	0.0192753	FALSE	-0.866243	0.162536	FALSE	-0.505601	0.446161
Cluster-11149.39316	15.99	13.08	9.77	38.51	21.79	1660	747106353	XP_011101468.1	1997	3.3e-221	threonine dehydratase biosynthetic, chloroplastic-like isoform X1 [Sesamum indicum]	XM_020691353.1	XM_020691353	1027	0	PREDICTED: Sesamum indicum threonine dehydratase biosynthetic, chloroplastic-like (LOC105179515), transcript variant X2, mRNA	K01754	E4.3.1.19, ilvA, tdcB	threonine dehydratase	http://www.genome.jp/dbget-bin/www_bget?ko:K01754	A0FKE6	1639	4.1e-181	Threonine dehydratase 1 biosynthetic, chloroplastic OS=Solanum lycopersicum OX=4081 GN=TD1 PE=1 SV=1	PF10120	Thiamine-phosphate synthase	--	--	GO:0004789	thiamine-phosphate diphosphorylase activity	--	--	KOG1250	Threonine/serine dehydratases	FALSE	-1.35446	0.0109431	FALSE	0.424932	0.606132	FALSE	-1.04025	0.0417686	FALSE	-0.59476	0.39043	FALSE	-0.219825	0.817124
Cluster-14353.0	0	2.62	0.25	1.3	1.05	413	1279071033	XP_022897597.1	548	8.5e-54	uncharacterized protein LOC111411281 [Olea europaea var. sylvestris]	--	--	--	--	--	-	-	-	http://www.genome.jp/dbget-bin/www_bget?ko:-	Q7LHG5	222	2.1e-17	Transposon Ty3-I Gag-Pol polyprotein OS=Saccharomyces cerevisiae (strain ATCC 204508 / S288c) OX=559292 GN=TY3B-I PE=1 SV=2	PF00665//PF00475	Integrase core domain//Imidazoleglycerol-phosphate dehydratase	GO:0015074//GO:0000105	DNA integration//histidine biosynthetic process	GO:0004424	imidazoleglycerol-phosphate dehydratase activity	--	--	--	--	FALSE	1.24138	0.435717	FALSE	-0.0999557	1	FALSE	1.02971	0.517719	FALSE	-5.06564	0.362672	FALSE	-4.9488	0.278772
Cluster-11149.15748	1.69	2.83	1.54	12.26	7.63	352	747052851	XP_011072557.1	198	2.8e-13	putative late blight resistance protein homolog R1B-16 isoform X1 [Sesamum indicum]	--	--	--	--	--	-	-	-	http://www.genome.jp/dbget-bin/www_bget?ko:-	--	--	--	--	PF01329	Pterin 4 alpha carbinolamine dehydratase	GO:0006729	tetrahydrobiopterin biosynthetic process	GO:0008124	4-alpha-hydroxytetrahydrobiopterin dehydratase activity	--	--	--	--	FALSE	-1.82098	0.0663758	FALSE	0.279137	0.944538	FALSE	-1.64877	0.0903705	FALSE	-2.20074	0.054385	FALSE	-1.96617	0.0646158
Cluster-11149.4747	3.7	1.58	0.38	0.8	2.82	355	848851246	XP_012835526.1	453	7.6e-43	PREDICTED: LOW QUALITY PROTEIN: uncharacterized protein LOC105956226 [Erythranthe guttata]	XM_012980072.1	XM_012980072	164	2.6e-78	PREDICTED: Erythranthe guttatus uncharacterized LOC105956226 (LOC105956226), mRNA	-	-	-	http://www.genome.jp/dbget-bin/www_bget?ko:-	--	--	--	--	PF03435//PF01220//PF13096//PF01073	Saccharopine dehydrogenase NADP binding domain//Dehydroquinase class II//CENP-A-nucleosome distal (CAD) centromere subunit, CENP-P//3-beta hydroxysteroid dehydrogenase/isomerase family	GO:0008207//GO:0006571//GO:0055114//GO:0034080//GO:0009094//GO:0000162//GO:0008209//GO:0006694//GO:0008210	C21-steroid hormone metabolic process//tyrosine biosynthetic process//oxidation-reduction process//CENP-A containing nucleosome assembly//L-phenylalanine biosynthetic process//tryptophan biosynthetic process//androgen metabolic process//steroid biosynthetic process//estrogen metabolic process	GO:0003855//GO:0016616//GO:0016491//GO:0003854	3-dehydroquinate dehydratase activity//oxidoreductase activity, acting on the CH-OH group of donors, NAD or NADP as acceptor//oxidoreductase activity//3-beta-hydroxy-delta5-steroid dehydrogenase activity	GO:0000775	chromosome, centromeric region	--	--	FALSE	1.20913	1	FALSE	-2.15403	0.361408	FALSE	-1.05355	0.65052	FALSE	2.75759	0.0634628	FALSE	0.558372	0.724288
Cluster-11149.14168	4.76	5.38	1.06	2.97	8.43	2453	747092460	XP_011093995.1	1655	2.2e-181	uncharacterized protein LOC105173814 isoform X1 [Sesamum indicum]	XM_020697668.1	XM_020697668	607	0	PREDICTED: Sesamum indicum ESX-3 secretion system protein EccA3 (LOC105173814), transcript variant X2, mRNA	-	-	-	http://www.genome.jp/dbget-bin/www_bget?ko:-	P95648	389	5.3e-36	Protein CbbX OS=Rhodobacter sphaeroides OX=1063 GN=cbbX PE=1 SV=1	PF07728//PF04566//PF00158//PF00004//PF03786//PF00023//PF06309//PF13606//PF01443//PF07724//PF08303//PF05496//PF00005	AAA domain (dynein-related subfamily)//RNA polymerase Rpb2, domain 4//Sigma-54 interaction domain//ATPase family associated with various cellular activities (AAA)//D-mannonate dehydratase (UxuA)//Ankyrin repeat//Torsin//Ankyrin repeat//Viral (Superfamily 1) RNA helicase//AAA domain (Cdc48 subfamily)//tRNA ligase kinase domain//Holliday junction DNA helicase RuvB P-loop domain//ABC transporter	GO:0006310//GO:0006388//GO:0006351//GO:0006206//GO:0006355//GO:0006064//GO:0006281//GO:0006144	DNA recombination//tRNA splicing, via endonucleolytic cleavage and ligation//transcription, DNA-templated//pyrimidine nucleobase metabolic process//regulation of transcription, DNA-templated//glucuronate catabolic process//DNA repair//purine nucleobase metabolic process	GO:0003899//GO:0003972//GO:0008134//GO:0003677//GO:0005524//GO:0016887//GO:0008927//GO:0005515//GO:0009378	DNA-directed 5'-3' RNA polymerase activity//RNA ligase (ATP) activity//transcription factor binding//DNA binding//ATP binding//ATPase activity//mannonate dehydratase activity//protein binding//four-way junction helicase activity	GO:0005657//GO:0005667//GO:0009379//GO:0005730	replication fork//transcription regulator complex//Holliday junction helicase complex//nucleolus	--	--	FALSE	1.05859	0.0828197	DOWN	-1.90243	0.000218896	FALSE	-0.954593	0.0735144	FALSE	1.35648	0.0151633	FALSE	-0.595835	0.315933
Cluster-11149.46764	1.36	0.68	0.32	5.77	6.78	692	566192021	XP_006378724.1	294	4.1e-24	UDP-glucuronic acid decarboxylase 6 [Populus trichocarpa]	XM_011095509.2	XM_011095509	129	1.52e-58	PREDICTED: Sesamum indicum UDP-glucuronic acid decarboxylase 6-like (LOC105173667), mRNA	K08678	UXS1, uxs	UDP-glucuronate decarboxylase	http://www.genome.jp/dbget-bin/www_bget?ko:K08678	Q9ZV36	256	3.9e-21	UDP-glucuronic acid decarboxylase 6 OS=Arabidopsis thaliana OX=3702 GN=UXS6 PE=2 SV=1	--	--	--	--	--	--	--	--	KOG1429	dTDP-glucose 4-6-dehydratase/UDP-glucuronic acid decarboxylase	DOWN	-2.85833	0.000270345	FALSE	-0.628766	0.485866	DOWN	-3.59337	4.97e-07	FALSE	-1.41358	0.093697	DOWN	-2.09062	0.00152752
Cluster-1178.0	0	0	0	0	1.56	1051	1344021871	XP_023893807.1	1378	1.2e-149	LOW QUALITY PROTEIN: putative dihydroxy-acid dehydratase, mitochondrial [Quercus suber]	XM_024924442.1	XM_024924442	414	0	Trichoderma harzianum CBS 226.95 hypothetical protein (M431DRAFT_93128), partial mRNA	K01687	ilvD	dihydroxy-acid dehydratase	http://www.genome.jp/dbget-bin/www_bget?ko:K01687	Q10318	1305	1.4e-142	Putative dihydroxy-acid dehydratase, mitochondrial OS=Schizosaccharomyces pombe (strain 972 / ATCC 24843) OX=284812 GN=SPAC17G8.06c PE=2 SV=1	PF00920	dehydratase family	--	--	GO:0003824	catalytic activity	--	--	KOG2448	Dihydroxy-acid dehydratase	FALSE	-5.13e-15	1	DOWN	-8.09117	2.83e-06	DOWN	-8.00574	2.92e-06	FALSE	0	1	DOWN	-7.76594	1.35e-05
Cluster-1178.1	0	0	0	0	2.43	623	1605317469	TFJ86076.1	587	3.9e-58	hypothetical protein NSK_002896 [Nannochloropsis salina CCMP1776]	XM_024924442.1	XM_024924442	171	6.12e-82	Trichoderma harzianum CBS 226.95 hypothetical protein (M431DRAFT_93128), partial mRNA	K01687	ilvD	dihydroxy-acid dehydratase	http://www.genome.jp/dbget-bin/www_bget?ko:K01687	P39522	601	3.5e-61	Dihydroxy-acid dehydratase, mitochondrial OS=Saccharomyces cerevisiae (strain ATCC 204508 / S288c) OX=559292 GN=ILV3 PE=1 SV=2	PF00920	dehydratase family	--	--	GO:0003824	catalytic activity	--	--	KOG2448	Dihydroxy-acid dehydratase	FALSE	-5.13e-15	1	DOWN	-7.62752	6.96e-05	DOWN	-7.54222	5.5e-05	FALSE	0	1	DOWN	-7.30279	0.000200198
Cluster-5833.0	0	0	0	0.12	3.1	1333	1344040854	XP_023907855.1	1473	1.5e-160	delta-aminolevulinic acid dehydratase-like [Quercus suber]	XM_006695471.1	XM_006695471	409	0	Chaetomium thermophilum var. thermophilum DSM 1495 delta-aminolevulinic acid dehydratase-like protein (CTHT_0051940), partial mRNA	K01698	hemB, ALAD	porphobilinogen synthase	http://www.genome.jp/dbget-bin/www_bget?ko:K01698	O42768	1139	3.1e-123	Delta-aminolevulinic acid dehydratase OS=Candida glabrata (strain ATCC 2001 / CBS 138 / JCM 3761 / NBRC 0622 / NRRL Y-65) OX=284593 GN=HEM2 PE=3 SV=1	PF00228//PF00490	Bowman-Birk serine protease inhibitor family//Delta-aminolevulinic acid dehydratase	GO:0015994//GO:0033014	chlorophyll metabolic process//tetrapyrrole biosynthetic process	GO:0046872//GO:0004867//GO:0004655	metal ion binding//serine-type endopeptidase inhibitor activity//porphobilinogen synthase activity	GO:0005576	extracellular region	KOG2794	Delta-aminolevulinic acid dehydratase	FALSE	-4.52318	0.566119	DOWN	-5.05976	3.43e-10	DOWN	-9.42964	2.56e-12	FALSE	-4.35711	0.806498	DOWN	-9.18919	3.49e-11
Cluster-4117.0	0	0	0	0.18	1.67	482	1344040854	XP_023907855.1	516	5.1e-50	delta-aminolevulinic acid dehydratase-like [Quercus suber]	CP039680.1	CP039680	132	2.23e-60	Parastagonospora nodorum strain Sn79 chromosome 13	K01698	hemB, ALAD	porphobilinogen synthase	http://www.genome.jp/dbget-bin/www_bget?ko:K01698	Q750E0	419	3.4e-40	Delta-aminolevulinic acid dehydratase OS=Ashbya gossypii (strain ATCC 10895 / CBS 109.51 / FGSC 9923 / NRRL Y-1056) OX=284811 GN=HEM2 PE=3 SV=1	PF00490	Delta-aminolevulinic acid dehydratase	GO:0015994//GO:0033014	chlorophyll metabolic process//tetrapyrrole biosynthetic process	GO:0046872//GO:0004655	metal ion binding//porphobilinogen synthase activity	--	--	KOG2794	Delta-aminolevulinic acid dehydratase	FALSE	-3.05854	1	FALSE	-3.41842	0.0900985	FALSE	-6.33011	0.0146451	FALSE	-2.90649	1	FALSE	-6.09253	0.0245024
Cluster-4712.0	0	0	0	1.59	0.81	409	1344040854	XP_023907855.1	585	4.3e-58	delta-aminolevulinic acid dehydratase-like [Quercus suber]	--	--	--	--	--	K01698	hemB, ALAD	porphobilinogen synthase	http://www.genome.jp/dbget-bin/www_bget?ko:K01698	O42768	516	1.6e-51	Delta-aminolevulinic acid dehydratase OS=Candida glabrata (strain ATCC 2001 / CBS 138 / JCM 3761 / NBRC 0622 / NRRL Y-65) OX=284593 GN=HEM2 PE=3 SV=1	PF00490	Delta-aminolevulinic acid dehydratase	GO:0015994//GO:0033014	chlorophyll metabolic process//tetrapyrrole biosynthetic process	GO:0046872//GO:0004655	metal ion binding//porphobilinogen synthase activity	--	--	KOG2794	Delta-aminolevulinic acid dehydratase	FALSE	-5.49146	0.158449	FALSE	0.558958	1	FALSE	-4.78057	0.441562	FALSE	-5.32147	0.233253	FALSE	-4.54925	0.44892
Cluster-1665.0	0	0	0	0	1.04	583	1343993766	XP_023878947.1	594	5.6e-59	threonine dehydratase, mitochondrial-like [Quercus suber]	XM_022621966.1	XM_022621966	218	4.26e-108	Colletotrichum orchidophilum threonine ammonia-lyase (CORC01_10338), partial mRNA	K01754	E4.3.1.19, ilvA, tdcB	threonine dehydratase	http://www.genome.jp/dbget-bin/www_bget?ko:K01754	O94634	482	2.1e-47	Threonine dehydratase, mitochondrial OS=Schizosaccharomyces pombe (strain 972 / ATCC 24843) OX=284812 GN=SPBC1677.03c PE=3 SV=1	PF00853	Runt domain	GO:0006355	regulation of transcription, DNA-templated	GO:0003677//GO:0003700	DNA binding//DNA-binding transcription factor activity	GO:0005667	transcription regulator complex	KOG1250	Threonine/serine dehydratases	FALSE	-5.13e-15	1	FALSE	-6.24701	0.036604	FALSE	-6.16242	0.0233754	FALSE	0	1	FALSE	-5.92525	0.0393902
Cluster-748.0	0	0	0	0	1.37	439	1344039466	XP_023907118.1	403	5.9e-37	homoaconitase, mitochondrial-like [Quercus suber]	XM_008095521.1	XM_008095521	144	4.31e-67	Colletotrichum graminicola M1.001 homoaconitase partial mRNA	K01702	LEU1	3-isopropylmalate dehydratase	http://www.genome.jp/dbget-bin/www_bget?ko:K01702	Q2GN26	588	7.9e-60	Homoaconitase, mitochondrial OS=Chaetomium globosum (strain ATCC 6205 / CBS 148.51 / DSM 1962 / NBRC 6347 / NRRL 1970) OX=306901 GN=LYS4 PE=3 SV=1	--	--	--	--	--	--	--	--	KOG0454	3-isopropylmalate dehydratase (aconitase superfamily)	FALSE	-5.13e-15	1	FALSE	-5.83829	0.0907098	FALSE	-5.75408	0.101513	FALSE	0	1	FALSE	-5.5181	0.104156
Cluster-11149.48682	0	0	0	0	1.47	894	1173958018	OQS04443.1	221	1.5e-15	hypothetical protein THRCLA_20883 [Thraustotheca clavata]	XM_020277999.1	XM_020277999	72	9.66e-27	Diplodia corticola caib baif family enzyme (BKCO1_6100032), partial mRNA	-	-	-	http://www.genome.jp/dbget-bin/www_bget?ko:-	A0A2I6PIZ1	377	4.8e-35	Acetyl-coenzyme A transferase nodX OS=Hypoxylon pulicicidum OX=1243767 GN=nodX PE=3 SV=1	PF02515	CoA-transferase family III	--	--	GO:0008410	CoA-transferase activity	--	--	KOG3957	Predicted L-carnitine dehydratase/alpha-methylacyl-CoA racemase	FALSE	-5.13e-15	1	DOWN	-7.69431	4.77e-05	DOWN	-7.60898	3.74e-05	FALSE	0	1	DOWN	-7.36949	0.000133624
Cluster-11149.1783	0	0	0	2.38	44.91	750	1343991050	XP_023877513.1	668	1.9e-67	scytalone dehydratase-like [Quercus suber]	XM_009218899.1	XM_009218899	193	4.38e-94	Gaeumannomyces tritici R3-111a-1 scytalone dehydratase partial mRNA	--	--	--	--	P56221	711	7.4e-74	Scytalone dehydratase OS=Magnaporthe oryzae (strain 70-15 / ATCC MYA-4617 / FGSC 8958) OX=242507 GN=SDH1 PE=1 SV=1	PF02982	Scytalone dehydratase	GO:0006582	melanin metabolic process	GO:0030411	scytalone dehydratase activity	--	--	--	--	DOWN	-7.68844	3.56e-05	DOWN	-4.63259	1.29e-16	DOWN	-12.1648	6.75e-29	DOWN	-7.51524	0.000102479	DOWN	-11.9241	2.92e-27
Cluster-68.0	0	0	0	0	2.17	468	1344043962	XP_023901951.1	387	4.5e-35	1,3-beta-glucan synthase component FKS1-like [Quercus suber]	XM_008038539.1	XM_008038539	125	1.68e-56	Trametes versicolor FP-101664 SS1 1,3-beta-glucan synthase partial mRNA	--	--	--	--	O93927	551	1.6e-55	1,3-beta-glucan synthase component FKS1 OS=Cryptococcus neoformans var. grubii serotype A (strain H99 / ATCC 208821 / CBS 10515 / FGSC 9487) OX=235443 GN=FKS1 PE=3 SV=3	PF03786//PF02364	D-mannonate dehydratase (UxuA)//1,3-beta-glucan synthase component	GO:0006075//GO:0005982//GO:0005985//GO:0006064	(1->3)-beta-D-glucan biosynthetic process//starch metabolic process//sucrose metabolic process//glucuronate catabolic process	GO:0008927//GO:0003843	mannonate dehydratase activity//1,3-beta-D-glucan synthase activity	GO:0016020//GO:0000148	membrane//1,3-beta-D-glucan synthase complex	KOG0916	1,3-beta-glucan synthase/callose synthase catalytic subunit	FALSE	-5.13e-15	1	FALSE	-6.70126	0.00966091	FALSE	-6.61635	0.00586292	FALSE	0	1	FALSE	-6.37819	0.0158209
Cluster-980.0	0	0	0	0	3.38	350	--	--	--	--	--	--	--	--	--	--	--	--	--	--	--	--	--	--	PF13855//PF00475	Leucine rich repeat//Imidazoleglycerol-phosphate dehydratase	GO:0000105	histidine biosynthetic process	GO:0004424//GO:0005515	imidazoleglycerol-phosphate dehydratase activity//protein binding	--	--	--	--	FALSE	-5.13e-15	1	FALSE	-6.24701	0.036604	FALSE	-6.16242	0.0233754	FALSE	0	1	FALSE	-5.92525	0.0393902
Cluster-2628.0	0	0	0	0	1.16	586	1344053613	XP_023910115.1	366	1.5e-32	ATP-dependent (S)-NAD(P)H-hydrate dehydratase-like [Quercus suber]	--	--	--	--	--	K17757	CARKD	ATP-dependent NAD(P)H-hydrate dehydratase	http://www.genome.jp/dbget-bin/www_bget?ko:K17757	Q7SHU9	452	6.2e-44	ATP-dependent (S)-NAD(P)H-hydrate dehydratase OS=Neurospora crassa (strain ATCC 24698 / 74-OR23-1A / CBS 708.71 / DSM 1257 / FGSC 987) OX=367110 GN=NCU02513 PE=3 SV=1	PF01256	Carbohydrate kinase	--	--	GO:0052855	ADP-dependent NAD(P)H-hydrate dehydratase activity	--	--	KOG3974	Predicted sugar kinase	FALSE	-5.13e-15	1	FALSE	-6.41483	0.0234343	FALSE	-6.33011	0.0146451	FALSE	0	1	FALSE	-6.09253	0.0245024
Cluster-4189.0	0	0	0	0.15	3.58	828	669143344	XP_008607234.1	296	2.8e-24	hypothetical protein SDRG_03379 [Saprolegnia diclina VS20]	XM_027761888.1	XM_027761888	51	4.21e-15	Sparassis crispa Carbonic anhydrase (SCP_1000180), partial mRNA	-	-	-	http://www.genome.jp/dbget-bin/www_bget?ko:-	O94255	250	2.3e-20	Carbonic anhydrase OS=Schizosaccharomyces pombe (strain 972 / ATCC 24843) OX=284812 GN=SPBP8B7.05c PE=1 SV=2	PF05393//PF00484	Human adenovirus early E3A glycoprotein//Carbonic anhydrase	GO:0006730//GO:0006807	one-carbon metabolic process//nitrogen compound metabolic process	GO:0004089//GO:0008270	carbonate dehydratase activity//zinc ion binding	GO:0016021	integral component of membrane	KOG1578	Predicted carbonic anhydrase involved in protection against oxidative damage	FALSE	-3.96925	0.835728	DOWN	-4.91301	7.3e-08	DOWN	-8.7305	4.84e-09	FALSE	-3.80692	0.806498	DOWN	-8.49029	3.8e-08
Cluster-11149.47939	0	0	0	0.19	4.02	1151	1492334825	RLN85254.1	637	1.1e-63	hypothetical protein BBO99_00000715 [Phytophthora kernoviae]	XM_024655437.1	XM_024655437	167	1.94e-79	Sordaria macrospora k-hell uncharacterized protein (SMAC_03614), partial mRNA	-	-	-	http://www.genome.jp/dbget-bin/www_bget?ko:-	Q5BCC5	798	9.3e-84	Carbonic anhydrase OS=Emericella nidulans (strain FGSC A4 / ATCC 38163 / CBS 112.46 / NRRL 194 / M139) OX=227321 GN=AN1805 PE=1 SV=2	PF00484	Carbonic anhydrase	GO:0006730//GO:0006807	one-carbon metabolic process//nitrogen compound metabolic process	GO:0008270//GO:0004089	zinc ion binding//carbonate dehydratase activity	--	--	KOG1578	Predicted carbonic anhydrase involved in protection against oxidative damage	FALSE	-4.92245	0.380656	DOWN	-4.76803	5.55e-10	DOWN	-9.5364	8.12e-13	FALSE	-4.75444	0.557126	DOWN	-9.29593	9.83e-12
Cluster-6073.0	0	0	0	0.19	2.2	1776	1344025870	XP_023895907.1	1591	4.2e-174	guanine nucleotide-binding protein subunit alpha-like [Quercus suber]	XM_006967927.1	XM_006967927	695	0	Trichoderma reesei QM6a guanine nucleotide-binding protein (G-protein) alpha-1 subunit (TRIREDRAFT_123302), partial mRNA	K19729	GNAT3	guanine nucleotide-binding protein G(t) subunit alpha 3	http://www.genome.jp/dbget-bin/www_bget?ko:K19729	Q00580	1730	1.2e-191	Guanine nucleotide-binding protein subunit alpha OS=Cryphonectria parasitica OX=5116 PE=3 SV=3	PF01580//PF03419//PF01256//PF01926//PF04670//PF00025//PF00503//PF00493//PF02990//PF01988//PF01807	FtsK/SpoIIIE family//Sporulation factor SpoIIGA//Carbohydrate kinase//50S ribosome-binding GTPase//Gtr1/RagA G protein conserved region//ADP-ribosylation factor family//G-protein alpha subunit//MCM P-loop domain//Endomembrane protein 70//VIT family//CHC2 zinc finger	GO:0007186//GO:0006270//GO:0030436//GO:0030026//GO:0006828//GO:0006508//GO:0006351//GO:0006269//GO:0006260	G protein-coupled receptor signaling pathway//DNA replication initiation//asexual sporulation//cellular manganese ion homeostasis//manganese ion transport//proteolysis//transcription, DNA-templated//DNA replication, synthesis of RNA primer//DNA replication	GO:0003677//GO:0031683//GO:0005524//GO:0019001//GO:0052855//GO:0008270//GO:0005384//GO:0003924//GO:0005525//GO:0003896//GO:0004190//GO:0000166	DNA binding//G-protein beta/gamma-subunit complex binding//ATP binding//guanyl nucleotide binding//ADP-dependent NAD(P)H-hydrate dehydratase activity//zinc ion binding//manganese ion transmembrane transporter activity//GTPase activity//GTP binding//DNA primase activity//aspartic-type endopeptidase activity//nucleotide binding	GO:0005657//GO:0016021//GO:0005730	replication fork//integral component of membrane//nucleolus	KOG0082	G-protein alpha subunit (small G protein superfamily)	FALSE	-5.70927	0.101362	DOWN	-3.87544	2.79e-08	DOWN	-9.42964	2.56e-12	FALSE	-5.5387	0.148189	DOWN	-9.18919	3.49e-11
Cluster-8808.0	0.14	0	0	0.14	2.77	562	848866378	XP_012833863.1	347	2.4e-30	PREDICTED: putative disease resistance RPP13-like protein 3 [Erythranthe guttata]	--	--	--	--	--	-	-	-	http://www.genome.jp/dbget-bin/www_bget?ko:-	Q8W3K3	140	9e-08	Putative disease resistance protein At1g58400 OS=Arabidopsis thaliana OX=3702 GN=At1g58400 PE=3 SV=1	PF02671//PF01256	Paired amphipathic helix repeat//Carbohydrate kinase	GO:0006355	regulation of transcription, DNA-templated	GO:0052855	ADP-dependent NAD(P)H-hydrate dehydratase activity	--	--	--	--	FALSE	-3.05854	1	DOWN	-4.5611	0.00105605	DOWN	-7.47222	8.15e-05	FALSE	0.605157	1	DOWN	-3.96839	0.00194253
Cluster-11149.48776	0	0	0	0.2	2.67	1747	1344043116	XP_023901491.1	1116	5e-119	uncharacterized protein LOC112013327 [Quercus suber]	XM_014313522.1	XM_014313522	195	8.11e-95	Grosmannia clavigera kw1407 NAD dependent epimerase dehydratase family protein partial mRNA	--	--	--	--	--	--	--	--	PF01370//PF01073	NAD dependent epimerase/dehydratase family//3-beta hydroxysteroid dehydrogenase/isomerase family	GO:0008207//GO:0055114//GO:0008209//GO:0008210//GO:0006694	C21-steroid hormone metabolic process//oxidation-reduction process//androgen metabolic process//estrogen metabolic process//steroid biosynthetic process	GO:0016616//GO:0003824//GO:0003854//GO:0050662	oxidoreductase activity, acting on the CH-OH group of donors, NAD or NADP as acceptor//catalytic activity//3-beta-hydroxy-delta5-steroid dehydrogenase activity//obsolete coenzyme binding	--	--	--	--	FALSE	-5.70927	0.101362	DOWN	-4.12888	1.91e-09	DOWN	-9.68305	1.36e-13	FALSE	-5.5387	0.148189	DOWN	-9.44254	2.02e-12
[truncated: 13 more columns]
