# Supplementary material for: Transcriptome Analysis Provides Insights into Catalpol Biosynthesis in the Medicinal Plant Rehmannia glutinosa and the Functional Characterization of RgGES Genes
Source: Genes (Basel). 2024 Jan 24;15(2):155. doi: 10.3390/genes15020155 (PMC10888080; doi:10.3390/genes15020155)
Supplement: Supplementary file 1 [file genes-15-00155-s001.zip › Supplementary Table S13.xlsx]

## Sheet: Sheet1
Supplementary Table S13. Decarboxylase candidate genes in R. glutinosa transcriptomes. The unigenes which met the gene screening criteria were marked in red color.
gene_id	Fpkm(HFL)	Fpkm(BJL)	Fpkm(J9L)	Fpkm(J9R)	Fpkm(J9AR)	Gene Length	NR GI	NR ID	NR Score	NR Evalue	NR Description	NT GI	NT ID	NT Score	NT Evalue	NT Description	KO ID	KO Name	KO Description	Http Link	Swissprot ID	Swissprot Score	Swissprot Evalue	Swissprot Description	PFAM ID	PFAM description	Gene Ontology Biological Pathway	BP Description	Gene Ontology Molecular Function	MF Description	Gene Ontology Cellular Component	CC Description	KOG ID	KOG Description	UP_DOWN_REGULATION(BJ_LvsJ9_R)	log2FC(BJ_LvsJ9_R)	q value(BJ_LvsJ9_R)	UP_DOWN_REGULATION(J9_RvsJ9_X)	log2FC(J9_RvsJ9_X)	q value(J9_RvsJ9_X)	UP_DOWN_REGULATION(BJ_LvsJ9_X)	log2FC(BJ_LvsJ9_X)	q value(BJ_LvsJ9_X)	UP_DOWN_REGULATION(HF_LvsJ9_R)	log2FC(HF_LvsJ9_R)	q value(HF_LvsJ9_R)	UP_DOWN_REGULATION(HF_LvsJ9_X)	log2FC(HF_LvsJ9_X)	q value(HF_LvsJ9_X)
Cluster-11149.26246	54.84	76.55	77.46	0.36	0.13	1541	1279097073	XP_022859990.1	228	4.1e-16	repetitive proline-rich cell wall protein 2-like isoform X1 [Olea europaea var. sylvestris]	XM_011094558.2	XM_011094558	123	7.55e-55	PREDICTED: Sesamum indicum proline-rich protein 4-like (LOC105172935), mRNA	-	-	-	http://www.genome.jp/dbget-bin/www_bget?ko:-	Q9T0I5	203	1.2e-14	Proline-rich protein 4 OS=Arabidopsis thaliana OX=3702 GN=PRP4 PE=2 SV=1	PF04277	Oxaloacetate decarboxylase, gamma chain	GO:0006560//GO:0036376//GO:0006525//GO:0006090//GO:0006814	proline metabolic process//sodium ion export across plasma membrane//arginine metabolic process//pyruvate metabolic process//sodium ion transport	GO:0015081//GO:0008948	sodium ion transmembrane transporter activity//oxaloacetate decarboxylase activity	GO:0016020	membrane	--	--	UP	7.91915	4.77e-36	FALSE	1.01546	0.677692	UP	8.82066	7.95e-37	UP	7.90544	1.16e-35	UP	8.86279	5.91e-37
Cluster-11149.24825	7.11	14.62	18.86	1.6	0.29	1283	1276264727	PIN21090.1	341	2.7e-29	hypothetical protein CDL12_06214 [Handroanthus impetiginosus]	--	--	--	--	--	-	-	-	http://www.genome.jp/dbget-bin/www_bget?ko:-	--	--	--	--	PF04277//PF00558//PF01496//PF07074	Oxaloacetate decarboxylase, gamma chain//Vpu protein//V-type ATPase 116kDa subunit family//Translocon-associated protein, gamma subunit (TRAP-gamma)	GO:0006560//GO:0032801//GO:0006614//GO:0006814//GO:0006812//GO:0006525//GO:0019076//GO:0036376//GO:0006090//GO:1902600	proline metabolic process//receptor catabolic process//SRP-dependent cotranslational protein targeting to membrane//sodium ion transport//cation transport//arginine metabolic process//viral release from host cell//sodium ion export across plasma membrane//pyruvate metabolic process//proton transmembrane transport	GO:0015078//GO:0005261//GO:0015081//GO:0008948	proton transmembrane transporter activity//cation channel activity//sodium ion transmembrane transporter activity//oxaloacetate decarboxylase activity	GO:0016021//GO:0016020//GO:0033644//GO:0033179	integral component of membrane//membrane//host cell membrane//proton-transporting V-type ATPase, V0 domain	--	--	UP	3.39627	2.64e-10	FALSE	2.03686	0.0282989	UP	5.32086	6.72e-17	UP	2.82363	3.41e-07	UP	4.80554	2e-13
Cluster-11149.26832	86.04	147.7	220.5	6.48	4.05	1387	747075606	XP_011084845.1	408	4.9e-37	uroporphyrinogen decarboxylase [Sesamum indicum]	XM_011086543.2	XM_011086543	182	1.08e-87	PREDICTED: Sesamum indicum uroporphyrinogen decarboxylase (LOC105166996), mRNA	K01599	hemE, UROD	uroporphyrinogen decarboxylase	http://www.genome.jp/dbget-bin/www_bget?ko:K01599	Q42967	394	7.9e-37	Uroporphyrinogen decarboxylase, chloroplastic OS=Nicotiana tabacum OX=4097 GN=DCUP PE=1 SV=1	PF01208	Uroporphyrinogen decarboxylase (URO-D)	GO:0015994//GO:0006779	chlorophyll metabolic process//porphyrin-containing compound biosynthetic process	GO:0004853	uroporphyrinogen decarboxylase activity	--	--	KOG2872	Uroporphyrinogen decarboxylase	UP	4.71316	3.79e-20	FALSE	0.280631	0.829394	UP	4.88287	2.45e-21	UP	4.40176	4.48e-18	UP	4.63211	1.58e-19
Cluster-11149.26835	107.12	183.34	246.52	8.89	4.65	1565	747075606	XP_011084845.1	1067	2.1e-113	uroporphyrinogen decarboxylase [Sesamum indicum]	KY538183.1	KY538183	389	0	Phelipanche aegyptiaca AT2G40490 mRNA, partial sequence	K01599	hemE, UROD	uroporphyrinogen decarboxylase	http://www.genome.jp/dbget-bin/www_bget?ko:K01599	Q42967	1017	5.1e-109	Uroporphyrinogen decarboxylase, chloroplastic OS=Nicotiana tabacum OX=4097 GN=DCUP PE=1 SV=1	PF01208//PF10171	Uroporphyrinogen decarboxylase (URO-D)//Translocase of the Inner Mitochondrial membrane 29	GO:0006779//GO:0015994	porphyrin-containing compound biosynthetic process//chlorophyll metabolic process	GO:0004853	uroporphyrinogen decarboxylase activity	GO:0042721	TIM22 mitochondrial import inner membrane insertion complex	KOG2872	Uroporphyrinogen decarboxylase	UP	4.56839	1.85e-19	FALSE	0.539009	0.504073	UP	4.99652	2.74e-22	UP	4.26305	2.04e-17	UP	4.75184	1.59e-20
Cluster-11149.29009	32.57	79.11	83.56	6.76	2.47	1903	1173777024	XP_020554530.1	1677	4.8e-184	uroporphyrinogen decarboxylase 1, chloroplastic [Sesamum indicum]	XM_020698871.1	XM_020698871	671	0	PREDICTED: Sesamum indicum uroporphyrinogen decarboxylase 1, chloroplastic (LOC105176937), mRNA	K01599	hemE, UROD	uroporphyrinogen decarboxylase	http://www.genome.jp/dbget-bin/www_bget?ko:K01599	Q93ZB6	1427	1.8e-156	Uroporphyrinogen decarboxylase 1, chloroplastic OS=Arabidopsis thaliana OX=3702 GN=HEME1 PE=2 SV=2	PF01208	Uroporphyrinogen decarboxylase (URO-D)	GO:0006779//GO:0015994	porphyrin-containing compound biosynthetic process//chlorophyll metabolic process	GO:0004853	uroporphyrinogen decarboxylase activity	--	--	KOG2872	Uroporphyrinogen decarboxylase	UP	3.74953	3.42e-14	FALSE	1.0545	0.0858176	UP	4.69312	5.83e-20	UP	2.94159	1.85e-09	UP	3.94576	5e-15
Cluster-11149.39238	4.79	8.85	18.28	1.32	0.57	475	1173777024	XP_020554530.1	243	2.3e-18	uroporphyrinogen decarboxylase 1, chloroplastic [Sesamum indicum]	XM_022992723.1	XM_022992723	84	1.06e-33	PREDICTED: Olea europaea var. sylvestris uroporphyrinogen decarboxylase 1, chloroplastic-like (LOC111370830), mRNA	K01599	hemE, UROD	uroporphyrinogen decarboxylase	http://www.genome.jp/dbget-bin/www_bget?ko:K01599	Q93ZB6	184	6e-13	Uroporphyrinogen decarboxylase 1, chloroplastic OS=Arabidopsis thaliana OX=3702 GN=HEME1 PE=2 SV=2	--	--	--	--	--	--	--	--	--	--	UP	2.95583	0.00014987	FALSE	0.776536	1	UP	3.61789	6.9e-05	FALSE	2.48995	0.0050781	UP	3.20724	0.00160521
Cluster-11149.29359	31.7	29.9	51.6	3	2.64	871	747054381	XP_011073395.1	1137	9.1e-122	uncharacterized protein LOC105158360 [Sesamum indicum]	XM_011075093.2	XM_011075093	552	0	PREDICTED: Sesamum indicum haloalkane dehalogenase (LOC105158360), mRNA	-	-	-	http://www.genome.jp/dbget-bin/www_bget?ko:-	Q8PDW8	188	3.8e-13	Cis-3-alkyl-4-alkyloxetan-2-one decarboxylase OS=Xanthomonas campestris pv. campestris (strain ATCC 33913 / DSM 3586 / NCPPB 528 / LMG 568 / P 25) OX=190485 GN=oleB PE=1 SV=1	--	--	--	--	--	--	--	--	--	--	UP	3.5215	4.05e-11	FALSE	-0.212501	0.995286	UP	3.19782	9.54e-10	UP	4.06374	2.6e-14	UP	3.80061	7.5e-13
Cluster-11149.13132	0.64	0.8	1.06	0.19	0.07	913	743901528	XP_011044086.1	154	9.2e-08	PREDICTED: uroporphyrinogen decarboxylase 1, chloroplastic isoform X2 [Populus euphratica]	XM_023021608.1	XM_023021608	62	3.58e-21	PREDICTED: Olea europaea var. sylvestris uroporphyrinogen decarboxylase 1, chloroplastic-like (LOC111395569), mRNA	K01599	hemE, UROD	uroporphyrinogen decarboxylase	http://www.genome.jp/dbget-bin/www_bget?ko:K01599	Q93ZB6	132	1.2e-06	Uroporphyrinogen decarboxylase 1, chloroplastic OS=Arabidopsis thaliana OX=3702 GN=HEME1 PE=2 SV=2	--	--	--	--	--	--	--	--	--	--	FALSE	2.21336	0.167737	FALSE	1.08131	0.909352	FALSE	3.17498	0.039355	FALSE	2.35788	0.108574	FALSE	3.36199	0.0411845
Cluster-11149.22094	30.39	55.42	52.88	30.55	5.3	1406	747104184	XP_011100315.1	374	4.4e-33	cysteine proteinase inhibitor 1-like [Sesamum indicum]	XM_011102014.2	XM_011102014	101	1.17e-42	PREDICTED: Sesamum indicum cysteine proteinase inhibitor 1-like (LOC105178524), mRNA	-	-	-	http://www.genome.jp/dbget-bin/www_bget?ko:-	Q41916	286	2.7e-24	Cysteine proteinase inhibitor 5 OS=Arabidopsis thaliana OX=3702 GN=CYS5 PE=2 SV=2	PF06305//PF16845//PF08496//PF04277//PF01914//PF10278//PF00031	Lipopolysaccharide assembly protein A domain//Aspartic acid proteinase inhibitor//Peptidase family S49 N-terminal//Oxaloacetate decarboxylase, gamma chain//MarC family integral membrane protein//Mediator of RNA pol II transcription subunit 19//Cystatin domain	GO:0006357//GO:0006560//GO:0006814//GO:0006525//GO:0036376//GO:0006090	regulation of transcription by RNA polymerase II//proline metabolic process//sodium ion transport//arginine metabolic process//sodium ion export across plasma membrane//pyruvate metabolic process	GO:0004252//GO:0004869//GO:0003712//GO:0015081//GO:0008948	serine-type endopeptidase activity//cysteine-type endopeptidase inhibitor activity//transcription coregulator activity//sodium ion transmembrane transporter activity//oxaloacetate decarboxylase activity	GO:0005887//GO:0016592//GO:0005667//GO:0016021//GO:0016020//GO:0005886	integral component of plasma membrane//mediator complex//transcription regulator complex//integral component of membrane//membrane//plasma membrane	--	--	FALSE	1.06338	0.0613254	UP	2.12878	2.38e-05	UP	3.08132	2.33e-10	FALSE	0.665315	0.321224	UP	2.74387	1.85e-08
Cluster-11149.25289	28.84	31.9	40.33	7.77	4.51	1243	1139795881	ONI28499.1	627	1.8e-62	hypothetical protein PRUPE_1G144100 [Prunus persica]	MK035041.1	MK035041	242	4.27e-121	Scutellaria barbata 1-deoxy-D-xylulose-5-phosphate synthase decarboxylase (DXS5) mRNA, complete cds	-	-	-	http://www.genome.jp/dbget-bin/www_bget?ko:-	O78328	534	4.1e-53	Probable 1-deoxy-D-xylulose-5-phosphate synthase, chloroplastic OS=Capsicum annuum OX=4072 GN=TKT2 PE=2 SV=1	PF00676//PF13292//PF02775	Dehydrogenase E1 component//1-deoxy-D-xylulose-5-phosphate synthase//Thiamine pyrophosphate enzyme, C-terminal TPP binding domain	GO:0006694//GO:0016114	steroid biosynthetic process//terpenoid biosynthetic process	GO:0008661//GO:0030976//GO:0016624//GO:0003824	1-deoxy-D-xylulose-5-phosphate synthase activity//thiamine pyrophosphate binding//oxidoreductase activity, acting on the aldehyde or oxo group of donors, disulfide as acceptor//catalytic activity	--	--	--	--	UP	2.242	7.38e-06	FALSE	0.386534	0.7074	UP	2.51765	3.08e-07	UP	2.56313	2.38e-07	UP	2.89941	4.18e-09
Cluster-11149.20148	23.81	75.2	82.65	12.9	11.26	1357	747059782	XP_011076289.1	970	3.3e-102	ATP-dependent Clp protease ATP-binding subunit CLPT1, chloroplastic [Sesamum indicum]	XM_012996811.1	XM_012996811	357	0	PREDICTED: Erythranthe guttatus clp protease-related protein At4g12060, chloroplastic-like (LOC105971890), mRNA	-	-	-	http://www.genome.jp/dbget-bin/www_bget?ko:-	Q93WL3	582	1.2e-58	ATP-dependent Clp protease ATP-binding subunit CLPT1, chloroplastic OS=Arabidopsis thaliana OX=3702 GN=CLPT1 PE=1 SV=1	PF03709	Orn/Lys/Arg decarboxylase, N-terminal domain	--	--	GO:0016831	carboxy-lyase activity	--	--	--	--	UP	2.74751	1.67e-08	FALSE	-0.201002	0.920412	UP	2.43568	3.12e-07	UP	1.55646	0.00261504	FALSE	1.30541	0.00984351
Cluster-11149.8166	5.73	2.12	2.9	1.06	0.45	1206	747073768	XP_011083855.1	717	6.3e-73	BRI1 kinase inhibitor 1-like [Sesamum indicum]	XM_022989410.1	XM_022989410	96	5.99e-40	PREDICTED: Olea europaea var. sylvestris BRI1 kinase inhibitor 1-like (LOC111368168), mRNA	K14499	BKI1	BRI1 kinase inhibitor 1	http://www.genome.jp/dbget-bin/www_bget?ko:K14499	Q9FMZ0	342	7.3e-31	BRI1 kinase inhibitor 1 OS=Arabidopsis thaliana OX=3702 GN=BKI1 PE=1 SV=1	PF04277	Oxaloacetate decarboxylase, gamma chain	GO:0006090//GO:0006814//GO:0006525//GO:0036376//GO:0006560	pyruvate metabolic process//sodium ion transport//arginine metabolic process//sodium ion export across plasma membrane//proline metabolic process	GO:0015081//GO:0008948	sodium ion transmembrane transporter activity//oxaloacetate decarboxylase activity	GO:0016020	membrane	--	--	FALSE	1.19789	0.156071	FALSE	0.831656	0.561425	FALSE	1.91814	0.00989512	UP	3.0974	1.18e-07	UP	3.87604	1.01e-09
Cluster-11149.9399	1.06	3.39	3.64	3	0.61	533	--	--	--	--	--	--	--	--	--	--	--	--	--	--	--	--	--	--	PF03908//PF04277	Sec20//Oxaloacetate decarboxylase, gamma chain	GO:0006814//GO:0006090//GO:0006810//GO:0006890//GO:0036376//GO:0006560//GO:0006525	sodium ion transport//pyruvate metabolic process//transport//retrograde vesicle-mediated transport, Golgi to endoplasmic reticulum//sodium ion export across plasma membrane//proline metabolic process//arginine metabolic process	GO:0005484//GO:0008948//GO:0015081	SNAP receptor activity//oxaloacetate decarboxylase activity//sodium ion transmembrane transporter activity	GO:0005622//GO:0016020	intracellular//membrane	--	--	FALSE	0.399038	0.903169	FALSE	1.86959	0.126958	FALSE	2.15656	0.0514783	FALSE	-0.826675	0.655951	FALSE	0.988239	0.800906
Cluster-11149.16188	3.88	8.94	7.7	5.7	1.31	1856	747106259	XP_011101419.1	1278	8.6e-138	receptor-like protein 51 [Sesamum indicum]	XM_011103117.2	XM_011103117	755	0	PREDICTED: Sesamum indicum receptor-like protein 51 (LOC105179482), mRNA	-	-	-	http://www.genome.jp/dbget-bin/www_bget?ko:-	Q9SN38	723	7.5e-75	Receptor-like protein 51 OS=Arabidopsis thaliana OX=3702 GN=RLP51 PE=1 SV=1	PF13516//PF04277//PF00560//PF15168//PF13855	Leucine Rich repeat//Oxaloacetate decarboxylase, gamma chain//Leucine Rich Repeat//Triple QxxK/R motif-containing protein family//Leucine rich repeat	GO:0006814//GO:0006090//GO:0006525//GO:0036376//GO:0006560	sodium ion transport//pyruvate metabolic process//arginine metabolic process//sodium ion export across plasma membrane//proline metabolic process	GO:0005515//GO:0008948//GO:0015081	protein binding//oxaloacetate decarboxylase activity//sodium ion transmembrane transporter activity	GO:0005789//GO:0016020	endoplasmic reticulum membrane//membrane	--	--	FALSE	0.850683	0.188863	UP	1.72001	0.00274984	UP	2.45977	2.06e-06	FALSE	0.117326	1	UP	1.78679	0.00113914
Cluster-11149.24522	83.06	135.6	134.68	62.54	24.09	2013	1276251721	PIN10332.1	1892	6e-209	dTDP-glucose 4-6-dehydratase/UDP-glucuronic acid decarboxylase [Handroanthus impetiginosus]	XM_011075172.2	XM_011075172	769	0	PREDICTED: Sesamum indicum GDP-mannose 3,5-epimerase 2 (LOC105158417), mRNA	K10046	GME	GDP-D-mannose 3', 5'-epimerase [EC:5.1.3.18 5.1.3.-]	http://www.genome.jp/dbget-bin/www_bget?ko:K10046	Q2R1V8	1842	1.4e-204	GDP-mannose 3,5-epimerase 2 OS=Oryza sativa subsp. japonica OX=39947 GN=GME-2 PE=2 SV=2	PF01073//PF01370	3-beta hydroxysteroid dehydrogenase/isomerase family//NAD dependent epimerase/dehydratase family	GO:0055114//GO:0008207//GO:0006694//GO:0008210//GO:0008209	oxidation-reduction process//C21-steroid hormone metabolic process//steroid biosynthetic process//estrogen metabolic process//androgen metabolic process	GO:0003854//GO:0003824//GO:0016616//GO:0050662	3-beta-hydroxy-delta5-steroid dehydrogenase activity//catalytic activity//oxidoreductase activity, acting on the CH-OH group of donors, NAD or NADP as acceptor//obsolete coenzyme binding	--	--	KOG1429	dTDP-glucose 4-6-dehydratase/UDP-glucuronic acid decarboxylase	FALSE	1.31837	0.0120236	FALSE	0.98012	0.0810008	UP	2.1877	3.09e-06	FALSE	1.08379	0.0474184	UP	2.01388	2.05e-05
Cluster-11149.29765	5.77	13	11.95	4.08	2.33	2184	747062336	XP_011077673.1	1956	2.5e-216	uncharacterized protein LOC105161631 [Sesamum indicum]	XM_011079371.2	XM_011079371	792	0	PREDICTED: Sesamum indicum arginine decarboxylase-like (LOC105161631), mRNA	-	-	-	http://www.genome.jp/dbget-bin/www_bget?ko:-	Q9K9K5	631	4.1e-64	Arginine decarboxylase OS=Bacillus halodurans (strain ATCC BAA-125 / DSM 18197 / FERM 7344 / JCM 9153 / C-125) OX=272558 GN=speA PE=3 SV=1	PF00282//PF05889//PF01212//PF00155//PF01053//PF01276//PF03711	Pyridoxal-dependent decarboxylase conserved domain//O-phosphoseryl-tRNA(Sec) selenium transferase, SepSecS//Beta-eliminating lyase//Aminotransferase class I and II//Cys/Met metabolism PLP-dependent enzyme//Orn/Lys/Arg decarboxylase, major domain//Orn/Lys/Arg decarboxylase, C-terminal domain	GO:0019346//GO:0009058//GO:0006520//GO:0019752	transsulfuration//biosynthetic process//cellular amino acid metabolic process//carboxylic acid metabolic process	GO:0016831//GO:0016740//GO:0003824//GO:0030170//GO:0016829	carboxy-lyase activity//transferase activity//catalytic activity//pyridoxal phosphate binding//lyase activity	--	--	--	--	UP	1.8736	0.000251274	FALSE	0.40764	0.685044	UP	2.17037	1.19e-05	FALSE	1.17612	0.0394017	UP	1.53357	0.00313934
Cluster-11149.20817	17.58	42.62	26.23	13.99	5.37	3076	1024013970	KZV34851.1	1848	1.2e-203	putative pectate lyase 8 [Dorcoceras hygrometricum]	XM_011075461.2	XM_011075461	811	0	PREDICTED: Sesamum indicum probable pectate lyase 8 (LOC105158641), mRNA	K01728	pel	pectate lyase	http://www.genome.jp/dbget-bin/www_bget?ko:K01728	Q940Q1	1704	2.2e-188	Probable pectate lyase 1 OS=Arabidopsis thaliana OX=3702 GN=At1g04680 PE=2 SV=2	PF06699//PF01040//PF00001//PF02366//PF03824//PF04277	GPI biosynthesis protein family Pig-F//UbiA prenyltransferase family//7 transmembrane receptor (rhodopsin family)//Dolichyl-phosphate-mannose-protein mannosyltransferase//High-affinity nickel-transport protein//Oxaloacetate decarboxylase, gamma chain	GO:0036376//GO:0006525//GO:0007186//GO:0035444//GO:0006506//GO:0006090//GO:0006493//GO:0006560//GO:0015675//GO:0006814	sodium ion export across plasma membrane//arginine metabolic process//G protein-coupled receptor signaling pathway//nickel cation transmembrane transport//GPI anchor biosynthetic process//pyruvate metabolic process//protein O-linked glycosylation//proline metabolic process//nickel cation transport//sodium ion transport	GO:0004930//GO:0008948//GO:0015081//GO:0000030//GO:0015099//GO:0016765	G protein-coupled receptor activity//oxaloacetate decarboxylase activity//sodium ion transmembrane transporter activity//mannosyltransferase activity//nickel cation transmembrane transporter activity//transferase activity, transferring alkyl or aryl (other than methyl) groups	GO:0000136//GO:0005789//GO:0016020//GO:0016021//GO:0005887	alpha-1,6-mannosyltransferase complex//endoplasmic reticulum membrane//membrane//integral component of membrane//integral component of plasma membrane	--	--	UP	1.80764	0.000269742	FALSE	0.985137	0.0871279	UP	2.68196	1.62e-08	FALSE	1.00539	0.0760707	UP	1.94045	5.42e-05
Cluster-11149.37375	3.62	10.01	14.96	7.6	3.17	2365	747078218	XP_011086265.1	546	8.4e-53	acyl carrier protein 3, mitochondrial [Sesamum indicum]	XM_011087963.2	XM_011087963	271	6.23e-137	PREDICTED: Sesamum indicum acyl carrier protein 3, mitochondrial (LOC105168049), transcript variant X1, mRNA	K03955	NDUFAB1	NADH dehydrogenase (ubiquinone) 1 alpha/beta subcomplex 1	http://www.genome.jp/dbget-bin/www_bget?ko:K03955	Q9FGJ4	324	1.8e-28	Acyl carrier protein 3, mitochondrial OS=Arabidopsis thaliana OX=3702 GN=MTACP2 PE=1 SV=1	PF03186	CobD/Cbib protein	GO:0009236	cobalamin biosynthetic process	GO:0048472	threonine-phosphate decarboxylase activity	GO:0016021	integral component of membrane	KOG1748	Acyl carrier protein/NADH-ubiquinone oxidoreductase, NDUFAB1/SDAP subunit	FALSE	0.599867	0.41384	FALSE	0.863266	0.166035	FALSE	1.35233	0.00823602	FALSE	-0.394447	0.715601	FALSE	0.41876	0.563381
Cluster-11149.34244	4.03	5.31	7.31	3.7	1.69	1244	1562639814	RXH80239.1	349	3.1e-30	hypothetical protein DVH24_041386 [Malus domestica]	XM_012976507.1	XM_012976507	124	1.68e-55	PREDICTED: Erythranthe guttatus UDP-glucuronic acid decarboxylase 1 (LOC105952913), mRNA	K08678	UXS1, uxs	UDP-glucuronate decarboxylase	http://www.genome.jp/dbget-bin/www_bget?ko:K08678	Q8VZC0	323	1.2e-28	UDP-glucuronic acid decarboxylase 1 OS=Arabidopsis thaliana OX=3702 GN=UXS1 PE=1 SV=1	PF01370//PF07127	NAD dependent epimerase/dehydratase family//Late nodulin protein	GO:0009878	nodule morphogenesis	GO:0003824//GO:0050662//GO:0046872	catalytic activity//obsolete coenzyme binding//metal ion binding	--	--	KOG1429	dTDP-glucose 4-6-dehydratase/UDP-glucuronic acid decarboxylase	FALSE	0.726962	0.356715	FALSE	0.731693	0.401501	FALSE	1.34779	0.0210321	FALSE	0.794906	0.26999	FALSE	1.47607	0.0129647
Cluster-11149.24346	77.62	161.2	148.94	70.93	35.3	1929	1276256316	PIN14036.1	2322	7.8e-259	Ornithine decarboxylase [Handroanthus impetiginosus]	XM_011094507.2	XM_011094507	984	0	PREDICTED: Sesamum indicum diaminopimelate decarboxylase 1, chloroplastic (LOC105172901), mRNA	K01586	lysA	diaminopimelate decarboxylase	http://www.genome.jp/dbget-bin/www_bget?ko:K01586	Q949X7	2049	1.4e-228	Diaminopimelate decarboxylase 1, chloroplastic OS=Arabidopsis thaliana OX=3702 GN=LYSA1 PE=1 SV=1	PF02784//PF03340//PF00278	Pyridoxal-dependent decarboxylase, pyridoxal binding domain//Poxvirus rifampicin resistance protein//Pyridoxal-dependent decarboxylase, C-terminal sheet domain	GO:0046677	response to antibiotic	GO:0003824	catalytic activity	--	--	--	--	FALSE	1.38652	0.00751013	FALSE	0.609956	0.361027	UP	1.88569	6.18e-05	FALSE	0.804484	0.181924	FALSE	1.36442	0.00526179
Cluster-11149.10828	16.76	13.46	21.29	15.26	5.28	667	747093942	XP_011094795.1	671	7.6e-68	UDP-glucuronic acid decarboxylase 1 [Sesamum indicum]	XM_011096493.2	XM_011096493	254	4.77e-128	PREDICTED: Sesamum indicum UDP-glucuronic acid decarboxylase 1 (LOC105174398), mRNA	K08678	UXS1, uxs	UDP-glucuronate decarboxylase	http://www.genome.jp/dbget-bin/www_bget?ko:K08678	Q8VZC0	513	6e-51	UDP-glucuronic acid decarboxylase 1 OS=Arabidopsis thaliana OX=3702 GN=UXS1 PE=1 SV=1	PF01073//PF01370	3-beta hydroxysteroid dehydrogenase/isomerase family//NAD dependent epimerase/dehydratase family	GO:0008207//GO:0055114//GO:0008209//GO:0008210//GO:0006694	C21-steroid hormone metabolic process//oxidation-reduction process//androgen metabolic process//estrogen metabolic process//steroid biosynthetic process	GO:0016616//GO:0003824//GO:0003854//GO:0050662	oxidoreductase activity, acting on the CH-OH group of donors, NAD or NADP as acceptor//catalytic activity//3-beta-hydroxy-delta5-steroid dehydrogenase activity//obsolete coenzyme binding	--	--	KOG1429	dTDP-glucose 4-6-dehydratase/UDP-glucuronic acid decarboxylase	FALSE	0.0350598	1	FALSE	1.13011	0.0828464	FALSE	1.05439	0.0749111	FALSE	0.798565	0.236831	UP	1.87818	0.000513143
Cluster-11149.37591	5.98	5.3	8.37	7.84	2.5	526	1600650898	TEY34060.1	547	1.4e-53	UDP-glucuronate decarboxylase [Salvia splendens]	XM_011096493.2	XM_011096493	276	2.18e-140	PREDICTED: Sesamum indicum UDP-glucuronic acid decarboxylase 1 (LOC105174398), mRNA	K08678	UXS1, uxs	UDP-glucuronate decarboxylase	http://www.genome.jp/dbget-bin/www_bget?ko:K08678	Q8VZC0	518	1.2e-51	UDP-glucuronic acid decarboxylase 1 OS=Arabidopsis thaliana OX=3702 GN=UXS1 PE=1 SV=1	--	--	--	--	--	--	--	--	KOG1429	dTDP-glucose 4-6-dehydratase/UDP-glucuronic acid decarboxylase	FALSE	-0.336118	0.877088	FALSE	1.24077	0.144338	FALSE	0.794081	0.400099	FALSE	0.265965	0.958261	FALSE	1.45536	0.0553355
Cluster-11149.23603	116.27	135.33	173.13	161.42	53.29	1490	1276238980	PIN00981.1	1578	1.1e-172	dTDP-glucose 4-6-dehydratase/UDP-glucuronic acid decarboxylase [Handroanthus impetiginosus]	XM_011090520.2	XM_011090520	698	0	PREDICTED: Sesamum indicum UDP-D-apiose/UDP-D-xylose synthase 2 (LOC105169967), mRNA	-	-	-	http://www.genome.jp/dbget-bin/www_bget?ko:-	Q9SGE0	1519	3e-167	UDP-D-apiose/UDP-D-xylose synthase 2 OS=Arabidopsis thaliana OX=3702 GN=AXS2 PE=2 SV=1	PF01073//PF01370//PF03721//PF03435	3-beta hydroxysteroid dehydrogenase/isomerase family//NAD dependent epimerase/dehydratase family//UDP-glucose/GDP-mannose dehydrogenase family, NAD binding domain//Saccharopine dehydrogenase NADP binding domain	GO:0008209//GO:0006694//GO:0008210//GO:0008207//GO:0055114	androgen metabolic process//steroid biosynthetic process//estrogen metabolic process//C21-steroid hormone metabolic process//oxidation-reduction process	GO:0050662//GO:0003824//GO:0016616//GO:0051287//GO:0016491//GO:0003854	obsolete coenzyme binding//catalytic activity//oxidoreductase activity, acting on the CH-OH group of donors, NAD or NADP as acceptor//NAD binding//oxidoreductase activity//3-beta-hydroxy-delta5-steroid dehydrogenase activity	--	--	KOG1429	dTDP-glucose 4-6-dehydratase/UDP-glucuronic acid decarboxylase	FALSE	-0.0506216	1	FALSE	1.20197	0.0234343	FALSE	1.04056	0.0376684	FALSE	0.199714	0.936045	FALSE	1.35166	0.00575434
Cluster-11149.23806	65.22	125.82	105.03	77.79	35.24	3037	920714996	KOM55084.1	1014	5.8e-107	hypothetical protein LR48_Vigan10g097600 [Vigna angularis]	XM_011092781.2	XM_011092781	369	0	PREDICTED: Sesamum indicum GDP-mannose 3,5-epimerase 2-like (LOC105171617), mRNA	K10046	GME	GDP-D-mannose 3', 5'-epimerase [EC:5.1.3.18 5.1.3.-]	http://www.genome.jp/dbget-bin/www_bget?ko:K10046	Q2R1V8	960	4e-102	GDP-mannose 3,5-epimerase 2 OS=Oryza sativa subsp. japonica OX=39947 GN=GME-2 PE=2 SV=2	PF06221//PF01370//PF01073	Putative zinc finger motif, C2HC5-type//NAD dependent epimerase/dehydratase family//3-beta hydroxysteroid dehydrogenase/isomerase family	GO:0006694//GO:0008210//GO:0008209//GO:0006355//GO:0055114//GO:0008207	steroid biosynthetic process//estrogen metabolic process//androgen metabolic process//regulation of transcription, DNA-templated//oxidation-reduction process//C21-steroid hormone metabolic process	GO:0008270//GO:0050662//GO:0003854//GO:0016616//GO:0003824	zinc ion binding//obsolete coenzyme binding//3-beta-hydroxy-delta5-steroid dehydrogenase activity//oxidoreductase activity, acting on the CH-OH group of donors, NAD or NADP as acceptor//catalytic activity	GO:0005634	nucleus	KOG1429	dTDP-glucose 4-6-dehydratase/UDP-glucuronic acid decarboxylase	FALSE	0.893893	0.132147	FALSE	0.746575	0.226552	UP	1.52968	0.00137662	FALSE	0.421546	0.62591	FALSE	1.1181	0.0246955
Cluster-11149.19174	4.99	8.58	6.62	5.1	2.55	1081	604301000	EYU20720.1	681	8.5e-69	hypothetical protein MIMGU_mgv1a015466mg [Erythranthe guttata]	XM_013002030.1	XM_013002030	280	2.78e-142	PREDICTED: Erythranthe guttatus protein cornichon homolog 1 (LOC105976764), transcript variant X2, mRNA	K20368	CNIH, ERV14	protein cornichon	http://www.genome.jp/dbget-bin/www_bget?ko:K20368	Q9C7D7	376	7.5e-35	Protein cornichon homolog 1 OS=Arabidopsis thaliana OX=3702 GN=At3g12180 PE=2 SV=1	PF04277//PF03311	Oxaloacetate decarboxylase, gamma chain//Cornichon protein	GO:0036376//GO:0006560//GO:0006525//GO:0006090//GO:0006814//GO:0016192	sodium ion export across plasma membrane//proline metabolic process//arginine metabolic process//pyruvate metabolic process//sodium ion transport//vesicle-mediated transport	GO:0015081//GO:0008948	sodium ion transmembrane transporter activity//oxaloacetate decarboxylase activity	GO:0016020	membrane	KOG2729	ER vesicle integral membrane protein involved in establishing cell polarity, signaling and protein degradation	FALSE	0.955495	0.149508	FALSE	0.600429	0.488525	FALSE	1.44506	0.00923724	FALSE	0.637326	0.428958	FALSE	1.1874	0.051636
Cluster-11149.37411	7.26	11.9	20.17	8.15	7.81	720	848862356	XP_012831961.1	545	3.3e-53	PREDICTED: UDP-glucuronic acid decarboxylase 1 [Erythranthe guttata]	XM_011096493.2	XM_011096493	291	1.4e-148	PREDICTED: Sesamum indicum UDP-glucuronic acid decarboxylase 1 (LOC105174398), mRNA	K08678	UXS1, uxs	UDP-glucuronate decarboxylase	http://www.genome.jp/dbget-bin/www_bget?ko:K08678	Q8VZC0	521	7.7e-52	UDP-glucuronic acid decarboxylase 1 OS=Arabidopsis thaliana OX=3702 GN=UXS1 PE=1 SV=1	--	--	--	--	--	--	--	--	KOG1429	dTDP-glucose 4-6-dehydratase/UDP-glucuronic acid decarboxylase	FALSE	0.759313	0.313382	FALSE	-0.336749	0.796404	FALSE	0.311821	0.722693	FALSE	0.498261	0.629273	FALSE	0.111576	1
Cluster-11149.18396	20.27	47.11	44.33	22.44	18.59	1175	747101929	XP_011099109.1	971	2.2e-102	CBS domain-containing protein CBSX1, chloroplastic [Sesamum indicum]	XM_011100807.2	XM_011100807	433	0	PREDICTED: Sesamum indicum CBS domain-containing protein CBSX1, chloroplastic (LOC105177599), mRNA	-	-	-	http://www.genome.jp/dbget-bin/www_bget?ko:-	O23193	753	1.6e-78	CBS domain-containing protein CBSX1, chloroplastic OS=Arabidopsis thaliana OX=3702 GN=CBSX1 PE=1 SV=2	PF02100	Ornithine decarboxylase antizyme	GO:0019467	ornithine catabolic process, by decarboxylation	GO:0008073	ornithine decarboxylase inhibitor activity	--	--	--	--	FALSE	1.27538	0.018359	FALSE	-0.125279	1	FALSE	1.03931	0.0418594	FALSE	0.524203	0.506526	FALSE	0.348914	0.641324
Cluster-11149.24032	227.13	311.44	257.87	155.58	114.81	2626	747082360	XP_011088497.1	2979	0	arginine decarboxylase [Sesamum indicum]	XM_011090195.2	XM_011090195	1243	0	PREDICTED: Sesamum indicum arginine decarboxylase (LOC105169707), mRNA	K01583	E4.1.1.19	arginine decarboxylase	http://www.genome.jp/dbget-bin/www_bget?ko:K01583	Q43075	2394	1.8e-268	Arginine decarboxylase OS=Pisum sativum OX=3888 PE=2 SV=1	PF02784	Pyridoxal-dependent decarboxylase, pyridoxal binding domain	--	--	GO:0003824	catalytic activity	--	--	--	--	FALSE	1.20213	0.0253833	FALSE	0.0422099	1	FALSE	1.13356	0.0217425	FALSE	1.22139	0.020306	FALSE	1.21358	0.0140384
Cluster-11149.20716	8.68	11.16	9.5	7.4	4.33	1938	747066861	XP_011080126.1	1918	5.5e-212	tyrosine decarboxylase 1 [Sesamum indicum]	XM_011081824.2	XM_011081824	872	0	PREDICTED: Sesamum indicum tyrosine decarboxylase 1 (LOC105163472), mRNA	K01592	E4.1.1.25	tyrosine decarboxylase	http://www.genome.jp/dbget-bin/www_bget?ko:K01592	Q8RY79	1646	7.3e-182	Tyrosine decarboxylase 1 OS=Arabidopsis thaliana OX=3702 GN=ELI5 PE=1 SV=1	PF00282	Pyridoxal-dependent decarboxylase conserved domain	GO:0019752	carboxylic acid metabolic process	GO:0030170//GO:0016831	pyridoxal phosphate binding//carboxy-lyase activity	--	--	KOG0628	Aromatic-L-amino-acid/L-histidine decarboxylase	FALSE	0.795642	0.224249	FALSE	0.375207	0.70386	FALSE	1.06005	0.0433853	FALSE	0.904111	0.137181	FALSE	1.22921	0.0189092
Cluster-11149.34243	10.01	10.31	20.64	11.91	9.41	585	1347704959	PPS03565.1	307	1.1e-25	hypothetical protein GOBAR_AA17111 [Gossypium barbadense]	XM_011096493.2	XM_011096493	128	4.58e-58	PREDICTED: Sesamum indicum UDP-glucuronic acid decarboxylase 1 (LOC105174398), mRNA	K08678	UXS1, uxs	UDP-glucuronate decarboxylase	http://www.genome.jp/dbget-bin/www_bget?ko:K08678	Q8VZC0	287	8.5e-25	UDP-glucuronic acid decarboxylase 1 OS=Arabidopsis thaliana OX=3702 GN=UXS1 PE=1 SV=1	PF01370	NAD dependent epimerase/dehydratase family	--	--	GO:0003824//GO:0050662	catalytic activity//obsolete coenzyme binding	--	--	KOG1429	dTDP-glucose 4-6-dehydratase/UDP-glucuronic acid decarboxylase	FALSE	0.013083	1	FALSE	-0.0597947	1	FALSE	-0.157308	0.955284	FALSE	0.409515	0.755401	FALSE	0.299709	0.755943
Cluster-11149.4688	2.09	2.16	1.77	2	0.69	1369	--	--	--	--	--	--	--	--	--	--	--	--	--	--	--	--	--	--	PF02537//PF04277	CrcB-like protein, Camphor Resistance (CrcB)//Oxaloacetate decarboxylase, gamma chain	GO:0006560//GO:0036376//GO:0006525//GO:0006814//GO:0006090	proline metabolic process//sodium ion export across plasma membrane//arginine metabolic process//sodium ion transport//pyruvate metabolic process	GO:0008948//GO:0015081	oxaloacetate decarboxylase activity//sodium ion transmembrane transporter activity	GO:0016020//GO:0016021	membrane//integral component of membrane	--	--	FALSE	0.316356	0.880733	FALSE	1.1335	0.175331	FALSE	1.33897	0.0614368	FALSE	0.73106	0.378269	FALSE	1.8132	0.00560591
Cluster-11149.22236	0	0.72	2.67	0.95	0.62	741	--	--	--	--	--	--	--	--	--	--	--	--	--	--	--	--	--	--	PF04277	Oxaloacetate decarboxylase, gamma chain	GO:0006090//GO:0006814//GO:0006525//GO:0006560//GO:0036376	pyruvate metabolic process//sodium ion transport//arginine metabolic process//proline metabolic process//sodium ion export across plasma membrane	GO:0015081//GO:0008948	sodium ion transmembrane transporter activity//oxaloacetate decarboxylase activity	GO:0016020	membrane	--	--	FALSE	-0.192959	1	FALSE	0.224265	1	FALSE	-0.0775868	1	FALSE	-6.17945	0.0382676	FALSE	-5.73599	0.0636174
Cluster-14302.0	0	1.15	0.49	0.37	0.2	1979	1527614854	XP_027081023.1	1751	1.3e-192	uncharacterized protein LOC113703745 [Coffea arabica]	--	--	--	--	--	-	-	-	http://www.genome.jp/dbget-bin/www_bget?ko:-	P14381	459	3.3e-44	Transposon TX1 uncharacterized 149 kDa protein OS=Xenopus laevis OX=8355 PE=4 SV=1	PF04277	Oxaloacetate decarboxylase, gamma chain	GO:0006814//GO:0006090//GO:0006560//GO:0036376//GO:0006525	sodium ion transport//pyruvate metabolic process//proline metabolic process//sodium ion export across plasma membrane//arginine metabolic process	GO:0008948//GO:0015081	oxaloacetate decarboxylase activity//sodium ion transmembrane transporter activity	GO:0016020	membrane	--	--	FALSE	1.83945	0.0132456	FALSE	0.476835	0.881992	UP	2.20442	0.00438594	FALSE	-6.62159	0.00968287	FALSE	-5.92525	0.0393902
Cluster-11149.22151	298.91	86.63	358.17	0.55	6.97	2168	1276256153	PIN13905.1	1394	3.6e-151	Alanine-glyoxylate aminotransferase AGT1 [Handroanthus impetiginosus]	XM_011091863.2	XM_011091863	579	0	PREDICTED: Sesamum indicum serine--glyoxylate aminotransferase (LOC105170923), mRNA	K00830	AGXT	alanine-glyoxylate transaminase / serine-glyoxylate transaminase / serine-pyruvate transaminase [EC:2.6.1.44 2.6.1.45 2.6.1.51]	http://www.genome.jp/dbget-bin/www_bget?ko:K00830	Q56YA5	1294	5.4e-141	Serine--glyoxylate aminotransferase OS=Arabidopsis thaliana OX=3702 GN=AGT1 PE=1 SV=2	PF01276	Orn/Lys/Arg decarboxylase, major domain	--	--	GO:0003824	catalytic activity	--	--	KOG2862	Alanine-glyoxylate aminotransferase AGT1	UP	7.49388	3.4e-36	DOWN	-4.05381	7.52e-13	UP	3.32886	4.18e-12	UP	9.75301	1.95e-52	UP	5.64967	4.92e-27
Cluster-11149.44640	0.12	3.29	0.93	1.14	0.12	623	--	--	--	--	--	--	--	--	--	--	--	--	--	--	--	--	--	--	PF06423//PF04277//PF06305//PF12822	GWT1//Oxaloacetate decarboxylase, gamma chain//Lipopolysaccharide assembly protein A domain//ECF transporter, substrate-specific component	GO:0006560//GO:0036376//GO:0006525//GO:0006506//GO:0006090//GO:0006814	proline metabolic process//sodium ion export across plasma membrane//arginine metabolic process//GPI anchor biosynthetic process//pyruvate metabolic process//sodium ion transport	GO:0022857//GO:0016746//GO:0015081//GO:0008948	transmembrane transporter activity//transferase activity, transferring acyl groups//sodium ion transmembrane transporter activity//oxaloacetate decarboxylase activity	GO:0005887//GO:0016020//GO:0016021	integral component of plasma membrane//membrane//integral component of membrane	--	--	FALSE	1.73563	0.0683422	FALSE	2.77149	0.13038	UP	4.38805	0.000143347	FALSE	-2.53229	0.369361	FALSE	0.181929	1
Cluster-11149.17070	9.05	6.67	8.27	0.35	1.13	2040	747063030	XP_011078049.1	2105	1.2e-233	threonine synthase 1, chloroplastic [Sesamum indicum]	XM_012992749.1	XM_012992749	726	0	PREDICTED: Erythranthe guttatus threonine synthase 1, chloroplastic (LOC105968130), mRNA	K01733	thrC	threonine synthase	http://www.genome.jp/dbget-bin/www_bget?ko:K01733	Q9MT28	1949	5.6e-217	Threonine synthase, chloroplastic OS=Solanum tuberosum OX=4113 PE=2 SV=1	PF03709	Orn/Lys/Arg decarboxylase, N-terminal domain	--	--	GO:0016831	carboxy-lyase activity	--	--	--	--	UP	4.42671	7.1e-14	DOWN	-2.06191	0.0033178	UP	2.25329	1.78e-05	UP	5.33923	1.91e-19	UP	3.22757	4.93e-10
Cluster-17176.0	0.34	1.87	0.71	1.59	0.14	1498	1276271337	PIN26748.1	1143	3.1e-122	hypothetical protein CDL12_00467 [Handroanthus impetiginosus]	XM_011092208.2	XM_011092208	328	8.06e-169	PREDICTED: Sesamum indicum protein UPSTREAM OF FLC (LOC105171180), mRNA	-	-	-	http://www.genome.jp/dbget-bin/www_bget?ko:-	Q9LX14	627	8.1e-64	Protein UPSTREAM OF FLC OS=Arabidopsis thaliana OX=3702 GN=UFC PE=2 SV=1	PF04277	Oxaloacetate decarboxylase, gamma chain	GO:0036376//GO:0006560//GO:0006525//GO:0006090//GO:0006814	sodium ion export across plasma membrane//proline metabolic process//arginine metabolic process//pyruvate metabolic process//sodium ion transport	GO:0015081//GO:0008948	sodium ion transmembrane transporter activity//oxaloacetate decarboxylase activity	GO:0016020	membrane	--	--	FALSE	0.43615	0.780288	UP	3.09634	0.000440598	UP	3.41983	3.67e-05	FALSE	-1.54429	0.0697638	FALSE	1.49573	0.327648
Cluster-18266.0	0.23	1.04	1.81	0.35	0.43	1564	747050894	XP_011071531.1	1493	8.5e-163	S-adenosylmethionine decarboxylase proenzyme 4-like [Sesamum indicum]	XM_011073229.2	XM_011073229	528	0	PREDICTED: Sesamum indicum S-adenosylmethionine decarboxylase proenzyme 4-like (LOC105156957), mRNA	K01611	speD, AMD1	S-adenosylmethionine decarboxylase	http://www.genome.jp/dbget-bin/www_bget?ko:K01611	Q3E9D5	921	6.9e-98	S-adenosylmethionine decarboxylase proenzyme 4 OS=Arabidopsis thaliana OX=3702 GN=SAMDC4 PE=1 SV=1	PF01536	Adenosylmethionine decarboxylase	GO:0006560//GO:0006525//GO:0006597//GO:0008295	proline metabolic process//arginine metabolic process//spermine biosynthetic process//spermidine biosynthetic process	GO:0004014	adenosylmethionine decarboxylase activity	--	--	KOG0788	S-adenosylmethionine decarboxylase	FALSE	1.74617	0.0489556	FALSE	-0.658785	0.707818	FALSE	0.976067	0.273386	FALSE	0.0268364	1	FALSE	-0.679493	0.786096
Cluster-11149.18767	1.49	2.27	3.14	5.75	1.29	2288	747088978	XP_011092106.1	825	3.6e-85	probable protein phosphatase 2C 34 [Sesamum indicum]	XM_023014906.1	XM_023014906	270	2.17e-136	PREDICTED: Olea europaea var. sylvestris probable protein phosphatase 2C 34 (LOC111389917), mRNA	-	-	-	http://www.genome.jp/dbget-bin/www_bget?ko:-	Q0WRB2	707	6.6e-73	Probable protein phosphatase 2C 73 OS=Arabidopsis thaliana OX=3702 GN=PPC6-7 PE=2 SV=1	PF00481//PF04277//PF07228	Protein phosphatase 2C//Oxaloacetate decarboxylase, gamma chain//Stage II sporulation protein E (SpoIIE)	GO:0006560//GO:0036376//GO:0006525//GO:0006814//GO:0006090	proline metabolic process//sodium ion export across plasma membrane//arginine metabolic process//sodium ion transport//pyruvate metabolic process	GO:0003824//GO:0008948//GO:0015081	catalytic activity//oxaloacetate decarboxylase activity//sodium ion transmembrane transporter activity	GO:0016020	membrane	--	--	FALSE	-1.13993	0.0582901	UP	1.76178	0.00133359	FALSE	0.511187	0.471714	FALSE	-1.26861	0.0306598	FALSE	0.442979	0.618116
Cluster-11149.18811	3.58	7.38	4.45	4.72	1.94	1270	1024029627	KZV41039.1	396	1.1e-35	ADP-ribosylation factor-related protein 1-like [Dorcoceras hygrometricum]	XM_011077894.2	XM_011077894	202	7.51e-99	PREDICTED: Sesamum indicum ADP-ribosylation factor-related protein 1 (LOC105160497), mRNA	K07952	ARFRP1	ADP-ribosylation factor related protein 1	http://www.genome.jp/dbget-bin/www_bget?ko:K07952	Q32LJ2	221	8.3e-17	ADP-ribosylation factor-related protein 1 OS=Bos taurus OX=9913 GN=ARFRP1 PE=2 SV=1	PF03205//PF16957//PF01580//PF00071//PF04670//PF01926//PF00503//PF00025	Molybdopterin guanine dinucleotide synthesis protein B//Malonate decarboxylase, alpha subunit, transporter//FtsK/SpoIIIE family//Ras family//Gtr1/RagA G protein conserved region//50S ribosome-binding GTPase//G-protein alpha subunit//ADP-ribosylation factor family	GO:0007186//GO:0006777	G protein-coupled receptor signaling pathway//Mo-molybdopterin cofactor biosynthetic process	GO:0005524//GO:0031683//GO:0019001//GO:0016740//GO:0005525//GO:0000166//GO:0003677//GO:0003924	ATP binding//G-protein beta/gamma-subunit complex binding//guanyl nucleotide binding//transferase activity//GTP binding//nucleotide binding//DNA binding//GTPase activity	--	--	KOG0070	GTP-binding ADP-ribosylation factor Arf1	FALSE	0.848105	0.221535	FALSE	0.883148	0.233202	UP	1.62037	0.00352918	FALSE	0.272325	0.872129	FALSE	1.10509	0.0781881
Cluster-11149.12265	3.96	2.82	8.45	2.52	3.72	1141	1279003604	XP_022862167.1	1527	7.1e-167	serine carboxypeptidase-like [Olea europaea var. sylvestris]	XM_011091650.2	XM_011091650	685	0	PREDICTED: Sesamum indicum serine carboxypeptidase-like (LOC105170748), mRNA	-	-	-	http://www.genome.jp/dbget-bin/www_bget?ko:-	Q56WF8	1219	1.4e-132	Serine carboxypeptidase-like 48 OS=Arabidopsis thaliana OX=3702 GN=SCPL48 PE=2 SV=2	PF01208//PF00450	Uroporphyrinogen decarboxylase (URO-D)//Serine carboxypeptidase	GO:0006779//GO:0015994//GO:0006508	porphyrin-containing compound biosynthetic process//chlorophyll metabolic process//proteolysis	GO:0004853//GO:0004185	uroporphyrinogen decarboxylase activity//serine-type carboxypeptidase activity	--	--	KOG1282	Serine carboxypeptidases (lysosomal cathepsin A)	FALSE	0.368044	0.835728	FALSE	-0.961618	0.16885	FALSE	-0.704083	0.312845	FALSE	1.32389	0.0382676	FALSE	0.312393	0.752675
Cluster-11149.6558	4.38	6.88	3.16	7.22	1.4	1479	747076512	XP_011085332.1	382	5.4e-34	uncharacterized protein LOC105167350 isoform X2 [Sesamum indicum]	XM_011087032.2	XM_011087032	196	1.9e-95	PREDICTED: Sesamum indicum uncharacterized LOC105167351 (LOC105167351), transcript variant X1, mRNA	-	-	-	http://www.genome.jp/dbget-bin/www_bget?ko:-	--	--	--	--	PF03711//PF06756	Orn/Lys/Arg decarboxylase, C-terminal domain//Chorion protein S19 C-terminal	GO:0007275	multicellular organism development	GO:0003824	catalytic activity	GO:0042600	egg chorion	--	--	FALSE	0.134544	1	UP	1.96481	0.000534718	UP	1.98846	0.000247963	FALSE	-0.0462414	1	UP	1.86788	0.000920544
Cluster-11149.32166	5.38	5.62	5.41	5.81	2.43	2317	1276262687	PIN19339.1	1324	5e-143	Phosphatidylserine decarboxylase [Handroanthus impetiginosus]	XM_011083016.2	XM_011083016	624	0	PREDICTED: Sesamum indicum phosphatidylserine decarboxylase proenzyme 1, mitochondrial (LOC105164376), mRNA	K01613	psd, PISD	phosphatidylserine decarboxylase	http://www.genome.jp/dbget-bin/www_bget?ko:K01613	Q84V22	930	9.2e-99	Phosphatidylserine decarboxylase proenzyme 1, mitochondrial OS=Arabidopsis thaliana OX=3702 GN=PSD1 PE=2 SV=1	PF02666	Phosphatidylserine decarboxylase	GO:0046486//GO:0006563//GO:0006566//GO:0008654//GO:0006544	glycerolipid metabolic process//L-serine metabolic process//threonine metabolic process//phospholipid biosynthetic process//glycine metabolic process	GO:0004609	phosphatidylserine decarboxylase activity	--	--	KOG2420	Phosphatidylserine decarboxylase	FALSE	0.153416	1	FALSE	0.859215	0.183693	FALSE	0.901858	0.106163	FALSE	0.563134	0.466901	FALSE	1.37217	0.00951179
Cluster-11149.42624	1.33	0.17	0.99	0.16	0.5	510	1276250709	PIN09573.1	181	3.8e-11	Phosphatidylserine decarboxylase [Handroanthus impetiginosus]	XM_020695940.1	XM_020695940	88	6.81e-36	PREDICTED: Sesamum indicum phosphatidylserine decarboxylase proenzyme 2-like (LOC105169187), transcript variant X2, mRNA	K01613	psd, PISD	phosphatidylserine decarboxylase	http://www.genome.jp/dbget-bin/www_bget?ko:K01613	Q5JN42	173	1.2e-11	Phosphatidylserine decarboxylase proenzyme 2 OS=Oryza sativa subsp. japonica OX=39947 GN=PSD2 PE=3 SV=3	--	--	--	--	--	--	--	--	--	--	FALSE	0.234667	1	FALSE	-1.86689	0.909352	FALSE	-1.72507	0.830691	FALSE	3.49	0.093697	FALSE	1.57749	0.36165
Cluster-11357.0	0.07	0.98	1.2	1.79	0.62	1502	527184927	EPS58588.1	210	4.9e-14	hypothetical protein M569_16225, partial [Genlisea aurea]	--	--	--	--	--	-	-	-	http://www.genome.jp/dbget-bin/www_bget?ko:-	--	--	--	--	PF04277	Oxaloacetate decarboxylase, gamma chain	GO:0006090//GO:0006814//GO:0036376//GO:0006560//GO:0006525	pyruvate metabolic process//sodium ion transport//sodium ion export across plasma membrane//proline metabolic process//arginine metabolic process	GO:0015081//GO:0008948	sodium ion transmembrane transporter activity//oxaloacetate decarboxylase activity	GO:0016020	membrane	--	--	FALSE	-0.654522	0.558948	FALSE	1.12871	0.175331	FALSE	0.363885	0.796015	DOWN	-3.98511	3.1e-05	FALSE	-2.89454	0.0138163
Cluster-11149.28927	54.56	68.35	64.07	64.57	33.67	1715	45935133	AAS79591.1	1596	1.1e-174	putative dihydroflavonol reductase [Ipomoea trifida]	XM_012983118.1	XM_012983118	693	0	PREDICTED: Erythranthe guttatus UDP-D-apiose/UDP-D-xylose synthase 2 (LOC105959089), mRNA	-	-	-	http://www.genome.jp/dbget-bin/www_bget?ko:-	Q9SGE0	1495	2.1e-164	UDP-D-apiose/UDP-D-xylose synthase 2 OS=Arabidopsis thaliana OX=3702 GN=AXS2 PE=2 SV=1	PF03721//PF01370//PF01073//PF03435	UDP-glucose/GDP-mannose dehydrogenase family, NAD binding domain//NAD dependent epimerase/dehydratase family//3-beta hydroxysteroid dehydrogenase/isomerase family//Saccharopine dehydrogenase NADP binding domain	GO:0008207//GO:0055114//GO:0008210//GO:0006694//GO:0008209	C21-steroid hormone metabolic process//oxidation-reduction process//estrogen metabolic process//steroid biosynthetic process//androgen metabolic process	GO:0051287//GO:0003854//GO:0016491//GO:0003824//GO:0016616//GO:0050662	NAD binding//3-beta-hydroxy-delta5-steroid dehydrogenase activity//oxidoreductase activity//catalytic activity//oxidoreductase activity, acting on the CH-OH group of donors, NAD or NADP as acceptor//obsolete coenzyme binding	--	--	KOG1429	dTDP-glucose 4-6-dehydratase/UDP-glucuronic acid decarboxylase	FALSE	0.28498	0.835728	FALSE	0.54282	0.446034	FALSE	0.717018	0.184306	FALSE	0.430896	0.612487	FALSE	0.923695	0.0741242
Cluster-11149.41946	10.38	28.08	14.58	9.48	7.71	916	747043091	XP_011082021.1	149	3.5e-07	phosphopantothenoylcysteine decarboxylase subunit VHS3-like isoform X2 [Sesamum indicum]	GU011751.1	GU011751	106	1.25e-45	Tabebuia rosea microsatellite D8_seg64 sequence	--	--	--	--	--	--	--	--	PF04499	SIT4 phosphatase-associated protein	GO:0043666	regulation of phosphoprotein phosphatase activity	GO:0019903	protein phosphatase binding	--	--	--	--	UP	1.77513	0.000662587	FALSE	-0.100083	1	UP	1.56419	0.00207589	FALSE	0.799333	0.233253	FALSE	0.649193	0.29889
Cluster-11149.16720	29.04	34.81	32.12	24.8	17.17	2332	1276261436	PIN18277.1	853	2.1e-88	Oxaloacetate decarboxylase [Handroanthus impetiginosus]	XM_011077869.2	XM_011077869	414	0	PREDICTED: Sesamum indicum putative 4-hydroxy-4-methyl-2-oxoglutarate aldolase 2 (LOC105160481), mRNA	-	-	-	http://www.genome.jp/dbget-bin/www_bget?ko:-	Q9FFE0	772	1.9e-80	Putative 4-hydroxy-4-methyl-2-oxoglutarate aldolase 2 OS=Arabidopsis thaliana OX=3702 GN=At5g16450 PE=1 SV=1	--	--	--	--	--	--	--	--	--	--	FALSE	0.690185	0.299129	FALSE	0.134783	0.999649	FALSE	0.714184	0.18884	FALSE	0.902587	0.121172	FALSE	0.987347	0.0553034
Cluster-11149.5869	0	0.24	2.99	0	1.65	432	--	--	--	--	--	--	--	--	--	--	--	--	--	--	--	--	--	--	PF08496//PF04277	Peptidase family S49 N-terminal//Oxaloacetate decarboxylase, gamma chain	GO:0006090//GO:0006814//GO:0036376//GO:0006560//GO:0006525	pyruvate metabolic process//sodium ion transport//sodium ion export across plasma membrane//proline metabolic process//arginine metabolic process	GO:0015081//GO:0008948//GO:0004252	sodium ion transmembrane transporter activity//oxaloacetate decarboxylase activity//serine-type endopeptidase activity	GO:0005886//GO:0016020	plasma membrane//membrane	--	--	FALSE	3.29321	1	FALSE	-6.05708	0.0575446	FALSE	-2.91715	0.134513	FALSE	0	1	FALSE	-5.73599	0.0636174
Cluster-11149.4171	1.91	5.6	3.53	4.08	1.97	363	848875436	XP_012838184.1	466	2.4e-44	PREDICTED: E3 SUMO-protein ligase SIZ1-like [Erythranthe guttata]	--	--	--	--	--	-	-	-	http://www.genome.jp/dbget-bin/www_bget?ko:-	Q680Q4	292	1.4e-25	E3 SUMO-protein ligase SIZ1 OS=Arabidopsis thaliana OX=3702 GN=SIZ1 PE=1 SV=2	PF02627	Carboxymuconolactone decarboxylase family	GO:0055114	oxidation-reduction process	GO:0051920	peroxiredoxin activity	--	--	--	--	FALSE	0.718372	0.691943	FALSE	0.633392	0.801302	FALSE	1.24052	0.340481	FALSE	-0.452089	0.95664	FALSE	0.131048	1
Cluster-11149.16369	14.63	12.62	12.16	13.23	6.83	4799	1276246743	PIN06504.1	1277	2.9e-137	hypothetical protein CDL12_20937 [Handroanthus impetiginosus]	XM_011082109.2	XM_011082109	712	0	PREDICTED: Sesamum indicum rho GTPase-activating protein 7 (LOC105163670), transcript variant X2, mRNA	-	-	-	http://www.genome.jp/dbget-bin/www_bget?ko:-	Q8RWQ4	781	3.6e-81	Rho GTPase-activating protein 7 OS=Arabidopsis thaliana OX=3702 GN=ROPGAP7 PE=2 SV=1	PF15854//PF11807//PF03741//PF14171//PF04277//PF00620//PF04647	G-protein coupled receptor ligand 15//Mycotoxin biosynthesis protein UstYa//Integral membrane protein TerC family//Toxin SpoIISA, type II toxin-antitoxin system//Oxaloacetate decarboxylase, gamma chain//RhoGAP domain//Accessory gene regulator B	GO:0007165//GO:0043386//GO:0036376//GO:0006560//GO:0006525//GO:0006814//GO:0009405//GO:0009372//GO:0006090	signal transduction//mycotoxin biosynthetic process//sodium ion export across plasma membrane//proline metabolic process//arginine metabolic process//sodium ion transport//pathogenesis//quorum sensing//pyruvate metabolic process	GO:0008233//GO:0001664//GO:0008948//GO:0015081	peptidase activity//G protein-coupled receptor binding//oxaloacetate decarboxylase activity//sodium ion transmembrane transporter activity	GO:0016020//GO:0016021	membrane//integral component of membrane	--	--	FALSE	0.131866	1	FALSE	0.558251	0.428785	FALSE	0.579339	0.313229	FALSE	0.822019	0.170096	FALSE	1.33024	0.00702387
Cluster-11149.16620	9.1	8.8	14.38	9.56	8.58	364	--	--	--	--	--	--	--	--	--	--	--	--	--	--	--	--	--	--	PF02064//PF04408//PF04557//PF03839//PF05104//PF04277//PF06530	MAS20 protein import receptor//Helicase associated domain (HA2)//Glutaminyl-tRNA synthetase, non-specific RNA binding region part 2//Translocation protein Sec62//Ribosome receptor lysine/proline rich region//Oxaloacetate decarboxylase, gamma chain//Phage antitermination protein Q	GO:0006814//GO:0006425//GO:0006560//GO:0006886//GO:0006090//GO:0060567//GO:0006605//GO:0036376//GO:0006525//GO:0015031	sodium ion transport//glutaminyl-tRNA aminoacylation//proline metabolic process//intracellular protein transport//pyruvate metabolic process//negative regulation of DNA-templated transcription, termination//protein targeting//sodium ion export across plasma membrane//arginine metabolic process//protein transport	GO:0004386//GO:0000166//GO:0005524//GO:0015081//GO:0004819//GO:0008948//GO:0003677	helicase activity//nucleotide binding//ATP binding//sodium ion transmembrane transporter activity//glutamine-tRNA ligase activity//oxaloacetate decarboxylase activity//DNA binding	GO:0030176//GO:0016020//GO:0005742//GO:0005737	integral component of endoplasmic reticulum membrane//membrane//mitochondrial outer membrane translocase complex//cytoplasm	--	--	FALSE	0.147696	1	FALSE	-0.246522	0.953515	FALSE	-0.209014	1	FALSE	0.561059	0.719792	FALSE	0.264622	0.882294
Cluster-11149.14095	1.84	2.72	1.97	3.43	1.24	3373	848916543	XP_012855829.1	417	1.1e-37	PREDICTED: 3beta-hydroxysteroid-dehydrogenase/decarboxylase isoform 2 [Erythranthe guttata]	XM_013000376.1	XM_013000376	229	1.99e-113	PREDICTED: Erythranthe guttatus 3beta-hydroxysteroid-dehydrogenase/decarboxylase isoform 2 (LOC105975202), transcript variant X2, mRNA	K07748	E1.1.1.170, NSDHL, ERG26	sterol-4alpha-carboxylate 3-dehydrogenase (decarboxylating)	http://www.genome.jp/dbget-bin/www_bget?ko:K07748	Q67ZE1	322	4.3e-28	3beta-hydroxysteroid-dehydrogenase/decarboxylase isoform 2 OS=Arabidopsis thaliana OX=3702 GN=3BETAHSD/D2 PE=2 SV=2	PF06624	Ribosome associated membrane protein RAMP4	--	--	--	--	GO:0005783	endoplasmic reticulum	--	--	FALSE	-0.134956	1	FALSE	1.0697	0.0779971	FALSE	0.823987	0.159581	FALSE	-0.221962	0.927968	FALSE	0.797566	0.191814
Cluster-9926.0	1.17	2.03	2.15	2.2	1.37	944	--	--	--	--	--	--	--	--	--	--	--	--	--	--	--	--	--	--	PF04277	Oxaloacetate decarboxylase, gamma chain	GO:0006090//GO:0006814//GO:0006560//GO:0036376//GO:0006525	pyruvate metabolic process//sodium ion transport//proline metabolic process//sodium ion export across plasma membrane//arginine metabolic process	GO:0015081//GO:0008948	sodium ion transmembrane transporter activity//oxaloacetate decarboxylase activity	GO:0016020	membrane	--	--	FALSE	0.0936415	1	FALSE	0.284593	0.978961	FALSE	0.267788	0.889652	FALSE	-0.241588	1	FALSE	-0.00683456	1
Cluster-11149.25971	48.13	75.54	51.55	64.49	33.15	2012	747052859	XP_011072561.1	2493	1.2e-278	threonine synthase, chloroplastic [Sesamum indicum]	XM_011074259.2	XM_011074259	1051	0	PREDICTED: Sesamum indicum threonine synthase, chloroplastic (LOC105157786), mRNA	K01733	thrC	threonine synthase	http://www.genome.jp/dbget-bin/www_bget?ko:K01733	Q9MT28	2323	2.4e-260	Threonine synthase, chloroplastic OS=Solanum tuberosum OX=4113 PE=2 SV=1	PF03709	Orn/Lys/Arg decarboxylase, N-terminal domain	--	--	GO:0016831	carboxy-lyase activity	--	--	--	--	FALSE	0.430149	0.618123	FALSE	0.563555	0.415417	FALSE	0.88292	0.0902501	FALSE	0.252431	0.841577	FALSE	0.765968	0.156701
Cluster-11149.34510	9.12	16.49	15.39	25.08	9.97	1131	848870739	XP_012835958.1	511	4.6e-49	PREDICTED: UDP-glucuronic acid decarboxylase 1-like [Erythranthe guttata]	XM_011096493.2	XM_011096493	238	6.48e-119	PREDICTED: Sesamum indicum UDP-glucuronic acid decarboxylase 1 (LOC105174398), mRNA	K08678	UXS1, uxs	UDP-glucuronate decarboxylase	http://www.genome.jp/dbget-bin/www_bget?ko:K08678	Q8VZC0	483	3.1e-47	UDP-glucuronic acid decarboxylase 1 OS=Arabidopsis thaliana OX=3702 GN=UXS1 PE=1 SV=1	--	--	--	--	--	--	--	--	KOG1429	dTDP-glucose 4-6-dehydratase/UDP-glucuronic acid decarboxylase	FALSE	-0.39896	0.690007	FALSE	0.933076	0.120524	FALSE	0.423367	0.52821	FALSE	-0.78764	0.2289	FALSE	0.0954177	1
Cluster-11149.33496	1.06	4.67	3.54	13.48	2.32	2770	1276263288	PIN19859.1	2828	0	Thiamine pyrophosphate-requiring enzyme [Handroanthus impetiginosus]	XM_011096740.2	XM_011096740	1182	0	PREDICTED: Sesamum indicum pyruvate decarboxylase 1 (LOC105174592), mRNA	K01568	PDC, pdc	pyruvate decarboxylase	http://www.genome.jp/dbget-bin/www_bget?ko:K01568	O82647	2523	2.1e-283	Pyruvate decarboxylase 1 OS=Arabidopsis thaliana OX=3702 GN=PDC1 PE=2 SV=1	PF00205//PF02776//PF00569//PF02775	Thiamine pyrophosphate enzyme, central domain//Thiamine pyrophosphate enzyme, N-terminal TPP binding domain//Zinc finger, ZZ type//Thiamine pyrophosphate enzyme, C-terminal TPP binding domain	--	--	GO:0030976//GO:0000287//GO:0008270//GO:0003824	thiamine pyrophosphate binding//magnesium ion binding//zinc ion binding//catalytic activity	--	--	KOG1184	Thiamine pyrophosphate-requiring enzyme	FALSE	-1.32966	0.0142705	UP	2.14165	2.28e-05	FALSE	0.701248	0.242465	DOWN	-2.99615	5.76e-09	FALSE	-0.904317	0.139613
Cluster-11149.28012	0.97	1.28	0.85	0.67	0.56	2080	604335621	EYU39509.1	1591	4.9e-174	hypothetical protein MIMGU_mgv1a026458mg [Erythranthe guttata]	XM_012979018.1	XM_012979018	407	0	PREDICTED: Erythranthe guttatus serine/threonine-protein kinase At3g07070-like (LOC105955300), mRNA	-	-	-	http://www.genome.jp/dbget-bin/www_bget?ko:-	Q9M8S2	1124	2.7e-121	Receptor-like kinase LIP2 OS=Arabidopsis thaliana OX=3702 GN=LIP2 PE=1 SV=1	PF00069//PF02784//PF07714	Protein kinase domain//Pyridoxal-dependent decarboxylase, pyridoxal binding domain//Protein tyrosine and serine/threonine kinase	GO:0006468	protein phosphorylation	GO:0003824//GO:0005524//GO:0004672	catalytic activity//ATP binding//protein kinase activity	--	--	--	--	FALSE	1.13017	0.146223	FALSE	-0.150922	1	FALSE	0.86836	0.27638	FALSE	1.20928	0.115082	FALSE	1.00794	0.170428
Cluster-11149.23014	12.22	27.67	21.21	24.98	14.14	2947	1276237721	PIN00189.1	1214	3.6e-130	Uridine 5'- monophosphate synthase/orotate phosphoribosyltransferase [Handroanthus impetiginosus]	XM_011090223.2	XM_011090223	551	0	PREDICTED: Sesamum indicum uridine 5'-monophosphate synthase (LOC105169715), transcript variant X4, mRNA	K13421	UMPS	uridine monophosphate synthetase [EC:2.4.2.10 4.1.1.23]	http://www.genome.jp/dbget-bin/www_bget?ko:K13421	Q42942	1072	4e-115	Uridine 5'-monophosphate synthase (Fragment) OS=Nicotiana tabacum OX=4097 GN=PYR5-6 PE=2 SV=1	PF00356//PF00215//PF02431//PF00156	Bacterial regulatory proteins, lacI family//Orotidine 5'-phosphate decarboxylase / HUMPS family//Chalcone-flavanone isomerase//Phosphoribosyl transferase domain	GO:0006206//GO:0006207//GO:0009116//GO:0006355	pyrimidine nucleobase metabolic process//'de novo' pyrimidine nucleobase biosynthetic process//nucleoside metabolic process//regulation of transcription, DNA-templated	GO:0003677//GO:0016872//GO:0004590	DNA binding//intramolecular lyase activity//orotidine-5'-phosphate decarboxylase activity	--	--	KOG1377	Uridine 5'- monophosphate synthase/orotate phosphoribosyltransferase	FALSE	0.347923	0.749187	FALSE	0.425518	0.604528	FALSE	0.66266	0.234501	FALSE	-0.356393	0.745764	FALSE	0.0191191	1
Cluster-11149.24551	13.49	20.78	18.96	20.89	12.66	1233	747089028	XP_011092135.1	805	4e-83	zinc finger matrin-type protein 2 [Sesamum indicum]	XM_011093833.2	XM_011093833	408	0	PREDICTED: Sesamum indicum zinc finger matrin-type protein 2 (LOC105172420), mRNA	K12848	SNU23	U4/U6.U5 tri-snRNP component SNU23	http://www.genome.jp/dbget-bin/www_bget?ko:K12848	Q96NC0	422	4e-40	Zinc finger matrin-type protein 2 OS=Homo sapiens OX=9606 GN=ZMAT2 PE=1 SV=1	PF01080//PF10278//PF08648//PF04277//PF02919	Presenilin//Mediator of RNA pol II transcription subunit 19//U4/U6.U5 small nuclear ribonucleoproteins//Oxaloacetate decarboxylase, gamma chain//Eukaryotic DNA topoisomerase I, DNA binding fragment	GO:0006265//GO:0006357//GO:0006560//GO:0006814//GO:0016485//GO:0006525//GO:0036376//GO:0006090//GO:0008380	DNA topological change//regulation of transcription by RNA polymerase II//proline metabolic process//sodium ion transport//protein processing//arginine metabolic process//sodium ion export across plasma membrane//pyruvate metabolic process//RNA splicing	GO:0003917//GO:0004190//GO:0003712//GO:0003677//GO:0008948//GO:0015081	DNA topoisomerase type I (single strand cut, ATP-independent) activity//aspartic-type endopeptidase activity//transcription coregulator activity//DNA binding//oxaloacetate decarboxylase activity//sodium ion transmembrane transporter activity	GO:0016021//GO:0016020//GO:0016592//GO:0005667	integral component of membrane//membrane//mediator complex//transcription regulator complex	KOG4727	U1-like Zn-finger protein	FALSE	0.19711	0.965661	FALSE	0.324923	0.761518	FALSE	0.411268	0.537976	FALSE	0.04007	1	FALSE	0.314973	0.701706
Cluster-11149.13351	5.22	8.16	7.5	4.13	5.02	620	747052766	XP_011072511.1	586	5e-58	uncharacterized protein LOC105157747 [Sesamum indicum]	XM_011074209.2	XM_011074209	341	1.91e-176	PREDICTED: Sesamum indicum uncharacterized LOC105157747 (LOC105157747), mRNA	-	-	-	http://www.genome.jp/dbget-bin/www_bget?ko:-	--	--	--	--	PF01529//PF02687//PF04277//PF00424	DHHC palmitoyltransferase//FtsX-like permease family//Oxaloacetate decarboxylase, gamma chain//REV protein (anti-repression trans-activator protein)	GO:0006814//GO:0006355//GO:0006090//GO:0042967//GO:0006525//GO:0036376//GO:0006560	sodium ion transport//regulation of transcription, DNA-templated//pyruvate metabolic process//obsolete acyl-carrier-protein biosynthetic process//arginine metabolic process//sodium ion export across plasma membrane//proline metabolic process	GO:0008948//GO:0016409//GO:0015081//GO:0003700	oxaloacetate decarboxylase activity//palmitoyltransferase activity//sodium ion transmembrane transporter activity//DNA-binding transcription factor activity	GO:0016020//GO:0005667//GO:0042025	membrane//transcription regulator complex//host cell nucleus	--	--	FALSE	1.19943	0.103802	FALSE	-0.678835	0.485866	FALSE	0.409798	0.636128	FALSE	0.998137	0.226082	FALSE	0.269451	0.858656
Cluster-11149.14096	8.82	13.17	12.85	18.03	8.65	1300	848916543	XP_012855829.1	1522	3.1e-166	PREDICTED: 3beta-hydroxysteroid-dehydrogenase/decarboxylase isoform 2 [Erythranthe guttata]	XR_002287329.1	XR_002287329	688	0	PREDICTED: Sesamum indicum 3beta-hydroxysteroid-dehydrogenase/decarboxylase (LOC105164848), transcript variant X3, misc_RNA	K07748	E1.1.1.170, NSDHL, ERG26	sterol-4alpha-carboxylate 3-dehydrogenase (decarboxylating)	http://www.genome.jp/dbget-bin/www_bget?ko:K07748	Q67ZE1	1366	1.4e-149	3beta-hydroxysteroid-dehydrogenase/decarboxylase isoform 2 OS=Arabidopsis thaliana OX=3702 GN=3BETAHSD/D2 PE=2 SV=2	PF01370//PF01073	NAD dependent epimerase/dehydratase family//3-beta hydroxysteroid dehydrogenase/isomerase family	GO:0055114//GO:0008207//GO:0008210//GO:0006694//GO:0008209	oxidation-reduction process//C21-steroid hormone metabolic process//estrogen metabolic process//steroid biosynthetic process//androgen metabolic process	GO:0003854//GO:0016616//GO:0003824//GO:0050662	3-beta-hydroxy-delta5-steroid dehydrogenase activity//oxidoreductase activity, acting on the CH-OH group of donors, NAD or NADP as acceptor//catalytic activity//obsolete coenzyme binding	--	--	KOG1430	C-3 sterol dehydrogenase/3-beta-hydroxysteroid dehydrogenase and related dehydrogenases	FALSE	-0.248742	0.891373	FALSE	0.661339	0.350008	FALSE	0.301853	0.705108	FALSE	-0.359745	0.755796	FALSE	0.251567	0.77851
Cluster-11149.30978	8.74	17.63	12.14	22.09	8.22	3143	1276258889	PIN16182.1	1742	2.3e-191	Serine/threonine protein kinase [Handroanthus impetiginosus]	XM_011093144.2	XM_011093144	820	0	PREDICTED: Sesamum indicum proline-rich receptor-like protein kinase PERK3 (LOC105171888), transcript variant X2, mRNA	-	-	-	http://www.genome.jp/dbget-bin/www_bget?ko:-	Q8RWW0	541	1.6e-53	Receptor-like serine/threonine-protein kinase ALE2 OS=Arabidopsis thaliana OX=3702 GN=ALE2 PE=1 SV=1	PF04277//PF00069//PF01022//PF07714	Oxaloacetate decarboxylase, gamma chain//Protein kinase domain//Bacterial regulatory protein, arsR family//Protein tyrosine and serine/threonine kinase	GO:0006814//GO:0006355//GO:0006090//GO:0006468//GO:0036376//GO:0006560//GO:0006525	sodium ion transport//regulation of transcription, DNA-templated//pyruvate metabolic process//protein phosphorylation//sodium ion export across plasma membrane//proline metabolic process//arginine metabolic process	GO:0008948//GO:0015081//GO:0005524//GO:0003700//GO:0004672	oxaloacetate decarboxylase activity//sodium ion transmembrane transporter activity//ATP binding//DNA-binding transcription factor activity//protein kinase activity	GO:0016020//GO:0005667	membrane//transcription regulator complex	--	--	FALSE	-0.125655	1	FALSE	1.03107	0.0631054	FALSE	0.794636	0.139169	FALSE	-0.661214	0.327135	FALSE	0.319835	0.680477
Cluster-11149.35517	2.78	8.7	2.87	6.83	1.96	1897	747095519	XP_011095638.1	498	2.5e-47	phosphatidylinositol/phosphatidylcholine transfer protein SFH13 isoform X1 [Sesamum indicum]	XM_011097337.2	XM_011097337	208	5.23e-102	PREDICTED: Sesamum indicum phosphatidylinositol/phosphatidylcholine transfer protein SFH13 (LOC105175029), transcript variant X2, mRNA	-	-	-	http://www.genome.jp/dbget-bin/www_bget?ko:-	Q501H5	368	1.1e-33	Phosphatidylinositol/phosphatidylcholine transfer protein SFH13 OS=Arabidopsis thaliana OX=3702 GN=SFH13 PE=2 SV=1	PF04277	Oxaloacetate decarboxylase, gamma chain	GO:0006814//GO:0006090//GO:0006525//GO:0006560//GO:0036376	sodium ion transport//pyruvate metabolic process//arginine metabolic process//proline metabolic process//sodium ion export across plasma membrane	GO:0008948//GO:0015081	oxaloacetate decarboxylase activity//sodium ion transmembrane transporter activity	GO:0016020	membrane	--	--	FALSE	0.550835	0.497771	FALSE	1.4011	0.0146364	UP	1.84109	0.000340762	FALSE	-0.624422	0.405055	FALSE	0.726473	0.266049
Cluster-11149.29526	2.39	4.4	4.96	7.61	3.4	770	604342643	EYU41667.1	411	1.2e-37	hypothetical protein MIMGU_mgv1a006632mg [Erythranthe guttata]	XM_011079117.2	XM_011079117	181	2.11e-87	PREDICTED: Sesamum indicum UDP-glucuronic acid decarboxylase 1 (LOC105161434), transcript variant X2, mRNA	K08678	UXS1, uxs	UDP-glucuronate decarboxylase	http://www.genome.jp/dbget-bin/www_bget?ko:K08678	Q8VZC0	397	2e-37	UDP-glucuronic acid decarboxylase 1 OS=Arabidopsis thaliana OX=3702 GN=UXS1 PE=1 SV=1	PF01370//PF01073	NAD dependent epimerase/dehydratase family//3-beta hydroxysteroid dehydrogenase/isomerase family	GO:0008210//GO:0006694//GO:0008209//GO:0008207//GO:0055114	estrogen metabolic process//steroid biosynthetic process//androgen metabolic process//C21-steroid hormone metabolic process//oxidation-reduction process	GO:0050662//GO:0003854//GO:0003824//GO:0016616	obsolete coenzyme binding//3-beta-hydroxy-delta5-steroid dehydrogenase activity//catalytic activity//oxidoreductase activity, acting on the CH-OH group of donors, NAD or NADP as acceptor	--	--	KOG1429	dTDP-glucose 4-6-dehydratase/UDP-glucuronic acid decarboxylase	FALSE	-0.578415	0.566119	FALSE	0.760068	0.357601	FALSE	0.0711735	1	FALSE	-1.00414	0.185145	FALSE	-0.293879	0.84538
Cluster-11149.19749	12.2	16.27	13.84	10.1	9.59	804	1024024857	KZV39290.1	161	1.3e-08	beta-xylosidase/alpha-L-arabinofuranosidase 2-like [Dorcoceras hygrometricum]	XM_020695940.1	XM_020695940	85	5.13e-34	PREDICTED: Sesamum indicum phosphatidylserine decarboxylase proenzyme 2-like (LOC105169187), transcript variant X2, mRNA	K01613	psd, PISD	phosphatidylserine decarboxylase	http://www.genome.jp/dbget-bin/www_bget?ko:K01613	--	--	--	--	--	--	--	--	--	--	--	--	--	--	FALSE	0.898305	0.169497	FALSE	-0.322455	0.796404	FALSE	0.465077	0.485535	FALSE	0.937959	0.148189	FALSE	0.565476	0.394397
Cluster-11149.47786	1.96	5.05	6.63	5.65	4.79	448	747086933	XP_011090988.1	782	6.8e-81	UDP-glucuronic acid decarboxylase 2 [Sesamum indicum]	XM_011092686.2	XM_011092686	343	1.05e-177	PREDICTED: Sesamum indicum UDP-glucuronic acid decarboxylase 2 (LOC105171535), mRNA	K08678	UXS1, uxs	UDP-glucuronate decarboxylase	http://www.genome.jp/dbget-bin/www_bget?ko:K08678	Q9LZI2	765	2.4e-80	UDP-glucuronic acid decarboxylase 2 OS=Arabidopsis thaliana OX=3702 GN=UXS2 PE=1 SV=1	PF01370	NAD dependent epimerase/dehydratase family	--	--	GO:0003824//GO:0050662	catalytic activity//obsolete coenzyme binding	--	--	KOG1429	dTDP-glucose 4-6-dehydratase/UDP-glucuronic acid decarboxylase	FALSE	0.0760221	1	FALSE	-0.161006	1	FALSE	-0.195137	1	FALSE	-0.867404	0.579404	FALSE	-1.07643	0.301644
Cluster-11149.22899	102.47	155.07	101.28	151.65	73.29	561	629085994	KCW52351.1	661	9.2e-67	hypothetical protein EUGRSUZ_J01765 [Eucalyptus grandis]	XM_022298127.1	XM_022298127	229	3.14e-114	PREDICTED: Momordica charantia uncharacterized LOC111021244 (LOC111021244), mRNA	-	-	-	http://www.genome.jp/dbget-bin/www_bget?ko:-	--	--	--	--	PF04277//PF03839//PF02064	Oxaloacetate decarboxylase, gamma chain//Translocation protein Sec62//MAS20 protein import receptor	GO:0015031//GO:0006560//GO:0006605//GO:0036376//GO:0006525//GO:0006886//GO:0006814//GO:0006090	protein transport//proline metabolic process//protein targeting//sodium ion export across plasma membrane//arginine metabolic process//intracellular protein transport//sodium ion transport//pyruvate metabolic process	GO:0008948//GO:0015081	oxaloacetate decarboxylase activity//sodium ion transmembrane transporter activity	GO:0030176//GO:0016020//GO:0005742	integral component of endoplasmic reticulum membrane//membrane//mitochondrial outer membrane translocase complex	--	--	FALSE	0.255679	0.869797	FALSE	0.648885	0.340338	FALSE	0.793783	0.139103	FALSE	0.0945695	1	FALSE	0.693424	0.21804
Cluster-11149.29918	12.95	20.19	21.29	33.34	15.41	1312	1276239598	PIN01395.1	989	2e-104	UDP-glucose 4-epimerase/UDP-sulfoquinovose synthase [Handroanthus impetiginosus]	XM_011079117.2	XM_011079117	315	1.19e-161	PREDICTED: Sesamum indicum UDP-glucuronic acid decarboxylase 1 (LOC105161434), transcript variant X2, mRNA	K08678	UXS1, uxs	UDP-glucuronate decarboxylase	http://www.genome.jp/dbget-bin/www_bget?ko:K08678	Q8VZC0	739	7.4e-77	UDP-glucuronic acid decarboxylase 1 OS=Arabidopsis thaliana OX=3702 GN=UXS1 PE=1 SV=1	PF01370//PF01073	NAD dependent epimerase/dehydratase family//3-beta hydroxysteroid dehydrogenase/isomerase family	GO:0055114//GO:0008207//GO:0008209//GO:0008210//GO:0006694	oxidation-reduction process//C21-steroid hormone metabolic process//androgen metabolic process//estrogen metabolic process//steroid biosynthetic process	GO:0016616//GO:0003824//GO:0003854//GO:0050662	oxidoreductase activity, acting on the CH-OH group of donors, NAD or NADP as acceptor//catalytic activity//3-beta-hydroxy-delta5-steroid dehydrogenase activity//obsolete coenzyme binding	--	--	KOG1429	dTDP-glucose 4-6-dehydratase/UDP-glucuronic acid decarboxylase	FALSE	-0.519	0.523701	FALSE	0.716144	0.271886	FALSE	0.086375	1	FALSE	-0.691508	0.299549	FALSE	-0.0253687	1
Cluster-11149.25205	175.1	56.38	52.27	36.25	38.91	2339	747082360	XP_011088497.1	2293	2.2e-255	arginine decarboxylase [Sesamum indicum]	XM_011094556.2	XM_011094556	748	0	PREDICTED: Sesamum indicum arginine decarboxylase (LOC105172933), mRNA	K01583	E4.1.1.19	arginine decarboxylase	http://www.genome.jp/dbget-bin/www_bget?ko:K01583	Q43075	1943	3.2e-216	Arginine decarboxylase OS=Pisum sativum OX=3888 PE=2 SV=1	PF05393//PF02784//PF05434	Human adenovirus early E3A glycoprotein//Pyridoxal-dependent decarboxylase, pyridoxal binding domain//TMEM9	--	--	GO:0003824	catalytic activity	GO:0016021	integral component of membrane	--	--	FALSE	0.838573	0.166946	FALSE	-0.498318	0.50777	FALSE	0.229473	0.780332	UP	2.94726	7.93e-10	UP	2.39892	3.17e-07
Cluster-11149.17101	1.27	2.14	4.07	1.98	3.04	2185	1279113516	XP_022881108.1	404	2.3e-36	vesicle-associated protein 1-1-like [Olea europaea var. sylvestris]	XM_020694491.1	XM_020694491	159	1.05e-74	PREDICTED: Sesamum indicum vesicle-associated protein 1-1 (LOC105164440), mRNA	-	-	-	http://www.genome.jp/dbget-bin/www_bget?ko:-	Q8VZ95	356	3.2e-32	Vesicle-associated protein 1-1 OS=Arabidopsis thaliana OX=3702 GN=PVA11 PE=1 SV=1	PF04277	Oxaloacetate decarboxylase, gamma chain	GO:0006560//GO:0036376//GO:0006525//GO:0006090//GO:0006814	proline metabolic process//sodium ion export across plasma membrane//arginine metabolic process//pyruvate metabolic process//sodium ion transport	GO:0015081//GO:0008948	sodium ion transmembrane transporter activity//oxaloacetate decarboxylase activity	GO:0016020	membrane	KOG0439	VAMP-associated protein involved in inositol metabolism	FALSE	0.310286	0.849369	FALSE	-1.01374	0.110335	FALSE	-0.814061	0.169694	FALSE	0.0294221	1	FALSE	-1.03395	0.0861997
Cluster-11149.38653	2.55	2.22	2.67	3.12	2.05	2073	1279002909	XP_022861791.1	192	8.2e-12	uncharacterized protein LOC111382143 [Olea europaea var. sylvestris]	--	--	--	--	--	-	-	-	http://www.genome.jp/dbget-bin/www_bget?ko:-	--	--	--	--	PF01529//PF04689//PF00335//PF05648//PF04277//PF09815//PF08496//PF10278	DHHC palmitoyltransferase//DNA binding protein S1FA//Tetraspanin family//Peroxisomal biogenesis factor 11 (PEX11)//Oxaloacetate decarboxylase, gamma chain//XK-related protein//Peptidase family S49 N-terminal//Mediator of RNA pol II transcription subunit 19	GO:0006814//GO:0006355//GO:0016559//GO:0006357//GO:0006560//GO:0006090//GO:0042967//GO:0006525//GO:0036376	sodium ion transport//regulation of transcription, DNA-templated//peroxisome fission//regulation of transcription by RNA polymerase II//proline metabolic process//pyruvate metabolic process//obsolete acyl-carrier-protein biosynthetic process//arginine metabolic process//sodium ion export across plasma membrane	GO:0004252//GO:0016409//GO:0015081//GO:0008948//GO:0003677//GO:0003712	serine-type endopeptidase activity//palmitoyltransferase activity//sodium ion transmembrane transporter activity//oxaloacetate decarboxylase activity//DNA binding//transcription coregulator activity	GO:0005634//GO:0016592//GO:0005667//GO:0016021//GO:0016020//GO:0005779//GO:0005886	nucleus//mediator complex//transcription regulator complex//integral component of membrane//membrane//integral component of peroxisomal membrane//plasma membrane	--	--	FALSE	-0.28902	0.877287	FALSE	0.208985	0.930834	FALSE	-0.190639	0.889652	FALSE	0.383445	0.748519	FALSE	0.542349	0.44892
Cluster-11149.31230	0.87	1.92	2.91	3.07	2.25	499	747070273	XP_011081950.1	142	1.2e-06	3beta-hydroxysteroid-dehydrogenase/decarboxylase [Sesamum indicum]	XR_002287329.1	XR_002287329	61	6.8e-21	PREDICTED: Sesamum indicum 3beta-hydroxysteroid-dehydrogenase/decarboxylase (LOC105164848), transcript variant X3, misc_RNA	K07748	E1.1.1.170, NSDHL, ERG26	sterol-4alpha-carboxylate 3-dehydrogenase (decarboxylating)	http://www.genome.jp/dbget-bin/www_bget?ko:K07748	--	--	--	--	--	--	--	--	--	--	--	--	--	--	FALSE	-0.442652	0.973453	FALSE	0.0444775	1	FALSE	-0.507225	0.818695	FALSE	-1.15353	0.567706	FALSE	-1.15553	0.385359
Cluster-11149.26672	16.31	21.23	17.15	31.69	13.3	3594	747057321	XP_011074957.1	4561	0	FT-interacting protein 1 [Sesamum indicum]	XM_012992854.1	XM_012992854	1457	0	PREDICTED: Erythranthe guttatus protein QUIRKY-like (LOC105968229), mRNA	-	-	-	http://www.genome.jp/dbget-bin/www_bget?ko:-	Q60EW9	2718	6.7e-306	FT-interacting protein 7 OS=Oryza sativa subsp. japonica OX=39947 GN=FTIP7 PE=1 SV=1	PF04277	Oxaloacetate decarboxylase, gamma chain	GO:0006814//GO:0006090//GO:0006560//GO:0036376//GO:0006525	sodium ion transport//pyruvate metabolic process//proline metabolic process//sodium ion export across plasma membrane//arginine metabolic process	GO:0008948//GO:0015081	oxaloacetate decarboxylase activity//sodium ion transmembrane transporter activity	GO:0016020	membrane	--	--	FALSE	-0.378347	0.704731	FALSE	0.856786	0.144338	FALSE	0.367663	0.584161	FALSE	-0.282222	0.806498	FALSE	0.524546	0.387693
Cluster-11149.34962	27.48	34.22	35.77	43.19	28.24	2041	747102518	XP_011099427.1	2161	3.9e-240	cysteine desulfurase, mitochondrial [Sesamum indicum]	XM_011101125.2	XM_011101125	969	0	PREDICTED: Sesamum indicum cysteine desulfurase, mitochondrial (LOC105177856), mRNA	K04487	iscS, NFS1	cysteine desulfurase	http://www.genome.jp/dbget-bin/www_bget?ko:K04487	O49543	1839	3.2e-204	Cysteine desulfurase, mitochondrial OS=Arabidopsis thaliana OX=3702 GN=NIFS1 PE=1 SV=1	PF01212//PF00282	Beta-eliminating lyase//Pyridoxal-dependent decarboxylase conserved domain	GO:0019752//GO:0006520	carboxylic acid metabolic process//cellular amino acid metabolic process	GO:0016831//GO:0016829//GO:0030170	carboxy-lyase activity//lyase activity//pyridoxal phosphate binding	--	--	KOG1549	Cysteine desulfurase NFS1	FALSE	-0.133914	1	FALSE	0.216439	0.889457	FALSE	-0.0282484	1	FALSE	0.022153	1	FALSE	0.188583	0.856945
Cluster-11149.5719	1.13	2.17	3.64	0.92	2.96	1485	747086664	XP_011090841.1	1603	1.4e-175	S-adenosylmethionine decarboxylase proenzyme 4 [Sesamum indicum]	XM_011092539.2	XM_011092539	582	0	PREDICTED: Sesamum indicum S-adenosylmethionine decarboxylase proenzyme 4 (LOC105171423), mRNA	K01611	speD, AMD1	S-adenosylmethionine decarboxylase	http://www.genome.jp/dbget-bin/www_bget?ko:K01611	Q3E9D5	1004	1.6e-107	S-adenosylmethionine decarboxylase proenzyme 4 OS=Arabidopsis thaliana OX=3702 GN=SAMDC4 PE=1 SV=1	PF01536	Adenosylmethionine decarboxylase	GO:0008295//GO:0006597//GO:0006525//GO:0006560	spermidine biosynthetic process//spermine biosynthetic process//arginine metabolic process//proline metabolic process	GO:0004014	adenosylmethionine decarboxylase activity	--	--	KOG0788	S-adenosylmethionine decarboxylase	FALSE	1.43517	0.0435076	DOWN	-2.07333	0.00087613	FALSE	-0.748867	0.25595	FALSE	0.964787	0.300384	FALSE	-1.15757	0.0764606
Cluster-11149.26764	156.76	116.94	382.15	85.6	311.01	1709	604299215	EYU19150.1	2088	9.5e-232	hypothetical protein MIMGU_mgv1a004865mg [Erythranthe guttata]	KU640395.1	KU640395	614	0	Rehmannia glutinosa tyrosine decarboxylase (TyDC) mRNA, complete cds	K01592	E4.1.1.25	tyrosine decarboxylase	http://www.genome.jp/dbget-bin/www_bget?ko:K01592	P54768	1786	3.8e-198	Tyrosine/DOPA decarboxylase 1 OS=Papaver somniferum OX=3469 GN=TYDC1 PE=2 SV=1	PF00282//PF01212//PF00155	Pyridoxal-dependent decarboxylase conserved domain//Beta-eliminating lyase//Aminotransferase class I and II	GO:0006520//GO:0019752//GO:0009058	cellular amino acid metabolic process//carboxylic acid metabolic process//biosynthetic process	GO:0030170//GO:0016829//GO:0016831	pyridoxal phosphate binding//lyase activity//carboxy-lyase activity	--	--	KOG0628	Aromatic-L-amino-acid/L-histidine decarboxylase	FALSE	0.652746	0.342724	DOWN	-2.25777	2.62e-06	DOWN	-1.71581	0.000281188	UP	1.54663	0.00206639	FALSE	-0.761141	0.156602
Cluster-11149.7583	0.75	1.74	1.24	1.46	1.01	1491	--	--	--	--	--	--	--	--	--	--	--	--	--	--	--	--	--	--	PF04277	Oxaloacetate decarboxylase, gamma chain	GO:0006525//GO:0036376//GO:0006560//GO:0006090//GO:0006814	arginine metabolic process//sodium ion export across plasma membrane//proline metabolic process//pyruvate metabolic process//sodium ion transport	GO:0015081//GO:0008948	sodium ion transmembrane transporter activity//oxaloacetate decarboxylase activity	GO:0016020	membrane	--	--	FALSE	0.451127	0.744832	FALSE	0.143134	1	FALSE	0.483602	0.60107	FALSE	-0.286414	0.978597	FALSE	-0.192968	1
Cluster-11149.28833	198.59	138.39	436.46	94.51	361.57	861	1276242071	PIN03085.1	1005	1.8e-106	Aromatic-L-amino-acid/L-histidine decarboxylase [Handroanthus impetiginosus]	KU640395.1	KU640395	295	1.01e-150	Rehmannia glutinosa tyrosine decarboxylase (TyDC) mRNA, complete cds	K01592	E4.1.1.25	tyrosine decarboxylase	http://www.genome.jp/dbget-bin/www_bget?ko:K01592	P54768	764	6.1e-80	Tyrosine/DOPA decarboxylase 1 OS=Papaver somniferum OX=3469 GN=TYDC1 PE=2 SV=1	PF00282	Pyridoxal-dependent decarboxylase conserved domain	GO:0019752	carboxylic acid metabolic process	GO:0030170//GO:0016831	pyridoxal phosphate binding//carboxy-lyase activity	--	--	KOG0628	Aromatic-L-amino-acid/L-histidine decarboxylase	FALSE	0.760169	0.236091	DOWN	-2.33403	1.21e-06	DOWN	-1.68464	0.000383882	UP	1.7392	0.000434599	FALSE	-0.644826	0.252659
Cluster-11149.30041	161.1	50.95	44.05	32.14	36.95	1184	1276254748	PIN12738.1	883	3.5e-92	Arginine decarboxylase [Handroanthus impetiginosus]	XM_011090195.2	XM_011090195	465	0	PREDICTED: Sesamum indicum arginine decarboxylase (LOC105169707), mRNA	K01583	E4.1.1.19	arginine decarboxylase	http://www.genome.jp/dbget-bin/www_bget?ko:K01583	O23141	703	9.9e-73	Arginine decarboxylase 2 OS=Arabidopsis thaliana OX=3702 GN=ADC2 PE=1 SV=1	PF02784	Pyridoxal-dependent decarboxylase, pyridoxal binding domain	--	--	GO:0003824	catalytic activity	--	--	--	--	FALSE	0.87024	0.157124	FALSE	-0.598386	0.376663	FALSE	0.161075	0.889652	UP	2.99663	5.5e-10	UP	2.34822	6.58e-07
Cluster-11149.22928	10.97	21.1	13.77	22.34	12.03	1921	747082017	XP_011088309.1	1859	3.8e-205	uncharacterized protein LOC105169582 [Sesamum indicum]	XM_011090007.2	XM_011090007	878	0	PREDICTED: Sesamum indicum uncharacterized LOC105169582 (LOC105169582), mRNA	-	-	-	http://www.genome.jp/dbget-bin/www_bget?ko:-	--	--	--	--	PF01208	Uroporphyrinogen decarboxylase (URO-D)	GO:0006779//GO:0015994	porphyrin-containing compound biosynthetic process//chlorophyll metabolic process	GO:0004853	uroporphyrinogen decarboxylase activity	--	--	--	--	FALSE	0.119567	1	FALSE	0.496986	0.523372	FALSE	0.505778	0.411342	FALSE	-0.351956	0.750813	FALSE	0.0950209	1
Cluster-11149.34495	19.3	11.84	7.87	10.01	6.94	1923	1600626815	TEY14814.1	1000	1.5e-105	phosphopantothenoylcysteine decarboxylase [Salvia splendens]	XM_011098898.2	XM_011098898	395	0	PREDICTED: Sesamum indicum probable phosphopantothenoylcysteine decarboxylase (LOC105176139), transcript variant X2, mRNA	K01598	PPCDC, coaC	phosphopantothenoylcysteine decarboxylase	http://www.genome.jp/dbget-bin/www_bget?ko:K01598	Q9SWE5	874	2.4e-92	Phosphopantothenoylcysteine decarboxylase OS=Arabidopsis thaliana OX=3702 GN=HAL3A PE=1 SV=1	PF02441	Flavoprotein	--	--	GO:0003824	catalytic activity	--	--	KOG0672	Halotolerance protein HAL3 (contains flavoprotein domain)	FALSE	0.444212	0.614528	FALSE	0.131482	1	FALSE	0.464924	0.458853	UP	1.62136	0.00150081	UP	1.70276	0.000503349
Cluster-11149.27921	18.76	19.74	13	14.21	11.56	4653	1276250709	PIN09573.1	2378	6.1e-265	Phosphatidylserine decarboxylase [Handroanthus impetiginosus]	XM_011089530.2	XM_011089530	1076	0	PREDICTED: Sesamum indicum phosphatidylserine decarboxylase proenzyme 2-like (LOC105169187), transcript variant X1, mRNA	K01613	psd, PISD	phosphatidylserine decarboxylase	http://www.genome.jp/dbget-bin/www_bget?ko:K01613	F4KAK5	1963	3.1e-218	Phosphatidylserine decarboxylase proenzyme 2 OS=Arabidopsis thaliana OX=3702 GN=PSD2 PE=2 SV=1	PF00036//PF04614//PF13405//PF13499//PF02666//PF13202	EF hand//Pex19 protein family//EF-hand domain//EF-hand domain pair//Phosphatidylserine decarboxylase//EF hand	GO:0008654//GO:0006544//GO:0046486//GO:0006563//GO:0006566	phospholipid biosynthetic process//glycine metabolic process//glycerolipid metabolic process//L-serine metabolic process//threonine metabolic process	GO:0005509//GO:0004609	calcium ion binding//phosphatidylserine decarboxylase activity	GO:0005777	peroxisome	KOG2419	Phosphatidylserine decarboxylase	FALSE	0.673548	0.319226	FALSE	-0.098092	1	FALSE	0.464675	0.441562	FALSE	1.07725	0.0503831	FALSE	0.92914	0.0719433
Cluster-11149.17814	29.42	24.53	40.97	68.48	39.24	867	848889853	XP_012845079.1	778	3.8e-80	PREDICTED: glutamate decarboxylase [Erythranthe guttata]	KC834746.1	KC834746	227	6.41e-113	Scutellaria baicalensis glutamate decarboxylase 2 (GAD2) mRNA, complete cds	K01580	E4.1.1.15, gadB, gadA, GAD	glutamate decarboxylase	http://www.genome.jp/dbget-bin/www_bget?ko:K01580	Q42521	683	1.5e-70	Glutamate decarboxylase 1 OS=Arabidopsis thaliana OX=3702 GN=GAD1 PE=1 SV=2	PF00282	Pyridoxal-dependent decarboxylase conserved domain	GO:0019752	carboxylic acid metabolic process	GO:0030170//GO:0016831	pyridoxal phosphate binding//carboxy-lyase activity	--	--	--	--	FALSE	-1.271	0.0194088	FALSE	0.404877	0.633757	FALSE	-0.976833	0.0619218	FALSE	-0.550742	0.458975	FALSE	-0.19586	0.847888
Cluster-11149.31918	13.12	21.77	21.76	27.06	21.15	1884	747101450	XP_011098858.1	438	2.2e-40	ribulose-phosphate 3-epimerase, cytoplasmic isoform [Sesamum indicum]	XM_011100557.2	XM_011100557	215	6.67e-106	PREDICTED: Sesamum indicum ribulose-phosphate 3-epimerase, cytoplasmic isoform (LOC105177413), transcript variant X2, mRNA	K01783	rpe, RPE	ribulose-phosphate 3-epimerase	http://www.genome.jp/dbget-bin/www_bget?ko:K01783	Q9SE42	400	2.2e-37	Ribulose-phosphate 3-epimerase, cytoplasmic isoform OS=Oryza sativa subsp. japonica OX=39947 GN=Os09g0505700 PE=1 SV=1	PF00834//PF00215	Ribulose-phosphate 3 epimerase family//Orotidine 5'-phosphate decarboxylase / HUMPS family	GO:0006206//GO:0006207//GO:0005975	pyrimidine nucleobase metabolic process//'de novo' pyrimidine nucleobase biosynthetic process//carbohydrate metabolic process	GO:0004590//GO:0016857	orotidine-5'-phosphate decarboxylase activity//racemase and epimerase activity, acting on carbohydrates and derivatives	--	--	KOG3111	D-ribulose-5-phosphate 3-epimerase	FALSE	-0.111793	1	FALSE	-0.0411159	1	FALSE	-0.263673	0.724685	FALSE	-0.370267	0.731603	FALSE	-0.461369	0.461229
Cluster-11149.34404	7.25	5.13	3.43	6.73	3.35	2060	--	--	--	--	--	--	--	--	--	--	K01613	psd, PISD	phosphatidylserine decarboxylase	http://www.genome.jp/dbget-bin/www_bget?ko:K01613	--	--	--	--	--	--	--	--	--	--	--	--	--	--	FALSE	-0.189274	0.986331	FALSE	0.610349	0.404817	FALSE	0.310348	0.705108	FALSE	0.780675	0.232105	FALSE	1.34088	0.00984351
Cluster-11149.36941	2.14	1.33	0.88	0.91	0.87	947	--	--	--	--	--	--	--	--	--	--	--	--	--	--	--	--	--	--	PF03709	Orn/Lys/Arg decarboxylase, N-terminal domain	--	--	GO:0016831	carboxy-lyase activity	--	--	--	--	FALSE	0.74406	0.65103	FALSE	-0.322356	1	FALSE	0.311177	0.885418	FALSE	1.89091	0.0138199	FALSE	1.51761	0.0542787
Cluster-17000.0	0.6	1.58	0.36	0.24	0.36	609	747069073	XP_011081318.1	198	4.8e-13	phosphatidylserine decarboxylase proenzyme 1, mitochondrial [Sesamum indicum]	XM_012971905.1	XM_012971905	100	1.76e-42	PREDICTED: Erythranthe guttatus phosphatidylserine decarboxylase proenzyme 1, mitochondrial (LOC105948675), mRNA	K01613	psd, PISD	phosphatidylserine decarboxylase	http://www.genome.jp/dbget-bin/www_bget?ko:K01613	Q84V22	166	9.4e-11	Phosphatidylserine decarboxylase proenzyme 1, mitochondrial OS=Arabidopsis thaliana OX=3702 GN=PSD1 PE=2 SV=1	PF02666	Phosphatidylserine decarboxylase	GO:0046486//GO:0006563//GO:0006566//GO:0008654//GO:0006544	glycerolipid metabolic process//L-serine metabolic process//threonine metabolic process//phospholipid biosynthetic process//glycine metabolic process	GO:0004609	phosphatidylserine decarboxylase activity	--	--	KOG2420	Phosphatidylserine decarboxylase	FALSE	2.88172	0.0633157	FALSE	-0.960237	1	FALSE	1.80558	0.148606	FALSE	1.92173	0.378347	FALSE	0.91175	0.939472
Cluster-11149.7303	0.62	0.95	0.31	2.34	0.31	526	1340517515	XP_023739370.1	138	3.8e-06	UDP-glucuronic acid decarboxylase 1-like isoform X1 [Lactuca sativa]	XM_025118087.1	XM_025118087	53	2.01e-16	PREDICTED: Cynara cardunculus var. scolymus UDP-glucuronic acid decarboxylase 1 (LOC112512217), mRNA	K08678	UXS1, uxs	UDP-glucuronate decarboxylase	http://www.genome.jp/dbget-bin/www_bget?ko:K08678	Q8VZC0	128	2.1e-06	UDP-glucuronic acid decarboxylase 1 OS=Arabidopsis thaliana OX=3702 GN=UXS1 PE=1 SV=1	--	--	--	--	--	--	--	--	KOG1429	dTDP-glucose 4-6-dehydratase/UDP-glucuronic acid decarboxylase	FALSE	-1.06296	0.576666	FALSE	2.43988	0.153391	FALSE	1.26647	0.517719	FALSE	-1.227	0.487968	FALSE	1.15246	0.902688
Cluster-11149.26403	4.77	9.47	6.31	9.36	6.31	2529	1276238648	PIN00768.1	1226	1.3e-131	hypothetical protein CDL12_26728 [Handroanthus impetiginosus]	XM_011091961.2	XM_011091961	620	0	PREDICTED: Sesamum indicum protein DGS1, mitochondrial (LOC105170983), transcript variant X2, mRNA	K18158	NCA2	nuclear control of ATPase protein 2	http://www.genome.jp/dbget-bin/www_bget?ko:K18158	Q8GUK1	908	3.6e-96	Protein DGS1, mitochondrial OS=Arabidopsis thaliana OX=3702 GN=DGS1 PE=1 SV=1	PF05870	Phenolic acid decarboxylase (PAD)	--	--	GO:0016831	carboxy-lyase activity	--	--	--	--	FALSE	0.217971	0.9442	FALSE	0.172043	0.958254	FALSE	0.27925	0.712386	FALSE	-0.298039	0.806498	FALSE	-0.175979	0.892761
Cluster-11149.30757	3.95	7.3	3.81	12.56	3.88	1815	1024013999	KZV34880.1	612	1.4e-60	selenium-binding protein 2 [Dorcoceras hygrometricum]	XM_011103792.2	XM_011103792	256	1.04e-128	PREDICTED: Sesamum indicum selenium-binding protein 2-like (LOC105180140), mRNA	K17285	SELENBP1	selenium-binding protein 1	http://www.genome.jp/dbget-bin/www_bget?ko:K17285	O23264	550	8.4e-55	Selenium-binding protein 1 OS=Arabidopsis thaliana OX=3702 GN=SBP1 PE=1 SV=1	PF05694//PF04277//PF00632//PF02290//PF04647//PF05104//PF08496//PF08208	56kDa selenium binding protein (SBP56)//Oxaloacetate decarboxylase, gamma chain//HECT-domain (ubiquitin-transferase)//Signal recognition particle 14kD protein//Accessory gene regulator B//Ribosome receptor lysine/proline rich region//Peptidase family S49 N-terminal//DNA-directed RNA polymerase I subunit RPA34.5	GO:0015031//GO:0006525//GO:0036376//GO:0009405//GO:0006090//GO:0006360//GO:0009372//GO:0006560//GO:0016567//GO:0006814//GO:0006614	protein transport//arginine metabolic process//sodium ion export across plasma membrane//pathogenesis//pyruvate metabolic process//transcription by RNA polymerase I//quorum sensing//proline metabolic process//protein ubiquitination//sodium ion transport//SRP-dependent cotranslational protein targeting to membrane	GO:0004842//GO:0008948//GO:0008312//GO:0008233//GO:0015081//GO:0030942//GO:0008430//GO:0004252	ubiquitin-protein transferase activity//oxaloacetate decarboxylase activity//7S RNA binding//peptidase activity//sodium ion transmembrane transporter activity//endoplasmic reticulum signal peptide binding//selenium binding//serine-type endopeptidase activity	GO:0005786//GO:0005886//GO:0016021//GO:0030176//GO:0016020	signal recognition particle, endoplasmic reticulum targeting//plasma membrane//integral component of membrane//integral component of endoplasmic reticulum membrane//membrane	KOG0918	Selenium-binding protein	FALSE	-0.579754	0.452563	FALSE	1.29934	0.0186809	FALSE	0.608841	0.314069	FALSE	-0.994604	0.0960411	FALSE	0.254679	0.785879
Cluster-11149.26587	7.59	7.95	7.19	14.45	7.62	2976	747095386	XP_011095567.1	662	3.7e-66	uncharacterized protein LOC105174980 [Sesamum indicum]	XM_011097265.2	XM_011097265	288	2.79e-146	PREDICTED: Sesamum indicum uncharacterized LOC105174980 (LOC105174980), mRNA	-	-	-	http://www.genome.jp/dbget-bin/www_bget?ko:-	C5DZI5	147	7.4e-08	Altered inheritance of mitochondria protein 32 OS=Zygosaccharomyces rouxii (strain ATCC 2623 / CBS 732 / NBRC 1130 / NCYC 568 / NRRL Y-229) OX=559307 GN=AIM32 PE=3 SV=1	PF13741//PF02511//PF04277	Mitochondrial ribosomal protein S25//Thymidylate synthase complementing protein//Oxaloacetate decarboxylase, gamma chain	GO:0006814//GO:0006560//GO:0006231//GO:0006206//GO:0042254//GO:0006090//GO:0036376//GO:0006525	sodium ion transport//proline metabolic process//dTMP biosynthetic process//pyrimidine nucleobase metabolic process//ribosome biogenesis//pyruvate metabolic process//sodium ion export across plasma membrane//arginine metabolic process	GO:0003735//GO:0050660//GO:0050797//GO:0015081//GO:0008948	structural constituent of ribosome//flavin adenine dinucleotide binding//thymidylate synthase (FAD) activity//sodium ion transmembrane transporter activity//oxaloacetate decarboxylase activity	GO:0005763//GO:0016020//GO:0005840	mitochondrial small ribosomal subunit//membrane//ribosome	--	--	FALSE	-0.662275	0.342991	FALSE	0.528197	0.480933	FALSE	-0.244825	0.765072	FALSE	-0.252854	0.846318	FALSE	0.225329	0.81059
Cluster-11149.26379	84.18	93.36	105.27	39.38	112.06	3326	747079674	XP_011087052.1	777	1.9e-79	organic cation/carnitine transporter 3-like [Sesamum indicum]	--	--	--	--	--	-	-	-	http://www.genome.jp/dbget-bin/www_bget?ko:-	Q9SA38	614	5.8e-62	Organic cation/carnitine transporter 3 OS=Arabidopsis thaliana OX=3702 GN=OCT3 PE=2 SV=1	PF01239//PF07690//PF00083//PF04277//PF05028	Protein prenyltransferase alpha subunit repeat//Major Facilitator Superfamily//Sugar (and other) transporter//Oxaloacetate decarboxylase, gamma chain//Poly (ADP-ribose) glycohydrolase (PARG)	GO:0006560//GO:0036376//GO:0006525//GO:0055085//GO:0018342//GO:0005975//GO:0006090//GO:0006814	proline metabolic process//sodium ion export across plasma membrane//arginine metabolic process//transmembrane transport//protein prenylation//carbohydrate metabolic process//pyruvate metabolic process//sodium ion transport	GO:0008318//GO:0022857//GO:0015081//GO:0004649//GO:0008948	protein prenyltransferase activity//transmembrane transporter activity//sodium ion transmembrane transporter activity//poly(ADP-ribose) glycohydrolase activity//oxaloacetate decarboxylase activity	GO:0016020//GO:0016021	membrane//integral component of membrane	KOG0255	Synaptic vesicle transporter SVOP and related transporters (major facilitator superfamily)	UP	1.44537	0.00494004	DOWN	-1.90459	9.31e-05	FALSE	-0.570005	0.313947	UP	1.772	0.000315289	FALSE	-0.182592	0.861337
Cluster-11149.16461	4.64	6.28	5.62	13.7	6.02	1673	747062053	XP_011077517.1	696	2.4e-70	PRA1 family protein B2 [Sesamum indicum]	XM_012976765.1	XM_012976765	399	0	PREDICTED: Erythranthe guttatus PRA1 family protein B4 (LOC105953135), mRNA	-	-	-	http://www.genome.jp/dbget-bin/www_bget?ko:-	O80915	486	2e-47	PRA1 family protein B4 OS=Arabidopsis thaliana OX=3702 GN=PRA1B4 PE=1 SV=1	PF03977//PF04140//PF07178	Na+-transporting oxaloacetate decarboxylase beta subunit//Isoprenylcysteine carboxyl methyltransferase (ICMT) family//TraL protein	GO:0006814//GO:0006479//GO:0000746//GO:0006481	sodium ion transport//protein methylation//conjugation//C-terminal protein methylation	GO:0004671//GO:0016829	protein C-terminal S-isoprenylcysteine carboxyl O-methyltransferase activity//lyase activity	GO:0019867//GO:0016021	outer membrane//integral component of membrane	--	--	FALSE	-0.922122	0.140684	FALSE	0.79015	0.217	FALSE	-0.242661	0.788328	FALSE	-0.886654	0.14957	FALSE	-0.146491	0.959086
Cluster-11149.8467	3.57	2.53	5.21	1.6	5.65	754	747051649	XP_011071914.1	406	4.6e-37	oleosin 18.2 kDa-like [Sesamum indicum]	--	--	--	--	--	-	-	-	http://www.genome.jp/dbget-bin/www_bget?ko:-	C3S7F0	252	1.3e-20	Oleosin S1-2 OS=Brassica napus OX=3708 GN=S1 PE=1 SV=1	PF01277//PF03186	Oleosin//CobD/Cbib protein	GO:0009236	cobalamin biosynthetic process	GO:0048472	threonine-phosphate decarboxylase activity	GO:0012511//GO:0016021	monolayer-surrounded lipid storage body//integral component of membrane	--	--	FALSE	0.869284	0.398916	DOWN	-2.21261	0.000794104	FALSE	-1.45362	0.0212442	FALSE	1.81533	0.0111039	FALSE	-0.446387	0.607509
Cluster-11149.22149	18.84	24.15	22.01	21.25	24.24	2141	747082935	XP_011088814.1	1479	4.9e-161	aspartic proteinase-like protein 2 [Sesamum indicum]	XM_011090512.2	XM_011090512	770	0	PREDICTED: Sesamum indicum aspartic proteinase-like protein 2 (LOC105169960), mRNA	-	-	-	http://www.genome.jp/dbget-bin/www_bget?ko:-	Q9S9K4	536	4.2e-53	Aspartic proteinase-like protein 2 OS=Arabidopsis thaliana OX=3702 GN=At1g65240 PE=3 SV=2	PF04277	Oxaloacetate decarboxylase, gamma chain	GO:0006525//GO:0036376//GO:0006560//GO:0006814//GO:0006090	arginine metabolic process//sodium ion export across plasma membrane//proline metabolic process//sodium ion transport//pyruvate metabolic process	GO:0008948//GO:0015081	oxaloacetate decarboxylase activity//sodium ion transmembrane transporter activity	GO:0016020	membrane	--	--	FALSE	0.385729	0.697682	FALSE	-0.58614	0.387847	FALSE	-0.311182	0.672083	FALSE	0.500561	0.530013	FALSE	-0.135575	0.940339
Cluster-11149.2142	0.09	0	0.66	1	0.74	715	--	--	--	--	--	--	--	--	--	--	--	--	--	--	--	--	--	--	PF04277	Oxaloacetate decarboxylase, gamma chain	GO:0006525//GO:0036376//GO:0006560//GO:0006090//GO:0006814	arginine metabolic process//sodium ion export across plasma membrane//proline metabolic process//pyruvate metabolic process//sodium ion transport	GO:0015081//GO:0008948	sodium ion transmembrane transporter activity//oxaloacetate decarboxylase activity	GO:0016020	membrane	--	--	FALSE	-6.35128	0.0263893	FALSE	0.0343308	1	FALSE	-6.16242	0.0233754	FALSE	-2.66781	0.277538	FALSE	-2.66078	0.138309
Cluster-11149.30687	37.58	71.69	62.52	70.83	71.19	689	848902281	XP_012851106.1	625	1.7e-62	PREDICTED: UDP-glucuronic acid decarboxylase 5-like [Erythranthe guttata]	XM_011095509.2	XM_011095509	289	1.73e-147	PREDICTED: Sesamum indicum UDP-glucuronic acid decarboxylase 6-like (LOC105173667), mRNA	K08678	UXS1, uxs	UDP-glucuronate decarboxylase	http://www.genome.jp/dbget-bin/www_bget?ko:K08678	Q9ZV36	553	1.4e-55	UDP-glucuronic acid decarboxylase 6 OS=Arabidopsis thaliana OX=3702 GN=UXS6 PE=2 SV=1	PF01370	NAD dependent epimerase/dehydratase family	--	--	GO:0050662//GO:0003824	obsolete coenzyme binding//catalytic activity	--	--	KOG1429	dTDP-glucose 4-6-dehydratase/UDP-glucuronic acid decarboxylase	FALSE	0.232707	0.913316	FALSE	-0.406353	0.631633	FALSE	-0.28441	0.705108	FALSE	-0.249467	0.856989	FALSE	-0.705787	0.207311
Cluster-11149.30686	10.14	28.35	25.2	40.66	29.22	1326	747106911	XP_011101753.1	311	8.3e-26	UDP-glucuronic acid decarboxylase 6 [Sesamum indicum]	XM_020691897.1	XM_020691897	125	5e-56	PREDICTED: Sesamum indicum UDP-glucuronic acid decarboxylase 5-like (LOC105156486), transcript variant X7, mRNA	K08678	UXS1, uxs	UDP-glucuronate decarboxylase	http://www.genome.jp/dbget-bin/www_bget?ko:K08678	Q9SN95	258	4.4e-21	UDP-glucuronic acid decarboxylase 5 OS=Arabidopsis thaliana OX=3702 GN=UXS5 PE=2 SV=1	PF06005	Cell division protein ZapB	GO:0043093//GO:0090529	FtsZ-dependent cytokinesis//cell septum assembly	--	--	GO:0005737	cytoplasm	KOG1429	dTDP-glucose 4-6-dehydratase/UDP-glucuronic acid decarboxylase	FALSE	-0.315221	0.817859	FALSE	0.0795778	1	FALSE	-0.346402	0.617213	FALSE	-1.3307	0.012486	FALSE	-1.30105	0.00999686
Cluster-11149.29573	13.59	20.35	17.85	30.05	20.85	3087	1276237478	PIN00047.1	1747	5.9e-192	Molecular chaperone (DnaJ superfamily) [Handroanthus impetiginosus]	XM_020697697.1	XM_020697697	841	0	PREDICTED: Sesamum indicum dnaJ protein ERDJ2-like (LOC105174105), mRNA	K09540	SEC63, DNAJC23	translocation protein SEC63	http://www.genome.jp/dbget-bin/www_bget?ko:K09540	Q0WT48	1450	6.2e-159	DnaJ protein ERDJ2A OS=Arabidopsis thaliana OX=3702 GN=ERDJ2A PE=1 SV=1	PF12679//PF04277//PF04335	ABC-2 family transporter protein//Oxaloacetate decarboxylase, gamma chain//VirB8 protein	GO:0006814//GO:0006090//GO:0006525//GO:0055085//GO:0006560//GO:0036376	sodium ion transport//pyruvate metabolic process//arginine metabolic process//transmembrane transport//proline metabolic process//sodium ion export across plasma membrane	GO:0008948//GO:0015081	oxaloacetate decarboxylase activity//sodium ion transmembrane transporter activity	GO:0016020	membrane	KOG0721	Molecular chaperone (DnaJ superfamily)	FALSE	-0.361955	0.736986	FALSE	0.131359	1	FALSE	-0.341366	0.618668	FALSE	-0.468547	0.557126	FALSE	-0.387186	0.566637
Cluster-11149.23419	23.23	35.91	31.68	39.23	37.63	3997	1173780558	XP_020554548.1	988	7.9e-104	serine decarboxylase-like [Sesamum indicum]	XM_020698889.1	XM_020698889	396	0	PREDICTED: Sesamum indicum serine decarboxylase-like (LOC105179517), transcript variant X2, mRNA	K01590	hdc, HDC	histidine decarboxylase	http://www.genome.jp/dbget-bin/www_bget?ko:K01590	Q9MA74	949	1e-100	Serine decarboxylase OS=Arabidopsis thaliana OX=3702 GN=SDC PE=1 SV=1	PF00282//PF01276	Pyridoxal-dependent decarboxylase conserved domain//Orn/Lys/Arg decarboxylase, major domain	GO:0019752	carboxylic acid metabolic process	GO:0016831//GO:0003824//GO:0030170	carboxy-lyase activity//catalytic activity//pyridoxal phosphate binding	--	--	--	--	FALSE	0.0719275	1	FALSE	-0.335403	0.725616	FALSE	-0.374254	0.569718	FALSE	-0.0793889	1	FALSE	-0.464794	0.44892
Cluster-11149.10908	3.33	2.38	2.01	3.54	2.4	393	--	--	--	--	--	XM_020695940.1	XM_020695940	52	5.3e-16	PREDICTED: Sesamum indicum phosphatidylserine decarboxylase proenzyme 2-like (LOC105169187), transcript variant X2, mRNA	--	--	--	--	--	--	--	--	--	--	--	--	--	--	--	--	--	--	FALSE	-0.317017	1	FALSE	0.158315	1	FALSE	-0.267357	0.999976	FALSE	0.547919	0.806498	FALSE	0.655275	0.665559
Cluster-11149.40357	11.99	17.14	15.57	19.91	18.62	2374	604344918	EYU43564.1	655	1.9e-65	hypothetical protein MIMGU_mgv1a010369mg [Erythranthe guttata]	XM_011085103.2	XM_011085103	274	1.34e-138	PREDICTED: Sesamum indicum phosphopantothenate--cysteine ligase 2 (LOC105165946), transcript variant X2, mRNA	K01922	PPCS, coaB	phosphopantothenate-cysteine ligase	http://www.genome.jp/dbget-bin/www_bget?ko:K01922	Q9LZM3	537	3.5e-53	Phosphopantothenate--cysteine ligase 2 OS=Arabidopsis thaliana OX=3702 GN=PPCS2 PE=2 SV=2	--	--	--	--	--	--	--	--	KOG2728	Uncharacterized conserved protein with similarity to phosphopantothenoylcysteine synthetase/decarboxylase	FALSE	-0.0144504	1	FALSE	-0.299994	0.792763	FALSE	-0.425208	0.502744	FALSE	-0.0558989	1	FALSE	-0.405881	0.541154
Cluster-11149.38261	21.39	25.6	80.57	2.94	96.88	712	1600650917	TEY34079.1	406	4.3e-37	aquaporin PIP [Salvia splendens]	FQ381028.1	FQ381028	123	3.4e-55	Vitis vinifera clone SS0ACG1YK03	K09872	PIP	aquaporin PIP	http://www.genome.jp/dbget-bin/www_bget?ko:K09872	Q9FF53	351	3.9e-32	Probable aquaporin PIP2-4 OS=Arabidopsis thaliana OX=3702 GN=PIP2-4 PE=1 SV=1	PF04277//PF05434//PF00230	Oxaloacetate decarboxylase, gamma chain//TMEM9//Major intrinsic protein	GO:0006814//GO:0006090//GO:0006810//GO:0006525//GO:0055085//GO:0036376//GO:0006560	sodium ion transport//pyruvate metabolic process//transport//arginine metabolic process//transmembrane transport//sodium ion export across plasma membrane//proline metabolic process	GO:0008948//GO:0015081//GO:0015267	oxaloacetate decarboxylase activity//sodium ion transmembrane transporter activity//channel activity	GO:0016021//GO:0016020	integral component of membrane//membrane	--	--	UP	3.33273	1.57e-09	DOWN	-5.4366	1.75e-21	DOWN	-2.21485	3.83e-06	UP	3.52399	1.77e-10	DOWN	-1.96206	5.19e-05
Cluster-11149.17390	15.95	38.32	33.65	41.04	40.8	1232	1527522452	XP_027111029.1	1172	1.1e-125	UDP-glucuronic acid decarboxylase 6-like isoform X1 [Coffea arabica]	XM_011095506.2	XM_011095506	540	0	PREDICTED: Sesamum indicum UDP-glucuronic acid decarboxylase 6-like (LOC105173665), transcript variant X1, mRNA	K08678	UXS1, uxs	UDP-glucuronate decarboxylase	http://www.genome.jp/dbget-bin/www_bget?ko:K08678	Q9ZV36	1097	2.1e-118	UDP-glucuronic acid decarboxylase 6 OS=Arabidopsis thaliana OX=3702 GN=UXS6 PE=2 SV=1	PF01370//PF01073//PF03435//PF02254	NAD dependent epimerase/dehydratase family//3-beta hydroxysteroid dehydrogenase/isomerase family//Saccharopine dehydrogenase NADP binding domain//TrkA-N domain	GO:0008207//GO:0055114//GO:0006813//GO:0008210//GO:0006694//GO:0008209	C21-steroid hormone metabolic process//oxidation-reduction process//potassium ion transport//estrogen metabolic process//steroid biosynthetic process//androgen metabolic process	GO:0016491//GO:0003854//GO:0016616//GO:0003824//GO:0050662	oxidoreductase activity//3-beta-hydroxy-delta5-steroid dehydrogenase activity//oxidoreductase activity, acting on the CH-OH group of donors, NAD or NADP as acceptor//catalytic activity//obsolete coenzyme binding	--	--	KOG1429	dTDP-glucose 4-6-dehydratase/UDP-glucuronic acid decarboxylase	FALSE	0.106052	1	FALSE	-0.388549	0.660889	FALSE	-0.393263	0.545337	FALSE	-0.691677	0.294996	FALSE	-1.13018	0.0262911
Cluster-11149.24150	8.29	21.2	40.9	27.67	50.06	3561	1276248475	PIN07818.1	1459	1.7e-158	Cytochrome P450 CYP2 subfamily [Handroanthus impetiginosus]	XM_011091230.2	XM_011091230	577	0	PREDICTED: Sesamum indicum trans-cinnamate 4-monooxygenase (LOC105170468), mRNA	K00487	CYP73A	trans-cinnamate 4-monooxygenase	http://www.genome.jp/dbget-bin/www_bget?ko:K00487	P48522	1409	4.1e-154	Trans-cinnamate 4-monooxygenase OS=Catharanthus roseus OX=4058 GN=CYP73A4 PE=2 SV=1	PF00067//PF04277	Cytochrome P450//Oxaloacetate decarboxylase, gamma chain	GO:0036376//GO:0006560//GO:0006525//GO:0055114//GO:0006090//GO:0006814	sodium ion export across plasma membrane//proline metabolic process//arginine metabolic process//oxidation-reduction process//pyruvate metabolic process//sodium ion transport	GO:0020037//GO:0016705//GO:0015081//GO:0005506//GO:0008948	heme binding//oxidoreductase activity, acting on paired donors, with incorporation or reduction of molecular oxygen//sodium ion transmembrane transporter activity//iron ion binding//oxaloacetate decarboxylase activity	GO:0016020	membrane	--	--	FALSE	-0.184371	0.977367	FALSE	-1.251	0.0168148	DOWN	-1.54614	0.00122803	FALSE	-1.06317	0.0568949	DOWN	-2.36413	5.65e-07
Cluster-16731.0	3.08	3.5	0.8	0.4	0.98	460	1052139342	AOC38014.1	714	5.4e-73	tyrosine decarboxylase [Rehmannia glutinosa]	KU640395.1	KU640395	391	0	Rehmannia glutinosa tyrosine decarboxylase (TyDC) mRNA, complete cds	K01592	E4.1.1.25	tyrosine decarboxylase	http://www.genome.jp/dbget-bin/www_bget?ko:K01592	P54769	602	2e-61	Tyrosine/DOPA decarboxylase 2 OS=Papaver somniferum OX=3469 GN=TYDC2 PE=2 SV=1	PF00365//PF00155//PF00282	Phosphofructokinase//Aminotransferase class I and II//Pyridoxal-dependent decarboxylase conserved domain	GO:0006094//GO:0019752//GO:0006012//GO:0006096//GO:0006013//GO:0006098//GO:0009058//GO:0006000	gluconeogenesis//carboxylic acid metabolic process//galactose metabolic process//glycolytic process//mannose metabolic process//pentose-phosphate shunt//biosynthetic process//fructose metabolic process	GO:0003872//GO:0030170//GO:0016831	6-phosphofructokinase activity//pyridoxal phosphate binding//carboxy-lyase activity	GO:0005945	6-phosphofructokinase complex	KOG0628	Aromatic-L-amino-acid/L-histidine decarboxylase	FALSE	3.2658	0.0167668	FALSE	-1.61371	0.794971	FALSE	1.5367	0.145396	UP	3.48844	0.00448368	FALSE	1.82579	0.0877113
Cluster-11149.32970	19.26	37.84	31.71	81.28	39.2	1020	747065992	XP_011079661.1	775	1e-79	UDP-glucuronic acid decarboxylase 2-like [Sesamum indicum]	XM_011081359.2	XM_011081359	325	2.53e-167	PREDICTED: Sesamum indicum UDP-glucuronic acid decarboxylase 2-like (LOC105163124), mRNA	K08678	UXS1, uxs	UDP-glucuronate decarboxylase	http://www.genome.jp/dbget-bin/www_bget?ko:K08678	Q8S8T4	730	6.3e-76	UDP-glucuronic acid decarboxylase 4 OS=Arabidopsis thaliana OX=3702 GN=UXS4 PE=2 SV=1	PF01370	NAD dependent epimerase/dehydratase family	--	--	GO:0050662//GO:0003824	obsolete coenzyme binding//catalytic activity	--	--	KOG1429	dTDP-glucose 4-6-dehydratase/UDP-glucuronic acid decarboxylase	FALSE	-0.895419	0.138884	FALSE	0.654213	0.329364	FALSE	-0.35196	0.606324	FALSE	-1.40722	0.00704627	FALSE	-0.802978	0.143485
Cluster-11149.22660	5.28	8.78	7.89	24.51	9.87	1806	1276254490	PIN12525.1	1902	3.7e-210	C-3 sterol dehydrogenase/3-beta-hydroxysteroid dehydrogenase [Handroanthus impetiginosus]	XM_012991768.1	XM_012991768	780	0	PREDICTED: Erythranthe guttatus 3beta-hydroxysteroid-dehydrogenase/decarboxylase isoform 2 (LOC105967180), mRNA	K07748	E1.1.1.170, NSDHL, ERG26	sterol-4alpha-carboxylate 3-dehydrogenase (decarboxylating)	http://www.genome.jp/dbget-bin/www_bget?ko:K07748	Q67ZE1	1673	5e-185	3beta-hydroxysteroid-dehydrogenase/decarboxylase isoform 2 OS=Arabidopsis thaliana OX=3702 GN=3BETAHSD/D2 PE=2 SV=2	PF07822//PF01073//PF01370	Neurotoxin B-IV-like protein//3-beta hydroxysteroid dehydrogenase/isomerase family//NAD dependent epimerase/dehydratase family	GO:0008210//GO:0006694//GO:0009405//GO:0008209//GO:0006810//GO:0008207//GO:0055114	estrogen metabolic process//steroid biosynthetic process//pathogenesis//androgen metabolic process//transport//C21-steroid hormone metabolic process//oxidation-reduction process	GO:0019871//GO:0050662//GO:0003854//GO:0003824//GO:0016616	sodium channel inhibitor activity//obsolete coenzyme binding//3-beta-hydroxy-delta5-steroid dehydrogenase activity//catalytic activity//oxidoreductase activity, acting on the CH-OH group of donors, NAD or NADP as acceptor	GO:0005576	extracellular region	KOG1430	C-3 sterol dehydrogenase/3-beta-hydroxysteroid dehydrogenase and related dehydrogenases	FALSE	-1.27797	0.019379	FALSE	0.915944	0.118153	FALSE	-0.472742	0.448512	DOWN	-1.54046	0.00318712	FALSE	-0.674472	0.251712
Cluster-11149.23355	14.78	10.55	17.51	31.38	21.91	2287	747077552	XP_011085900.1	1156	1.5e-123	glutamate decarboxylase [Sesamum indicum]	XM_011101613.2	XM_011101613	417	0	PREDICTED: Sesamum indicum glutamate decarboxylase (LOC105178200), mRNA	-	-	-	http://www.genome.jp/dbget-bin/www_bget?ko:-	Q07346	1141	3.1e-123	Glutamate decarboxylase OS=Petunia hybrida OX=4102 GN=GAD PE=1 SV=1	PF05706//PF00282//PF04625	Cyclin-dependent kinase inhibitor 3 (CDKN3)//Pyridoxal-dependent decarboxylase conserved domain//DEC-1 protein, N-terminal region	GO:0019752//GO:0006470//GO:0007304//GO:0006570	carboxylic acid metabolic process//protein dephosphorylation//chorion-containing eggshell formation//tyrosine metabolic process	GO:0004721//GO:0016831//GO:0005213//GO:0004725//GO:0030170	phosphoprotein phosphatase activity//carboxy-lyase activity//structural constituent of egg chorion//protein tyrosine phosphatase activity//pyridoxal phosphate binding	GO:0005576//GO:0042600	extracellular region//egg chorion	KOG1383	Glutamate decarboxylase/sphingosine phosphate lyase	FALSE	-1.37123	0.00956474	FALSE	0.121984	1	FALSE	-1.35998	0.00583218	FALSE	-0.411008	0.65398	FALSE	-0.33902	0.641042
Cluster-11149.13117	7.34	16.56	15.52	21.61	19.82	901	747078791	XP_011086572.1	410	1.9e-37	uncharacterized protein LOC105168261 [Sesamum indicum]	XM_011088270.2	XM_011088270	190	2.47e-92	PREDICTED: Sesamum indicum uncharacterized LOC105168261 (LOC105168261), mRNA	-	-	-	http://www.genome.jp/dbget-bin/www_bget?ko:-	--	--	--	--	PF04277	Oxaloacetate decarboxylase, gamma chain	GO:0006814//GO:0006090//GO:0006525//GO:0006560//GO:0036376	sodium ion transport//pyruvate metabolic process//arginine metabolic process//proline metabolic process//sodium ion export across plasma membrane	GO:0008948//GO:0015081	oxaloacetate decarboxylase activity//sodium ion transmembrane transporter activity	GO:0016020	membrane	--	--	FALSE	-0.174415	1	FALSE	-0.273503	0.813895	FALSE	-0.558628	0.366298	FALSE	-0.887831	0.165986	FALSE	-1.21117	0.0245024
Cluster-11149.27063	33.75	42.85	35.62	70.97	45.72	3987	747074317	XP_011084145.1	2499	4.9e-279	probable UDP-N-acetylglucosamine--peptide N-acetylglucosaminyltransferase SEC [Sesamum indicum]	XM_011085843.2	XM_011085843	1109	0	PREDICTED: Sesamum indicum probable UDP-N-acetylglucosamine--peptide N-acetylglucosaminyltransferase SEC (LOC105166471), mRNA	K09667	OGT	protein O-GlcNAc transferase	http://www.genome.jp/dbget-bin/www_bget?ko:K09667	Q9M8Y0	2210	6e-247	Probable UDP-N-acetylglucosamine--peptide N-acetylglucosaminyltransferase SEC OS=Arabidopsis thaliana OX=3702 GN=SEC PE=1 SV=1	PF13174//PF14863//PF13181//PF06507//PF01184//PF13176//PF02666//PF00515//PF02903	Tetratricopeptide repeat//Alkyl sulfatase dimerisation//Tetratricopeptide repeat//Auxin response factor//GPR1/FUN34/yaaH family//Tetratricopeptide repeat//Phosphatidylserine decarboxylase//Tetratricopeptide repeat//Alpha amylase, N-terminal ig-like domain	GO:0008654//GO:0006544//GO:0046486//GO:0006355//GO:0006563//GO:0009725//GO:0005975//GO:0006566	phospholipid biosynthetic process//glycine metabolic process//glycerolipid metabolic process//regulation of transcription, DNA-templated//L-serine metabolic process//response to hormone//carbohydrate metabolic process//threonine metabolic process	GO:0004553//GO:0046983//GO:0003677//GO:0005515//GO:0004609	hydrolase activity, hydrolyzing O-glycosyl compounds//protein dimerization activity//DNA binding//protein binding//phosphatidylserine decarboxylase activity	GO:0016021//GO:0005634	integral component of membrane//nucleus	KOG4626	O-linked N-acetylglucosamine transferase OGT	FALSE	-0.528212	0.493263	FALSE	0.238521	0.850616	FALSE	-0.40047	0.525275	FALSE	-0.395708	0.672367	FALSE	-0.207194	0.830903
Cluster-11149.19393	17.1	29.85	26.67	53.7	34.29	1304	747106915	XP_011101755.1	1020	5e-108	UDP-glucuronic acid decarboxylase 6 [Sesamum indicum]	XM_011103453.2	XM_011103453	463	0	PREDICTED: Sesamum indicum UDP-glucuronic acid decarboxylase 6 (LOC105179814), transcript variant X4, mRNA	K08678	UXS1, uxs	UDP-glucuronate decarboxylase	http://www.genome.jp/dbget-bin/www_bget?ko:K08678	Q9ZV36	944	1.2e-100	UDP-glucuronic acid decarboxylase 6 OS=Arabidopsis thaliana OX=3702 GN=UXS6 PE=2 SV=1	PF01370//PF01073//PF03435//PF02254	NAD dependent epimerase/dehydratase family//3-beta hydroxysteroid dehydrogenase/isomerase family//Saccharopine dehydrogenase NADP binding domain//TrkA-N domain	GO:0008209//GO:0006694//GO:0008210//GO:0006813//GO:0008207//GO:0055114	androgen metabolic process//steroid biosynthetic process//estrogen metabolic process//potassium ion transport//C21-steroid hormone metabolic process//oxidation-reduction process	GO:0050662//GO:0003824//GO:0016616//GO:0003854//GO:0016491	obsolete coenzyme binding//catalytic activity//oxidoreductase activity, acting on the CH-OH group of donors, NAD or NADP as acceptor//3-beta-hydroxy-delta5-steroid dehydrogenase activity//oxidoreductase activity	--	--	KOG1429	dTDP-glucose 4-6-dehydratase/UDP-glucuronic acid decarboxylase	FALSE	-0.642087	0.365147	FALSE	0.249918	0.836084	FALSE	-0.502925	0.411388	FALSE	-0.978518	0.0918361	FALSE	-0.778576	0.156589
Cluster-11149.31812	14.48	19.84	13.06	28.91	16.83	2324	695035014	XP_009404975.1	1147	1.7e-122	PREDICTED: transmembrane 9 superfamily member 1 isoform X1 [Musa acuminata subsp. malaccensis]	XM_011094036.2	XM_011094036	560	0	PREDICTED: Sesamum indicum transmembrane 9 superfamily member 1 (LOC105172553), mRNA	K17087	TM9SF3	transmembrane 9 superfamily member 3	http://www.genome.jp/dbget-bin/www_bget?ko:K17087	Q940G0	1040	1.6e-111	Transmembrane 9 superfamily member 1 OS=Arabidopsis thaliana OX=3702 GN=TMN1 PE=1 SV=1	PF02990//PF04277	Endomembrane protein 70//Oxaloacetate decarboxylase, gamma chain	GO:0006814//GO:0006090//GO:0006525//GO:0006560//GO:0036376	sodium ion transport//pyruvate metabolic process//arginine metabolic process//proline metabolic process//sodium ion export across plasma membrane	GO:0008948//GO:0015081	oxaloacetate decarboxylase activity//sodium ion transmembrane transporter activity	GO:0016021//GO:0016020	integral component of membrane//membrane	KOG1277	Endosomal membrane proteins, EMP70	FALSE	-0.341841	0.762593	FALSE	0.384281	0.665984	FALSE	-0.0683263	1	FALSE	-0.321884	0.802924	FALSE	0.012392	1
Cluster-11149.23013	2.06	4.51	2.42	8.91	3.12	2124	747088483	XP_011091831.1	1927	5.5e-213	uridine 5'-monophosphate synthase [Sesamum indicum]	XM_011093529.2	XM_011093529	850	0	PREDICTED: Sesamum indicum uridine 5'-monophosphate synthase (LOC105172172), mRNA	K13421	UMPS	uridine monophosphate synthetase [EC:2.4.2.10 4.1.1.23]	http://www.genome.jp/dbget-bin/www_bget?ko:K13421	Q42942	1748	1.2e-193	Uridine 5'-monophosphate synthase (Fragment) OS=Nicotiana tabacum OX=4097 GN=PYR5-6 PE=2 SV=1	PF00156//PF00215	Phosphoribosyl transferase domain//Orotidine 5'-phosphate decarboxylase / HUMPS family	GO:0009116//GO:0006206//GO:0006207	nucleoside metabolic process//pyrimidine nucleobase metabolic process//'de novo' pyrimidine nucleobase biosynthetic process	GO:0004590	orotidine-5'-phosphate decarboxylase activity	--	--	KOG1377	Uridine 5'- monophosphate synthase/orotate phosphoribosyltransferase	FALSE	-0.779866	0.244997	FALSE	1.11639	0.0536114	FALSE	0.225817	0.830552	FALSE	-1.44033	0.00926985	FALSE	-0.373882	0.654226
Cluster-11149.10832	2.31	1.6	1.88	2.75	2.43	1188	747087472	XP_011091278.1	541	1.6e-52	uncharacterized protein LOC105171759 [Sesamum indicum]	XM_012987740.1	XM_012987740	181	3.31e-87	PREDICTED: Erythranthe guttatus uncharacterized LOC105963346 (LOC105963346), mRNA	-	-	-	http://www.genome.jp/dbget-bin/www_bget?ko:-	--	--	--	--	PF16957	Malonate decarboxylase, alpha subunit, transporter	--	--	GO:0016740	transferase activity	--	--	--	--	FALSE	-0.577775	0.573988	FALSE	-0.221349	0.978961	FALSE	-0.90927	0.20267	FALSE	0.420054	0.793528	FALSE	0.148776	0.971314
Cluster-11149.12152	0.07	0.08	0.23	1.4	0.3	826	1130857573	GAV62666.1	195	1.5e-12	Epimerase domain-containing protein [Cephalotus follicularis]	XM_011079117.2	XM_011079117	86	1.47e-34	PREDICTED: Sesamum indicum UDP-glucuronic acid decarboxylase 1 (LOC105161434), transcript variant X2, mRNA	K08678	UXS1, uxs	UDP-glucuronate decarboxylase	http://www.genome.jp/dbget-bin/www_bget?ko:K08678	Q8VZC0	191	1.6e-13	UDP-glucuronic acid decarboxylase 1 OS=Arabidopsis thaliana OX=3702 GN=UXS1 PE=1 SV=1	PF01370	NAD dependent epimerase/dehydratase family	--	--	GO:0003824//GO:0050662	catalytic activity//obsolete coenzyme binding	--	--	KOG1429	dTDP-glucose 4-6-dehydratase/UDP-glucuronic acid decarboxylase	DOWN	-3.83911	0.00496784	FALSE	1.79612	0.157046	FALSE	-2.12692	0.603248	FALSE	-3.4479	0.0296061	FALSE	-1.68433	0.618116
Cluster-11149.25453	14.9	19.85	13.5	24.06	17.77	2799	1276251566	PIN10217.1	1637	3.1e-179	Serine palmitoyltransferase [Handroanthus impetiginosus]	XM_012972988.1	XM_012972988	665	0	PREDICTED: Erythranthe guttatus long chain base biosynthesis protein 1 (LOC105949672), mRNA	K00654	SPT	serine palmitoyltransferase	http://www.genome.jp/dbget-bin/www_bget?ko:K00654	Q94IB8	1413	1.1e-154	Long chain base biosynthesis protein 1 OS=Arabidopsis thaliana OX=3702 GN=LCB1 PE=1 SV=1	PF01276//PF01053//PF00155	Orn/Lys/Arg decarboxylase, major domain//Cys/Met metabolism PLP-dependent enzyme//Aminotransferase class I and II	GO:0009058//GO:0019346	biosynthetic process//transsulfuration	GO:0030170//GO:0003824	pyridoxal phosphate binding//catalytic activity	--	--	KOG1358	Serine palmitoyltransferase	FALSE	-0.076723	1	FALSE	0.040492	1	FALSE	-0.147002	0.91099	FALSE	-0.015516	1	FALSE	-0.0250273	1
Cluster-11149.22693	29.52	43.25	31.99	63.93	42.52	2896	604347313	EYU45565.1	3579	0	hypothetical protein MIMGU_mgv1a001885mg [Erythranthe guttata]	XM_011092639.2	XM_011092639	1703	0	PREDICTED: Sesamum indicum cullin-1 (LOC105171499), transcript variant X2, mRNA	K03347	CUL1, CDC53	cullin 1	http://www.genome.jp/dbget-bin/www_bget?ko:K03347	Q5ZC88	3265	0	Cullin-1 OS=Oryza sativa subsp. japonica OX=39947 GN=CUL1 PE=1 SV=1	PF04277//PF00888	Oxaloacetate decarboxylase, gamma chain//Cullin family	GO:0006814//GO:0006090//GO:0006525//GO:0036376//GO:0006511//GO:0006560	sodium ion transport//pyruvate metabolic process//arginine metabolic process//sodium ion export across plasma membrane//ubiquitin-dependent protein catabolic process//proline metabolic process	GO:0008948//GO:0015081//GO:0031625	oxaloacetate decarboxylase activity//sodium ion transmembrane transporter activity//ubiquitin protein ligase binding	GO:0016020	membrane	KOG2166	Cullins	FALSE	-0.363447	0.730176	FALSE	0.192399	0.91134	FALSE	-0.281825	0.705108	FALSE	-0.43892	0.595714	FALSE	-0.296526	0.711573
Cluster-11149.26252	611.06	436.68	504.17	345.44	711.81	1122	848863676	XP_012832600.1	527	6.3e-51	PREDICTED: probable calcium-binding protein CML18 [Erythranthe guttata]	XM_011101171.2	XM_011101171	167	1.89e-79	PREDICTED: Sesamum indicum probable calcium-binding protein CML18 (LOC105177886), mRNA	K13448	CML	calcium-binding protein CML	http://www.genome.jp/dbget-bin/www_bget?ko:K13448	Q0DJV6	396	3.7e-37	Probable calcium-binding protein CML18 OS=Oryza sativa subsp. japonica OX=39947 GN=CML18 PE=2 SV=1	PF13499//PF04277//PF13202//PF10591//PF12763//PF13405//PF00404//PF00036	EF-hand domain pair//Oxaloacetate decarboxylase, gamma chain//EF hand//Secreted protein acidic and rich in cysteine Ca binding region//Cytoskeletal-regulatory complex EF hand//EF-hand domain//Dockerin type I domain//EF hand	GO:0006560//GO:0036376//GO:0006525//GO:0005975//GO:0000272//GO:0006090//GO:0006814	proline metabolic process//sodium ion export across plasma membrane//arginine metabolic process//carbohydrate metabolic process//polysaccharide catabolic process//pyruvate metabolic process//sodium ion transport	GO:0004553//GO:0015081//GO:0005515//GO:0008948//GO:0005509	hydrolase activity, hydrolyzing O-glycosyl compounds//sodium ion transmembrane transporter activity//protein binding//oxaloacetate decarboxylase activity//calcium ion binding	GO:0016020	membrane	--	--	FALSE	0.544351	0.468206	DOWN	-1.44058	0.00453894	FALSE	-1.00701	0.0440184	UP	1.4938	0.00304434	FALSE	0.00321473	1
Cluster-11149.5830	0.24	0.67	0.79	1.35	1.14	969	--	--	--	--	--	--	--	--	--	--	--	--	--	--	--	--	--	--	PF04277	Oxaloacetate decarboxylase, gamma chain	GO:0006090//GO:0006814//GO:0006525//GO:0036376//GO:0006560	pyruvate metabolic process//sodium ion transport//arginine metabolic process//sodium ion export across plasma membrane//proline metabolic process	GO:0015081//GO:0008948	sodium ion transmembrane transporter activity//oxaloacetate decarboxylase activity	GO:0016020	membrane	--	--	FALSE	-0.793928	0.586624	FALSE	-0.148137	1	FALSE	-1.05077	0.29498	FALSE	-1.81965	0.159846	FALSE	-2.01213	0.0498677
Cluster-11149.20917	7.69	17	15.26	35.5	22.85	3642	1276244129	PIN04576.1	1912	5.2e-211	dTDP-glucose 4-6-dehydratase/UDP-glucuronic acid decarboxylase [Handroanthus impetiginosus]	XM_011084169.2	XM_011084169	475	0	PREDICTED: Sesamum indicum UDP-glucuronic acid decarboxylase 2 (LOC105165224), mRNA	K08678	UXS1, uxs	UDP-glucuronate decarboxylase	http://www.genome.jp/dbget-bin/www_bget?ko:K08678	Q9LZI2	1690	1.1e-186	UDP-glucuronic acid decarboxylase 2 OS=Arabidopsis thaliana OX=3702 GN=UXS2 PE=1 SV=1	PF01073//PF01370	3-beta hydroxysteroid dehydrogenase/isomerase family//NAD dependent epimerase/dehydratase family	GO:0008207//GO:0055114//GO:0006694//GO:0008210//GO:0008209	C21-steroid hormone metabolic process//oxidation-reduction process//steroid biosynthetic process//estrogen metabolic process//androgen metabolic process	GO:0003854//GO:0016616//GO:0003824//GO:0050662	3-beta-hydroxy-delta5-steroid dehydrogenase activity//oxidoreductase activity, acting on the CH-OH group of donors, NAD or NADP as acceptor//catalytic activity//obsolete coenzyme binding	--	--	KOG1429	dTDP-glucose 4-6-dehydratase/UDP-glucuronic acid decarboxylase	FALSE	-0.862287	0.156819	FALSE	0.23959	0.850616	FALSE	-0.733464	0.171197	DOWN	-1.53032	0.0026128	FALSE	-1.34071	0.00658507
Cluster-11149.35466	3.74	3.79	3.12	6.78	4.75	3537	848930926	XP_012828617.1	606	1.4e-59	PREDICTED: uncharacterized protein LOC105949855 [Erythranthe guttata]	XM_012973163.1	XM_012973163	188	1.29e-90	PREDICTED: Erythranthe guttatus uncharacterized LOC105949855 (LOC105949855), mRNA	-	-	-	http://www.genome.jp/dbget-bin/www_bget?ko:-	--	--	--	--	PF04277	Oxaloacetate decarboxylase, gamma chain	GO:0006560//GO:0036376//GO:0006525//GO:0006090//GO:0006814	proline metabolic process//sodium ion export across plasma membrane//arginine metabolic process//pyruvate metabolic process//sodium ion transport	GO:0015081//GO:0008948	sodium ion transmembrane transporter activity//oxaloacetate decarboxylase activity	GO:0016020	membrane	--	--	FALSE	-0.638349	0.380656	FALSE	0.118616	1	FALSE	-0.630443	0.275	FALSE	-0.182907	0.975794	FALSE	-0.114279	0.985
Cluster-17507.0	0.84	0.75	0.85	1.87	1.35	2121	747070690	XP_011082177.1	1674	1.2e-183	protein decapping 5 isoform X1 [Sesamum indicum]	XM_011083875.2	XM_011083875	805	0	PREDICTED: Sesamum indicum protein decapping 5 (LOC105165003), transcript variant X1, mRNA	-	-	-	http://www.genome.jp/dbget-bin/www_bget?ko:-	Q9FH77	562	4e-56	Decapping 5-like protein OS=Arabidopsis thaliana OX=3702 GN=DCP5-L PE=2 SV=1	PF02329	Histidine carboxylase PI chain	GO:0006547	histidine metabolic process	GO:0004398	histidine decarboxylase activity	--	--	KOG1073	Uncharacterized mRNA-associated protein RAP55	FALSE	-1.10839	0.132517	FALSE	0.0749698	1	FALSE	-1.14344	0.0897997	FALSE	-0.485231	0.690722	FALSE	-0.459972	0.619234
Cluster-11149.34599	6.49	6.74	6.68	24.28	11.07	1452	1276240278	PIN01842.1	783	1.7e-80	Transthyretin [Handroanthus impetiginosus]	XM_011095150.2	XM_011095150	336	2.79e-173	PREDICTED: Sesamum indicum uric acid degradation bifunctional protein TTL (LOC105173421), transcript variant X2, mRNA	K13484	TTHL	5-hydroxyisourate hydrolase / 2-oxo-4-hydroxy-4-carboxy-5-ureidoimidazoline decarboxylase [EC:3.5.2.17 4.1.1.97]	http://www.genome.jp/dbget-bin/www_bget?ko:K13484	Q9LVM5	432	3.2e-41	Uric acid degradation bifunctional protein TTL OS=Arabidopsis thaliana OX=3702 GN=TTL PE=1 SV=1	--	--	--	--	--	--	--	--	--	--	DOWN	-1.64446	0.00166277	FALSE	0.736231	0.252584	FALSE	-1.01888	0.0560755	FALSE	-1.22926	0.0262138	FALSE	-0.542988	0.400135
Cluster-11149.12995	4.4	2.62	1.75	3.36	2.93	1207	1276260058	PIN17141.1	764	2.2e-78	Oxaloacetate decarboxylase [Handroanthus impetiginosus]	XM_011077869.2	XM_011077869	233	4.17e-116	PREDICTED: Sesamum indicum putative 4-hydroxy-4-methyl-2-oxoglutarate aldolase 2 (LOC105160481), mRNA	-	-	-	http://www.genome.jp/dbget-bin/www_bget?ko:-	Q9FFE0	694	1.1e-71	Putative 4-hydroxy-4-methyl-2-oxoglutarate aldolase 2 OS=Arabidopsis thaliana OX=3702 GN=At5g16450 PE=1 SV=1	--	--	--	--	--	--	--	--	--	--	FALSE	-0.150842	1	FALSE	-0.198739	0.991903	FALSE	-0.460056	0.593038	FALSE	1.0592	0.103131	FALSE	0.810341	0.198866
Cluster-11149.30390	22.86	23.54	16.97	43.17	29.35	3014	747043352	XP_011083372.1	1321	1.5e-142	long chain base biosynthesis protein 2a [Sesamum indicum]	XM_011085070.2	XM_011085070	595	0	PREDICTED: Sesamum indicum long chain base biosynthesis protein 2a (LOC105165910), mRNA	K00654	SPT	serine palmitoyltransferase	http://www.genome.jp/dbget-bin/www_bget?ko:K00654	Q9LSZ9	1238	2.3e-134	Long chain base biosynthesis protein 2a OS=Arabidopsis thaliana OX=3702 GN=LCB2a PE=1 SV=1	PF00155//PF01276	Aminotransferase class I and II//Orn/Lys/Arg decarboxylase, major domain	GO:0009058	biosynthetic process	GO:0030170//GO:0003824	pyridoxal phosphate binding//catalytic activity	--	--	KOG1357	Serine palmitoyltransferase	FALSE	-0.674306	0.317128	FALSE	0.160354	0.96542	FALSE	-0.624722	0.2719	FALSE	-0.241249	0.861551	FALSE	-0.1309	0.946644
Cluster-11149.25663	104.8	164.16	149.9	284.56	260.83	3464	1276270394	PIN25918.1	1464	4.4e-159	S-adenosylmethionine decarboxylase [Handroanthus impetiginosus]	XM_020691518.1	XM_020691518	508	0	PREDICTED: Sesamum indicum S-adenosylmethionine decarboxylase proenzyme (LOC105156447), transcript variant X2, mRNA	K01611	speD, AMD1	S-adenosylmethionine decarboxylase	http://www.genome.jp/dbget-bin/www_bget?ko:K01611	Q42679	1277	8e-139	S-adenosylmethionine decarboxylase proenzyme OS=Catharanthus roseus OX=4058 GN=SAMDC PE=1 SV=1	PF01536	Adenosylmethionine decarboxylase	GO:0006560//GO:0006525//GO:0006597//GO:0008295	proline metabolic process//arginine metabolic process//spermine biosynthetic process//spermidine biosynthetic process	GO:0004014	adenosylmethionine decarboxylase activity	--	--	KOG0788	S-adenosylmethionine decarboxylase	FALSE	-0.593641	0.394512	FALSE	-0.270311	0.797047	FALSE	-0.974734	0.0531502	FALSE	-0.764976	0.213228	FALSE	-1.08529	0.0297737
Cluster-11149.2377	0	10.49	8.9	8.17	15.55	494	1279006838	XP_022863847.1	320	2.8e-27	UDP-glucuronic acid decarboxylase 6 [Olea europaea var. sylvestris]	XM_011095509.2	XM_011095509	138	1.06e-63	PREDICTED: Sesamum indicum UDP-glucuronic acid decarboxylase 6-like (LOC105173667), mRNA	K08678	UXS1, uxs	UDP-glucuronate decarboxylase	http://www.genome.jp/dbget-bin/www_bget?ko:K08678	Q9ZV36	281	3.5e-24	UDP-glucuronic acid decarboxylase 6 OS=Arabidopsis thaliana OX=3702 GN=UXS6 PE=2 SV=1	--	--	--	--	--	--	--	--	KOG1429	dTDP-glucose 4-6-dehydratase/UDP-glucuronic acid decarboxylase	FALSE	0.590558	0.579566	FALSE	-1.32685	0.0383504	FALSE	-0.846827	0.177919	DOWN	-8.25928	5.63e-06	DOWN	-9.36294	4.39e-12
Cluster-11149.31793	20.28	16.51	14.72	30.59	26.15	4083	747059037	XP_011075879.1	2161	7.8e-240	uncharacterized protein LOC105160266 isoform X1 [Sesamum indicum]	XM_012988115.1	XM_012988115	263	3.03e-132	PREDICTED: Erythranthe guttatus uncharacterized LOC105963677 (LOC105963677), mRNA	-	-	-	http://www.genome.jp/dbget-bin/www_bget?ko:-	--	--	--	--	PF01536	Adenosylmethionine decarboxylase	GO:0006597//GO:0008295//GO:0006560//GO:0006525	spermine biosynthetic process//spermidine biosynthetic process//proline metabolic process//arginine metabolic process	GO:0004014	adenosylmethionine decarboxylase activity	--	--	--	--	FALSE	-0.690202	0.296786	FALSE	-0.169627	0.948959	FALSE	-0.970598	0.0564482	FALSE	0.0833478	1	FALSE	-0.136283	0.939472
Cluster-11149.13223	7.62	8.5	8.48	14.07	15.33	1519	848929675	XP_012828204.1	1271	4.6e-137	PREDICTED: hydroxymethylglutaryl-CoA lyase, mitochondrial-like [Erythranthe guttata]	XM_020693468.1	XM_020693468	483	0	PREDICTED: Sesamum indicum hydroxymethylglutaryl-CoA lyase, mitochondrial (LOC105159928), transcript variant X2, mRNA	K01640	E4.1.3.4, HMGCL, hmgL	hydroxymethylglutaryl-CoA lyase	http://www.genome.jp/dbget-bin/www_bget?ko:K01640	O81027	1112	4.8e-120	Hydroxymethylglutaryl-CoA lyase, mitochondrial OS=Arabidopsis thaliana OX=3702 GN=HMGCL PE=1 SV=2	PF00682//PF04277	HMGL-like//Oxaloacetate decarboxylase, gamma chain	GO:0006090//GO:0006814//GO:0036376//GO:0006560//GO:0006525	pyruvate metabolic process//sodium ion transport//sodium ion export across plasma membrane//proline metabolic process//arginine metabolic process	GO:0015081//GO:0008948//GO:0003824	sodium ion transmembrane transporter activity//oxaloacetate decarboxylase activity//catalytic activity	GO:0016020	membrane	KOG2368	Hydroxymethylglutaryl-CoA lyase	FALSE	-0.523762	0.540266	FALSE	-0.520165	0.496018	FALSE	-1.15462	0.0246112	FALSE	-0.212256	0.940788	FALSE	-0.782353	0.166109
Cluster-11149.13030	4.35	6.32	5.82	16.09	11.04	3266	747075578	XP_011084830.1	833	6.1e-86	uncharacterized membrane protein At1g06890 [Sesamum indicum]	XM_011086528.2	XM_011086528	377	0	PREDICTED: Sesamum indicum uncharacterized membrane protein At1g06890 (LOC105166986), mRNA	K15285	SLC35E3	solute carrier family 35, member E3	http://www.genome.jp/dbget-bin/www_bget?ko:K15285	Q8GUJ1	661	2e-67	UDP-xylose transporter 2 OS=Arabidopsis thaliana OX=3702 GN=UXT2 PE=1 SV=1	PF00892//PF04277//PF08449	EamA-like transporter family//Oxaloacetate decarboxylase, gamma chain//UAA transporter family	GO:0055085//GO:0006525//GO:0006560//GO:0036376//GO:0006814//GO:0006090	transmembrane transport//arginine metabolic process//proline metabolic process//sodium ion export across plasma membrane//sodium ion transport//pyruvate metabolic process	GO:0008948//GO:0015081	oxaloacetate decarboxylase activity//sodium ion transmembrane transporter activity	GO:0016021//GO:0016020	integral component of membrane//membrane	--	--	FALSE	-1.14761	0.0402547	FALSE	0.14723	0.987575	FALSE	-1.11111	0.0282502	FALSE	-1.20964	0.0263975	FALSE	-1.11236	0.0303263
Cluster-11149.19645	2.98	5.03	2.79	6.62	5.38	3350	747085049	XP_011089962.1	888	2.6e-92	DNA ligase 1 [Sesamum indicum]	XM_012983136.1	XM_012983136	303	1.44e-154	PREDICTED: Erythranthe guttatus DNA ligase 1-like (LOC105959103), mRNA	-	-	-	http://www.genome.jp/dbget-bin/www_bget?ko:-	Q42572	662	1.6e-67	DNA ligase 1 OS=Arabidopsis thaliana OX=3702 GN=LIG1 PE=2 SV=2	PF01068//PF04675//PF04277	ATP dependent DNA ligase domain//DNA ligase N terminus//Oxaloacetate decarboxylase, gamma chain	GO:0006525//GO:0036376//GO:0006560//GO:0006310//GO:0006090//GO:0006260//GO:0006281//GO:0006814	arginine metabolic process//sodium ion export across plasma membrane//proline metabolic process//DNA recombination//pyruvate metabolic process//DNA replication//DNA repair//sodium ion transport	GO:0003677//GO:0003910//GO:0015081//GO:0005524//GO:0008948	DNA binding//DNA ligase (ATP) activity//sodium ion transmembrane transporter activity//ATP binding//oxaloacetate decarboxylase activity	GO:0016020	membrane	KOG0967	ATP-dependent DNA ligase I	FALSE	-0.196296	0.967304	FALSE	-0.0954927	1	FALSE	-0.402523	0.544624	FALSE	-0.475011	0.566391	FALSE	-0.620449	0.296466
Cluster-11149.27823	9.8	11.16	8.02	12.58	15.76	4286	1276249990	PIN08995.1	3104	0	Phospholipase D1 [Handroanthus impetiginosus]	XM_011073740.2	XM_011073740	1212	0	PREDICTED: Sesamum indicum phospholipase D beta 1 (LOC105157338), mRNA	K01115	PLD1_2	phospholipase D1/2	http://www.genome.jp/dbget-bin/www_bget?ko:K01115	P93733	2460	6.6e-276	Phospholipase D beta 1 OS=Arabidopsis thaliana OX=3702 GN=PLDBETA1 PE=1 SV=4	PF00614//PF02627	Phospholipase D Active site motif//Carboxymuconolactone decarboxylase family	GO:0055114	oxidation-reduction process	GO:0051920//GO:0003824	peroxiredoxin activity//catalytic activity	--	--	--	--	FALSE	0.0264833	1	FALSE	-0.720747	0.254809	FALSE	-0.80503	0.12912	FALSE	0.31514	0.806498	FALSE	-0.455599	0.461357
Cluster-11149.35224	17.05	16.5	12.44	18.53	24.49	1680	1276258234	PIN15634.1	1576	2.2e-172	Serine/threonine specific protein phosphatase PP1, catalytic subunit [Handroanthus impetiginosus]	XM_011089141.2	XM_011089141	702	0	PREDICTED: Sesamum indicum serine/threonine-protein phosphatase PP1-like (LOC105168929), transcript variant X1, mRNA	K06269	PPP1C	serine/threonine-protein phosphatase PP1 catalytic subunit	http://www.genome.jp/dbget-bin/www_bget?ko:K06269	Q9M9W3	1485	3e-163	Serine/threonine-protein phosphatase PP1 isozyme 9 OS=Arabidopsis thaliana OX=3702 GN=TOPP9 PE=1 SV=1	PF00149//PF04277	Calcineurin-like phosphoesterase//Oxaloacetate decarboxylase, gamma chain	GO:0006090//GO:0006814//GO:0006560//GO:0036376//GO:0006525	pyruvate metabolic process//sodium ion transport//proline metabolic process//sodium ion export across plasma membrane//arginine metabolic process	GO:0015081//GO:0016787//GO:0008948	sodium ion transmembrane transporter activity//hydrolase activity//oxaloacetate decarboxylase activity	GO:0016020	membrane	KOG0374	Serine/threonine specific protein phosphatase PP1, catalytic subunit	FALSE	0.0353439	1	FALSE	-0.798737	0.191052	FALSE	-0.874142	0.101018	FALSE	0.553424	0.455677	FALSE	-0.295295	0.718234
Cluster-11149.30333	0.34	0.44	0.36	1.37	0.74	3446	747080403	XP_011087452.1	3681	0	kinesin-like protein KIN-14I [Sesamum indicum]	XM_011089150.2	XM_011089150	1462	0	PREDICTED: Sesamum indicum kinesin-like protein KIN-14I (LOC105168936), mRNA	K10406	KIFC2_3	kinesin family member C2/C3	http://www.genome.jp/dbget-bin/www_bget?ko:K10406	F4IL57	2584	2.2e-290	Kinesin-like protein KIN-14I OS=Arabidopsis thaliana OX=3702 GN=KIN14I PE=2 SV=1	PF07926//PF00225//PF16796//PF11803//PF06156//PF16716//PF02183//PF00307	TPR/MLP1/MLP2-like protein//Kinesin motor domain//Microtubule binding//UDP-glucuronate decarboxylase N-terminal//Initiation control protein YabA//Bone marrow stromal antigen 2//Homeobox associated leucine zipper//Calponin homology (CH) domain	GO:0006260//GO:0006355//GO:0006606//GO:0007018//GO:0007017//GO:0009117//GO:0005982//GO:0005985//GO:0051607	DNA replication//regulation of transcription, DNA-templated//protein import into nucleus//microtubule-based movement//microtubule-based process//nucleotide metabolic process//starch metabolic process//sucrose metabolic process//defense response to virus	GO:0043565//GO:0005515//GO:0048040//GO:0005524//GO:0003777//GO:0008017	sequence-specific DNA binding//protein binding//UDP-glucuronate decarboxylase activity//ATP binding//microtubule motor activity//microtubule binding	GO:0005874//GO:0045298	microtubule//tubulin complex	--	--	FALSE	-1.43331	0.0292552	FALSE	0.493621	0.622493	FALSE	-1.0497	0.127372	FALSE	-1.31753	0.0606833	FALSE	-0.873368	0.255865
Cluster-11149.10146	0.76	1.42	1.36	3.42	2.92	1868	563768002	AHB63230.1	2262	6.9e-252	glutamate decarboxylase 1 [Scutellaria baicalensis]	XM_011088673.2	XM_011088673	984	0	PREDICTED: Sesamum indicum glutamate decarboxylase (LOC105168543), mRNA	K01580	E4.1.1.15, gadB, gadA, GAD	glutamate decarboxylase	http://www.genome.jp/dbget-bin/www_bget?ko:K01580	P54767	2106	3.2e-235	Glutamate decarboxylase OS=Solanum lycopersicum OX=4081 PE=2 SV=1	PF00282	Pyridoxal-dependent decarboxylase conserved domain	GO:0019752	carboxylic acid metabolic process	GO:0016831//GO:0030170	carboxy-lyase activity//pyridoxal phosphate binding	--	--	KOG1383	Glutamate decarboxylase/sphingosine phosphate lyase	FALSE	-1.06743	0.112724	FALSE	-0.172407	0.989243	FALSE	-1.35014	0.0193563	FALSE	-1.49308	0.0227838	DOWN	-1.71474	0.00359579
Cluster-11149.34471	3.55	4.01	2.54	6.82	5.83	3985	747088120	XP_011091632.1	1858	1e-204	3beta-hydroxysteroid-dehydrogenase/decarboxylase isoform X1 [Sesamum indicum]	XM_011093330.2	XM_011093330	693	0	PREDICTED: Sesamum indicum 3beta-hydroxysteroid-dehydrogenase/decarboxylase (LOC105172010), transcript variant X1, mRNA	K07748	E1.1.1.170, NSDHL, ERG26	sterol-4alpha-carboxylate 3-dehydrogenase (decarboxylating)	http://www.genome.jp/dbget-bin/www_bget?ko:K07748	A9X4U2	1108	3.6e-119	3beta-hydroxysteroid-dehydrogenase/decarboxylase isoform 3 OS=Arabidopsis thaliana OX=3702 GN=3BETAHSD/D3 PE=2 SV=2	PF01073//PF03435//PF01370	3-beta hydroxysteroid dehydrogenase/isomerase family//Saccharopine dehydrogenase NADP binding domain//NAD dependent epimerase/dehydratase family	GO:0008210//GO:0006694//GO:0008209//GO:0008207//GO:0055114	estrogen metabolic process//steroid biosynthetic process//androgen metabolic process//C21-steroid hormone metabolic process//oxidation-reduction process	GO:0050662//GO:0003854//GO:0016491//GO:0016616//GO:0003824	obsolete coenzyme binding//3-beta-hydroxy-delta5-steroid dehydrogenase activity//oxidoreductase activity//oxidoreductase activity, acting on the CH-OH group of donors, NAD or NADP as acceptor//catalytic activity	--	--	KOG1430	C-3 sterol dehydrogenase/3-beta-hydroxysteroid dehydrogenase and related dehydrogenases	FALSE	-0.567334	0.461317	FALSE	-0.169661	0.958532	FALSE	-0.847716	0.113122	FALSE	-0.266811	0.840104	FALSE	-0.486441	0.44892
Cluster-11149.30667	9.32	7.27	5.51	14.5	13.1	2030	1276252862	PIN11220.1	1955	3e-216	Malonyl-CoA decarboxylase [Handroanthus impetiginosus]	XM_011087902.2	XM_011087902	1029	0	PREDICTED: Sesamum indicum malonyl-CoA decarboxylase, mitochondrial (LOC105168000), transcript variant X2, mRNA	K01578	MLYCD	malonyl-CoA decarboxylase	http://www.genome.jp/dbget-bin/www_bget?ko:K01578	P12617	720	1.8e-74	Malonyl-CoA decarboxylase, mitochondrial OS=Anser anser anser OX=8844 GN=MLYCD PE=1 SV=2	PF05292	Malonyl-CoA decarboxylase C-terminal domain	GO:0006633//GO:0019482	fatty acid biosynthetic process//beta-alanine metabolic process	GO:0050080	malonyl-CoA decarboxylase activity	--	--	KOG3018	Malonyl-CoA decarboxylase	FALSE	-0.79357	0.221535	FALSE	-0.249356	0.842096	FALSE	-1.15363	0.0233754	FALSE	0.0366347	1	FALSE	-0.262703	0.750053
Cluster-17638.0	0.39	0.39	0.57	0.19	1.36	472	1579176289	QBF58591.1	537	1.8e-52	Ycf1 (chloroplast) [Rehmannia glutinosa]	MG977438.1	MG977438	472	0	Rehmannia glutinosa cultivar Jiwhang 1 chloroplast, complete genome	-	-	-	http://www.genome.jp/dbget-bin/www_bget?ko:-	Q2MI42	328	1.2e-29	Protein TIC 214 OS=Solanum lycopersicum OX=4081 GN=TIC214 PE=3 SV=1	PF05758//PF01958//PF04277	Ycf1//Domain of unknown function DUF108//Oxaloacetate decarboxylase, gamma chain	GO:0006090//GO:0006814//GO:0009435//GO:0006525//GO:0036376//GO:0006560	pyruvate metabolic process//sodium ion transport//NAD biosynthetic process//arginine metabolic process//sodium ion export across plasma membrane//proline metabolic process	GO:0015081//GO:0008948//GO:0033735	sodium ion transmembrane transporter activity//oxaloacetate decarboxylase activity//aspartate dehydrogenase activity	GO:0016021//GO:0016020	integral component of membrane//membrane	--	--	FALSE	1.15914	1	FALSE	-3.06068	0.188068	FALSE	-2.00663	0.278621	FALSE	1.54048	1	FALSE	-1.54861	0.400135
Cluster-11149.23454	6.36	7.24	4.07	10.95	10.31	1649	1276258600	PIN15947.1	466	1.1e-43	Gamma-glutamyl hydrolase [Handroanthus impetiginosus]	XM_019369325.1	XM_019369325	42	8.62e-10	PREDICTED: Nicotiana attenuata gamma-glutamyl hydrolase 1-like (LOC109206503), mRNA	K01307	GGH	gamma-glutamyl hydrolase	http://www.genome.jp/dbget-bin/www_bget?ko:K01307	O65355	306	1.5e-26	Gamma-glutamyl hydrolase 2 OS=Arabidopsis thaliana OX=3702 GN=GGH2 PE=1 SV=2	PF07722//PF04277	Peptidase C26//Oxaloacetate decarboxylase, gamma chain	GO:0036376//GO:0006560//GO:0006525//GO:0006814//GO:0006090	sodium ion export across plasma membrane//proline metabolic process//arginine metabolic process//sodium ion transport//pyruvate metabolic process	GO:0008948//GO:0015081//GO:0016787	oxaloacetate decarboxylase activity//sodium ion transmembrane transporter activity//hydrolase activity	GO:0016020	membrane	--	--	FALSE	-0.394255	0.710504	FALSE	-0.308902	0.791632	FALSE	-0.813852	0.141568	FALSE	-0.110247	1	FALSE	-0.469095	0.47642
Cluster-11149.14291	0	0.19	0.75	0.57	1.92	475	--	--	--	--	--	--	--	--	--	--	--	--	--	--	--	--	--	--	PF03839//PF01440//PF04277//PF08496//PF04647	Translocation protein Sec62//Geminivirus AL2 protein//Oxaloacetate decarboxylase, gamma chain//Peptidase family S49 N-terminal//Accessory gene regulator B	GO:0006560//GO:0006814//GO:0015031//GO:0036376//GO:0006525//GO:0009405//GO:0009372//GO:0006090	proline metabolic process//sodium ion transport//protein transport//sodium ion export across plasma membrane//arginine metabolic process//pathogenesis//quorum sensing//pyruvate metabolic process	GO:0004252//GO:0005198//GO:0008233//GO:0008948//GO:0015081	serine-type endopeptidase activity//structural molecule activity//peptidase activity//oxaloacetate decarboxylase activity//sodium ion transmembrane transporter activity	GO:0016020//GO:0030176//GO:0019028//GO:0016021//GO:0005886	membrane//integral component of endoplasmic reticulum membrane//viral capsid//integral component of membrane//plasma membrane	--	--	FALSE	-1.22997	0.959805	FALSE	-2.10963	0.144338	FALSE	-3.42481	0.039355	FALSE	-4.35711	0.806498	FALSE	-6.24242	0.0245024
Cluster-9895.0	0.42	0.58	0.22	0.49	0.57	858	--	--	--	--	--	--	--	--	--	--	--	--	--	--	--	--	--	--	PF05292	Malonyl-CoA decarboxylase C-terminal domain	GO:0019482//GO:0006633	beta-alanine metabolic process//fatty acid biosynthetic process	GO:0050080	malonyl-CoA decarboxylase activity	--	--	--	--	FALSE	0.449055	0.973453	FALSE	-0.607186	0.921381	FALSE	-0.267357	0.999976	FALSE	0.448443	0.931203	FALSE	-0.206687	1
Cluster-11149.24524	8.94	18.73	34.13	45.63	89.03	2128	1173790034	XP_011075886.2	1079	1.2e-114	caffeic acid 3-O-methyltransferase 2 [Sesamum indicum]	HM990153.1	HM990153	326	1.49e-167	Ocimum tenuiflorum caffeic acid O-methyltransferase mRNA, complete cds	K13066	E2.1.1.68, COMT	caffeic acid 3-O-methyltransferase	http://www.genome.jp/dbget-bin/www_bget?ko:K13066	Q8W013	1068	8.5e-115	Caffeic acid 3-O-methyltransferase OS=Catharanthus roseus OX=4058 GN=COMT1 PE=2 SV=1	PF00891//PF04277//PF08100	O-methyltransferase domain//Oxaloacetate decarboxylase, gamma chain//Dimerisation domain	GO:0006814//GO:0006090//GO:0036376//GO:0006560//GO:0006525	sodium ion transport//pyruvate metabolic process//sodium ion export across plasma membrane//proline metabolic process//arginine metabolic process	GO:0008948//GO:0015081//GO:0046983//GO:0008171	oxaloacetate decarboxylase activity//sodium ion transmembrane transporter activity//protein dimerization activity//O-methyltransferase activity	GO:0016020	membrane	--	--	FALSE	-1.08306	0.0541501	FALSE	-1.36079	0.00833306	DOWN	-2.5546	5.58e-08	DOWN	-1.67605	0.000876451	DOWN	-3.08678	1.07e-10
Cluster-11149.14863	6.88	5.1	3.44	7.89	9.02	4179	1276246521	PIN06331.1	1544	2.8e-168	Glutamate decarboxylase/sphingosine phosphate lyase [Handroanthus impetiginosus]	XM_011088527.2	XM_011088527	709	0	PREDICTED: Sesamum indicum sphingosine-1-phosphate lyase (LOC105168441), transcript variant X1, mRNA	K01634	SGPL1, DPL1	sphinganine-1-phosphate aldolase	http://www.genome.jp/dbget-bin/www_bget?ko:K01634	Q9C509	1249	1.7e-135	Sphingosine-1-phosphate lyase OS=Arabidopsis thaliana OX=3702 GN=DPL1 PE=1 SV=1	PF04117//PF16499//PF00282	Mpv17 / PMP22 family//Alpha galactosidase A//Pyridoxal-dependent decarboxylase conserved domain	GO:0019752//GO:0005975	carboxylic acid metabolic process//carbohydrate metabolic process	GO:0016831//GO:0004553//GO:0030170	carboxy-lyase activity//hydrolase activity, hydrolyzing O-glycosyl compounds//pyridoxal phosphate binding	GO:0016021	integral component of membrane	KOG1383	Glutamate decarboxylase/sphingosine phosphate lyase	FALSE	-0.429778	0.636611	FALSE	-0.589301	0.389141	FALSE	-1.12981	0.0249864	FALSE	0.479877	0.555907	FALSE	-0.159415	0.902688
Cluster-11149.9925	0.86	0.52	1.11	0.29	3.42	844	--	--	--	--	--	--	--	--	--	--	--	--	--	--	--	--	--	--	PF04277	Oxaloacetate decarboxylase, gamma chain	GO:0006560//GO:0036376//GO:0006525//GO:0006090//GO:0006814	proline metabolic process//sodium ion export across plasma membrane//arginine metabolic process//pyruvate metabolic process//sodium ion transport	GO:0015081//GO:0008948	sodium ion transmembrane transporter activity//oxaloacetate decarboxylase activity	GO:0016020	membrane	--	--	FALSE	1.04611	0.797715	DOWN	-3.93174	2.6e-06	DOWN	-2.99432	6.03e-05	FALSE	2.22129	0.093371	FALSE	-1.7552	0.0176184
Cluster-11149.25708	112.25	44.2	99.28	202.77	312.53	2995	747046811	XP_011101363.1	1588	1.6e-173	uncharacterized protein LOC105179443 [Sesamum indicum]	XM_011103061.2	XM_011103061	645	0	PREDICTED: Sesamum indicum uncharacterized LOC105179443 (LOC105179443), mRNA	-	-	-	http://www.genome.jp/dbget-bin/www_bget?ko:-	Q9CAK4	617	2.4e-62	Protein ROH1 OS=Arabidopsis thaliana OX=3702 GN=ROH1 PE=1 SV=1	PF04277//PF15168	Oxaloacetate decarboxylase, gamma chain//Triple QxxK/R motif-containing protein family	GO:0036376//GO:0006560//GO:0006525//GO:0006814//GO:0006090	sodium ion export across plasma membrane//proline metabolic process//arginine metabolic process//sodium ion transport//pyruvate metabolic process	GO:0008948//GO:0015081	oxaloacetate decarboxylase activity//sodium ion transmembrane transporter activity	GO:0005789//GO:0016020	endoplasmic reticulum membrane//membrane	--	--	DOWN	-1.9975	4.07e-05	FALSE	-1.02013	0.0616839	DOWN	-3.12841	3.34e-11	FALSE	-0.177293	0.971617	FALSE	-1.24743	0.0110667
Cluster-11149.37857	2.36	2.02	2.8	4.59	9.33	397	--	--	--	--	--	XR_848078.2	XR_848078	35	1.51e-06	PREDICTED: Sesamum indicum protein DEHYDRATION-INDUCED 19 homolog 4 (LOC105165205), transcript variant X2, misc_RNA	--	--	--	--	--	--	--	--	PF04277	Oxaloacetate decarboxylase, gamma chain	GO:0006525//GO:0006560//GO:0036376//GO:0006814//GO:0006090	arginine metabolic process//proline metabolic process//sodium ion export across plasma membrane//sodium ion transport//pyruvate metabolic process	GO:0008948//GO:0015081	oxaloacetate decarboxylase activity//sodium ion transmembrane transporter activity	GO:0016020	membrane	--	--	FALSE	-0.917757	0.621987	FALSE	-1.41659	0.0779971	DOWN	-2.44136	0.00238337	FALSE	-0.317297	1	FALSE	-1.7806	0.0405755
Cluster-11149.9386	0.42	1.5	0.58	1.02	1.94	1160	1173777298	XP_011099396.2	523	1.9e-50	uncharacterized protein LOC105177834 [Sesamum indicum]	XM_011075380.2	XM_011075380	166	7.04e-79	PREDICTED: Sesamum indicum uncharacterized LOC105158586 (LOC105158586), mRNA	-	-	-	http://www.genome.jp/dbget-bin/www_bget?ko:-	--	--	--	--	PF11803	UDP-glucuronate decarboxylase N-terminal	GO:0005982//GO:0005985//GO:0009117	starch metabolic process//sucrose metabolic process//nucleotide metabolic process	GO:0048040	UDP-glucuronate decarboxylase activity	--	--	--	--	FALSE	0.755035	0.524743	FALSE	-1.31716	0.101264	FALSE	-0.672509	0.415167	FALSE	-0.604955	0.806498	FALSE	-1.9692	0.0141431
Cluster-11149.37519	3.3	4.85	2.43	14.38	8.99	1738	848922171	XP_012857645.1	1522	4.1e-166	PREDICTED: putative late blight resistance protein homolog R1A-3 [Erythranthe guttata]	--	--	--	--	--	-	-	-	http://www.genome.jp/dbget-bin/www_bget?ko:-	Q6L3N7	647	4.5e-66	Putative late blight resistance protein homolog R1C-3 OS=Solanum demissum OX=50514 GN=R1C-3 PE=3 SV=1	PF00931//PF06305//PF04277//PF05875//PF04546//PF04647//PF04923//PF10541//PF00002//PF11705//PF10324//PF06728//PF00560	NB-ARC domain//Lipopolysaccharide assembly protein A domain//Oxaloacetate decarboxylase, gamma chain//Ceramidase//Sigma-70, non-essential region//Accessory gene regulator B//Ninjurin//Nuclear envelope localisation domain//7 transmembrane receptor (Secretin family)//DNA-directed RNA polymerase III subunit Rpc31//Serpentine type 7TM GPCR chemoreceptor Srw//GPI transamidase subunit PIG-U//Leucine Ri…	GO:0006352//GO:0009405//GO:0006090//GO:0007187//GO:0007186//GO:0009372//GO:0006383//GO:0006525//GO:0036376//GO:0016255//GO:0006672//GO:0006560//GO:0007155//GO:0006807//GO:0006814//GO:0006355//GO:0042246	DNA-templated transcription, initiation//pathogenesis//pyruvate metabolic process//G protein-coupled receptor signaling pathway, coupled to cyclic nucleotide second messenger//G protein-coupled receptor signaling pathway//quorum sensing//transcription by RNA polymerase III//arginine metabolic process//sodium ion export across plasma membrane//attachment of GPI anchor to protein//ceramide metaboli…	GO:0008948//GO:0008233//GO:0008528//GO:0003677//GO:0005515//GO:0043531//GO:0016811//GO:0004930//GO:0016987//GO:0015081//GO:0003700	oxaloacetate decarboxylase activity//peptidase activity//G protein-coupled peptide receptor activity//DNA binding//protein binding//ADP binding//hydrolase activity, acting on carbon-nitrogen (but not peptide) bonds, in linear amides//G protein-coupled receptor activity//sigma factor activity//sodium ion transmembrane transporter activity//DNA-binding transcription factor activity	GO:0016020//GO:0005667//GO:0005887//GO:0042765//GO:0016021	membrane//transcription regulator complex//integral component of plasma membrane//GPI-anchor transamidase complex//integral component of membrane	--	--	FALSE	-1.36377	0.0132526	FALSE	0.280335	0.801302	FALSE	-1.19406	0.0227544	FALSE	-1.44782	0.00778212	FALSE	-1.21734	0.0234789
Cluster-11149.28297	84.22	19.12	30.24	93.36	127.04	350	1600620552	TEY10953.1	177	7.6e-11	S-adenosylmethionine decarboxylase [Salvia splendens]	XM_020698940.1	XM_020698940	112	2.07e-49	PREDICTED: Sesamum indicum S-adenosylmethionine decarboxylase proenzyme-like (LOC105177577), mRNA	-	-	-	http://www.genome.jp/dbget-bin/www_bget?ko:-	--	--	--	--	--	--	--	--	--	--	--	--	--	--	DOWN	-2.00845	0.000324437	FALSE	-0.847985	0.173044	DOWN	-2.96657	1.45e-08	FALSE	0.479975	0.573992	FALSE	-0.417933	0.553883
Cluster-11149.11963	3.86	0.3	0.6	2.41	2.57	989	--	--	--	--	--	XM_020698940.1	XM_020698940	69	4.99e-25	PREDICTED: Sesamum indicum S-adenosylmethionine decarboxylase proenzyme-like (LOC105177577), mRNA	--	--	--	--	--	--	--	--	PF01529	DHHC palmitoyltransferase	GO:0042967	obsolete acyl-carrier-protein biosynthetic process	GO:0016409	palmitoyltransferase activity	--	--	--	--	DOWN	-2.77909	0.00177371	FALSE	-0.490003	0.677692	DOWN	-3.37381	1.58e-05	FALSE	1.34951	0.038355	FALSE	0.809402	0.245987
Cluster-11149.17546	0	0.77	1.36	0.6	6.4	533	1169238	Q07346.1	217	2.7e-15	RecName: Full=Glutamate decarboxylase; Short=GAD	XM_030605236.1	XM_030605236	68	9.37e-25	PREDICTED: Syzygium oleosum glutamate decarboxylase (LOC115681325), mRNA	K01580	E4.1.1.15, gadB, gadA, GAD	glutamate decarboxylase	http://www.genome.jp/dbget-bin/www_bget?ko:K01580	Q07346	217	1e-16	Glutamate decarboxylase OS=Petunia hybrida OX=4102 GN=GAD PE=1 SV=1	PF00282	Pyridoxal-dependent decarboxylase conserved domain	GO:0019752	carboxylic acid metabolic process	GO:0030170//GO:0016831	pyridoxal phosphate binding//carboxy-lyase activity	--	--	--	--	FALSE	0.569873	1	DOWN	-3.76986	8.66e-06	DOWN	-3.30688	2.56e-05	FALSE	-4.75444	0.557126	DOWN	-8.29822	1.69e-07
Cluster-11149.42661	0.4	1.15	0.68	1.52	3.24	2463	747072270	XP_011083041.1	2602	3.4e-291	pentatricopeptide repeat-containing protein At4g19191, mitochondrial [Sesamum indicum]	XM_011084739.2	XM_011084739	844	0	PREDICTED: Sesamum indicum pentatricopeptide repeat-containing protein At4g19191, mitochondrial (LOC105165659), mRNA	-	-	-	http://www.genome.jp/dbget-bin/www_bget?ko:-	P0C8Q2	1731	1.3e-191	Pentatricopeptide repeat-containing protein At4g19191, mitochondrial OS=Arabidopsis thaliana OX=3702 GN=PCMP-E1 PE=2 SV=1	PF03306	Alpha-acetolactate decarboxylase	GO:0045151	acetoin biosynthetic process	GO:0047605	acetolactate decarboxylase activity	--	--	--	--	FALSE	-0.199672	1	FALSE	-1.48476	0.0088742	DOWN	-1.79483	0.000767293	FALSE	-1.24651	0.093697	DOWN	-2.77996	1.41e-06
Cluster-11149.31570	24.33	11.17	9.82	38.8	47.26	732	1276257841	PIN15304.1	755	1.5e-77	Leucine-rich repeat protein [Handroanthus impetiginosus]	--	--	--	--	--	-	-	-	http://www.genome.jp/dbget-bin/www_bget?ko:-	C0LGP4	365	9.5e-34	Probable LRR receptor-like serine/threonine-protein kinase At3g47570 OS=Arabidopsis thaliana OX=3702 GN=At3g47570 PE=2 SV=1	PF00957//PF13516//PF00069//PF13855//PF00560//PF07714//PF03977	Synaptobrevin//Leucine Rich repeat//Protein kinase domain//Leucine rich repeat//Leucine Rich Repeat//Protein tyrosine and serine/threonine kinase//Na+-transporting oxaloacetate decarboxylase beta subunit	GO:0006468//GO:0016192//GO:0006814	protein phosphorylation//vesicle-mediated transport//sodium ion transport	GO:0016829//GO:0004672//GO:0005515//GO:0005524	lyase activity//protein kinase activity//protein binding//ATP binding	GO:0016021	integral component of membrane	--	--	DOWN	-1.58242	0.00343082	FALSE	-0.683317	0.304914	DOWN	-2.37629	1.33e-06	FALSE	-0.00725847	1	FALSE	-0.740518	0.185039
Cluster-11149.17547	54.72	51.96	32.28	22.64	166.3	625	1527606323	XP_027079513.1	903	8.8e-95	glutamate decarboxylase-like [Coffea arabica]	XM_011087598.2	XM_011087598	336	1.16e-173	PREDICTED: Sesamum indicum glutamate decarboxylase (LOC105167783), mRNA	K01580	E4.1.1.15, gadB, gadA, GAD	glutamate decarboxylase	http://www.genome.jp/dbget-bin/www_bget?ko:K01580	Q07346	862	1.9e-91	Glutamate decarboxylase OS=Petunia hybrida OX=4102 GN=GAD PE=1 SV=1	PF00282	Pyridoxal-dependent decarboxylase conserved domain	GO:0019752	carboxylic acid metabolic process	GO:0030170//GO:0016831	pyridoxal phosphate binding//carboxy-lyase activity	--	--	--	--	FALSE	1.4171	0.00908377	DOWN	-3.27572	3.82e-11	DOWN	-1.96939	3.48e-05	UP	1.93548	0.000139966	DOWN	-1.39014	0.00480551
Cluster-11149.23354	46.88	44.71	28.36	20.67	146.81	1476	1024056098	KZV53803.1	725	9.2e-74	glutamate decarboxylase [Dorcoceras hygrometricum]	XM_011087598.2	XM_011087598	224	5.16e-111	PREDICTED: Sesamum indicum glutamate decarboxylase (LOC105167783), mRNA	K01580	E4.1.1.15, gadB, gadA, GAD	glutamate decarboxylase	http://www.genome.jp/dbget-bin/www_bget?ko:K01580	Q07346	587	3.5e-59	Glutamate decarboxylase OS=Petunia hybrida OX=4102 GN=GAD PE=1 SV=1	PF00282	Pyridoxal-dependent decarboxylase conserved domain	GO:0019752	carboxylic acid metabolic process	GO:0016831//GO:0030170	carboxy-lyase activity//pyridoxal phosphate binding	--	--	KOG1383	Glutamate decarboxylase/sphingosine phosphate lyase	FALSE	1.3168	0.0135839	DOWN	-3.22517	3.42e-11	DOWN	-2.01915	1.73e-05	UP	1.85432	0.000181269	DOWN	-1.42082	0.00350324
Cluster-11149.7693	0.6	0.89	1.13	4.36	6.07	2283	848919913	XP_012856941.1	410	4.8e-37	PREDICTED: putative late blight resistance protein homolog R1B-8 [Erythranthe guttata]	--	--	--	--	--	K13457	RPM1, RPS3	disease resistance protein RPM1	http://www.genome.jp/dbget-bin/www_bget?ko:K13457	--	--	--	--	PF03711//PF00931	Orn/Lys/Arg decarboxylase, C-terminal domain//NB-ARC domain	--	--	GO:0003824//GO:0043531	catalytic activity//ADP binding	--	--	--	--	DOWN	-2.09337	0.000195789	FALSE	-0.87398	0.156531	DOWN	-3.0774	5.78e-09	DOWN	-2.17176	0.00017837	DOWN	-3.09482	1.38e-08
Cluster-11149.42610	2.13	2.57	0.14	1.47	0.76	1209	1052176018	XP_017697664.1	524	1.5e-50	L10-interacting MYB domain-containing protein-like [Phoenix dactylifera]	--	--	--	--	--	K13484	TTHL	5-hydroxyisourate hydrolase / 2-oxo-4-hydroxy-4-carboxy-5-ureidoimidazoline decarboxylase [EC:3.5.2.17 4.1.1.97]	http://www.genome.jp/dbget-bin/www_bget?ko:K13484	Q9FFJ8	372	2.4e-34	L10-interacting MYB domain-containing protein OS=Arabidopsis thaliana OX=3702 GN=LIMYB PE=1 SV=1	PF08447	PAS fold	--	--	GO:0005515	protein binding	--	--	--	--	FALSE	1.00438	0.208719	FALSE	0.548959	0.727156	FALSE	1.44231	0.0407236	FALSE	1.19658	0.110626	FALSE	1.6943	0.0178617
Cluster-11149.30541	8.73	2.56	5.69	24.14	32.47	625	--	--	--	--	--	XM_020698940.1	XM_020698940	40	4.08e-09	PREDICTED: Sesamum indicum S-adenosylmethionine decarboxylase proenzyme-like (LOC105177577), mRNA	--	--	--	--	--	--	--	--	--	--	--	--	--	--	--	--	--	--	DOWN	-3.01009	2.26e-07	FALSE	-0.827002	0.194047	DOWN	-3.94644	1.21e-12	FALSE	-0.80319	0.245748	DOWN	-1.67989	0.00132636
Cluster-11149.44222	0.7	0.61	0.1	1.48	0.6	679	--	--	--	--	--	XM_011084169.2	XM_011084169	81	7.19e-32	PREDICTED: Sesamum indicum UDP-glucuronic acid decarboxylase 2 (LOC105165224), mRNA	--	--	--	--	--	--	--	--	--	--	--	--	--	--	--	--	--	--	FALSE	-1.04402	0.576666	FALSE	0.885555	0.649299	FALSE	-0.265997	0.971209	FALSE	-0.415305	1	FALSE	0.418932	1
Cluster-11149.30540	11.31	3.17	3.44	15.37	21.36	1557	--	--	--	--	--	XM_020698940.1	XM_020698940	72	1.71e-26	PREDICTED: Sesamum indicum S-adenosylmethionine decarboxylase proenzyme-like (LOC105177577), mRNA	--	--	--	--	--	--	--	--	--	--	--	--	--	--	--	--	--	--	DOWN	-2.07334	7.08e-05	FALSE	-0.871676	0.144338	DOWN	-3.05549	7.1e-10	FALSE	0.231409	0.896692	FALSE	-0.69022	0.227251
Cluster-11149.17545	63.61	45.61	28.7	27.19	181.56	418	1229776722	XP_022141496.1	544	2.5e-53	glutamate decarboxylase [Momordica charantia]	XM_009782522.1	XM_009782522	175	2.39e-84	PREDICTED: Nicotiana sylvestris glutamate decarboxylase (LOC104229813), mRNA	K01580	E4.1.1.15, gadB, gadA, GAD	glutamate decarboxylase	http://www.genome.jp/dbget-bin/www_bget?ko:K01580	Q42521	521	4.4e-52	Glutamate decarboxylase 1 OS=Arabidopsis thaliana OX=3702 GN=GAD1 PE=1 SV=2	PF00282	Pyridoxal-dependent decarboxylase conserved domain	GO:0019752	carboxylic acid metabolic process	GO:0016831//GO:0030170	carboxy-lyase activity//pyridoxal phosphate binding	--	--	--	--	FALSE	0.991933	0.120854	DOWN	-3.13974	4.57e-10	DOWN	-2.25851	3.05e-06	UP	1.87127	0.00039507	FALSE	-1.31827	0.00907954
Cluster-11149.44848	4.13	0.12	0.38	6.92	2.99	2133	--	--	--	--	--	--	--	--	--	--	--	--	--	--	--	--	--	--	PF01536	Adenosylmethionine decarboxylase	GO:0008295//GO:0006597//GO:0006525//GO:0006560	spermidine biosynthetic process//spermine biosynthetic process//arginine metabolic process//proline metabolic process	GO:0004014	adenosylmethionine decarboxylase activity	--	--	--	--	DOWN	-5.65385	9.66e-17	FALSE	0.812886	0.210977	DOWN	-4.94534	1.19e-12	FALSE	-0.0685811	1	FALSE	0.694204	0.263109
Cluster-11149.40100	100.19	5.79	23.2	96.23	202.46	705	1600678302	TEY60386.1	480	1.1e-45	hypothetical protein Saspl_035298 [Salvia splendens]	XM_012984813.1	XM_012984813	132	3.34e-60	PREDICTED: Erythranthe guttatus uncharacterized LOC105960621 (LOC105960621), mRNA	-	-	-	http://www.genome.jp/dbget-bin/www_bget?ko:-	--	--	--	--	PF04277	Oxaloacetate decarboxylase, gamma chain	GO:0036376//GO:0006560//GO:0006525//GO:0006814//GO:0006090	sodium ion export across plasma membrane//proline metabolic process//arginine metabolic process//sodium ion transport//pyruvate metabolic process	GO:0008948//GO:0015081	oxaloacetate decarboxylase activity//sodium ion transmembrane transporter activity	GO:0016020	membrane	--	--	DOWN	-3.83789	1.11e-13	DOWN	-1.47196	0.00391071	DOWN	-5.42009	4.45e-24	FALSE	0.723255	0.25415	FALSE	-0.798691	0.136208
Cluster-11149.7207	0.55	0.37	0.27	3.57	2.76	1561	1276242202	PIN03175.1	161	2.4e-08	hypothetical protein CDL12_24306 [Handroanthus impetiginosus]	--	--	--	--	--	-	-	-	http://www.genome.jp/dbget-bin/www_bget?ko:-	--	--	--	--	PF00170//PF01484//PF03709//PF12125//PF02096	bZIP transcription factor//Nematode cuticle collagen N-terminal domain//Orn/Lys/Arg decarboxylase, N-terminal domain//D domain of beta-TrCP//60Kd inner membrane protein	GO:0006355	regulation of transcription, DNA-templated	GO:0042302//GO:0016831//GO:0003700//GO:0032977//GO:0046983	structural constituent of cuticle//carboxy-lyase activity//DNA-binding transcription factor activity//membrane insertase activity//protein dimerization activity	GO:0016021//GO:0005667	integral component of membrane//transcription regulator complex	--	--	DOWN	-3.05802	4.6e-06	FALSE	-0.022521	1	DOWN	-3.18853	1.09e-06	DOWN	-2.02153	0.0023813	DOWN	-2.0927	0.0011599
Cluster-11149.21201	3.29	4.07	0.94	2.99	9.88	788	1276246337	PIN06199.1	748	1.1e-76	Serine/threonine protein kinase [Handroanthus impetiginosus]	XM_011019291.1	XM_011019291	62	3.07e-21	PREDICTED: Populus euphratica wall-associated receptor kinase-like 10 (LOC105120890), mRNA	-	-	-	http://www.genome.jp/dbget-bin/www_bget?ko:-	Q9S9M5	459	1.3e-44	Wall-associated receptor kinase-like 1 OS=Arabidopsis thaliana OX=3702 GN=WAKL1 PE=2 SV=1	PF00069//PF02894//PF02100//PF07714	Protein kinase domain//Oxidoreductase family, C-terminal alpha/beta domain//Ornithine decarboxylase antizyme//Protein tyrosine and serine/threonine kinase	GO:0019467//GO:0006468//GO:0055114	ornithine catabolic process, by decarboxylation//protein phosphorylation//oxidation-reduction process	GO:0008073//GO:0005524//GO:0004672//GO:0016491	ornithine decarboxylase inhibitor activity//ATP binding//protein kinase activity//oxidoreductase activity	--	--	--	--	FALSE	0.656558	0.530741	DOWN	-2.11864	0.000238951	DOWN	-1.57254	0.00498737	FALSE	0.800296	0.379302	FALSE	-1.36757	0.0217757
Cluster-11149.43732	0.21	0.32	2.85	76.78	30.58	2066	747096955	XP_011096418.1	2731	3.2e-306	pyruvate decarboxylase 1 [Sesamum indicum]	XM_011098116.2	XM_011098116	1130	0	PREDICTED: Sesamum indicum pyruvate decarboxylase 1 (LOC105175619), mRNA	-	-	-	http://www.genome.jp/dbget-bin/www_bget?ko:-	P51850	2601	1.4e-292	Pyruvate decarboxylase 1 OS=Pisum sativum OX=3888 GN=PDC1 PE=2 SV=1	PF02775//PF02776//PF00205	Thiamine pyrophosphate enzyme, C-terminal TPP binding domain//Thiamine pyrophosphate enzyme, N-terminal TPP binding domain//Thiamine pyrophosphate enzyme, central domain	--	--	GO:0030976//GO:0000287//GO:0003824	thiamine pyrophosphate binding//magnesium ion binding//catalytic activity	--	--	KOG1184	Thiamine pyrophosphate-requiring enzyme	DOWN	-7.71403	2.04e-35	FALSE	0.931893	0.0997609	DOWN	-6.89039	9.69e-30	DOWN	-7.8264	8.13e-35	DOWN	-6.94137	1.66e-28
Cluster-11149.2227	0.04	0.35	0.04	1.39	0.47	1255	1173788473	XP_020548774.1	1802	1e-198	LRR receptor kinase BAK1 [Sesamum indicum]	XM_020693117.1	XM_020693117	659	0	PREDICTED: Sesamum indicum LRR receptor kinase BAK1 (LOC105161173), transcript variant X4, mRNA	K04733	IRAK4	interleukin-1 receptor-associated kinase 4	http://www.genome.jp/dbget-bin/www_bget?ko:K04733	B8BB68	484	2.6e-47	LRR receptor kinase BAK1 OS=Oryza sativa subsp. indica OX=39946 GN=BAK1 PE=2 SV=1	PF04277//PF07714//PF00069	Oxaloacetate decarboxylase, gamma chain//Protein tyrosine and serine/threonine kinase//Protein kinase domain	GO:0006468//GO:0006560//GO:0036376//GO:0006525//GO:0006814//GO:0006090	protein phosphorylation//proline metabolic process//sodium ion export across plasma membrane//arginine metabolic process//sodium ion transport//pyruvate metabolic process	GO:0004672//GO:0008948//GO:0005524//GO:0015081	protein kinase activity//oxaloacetate decarboxylase activity//ATP binding//sodium ion transmembrane transporter activity	GO:0016020	membrane	--	--	FALSE	-1.76609	0.0683422	FALSE	1.15263	0.255925	FALSE	-0.721285	0.650006	DOWN	-4.23944	0.000797271	FALSE	-3.11372	0.0633846
Cluster-11149.38186	2.4	4.25	2.7	10.72	36.09	2589	1130478559	APU50937.1	504	6.8e-48	mevalonate diphosphate decarboxylase [Phlomis umbrosa]	MK035035.1	MK035035	223	3.29e-110	Scutellaria barbata mevalonate diphosphate decarboxylase (MDD1) mRNA, complete cds	K01597	MVD, mvaD	diphosphomevalonate decarboxylase	http://www.genome.jp/dbget-bin/www_bget?ko:K01597	D0EAP4	401	2.3e-37	Diphosphomevalonate decarboxylase 1 OS=Panax ginseng OX=4054 GN=MVD1 PE=2 SV=2	--	--	--	--	--	--	--	--	KOG2833	Mevalonate pyrophosphate decarboxylase	FALSE	-1.13253	0.0484562	DOWN	-2.14701	1.07e-05	DOWN	-3.3902	2.6e-12	FALSE	-1.48146	0.00601084	DOWN	-3.67826	9.71e-14
Cluster-11149.524	0.32	0.26	0.62	0.45	8.55	1458	604299483	EYU19378.1	1515	2.2e-165	hypothetical protein MIMGU_mgv1a006611mg [Erythranthe guttata]	XM_012971814.1	XM_012971814	391	0	PREDICTED: Erythranthe guttatus serine decarboxylase-like (LOC105948593), mRNA	K01590	hdc, HDC	histidine decarboxylase	http://www.genome.jp/dbget-bin/www_bget?ko:K01590	Q9MA74	1279	2e-139	Serine decarboxylase OS=Arabidopsis thaliana OX=3702 GN=SDC PE=1 SV=1	PF00282	Pyridoxal-dependent decarboxylase conserved domain	GO:0019752	carboxylic acid metabolic process	GO:0030170//GO:0016831	pyridoxal phosphate binding//carboxy-lyase activity	--	--	--	--	FALSE	-0.621009	0.90417	DOWN	-4.61593	2.63e-14	DOWN	-5.34383	1.83e-16	FALSE	0.147116	1	DOWN	-4.51464	4.85e-13
Cluster-11149.23630	2.07	2.53	0.75	0.33	12.27	1661	604299215	EYU19150.1	2270	7.2e-253	hypothetical protein MIMGU_mgv1a004865mg [Erythranthe guttata]	KU640395.1	KU640395	1496	0	Rehmannia glutinosa tyrosine decarboxylase (TyDC) mRNA, complete cds	K01592	E4.1.1.25	tyrosine decarboxylase	http://www.genome.jp/dbget-bin/www_bget?ko:K01592	P54768	1941	3.9e-216	Tyrosine/DOPA decarboxylase 1 OS=Papaver somniferum OX=3469 GN=TYDC1 PE=2 SV=1	PF00155//PF01304//PF01212//PF00282	Aminotransferase class I and II//Gas vesicles protein GVPc repeated domain//Beta-eliminating lyase//Pyridoxal-dependent decarboxylase conserved domain	GO:0006520//GO:0019752//GO:0031412//GO:0009058	cellular amino acid metabolic process//carboxylic acid metabolic process//gas vesicle organization//biosynthetic process	GO:0030170//GO:0016829//GO:0016831	pyridoxal phosphate binding//lyase activity//carboxy-lyase activity	GO:0031411	gas vesicle	KOG0628	Aromatic-L-amino-acid/L-histidine decarboxylase	UP	3.12857	4.11e-06	DOWN	-5.59877	5.33e-19	DOWN	-2.58149	2.56e-07	UP	3.31034	1.21e-06	DOWN	-2.33674	4.87e-06
Cluster-11149.12176	3.2	0.17	0.38	1.1	6.41	1285	1279757442	XP_022955727.1	273	2.1e-21	glutamate decarboxylase 1-like isoform X1 [Cucurbita moschata]	XM_011087598.2	XM_011087598	109	3.8e-47	PREDICTED: Sesamum indicum glutamate decarboxylase (LOC105167783), mRNA	K01580	E4.1.1.15, gadB, gadA, GAD	glutamate decarboxylase	http://www.genome.jp/dbget-bin/www_bget?ko:K01580	Q42521	263	1.1e-21	Glutamate decarboxylase 1 OS=Arabidopsis thaliana OX=3702 GN=GAD1 PE=1 SV=2	PF00282	Pyridoxal-dependent decarboxylase conserved domain	GO:0019752	carboxylic acid metabolic process	GO:0030170//GO:0016831	pyridoxal phosphate binding//carboxy-lyase activity	--	--	--	--	FALSE	-2.45785	0.02551	DOWN	-2.93047	2.37e-07	DOWN	-5.49144	1.16e-14	UP	2.20338	0.000313353	FALSE	-0.776425	0.206334
Cluster-11149.634	0.03	0.24	0.09	0.17	1.71	1709	747073900	XP_011083927.1	1760	1e-193	glutamate receptor 2.7-like [Sesamum indicum]	XM_011085625.2	XM_011085625	374	0	PREDICTED: Sesamum indicum glutamate receptor 2.7-like (LOC105166318), mRNA	K05387	GRIP	glutamate receptor, ionotropic, plant	http://www.genome.jp/dbget-bin/www_bget?ko:K05387	O81776	621	4.6e-63	Glutamate receptor 2.4 OS=Arabidopsis thaliana OX=3702 GN=GLR2.4 PE=2 SV=2	PF10613//PF03709	Ligated ion channel L-glutamate- and glycine-binding site//Orn/Lys/Arg decarboxylase, N-terminal domain	GO:0007165//GO:0006811//GO:0007268	signal transduction//ion transport//chemical synaptic transmission	GO:0004970//GO:0016831	ionotropic glutamate receptor activity//carboxy-lyase activity	GO:0016020	membrane	--	--	FALSE	0.666859	0.835728	DOWN	-3.66628	1.85e-06	DOWN	-3.10787	1.26e-05	FALSE	-1.80983	0.54395	DOWN	-5.49815	3.86e-08
Cluster-11149.10991	1.19	0.14	0.36	5.5	7.37	859	--	--	--	--	--	XM_020698940.1	XM_020698940	72	9.27e-27	PREDICTED: Sesamum indicum S-adenosylmethionine decarboxylase proenzyme-like (LOC105177577), mRNA	--	--	--	--	--	--	--	--	--	--	--	--	--	--	--	--	--	--	DOWN	-4.96266	3.55e-08	FALSE	-0.820173	0.258456	DOWN	-5.87813	2.95e-13	FALSE	-1.53171	0.0345087	DOWN	-2.40038	0.000122628
Cluster-11149.46764	1.36	0.68	0.32	5.77	6.78	692	566192021	XP_006378724.1	294	4.1e-24	UDP-glucuronic acid decarboxylase 6 [Populus trichocarpa]	XM_011095509.2	XM_011095509	129	1.52e-58	PREDICTED: Sesamum indicum UDP-glucuronic acid decarboxylase 6-like (LOC105173667), mRNA	K08678	UXS1, uxs	UDP-glucuronate decarboxylase	http://www.genome.jp/dbget-bin/www_bget?ko:K08678	Q9ZV36	256	3.9e-21	UDP-glucuronic acid decarboxylase 6 OS=Arabidopsis thaliana OX=3702 GN=UXS6 PE=2 SV=1	--	--	--	--	--	--	--	--	KOG1429	dTDP-glucose 4-6-dehydratase/UDP-glucuronic acid decarboxylase	DOWN	-2.85833	0.000270345	FALSE	-0.628766	0.485866	DOWN	-3.59337	4.97e-07	FALSE	-1.41358	0.093697	DOWN	-2.09062	0.00152752
Cluster-11149.4891	0.77	1.22	1.39	5.33	50.46	1904	604332470	EYU37130.1	1435	5.5e-156	hypothetical protein MIMGU_mgv1a008734mg [Erythranthe guttata]	XM_011081144.2	XM_011081144	382	0	PREDICTED: Sesamum indicum S-adenosylmethionine decarboxylase proenzyme-like (LOC105162963), mRNA	K01611	speD, AMD1	S-adenosylmethionine decarboxylase	http://www.genome.jp/dbget-bin/www_bget?ko:K01611	O24575	1063	2.9e-114	S-adenosylmethionine decarboxylase proenzyme OS=Zea mays OX=4577 GN=SAMDC PE=2 SV=1	PF01536	Adenosylmethionine decarboxylase	GO:0008295//GO:0006597//GO:0006525//GO:0006560	spermidine biosynthetic process//spermine biosynthetic process//arginine metabolic process//proline metabolic process	GO:0004014	adenosylmethionine decarboxylase activity	--	--	KOG0788	S-adenosylmethionine decarboxylase	DOWN	-1.91727	0.000749317	DOWN	-3.63822	2.95e-13	DOWN	-5.6656	2.7e-25	DOWN	-2.11763	0.000232089	DOWN	-5.80485	3.3e-25
Cluster-11149.3611	0.05	0.05	0.05	1	13.33	2016	1173792674	XP_011077895.2	1899	9.2e-210	uncharacterized protein LOC105161781 [Sesamum indicum]	XM_011079593.2	XM_011079593	585	0	PREDICTED: Sesamum indicum arginine decarboxylase-like (LOC105161781), mRNA	-	-	-	http://www.genome.jp/dbget-bin/www_bget?ko:-	P21885	772	1.7e-80	Arginine decarboxylase OS=Bacillus subtilis (strain 168) OX=224308 GN=speA PE=1 SV=2	PF00155//PF01212//PF01053//PF00282//PF13545//PF03711//PF05889//PF01194//PF01276	Aminotransferase class I and II//Beta-eliminating lyase//Cys/Met metabolism PLP-dependent enzyme//Pyridoxal-dependent decarboxylase conserved domain//Crp-like helix-turn-helix domain//Orn/Lys/Arg decarboxylase, C-terminal domain//O-phosphoseryl-tRNA(Sec) selenium transferase, SepSecS//RNA polymerases N / 8 kDa subunit//Orn/Lys/Arg decarboxylase, major domain	GO:0006206//GO:0006520//GO:0006351//GO:0006144//GO:0009058//GO:0006355//GO:0019346//GO:0019752	pyrimidine nucleobase metabolic process//cellular amino acid metabolic process//transcription, DNA-templated//purine nucleobase metabolic process//biosynthetic process//regulation of transcription, DNA-templated//transsulfuration//carboxylic acid metabolic process	GO:0016829//GO:0030170//GO:0016740//GO:0016831//GO:0003677//GO:0003899//GO:0003824	lyase activity//pyridoxal phosphate binding//transferase activity//carboxy-lyase activity//DNA binding//DNA-directed 5'-3' RNA polymerase activity//catalytic activity	GO:0005730	nucleolus	--	--	DOWN	-4.05338	9.48e-05	DOWN	-4.12412	1.73e-14	DOWN	-8.27284	4.17e-28	DOWN	-3.6506	0.000341124	DOWN	-7.81071	1.57e-24
Cluster-11149.423	0	0	0	0.23	2.63	1919	1344006914	XP_023885913.1	823	5.1e-85	phosphatidylserine decarboxylase proenzyme, mitochondrial-like [Quercus suber]	XM_025739901.1	XM_025739901	59	3.57e-19	Tilletiopsis washingtonensis phosphatidylserine decarboxylase (FA09DRAFT_286383), partial mRNA	K01613	psd, PISD	phosphatidylserine decarboxylase	http://www.genome.jp/dbget-bin/www_bget?ko:K01613	O14333	865	2.6e-91	Phosphatidylserine decarboxylase proenzyme 1, mitochondrial OS=Schizosaccharomyces pombe (strain 972 / ATCC 24843) OX=284812 GN=psd1 PE=3 SV=4	PF02666//PF03910	Phosphatidylserine decarboxylase//Adenovirus minor core protein PV	GO:0006563//GO:0006566//GO:0008654//GO:0006544//GO:0046486	L-serine metabolic process//threonine metabolic process//phospholipid biosynthetic process//glycine metabolic process//glycerolipid metabolic process	GO:0004609//GO:0003677	phosphatidylserine decarboxylase activity//DNA binding	GO:0019012	virion	KOG2420	Phosphatidylserine decarboxylase	FALSE	-6.0657	0.0663758	DOWN	-3.90587	3.98e-09	DOWN	-9.81617	2.53e-14	FALSE	-5.89436	0.093697	DOWN	-9.57563	3.8e-13
Cluster-6637.0	0	0	0	0.17	3.7	495	1344035984	XP_023905285.1	533	5.6e-52	uroporphyrinogen decarboxylase-like [Quercus suber]	--	--	--	--	--	K01599	hemE, UROD	uroporphyrinogen decarboxylase	http://www.genome.jp/dbget-bin/www_bget?ko:K01599	Q9USJ5	456	1.8e-44	Uroporphyrinogen decarboxylase OS=Schizosaccharomyces pombe (strain 972 / ATCC 24843) OX=284812 GN=hem12 PE=3 SV=2	PF01208	Uroporphyrinogen decarboxylase (URO-D)	GO:0015994//GO:0006779	chlorophyll metabolic process//porphyrin-containing compound biosynthetic process	GO:0004853	uroporphyrinogen decarboxylase activity	--	--	KOG2872	Uroporphyrinogen decarboxylase	FALSE	-3.05854	1	DOWN	-4.63112	0.000514039	DOWN	-7.54222	5.5e-05	FALSE	-2.90649	1	DOWN	-7.30279	0.000200198
Cluster-4405.0	0	0	0	0	1.96	581	1344035984	XP_023905285.1	682	3.5e-69	uroporphyrinogen decarboxylase-like [Quercus suber]	XM_003347467.1	XM_003347467	168	2.64e-80	Sordaria macrospora k-hell uncharacterized protein (SMAC_04821), partial mRNA	K01599	hemE, UROD	uroporphyrinogen decarboxylase	http://www.genome.jp/dbget-bin/www_bget?ko:K01599	P32347	622	1.2e-63	Uroporphyrinogen decarboxylase OS=Saccharomyces cerevisiae (strain ATCC 204508 / S288c) OX=559292 GN=HEM12 PE=1 SV=1	PF01208	Uroporphyrinogen decarboxylase (URO-D)	GO:0006779//GO:0015994	porphyrin-containing compound biosynthetic process//chlorophyll metabolic process	GO:0004853	uroporphyrinogen decarboxylase activity	--	--	KOG2872	Uroporphyrinogen decarboxylase	FALSE	-5.13e-15	1	DOWN	-7.14501	0.00112797	DOWN	-7.05988	0.00098774	FALSE	0	1	DOWN	-6.82102	0.00255923
Cluster-4585.0	0	0	0	0.17	3.32	1016	1344043506	XP_023901702.1	936	2.1e-98	phosphatidylserine decarboxylase proenzyme 3-like [Quercus suber]	XM_007767953.1	XM_007767953	178	1.31e-85	Coniophora puteana RWD-64-598 SS2 hypothetical protein mRNA	K01613	psd, PISD	phosphatidylserine decarboxylase	http://www.genome.jp/dbget-bin/www_bget?ko:K01613	O14111	841	8.5e-89	Phosphatidylserine decarboxylase proenzyme 3 OS=Schizosaccharomyces pombe (strain 972 / ATCC 24843) OX=284812 GN=psd3 PE=3 SV=2	PF02666//PF09300	Phosphatidylserine decarboxylase//Tectiviridae, minor capsid	GO:0006566//GO:0046486//GO:0006563//GO:0006544//GO:0008654	threonine metabolic process//glycerolipid metabolic process//L-serine metabolic process//glycine metabolic process//phospholipid biosynthetic process	GO:0004609	phosphatidylserine decarboxylase activity	GO:0019028	viral capsid	KOG2419	Phosphatidylserine decarboxylase	FALSE	-4.52318	0.566119	DOWN	-4.65764	2.4e-08	DOWN	-9.02755	2.34e-10	FALSE	-4.35711	0.806498	DOWN	-8.78722	2.44e-09
Cluster-2125.0	0	0	0	0	2.65	608	1344043506	XP_023901702.1	427	1.4e-39	phosphatidylserine decarboxylase proenzyme 3-like [Quercus suber]	--	--	--	--	--	K01613	psd, PISD	phosphatidylserine decarboxylase	http://www.genome.jp/dbget-bin/www_bget?ko:K01613	C4R360	278	9.7e-24	Phosphatidylserine decarboxylase proenzyme 2 OS=Komagataella phaffii (strain GS115 / ATCC 20864) OX=644223 GN=PSD2 PE=3 SV=1	PF02666	Phosphatidylserine decarboxylase	GO:0008654//GO:0006544//GO:0046486//GO:0006563//GO:0006566	phospholipid biosynthetic process//glycine metabolic process//glycerolipid metabolic process//L-serine metabolic process//threonine metabolic process	GO:0004609	phosphatidylserine decarboxylase activity	--	--	KOG2419	Phosphatidylserine decarboxylase	FALSE	-5.13e-15	1	DOWN	-7.69431	4.77e-05	DOWN	-7.60898	3.74e-05	FALSE	0	1	DOWN	-7.36949	0.000133624
Cluster-4882.0	0	0	0	0.36	0.94	844	1173960952	OQS07033.1	375	2e-33	S-adenosylmethionine decarboxylase proenzyme [Thraustotheca clavata]	--	--	--	--	--	K01611	speD, AMD1	S-adenosylmethionine decarboxylase	http://www.genome.jp/dbget-bin/www_bget?ko:K01611	Q9P7E3	384	6.9e-36	S-adenosylmethionine decarboxylase proenzyme OS=Schizosaccharomyces pombe (strain 972 / ATCC 24843) OX=284812 GN=spe2 PE=2 SV=1	PF01536	Adenosylmethionine decarboxylase	GO:0008295//GO:0006597//GO:0006525//GO:0006560	spermidine biosynthetic process//spermine biosynthetic process//arginine metabolic process//proline metabolic process	GO:0004014	adenosylmethionine decarboxylase activity	--	--	KOG0788	S-adenosylmethionine decarboxylase	FALSE	-5.23483	0.244997	FALSE	-1.7742	0.156531	DOWN	-6.8551	0.00238337	FALSE	-5.06564	0.362672	FALSE	-6.61653	0.00625347
Cluster-11149.47296	0	0	0	0	1.6	546	1344032700	XP_023899511.1	523	8.9e-51	ornithine decarboxylase-like [Quercus suber]	XM_018523535.1	XM_018523535	211	3.09e-104	Alternaria alternata ornithine decarboxylase partial mRNA	K01581	E4.1.1.17, ODC1, speC, speF	ornithine decarboxylase	http://www.genome.jp/dbget-bin/www_bget?ko:K01581	P27121	540	3.6e-54	Ornithine decarboxylase OS=Neurospora crassa (strain ATCC 24698 / 74-OR23-1A / CBS 708.71 / DSM 1257 / FGSC 987) OX=367110 GN=spe-1 PE=2 SV=1	PF02784	Pyridoxal-dependent decarboxylase, pyridoxal binding domain	--	--	GO:0003824	catalytic activity	--	--	KOG0622	Ornithine decarboxylase	FALSE	-5.13e-15	1	FALSE	-6.70126	0.00966091	FALSE	-6.61635	0.00586292	FALSE	0	1	FALSE	-6.37819	0.0158209
Cluster-11149.49328	0	0	0	0	2.34	656	1344032700	XP_023899511.1	678	1.1e-68	ornithine decarboxylase-like [Quercus suber]	XM_018323647.1	XM_018323647	172	1.8e-82	Purpureocillium lilacinum ornithine decarboxylase (VFPFJ_06572), partial mRNA	K01581	E4.1.1.17, ODC1, speC, speF	ornithine decarboxylase	http://www.genome.jp/dbget-bin/www_bget?ko:K01581	P27121	727	9e-76	Ornithine decarboxylase OS=Neurospora crassa (strain ATCC 24698 / 74-OR23-1A / CBS 708.71 / DSM 1257 / FGSC 987) OX=367110 GN=spe-1 PE=2 SV=1	PF02784	Pyridoxal-dependent decarboxylase, pyridoxal binding domain	--	--	GO:0003824	catalytic activity	--	--	KOG0622	Ornithine decarboxylase	FALSE	-5.13e-15	1	DOWN	-7.69431	4.77e-05	DOWN	-7.60898	3.74e-05	FALSE	0	1	DOWN	-7.36949	0.000133624
Cluster-5432.0	0	0	0	0.15	1.68	816	1344015721	XP_023890568.1	715	7.3e-73	ornithine decarboxylase-like [Quercus suber]	XM_018808267.1	XM_018808267	99	8.6e-42	Trichoderma gamsii ornithine decarboxylase (TGAM01_v204350), partial mRNA	K01581	E4.1.1.17, ODC1, speC, speF	ornithine decarboxylase	http://www.genome.jp/dbget-bin/www_bget?ko:K01581	P27121	865	1.1e-91	Ornithine decarboxylase OS=Neurospora crassa (strain ATCC 24698 / 74-OR23-1A / CBS 708.71 / DSM 1257 / FGSC 987) OX=367110 GN=spe-1 PE=2 SV=1	PF00278//PF02784	Pyridoxal-dependent decarboxylase, C-terminal sheet domain//Pyridoxal-dependent decarboxylase, pyridoxal binding domain	--	--	GO:0003824	catalytic activity	--	--	KOG0622	Ornithine decarboxylase	FALSE	-3.96925	0.835728	DOWN	-3.79125	0.000365013	DOWN	-7.60898	3.74e-05	FALSE	-3.80692	0.806498	DOWN	-7.36949	0.000133624
Cluster-11149.950	0	0	0	0.16	3.81	2091	326494872	BAJ94555.1	1087	1.4e-115	predicted protein [Hordeum vulgare subsp. vulgare]	XM_008041754.1	XM_008041754	99	2.26e-41	Trametes versicolor FP-101664 SS1 ornithine decarboxylase partial mRNA	K01581	E4.1.1.17, ODC1, speC, speF	ornithine decarboxylase	http://www.genome.jp/dbget-bin/www_bget?ko:K01581	Q9UQW9	1015	1.2e-108	Ornithine decarboxylase OS=Schizosaccharomyces pombe (strain 972 / ATCC 24843) OX=284812 GN=spe1 PE=2 SV=1	PF00278//PF02784	Pyridoxal-dependent decarboxylase, C-terminal sheet domain//Pyridoxal-dependent decarboxylase, pyridoxal binding domain	--	--	GO:0003824	catalytic activity	--	--	KOG0622	Ornithine decarboxylase	FALSE	-5.70927	0.101362	DOWN	-4.93774	1.21e-13	DOWN	-10.4919	3.35e-18	FALSE	-5.5387	0.148189	DOWN	-10.2512	7.66e-17
Cluster-1081.0	0	0	0	0	2.14	1478	1344051220	XP_023908832.1	1324	3.2e-143	uncharacterized protein LOC112020505 [Quercus suber]	XM_028638151.1	XM_028638151	134	5.55e-61	Verticillium nonalfalfae L-aspartate decarboxylase dtxS4 (DTXS4), partial mRNA	K01580	E4.1.1.15, gadB, gadA, GAD	glutamate decarboxylase	http://www.genome.jp/dbget-bin/www_bget?ko:K01580	E9FCP7	1442	2.5e-158	L-aspartate decarboxylase dtxS4 OS=Metarhizium robertsii (strain ARSEF 23 / ATCC MYA-3075) OX=655844 GN=dtxS4 PE=3 SV=2	PF00282//PF01212	Pyridoxal-dependent decarboxylase conserved domain//Beta-eliminating lyase	GO:0019752//GO:0006520	carboxylic acid metabolic process//cellular amino acid metabolic process	GO:0016829//GO:0016831//GO:0030170	lyase activity//carboxy-lyase activity//pyridoxal phosphate binding	--	--	KOG0629	Glutamate decarboxylase and related proteins	FALSE	-5.13e-15	1	DOWN	-9.16115	2.29e-10	DOWN	-9.07555	1.47e-10	FALSE	0	1	DOWN	-8.83521	1.47e-09
Cluster-6036.0	0	0	0	0.24	1.37	784	194690536	ACF79352.1	1102	9.4e-118	unknown [Zea mays]	XM_018852846.1	XM_018852846	183	1.66e-88	Isaria fumosorosea ARSEF 2679 glutamate decarboxylase (ISF_09243), partial mRNA	K01580	E4.1.1.15, gadB, gadA, GAD	glutamate decarboxylase	http://www.genome.jp/dbget-bin/www_bget?ko:K01580	Q42521	883	8.8e-94	Glutamate decarboxylase 1 OS=Arabidopsis thaliana OX=3702 GN=GAD1 PE=1 SV=2	PF01276//PF00282	Orn/Lys/Arg decarboxylase, major domain//Pyridoxal-dependent decarboxylase conserved domain	GO:0019752	carboxylic acid metabolic process	GO:0016831//GO:0003824//GO:0030170	carboxy-lyase activity//catalytic activity//pyridoxal phosphate binding	--	--	KOG1383	Glutamate decarboxylase/sphingosine phosphate lyase	FALSE	-4.52318	0.566119	FALSE	-2.86888	0.0106402	DOWN	-7.23918	0.000420682	FALSE	-4.35711	0.806498	DOWN	-7.00009	0.00106677
Cluster-1973.0	0	0	0	0	1.56	443	1344032700	XP_023899511.1	450	2.1e-42	ornithine decarboxylase-like [Quercus suber]	LR026990.1	LR026990	65	3.58e-23	Blumeria graminis f. sp. tritici genome assembly, chromosome: Bgt_-07	K01581	E4.1.1.17, ODC1, speC, speF	ornithine decarboxylase	http://www.genome.jp/dbget-bin/www_bget?ko:K01581	P27121	468	6.6e-46	Ornithine decarboxylase OS=Neurospora crassa (strain ATCC 24698 / 74-OR23-1A / CBS 708.71 / DSM 1257 / FGSC 987) OX=367110 GN=spe-1 PE=2 SV=1	PF00278	Pyridoxal-dependent decarboxylase, C-terminal sheet domain	--	--	GO:0003824	catalytic activity	--	--	KOG0622	Ornithine decarboxylase	FALSE	-5.13e-15	1	FALSE	-6.05708	0.0575446	FALSE	-5.97265	0.0376684	FALSE	0	1	FALSE	-5.73599	0.0636174
Cluster-11149.546	0	0	0	0.21	2.19	861	1344034895	XP_023900650.1	158	3e-08	L-aspartate decarboxylase dtxS4-like, partial [Quercus suber]	--	--	--	--	--	K01580	E4.1.1.15, gadB, gadA, GAD	glutamate decarboxylase	http://www.genome.jp/dbget-bin/www_bget?ko:K01580	J7GQ11	393	6.4e-37	L-tyrosine decarboxylase OS=Lactobacillus brevis OX=1580 GN=tdc PE=1 SV=1	PF01276//PF00282	Orn/Lys/Arg decarboxylase, major domain//Pyridoxal-dependent decarboxylase conserved domain	GO:0019752	carboxylic acid metabolic process	GO:0016831//GO:0030170//GO:0003824	carboxy-lyase activity//pyridoxal phosphate binding//catalytic activity	--	--	KOG0629	Glutamate decarboxylase and related proteins	FALSE	-4.52318	0.566119	DOWN	-3.73154	7.04e-05	DOWN	-8.1016	1.48e-06	FALSE	-4.35711	0.806498	DOWN	-7.86172	6.53e-06
Cluster-2992.0	0	0	0	0	2.6	649	1344041018	XP_023907942.1	460	2.2e-43	diphosphomevalonate decarboxylase-like [Quercus suber]	XM_009260555.1	XM_009260555	166	3.85e-79	Fusarium pseudograminearum CS3096 hypothetical protein partial mRNA	K01597	MVD, mvaD	diphosphomevalonate decarboxylase	http://www.genome.jp/dbget-bin/www_bget?ko:K01597	P32377	383	6.9e-36	Diphosphomevalonate decarboxylase OS=Saccharomyces cerevisiae (strain ATCC 204508 / S288c) OX=559292 GN=MVD1 PE=1 SV=2	PF03368//PF00288	Dicer dimerisation domain//GHMP kinases N terminal domain	GO:0051252	regulation of RNA metabolic process	GO:0016891//GO:0005524	endoribonuclease activity, producing 5'-phosphomonoesters//ATP binding	--	--	KOG2833	Mevalonate pyrophosphate decarboxylase	FALSE	-5.13e-15	1	DOWN	-7.81926	2.28e-05	DOWN	-7.7339	1.76e-05	FALSE	0	1	DOWN	-7.4943	6.05e-05
Cluster-248.0	0	0	0	0	3.21	424	1344045783	XP_023902951.1	279	1.4e-22	sphingosine-1-phosphate lyase-like [Quercus suber]	--	--	--	--	--	K01634	SGPL1, DPL1	sphinganine-1-phosphate aldolase	http://www.genome.jp/dbget-bin/www_bget?ko:K01634	Q9C509	214	1.8e-16	Sphingosine-1-phosphate lyase OS=Arabidopsis thaliana OX=3702 GN=DPL1 PE=1 SV=1	--	--	--	--	--	--	--	--	KOG1383	Glutamate decarboxylase/sphingosine phosphate lyase	FALSE	-5.13e-15	1	DOWN	-6.94013	0.00260569	DOWN	-6.8551	0.00238337	FALSE	0	1	FALSE	-6.61653	0.00625347
Cluster-11149.48145	0	0	0	0.1	1.58	686	1343975210	XP_023871803.1	244	2.5e-18	orotidine 5'-phosphate decarboxylase-like [Quercus suber]	--	--	--	--	--	K13421	UMPS	uridine monophosphate synthetase [EC:2.4.2.10 4.1.1.23]	http://www.genome.jp/dbget-bin/www_bget?ko:K13421	P14017	333	4.6e-30	Orotidine 5'-phosphate decarboxylase OS=Acremonium chrysogenum OX=5044 GN=PYR4 PE=3 SV=1	PF00215	Orotidine 5'-phosphate decarboxylase / HUMPS family	GO:0006206//GO:0006207	pyrimidine nucleobase metabolic process//'de novo' pyrimidine nucleobase biosynthetic process	GO:0004590	orotidine-5'-phosphate decarboxylase activity	--	--	KOG1377	Uridine 5'- monophosphate synthase/orotate phosphoribosyltransferase	FALSE	-3.05854	1	DOWN	-4.24108	0.00449402	DOWN	-7.15232	0.000641706	FALSE	-2.90649	1	DOWN	-6.91333	0.0016462
Cluster-11149.1238	0	0	0	0.36	3.21	962	--	--	--	--	--	--	--	--	--	--	--	--	--	--	Q9HFU8	130	2.2e-06	Ornithine decarboxylase antizyme OS=Schizosaccharomyces octosporus OX=4899 GN=spa1 PE=3 SV=1	PF02100	Ornithine decarboxylase antizyme	GO:0019467	ornithine catabolic process, by decarboxylation	GO:0008073	ornithine decarboxylase inhibitor activity	--	--	--	--	FALSE	-5.49146	0.158449	DOWN	-3.53647	6.24e-06	DOWN	-8.87314	1.31e-09	FALSE	-5.32147	0.233253	DOWN	-8.63287	9.22e-09
Cluster-2325.0	0	0	0	0	5.19	330	--	--	--	--	--	--	--	--	--	--	--	--	--	--	Q9NHZ4	138	9e-08	Ornithine decarboxylase antizyme OS=Pristionchus pacificus OX=54126 PE=2 SV=1	PF02100	Ornithine decarboxylase antizyme	GO:0019467	ornithine catabolic process, by decarboxylation	GO:0008073	ornithine decarboxylase inhibitor activity	--	--	--	--	FALSE	-5.13e-15	1	FALSE	-6.56514	0.0149166	FALSE	-6.48032	0.00923724	FALSE	0	1	FALSE	-6.24242	0.0245024
Cluster-11149.47238	0	0	0	0.19	2.28	913	1344045639	XP_023902873.1	307	1.7e-25	epsin-1-like [Quercus suber]	--	--	--	--	--	--	--	--	--	Q12518	228	9.2e-18	Epsin-1 OS=Saccharomyces cerevisiae (strain ATCC 204508 / S288c) OX=559292 GN=ENT1 PE=1 SV=1	PF04277	Oxaloacetate decarboxylase, gamma chain	GO:0006525//GO:0036376//GO:0006560//GO:0006814//GO:0006090	arginine metabolic process//sodium ion export across plasma membrane//proline metabolic process//sodium ion transport//pyruvate metabolic process	GO:0008948//GO:0015081	oxaloacetate decarboxylase activity//sodium ion transmembrane transporter activity	GO:0016020	membrane	--	--	FALSE	-4.52318	0.566119	DOWN	-3.90606	1.69e-05	DOWN	-8.27608	2.86e-07	FALSE	-4.35711	0.806498	DOWN	-8.0361	1.63e-06
Cluster-11149.46445	0	0	0	0.29	3.75	1547	1344084497	XP_023926311.1	271	4.2e-21	uncharacterized protein LOC112037716 [Quercus suber]	XM_031184027.1	XM_031184027	84	3.63e-33	Fusarium oxysporum NRRL 32931 uncharacterized protein (FOYG_08152), mRNA	--	--	--	--	--	--	--	--	PF07722//PF02100//PF03839	Peptidase C26//Ornithine decarboxylase antizyme//Translocation protein Sec62	GO:0015031//GO:0019467	protein transport//ornithine catabolic process, by decarboxylation	GO:0008073//GO:0016787	ornithine decarboxylase inhibitor activity//hydrolase activity	GO:0030176	integral component of endoplasmic reticulum membrane	--	--	FALSE	-6.0657	0.0663758	DOWN	-4.05348	8.28e-10	DOWN	-9.96376	3.9e-15	FALSE	-5.89436	0.093697	DOWN	-9.7232	6.72e-14
Cluster-1650.0	0	0	0	0	1.64	1146	1344017515	XP_023891518.1	1022	2.6e-108	bifunctional purine biosynthetic protein ADE1-like [Quercus suber]	CP016232.1	CP016232	266	1.79e-134	Trichoderma reesei QM6a chromosome I, complete sequence	K01945	purD	phosphoribosylamine--glycine ligase	http://www.genome.jp/dbget-bin/www_bget?ko:K01945	Q99148	1084	6.3e-117	Bifunctional purine biosynthetic protein ADE1 OS=Yarrowia lipolytica (strain CLIB 122 / E 150) OX=284591 GN=ADE1 PE=3 SV=1	PF02786//PF02655//PF02844//PF00215	Carbamoyl-phosphate synthase L chain, ATP binding domain//ATP-grasp domain//Phosphoribosylglycinamide synthetase, N domain//Orotidine 5'-phosphate decarboxylase / HUMPS family	GO:0009113//GO:0006206//GO:0006207//GO:0006144	purine nucleobase biosynthetic process//pyrimidine nucleobase metabolic process//'de novo' pyrimidine nucleobase biosynthetic process//purine nucleobase metabolic process	GO:0046872//GO:0004637//GO:0004590//GO:0005524	metal ion binding//phosphoribosylamine-glycine ligase activity//orotidine-5'-phosphate decarboxylase activity//ATP binding	--	--	KOG0237	Glycinamide ribonucleotide synthetase (GARS)/Aminoimidazole ribonucleotide synthetase (AIRS)	FALSE	-5.13e-15	1	DOWN	-8.31988	5.76e-07	DOWN	-8.2344	3.92e-07	FALSE	0	1	DOWN	-7.99444	2.29e-06
Cluster-11149.1980	0	0	0	0.35	10.52	1098	--	--	--	--	--	--	--	--	--	--	--	--	--	--	--	--	--	--	PF08447//PF02675	PAS fold//S-adenosylmethionine decarboxylase	GO:0008295//GO:0006525//GO:0006560	spermidine biosynthetic process//arginine metabolic process//proline metabolic process	GO:0005515//GO:0004014	protein binding//adenosylmethionine decarboxylase activity	--	--	--	--	FALSE	-5.70927	0.101362	DOWN	-5.2823	1.38e-15	DOWN	-10.8364	2.74e-20	FALSE	-5.5387	0.148189	DOWN	-10.5957	7.36e-19
Cluster-11149.46853	0	0	0	0.14	2.73	2045	1344040607	XP_023907718.1	1776	1.7e-195	calnexin homolog [Quercus suber]	XM_959607.3	XM_959607	555	0	Neurospora crassa OR74A calreticulin (NCU09265), mRNA	K08054	CANX	calnexin	http://www.genome.jp/dbget-bin/www_bget?ko:K08054	Q6Q487	1770	3.2e-196	Calnexin homolog OS=Neosartorya fumigata (strain ATCC MYA-4609 / Af293 / CBS 101355 / FGSC A1100) OX=330879 GN=AFUA_4G12850 PE=2 SV=2	PF04277//PF00262	Oxaloacetate decarboxylase, gamma chain//Calreticulin family	GO:0006525//GO:0006560//GO:0006457//GO:0036376//GO:0006814//GO:0006090	arginine metabolic process//proline metabolic process//protein folding//sodium ion export across plasma membrane//sodium ion transport//pyruvate metabolic process	GO:0051082//GO:0005509//GO:0008948//GO:0015081	unfolded protein binding//calcium ion binding//oxaloacetate decarboxylase activity//sodium ion transmembrane transporter activity	GO:0016020//GO:0005783	membrane//endoplasmic reticulum	KOG0675	Calnexin	FALSE	-5.49146	0.158449	DOWN	-4.63988	1.55e-11	DOWN	-9.97646	3.36e-15	FALSE	-5.32147	0.233253	DOWN	-9.73589	5.69e-14
Cluster-161.0	0	0	0	0	2.28	837	1333464571	PNR37724.1	951	3.2e-100	hypothetical protein PHYPA_020833 [Physcomitrella patens]	XM_007692405.1	XM_007692405	149	1.42e-69	Bipolaris oryzae ATCC 44560 hypothetical protein partial mRNA	K06215	pdxS, pdx1	pyridoxal 5'-phosphate synthase pdxS subunit	http://www.genome.jp/dbget-bin/www_bget?ko:K06215	B9LIK3	941	1.8e-100	Pyridoxal 5'-phosphate synthase subunit PdxS OS=Chloroflexus aurantiacus (strain ATCC 29364 / DSM 637 / Y-400-fl) OX=480224 GN=pdxS PE=3 SV=1	PF03060//PF00218//PF01207//PF00977//PF00215//PF04131	Nitronate monooxygenase//Indole-3-glycerol phosphate synthase//Dihydrouridine synthase (Dus)//Histidine biosynthesis protein//Orotidine 5'-phosphate decarboxylase / HUMPS family//Putative N-acetylmannosamine-6-phosphate epimerase	GO:0006207//GO:0008033//GO:0000105//GO:0055114//GO:0006571//GO:0006206//GO:0000162//GO:0006051//GO:0006040//GO:0006807//GO:0009094	'de novo' pyrimidine nucleobase biosynthetic process//tRNA processing//histidine biosynthetic process//oxidation-reduction process//tyrosine biosynthetic process//pyrimidine nucleobase metabolic process//tryptophan biosynthetic process//N-acetylmannosamine metabolic process//amino sugar metabolic process//nitrogen compound metabolic process//L-phenylalanine biosynthetic process	GO:0004425//GO:0047465//GO:0050660//GO:0018580//GO:0004590//GO:0017150	indole-3-glycerol-phosphate synthase activity//N-acylglucosamine-6-phosphate 2-epimerase activity//flavin adenine dinucleotide binding//nitronate monooxygenase activity//orotidine-5'-phosphate decarboxylase activity//tRNA dihydrouridine synthase activity	--	--	KOG1606	Stationary phase-induced protein, SOR/SNZ family	FALSE	-5.13e-15	1	DOWN	-8.18705	1.47e-06	DOWN	-8.1016	1.48e-06	FALSE	0	1	DOWN	-7.86172	6.53e-06
Cluster-2888.0	0	0	0	0	2.8	543	1395922818	PXF48794.1	427	1.2e-39	putative methylenetetrahydrofolate reductase [Gracilariopsis chorda]	XM_003032778.1	XM_003032778	56	4.48e-18	Schizophyllum commune H4-8 hypothetical protein, mRNA	K00297	metF, MTHFR	methylenetetrahydrofolate reductase (NADPH)	http://www.genome.jp/dbget-bin/www_bget?ko:K00297	P53128	392	5.3e-37	Methylenetetrahydrofolate reductase 2 OS=Saccharomyces cerevisiae (strain ATCC 204508 / S288c) OX=559292 GN=MET13 PE=1 SV=2	PF01536//PF02219//PF00590	Adenosylmethionine decarboxylase//Methylenetetrahydrofolate reductase//Tetrapyrrole (Corrin/Porphyrin) Methylases	GO:0046653//GO:0008295//GO:0055114//GO:0006597//GO:0006555//GO:0006525//GO:0006560	tetrahydrofolate metabolic process//spermidine biosynthetic process//oxidation-reduction process//spermine biosynthetic process//methionine metabolic process//arginine metabolic process//proline metabolic process	GO:0008168//GO:0004489//GO:0004014	methyltransferase activity//methylenetetrahydrofolate reductase (NAD(P)H) activity//adenosylmethionine decarboxylase activity	--	--	KOG0564	5,10-methylenetetrahydrofolate reductase	FALSE	-5.13e-15	1	DOWN	-7.4839	0.000224466	DOWN	-7.39864	0.000184311	FALSE	0	1	DOWN	-7.15937	0.000455599
Cluster-14015.0	0.31	0.77	0	0.6	0.77	532	--	--	--	--	--	--	--	--	--	--	K02902	RP-L28, MRPL28, rpmB	large subunit ribosomal protein L28	http://www.genome.jp/dbget-bin/www_bget?ko:K02902	--	--	--	--	PF01956//PF05296//PF00664//PF04277	Integral membrane protein EMC3/TMCO1-like//Taste receptor protein (TAS2R)//ABC transporter transmembrane region//Oxaloacetate decarboxylase, gamma chain	GO:0006814//GO:0006560//GO:0055085//GO:0050909//GO:0007186//GO:0006090//GO:0036376//GO:0006525//GO:0006810	sodium ion transport//proline metabolic process//transmembrane transport//sensory perception of taste//G protein-coupled receptor signaling pathway//pyruvate metabolic process//sodium ion export across plasma membrane//arginine metabolic process//transport	GO:0042626//GO:0015081//GO:0005524//GO:0004930//GO:0008948	ATPase-coupled transmembrane transporter activity//sodium ion transmembrane transporter activity//ATP binding//G protein-coupled receptor activity//oxaloacetate decarboxylase activity	GO:0016020//GO:0016021	membrane//integral component of membrane	--	--	FALSE	0.569873	1	FALSE	-0.726281	0.830424	FALSE	-0.264919	1	FALSE	-0.30747	1	FALSE	-1.07397	0.717726
Cluster-11149.47415	0	0	0	0.45	1.37	439	--	--	--	--	--	--	--	--	--	--	--	--	--	--	--	--	--	--	PF05292//PF03359	Malonyl-CoA decarboxylase C-terminal domain//Guanylate-kinase-associated protein (GKAP) protein	GO:0006633//GO:0023052//GO:0019482	fatty acid biosynthetic process//signaling//beta-alanine metabolic process	GO:0050080	malonyl-CoA decarboxylase activity	--	--	--	--	FALSE	-3.96925	0.835728	FALSE	-1.93524	0.485866	FALSE	-5.75408	0.101513	FALSE	-3.80692	0.806498	FALSE	-5.5181	0.104156
Cluster-11149.2818	1.38	0	0	0	0.66	310	--	--	--	--	--	--	--	--	--	--	--	--	--	--	--	--	--	--	PF05786//PF04277//PF00527	Condensin complex subunit 2//Oxaloacetate decarboxylase, gamma chain//E7 protein, Early protein	GO:0006814//GO:0006355//GO:0006090//GO:0007076//GO:0006525//GO:0036376//GO:0006560	sodium ion transport//regulation of transcription, DNA-templated//pyruvate metabolic process//mitotic chromosome condensation//arginine metabolic process//sodium ion export across plasma membrane//proline metabolic process	GO:0008948//GO:0015081//GO:0003700//GO:0003677	oxaloacetate decarboxylase activity//sodium ion transmembrane transporter activity//DNA-binding transcription factor activity//DNA binding	GO:0000796//GO:0016020//GO:0005667	condensin complex//membrane//transcription regulator complex	--	--	FALSE	-5.13e-15	1	FALSE	-3.3742	1	FALSE	-3.29695	1	FALSE	4.44697	0.806498	FALSE	1.10484	1
Cluster-11149.1868	0	0	0	0.03	2.11	1882	--	--	--	--	--	--	--	--	--	--	--	--	--	--	--	--	--	--	PF04277	Oxaloacetate decarboxylase, gamma chain	GO:0006560//GO:0036376//GO:0006525//GO:0006090//GO:0006814	proline metabolic process//sodium ion export across plasma membrane//arginine metabolic process//pyruvate metabolic process//sodium ion transport	GO:0015081//GO:0008948	sodium ion transmembrane transporter activity//oxaloacetate decarboxylase activity	GO:0016020	membrane	--	--	FALSE	-3.05854	1	DOWN	-6.55534	2.37e-12	DOWN	-9.46611	1.73e-12	FALSE	-2.90649	1	DOWN	-9.22565	2.27e-11
Cluster-9104.0	0.54	0.8	0	0.53	1.6	411	--	--	--	--	--	--	--	--	--	--	--	--	--	--	--	--	--	--	PF02329	Histidine carboxylase PI chain	GO:0006547	histidine metabolic process	GO:0004398	histidine decarboxylase activity	--	--	--	--	FALSE	0.80731	1	FALSE	-1.93524	0.485866	FALSE	-1.23421	0.596899	FALSE	0.640047	1	FALSE	-1.33072	0.53009
Cluster-944.0	0	0	0	0	3.47	373	1249607984	GAX97345.1	341	7.7e-30	40S ribosomal protein S10 [Pythium insidiosum]	XM_017636372.1	XM_017636372	179	1.26e-86	PREDICTED: Rhagoletis zephyria 40S ribosomal protein S10-like (LOC108380006), mRNA	K02947	RP-S10e, RPS10	small subunit ribosomal protein S10e	http://www.genome.jp/dbget-bin/www_bget?ko:K02947	Q962R9	396	1.2e-37	40S ribosomal protein S10 OS=Spodoptera frugiperda OX=7108 GN=RpS10 PE=2 SV=1	PF03186	CobD/Cbib protein	GO:0009236	cobalamin biosynthetic process	GO:0048472	threonine-phosphate decarboxylase activity	GO:0016021	integral component of membrane	KOG3344	40s ribosomal protein s10	FALSE	-5.13e-15	1	FALSE	-6.56514	0.0149166	FALSE	-6.48032	0.00923724	FALSE	0	1	FALSE	-6.24242	0.0245024
Cluster-11149.548	0	0	0	0	2.3	456	--	--	--	--	--	XM_009225299.1	XM_009225299	53	1.73e-16	Gaeumannomyces tritici R3-111a-1 hypothetical protein mRNA	--	--	--	--	A0A481NV25	214	1.9e-16	L-tyrosine decarboxylase OS=Enterococcus faecium OX=1352 GN=tdc PE=1 SV=1	PF00282	Pyridoxal-dependent decarboxylase conserved domain	GO:0019752	carboxylic acid metabolic process	GO:0030170//GO:0016831	pyridoxal phosphate binding//carboxy-lyase activity	--	--	--	--	FALSE	-5.13e-15	1	FALSE	-6.70126	0.00966091	FALSE	-6.61635	0.00586292	FALSE	0	1	FALSE	-6.37819	0.0158209
Cluster-11149.547	0	0	0	0.14	1.8	562	--	--	--	--	--	--	--	--	--	--	--	--	--	--	J7GQ11	210	6.9e-16	L-tyrosine decarboxylase OS=Lactobacillus brevis OX=1580 GN=tdc PE=1 SV=1	PF00282	Pyridoxal-dependent decarboxylase conserved domain	GO:0019752	carboxylic acid metabolic process	GO:0016831//GO:0030170	carboxy-lyase activity//pyridoxal phosphate binding	--	--	--	--	FALSE	-3.05854	1	FALSE	-3.94373	0.0137772	DOWN	-6.8551	0.00238337	FALSE	-2.90649	1	FALSE	-6.61653	0.00625347
Cluster-5171.0	0	0	0	0.36	0.91	486	--	--	--	--	--	--	--	--	--	--	--	--	--	--	O74758	261	7.3e-22	Uncharacterized protein C17D11.03c OS=Schizosaccharomyces pombe (strain 972 / ATCC 24843) OX=284812 GN=SPBC17D11.03c PE=4 SV=1	PF02627	Carboxymuconolactone decarboxylase family	GO:0055114	oxidation-reduction process	GO:0051920	peroxiredoxin activity	--	--	--	--	FALSE	-3.96925	0.835728	FALSE	-1.67724	0.622538	FALSE	-5.49639	0.165707	FALSE	-3.80692	0.806498	FALSE	-5.26135	0.169928
Cluster-1744.1	0	0	0	0	1.48	365	1344088989	XP_023928648.1	343	4.4e-30	tryptophan synthase-like [Quercus suber]	JN188079.1	JN188079	48	8.18e-14	Verticillium albo-atrum strain PD746 tryptophan synthase (TS) gene, partial cds >gb|JN188080.1| Verticillium albo-atrum strain PD747 tryptophan synthase (TS) gene, partial cds >gb|JN188081.1| Verticillium albo-atrum strain PD748 tryptophan synthase (TS) gene, partial cds	K01695	trpA	tryptophan synthase alpha chain	http://www.genome.jp/dbget-bin/www_bget?ko:K01695	P13228	398	7.1e-38	Tryptophan synthase OS=Neurospora crassa (strain ATCC 24698 / 74-OR23-1A / CBS 708.71 / DSM 1257 / FGSC 987) OX=367110 GN=trp-3 PE=1 SV=1	PF00290//PF03709//PF04055	Tryptophan synthase alpha chain//Orn/Lys/Arg decarboxylase, N-terminal domain//Radical SAM superfamily	GO:0006568//GO:0006571//GO:0009094//GO:0000162	tryptophan metabolic process//tyrosine biosynthetic process//L-phenylalanine biosynthetic process//tryptophan biosynthetic process	GO:0016831//GO:0004834//GO:0051536//GO:0003824	carboxy-lyase activity//tryptophan synthase activity//iron-sulfur cluster binding//catalytic activity	--	--	KOG4175	Tryptophan synthase alpha chain	FALSE	-5.13e-15	1	FALSE	-5.26588	0.357601	FALSE	-5.18243	0.273386	FALSE	0	1	FALSE	-4.9488	0.278772
Cluster-11149.1948	0.04	0.05	0	3.85	7.87	1205	1276271363	PIN26774.1	1060	1.1e-112	Transcription factor, Myb superfamily [Handroanthus impetiginosus]	XM_012989464.1	XM_012989464	273	2.42e-138	PREDICTED: Erythranthe guttatus transcription factor MYB39 (LOC105964958), mRNA	K09422	MYBP	myb proto-oncogene protein, plant	http://www.genome.jp/dbget-bin/www_bget?ko:K09422	Q9S9Z2	729	9.8e-76	Transcription factor MYB93 OS=Arabidopsis thaliana OX=3702 GN=MYB93 PE=1 SV=1	PF05870//PF09111	Phenolic acid decarboxylase (PAD)//SLIDE	GO:0006338	chromatin remodeling	GO:0016831//GO:0016818//GO:0005524//GO:0003676	carboxy-lyase activity//hydrolase activity, acting on acid anhydrides, in phosphorus-containing anhydrides//ATP binding//nucleic acid binding	GO:0005634	nucleus	--	--	DOWN	-6.02606	1.73e-09	FALSE	-1.42721	0.0121948	DOWN	-7.53457	8.2e-19	DOWN	-5.63382	1.21e-08	DOWN	-7.08495	3.97e-16
Cluster-11149.47276	0	0	0	0.91	13.23	2048	1343990830	XP_023877398.1	1334	3.1e-144	pyruvate decarboxylase-like [Quercus suber]	XM_020272755.1	XM_020272755	110	1.7e-47	Diplodia corticola pyruvate decarboxylase (BKCO1_2100095), partial mRNA	K01568	PDC, pdc	pyruvate decarboxylase	http://www.genome.jp/dbget-bin/www_bget?ko:K01568	Q4WXX9	1730	1.4e-191	Pyruvate decarboxylase OS=Neosartorya fumigata (strain ATCC MYA-4609 / Af293 / CBS 101355 / FGSC A1100) OX=330879 GN=pdcA PE=3 SV=1	PF02776//PF00205//PF02775	Thiamine pyrophosphate enzyme, N-terminal TPP binding domain//Thiamine pyrophosphate enzyme, central domain//Thiamine pyrophosphate enzyme, C-terminal TPP binding domain	--	--	GO:0003824//GO:0000287//GO:0030976	catalytic activity//magnesium ion binding//thiamine pyrophosphate binding	--	--	KOG1184	Thiamine pyrophosphate-requiring enzyme	DOWN	-8.16451	1.13e-06	DOWN	-4.24537	5.94e-15	DOWN	-12.2536	1.7e-29	DOWN	-7.99106	3.58e-05	DOWN	-12.0128	7.32e-28
Cluster-1793.0	0	0	0	0	1.57	525	1343990830	XP_023877398.1	378	5.6e-34	pyruvate decarboxylase-like [Quercus suber]	CP014692.1	CP014692	34	7.33e-06	Acetobacter aceti strain TMW2.1153, complete genome	K01568	PDC, pdc	pyruvate decarboxylase	http://www.genome.jp/dbget-bin/www_bget?ko:K01568	Q4WXX9	680	2e-70	Pyruvate decarboxylase OS=Neosartorya fumigata (strain ATCC MYA-4609 / Af293 / CBS 101355 / FGSC A1100) OX=330879 GN=pdcA PE=3 SV=1	PF00676//PF02775	Dehydrogenase E1 component//Thiamine pyrophosphate enzyme, C-terminal TPP binding domain	--	--	GO:0003824//GO:0016624//GO:0030976	catalytic activity//oxidoreductase activity, acting on the aldehyde or oxo group of donors, disulfide as acceptor//thiamine pyrophosphate binding	--	--	KOG1184	Thiamine pyrophosphate-requiring enzyme	FALSE	-5.13e-15	1	FALSE	-6.56514	0.0149166	FALSE	-6.48032	0.00923724	FALSE	0	1	FALSE	-6.24242	0.0245024
Cluster-2494.0	0	0	0	0	2.05	418	1343990830	XP_023877398.1	382	1.5e-34	pyruvate decarboxylase-like [Quercus suber]	--	--	--	--	--	K01568	PDC, pdc	pyruvate decarboxylase	http://www.genome.jp/dbget-bin/www_bget?ko:K01568	Q2UKV4	579	8.4e-59	Pyruvate decarboxylase OS=Aspergillus oryzae (strain ATCC 42149 / RIB 40) OX=510516 GN=pdcA PE=3 SV=1	PF02776	Thiamine pyrophosphate enzyme, N-terminal TPP binding domain	--	--	GO:0030976	thiamine pyrophosphate binding	--	--	KOG1184	Thiamine pyrophosphate-requiring enzyme	FALSE	-5.13e-15	1	FALSE	-6.24701	0.036604	FALSE	-6.16242	0.0233754	FALSE	0	1	FALSE	-5.92525	0.0393902
Cluster-4232.0	0	0	0	0.1	1.58	688	1343973865	XP_023871066.1	467	3.5e-44	pyruvate decarboxylase-like [Quercus suber]	--	--	--	--	--	K01568	PDC, pdc	pyruvate decarboxylase	http://www.genome.jp/dbget-bin/www_bget?ko:K01568	Q6FJA3	505	5.3e-50	Pyruvate decarboxylase OS=Candida glabrata (strain ATCC 2001 / CBS 138 / JCM 3761 / NBRC 0622 / NRRL Y-65) OX=284593 GN=PDC1 PE=3 SV=1	PF02776	Thiamine pyrophosphate enzyme, N-terminal TPP binding domain	--	--	GO:0030976	thiamine pyrophosphate binding	--	--	KOG1184	Thiamine pyrophosphate-requiring enzyme	FALSE	-3.05854	1	DOWN	-4.24108	0.00449402	DOWN	-7.15232	0.000641706	FALSE	-2.90649	1	DOWN	-6.91333	0.0016462
Cluster-984.0	0	0	0	0	1.61	464	194690536	ACF79352.1	303	2.5e-25	unknown [Zea mays]	--	--	--	--	--	K01580	E4.1.1.15, gadB, gadA, GAD	glutamate decarboxylase	http://www.genome.jp/dbget-bin/www_bget?ko:K01580	Q42521	153	2.3e-09	Glutamate decarboxylase 1 OS=Arabidopsis thaliana OX=3702 GN=GAD1 PE=1 SV=2	--	--	--	--	--	--	--	--	--	--	FALSE	-5.13e-15	1	FALSE	-6.24701	0.036604	FALSE	-6.16242	0.0233754	FALSE	0	1	FALSE	-5.92525	0.0393902
Cluster-11149.47926	0	0	0	7.26	3.69	472	1600639403	TEY24174.1	422	4e-39	hypothetical protein Saspl_044060 [Salvia splendens]	XM_011098116.2	XM_011098116	157	2.76e-74	PREDICTED: Sesamum indicum pyruvate decarboxylase 1 (LOC105175619), mRNA	-	-	-	http://www.genome.jp/dbget-bin/www_bget?ko:-	P51850	379	1.5e-35	Pyruvate decarboxylase 1 OS=Pisum sativum OX=3888 GN=PDC1 PE=2 SV=1	--	--	--	--	--	--	--	--	--	--	DOWN	-8.12717	1.56e-06	FALSE	0.572699	0.660344	DOWN	-7.39864	0.000184311	DOWN	-7.95373	4.94e-05	DOWN	-7.15937	0.000455599
Cluster-3256.0	0	0	0	0	2.3	380	1344061786	XP_023914451.1	239	5.3e-18	phosphatidylserine decarboxylase proenzyme 3-like [Quercus suber]	--	--	--	--	--	--	--	--	--	Q5AK66	151	3.2e-09	Phosphatidylserine decarboxylase proenzyme 2 OS=Candida albicans (strain SC5314 / ATCC MYA-2876) OX=237561 GN=PSD2 PE=3 SV=2	--	--	--	--	--	--	--	--	--	--	FALSE	-5.13e-15	1	FALSE	-6.05708	0.0575446	FALSE	-5.97265	0.0376684	FALSE	0	1	FALSE	-5.73599	0.0636174
Cluster-11149.595	0	0	0	0.14	2.47	1157	1344061786	XP_023914451.1	309	1.2e-25	phosphatidylserine decarboxylase proenzyme 3-like [Quercus suber]	--	--	--	--	--	-	-	-	http://www.genome.jp/dbget-bin/www_bget?ko:-	O14111	272	9.2e-23	Phosphatidylserine decarboxylase proenzyme 3 OS=Schizosaccharomyces pombe (strain 972 / ATCC 24843) OX=284812 GN=psd3 PE=3 SV=2	--	--	--	--	--	--	--	--	--	--	FALSE	-4.52318	0.566119	DOWN	-4.47578	1.42e-07	DOWN	-8.84572	1.69e-09	FALSE	-4.35711	0.806498	DOWN	-8.60546	1.22e-08
Cluster-1566.0	0	0	0	0	1.38	656	1344025946	XP_023895947.1	366	1.7e-32	probable oxalate decarboxylase ARB_04859 [Quercus suber]	--	--	--	--	--	-	-	-	http://www.genome.jp/dbget-bin/www_bget?ko:-	O34714	443	7.7e-43	Oxalate decarboxylase OxdC OS=Bacillus subtilis (strain 168) OX=224308 GN=oxdC PE=1 SV=1	PF00190	Cupin	--	--	GO:0045735	nutrient reservoir activity	--	--	--	--	FALSE	-5.13e-15	1	DOWN	-6.94013	0.00260569	DOWN	-6.8551	0.00238337	FALSE	0	1	FALSE	-6.61653	0.00625347
Cluster-3879.0	0	0	0	0.96	1.94	336	1343996724	XP_023880491.1	264	6e-21	uncharacterized protein LOC111992873 [Quercus suber]	--	--	--	--	--	K01598	PPCDC, coaC	phosphopantothenoylcysteine decarboxylase	http://www.genome.jp/dbget-bin/www_bget?ko:K01598	Q12600	165	6.8e-11	Protein SIS2 OS=Candida tropicalis OX=5482 GN=SIS2 PE=3 SV=1	PF02441	Flavoprotein	--	--	GO:0003824	catalytic activity	--	--	KOG0672	Halotolerance protein HAL3 (contains flavoprotein domain)	FALSE	-3.96925	0.835728	FALSE	-1.36283	0.794971	FALSE	-5.18243	0.273386	FALSE	-3.80692	0.806498	FALSE	-4.9488	0.278772
Cluster-11149.37410	1.61	0	0	0.39	1.4	465	--	--	--	--	--	XM_011096493.2	XM_011096493	84	1.03e-33	PREDICTED: Sesamum indicum UDP-glucuronic acid decarboxylase 1 (LOC105174398), mRNA	--	--	--	--	--	--	--	--	--	--	--	--	--	--	--	--	--	--	FALSE	-3.96925	0.835728	FALSE	-2.15403	0.361408	FALSE	-5.97265	0.0376684	FALSE	2.58956	0.093697	FALSE	0.390743	0.856968
Cluster-11149.38185	0	0	0	0.38	2.14	471	--	--	--	--	--	JN831105.1	JN831105	62	1.78e-21	Salvia miltiorrhiza mevalonate diphosphate decarboxylase (MDC) gene, complete cds	--	--	--	--	--	--	--	--	PF04162	Gyrovirus capsid protein (VP1)	--	--	--	--	GO:0019028	viral capsid	--	--	FALSE	-3.96925	0.835728	FALSE	-2.7982	0.0413052	FALSE	-6.61635	0.00586292	FALSE	-3.80692	0.806498	FALSE	-6.37819	0.0158209
Cluster-282.0	0	0	0	0	2.69	971	1344056231	XP_023911515.1	539	2.2e-52	bifunctional cytokinin biosynthesis protein-like [Quercus suber]	XM_018177847.1	XM_018177847	76	6.29e-29	Paraphaeosphaeria sporulosa lysine decarboxylase-like protein-like protein mRNA	-	-	-	http://www.genome.jp/dbget-bin/www_bget?ko:-	K3VH30	521	1e-51	Bifunctional cytokinin biosynthesis protein OS=Fusarium pseudograminearum (strain CS3096) OX=1028729 GN=FCK1 PE=1 SV=1	PF00781	Diacylglycerol kinase catalytic domain	--	--	GO:0016301	kinase activity	--	--	--	--	FALSE	-5.13e-15	1	DOWN	-8.72316	1.38e-08	DOWN	-8.63762	1.1e-08	FALSE	0	1	DOWN	-8.39745	9.22e-08
Cluster-901.0	0	0	0	0	1.94	494	1344043506	XP_023901702.1	232	4.5e-17	phosphatidylserine decarboxylase proenzyme 3-like [Quercus suber]	--	--	--	--	--	--	--	--	--	--	--	--	--	PF01226	Formate/nitrite transporter	GO:0055085	transmembrane transport	GO:0022857	transmembrane transporter activity	GO:0016020	membrane	--	--	FALSE	-5.13e-15	1	FALSE	-6.70126	0.00966091	FALSE	-6.61635	0.00586292	FALSE	0	1	FALSE	-6.37819	0.0158209
Cluster-2364.0	0	0	0	0	1.92	474	1344061786	XP_023914451.1	286	2.3e-23	phosphatidylserine decarboxylase proenzyme 3-like [Quercus suber]	CP019380.1	CP019380	42	2.35e-10	Trametes hirsuta strain 072 chromosome 7, complete sequence	--	--	--	--	--	--	--	--	PF10231//PF13499//PF00036//PF13405	Apoptogenic protein 1//EF-hand domain pair//EF hand//EF-hand domain	GO:0097193	intrinsic apoptotic signaling pathway	GO:0005509	calcium ion binding	--	--	--	--	FALSE	-5.13e-15	1	FALSE	-6.56514	0.0149166	FALSE	-6.48032	0.00923724	FALSE	0	1	FALSE	-6.24242	0.0245024
Cluster-11149.22046	329.46	115.49	173.01	445.28	729.33	1273	1173777413	XP_020554599.1	1224	1.1e-131	S-adenosylmethionine decarboxylase proenzyme-like [Sesamum indicum]	XM_020698940.1	XM_020698940	473	0	PREDICTED: Sesamum indicum S-adenosylmethionine decarboxylase proenzyme-like (LOC105177577), mRNA	K01611	speD, AMD1	S-adenosylmethionine decarboxylase	http://www.genome.jp/dbget-bin/www_bget?ko:K01611	Q96471	1060	4.3e-114	S-adenosylmethionine decarboxylase proenzyme OS=Ipomoea nil OX=35883 GN=SAMDC PE=3 SV=1	PF01536//PF05151	Adenosylmethionine decarboxylase//Photosystem II reaction centre M protein (PsbM)	GO:0015979//GO:0006597//GO:0019684//GO:0008295//GO:0006560//GO:0006525	photosynthesis//spermine biosynthetic process//photosynthesis, light reaction//spermidine biosynthetic process//proline metabolic process//arginine metabolic process	GO:0004014	adenosylmethionine decarboxylase activity	GO:0009523//GO:0016021	photosystem II//integral component of membrane	KOG0788	S-adenosylmethionine decarboxylase	DOWN	-1.74194	0.000440785	FALSE	-1.10903	0.0382018	DOWN	-2.96174	2.97e-10	FALSE	0.237368	0.865983	FALSE	-0.921671	0.0721111
Cluster-11149.35773	0.55	1.1	0.36	0	0	487	747066861	XP_011080126.1	171	5.2e-10	tyrosine decarboxylase 1 [Sesamum indicum]	XM_011081824.2	XM_011081824	85	3.02e-34	PREDICTED: Sesamum indicum tyrosine decarboxylase 1 (LOC105163472), mRNA	K01592	E4.1.1.25	tyrosine decarboxylase	http://www.genome.jp/dbget-bin/www_bget?ko:K01592	Q8RY79	155	1.4e-09	Tyrosine decarboxylase 1 OS=Arabidopsis thaliana OX=3702 GN=ELI5 PE=1 SV=1	--	--	--	--	--	--	--	--	KOG0628	Aromatic-L-amino-acid/L-histidine decarboxylase	FALSE	5.75	0.158449	FALSE	0	1	FALSE	5.48809	0.101513	FALSE	5.00971	0.362672	FALSE	4.7457	0.44892
Cluster-17772.0	0.21	0.43	0.21	4.98	0	453	848868799	XP_012835028.1	196	6.1e-13	PREDICTED: uncharacterized protein LOC105955780 [Erythranthe guttata]	XM_009622174.2	XM_009622174	63	4.75e-22	PREDICTED: Nicotiana tomentosiformis uncharacterized LOC104112295 (LOC104112295), mRNA	-	-	-	http://www.genome.jp/dbget-bin/www_bget?ko:-	--	--	--	--	PF03839//PF04086//PF15333//PF04277//PF08492//PF06524//PF02507	Translocation protein Sec62//Signal recognition particle, alpha subunit, N-terminal//TATA box-binding protein-associated factor 1D//Oxaloacetate decarboxylase, gamma chain//SRP72 RNA-binding domain//NOA36 protein//Photosystem I reaction centre subunit III	GO:0006614//GO:0015979//GO:0006814//GO:0006355//GO:0006886//GO:0006560//GO:0006090//GO:0006525//GO:0036376//GO:0015031	SRP-dependent cotranslational protein targeting to membrane//photosynthesis//sodium ion transport//regulation of transcription, DNA-templated//intracellular protein transport//proline metabolic process//pyruvate metabolic process//arginine metabolic process//sodium ion export across plasma membrane//protein transport	GO:0005525//GO:0003924//GO:0005047//GO:0015081//GO:0008948//GO:0008270//GO:0008312	GTP binding//GTPase activity//signal recognition particle binding//sodium ion transmembrane transporter activity//oxaloacetate decarboxylase activity//zinc ion binding//7S RNA binding	GO:0005634//GO:0005668//GO:0016020//GO:0005785//GO:0030176//GO:0009538//GO:0048500//GO:0005786//GO:0009522	nucleus//RNA polymerase transcription factor SL1 complex//membrane//signal recognition particle receptor complex//integral component of endoplasmic reticulum membrane//photosystem I reaction center//signal recognition particle//signal recognition particle, endoplasmic reticulum targeting//photosystem I	--	--	DOWN	-3.24234	0.00450047	UP	7.3896	0.000224466	FALSE	3.96602	0.705108	FALSE	-3.77533	0.0106323	FALSE	3.26447	1
Cluster-11149.37285	0.96	0.95	0.46	0	0	430	--	--	--	--	--	--	--	--	--	--	--	--	--	--	--	--	--	--	PF04277	Oxaloacetate decarboxylase, gamma chain	GO:0006814//GO:0006090//GO:0006525//GO:0036376//GO:0006560	sodium ion transport//pyruvate metabolic process//arginine metabolic process//sodium ion export across plasma membrane//proline metabolic process	GO:0008948//GO:0015081	oxaloacetate decarboxylase activity//sodium ion transmembrane transporter activity	GO:0016020	membrane	--	--	FALSE	5.17838	0.380656	FALSE	0	1	FALSE	4.91911	0.273386	FALSE	5.40998	0.233253	FALSE	5.14373	0.278772
Cluster-11149.8612	0	0	0	0	0	313	--	--	--	--	--	--	--	--	--	--	--	--	--	--	--	--	--	--	PF08496//PF14630//PF04277//PF03343	Peptidase family S49 N-terminal//Origin recognition complex (ORC) subunit 5 C-terminus//Oxaloacetate decarboxylase, gamma chain//SART-1 family	GO:0006260//GO:0006814//GO:0006090//GO:0000398//GO:0006525//GO:0036376//GO:0006560	DNA replication//sodium ion transport//pyruvate metabolic process//mRNA splicing, via spliceosome//arginine metabolic process//sodium ion export across plasma membrane//proline metabolic process	GO:0008948//GO:0015081//GO:0004252	oxaloacetate decarboxylase activity//sodium ion transmembrane transporter activity//serine-type endopeptidase activity	GO:0005634//GO:0005886//GO:0016020//GO:0000808	nucleus//plasma membrane//membrane//origin recognition complex	--	--	FALSE	-5.13e-15	1	FALSE	0	1	FALSE	0	1	FALSE	0	1	FALSE	0	1
Cluster-11045.0	0.91	3.03	2.47	0	0	582	--	--	--	--	--	--	--	--	--	--	--	--	--	--	--	--	--	--	PF01862	Pyruvoyl-dependent arginine decarboxylase (PvlArgDC)	GO:0006560//GO:0006527//GO:0006525	proline metabolic process//arginine catabolic process//arginine metabolic process	GO:0008792	arginine decarboxylase activity	--	--	--	--	UP	7.66865	5.17e-05	FALSE	0	1	UP	7.40273	0.000123201	FALSE	6.20629	0.0606833	FALSE	5.93704	0.0636174
Cluster-11149.43984	0	1.24	0.91	0	0	532	1173792674	XP_011077895.2	406	3.2e-37	uncharacterized protein LOC105161781 [Sesamum indicum]	--	--	--	--	--	-	-	-	http://www.genome.jp/dbget-bin/www_bget?ko:-	Q9K9K5	186	4e-13	Arginine decarboxylase OS=Bacillus halodurans (strain ATCC BAA-125 / DSM 18197 / FERM 7344 / JCM 9153 / C-125) OX=272558 GN=speA PE=3 SV=1	PF03711//PF05145	Orn/Lys/Arg decarboxylase, C-terminal domain//Transition state regulatory protein AbrB	GO:0010468	regulation of gene expression	GO:0003824	catalytic activity	GO:0016021	integral component of membrane	--	--	FALSE	6.15832	0.0416009	FALSE	0	1	FALSE	5.89507	0.062744	FALSE	0	1	FALSE	0	1
Cluster-11149.41480	0.95	0	0	0	0	521	--	--	--	--	--	HQ730226.1	HQ730226	47	4.32e-13	Phalaenopsis equestris clone PeWGSM076 microsatellite sequence	--	--	--	--	--	--	--	--	PF03709	Orn/Lys/Arg decarboxylase, N-terminal domain	--	--	GO:0016831	carboxy-lyase activity	--	--	--	--	FALSE	-5.13e-15	1	FALSE	0	1	FALSE	0	1	FALSE	5.98715	0.093697	FALSE	5.71856	0.104156
Cluster-11149.44375	0	0.48	0	1.2	0	427	1559640006	RWW62084.1	172	3.5e-10	hypothetical protein BHE74_00030809 [Ensete ventricosum]	XM_023103506.1	XM_023103506	51	2.09e-15	PREDICTED: Cucurbita moschata UDP-glucuronic acid decarboxylase 4-like (LOC111460303), mRNA	K08678	UXS1, uxs	UDP-glucuronate decarboxylase	http://www.genome.jp/dbget-bin/www_bget?ko:K08678	Q9LZI2	163	1.5e-10	UDP-glucuronic acid decarboxylase 2 OS=Arabidopsis thaliana OX=3702 GN=UXS2 PE=1 SV=1	--	--	--	--	--	--	--	--	--	--	FALSE	-1.01715	0.835728	FALSE	5.16593	0.357601	FALSE	3.96602	0.705108	FALSE	-5.06564	0.362672	FALSE	0	1
[truncated: 13 more columns]
