# Supplementary material for: Transcriptome Analysis Provides Insights into Catalpol Biosynthesis in the Medicinal Plant Rehmannia glutinosa and the Functional Characterization of RgGES Genes
Source: Genes (Basel). 2024 Jan 24;15(2):155. doi: 10.3390/genes15020155 (PMC10888080; doi:10.3390/genes15020155)
Supplement: Supplementary file 1 [file genes-15-00155-s001.zip › Supplementary Table S14.xlsx]

## Sheet: Sheet1
Supplementary Table S14. Putative hydroxylase and epoxidase genes involved in the catalpol biosynthesis.
	gene_id	Fpkm(HFL)	Fpkm(BJL)	Fpkm(J9L)	Fpkm(J9R)	Fpkm(J9AR)	Gene Length	NR GI	NR ID	NR Score	NR Evalue	NR Description	NT GI	NT ID	NT Score	NT Evalue	NT Description	KO ID	KO Name	KO Description	Http Link	Swissprot ID	Swissprot Score	Swissprot Evalue	Swissprot Description	PFAM ID	PFAM description	Gene Ontology Biological Pathway	BP Description	Gene Ontology Molecular Function	MF Description	Gene Ontology Cellular Component	CC Description	KOG ID	KOG Description	UP_DOWN_REGULATION(BJ_LvsJ9_R)	log2FC(BJ_LvsJ9_R)	q value(BJ_LvsJ9_R)	UP_DOWN_REGULATION(J9_RvsJ9_X)	log2FC(J9_RvsJ9_X)	q value(J9_RvsJ9_X)	UP_DOWN_REGULATION(BJ_LvsJ9_X)	log2FC(BJ_LvsJ9_X)	q value(BJ_LvsJ9_X)	UP_DOWN_REGULATION(HF_LvsJ9_R)	log2FC(HF_LvsJ9_R)	q value(HF_LvsJ9_R)	UP_DOWN_REGULATION(HF_LvsJ9_X)	log2FC(HF_LvsJ9_X)
Hydroxylase	Cluster-11149.26241	516.93	443.14	387.02	59.35	0.42	1972	1276247902	PIN07382.1	760	1.1e-77	Xyloglucan:xyloglucosyl transferase [Handroanthus impetiginosus]	XM_011101123.2	XM_011101123	265	1.12e-133	PREDICTED: Sesamum indicum probable xyloglucan endotransglucosylase/hydrolase protein 7 (LOC105177854), mRNA	K08235	E2.4.1.207	xyloglucan:xyloglucosyl transferase	http://www.genome.jp/dbget-bin/www_bget?ko:K08235	Q8LER3	632	2.8e-64	Probable xyloglucan endotransglucosylase/hydrolase protein 7 OS=Arabidopsis thaliana OX=3702 GN=XTH7 PE=2 SV=2	PF00722//PF05118//PF06955	Glycosyl hydrolases family 16//Aspartyl/Asparaginyl beta-hydroxylase//Xyloglucan endo-transglycosylase (XET) C-terminus	GO:0018193//GO:0005975//GO:0006073	peptidyl-amino acid modification//carbohydrate metabolic process//cellular glucan metabolic process	GO:0016762//GO:0004553	xyloglucan:xyloglucosyl transferase activity//hydrolase activity, hydrolyzing O-glycosyl compounds	GO:0005618//GO:0048046	cell wall//apoplast	--	--	UP	3.10231	1.1e-10	UP	6.72152	7.44e-28	UP	9.71249	3.78e-51	UP	3.797	7.57e-15	UP	10.4662
	Cluster-11149.25932	30.88	54.94	53.44	1.02	0.63	3686	747043680	XP_011085147.1	2294	2.6e-255	protein ECERIFERUM 1-like [Sesamum indicum]	XM_011086845.2	XM_011086845	931	0	PREDICTED: Sesamum indicum protein ECERIFERUM 1-like (LOC105167221), mRNA	K15404	K15404, CER1	aldehyde decarbonylase	http://www.genome.jp/dbget-bin/www_bget?ko:K15404	F4HVY0	1762	4.9e-195	Very-long-chain aldehyde decarbonylase CER1 OS=Arabidopsis thaliana OX=3702 GN=CER1 PE=1 SV=1	PF04116	Fatty acid hydroxylase superfamily	GO:0008610//GO:0055114	lipid biosynthetic process//oxidation-reduction process	GO:0016491//GO:0005506	oxidoreductase activity//iron ion binding	--	--	--	--	UP	5.95229	6.46e-28	FALSE	0.305947	0.835751	UP	6.14716	8.34e-29	UP	5.5974	2.22e-25	UP	5.85275
	Cluster-11149.21212	11.87	27.61	20.72	10.72	0.47	2373	747054100	XP_011073241.1	2951	0	protein ECERIFERUM 3-like isoform X1 [Sesamum indicum]	XM_011074939.2	XM_011074939	1093	0	PREDICTED: Sesamum indicum protein ECERIFERUM 3-like (LOC105158256), transcript variant X1, mRNA	-	-	-	http://www.genome.jp/dbget-bin/www_bget?ko:-	Q8H1Z0	2263	2.5e-253	Very-long-chain aldehyde decarbonylase CER3 OS=Arabidopsis thaliana OX=3702 GN=CER3 PE=1 SV=1	PF07936//PF04116	Potassium-channel blocking toxin//Fatty acid hydroxylase superfamily	GO:0055114//GO:0006810//GO:0009405//GO:0008610	oxidation-reduction process//transport//pathogenesis//lipid biosynthetic process	GO:0016491//GO:0090729//GO:0005506//GO:0008200	oxidoreductase activity//toxin activity//iron ion binding//ion channel inhibitor activity	GO:0042151	nematocyst	--	--	UP	1.56515	0.00229529	UP	4.12231	2.31e-13	UP	5.57627	4.13e-23	FALSE	0.821459	0.181316	UP	4.89214
	Cluster-11149.20320	2.38	13.85	15.89	1.14	0.39	1251	1276253080	PIN11382.1	1315	3e-142	Iron/ascorbate family oxidoreductase [Handroanthus impetiginosus]	XM_011099566.2	XM_011099566	438	0	PREDICTED: Sesamum indicum flavonol synthase/flavanone 3-hydroxylase (LOC105176681), mRNA	K05278	FLS	flavonol synthase	http://www.genome.jp/dbget-bin/www_bget?ko:K05278	Q07512	1177	1.1e-127	Flavonol synthase/flavanone 3-hydroxylase OS=Petunia hybrida OX=4102 GN=FL PE=2 SV=1	PF03171	2OG-Fe(II) oxygenase superfamily	GO:0055114	oxidation-reduction process	GO:0016491	oxidoreductase activity	--	--	--	--	UP	3.80148	7.55e-12	FALSE	1.15094	0.32785	UP	4.84034	8.5e-15	FALSE	1.72603	0.0111185	UP	2.82375
	Cluster-11149.10607	19.16	10.45	62.38	7.29	1.84	907	1276240750	PIN02149.1	826	1.1e-85	Cytochrome P450 CYP4/CYP19/CYP26 subfamily [Handroanthus impetiginosus]	CP046694.1	CP046694	37	2.81e-07	Solanum tuberosum cultivar MSH/14-112 chromosome 10	-	-	-	http://www.genome.jp/dbget-bin/www_bget?ko:-	U5NE19	522	7.4e-52	7-deoxyloganic acid hydroxylase OS=Catharanthus roseus OX=4058 GN=7DLH PE=1 SV=1	PF00067//PF07225	Cytochrome P450//NADH-ubiquinone oxidoreductase B15 subunit (NDUFB4)	GO:0006814//GO:0006744//GO:0006120//GO:0055114	sodium ion transport//ubiquinone biosynthetic process//mitochondrial electron transport, NADH to ubiquinone//oxidation-reduction process	GO:0005506//GO:0008137//GO:0020037//GO:0016705	iron ion binding//NADH dehydrogenase (ubiquinone) activity//heme binding//oxidoreductase activity, acting on paired donors, with incorporation or reduction of molecular oxygen	GO:0005739	mitochondrion	--	--	FALSE	0.728443	0.329193	FALSE	1.58451	0.0138192	UP	2.20196	8.71e-05	UP	2.06218	7.2e-05	UP	3.59553
	Cluster-11149.7590	1.81	1.57	3.14	2.4	0.13	1937	747056349	XP_011074435.1	2063	8.5e-229	abscisic acid 8'-hydroxylase 4-like [Sesamum indicum]	XM_011076133.2	XM_011076133	792	0	PREDICTED: Sesamum indicum abscisic acid 8'-hydroxylase 4-like (LOC105159170), mRNA	K09843	E1.14.13.93	(+)-abscisic acid 8'-hydroxylase	http://www.genome.jp/dbget-bin/www_bget?ko:K09843	A9QNE7	1759	5.8e-195	Abscisic acid 8'-hydroxylase CYP707A1 OS=Solanum lycopersicum OX=4081 GN=CYP707A1 PE=2 SV=1	PF00067	Cytochrome P450	GO:0055114	oxidation-reduction process	GO:0005506//GO:0020037//GO:0016705	iron ion binding//heme binding//oxidoreductase activity, acting on paired donors, with incorporation or reduction of molecular oxygen	--	--	--	--	FALSE	-0.413481	0.749853	UP	3.81006	5.7e-07	UP	3.28441	2.56e-05	FALSE	0.263861	0.910891	UP	4.01684
	Cluster-11149.14301	19.03	11.76	156.74	57.51	12.09	1858	1276250037	PIN09027.1	2045	1e-226	Cytochrome P450 CYP4/CYP19/CYP26 subfamily [Handroanthus impetiginosus]	--	--	--	--	--	-	-	-	http://www.genome.jp/dbget-bin/www_bget?ko:-	U5NE19	1125	1.8e-121	7-deoxyloganic acid hydroxylase OS=Catharanthus roseus OX=4058 GN=7DLH PE=1 SV=1	PF00067	Cytochrome P450	GO:0055114	oxidation-reduction process	GO:0005506//GO:0020037//GO:0016705	iron ion binding//heme binding//oxidoreductase activity, acting on paired donors, with incorporation or reduction of molecular oxygen	--	--	--	--	DOWN	-2.08729	2.18e-05	UP	1.85297	0.000190131	FALSE	-0.345056	0.63047	FALSE	-0.921031	0.110949	FALSE	0.881886
	Cluster-11149.19917	42.7	11.41	43.88	5	3.84	1315	848927613	XP_012827533.1	1221	2.5e-131	PREDICTED: fatty acid desaturase 4, chloroplastic-like [Erythranthe guttata]	XM_012972079.1	XM_012972079	362	0	PREDICTED: Erythranthe guttatus fatty acid desaturase 4, chloroplastic-like (LOC105948841), mRNA	K20417	FAD4	palmitoyl-[glycerolipid] 3-(E)-desaturase	http://www.genome.jp/dbget-bin/www_bget?ko:K20417	Q9SZ42	940	3.6e-100	Fatty acid desaturase 4, chloroplastic OS=Arabidopsis thaliana OX=3702 GN=FAD4 PE=1 SV=1	PF04116//PF01157	Fatty acid hydroxylase superfamily//Ribosomal protein L21e	GO:0008610//GO:0042254//GO:0055114//GO:0006412	lipid biosynthetic process//ribosome biogenesis//oxidation-reduction process//translation	GO:0003735//GO:0005506//GO:0016491	structural constituent of ribosome//iron ion binding//oxidoreductase activity	GO:0005840	ribosome	--	--	FALSE	1.39419	0.0135667	FALSE	-0.0172045	1	FALSE	1.26614	0.0175101	UP	3.76512	8.51e-14	UP	3.69764
	Cluster-11149.26879	14.43	30.84	25.18	8.67	2.21	622	747041406	XP_011072860.1	679	8.3e-69	cytochrome P450 86A22 [Sesamum indicum]	XM_011074558.2	XM_011074558	291	1.2e-148	PREDICTED: Sesamum indicum cytochrome P450 86A22 (LOC105157979), mRNA	K15398	CYP86A4S	fatty acid omega-hydroxylase	http://www.genome.jp/dbget-bin/www_bget?ko:K15398	B3RFJ6	621	1.7e-63	Cytochrome P450 86A22 OS=Petunia hybrida OX=4102 GN=CYP86A22 PE=1 SV=1	PF16839//PF00067	Nematode antimicrobial peptide//Cytochrome P450	GO:0098542//GO:0055114	defense response to other organism//oxidation-reduction process	GO:0005506//GO:0020037//GO:0016705	iron ion binding//heme binding//oxidoreductase activity, acting on paired donors, with incorporation or reduction of molecular oxygen	--	--	--	--	UP	2.0475	0.000134865	FALSE	1.56999	0.0305301	UP	3.50621	8.01e-10	FALSE	1.39533	0.0178074	UP	2.9137
	Cluster-11149.16474	0.6	4.42	2.85	2.05	0.3	394	1276259156	PIN16395.1	191	2e-12	Iron/ascorbate family oxidoreductase [Handroanthus impetiginosus]	XM_007030407.2	XM_007030407	44	1.49e-11	PREDICTED: Theobroma cacao 1-aminocyclopropane-1-carboxylate oxidase homolog 1 (LOC18600112), mRNA	-	-	-	http://www.genome.jp/dbget-bin/www_bget?ko:-	O04847	141	4.9e-08	Deacetoxyvindoline 4-hydroxylase OS=Catharanthus roseus OX=4058 GN=D4H PE=1 SV=2	--	--	--	--	--	--	--	--	--	--	FALSE	1.34649	0.320113	FALSE	2.26563	0.370591	FALSE	3.49365	0.0124267	FALSE	-1.09173	0.841577	FALSE	1.10484
	Cluster-11149.18283	4.13	4.29	4.17	1.62	0.47	2520	747047575	XP_011069763.1	839	9.4e-87	isoflavone 2'-hydroxylase-like [Sesamum indicum]	XM_021835945.1	XM_021835945	68	4.67e-24	PREDICTED: Hevea brasiliensis cytochrome P450 81E8-like (LOC110672985), mRNA	-	-	-	http://www.genome.jp/dbget-bin/www_bget?ko:-	W8JMU7	674	4.9e-69	Cytochrome P450 81Q32 OS=Catharanthus roseus OX=4058 GN=CYP81Q32 PE=2 SV=1	PF00067	Cytochrome P450	GO:0055114	oxidation-reduction process	GO:0016705//GO:0005506//GO:0020037	oxidoreductase activity, acting on paired donors, with incorporation or reduction of molecular oxygen//iron ion binding//heme binding	--	--	--	--	UP	1.60735	0.00398713	FALSE	1.37067	0.0520424	UP	2.86689	2.31e-07	UP	2.02883	0.000146107	UP	3.34824
	Cluster-11149.27919	56.97	22.88	166.75	37.18	18.8	1955	747102147	XP_011099226.1	1200	1e-128	geraniol 8-hydroxylase-like [Sesamum indicum]	XM_011100924.2	XM_011100924	426	0	PREDICTED: Sesamum indicum geraniol 8-hydroxylase-like (LOC105177688), mRNA	-	-	-	http://www.genome.jp/dbget-bin/www_bget?ko:-	Q8VWZ7	1085	8.3e-117	geraniol 8-hydroxylase OS=Catharanthus roseus OX=4058 GN=CYP76B6 PE=1 SV=1	PF00067	Cytochrome P450	GO:0055114	oxidation-reduction process	GO:0016705//GO:0005506//GO:0020037	oxidoreductase activity, acting on paired donors, with incorporation or reduction of molecular oxygen//iron ion binding//heme binding	--	--	--	--	FALSE	-0.498502	0.550344	FALSE	0.587815	0.387654	FALSE	-0.0214528	1	FALSE	1.28983	0.0136764	UP	1.82761
	Cluster-11149.7784	0.31	2.03	2.49	1.3	0.31	1222	747091011	XP_011093218.1	1379	1.1e-149	methylsterol monooxygenase 1-1 [Sesamum indicum]	XM_011094916.2	XM_011094916	489	0	PREDICTED: Sesamum indicum methylsterol monooxygenase 1-1 (LOC105173233), mRNA	-	-	-	http://www.genome.jp/dbget-bin/www_bget?ko:-	Q8L7W5	1105	2.5e-119	Methylsterol monooxygenase 1-1 OS=Arabidopsis thaliana OX=3702 GN=SMO1-1 PE=1 SV=1	PF04116//PF03083//PF09329	Fatty acid hydroxylase superfamily//Sugar efflux transporter for intercellular exchange//Primase zinc finger	GO:0008610//GO:0055114//GO:0006260	lipid biosynthetic process//oxidation-reduction process//DNA replication	GO:0016491//GO:0005506	oxidoreductase activity//iron ion binding	GO:0005634//GO:0016021	nucleus//integral component of membrane	KOG0873	C-4 sterol methyl oxidase	FALSE	0.836983	0.371448	FALSE	1.65993	0.0875166	UP	2.38522	0.00239903	FALSE	-1.40796	0.187449	FALSE	0.201044
	Cluster-11149.29079	20.91	26.23	25.4	11.9	3.79	1771	1279029765	XP_022854208.1	2146	1.8e-238	protein LUTEIN DEFICIENT 5, chloroplastic-like [Olea europaea var. sylvestris]	XM_011078786.2	XM_011078786	1038	0	PREDICTED: Sesamum indicum protein LUTEIN DEFICIENT 5, chloroplastic (LOC105161176), mRNA	K15747	LUT5, CYP97A3	beta-ring hydroxylase	http://www.genome.jp/dbget-bin/www_bget?ko:K15747	Q93VK5	2028	3.4e-226	Protein LUTEIN DEFICIENT 5, chloroplastic OS=Arabidopsis thaliana OX=3702 GN=CYP97A3 PE=1 SV=1	PF00067	Cytochrome P450	GO:0055114	oxidation-reduction process	GO:0005506//GO:0020037//GO:0016705	iron ion binding//heme binding//oxidoreductase activity, acting on paired donors, with incorporation or reduction of molecular oxygen	--	--	KOG0157	Cytochrome P450 CYP4/CYP19/CYP26 subfamilies	FALSE	1.34217	0.0120612	FALSE	1.25343	0.0249151	UP	2.48475	3.32e-07	UP	1.48679	0.00407161	UP	2.68999
	Cluster-11149.34845	2.85	5.72	6.44	3.62	1.22	4417	848909383	XP_012853479.1	1257	5.6e-135	PREDICTED: uncharacterized protein LOC105973031 [Erythranthe guttata]	XM_011080340.2	XM_011080340	373	0	PREDICTED: Sesamum indicum cytochrome P450 CYP736A12-like (LOC105162333), mRNA	K20562	CYP736A	biphenyl-4-hydroxylase	http://www.genome.jp/dbget-bin/www_bget?ko:K20562	A0A068Q5V6	816	2.9e-85	Cytochrome P450 71AU50 OS=Prunus mume OX=102107 GN=CYP71AU50 PE=2 SV=1	PF00067//PF12179//PF02536//PF08465	Cytochrome P450//I-kappa-kinase-beta NEMO binding domain//mTERF//Thymidine kinase from Herpesvirus C-terminal	GO:0009069//GO:0016310//GO:0006355//GO:0006230//GO:0055114//GO:0006206	serine family amino acid metabolic process//phosphorylation//regulation of transcription, DNA-templated//TMP biosynthetic process//oxidation-reduction process//pyrimidine nucleobase metabolic process	GO:0004797//GO:0003690//GO:0005506//GO:0005524//GO:0016705//GO:0008384//GO:0020037	thymidine kinase activity//double-stranded DNA binding//iron ion binding//ATP binding//oxidoreductase activity, acting on paired donors, with incorporation or reduction of molecular oxygen//IkappaB kinase activity//heme binding	GO:0008385	IkappaB kinase complex	--	--	FALSE	0.859332	0.166777	FALSE	1.1758	0.0391892	UP	1.9243	0.000104179	FALSE	0.329769	0.806498	FALSE	1.45537
	Cluster-11149.29213	9.01	11.4	43.42	21.34	9.46	1946	1276242097	PIN03103.1	1941	1.2e-214	Cytochrome P450 CYP2 subfamily [Handroanthus impetiginosus]	AB234901.1	AB234901	608	0	Verbena x hybrida mRNA for flavonoid 3'-hydroxylase, partial cds, cultivar: Tapien Pink	K05280	E1.14.13.21	flavonoid 3'-monooxygenase	http://www.genome.jp/dbget-bin/www_bget?ko:K05280	Q9SBQ9	1699	5.2e-188	Flavonoid 3'-monooxygenase OS=Petunia hybrida OX=4102 GN=CYP75B2 PE=2 SV=1	PF00067	Cytochrome P450	GO:0055114	oxidation-reduction process	GO:0016705//GO:0020037//GO:0005506	oxidoreductase activity, acting on paired donors, with incorporation or reduction of molecular oxygen//heme binding//iron ion binding	--	--	--	--	FALSE	-0.702703	0.294901	FALSE	0.776982	0.214075	FALSE	-0.0364658	1	FALSE	-0.569569	0.429725	FALSE	0.157398
	Cluster-11149.33593	8.01	16.7	11.91	2.97	2.73	2534	848887022	XP_012843752.1	2503	1.1e-279	PREDICTED: cytochrome P450 86A8-like [Erythranthe guttata]	XM_011094280.2	XM_011094280	925	0	PREDICTED: Sesamum indicum cytochrome P450 86A8-like (LOC105172724), mRNA	K15398	CYP86A4S	fatty acid omega-hydroxylase	http://www.genome.jp/dbget-bin/www_bget?ko:K15398	O80823	2237	2.8e-250	Cytochrome P450 86A8 OS=Arabidopsis thaliana OX=3702 GN=CYP86A8 PE=2 SV=1	PF00067	Cytochrome P450	GO:0055114	oxidation-reduction process	GO:0016705//GO:0005506//GO:0020037	oxidoreductase activity, acting on paired donors, with incorporation or reduction of molecular oxygen//iron ion binding//heme binding	--	--	--	--	UP	2.69018	5.74e-08	FALSE	-0.273419	0.838017	UP	2.30589	2.11e-06	UP	2.10553	3.34e-05	UP	1.782
	Cluster-11149.18291	12.19	33.65	33.05	25.01	13.94	1057	604322303	EYU32689.1	486	3.4e-46	hypothetical protein MIMGU_mgv1a014051mg [Erythranthe guttata]	XM_011103250.2	XM_011103250	274	5.87e-139	PREDICTED: Sesamum indicum caldesmon (LOC105179606), mRNA	-	-	-	http://www.genome.jp/dbget-bin/www_bget?ko:-	--	--	--	--	PF05279//PF14943	Aspartyl beta-hydroxylase N-terminal region//Mitochondrial ribosome subunit S26	--	--	--	--	GO:0005763//GO:0016020	mitochondrial small ribosomal subunit//membrane	--	--	FALSE	0.635044	0.380656	FALSE	0.445135	0.596398	FALSE	0.969392	0.0650643	FALSE	-0.366677	0.745764	FALSE	0.0284565
	Cluster-11149.9934	3.77	3.47	4.12	1.98	1.83	2481	848869133	XP_012835193.1	402	4.4e-36	PREDICTED: UBX domain-containing protein 1 isoform X2 [Erythranthe guttata]	XM_011026342.1	XM_011026342	73	7.64e-27	PREDICTED: Populus euphratica UBX domain-containing protein 1-like (LOC105125759), mRNA	-	-	-	http://www.genome.jp/dbget-bin/www_bget?ko:-	--	--	--	--	PF05279//PF03839	Aspartyl beta-hydroxylase N-terminal region//Translocation protein Sec62	GO:0015031	protein transport	--	--	GO:0030176//GO:0016020	integral component of endoplasmic reticulum membrane//membrane	KOG2699	Predicted ubiquitin regulatory protein	FALSE	1.00951	0.114116	FALSE	-0.282246	0.835751	FALSE	0.616472	0.342721	UP	1.60091	0.00366275	FALSE	1.26854
Epoxidase	Cluster-11149.21143	53.04	64.43	70.67	6.5	1.26	1860	747061238	XP_011077080.1	1983	1.5e-219	violaxanthin de-epoxidase, chloroplastic [Sesamum indicum]	XM_011078778.2	XM_011078778	899	0	PREDICTED: Sesamum indicum violaxanthin de-epoxidase, chloroplastic (LOC105161169), mRNA	K09839	VDE, NPQ1	violaxanthin de-epoxidase	http://www.genome.jp/dbget-bin/www_bget?ko:K09839	Q40593	1544	4.7e-170	Violaxanthin de-epoxidase, chloroplastic OS=Nicotiana tabacum OX=4097 GN=VDE1 PE=2 SV=1	PF07137	VDE lipocalin domain	GO:0055114	oxidation-reduction process	GO:0046422	violaxanthin de-epoxidase activity	GO:0009507	chloroplast	--	--	UP	3.51111	1.09e-12	UP	1.97252	0.000368509	UP	5.37262	1.58e-23	UP	3.70226	7.67e-14	UP	5.62401
	Cluster-11149.12635	4.9	8.03	5.83	5.47	2.05	1994	747103757	XP_011100080.1	2087	1.4e-231	violaxanthin de-epoxidase, chloroplastic [Sesamum indicum]	XM_011101778.2	XM_011101778	763	0	PREDICTED: Sesamum indicum violaxanthin de-epoxidase, chloroplastic (LOC105178316), mRNA	-	-	-	http://www.genome.jp/dbget-bin/www_bget?ko:-	Q40593	183	3.3e-12	Violaxanthin de-epoxidase, chloroplastic OS=Nicotiana tabacum OX=4097 GN=VDE1 PE=2 SV=1	PF04706//PF07137//PF11965	Dickkopf N-terminal cysteine-rich region//VDE lipocalin domain//Domain of unknown function (DUF3479)	GO:0055114//GO:0015994//GO:0030178//GO:0007275	oxidation-reduction process//chlorophyll metabolic process//negative regulation of Wnt signaling pathway//multicellular organism development	GO:0046422//GO:0016851	violaxanthin de-epoxidase activity//magnesium chelatase activity	GO:0010007//GO:0005576//GO:0009507	magnesium chelatase complex//extracellular region//chloroplast	--	--	FALSE	0.756259	0.262912	FALSE	1.01955	0.101433	UP	1.66497	0.00133884	FALSE	0.517022	0.541474	FALSE	1.4863
	Cluster-11149.41811	10.3	5.28	2.28	0.75	0.19	925	747064054	XP_011078595.1	624	3e-62	temperature-induced lipocalin-1 [Sesamum indicum]	XM_012983987.1	XM_012983987	39	2.21e-08	PREDICTED: Erythranthe guttatus nuclear transcription factor Y subunit B-3-like (LOC105959828), mRNA	K03098	APOD	apolipoprotein D and lipocalin family protein	http://www.genome.jp/dbget-bin/www_bget?ko:K03098	Q9FGT8	576	4.1e-58	Temperature-induced lipocalin-1 OS=Arabidopsis thaliana OX=3702 GN=TIL PE=1 SV=1	PF04983//PF07137	RNA polymerase Rpb1, domain 3//VDE lipocalin domain	GO:0006144//GO:0055114//GO:0006351//GO:0006206	purine nucleobase metabolic process//oxidation-reduction process//transcription, DNA-templated//pyrimidine nucleobase metabolic process	GO:0003899//GO:0046422//GO:0003677	DNA-directed 5'-3' RNA polymerase activity//violaxanthin de-epoxidase activity//DNA binding	GO:0009507//GO:0005730	chloroplast//nucleolus	--	--	UP	3.00451	8.6e-06	FALSE	1.54204	0.408662	UP	4.43233	5.7e-08	UP	4.42552	7.57e-13	UP	5.90645
	Cluster-11149.25800	13.39	24.17	29.63	24.76	4.84	2312	443540471	AGC94919.1	2166	1.2e-240	putative squaline epoxidase [Withania somnifera]	XM_011080168.2	XM_011080168	986	0	PREDICTED: Sesamum indicum squalene monooxygenase (LOC105162196), mRNA	K00511	SQLE, ERG1	squalene monooxygenase	http://www.genome.jp/dbget-bin/www_bget?ko:K00511	O48651	2075	1.6e-231	Squalene monooxygenase SE1 OS=Panax ginseng OX=4054 GN=SQE1 PE=2 SV=1	PF02254//PF01266//PF08491//PF01494//PF07992//PF01210	TrkA-N domain//FAD dependent oxidoreductase//Squalene epoxidase//FAD binding domain//Pyridine nucleotide-disulphide oxidoreductase//NAD-dependent glycerol-3-phosphate dehydrogenase N-terminus	GO:0006813//GO:0055114//GO:0016114//GO:0046168//GO:0006694	potassium ion transport//oxidation-reduction process//terpenoid biosynthetic process//glycerol-3-phosphate catabolic process//steroid biosynthetic process	GO:0016616//GO:0051287//GO:0016491//GO:0004506//GO:0050660//GO:0071949	oxidoreductase activity, acting on the CH-OH group of donors, NAD or NADP as acceptor//NAD binding//oxidoreductase activity//squalene monooxygenase activity//flavin adenine dinucleotide binding//FAD binding	GO:0016021	integral component of membrane	KOG1298	Squalene monooxygenase	FALSE	0.166567	1	UP	1.95886	9.05e-05	UP	2.01462	2.92e-05	FALSE	-0.21173	0.924197	UP	1.69701
	Cluster-11149.14717	3.36	7.13	7.16	5.35	2.93	4077	747059021	XP_011075870.1	900	1.3e-93	stomatin-like protein 2, mitochondrial [Sesamum indicum]	XM_011077568.2	XM_011077568	379	0	PREDICTED: Sesamum indicum stomatin-like protein 2, mitochondrial (LOC105160259), transcript variant X2, mRNA	-	-	-	http://www.genome.jp/dbget-bin/www_bget?ko:-	Q4FZT0	397	1e-36	Stomatin-like protein 2, mitochondrial OS=Rattus norvegicus OX=10116 GN=Stoml2 PE=1 SV=1	PF08491//PF04838//PF06072	Squalene epoxidase//Baculoviridae late expression factor 5//Alphaherpesvirus tegument protein US9	GO:0055114//GO:0016114//GO:0006355//GO:0075733//GO:0006694	oxidation-reduction process//terpenoid biosynthetic process//regulation of transcription, DNA-templated//intracellular transport of virus//steroid biosynthetic process	GO:0004506//GO:0050660	squalene monooxygenase activity//flavin adenine dinucleotide binding	GO:0016021	integral component of membrane	KOG2620	Prohibitins and stomatins of the PID superfamily	FALSE	0.613509	0.392736	FALSE	0.474697	0.544514	FALSE	0.977419	0.0631817	FALSE	0.00380988	1	FALSE	0.428474
	Cluster-11149.19791	21.78	10.61	18.27	2.36	2.25	3248	1276247851	PIN07344.1	800	4.1e-82	Kynurenine 3-monooxygenase [Handroanthus impetiginosus]	XM_023011234.1	XM_023011234	181	9.22e-87	PREDICTED: Olea europaea var. sylvestris monooxygenase 2-like (LOC111386764), transcript variant X2, mRNA	-	-	-	http://www.genome.jp/dbget-bin/www_bget?ko:-	O81816	237	3e-18	Monooxygenase 2 OS=Arabidopsis thaliana OX=3702 GN=MO2 PE=2 SV=1	PF01266//PF00870//PF01494//PF08491//PF02366//PF07992	FAD dependent oxidoreductase//P53 DNA-binding domain//FAD binding domain//Squalene epoxidase//Dolichyl-phosphate-mannose-protein mannosyltransferase//Pyridine nucleotide-disulphide oxidoreductase	GO:0006694//GO:0055114//GO:0006493//GO:0016114	steroid biosynthetic process//oxidation-reduction process//protein O-linked glycosylation//terpenoid biosynthetic process	GO:0004506//GO:0071949//GO:0050660//GO:0000030//GO:0016491	squalene monooxygenase activity//FAD binding//flavin adenine dinucleotide binding//mannosyltransferase activity//oxidoreductase activity	GO:0000136//GO:0016020//GO:0016021	alpha-1,6-mannosyltransferase complex//membrane//integral component of membrane	--	--	UP	2.36562	2.17e-06	FALSE	-0.325502	0.789051	UP	1.92926	8.1e-05	UP	3.87944	1.01e-14	UP	3.50379
	Cluster-11149.34854	24.35	21.24	92.59	16.6	13.07	1025	927976464	ALE33755.1	724	8.3e-74	zeaxanthin epoxidase 1 [Erythranthe lewisii]	XM_020699254.1	XM_020699254	301	5.58e-154	PREDICTED: Sesamum indicum zeaxanthin epoxidase, chloroplastic (LOC105177618), mRNA	K09838	ZEP, ABA1	zeaxanthin epoxidase	http://www.genome.jp/dbget-bin/www_bget?ko:K09838	Q40412	579	2.1e-58	Zeaxanthin epoxidase, chloroplastic OS=Nicotiana plumbaginifolia OX=4092 GN=ABA2 PE=1 SV=1	PF00498	FHA domain	--	--	GO:0005515	protein binding	--	--	--	--	FALSE	0.562668	0.471198	FALSE	-0.0532131	1	FALSE	0.398687	0.553586	FALSE	1.2221	0.0259259	FALSE	1.11883
	Cluster-11149.28315	30.92	23.37	114.19	19.23	13.85	2169	927976464	ALE33755.1	1757	2.9e-193	zeaxanthin epoxidase 1 [Erythranthe lewisii]	XM_023007437.1	XM_023007437	549	0	PREDICTED: Olea europaea var. sylvestris zeaxanthin epoxidase, chloroplastic (LOC111383342), mRNA	-	-	-	http://www.genome.jp/dbget-bin/www_bget?ko:-	P93236	1557	1.7e-171	Zeaxanthin epoxidase, chloroplastic OS=Solanum lycopersicum OX=4081 PE=2 SV=1	PF01494//PF01266//PF07992	FAD binding domain//FAD dependent oxidoreductase//Pyridine nucleotide-disulphide oxidoreductase	GO:0055114	oxidation-reduction process	GO:0016491//GO:0071949	oxidoreductase activity//FAD binding	--	--	--	--	FALSE	0.483067	0.566119	FALSE	0.0771963	1	FALSE	0.449486	0.466169	FALSE	1.36011	0.00906275	UP	1.38727
	Cluster-11149.34853	1.4	1.8	6.66	1.18	0	466	1173779086	XP_020554913.1	138	3.4e-06	LOW QUALITY PROTEIN: zeaxanthin epoxidase, chloroplastic [Sesamum indicum]	KC542187.1	KC542187	38	3.87e-08	Boschniakia himalaica phytochrome A (phyA) gene, partial cds	--	--	--	--	Q40412	123	7e-06	Zeaxanthin epoxidase, chloroplastic OS=Nicotiana plumbaginifolia OX=4092 GN=ABA2 PE=1 SV=1	--	--	--	--	--	--	--	--	--	--	FALSE	0.834538	0.711943	FALSE	5.42225	0.233202	FALSE	6.06229	0.0376684	FALSE	0.884812	0.806498	FALSE	5.93704
	Cluster-11149.13848	11.22	9.6	22.31	1.13	0.58	1961	1276269219	PIN24920.1	343	2.4e-29	Zeaxanthin epoxidase [Handroanthus impetiginosus]	XM_010245432.2	XM_010245432	54	2.2e-16	PREDICTED: Nelumbo nucifera zeaxanthin epoxidase, chloroplastic (LOC104587718), transcript variant X3, mRNA	-	-	-	http://www.genome.jp/dbget-bin/www_bget?ko:-	--	--	--	--	--	--	--	--	--	--	--	--	--	--	UP	3.27955	5.41e-10	FALSE	0.573158	0.639741	UP	3.74139	1.17e-11	UP	3.97617	8.69e-14	UP	4.49802
[truncated: 14 more columns]
