# Supplementary material for: Transcriptome Analysis Provides Insights into Catalpol Biosynthesis in the Medicinal Plant Rehmannia glutinosa and the Functional Characterization of RgGES Genes
Source: Genes (Basel). 2024 Jan 24;15(2):155. doi: 10.3390/genes15020155 (PMC10888080; doi:10.3390/genes15020155)
Supplement: Supplementary file 1 [file genes-15-00155-s001.zip › Supplementay Table S10.xlsx]

## Sheet: Sheet1
Supplementay Table S10. NADP oxidoreductase candidate genes in R. glutinosa transcriptomes. The sequences which met the gene screening criteria were marked in red color.
gene_id	Fpkm(HFL)	Fpkm(BJL)	Fpkm(J9L)	Fpkm(J9R)	Fpkm(J9AR)	Gene Length	NR GI	NR ID	NR Score	NR Evalue	NR Description	NT GI	NT ID	NT Score	NT Evalue	NT Description	KO ID	KO Name	KO Description	Http Link	Swissprot ID	Swissprot Score	Swissprot Evalue	Swissprot Description	PFAM ID	PFAM description	Gene Ontology Biological Pathway	BP Description	Gene Ontology Molecular Function	MF Description	Gene Ontology Cellular Component	CC Description	KOG ID	KOG Description	UP_DOWN_REGULATION(BJ_LvsJ9_R)	log2FC(BJ_LvsJ9_R)	q value(BJ_LvsJ9_R)	UP_DOWN_REGULATION(J9_RvsJ9_X)	log2FC(J9_RvsJ9_X)	q value(J9_RvsJ9_X)	UP_DOWN_REGULATION(BJ_LvsJ9_X)	log2FC(BJ_LvsJ9_X)	q value(BJ_LvsJ9_X)	UP_DOWN_REGULATION(HF_LvsJ9_R)	log2FC(HF_LvsJ9_R)	q value(HF_LvsJ9_R)	UP_DOWN_REGULATION(HF_LvsJ9_X)	log2FC(HF_LvsJ9_X)	q value(HF_LvsJ9_X)
Cluster-11149.24800	114.26	69.55	213.74	0.09	0.02	2045	158712040	ABW79813.1	812	1e-83	malate dehydrogenase [Perilla frutescens]	XM_011089712.2	XM_011089712	298	5.26e-152	PREDICTED: Sesamum indicum malate dehydrogenase, glyoxysomal-like (LOC105169330), mRNA	K00026	MDH2	malate dehydrogenase	http://www.genome.jp/dbget-bin/www_bget?ko:K00026	Q42972	770	2.9e-80	Malate dehydrogenase, glyoxysomal OS=Oryza sativa subsp. japonica OX=39947 GN=Os12g0632700 PE=1 SV=3	PF00056//PF02866	lactate/malate dehydrogenase, NAD binding domain//lactate/malate dehydrogenase, alpha/beta C-terminal domain	GO:0055114	oxidation-reduction process	GO:0016491//GO:0016616	oxidoreductase activity//oxidoreductase activity, acting on the CH-OH group of donors, NAD or NADP as acceptor	--	--	KOG1494	NAD-dependent malate dehydrogenase	UP	9.72011	1.91e-42	FALSE	1.44456	0.909352	UP	11.043	1.08e-41	UP	10.903	1.42e-50	UP	12.2664	5.26e-50
Cluster-11149.24375	315.92	224.22	639.6	0.22	0.1	1596	1024029385	KZV40842.1	733	1.2e-74	glyceraldehyde-3-phosphate dehydrogenase B, chloroplastic-like [Dorcoceras hygrometricum]	XM_023004462.1	XM_023004462	282	3.2e-143	PREDICTED: Olea europaea var. sylvestris glyceraldehyde-3-phosphate dehydrogenase B, chloroplastic (LOC111380808), mRNA	K05298	GAPA	glyceraldehyde-3-phosphate dehydrogenase (NADP+) (phosphorylating)	http://www.genome.jp/dbget-bin/www_bget?ko:K05298	P12859	699	3.9e-72	Glyceraldehyde-3-phosphate dehydrogenase B, chloroplastic OS=Pisum sativum OX=3888 GN=GAPB PE=1 SV=2	PF02800	Glyceraldehyde 3-phosphate dehydrogenase, C-terminal domain	GO:0055114	oxidation-reduction process	GO:0016620	oxidoreductase activity, acting on the aldehyde or oxo group of donors, NAD or NADP as acceptor	--	--	KOG0657	Glyceraldehyde 3-phosphate dehydrogenase	UP	10.1717	2.29e-49	FALSE	0.781187	1	UP	10.8376	5.71e-49	UP	11.133	1.78e-56	UP	11.8538	1.89e-56
Cluster-11149.26315	107.11	200.52	432.84	2.85	0.5	593	508782101	EOY29357.1	195	1.1e-12	NADP-dependent glyceraldehyde-3-phosphate dehydrogenase isoform 2 [Theobroma cacao]	XM_023032381.1	XM_023032381	83	4.82e-33	PREDICTED: Olea europaea var. sylvestris NADP-dependent glyceraldehyde-3-phosphate dehydrogenase (LOC111403760), mRNA	K00131	gapN	glyceraldehyde-3-phosphate dehydrogenase (NADP+)	http://www.genome.jp/dbget-bin/www_bget?ko:K00131	P93338	189	2e-13	NADP-dependent glyceraldehyde-3-phosphate dehydrogenase OS=Nicotiana plumbaginifolia OX=4092 GN=GAPN PE=2 SV=1	PF00171	Aldehyde dehydrogenase family	GO:0055114	oxidation-reduction process	GO:0016491	oxidoreductase activity	--	--	--	--	UP	6.35	5.87e-28	FALSE	2.06988	0.0775526	UP	8.30761	3.12e-33	UP	5.88615	2.35e-24	UP	7.89722	3.13e-30
Cluster-11149.27253	403.05	338.67	787.43	6.67	1.65	1837	747074042	XP_011084003.1	1490	2.2e-162	NADP-dependent glyceraldehyde-3-phosphate dehydrogenase [Sesamum indicum]	XM_011085701.2	XM_011085701	612	0	PREDICTED: Sesamum indicum NADP-dependent glyceraldehyde-3-phosphate dehydrogenase (LOC105166364), mRNA	K00131	gapN	glyceraldehyde-3-phosphate dehydrogenase (NADP+)	http://www.genome.jp/dbget-bin/www_bget?ko:K00131	P93338	1429	1e-156	NADP-dependent glyceraldehyde-3-phosphate dehydrogenase OS=Nicotiana plumbaginifolia OX=4092 GN=GAPN PE=2 SV=1	PF00171	Aldehyde dehydrogenase family	GO:0055114	oxidation-reduction process	GO:0016491	oxidoreductase activity	--	--	KOG2450	Aldehyde dehydrogenase	UP	5.86702	2.9e-28	UP	1.61446	0.00408113	UP	7.3705	9.69e-38	UP	6.5898	2.62e-33	UP	8.15367	2.93e-43
Cluster-11149.26970	215.47	136.54	333.89	1.9	0.85	2179	747090554	XP_011092968.1	1369	2.9e-148	glycerate dehydrogenase HPR, peroxisomal [Sesamum indicum]	XM_011094666.2	XM_011094666	584	0	PREDICTED: Sesamum indicum glycerate dehydrogenase HPR, peroxisomal (LOC105173028), mRNA	K15893	HPR1	hydroxypyruvate reductase 1	http://www.genome.jp/dbget-bin/www_bget?ko:K15893	Q9C9W5	1307	1.7e-142	Glycerate dehydrogenase HPR, peroxisomal OS=Arabidopsis thaliana OX=3702 GN=HPR PE=1 SV=1	PF02826//PF01269//PF02737//PF00389	D-isomer specific 2-hydroxyacid dehydrogenase, NAD binding domain//Fibrillarin//3-hydroxyacyl-CoA dehydrogenase, NAD binding domain//D-isomer specific 2-hydroxyacid dehydrogenase, catalytic domain	GO:0018874//GO:0006631//GO:0006574//GO:0006633//GO:0006550//GO:0006552//GO:0006568//GO:0006554//GO:0006364//GO:0055114	benzoate metabolic process//fatty acid metabolic process//valine catabolic process//fatty acid biosynthetic process//isoleucine catabolic process//leucine catabolic process//tryptophan metabolic process//lysine catabolic process//rRNA processing//oxidation-reduction process	GO:0003857//GO:0008168//GO:0016491//GO:0016616//GO:0003723//GO:0051287	3-hydroxyacyl-CoA dehydrogenase activity//methyltransferase activity//oxidoreductase activity//oxidoreductase activity, acting on the CH-OH group of donors, NAD or NADP as acceptor//RNA binding//NAD binding	--	--	KOG0068	D-3-phosphoglycerate dehydrogenase, D-isomer-specific 2-hydroxy acid dehydrogenase superfamily	UP	6.36503	7.62e-31	FALSE	0.768695	0.357601	UP	7.02258	1.75e-34	UP	7.49628	7.07e-39	UP	8.21412	1.23e-42
Cluster-11149.25786	408.02	354.74	722.85	14.54	3.64	2130	1279002385	XP_022861505.1	1165	1.3e-124	ferredoxin--NADP reductase, leaf-type isozyme, chloroplastic isoform X2 [Olea europaea var. sylvestris]	XM_011101548.2	XM_011101548	517	0	PREDICTED: Sesamum indicum ferredoxin--NADP reductase, leaf-type isozyme, chloroplastic (LOC105178160), mRNA	K02641	petH	ferredoxin--NADP+ reductase	http://www.genome.jp/dbget-bin/www_bget?ko:K02641	O04977	1141	2.9e-123	Ferredoxin--NADP reductase, leaf-type isozyme, chloroplastic OS=Nicotiana tabacum OX=4097 GN=PETH PE=2 SV=1	PF00667//PF01555//PF03688//PF00175	FAD binding domain//DNA methylase//Nepovirus coat protein, C-terminal domain//oxidoreductase NAD-binding domain	GO:0006306//GO:0055114	DNA methylation//oxidation-reduction process	GO:0008170//GO:0003677//GO:0016491	N-methyltransferase activity//DNA binding//oxidoreductase activity	GO:0019028	viral capsid	KOG1158	NADP/FAD dependent oxidoreductase	UP	4.81044	2.63e-21	UP	1.60167	0.00222695	UP	6.30125	2.38e-31	UP	5.48543	6.87e-26	UP	7.03687	2.34e-36
Cluster-11149.24972	380.43	246.51	773.19	0.08	0	1336	1600695993	TEY77787.1	1091	3e-116	glyceraldehyde-3-phosphate dehydrogenase (NADP+) (phosphorylating) [Salvia splendens]	XM_011075770.2	XM_011075770	404	0	PREDICTED: Sesamum indicum glyceraldehyde-3-phosphate dehydrogenase B, chloroplastic (LOC105158872), mRNA	-	-	-	http://www.genome.jp/dbget-bin/www_bget?ko:-	P12859	999	5.3e-107	Glyceraldehyde-3-phosphate dehydrogenase B, chloroplastic OS=Pisum sativum OX=3888 GN=GAPB PE=1 SV=2	PF02826//PF00044	D-isomer specific 2-hydroxyacid dehydrogenase, NAD binding domain//Glyceraldehyde 3-phosphate dehydrogenase, NAD binding domain	GO:0055114	oxidation-reduction process	GO:0016620//GO:0051287	oxidoreductase activity, acting on the aldehyde or oxo group of donors, NAD or NADP as acceptor//NAD binding	--	--	--	--	UP	11.7388	2.24e-52	FALSE	3.90305	0.796404	UP	15.4407	1.38e-50	UP	12.8209	2.16e-60	UP	16.3545	1.34e-58
Cluster-11149.24307	174.62	206.19	356.29	10.94	5.78	3100	1276242728	PIN03565.1	1674	1.7e-183	Glutamyl-tRNA reductase [Handroanthus impetiginosus]	XM_011075990.2	XM_011075990	635	0	PREDICTED: Sesamum indicum glutamyl-tRNA reductase 1, chloroplastic (LOC105159056), mRNA	K02492	hemA	glutamyl-tRNA reductase	http://www.genome.jp/dbget-bin/www_bget?ko:K02492	P93111	1585	1.4e-174	Glutamyl-tRNA reductase 1, chloroplastic OS=Cucumis sativus OX=3659 GN=HEMA1 PE=2 SV=1	PF00899//PF01113//PF02254//PF05201//PF02737//PF03721//PF02826//PF03435//PF00044//PF03446//PF00745	ThiF family//Dihydrodipicolinate reductase, N-terminus//TrkA-N domain//Glutamyl-tRNAGlu reductase, N-terminal domain//3-hydroxyacyl-CoA dehydrogenase, NAD binding domain//UDP-glucose/GDP-mannose dehydrogenase family, NAD binding domain//D-isomer specific 2-hydroxyacid dehydrogenase, NAD binding domain//Saccharopine dehydrogenase NADP binding domain//Glyceraldehyde 3-phosphate dehydrogenase, NAD b…	GO:0006568//GO:0006552//GO:0006550//GO:0033014//GO:0006633//GO:0006813//GO:0055114//GO:0006554//GO:0009089//GO:0018874//GO:0006631//GO:0009085//GO:0006574	tryptophan metabolic process//leucine catabolic process//isoleucine catabolic process//tetrapyrrole biosynthetic process//fatty acid biosynthetic process//potassium ion transport//oxidation-reduction process//lysine catabolic process//lysine biosynthetic process via diaminopimelate//benzoate metabolic process//fatty acid metabolic process//lysine biosynthetic process//valine catabolic process	GO:0008641//GO:0016620//GO:0051287//GO:0008883//GO:0050661//GO:0003857//GO:0008839//GO:0016616//GO:0016491	ubiquitin-like modifier activating enzyme activity//oxidoreductase activity, acting on the aldehyde or oxo group of donors, NAD or NADP as acceptor//NAD binding//glutamyl-tRNA reductase activity//NADP binding//3-hydroxyacyl-CoA dehydrogenase activity//4-hydroxy-tetrahydrodipicolinate reductase//oxidoreductase activity, acting on the CH-OH group of donors, NAD or NADP as acceptor//oxidoreductase a…	--	--	--	--	UP	4.43605	7.71e-19	FALSE	0.525605	0.485866	UP	4.85083	8.43e-22	UP	4.67195	2.22e-20	UP	5.14747	1.11e-23
Cluster-11149.32307	57.81	69.39	122.35	23.6	2.14	1114	747097173	XP_011096539.1	1154	1.2e-123	uncharacterized protein At2g34460, chloroplastic [Sesamum indicum]	XM_012986757.1	XM_012986757	445	0	PREDICTED: Erythranthe guttatus uncharacterized protein At2g34460, chloroplastic (LOC105962454), mRNA	-	-	-	http://www.genome.jp/dbget-bin/www_bget?ko:-	Q8H124	968	1.7e-103	Uncharacterized protein At2g34460, chloroplastic OS=Arabidopsis thaliana OX=3702 GN=At2g34460 PE=1 SV=1	PF03435//PF02254//PF01370//PF01113//PF01073//PF00056	Saccharopine dehydrogenase NADP binding domain//TrkA-N domain//NAD dependent epimerase/dehydratase family//Dihydrodipicolinate reductase, N-terminus//3-beta hydroxysteroid dehydrogenase/isomerase family//lactate/malate dehydrogenase, NAD binding domain	GO:0009089//GO:0008209//GO:0008210//GO:0006694//GO:0006813//GO:0008207//GO:0055114//GO:0009085	lysine biosynthetic process via diaminopimelate//androgen metabolic process//estrogen metabolic process//steroid biosynthetic process//potassium ion transport//C21-steroid hormone metabolic process//oxidation-reduction process//lysine biosynthetic process	GO:0050662//GO:0003824//GO:0008839//GO:0016616//GO:0016491//GO:0003854	obsolete coenzyme binding//catalytic activity//4-hydroxy-tetrahydrodipicolinate reductase//oxidoreductase activity, acting on the CH-OH group of donors, NAD or NADP as acceptor//oxidoreductase activity//3-beta-hydroxy-delta5-steroid dehydrogenase activity	--	--	--	--	UP	1.76224	0.000453111	UP	3.05883	8.47e-09	UP	4.71007	6.17e-19	UP	1.96327	7.13e-05	UP	4.97124	2.44e-20
Cluster-11149.26654	97.66	102.07	144.19	13.71	2.99	2218	747106509	XP_011101547.1	1939	2.3e-214	malate dehydrogenase [NADP], chloroplastic [Sesamum indicum]	XM_011103245.2	XM_011103245	835	0	PREDICTED: Sesamum indicum malate dehydrogenase [NADP], chloroplastic (LOC105179602), mRNA	K00051	E1.1.1.82	malate dehydrogenase (NADP+)	http://www.genome.jp/dbget-bin/www_bget?ko:K00051	P21528	1740	1.1e-192	Malate dehydrogenase [NADP], chloroplastic OS=Pisum sativum OX=3888 PE=1 SV=2	PF02866//PF00056	lactate/malate dehydrogenase, alpha/beta C-terminal domain//lactate/malate dehydrogenase, NAD binding domain	GO:0055114	oxidation-reduction process	GO:0016491//GO:0016616	oxidoreductase activity//oxidoreductase activity, acting on the CH-OH group of donors, NAD or NADP as acceptor	--	--	KOG1496	Malate dehydrogenase	UP	3.09711	1.55e-10	UP	1.79845	0.000519612	UP	4.7847	6.89e-21	UP	3.50695	6.38e-13	UP	5.25513	7.33e-24
Cluster-11149.12582	23.47	16.17	143.98	7.89	3.1	1832	747085327	XP_011090120.1	462	3.6e-43	cinnamoyl-CoA reductase 1-like isoform X2 [Sesamum indicum]	GU556154.1	GU556154	181	5.16e-87	Cistanche deserticola cinnamyl alcohol dehydrogenase (CAD1) mRNA, complete cds	-	-	-	http://www.genome.jp/dbget-bin/www_bget?ko:-	P51104	303	3.7e-26	Dihydroflavonol 4-reductase OS=Dianthus caryophyllus OX=3570 GN=A PE=2 SV=1	PF01073//PF01370	3-beta hydroxysteroid dehydrogenase/isomerase family//NAD dependent epimerase/dehydratase family	GO:0006694//GO:0008210//GO:0008209//GO:0055114//GO:0008207	steroid biosynthetic process//estrogen metabolic process//androgen metabolic process//oxidation-reduction process//C21-steroid hormone metabolic process	GO:0050662//GO:0003854//GO:0003824//GO:0016616	obsolete coenzyme binding//3-beta-hydroxy-delta5-steroid dehydrogenase activity//catalytic activity//oxidoreductase activity, acting on the CH-OH group of donors, NAD or NADP as acceptor	--	--	--	--	FALSE	1.23649	0.026249	FALSE	0.950631	0.127702	UP	2.07628	2.64e-05	UP	2.24574	5.33e-06	UP	3.1461	1.84e-10
Cluster-11149.20299	21.13	18.69	27.87	2.02	0.66	1941	848872885	XP_012837002.1	457	1.4e-42	PREDICTED: protein TIC 62, chloroplastic isoform X1 [Erythranthe guttata]	XM_020695706.1	XM_020695706	225	1.9e-111	PREDICTED: Sesamum indicum protein TIC 62, chloroplastic (LOC105169603), transcript variant X2, mRNA	-	-	-	http://www.genome.jp/dbget-bin/www_bget?ko:-	Q8SKU2	421	8.2e-40	Protein TIC 62, chloroplastic OS=Pisum sativum OX=3888 GN=TIC62 PE=1 SV=2	PF01073	3-beta hydroxysteroid dehydrogenase/isomerase family	GO:0008209//GO:0008207//GO:0055114//GO:0008210//GO:0006694	androgen metabolic process//C21-steroid hormone metabolic process//oxidation-reduction process//estrogen metabolic process//steroid biosynthetic process	GO:0016616//GO:0003854	oxidoreductase activity, acting on the CH-OH group of donors, NAD or NADP as acceptor//3-beta-hydroxy-delta5-steroid dehydrogenase activity	--	--	--	--	UP	3.40956	2.18e-11	FALSE	1.2114	0.103452	UP	4.50974	1.34e-16	UP	4.05796	3.29e-15	UP	5.21808	9.45e-21
Cluster-11149.8334	9.22	5.12	10.48	1.4	0.39	2118	848867230	XP_012834270.1	653	2.9e-65	PREDICTED: anthocyanidin reductase-like isoform X2 [Erythranthe guttata]	XM_012978816.1	XM_012978816	70	3.03e-25	PREDICTED: Erythranthe guttatus anthocyanidin reductase-like (LOC105955118), transcript variant X2, mRNA	-	-	-	http://www.genome.jp/dbget-bin/www_bget?ko:-	Q9SEV0	278	3.4e-23	Anthocyanidin reductase OS=Arabidopsis thaliana OX=3702 GN=BAN PE=1 SV=2	PF01073//PF02845//PF01370//PF00208	3-beta hydroxysteroid dehydrogenase/isomerase family//CUE domain//NAD dependent epimerase/dehydratase family//Glutamate/Leucine/Phenylalanine/Valine dehydrogenase	GO:0006520//GO:0008207//GO:0055114//GO:0006694//GO:0008210//GO:0008209	cellular amino acid metabolic process//C21-steroid hormone metabolic process//oxidation-reduction process//steroid biosynthetic process//estrogen metabolic process//androgen metabolic process	GO:0003854//GO:0016491//GO:0003824//GO:0016616//GO:0005515//GO:0050662	3-beta-hydroxy-delta5-steroid dehydrogenase activity//oxidoreductase activity//catalytic activity//oxidoreductase activity, acting on the CH-OH group of donors, NAD or NADP as acceptor//protein binding//obsolete coenzyme binding	--	--	--	--	UP	2.06885	0.000144294	FALSE	1.43639	0.0573546	UP	3.39389	3.66e-09	UP	3.39074	8.45e-11	UP	4.77515	8.15e-17
Cluster-11149.30482	33.79	63.46	75.62	7.54	2.82	2062	604301035	EYU20755.1	2294	1.5e-255	hypothetical protein MIMGU_mgv1a003445mg [Erythranthe guttata]	XM_011077035.2	XM_011077035	898	0	PREDICTED: Sesamum indicum thioredoxin reductase NTRC (LOC105159832), mRNA	K00384	trxB	thioredoxin reductase (NADPH)	http://www.genome.jp/dbget-bin/www_bget?ko:K00384	O22229	1948	7.4e-217	NADPH-dependent thioredoxin reductase 3 OS=Arabidopsis thaliana OX=3702 GN=NTRC PE=1 SV=2	PF00462//PF07992//PF01494//PF00085//PF01266	Glutaredoxin//Pyridine nucleotide-disulphide oxidoreductase//FAD binding domain//Thioredoxin//FAD dependent oxidoreductase	GO:0055114//GO:0045454//GO:0006118	oxidation-reduction process//cell redox homeostasis//obsolete electron transport	GO:0009055//GO:0015035//GO:0071949//GO:0016491	electron transfer activity//protein disulfide oxidoreductase activity//FAD binding//oxidoreductase activity	--	--	KOG0404	Thioredoxin reductase	UP	3.27426	2.12e-11	FALSE	1.01973	0.089722	UP	4.1831	7.03e-17	UP	2.83768	5.86e-09	UP	3.80713	2.15e-14
Cluster-11149.31123	68.57	42.62	75.24	4.49	3.02	2808	747081242	XP_011087899.1	1936	6.6e-214	uncharacterized protein LOC105169238 [Sesamum indicum]	XM_011089597.2	XM_011089597	876	0	PREDICTED: Sesamum indicum uncharacterized LOC105169238 (LOC105169238), mRNA	-	-	-	http://www.genome.jp/dbget-bin/www_bget?ko:-	Q8W4D6	1574	2.4e-173	Protein HIGH CHLOROPHYLL FLUORESCENCE PHENOTYPE 173, chloroplastic OS=Arabidopsis thaliana OX=3702 GN=HCF173 PE=1 SV=1	PF01073//PF01370//PF02254	3-beta hydroxysteroid dehydrogenase/isomerase family//NAD dependent epimerase/dehydratase family//TrkA-N domain	GO:0008210//GO:0006694//GO:0008209//GO:0006813//GO:0008207//GO:0055114	estrogen metabolic process//steroid biosynthetic process//androgen metabolic process//potassium ion transport//C21-steroid hormone metabolic process//oxidation-reduction process	GO:0050662//GO:0003854//GO:0003824//GO:0016616	obsolete coenzyme binding//3-beta-hydroxy-delta5-steroid dehydrogenase activity//catalytic activity//oxidoreductase activity, acting on the CH-OH group of donors, NAD or NADP as acceptor	--	--	--	--	UP	3.44607	2.35e-12	FALSE	0.174627	0.968817	UP	3.50983	5.64e-13	UP	4.60696	1.21e-19	UP	4.73142	1.42e-20
Cluster-11149.14491	3.08	5.97	2.66	0.39	0.11	1010	1600712066	TEY93755.1	1014	1.9e-107	xanthoxin dehydrogenase [Salvia splendens]	XM_027299005.1	XM_027299005	85	6.51e-34	PREDICTED: Coffea eugenioides zerumbone synthase-like (LOC113754623), mRNA	K09841	ABA2	xanthoxin dehydrogenase	http://www.genome.jp/dbget-bin/www_bget?ko:K09841	Q9C826	944	9.6e-101	Xanthoxin dehydrogenase OS=Arabidopsis thaliana OX=3702 GN=ABA2 PE=1 SV=1	PF01370//PF01073	NAD dependent epimerase/dehydratase family//3-beta hydroxysteroid dehydrogenase/isomerase family	GO:0008207//GO:0055114//GO:0008209//GO:0008210//GO:0006694	C21-steroid hormone metabolic process//oxidation-reduction process//androgen metabolic process//estrogen metabolic process//steroid biosynthetic process	GO:0003824//GO:0016616//GO:0003854//GO:0050662	catalytic activity//oxidoreductase activity, acting on the CH-OH group of donors, NAD or NADP as acceptor//3-beta-hydroxy-delta5-steroid dehydrogenase activity//obsolete coenzyme binding	--	--	--	--	UP	4.1168	2.57e-09	FALSE	1.33693	0.622538	UP	5.33741	3.3e-10	UP	3.62443	1.25e-06	UP	4.89557	7.64e-08
Cluster-11149.26977	27.33	35.43	40.23	6.48	2.06	1898	747104657	XP_011100573.1	2688	2.8e-301	glucose-6-phosphate 1-dehydrogenase, chloroplastic [Sesamum indicum]	XM_011102271.2	XM_011102271	1135	0	PREDICTED: Sesamum indicum glucose-6-phosphate 1-dehydrogenase, chloroplastic (LOC105178736), mRNA	K00036	G6PD, zwf	glucose-6-phosphate 1-dehydrogenase [EC:1.1.1.49 1.1.1.363]	http://www.genome.jp/dbget-bin/www_bget?ko:K00036	Q43839	2397	5.9e-269	Glucose-6-phosphate 1-dehydrogenase, chloroplastic OS=Solanum tuberosum OX=4113 PE=1 SV=1	PF02781//PF00479	Glucose-6-phosphate dehydrogenase, C-terminal domain//Glucose-6-phosphate dehydrogenase, NAD binding domain	GO:0006749//GO:0006006//GO:0006098//GO:0055114	glutathione metabolic process//glucose metabolic process//pentose-phosphate shunt//oxidation-reduction process	GO:0050661//GO:0004345//GO:0016614	NADP binding//glucose-6-phosphate dehydrogenase activity//oxidoreductase activity, acting on CH-OH group of donors	--	--	KOG0563	Glucose-6-phosphate 1-dehydrogenase	UP	2.65313	6.02e-08	FALSE	1.25343	0.0322171	UP	3.79564	5.09e-14	UP	2.75083	1.86e-08	UP	3.95384	6.93e-15
Cluster-11149.23537	117.07	166	280.57	18.82	17.93	1522	1315960034	GAY47925.1	714	1.8e-72	hypothetical protein CUMW_108100 [Citrus unshiu]	XM_011096569.2	XM_011096569	325	3.81e-167	PREDICTED: Sesamum indicum uncharacterized protein At5g02240 (LOC105174458), mRNA	-	-	-	http://www.genome.jp/dbget-bin/www_bget?ko:-	O80934	683	2.7e-70	Uncharacterized protein At2g37660, chloroplastic OS=Arabidopsis thaliana OX=3702 GN=At2g37660 PE=1 SV=2	PF01113//PF01370//PF01073	Dihydrodipicolinate reductase, N-terminus//NAD dependent epimerase/dehydratase family//3-beta hydroxysteroid dehydrogenase/isomerase family	GO:0008209//GO:0009089//GO:0008210//GO:0006694//GO:0008207//GO:0055114//GO:0009085	androgen metabolic process//lysine biosynthetic process via diaminopimelate//estrogen metabolic process//steroid biosynthetic process//C21-steroid hormone metabolic process//oxidation-reduction process//lysine biosynthetic process	GO:0050662//GO:0016616//GO:0008839//GO:0003824//GO:0003854	obsolete coenzyme binding//oxidoreductase activity, acting on the CH-OH group of donors, NAD or NADP as acceptor//4-hydroxy-tetrahydrodipicolinate reductase//catalytic activity//3-beta-hydroxy-delta5-steroid dehydrogenase activity	--	--	--	--	UP	3.34401	6.26e-12	FALSE	-0.327218	0.751054	UP	2.90598	8.32e-10	UP	3.30981	9.7e-12	UP	2.93254	6.94e-10
Cluster-11149.19931	14.38	10.95	20.05	3.62	1.33	2291	1276262763	PIN19406.1	297	6.1e-24	hypothetical protein CDL12_07910 [Handroanthus impetiginosus]	XM_012988937.1	XM_012988937	135	2.41e-61	PREDICTED: Erythranthe guttatus uncharacterized LOC105964425 (LOC105964425), mRNA	-	-	-	http://www.genome.jp/dbget-bin/www_bget?ko:-	--	--	--	--	PF07127//PF01222	Late nodulin protein//Ergosterol biosynthesis ERG4/ERG24 family	GO:0009878//GO:0016126	nodule morphogenesis//sterol biosynthetic process	GO:0016628//GO:0046872	oxidoreductase activity, acting on the CH-CH group of donors, NAD or NADP as acceptor//metal ion binding	GO:0016020	membrane	--	--	UP	1.79996	0.000493215	FALSE	1.04802	0.102814	UP	2.73705	6.37e-08	UP	2.6658	7.58e-08	UP	3.66332	7.08e-13
Cluster-11149.31811	13.82	17.36	28.31	3.5	2	1541	1276265132	PIN21436.1	800	1.9e-82	putative dehydrogenase [Handroanthus impetiginosus]	XM_011103123.2	XM_011103123	455	0	PREDICTED: Sesamum indicum uncharacterized LOC105179488 (LOC105179488), transcript variant X2, mRNA	-	-	-	http://www.genome.jp/dbget-bin/www_bget?ko:-	--	--	--	--	PF01370//PF02254//PF03435//PF01073//PF02918	NAD dependent epimerase/dehydratase family//TrkA-N domain//Saccharopine dehydrogenase NADP binding domain//3-beta hydroxysteroid dehydrogenase/isomerase family//Pertussis toxin, subunit 2 and 3, C-terminal domain	GO:0008210//GO:0006694//GO:0009405//GO:0008209//GO:0006813//GO:0008207//GO:0055114	estrogen metabolic process//steroid biosynthetic process//pathogenesis//androgen metabolic process//potassium ion transport//C21-steroid hormone metabolic process//oxidation-reduction process	GO:0050662//GO:0016491//GO:0003854//GO:0003824//GO:0016616	obsolete coenzyme binding//oxidoreductase activity//3-beta-hydroxy-delta5-steroid dehydrogenase activity//catalytic activity//oxidoreductase activity, acting on the CH-OH group of donors, NAD or NADP as acceptor	GO:0005576	extracellular region	--	--	UP	2.51245	7.34e-07	FALSE	0.409294	0.709361	UP	2.81078	3.28e-08	UP	2.65351	1.63e-07	UP	3.01236	3.27e-09
Cluster-11149.27863	11.31	12.35	14.73	3.44	1.21	2176	747099228	XP_011097662.1	906	1.4e-94	uncharacterized protein LOC105176535 isoform X1 [Sesamum indicum]	XM_011099360.2	XM_011099360	419	0	PREDICTED: Sesamum indicum renalase (LOC105176535), transcript variant X1, mRNA	K06955	K06955	uncharacterized protein	http://www.genome.jp/dbget-bin/www_bget?ko:K06955	Q888A4	174	4e-11	Renalase OS=Pseudomonas syringae pv. tomato (strain ATCC BAA-871 / DC3000) OX=223283 GN=PSPTO_1126 PE=1 SV=1	PF01210//PF01593//PF03721//PF07992//PF01494//PF00743//PF02737//PF01266	NAD-dependent glycerol-3-phosphate dehydrogenase N-terminus//Flavin containing amine oxidoreductase//UDP-glucose/GDP-mannose dehydrogenase family, NAD binding domain//Pyridine nucleotide-disulphide oxidoreductase//FAD binding domain//Flavin-binding monooxygenase-like//3-hydroxyacyl-CoA dehydrogenase, NAD binding domain//FAD dependent oxidoreductase	GO:0006574//GO:0018874//GO:0006631//GO:0006554//GO:0046168//GO:0055114//GO:0006633//GO:0006550//GO:0006568//GO:0006552	valine catabolic process//benzoate metabolic process//fatty acid metabolic process//lysine catabolic process//glycerol-3-phosphate catabolic process//oxidation-reduction process//fatty acid biosynthetic process//isoleucine catabolic process//tryptophan metabolic process//leucine catabolic process	GO:0016491//GO:0016616//GO:0071949//GO:0050661//GO:0003857//GO:0004499//GO:0051287//GO:0050660	oxidoreductase activity//oxidoreductase activity, acting on the CH-OH group of donors, NAD or NADP as acceptor//FAD binding//NADP binding//3-hydroxyacyl-CoA dehydrogenase activity//N,N-dimethylaniline monooxygenase activity//NAD binding//flavin adenine dinucleotide binding	--	--	--	--	UP	2.04516	6.07e-05	FALSE	1.11355	0.0823397	UP	3.04775	2.33e-09	UP	2.39195	1.91e-06	UP	3.45492	2.02e-11
Cluster-11149.30283	2.54	3.28	4.46	0.76	0.41	1417	1585759815	XP_028075327.1	344	1.3e-29	probable flavin-containing monooxygenase 1 [Camellia sinensis]	--	--	--	--	--	K00485	FMO	dimethylaniline monooxygenase (N-oxide forming)	http://www.genome.jp/dbget-bin/www_bget?ko:K00485	Q9LMA1	143	1e-07	Probable flavin-containing monooxygenase 1 OS=Arabidopsis thaliana OX=3702 GN=FMO1 PE=2 SV=1	PF01593//PF01266//PF00743	Flavin containing amine oxidoreductase//FAD dependent oxidoreductase//Flavin-binding monooxygenase-like	GO:0055114	oxidation-reduction process	GO:0004499//GO:0016491//GO:0050661//GO:0050660	N,N-dimethylaniline monooxygenase activity//oxidoreductase activity//NADP binding//flavin adenine dinucleotide binding	--	--	KOG1399	Flavin-containing monooxygenase	UP	2.30708	0.000280324	FALSE	0.504115	0.863044	UP	2.69947	5.18e-05	UP	2.4077	0.000177893	UP	2.85942	1.79e-05
Cluster-11149.14255	26.92	17.88	25.67	4.42	2.43	1560	747042745	XP_011080083.1	1575	2.6e-172	glyoxylate/succinic semialdehyde reductase 2, chloroplastic [Sesamum indicum]	XM_011081781.2	XM_011081781	740	0	PREDICTED: Sesamum indicum glyoxylate/succinic semialdehyde reductase 2, chloroplastic (LOC105163438), mRNA	K18121	GLYR	glyoxylate/succinic semialdehyde reductase [EC:1.1.1.79 1.1.1.-]	http://www.genome.jp/dbget-bin/www_bget?ko:K18121	F4I907	1265	8.9e-138	Glyoxylate/succinic semialdehyde reductase 2, chloroplastic OS=Arabidopsis thaliana OX=3702 GN=GLYR2 PE=1 SV=1	PF01210//PF00537//PF02826//PF02153//PF02737//PF03435//PF14833//PF03446	NAD-dependent glycerol-3-phosphate dehydrogenase N-terminus//Scorpion toxin-like domain//D-isomer specific 2-hydroxyacid dehydrogenase, NAD binding domain//Prephenate dehydrogenase//3-hydroxyacyl-CoA dehydrogenase, NAD binding domain//Saccharopine dehydrogenase NADP binding domain//NAD-binding of NADP-dependent 3-hydroxyisobutyrate dehydrogenase//NAD binding domain of 6-phosphogluconate dehydroge…	GO:0006571//GO:0055114//GO:0006554//GO:0000162//GO:0046168//GO:0006552//GO:0006568//GO:0006550//GO:0006633//GO:0006810//GO:0009094//GO:0006574//GO:0009405//GO:0018874//GO:0006631	tyrosine biosynthetic process//oxidation-reduction process//lysine catabolic process//tryptophan biosynthetic process//glycerol-3-phosphate catabolic process//leucine catabolic process//tryptophan metabolic process//isoleucine catabolic process//fatty acid biosynthetic process//transport//L-phenylalanine biosynthetic process//valine catabolic process//pathogenesis//benzoate metabolic process//fat…	GO:0051287//GO:0008977//GO:0008200//GO:0004665//GO:0016616//GO:0016491//GO:0050661//GO:0019871//GO:0003857	NAD binding//prephenate dehydrogenase (NAD+) activity//ion channel inhibitor activity//prephenate dehydrogenase (NADP+) activity//oxidoreductase activity, acting on the CH-OH group of donors, NAD or NADP as acceptor//oxidoreductase activity//NADP binding//sodium channel inhibitor activity//3-hydroxyacyl-CoA dehydrogenase activity	GO:0005576	extracellular region	KOG0409	Predicted dehydrogenase	UP	2.22003	1.15e-05	FALSE	0.463359	0.636629	UP	2.57247	2.88e-07	UP	3.28024	5.43e-11	UP	3.69321	2.84e-13
Cluster-11149.32673	1.13	0.4	0.94	0.13	0.09	1231	1276265132	PIN21436.1	150	3.6e-07	putative dehydrogenase [Handroanthus impetiginosus]	XM_011103123.2	XM_011103123	136	3.56e-62	PREDICTED: Sesamum indicum uncharacterized LOC105179488 (LOC105179488), transcript variant X2, mRNA	-	-	-	http://www.genome.jp/dbget-bin/www_bget?ko:-	--	--	--	--	PF02918//PF01370//PF03435	Pertussis toxin, subunit 2 and 3, C-terminal domain//NAD dependent epimerase/dehydratase family//Saccharopine dehydrogenase NADP binding domain	GO:0009405//GO:0055114	pathogenesis//oxidation-reduction process	GO:0016491//GO:0003824//GO:0050662	oxidoreductase activity//catalytic activity//obsolete coenzyme binding	GO:0005576	extracellular region	--	--	FALSE	1.80282	0.380656	FALSE	0.152607	1	FALSE	1.84068	0.278621	UP	3.73178	0.000172047	UP	3.8219	0.00035926
Cluster-11149.27816	16.77	26.82	30.37	3.63	3.17	1972	1276245597	PIN05638.1	1812	1.1e-199	UDP-N-acetylglucosamine 4,6-dehydratase (inverting) [Handroanthus impetiginosus]	XR_847942.2	XR_847942	647	0	PREDICTED: Sesamum indicum uncharacterized LOC105163644 (LOC105163644), transcript variant X4, misc_RNA	-	-	-	http://www.genome.jp/dbget-bin/www_bget?ko:-	--	--	--	--	PF01118//PF01370//PF01073//PF03435//PF01113//PF00056//PF16045//PF00185	Semialdehyde dehydrogenase, NAD binding domain//NAD dependent epimerase/dehydratase family//3-beta hydroxysteroid dehydrogenase/isomerase family//Saccharopine dehydrogenase NADP binding domain//Dihydrodipicolinate reductase, N-terminus//lactate/malate dehydrogenase, NAD binding domain//LisH//Aspartate/ornithine carbamoyltransferase, Asp/Orn binding domain	GO:0008209//GO:0006520//GO:0055114//GO:0008207//GO:0009089//GO:0006694//GO:0008210//GO:0009085	androgen metabolic process//cellular amino acid metabolic process//oxidation-reduction process//C21-steroid hormone metabolic process//lysine biosynthetic process via diaminopimelate//steroid biosynthetic process//estrogen metabolic process//lysine biosynthetic process	GO:0005515//GO:0050662//GO:0016620//GO:0051287//GO:0016743//GO:0003824//GO:0008839//GO:0016616//GO:0016597//GO:0016491//GO:0003854	protein binding//obsolete coenzyme binding//oxidoreductase activity, acting on the aldehyde or oxo group of donors, NAD or NADP as acceptor//NAD binding//carboxyl- or carbamoyltransferase activity//catalytic activity//4-hydroxy-tetrahydrodipicolinate reductase//oxidoreductase activity, acting on the CH-OH group of donors, NAD or NADP as acceptor//amino acid binding//oxidoreductase activity//3-bet…	--	--	--	--	UP	3.08808	4.92e-10	FALSE	-0.203696	0.940531	UP	2.77349	1.19e-08	UP	2.88318	6.39e-09	UP	2.62931	8.44e-08
Cluster-11149.34235	30.04	59.06	81.07	16.89	9.25	1418	747079105	XP_011086739.1	1044	9e-111	3-oxoacyl-[acyl-carrier-protein] reductase 4 [Sesamum indicum]	XM_012995801.1	XM_012995801	538	0	PREDICTED: Erythranthe guttatus 3-oxoacyl-[acyl-carrier-protein] reductase 4 (LOC105970961), mRNA	K00059	fabG	3-oxoacyl-[acyl-carrier protein] reductase	http://www.genome.jp/dbget-bin/www_bget?ko:K00059	P28643	840	1.5e-88	3-oxoacyl-[acyl-carrier-protein] reductase, chloroplastic OS=Cuphea lanceolata OX=3930 GN=CLKR27 PE=2 SV=1	PF02882//PF01095//PF12242	Tetrahydrofolate dehydrogenase/cyclohydrolase, NAD(P)-binding domain//Pectinesterase//NAD(P)H binding domain of trans-2-enoyl-CoA reductase	GO:0042545//GO:0055114//GO:0046487//GO:0009396//GO:0005982//GO:0005985	cell wall modification//oxidation-reduction process//glyoxylate metabolic process//folic acid-containing compound biosynthetic process//starch metabolic process//sucrose metabolic process	GO:0004488//GO:0016491//GO:0030599	methylenetetrahydrofolate dehydrogenase (NADP+) activity//oxidoreductase activity//pectinesterase activity	--	--	KOG1200	Mitochondrial/plastidial beta-ketoacyl-ACP reductase	UP	2.0101	4.8e-05	FALSE	0.470916	0.554165	UP	2.3702	6.76e-07	UP	1.50344	0.00354883	UP	1.92426	7.31e-05
Cluster-11149.16432	4.44	6.95	4.78	0.58	0.55	1339	1276264457	PIN20861.1	997	2.4e-105	Flavin-containing monooxygenase [Handroanthus impetiginosus]	XM_027303236.1	XM_027303236	81	1.46e-31	PREDICTED: Coffea eugenioides flavin-containing monooxygenase FMO GS-OX5-like (LOC113760592), transcript variant X2, mRNA	-	-	-	http://www.genome.jp/dbget-bin/www_bget?ko:-	Q9SXD9	681	4e-70	Flavin-containing monooxygenase FMO GS-OX-like 7 OS=Arabidopsis thaliana OX=3702 GN=At1g62580 PE=3 SV=2	PF07992//PF01494//PF03446//PF00743//PF02737//PF01593//PF03721//PF01210//PF01266	Pyridine nucleotide-disulphide oxidoreductase//FAD binding domain//NAD binding domain of 6-phosphogluconate dehydrogenase//Flavin-binding monooxygenase-like//3-hydroxyacyl-CoA dehydrogenase, NAD binding domain//Flavin containing amine oxidoreductase//UDP-glucose/GDP-mannose dehydrogenase family, NAD binding domain//NAD-dependent glycerol-3-phosphate dehydrogenase N-terminus//FAD dependent oxidore…	GO:0018874//GO:0006631//GO:0006574//GO:0006552//GO:0006568//GO:0006550//GO:0006633//GO:0055114//GO:0006554//GO:0046168	benzoate metabolic process//fatty acid metabolic process//valine catabolic process//leucine catabolic process//tryptophan metabolic process//isoleucine catabolic process//fatty acid biosynthetic process//oxidation-reduction process//lysine catabolic process//glycerol-3-phosphate catabolic process	GO:0004499//GO:0050661//GO:0003857//GO:0071949//GO:0016616//GO:0016491//GO:0050660//GO:0051287	N,N-dimethylaniline monooxygenase activity//NADP binding//3-hydroxyacyl-CoA dehydrogenase activity//FAD binding//oxidoreductase activity, acting on the CH-OH group of donors, NAD or NADP as acceptor//oxidoreductase activity//flavin adenine dinucleotide binding//NAD binding	--	--	--	--	UP	3.76357	3.28e-10	FALSE	-0.314755	1	UP	3.33691	2.57e-08	UP	3.58418	6.84e-09	UP	3.2179	1.88e-07
Cluster-11149.29261	3.57	6.48	2.24	0.84	0.26	3053	147766872	CAN60947.1	615	1.1e-60	hypothetical protein VITISV_015758 [Vitis vinifera]	LT594793.1	LT594793	159	1.47e-74	Theobroma cacao genome assembly, chromosome: VI	-	-	-	http://www.genome.jp/dbget-bin/www_bget?ko:-	P04146	241	9.6e-19	Copia protein OS=Drosophila melanogaster OX=7227 GN=GIP PE=1 SV=3	PF00479//PF09776	Glucose-6-phosphate dehydrogenase, NAD binding domain//Mitochondrial ribosomal protein L55	GO:0042254//GO:0006006//GO:0055114	ribosome biogenesis//glucose metabolic process//oxidation-reduction process	GO:0003735//GO:0050661//GO:0016614	structural constituent of ribosome//NADP binding//oxidoreductase activity, acting on CH-OH group of donors	GO:0005840//GO:0005762	ribosome//mitochondrial large ribosomal subunit	--	--	UP	3.14068	2.14e-09	FALSE	1.2899	0.100591	UP	4.31915	2.7e-14	UP	2.20868	5.53e-05	UP	3.44673	2.98e-09
Cluster-11149.22746	117.8	135.75	226.84	98	30.46	2191	1276231384	PIM97220.1	869	2.7e-90	Ubiquinone biosynthesis methyltransferase COQ5 [Handroanthus impetiginosus]	XM_011081626.2	XM_011081626	377	0	PREDICTED: Sesamum indicum 2-methyl-6-phytyl-1,4-hydroquinone methyltransferase, chloroplastic (LOC105163320), transcript variant X1, mRNA	K12502	VTE3, APG1	MPBQ/MSBQ methyltransferase	http://www.genome.jp/dbget-bin/www_bget?ko:K12502	P23525	788	2.6e-82	2-methyl-6-phytyl-1,4-hydroquinone methyltransferase, chloroplastic OS=Spinacia oleracea OX=3562 PE=1 SV=1	PF03435//PF08241//PF03083//PF05175//PF00891//PF02527//PF01209	Saccharopine dehydrogenase NADP binding domain//Methyltransferase domain//Sugar efflux transporter for intercellular exchange//Methyltransferase small domain//O-methyltransferase domain//rRNA small subunit methyltransferase G//ubiE/COQ5 methyltransferase family	GO:0006396//GO:0006364//GO:0055114//GO:0000154	RNA processing//rRNA processing//oxidation-reduction process//rRNA modification	GO:0008171//GO:0016491//GO:0008649//GO:0008168	O-methyltransferase activity//oxidoreductase activity//rRNA methyltransferase activity//methyltransferase activity	GO:0005737//GO:0016021	cytoplasm//integral component of membrane	--	--	FALSE	0.671568	0.316766	FALSE	1.2893	0.0136338	UP	1.85008	8.63e-05	FALSE	0.940388	0.0960847	UP	2.17966	3.62e-06
Cluster-11149.30916	13.01	30.69	23.1	3.21	3.14	1854	1276235994	PIM99137.1	854	1.3e-88	Eugenol synthase [Handroanthus impetiginosus]	XM_012999571.1	XM_012999571	287	6.21e-146	PREDICTED: Erythranthe guttatus eugenol synthase 1-like (LOC105974464), mRNA	-	-	-	http://www.genome.jp/dbget-bin/www_bget?ko:-	Q15GI4	735	3e-76	Eugenol synthase 1 OS=Ocimum basilicum OX=39350 GN=EGS1 PE=1 SV=1	PF03435	Saccharopine dehydrogenase NADP binding domain	GO:0055114	oxidation-reduction process	GO:0016491	oxidoreductase activity	--	--	--	--	UP	3.45845	5.68e-12	FALSE	-0.363898	0.751054	UP	2.98364	1.01e-09	UP	2.69245	8.81e-08	UP	2.2784	4.46e-06
Cluster-11149.24758	12.8	19.38	29.23	8.42	4.19	2722	747047461	XP_011069704.1	544	1.6e-52	uncharacterized protein At1g32220, chloroplastic isoform X1 [Sesamum indicum]	XM_011071403.2	XM_011071403	252	2.62e-126	PREDICTED: Sesamum indicum uncharacterized protein At1g32220, chloroplastic (LOC105155515), transcript variant X2, mRNA	-	-	-	http://www.genome.jp/dbget-bin/www_bget?ko:-	Q9FVR6	453	2.2e-43	Uncharacterized protein At1g32220, chloroplastic OS=Arabidopsis thaliana OX=3702 GN=At1g32220 PE=1 SV=1	PF01370//PF01073//PF00734	NAD dependent epimerase/dehydratase family//3-beta hydroxysteroid dehydrogenase/isomerase family//Fungal cellulose binding domain	GO:0008207//GO:0055114//GO:0008209//GO:0006694//GO:0008210//GO:0005975	C21-steroid hormone metabolic process//oxidation-reduction process//androgen metabolic process//steroid biosynthetic process//estrogen metabolic process//carbohydrate metabolic process	GO:0003824//GO:0016616//GO:0003854//GO:0050662//GO:0030248	catalytic activity//oxidoreductase activity, acting on the CH-OH group of donors, NAD or NADP as acceptor//3-beta-hydroxy-delta5-steroid dehydrogenase activity//obsolete coenzyme binding//cellulose binding	GO:0005576	extracellular region	--	--	FALSE	1.40318	0.00771139	FALSE	0.61047	0.380601	UP	1.90284	7.97e-05	FALSE	1.27993	0.0162169	UP	1.8403	0.000162161
Cluster-11149.25838	10.07	28.71	14.18	4.73	2.27	3740	1276260984	PIN17919.1	2194	1.1e-243	Cyclopropane-fatty-acyl-phospholipid synthase [Handroanthus impetiginosus]	XM_011075264.2	XM_011075264	885	0	PREDICTED: Sesamum indicum uncharacterized LOC105158481 (LOC105158481), transcript variant X3, mRNA	K00574	cfa	cyclopropane-fatty-acyl-phospholipid synthase	http://www.genome.jp/dbget-bin/www_bget?ko:K00574	O53732	528	6.2e-52	Tuberculostearic acid methyltransferase UfaA1 OS=Mycobacterium tuberculosis (strain ATCC 25618 / H37Rv) OX=83332 GN=ufaA1 PE=1 SV=3	PF01593//PF02737//PF05891//PF01209//PF09445//PF05401//PF00743//PF01266//PF05175//PF08241//PF01494//PF02390//PF07992//PF03721//PF08123	Flavin containing amine oxidoreductase//3-hydroxyacyl-CoA dehydrogenase, NAD binding domain//AdoMet dependent proline di-methyltransferase//ubiE/COQ5 methyltransferase family//RNA cap guanine-N2 methyltransferase//Nodulation protein S (NodS)//Flavin-binding monooxygenase-like//FAD dependent oxidoreductase//Methyltransferase small domain//Methyltransferase domain//FAD binding domain//Putative meth…	GO:0009452//GO:0006400//GO:0006574//GO:0009877//GO:0006480//GO:0006631//GO:0018874//GO:0055114//GO:0009312//GO:0009451//GO:0006554//GO:0006479//GO:0001510//GO:0006568//GO:0006552//GO:0006550//GO:0008033//GO:0006633	7-methylguanosine RNA capping//tRNA modification//valine catabolic process//nodulation//N-terminal protein amino acid methylation//fatty acid metabolic process//benzoate metabolic process//oxidation-reduction process//oligosaccharide biosynthetic process//RNA modification//lysine catabolic process//protein methylation//RNA methylation//tryptophan metabolic process//leucine catabolic process//isol…	GO:0016616//GO:0016491//GO:0004499//GO:0008168//GO:0050661//GO:0003857//GO:0071949//GO:0008757//GO:0051287//GO:0018024//GO:0050660//GO:0008176	oxidoreductase activity, acting on the CH-OH group of donors, NAD or NADP as acceptor//oxidoreductase activity//N,N-dimethylaniline monooxygenase activity//methyltransferase activity//NADP binding//3-hydroxyacyl-CoA dehydrogenase activity//FAD binding//S-adenosylmethionine-dependent methyltransferase activity//NAD binding//histone-lysine N-methyltransferase activity//flavin adenine dinucleotide b…	--	--	--	--	UP	2.80041	8.01e-09	FALSE	0.66619	0.350109	UP	3.35576	4.69e-12	UP	1.76635	0.00045274	UP	2.38239	8.86e-07
Cluster-11149.25800	13.39	24.17	29.63	24.76	4.84	2312	443540471	AGC94919.1	2166	1.2e-240	putative squaline epoxidase [Withania somnifera]	XM_011080168.2	XM_011080168	986	0	PREDICTED: Sesamum indicum squalene monooxygenase (LOC105162196), mRNA	K00511	SQLE, ERG1	squalene monooxygenase	http://www.genome.jp/dbget-bin/www_bget?ko:K00511	O48651	2075	1.6e-231	Squalene monooxygenase SE1 OS=Panax ginseng OX=4054 GN=SQE1 PE=2 SV=1	PF02254//PF01266//PF08491//PF01494//PF07992//PF01210	TrkA-N domain//FAD dependent oxidoreductase//Squalene epoxidase//FAD binding domain//Pyridine nucleotide-disulphide oxidoreductase//NAD-dependent glycerol-3-phosphate dehydrogenase N-terminus	GO:0006813//GO:0055114//GO:0016114//GO:0046168//GO:0006694	potassium ion transport//oxidation-reduction process//terpenoid biosynthetic process//glycerol-3-phosphate catabolic process//steroid biosynthetic process	GO:0016616//GO:0051287//GO:0016491//GO:0004506//GO:0050660//GO:0071949	oxidoreductase activity, acting on the CH-OH group of donors, NAD or NADP as acceptor//NAD binding//oxidoreductase activity//squalene monooxygenase activity//flavin adenine dinucleotide binding//FAD binding	GO:0016021	integral component of membrane	KOG1298	Squalene monooxygenase	FALSE	0.166567	1	UP	1.95886	9.05e-05	UP	2.01462	2.92e-05	FALSE	-0.21173	0.924197	UP	1.69701	0.000578752
Cluster-11149.6737	3.79	7.77	6.95	1.97	1.16	958	747042879	XP_011080783.1	916	4.2e-96	hydroxyphenylpyruvate reductase-like [Sesamum indicum]	MG869898.1	MG869898	160	1.25e-75	Mentha longifolia voucher ML-K hydroxyphenylpyruvate reductase (HPPR) mRNA, complete cds	K15919	HPR2	hydroxypyruvate reductase 2	http://www.genome.jp/dbget-bin/www_bget?ko:K15919	Q65CJ7	831	1.2e-87	Hydroxyphenylpyruvate reductase OS=Plectranthus scutellarioides OX=4142 GN=HPPR PE=1 SV=2	PF00389//PF03446//PF00899//PF02826	D-isomer specific 2-hydroxyacid dehydrogenase, catalytic domain//NAD binding domain of 6-phosphogluconate dehydrogenase//ThiF family//D-isomer specific 2-hydroxyacid dehydrogenase, NAD binding domain	GO:0055114	oxidation-reduction process	GO:0051287//GO:0050661//GO:0016616//GO:0008641	NAD binding//NADP binding//oxidoreductase activity, acting on the CH-OH group of donors, NAD or NADP as acceptor//ubiquitin-like modifier activating enzyme activity	--	--	KOG0069	Glyoxylate/hydroxypyruvate reductase (D-isomer-specific 2-hydroxy acid dehydrogenase superfamily)	UP	2.18066	0.000234501	FALSE	0.369986	0.843659	UP	2.43934	3.73e-05	FALSE	1.60766	0.0142958	UP	1.92651	0.00261687
Cluster-11149.24522	83.06	135.6	134.68	62.54	24.09	2013	1276251721	PIN10332.1	1892	6e-209	dTDP-glucose 4-6-dehydratase/UDP-glucuronic acid decarboxylase [Handroanthus impetiginosus]	XM_011075172.2	XM_011075172	769	0	PREDICTED: Sesamum indicum GDP-mannose 3,5-epimerase 2 (LOC105158417), mRNA	K10046	GME	GDP-D-mannose 3', 5'-epimerase [EC:5.1.3.18 5.1.3.-]	http://www.genome.jp/dbget-bin/www_bget?ko:K10046	Q2R1V8	1842	1.4e-204	GDP-mannose 3,5-epimerase 2 OS=Oryza sativa subsp. japonica OX=39947 GN=GME-2 PE=2 SV=2	PF01073//PF01370	3-beta hydroxysteroid dehydrogenase/isomerase family//NAD dependent epimerase/dehydratase family	GO:0055114//GO:0008207//GO:0006694//GO:0008210//GO:0008209	oxidation-reduction process//C21-steroid hormone metabolic process//steroid biosynthetic process//estrogen metabolic process//androgen metabolic process	GO:0003854//GO:0003824//GO:0016616//GO:0050662	3-beta-hydroxy-delta5-steroid dehydrogenase activity//catalytic activity//oxidoreductase activity, acting on the CH-OH group of donors, NAD or NADP as acceptor//obsolete coenzyme binding	--	--	KOG1429	dTDP-glucose 4-6-dehydratase/UDP-glucuronic acid decarboxylase	FALSE	1.31837	0.0120236	FALSE	0.98012	0.0810008	UP	2.1877	3.09e-06	FALSE	1.08379	0.0474184	UP	2.01388	2.05e-05
Cluster-11149.25812	38.65	88.07	86.39	38.61	16.09	3371	1276266185	PIN22328.1	4012	0	Homoserine dehydrogenase [Handroanthus impetiginosus]	XM_011097147.2	XM_011097147	1894	0	PREDICTED: Sesamum indicum bifunctional aspartokinase/homoserine dehydrogenase 1, chloroplastic-like (LOC105174896), mRNA	K12524	thrA	bifunctional aspartokinase / homoserine dehydrogenase 1 [EC:2.7.2.4 1.1.1.3]	http://www.genome.jp/dbget-bin/www_bget?ko:K12524	Q9SA18	3437	0	Bifunctional aspartokinase/homoserine dehydrogenase 1, chloroplastic OS=Arabidopsis thaliana OX=3702 GN=AKHSDH1 PE=1 SV=1	PF00411//PF00742//PF00208//PF03447	Ribosomal protein S11//Homoserine dehydrogenase//Glutamate/Leucine/Phenylalanine/Valine dehydrogenase//Homoserine dehydrogenase, NAD binding domain	GO:0042254//GO:0006412//GO:0055114//GO:0006520	ribosome biogenesis//translation//oxidation-reduction process//cellular amino acid metabolic process	GO:0050661//GO:0003735//GO:0016491	NADP binding//structural constituent of ribosome//oxidoreductase activity	GO:0005840	ribosome	KOG0456	Aspartate kinase	FALSE	1.38986	0.0073297	FALSE	0.86665	0.138796	UP	2.14572	4.73e-06	FALSE	0.677742	0.295045	UP	1.49436	0.00202326
Cluster-11149.17434	18.99	27.94	29.12	8.47	5.46	2622	747075291	XP_011084675.1	1398	1.5e-151	peptide chain release factor PrfB1, chloroplastic [Sesamum indicum]	XM_011086373.2	XM_011086373	822	0	PREDICTED: Sesamum indicum peptide chain release factor PrfB1, chloroplastic (LOC105166872), mRNA	-	-	-	http://www.genome.jp/dbget-bin/www_bget?ko:-	Q9LVY0	1183	4.8e-128	Peptide chain release factor PrfB1, chloroplastic OS=Arabidopsis thaliana OX=3702 GN=PRFB1 PE=2 SV=1	PF03462//PF16326//PF00472//PF03720	PCRF domain//ABC transporter C-terminal domain//RF-1 domain//UDP-glucose/GDP-mannose dehydrogenase family, UDP binding domain	GO:0055114//GO:0006415//GO:0006449	oxidation-reduction process//translational termination//regulation of translational termination	GO:0016616//GO:0003747//GO:0003677//GO:0051287	oxidoreductase activity, acting on the CH-OH group of donors, NAD or NADP as acceptor//translation release factor activity//DNA binding//NAD binding	GO:0018444//GO:0005840	translation release factor complex//ribosome	KOG2726	Mitochondrial polypeptide chain release factor	UP	1.923	0.000106509	FALSE	0.237956	0.873901	UP	2.05014	1.76e-05	UP	1.84064	0.000215808	UP	2.02852	2.55e-05
Cluster-11149.6738	10.58	10.55	12.74	2.86	2.49	352	604305558	EYU24702.1	425	1.3e-39	hypothetical protein MIMGU_mgv1a010401mg [Erythranthe guttata]	XM_012997222.1	XM_012997222	206	1.16e-101	PREDICTED: Erythranthe guttatus hydroxyphenylpyruvate reductase-like (LOC105972286), mRNA	K15919	HPR2	hydroxypyruvate reductase 2	http://www.genome.jp/dbget-bin/www_bget?ko:K15919	Q65CJ7	362	1e-33	Hydroxyphenylpyruvate reductase OS=Plectranthus scutellarioides OX=4142 GN=HPPR PE=1 SV=2	PF00389	D-isomer specific 2-hydroxyacid dehydrogenase, catalytic domain	GO:0055114	oxidation-reduction process	GO:0016616//GO:0051287	oxidoreductase activity, acting on the CH-OH group of donors, NAD or NADP as acceptor//NAD binding	--	--	--	--	FALSE	2.13544	0.0231407	FALSE	-0.198466	1	FALSE	1.82454	0.0566864	FALSE	2.48995	0.0050781	FALSE	2.23838	0.00903613
Cluster-11149.24587	22.11	46.39	41.84	14.94	8.25	1632	848892063	XP_012846124.1	1665	1e-182	PREDICTED: aspartate-semialdehyde dehydrogenase [Erythranthe guttata]	XM_011072255.2	XM_011072255	755	0	PREDICTED: Sesamum indicum aspartate-semialdehyde dehydrogenase (LOC105156186), mRNA	K00133	asd	aspartate-semialdehyde dehydrogenase	http://www.genome.jp/dbget-bin/www_bget?ko:K00133	Q55512	843	8e-89	Aspartate-semialdehyde dehydrogenase OS=Synechocystis sp. (strain PCC 6803 / Kazusa) OX=1111708 GN=asd PE=3 SV=2	PF02774//PF01118	Semialdehyde dehydrogenase, dimerisation domain//Semialdehyde dehydrogenase, NAD binding domain	GO:0008652//GO:0055114	cellular amino acid biosynthetic process//oxidation-reduction process	GO:0016620//GO:0046983//GO:0051287	oxidoreductase activity, acting on the aldehyde or oxo group of donors, NAD or NADP as acceptor//protein dimerization activity//NAD binding	--	--	KOG4777	Aspartate-semialdehyde dehydrogenase	UP	1.83772	0.000236023	FALSE	0.459036	0.570091	UP	2.18594	4.87e-06	FALSE	1.23919	0.0210799	UP	1.64814	0.000786003
Cluster-11149.10207	0.69	2.01	4.49	2.67	1.02	376	848933107	XP_012829308.1	155	2.9e-08	PREDICTED: NADPH:adrenodoxin oxidoreductase, mitochondrial [Erythranthe guttata]	--	--	--	--	--	K18914	FDXR	adrenodoxin-NADP+ reductase	http://www.genome.jp/dbget-bin/www_bget?ko:K18914	--	--	--	--	PF07992	Pyridine nucleotide-disulphide oxidoreductase	GO:0055114	oxidation-reduction process	GO:0016491	oxidoreductase activity	--	--	--	--	FALSE	-0.148459	1	FALSE	0.96556	0.875047	FALSE	0.707516	0.92366	FALSE	-1.28049	0.841577	FALSE	-0.361866	1
Cluster-11149.29089	17.81	21.01	34.47	12.48	8.13	1701	848852412	XP_012839454.1	796	6.2e-82	PREDICTED: probable NAD(P)H dehydrogenase (quinone) FQR1-like 3 isoform X2 [Erythranthe guttata]	XM_020694356.1	XM_020694356	314	5.56e-161	PREDICTED: Sesamum indicum probable NAD(P)H dehydrogenase (quinone) FQR1-like 3 (LOC105165173), transcript variant X10, mRNA	K03809	wrbA	NAD(P)H dehydrogenase (quinone)	http://www.genome.jp/dbget-bin/www_bget?ko:K03809	Q9LUX9	682	3.9e-70	Probable NAD(P)H dehydrogenase (quinone) FQR1-like 3 OS=Arabidopsis thaliana OX=3702 GN=At5g58800 PE=2 SV=1	PF03358//PF00258	NADPH-dependent FMN reductase//Flavodoxin	--	--	GO:0010181//GO:0016491	FMN binding//oxidoreductase activity	--	--	KOG3135	1,4-benzoquinone reductase-like; Trp repressor binding protein-like/protoplast-secreted protein	FALSE	0.954608	0.108438	FALSE	0.222073	0.901696	FALSE	1.06589	0.0376684	FALSE	1.18718	0.02985	FALSE	1.35919	0.00689712
Cluster-11149.21359	4.06	13.5	16.55	9.91	3.93	1969	747063965	XP_011078550.1	2199	1.5e-244	probable flavin-containing monooxygenase 1 [Sesamum indicum]	XM_011080251.2	XM_011080251	634	0	PREDICTED: Sesamum indicum probable flavin-containing monooxygenase 1 (LOC105162257), mRNA	K00485	FMO	dimethylaniline monooxygenase (N-oxide forming)	http://www.genome.jp/dbget-bin/www_bget?ko:K00485	Q9LMA1	1049	1.3e-112	Probable flavin-containing monooxygenase 1 OS=Arabidopsis thaliana OX=3702 GN=FMO1 PE=2 SV=1	PF07992//PF01593//PF01266//PF00743	Pyridine nucleotide-disulphide oxidoreductase//Flavin containing amine oxidoreductase//FAD dependent oxidoreductase//Flavin-binding monooxygenase-like	GO:0055114	oxidation-reduction process	GO:0016491//GO:0050661//GO:0050660//GO:0004499	oxidoreductase activity//NADP binding//flavin adenine dinucleotide binding//N,N-dimethylaniline monooxygenase activity	--	--	KOG1399	Flavin-containing monooxygenase	FALSE	0.647182	0.372482	FALSE	0.938474	0.12063	UP	1.47485	0.00349142	FALSE	-0.612314	0.393089	FALSE	0.276115	0.752675
Cluster-11149.10828	16.76	13.46	21.29	15.26	5.28	667	747093942	XP_011094795.1	671	7.6e-68	UDP-glucuronic acid decarboxylase 1 [Sesamum indicum]	XM_011096493.2	XM_011096493	254	4.77e-128	PREDICTED: Sesamum indicum UDP-glucuronic acid decarboxylase 1 (LOC105174398), mRNA	K08678	UXS1, uxs	UDP-glucuronate decarboxylase	http://www.genome.jp/dbget-bin/www_bget?ko:K08678	Q8VZC0	513	6e-51	UDP-glucuronic acid decarboxylase 1 OS=Arabidopsis thaliana OX=3702 GN=UXS1 PE=1 SV=1	PF01073//PF01370	3-beta hydroxysteroid dehydrogenase/isomerase family//NAD dependent epimerase/dehydratase family	GO:0008207//GO:0055114//GO:0008209//GO:0008210//GO:0006694	C21-steroid hormone metabolic process//oxidation-reduction process//androgen metabolic process//estrogen metabolic process//steroid biosynthetic process	GO:0016616//GO:0003824//GO:0003854//GO:0050662	oxidoreductase activity, acting on the CH-OH group of donors, NAD or NADP as acceptor//catalytic activity//3-beta-hydroxy-delta5-steroid dehydrogenase activity//obsolete coenzyme binding	--	--	KOG1429	dTDP-glucose 4-6-dehydratase/UDP-glucuronic acid decarboxylase	FALSE	0.0350598	1	FALSE	1.13011	0.0828464	FALSE	1.05439	0.0749111	FALSE	0.798565	0.236831	UP	1.87818	0.000513143
Cluster-11149.22590	9	15.22	16.97	8.3	4.4	1882	1276253590	PIN11804.1	1834	3e-202	UDP-glucose 4-epimerase/UDP-sulfoquinovose synthase [Handroanthus impetiginosus]	XM_011095059.2	XM_011095059	901	0	PREDICTED: Sesamum indicum UDP-glucuronate 4-epimerase 3-like (LOC105173354), mRNA	K08679	E5.1.3.6	UDP-glucuronate 4-epimerase	http://www.genome.jp/dbget-bin/www_bget?ko:K08679	O81312	1630	5.1e-180	UDP-glucuronate 4-epimerase 3 OS=Arabidopsis thaliana OX=3702 GN=GAE3 PE=2 SV=1	PF01370//PF01073	NAD dependent epimerase/dehydratase family//3-beta hydroxysteroid dehydrogenase/isomerase family	GO:0055114//GO:0008207//GO:0008209//GO:0006694//GO:0008210	oxidation-reduction process//C21-steroid hormone metabolic process//androgen metabolic process//steroid biosynthetic process//estrogen metabolic process	GO:0003824//GO:0016616//GO:0003854//GO:0050662	catalytic activity//oxidoreductase activity, acting on the CH-OH group of donors, NAD or NADP as acceptor//3-beta-hydroxy-delta5-steroid dehydrogenase activity//obsolete coenzyme binding	--	--	KOG1371	UDP-glucose 4-epimerase/UDP-sulfoquinovose synthase	FALSE	1.07671	0.0636878	FALSE	0.517799	0.52521	UP	1.4837	0.00314172	FALSE	0.791355	0.21845	FALSE	1.25904	0.0158209
Cluster-11149.30373	44.99	60.5	177.81	67.87	49.76	1030	1527473898	XP_027094764.1	1081	3.3e-115	cinnamoyl-CoA reductase 1-like [Coffea arabica]	XM_012989211.1	XM_012989211	450	0	PREDICTED: Erythranthe guttatus cinnamoyl-CoA reductase 1-like (LOC105964707), mRNA	-	-	-	http://www.genome.jp/dbget-bin/www_bget?ko:-	Q500U8	644	6e-66	Tetraketide alpha-pyrone reductase 1 OS=Arabidopsis thaliana OX=3702 GN=TKPR1 PE=1 SV=1	PF01370//PF02113//PF01073//PF14554	NAD dependent epimerase/dehydratase family//D-Ala-D-Ala carboxypeptidase 3 (S13) family//3-beta hydroxysteroid dehydrogenase/isomerase family//VEGF heparin-binding domain	GO:0008210//GO:0006694//GO:0008209//GO:0008207//GO:0055114//GO:0006508	estrogen metabolic process//steroid biosynthetic process//androgen metabolic process//C21-steroid hormone metabolic process//oxidation-reduction process//proteolysis	GO:0050662//GO:0003854//GO:0008201//GO:0016616//GO:0004185//GO:0003824	obsolete coenzyme binding//3-beta-hydroxy-delta5-steroid dehydrogenase activity//heparin binding//oxidoreductase activity, acting on the CH-OH group of donors, NAD or NADP as acceptor//serine-type carboxypeptidase activity//catalytic activity	--	--	--	--	FALSE	0.0415035	1	FALSE	0.0497924	1	FALSE	-0.0194754	1	FALSE	0.0771465	1	FALSE	0.0769339	1
Cluster-11149.23216	60.79	41.42	66.1	19.79	18.84	1568	604301877	EYU21463.1	1492	1.1e-162	hypothetical protein MIMGU_mgv1a008651mg [Erythranthe guttata]	XM_013000872.1	XM_013000872	652	0	PREDICTED: Erythranthe guttatus hydroxyphenylpyruvate reductase (LOC105975669), mRNA	K15919	HPR2	hydroxypyruvate reductase 2	http://www.genome.jp/dbget-bin/www_bget?ko:K15919	Q65CJ7	1364	3e-149	Hydroxyphenylpyruvate reductase OS=Plectranthus scutellarioides OX=4142 GN=HPPR PE=1 SV=2	PF03446//PF02826//PF00389	NAD binding domain of 6-phosphogluconate dehydrogenase//D-isomer specific 2-hydroxyacid dehydrogenase, NAD binding domain//D-isomer specific 2-hydroxyacid dehydrogenase, catalytic domain	GO:0055114	oxidation-reduction process	GO:0016616//GO:0050661//GO:0051287	oxidoreductase activity, acting on the CH-OH group of donors, NAD or NADP as acceptor//NADP binding//NAD binding	--	--	KOG0069	Glyoxylate/hydroxypyruvate reductase (D-isomer-specific 2-hydroxy acid dehydrogenase superfamily)	FALSE	1.26839	0.0186173	FALSE	-0.325545	0.753024	FALSE	0.83205	0.115053	UP	2.29171	2.35e-06	UP	1.91612	6.03e-05
Cluster-11149.35656	7.75	11.05	12.96	9.72	3.8	1916	1276239720	PIN01483.1	1011	8.2e-107	Flavonol reductase/cinnamoyl-CoA reductase [Handroanthus impetiginosus]	XM_011100162.2	XM_011100162	399	0	PREDICTED: Sesamum indicum cinnamoyl-CoA reductase-like SNL6 (LOC105177124), transcript variant X1, mRNA	-	-	-	http://www.genome.jp/dbget-bin/www_bget?ko:-	Q0JKZ0	468	2.9e-45	Cinnamoyl-CoA reductase-like SNL6 OS=Oryza sativa subsp. japonica OX=39947 GN=SNL6 PE=3 SV=1	PF01370//PF01073	NAD dependent epimerase/dehydratase family//3-beta hydroxysteroid dehydrogenase/isomerase family	GO:0008207//GO:0055114//GO:0008209//GO:0006694//GO:0008210	C21-steroid hormone metabolic process//oxidation-reduction process//androgen metabolic process//steroid biosynthetic process//estrogen metabolic process	GO:0003824//GO:0016616//GO:0003854//GO:0050662	catalytic activity//oxidoreductase activity, acting on the CH-OH group of donors, NAD or NADP as acceptor//3-beta-hydroxy-delta5-steroid dehydrogenase activity//obsolete coenzyme binding	--	--	--	--	FALSE	0.386149	0.709784	FALSE	0.96017	0.111803	FALSE	1.23553	0.0170609	FALSE	0.346827	0.772418	FALSE	1.25686	0.017272
Cluster-11149.44230	2.22	2.24	2.95	1.36	0.9	1643	747059830	XP_011076316.1	1817	2.4e-200	UDP-glucuronate 4-epimerase 3-like [Sesamum indicum]	XM_018654750.1	XM_018654750	303	7e-155	PREDICTED: Brassica rapa UDP-glucuronate 4-epimerase 5 (LOC103839899), transcript variant X2, mRNA >ref|XM_018654751.1| PREDICTED: Brassica rapa UDP-glucuronate 4-epimerase 5 (LOC103839899), transcript variant X3, mRNA	K08679	E5.1.3.6	UDP-glucuronate 4-epimerase	http://www.genome.jp/dbget-bin/www_bget?ko:K08679	Q9LPC1	1493	3.4e-164	UDP-glucuronate 4-epimerase 2 OS=Arabidopsis thaliana OX=3702 GN=GAE2 PE=2 SV=1	PF01370//PF01073//PF13333	NAD dependent epimerase/dehydratase family//3-beta hydroxysteroid dehydrogenase/isomerase family//Integrase core domain	GO:0008207//GO:0055114//GO:0008210//GO:0006694//GO:0015074//GO:0008209	C21-steroid hormone metabolic process//oxidation-reduction process//estrogen metabolic process//steroid biosynthetic process//DNA integration//androgen metabolic process	GO:0003854//GO:0003824//GO:0016616//GO:0050662	3-beta-hydroxy-delta5-steroid dehydrogenase activity//catalytic activity//oxidoreductase activity, acting on the CH-OH group of donors, NAD or NADP as acceptor//obsolete coenzyme binding	--	--	KOG1371	UDP-glucose 4-epimerase/UDP-sulfoquinovose synthase	FALSE	0.919744	0.240853	FALSE	0.208509	1	FALSE	1.0174	0.131009	FALSE	1.37423	0.0380016	FALSE	1.53212	0.0155251
Cluster-11149.23603	116.27	135.33	173.13	161.42	53.29	1490	1276238980	PIN00981.1	1578	1.1e-172	dTDP-glucose 4-6-dehydratase/UDP-glucuronic acid decarboxylase [Handroanthus impetiginosus]	XM_011090520.2	XM_011090520	698	0	PREDICTED: Sesamum indicum UDP-D-apiose/UDP-D-xylose synthase 2 (LOC105169967), mRNA	-	-	-	http://www.genome.jp/dbget-bin/www_bget?ko:-	Q9SGE0	1519	3e-167	UDP-D-apiose/UDP-D-xylose synthase 2 OS=Arabidopsis thaliana OX=3702 GN=AXS2 PE=2 SV=1	PF01073//PF01370//PF03721//PF03435	3-beta hydroxysteroid dehydrogenase/isomerase family//NAD dependent epimerase/dehydratase family//UDP-glucose/GDP-mannose dehydrogenase family, NAD binding domain//Saccharopine dehydrogenase NADP binding domain	GO:0008209//GO:0006694//GO:0008210//GO:0008207//GO:0055114	androgen metabolic process//steroid biosynthetic process//estrogen metabolic process//C21-steroid hormone metabolic process//oxidation-reduction process	GO:0050662//GO:0003824//GO:0016616//GO:0051287//GO:0016491//GO:0003854	obsolete coenzyme binding//catalytic activity//oxidoreductase activity, acting on the CH-OH group of donors, NAD or NADP as acceptor//NAD binding//oxidoreductase activity//3-beta-hydroxy-delta5-steroid dehydrogenase activity	--	--	KOG1429	dTDP-glucose 4-6-dehydratase/UDP-glucuronic acid decarboxylase	FALSE	-0.0506216	1	FALSE	1.20197	0.0234343	FALSE	1.04056	0.0376684	FALSE	0.199714	0.936045	FALSE	1.35166	0.00575434
Cluster-11149.20484	41.33	59.07	66.11	30.98	21.03	1854	848848377	XP_012845326.1	661	3e-66	PREDICTED: glyoxylate/succinic semialdehyde reductase 1 isoform X1 [Erythranthe guttata]	XM_011082288.2	XM_011082288	333	1.67e-171	PREDICTED: Sesamum indicum glyoxylate/succinic semialdehyde reductase 1 (LOC105163806), mRNA	K18121	GLYR	glyoxylate/succinic semialdehyde reductase [EC:1.1.1.79 1.1.1.-]	http://www.genome.jp/dbget-bin/www_bget?ko:K18121	Q9LSV0	588	3.4e-59	Glyoxylate/succinic semialdehyde reductase 1 OS=Arabidopsis thaliana OX=3702 GN=GLYR1 PE=1 SV=1	PF02737//PF02826//PF03446//PF14833//PF03435	3-hydroxyacyl-CoA dehydrogenase, NAD binding domain//D-isomer specific 2-hydroxyacid dehydrogenase, NAD binding domain//NAD binding domain of 6-phosphogluconate dehydrogenase//NAD-binding of NADP-dependent 3-hydroxyisobutyrate dehydrogenase//Saccharopine dehydrogenase NADP binding domain	GO:0006633//GO:0018874//GO:0006631//GO:0006550//GO:0006568//GO:0006552//GO:0006574//GO:0006554//GO:0055114	fatty acid biosynthetic process//benzoate metabolic process//fatty acid metabolic process//isoleucine catabolic process//tryptophan metabolic process//leucine catabolic process//valine catabolic process//lysine catabolic process//oxidation-reduction process	GO:0003857//GO:0050661//GO:0016491//GO:0051287	3-hydroxyacyl-CoA dehydrogenase activity//NADP binding//oxidoreductase activity//NAD binding	--	--	KOG0409	Predicted dehydrogenase	FALSE	1.13316	0.0404353	FALSE	0.162745	0.96505	FALSE	1.18511	0.016734	FALSE	1.0899	0.0472701	FALSE	1.20262	0.0161349
Cluster-11149.11453	4.98	21.51	13.98	10.03	4.54	1417	1350265468	XP_024024010.1	606	5.5e-60	mitotic spindle checkpoint protein MAD2 isoform X1 [Morus notabilis]	XM_011088428.2	XM_011088428	298	3.62e-152	PREDICTED: Sesamum indicum mitotic spindle checkpoint protein MAD2 (LOC105168368), mRNA	K02537	MAD2	mitotic spindle assembly checkpoint protein MAD2	http://www.genome.jp/dbget-bin/www_bget?ko:K02537	Q9LU93	543	4.2e-54	Mitotic spindle checkpoint protein MAD2 OS=Arabidopsis thaliana OX=3702 GN=MAD2 PE=1 SV=1	PF01210//PF10033	NAD-dependent glycerol-3-phosphate dehydrogenase N-terminus//Autophagy-related protein 13	GO:0055114//GO:0006914//GO:0046168	oxidation-reduction process//autophagy//glycerol-3-phosphate catabolic process	GO:0016616//GO:0051287	oxidoreductase activity, acting on the CH-OH group of donors, NAD or NADP as acceptor//NAD binding	GO:1990316	Atg1/ULK1 kinase complex	KOG3285	Spindle assembly checkpoint protein	FALSE	1.30494	0.0167985	FALSE	0.746074	0.277346	UP	1.94018	8.95e-05	FALSE	-0.336215	0.806498	FALSE	0.359799	0.655251
Cluster-11149.35637	0.05	0.57	3.11	1.7	1.03	1171	747073416	XP_011083667.1	1267	1e-136	isoflavone reductase-like protein [Sesamum indicum]	EF626802.1	EF626802	357	0	Fraxinus excelsior Fra e 12.01 allergen mRNA, complete cds	-	-	-	http://www.genome.jp/dbget-bin/www_bget?ko:-	E1U332	1185	1.3e-128	Isoflavone reductase-like protein OS=Olea europaea OX=4146 PE=1 SV=1	PF02254//PF01370//PF01073//PF03435//PF01118	TrkA-N domain//NAD dependent epimerase/dehydratase family//3-beta hydroxysteroid dehydrogenase/isomerase family//Saccharopine dehydrogenase NADP binding domain//Semialdehyde dehydrogenase, NAD binding domain	GO:0006694//GO:0008210//GO:0008209//GO:0006813//GO:0008207//GO:0055114	steroid biosynthetic process//estrogen metabolic process//androgen metabolic process//potassium ion transport//C21-steroid hormone metabolic process//oxidation-reduction process	GO:0016620//GO:0050662//GO:0051287//GO:0003854//GO:0016491//GO:0003824//GO:0016616	oxidoreductase activity, acting on the aldehyde or oxo group of donors, NAD or NADP as acceptor//obsolete coenzyme binding//NAD binding//3-beta-hydroxy-delta5-steroid dehydrogenase activity//oxidoreductase activity//catalytic activity//oxidoreductase activity, acting on the CH-OH group of donors, NAD or NADP as acceptor	--	--	--	--	FALSE	-1.3523	0.137403	FALSE	0.323966	0.924529	FALSE	-1.13706	0.24251	DOWN	-4.40377	0.000319432	DOWN	-4.10502	0.000933103
Cluster-11149.14893	9.63	14.57	19.56	13.46	6.78	2236	747044738	XP_011090567.1	1974	2.1e-218	UDP-glucuronate 4-epimerase 3 [Sesamum indicum]	XM_011092265.2	XM_011092265	904	0	PREDICTED: Sesamum indicum UDP-glucuronate 4-epimerase 3 (LOC105171224), transcript variant X2, mRNA	K08679	E5.1.3.6	UDP-glucuronate 4-epimerase	http://www.genome.jp/dbget-bin/www_bget?ko:K08679	O81312	1763	2.3e-195	UDP-glucuronate 4-epimerase 3 OS=Arabidopsis thaliana OX=3702 GN=GAE3 PE=2 SV=1	PF01370//PF01073	NAD dependent epimerase/dehydratase family//3-beta hydroxysteroid dehydrogenase/isomerase family	GO:0008209//GO:0008210//GO:0006694//GO:0008207//GO:0055114	androgen metabolic process//estrogen metabolic process//steroid biosynthetic process//C21-steroid hormone metabolic process//oxidation-reduction process	GO:0050662//GO:0016616//GO:0003824//GO:0003854	obsolete coenzyme binding//oxidoreductase activity, acting on the CH-OH group of donors, NAD or NADP as acceptor//catalytic activity//3-beta-hydroxy-delta5-steroid dehydrogenase activity	--	--	KOG1371	UDP-glucose 4-epimerase/UDP-sulfoquinovose synthase	FALSE	0.31526	0.816453	FALSE	0.593506	0.393061	FALSE	0.797987	0.143606	FALSE	0.191082	0.956796	FALSE	0.734542	0.190043
Cluster-11149.29497	3.81	4.81	4.81	2.46	1.67	2593	848881235	XP_012840984.1	280	6.4e-22	PREDICTED: NADPH-dependent diflavin oxidoreductase 1 [Erythranthe guttata]	XM_020697927.1	XM_020697927	120	5.96e-53	PREDICTED: Sesamum indicum NADPH-dependent diflavin oxidoreductase 1 (LOC105174089), transcript variant X3, mRNA	-	-	-	http://www.genome.jp/dbget-bin/www_bget?ko:-	Q9C6L5	144	1.4e-07	3-ketoacyl-CoA synthase 5 OS=Arabidopsis thaliana OX=3702 GN=KCS5 PE=2 SV=1	PF08392//PF17136	FAE1/Type III polyketide synthase-like protein//Ribosomal proteins 50S L24/mitochondrial 39S L24	GO:0006412//GO:0042254//GO:0006633	translation//ribosome biogenesis//fatty acid biosynthetic process	GO:0016747//GO:0003735	transferase activity, transferring acyl groups other than amino-acyl groups//structural constituent of ribosome	GO:0005840//GO:0016020	ribosome//membrane	--	--	FALSE	1.16671	0.0501264	FALSE	0.163722	1	FALSE	1.2196	0.0233754	FALSE	1.30464	0.0209514	FALSE	1.41818	0.00778832
Cluster-11149.24212	80.54	136.58	148.65	91.46	52.37	1788	747100318	XP_011098245.1	1093	2.4e-116	malate dehydrogenase, mitochondrial [Sesamum indicum]	XM_011084444.2	XM_011084444	461	0	PREDICTED: Sesamum indicum malate dehydrogenase, mitochondrial (LOC105165433), mRNA	K00026	MDH2	malate dehydrogenase	http://www.genome.jp/dbget-bin/www_bget?ko:K00026	P17783	1027	4e-110	Malate dehydrogenase, mitochondrial OS=Citrullus lanatus OX=3654 GN=MMDH PE=1 SV=1	PF01113//PF02605//PF01073//PF00056//PF02056//PF02866//PF01118	Dihydrodipicolinate reductase, N-terminus//Photosystem I reaction centre subunit XI//3-beta hydroxysteroid dehydrogenase/isomerase family//lactate/malate dehydrogenase, NAD binding domain//Family 4 glycosyl hydrolase//lactate/malate dehydrogenase, alpha/beta C-terminal domain//Semialdehyde dehydrogenase, NAD binding domain	GO:0055114//GO:0008207//GO:0015979//GO:0005975//GO:0008209//GO:0009085//GO:0006694//GO:0008210//GO:0009089	oxidation-reduction process//C21-steroid hormone metabolic process//photosynthesis//carbohydrate metabolic process//androgen metabolic process//lysine biosynthetic process//steroid biosynthetic process//estrogen metabolic process//lysine biosynthetic process via diaminopimelate	GO:0051287//GO:0016620//GO:0004553//GO:0016491//GO:0003854//GO:0008839//GO:0016616	NAD binding//oxidoreductase activity, acting on the aldehyde or oxo group of donors, NAD or NADP as acceptor//hydrolase activity, hydrolyzing O-glycosyl compounds//oxidoreductase activity//3-beta-hydroxy-delta5-steroid dehydrogenase activity//4-hydroxy-tetrahydrodipicolinate reductase//oxidoreductase activity, acting on the CH-OH group of donors, NAD or NADP as acceptor	GO:0009522//GO:0009538	photosystem I//photosystem I reaction center	KOG1494	NAD-dependent malate dehydrogenase	FALSE	0.78093	0.214013	FALSE	0.407962	0.622538	FALSE	1.07811	0.0304283	FALSE	0.490492	0.536096	FALSE	0.848438	0.104316
Cluster-11149.6246	9.38	3.15	1.01	0.7	0.36	370	1276265601	PIN21834.1	423	2.4e-39	NADP-dependent isocitrate dehydrogenase [Handroanthus impetiginosus]	XM_023010763.1	XM_023010763	85	2.24e-34	PREDICTED: Olea europaea var. sylvestris isocitrate dehydrogenase [NADP]-like (LOC111386299), mRNA	K00031	IDH1, IDH2, icd	isocitrate dehydrogenase	http://www.genome.jp/dbget-bin/www_bget?ko:K00031	Q8LPJ5	230	2.2e-18	Isocitrate dehydrogenase [NADP], chloroplastic/mitochondrial OS=Arabidopsis thaliana OX=3702 GN=At5g14590 PE=1 SV=1	PF00180	Isocitrate/isopropylmalate dehydrogenase	GO:0055114	oxidation-reduction process	GO:0016616	oxidoreductase activity, acting on the CH-OH group of donors, NAD or NADP as acceptor	--	--	KOG1526	NADP-dependent isocitrate dehydrogenase	FALSE	2.35675	0.221535	FALSE	0.528852	1	FALSE	2.76535	0.134513	UP	4.2781	4.94e-05	UP	4.73027	7.85e-05
Cluster-11149.12540	4.22	12.38	9.84	8.37	3.73	1577	1276243222	PIN03925.1	1601	2.6e-175	Homoserine dehydrogenase [Handroanthus impetiginosus]	XM_011091947.2	XM_011091947	763	0	PREDICTED: Sesamum indicum bifunctional aspartokinase/homoserine dehydrogenase 1 (LOC105170972), mRNA	-	-	-	http://www.genome.jp/dbget-bin/www_bget?ko:-	P27725	472	8.1e-46	Bifunctional aspartokinase/homoserine dehydrogenase 1 OS=Serratia marcescens OX=615 GN=thrA PE=3 SV=1	PF00742//PF03447//PF07855	Homoserine dehydrogenase//Homoserine dehydrogenase, NAD binding domain//Autophagy-related protein 101	GO:0006520//GO:0006914//GO:0055114	cellular amino acid metabolic process//autophagy//oxidation-reduction process	GO:0050661//GO:0016491	NADP binding//oxidoreductase activity	--	--	KOG0455	Homoserine dehydrogenase	FALSE	0.767714	0.246982	FALSE	0.768228	0.266489	FALSE	1.42513	0.00586292	FALSE	-0.315034	0.806498	FALSE	0.403123	0.601146
Cluster-11149.17581	4.43	9.43	12.07	4.71	4.65	2701	747060357	XP_011076606.1	905	2.2e-94	uncharacterized protein LOC105160811 [Sesamum indicum]	XM_013003210.1	XM_013003210	317	1.91e-162	PREDICTED: Erythranthe guttatus uncharacterized LOC105977830 (LOC105977830), mRNA	-	-	-	http://www.genome.jp/dbget-bin/www_bget?ko:-	Q9LDD5	232	9.3e-18	5-amino-6-(5-phospho-D-ribitylamino)uracil phosphatase, chloroplastic OS=Arabidopsis thaliana OX=3702 GN=PYRP2 PE=1 SV=1	PF01210	NAD-dependent glycerol-3-phosphate dehydrogenase N-terminus	GO:0046168//GO:0055114	glycerol-3-phosphate catabolic process//oxidation-reduction process	GO:0051287//GO:0016616	NAD binding//oxidoreductase activity, acting on the CH-OH group of donors, NAD or NADP as acceptor	--	--	--	--	FALSE	1.20165	0.0323334	FALSE	-0.376292	0.701999	FALSE	0.714562	0.201886	FALSE	0.586607	0.427034	FALSE	0.160327	0.916791
Cluster-11149.24656	17.17	30.51	27.61	20.97	10.82	1904	604298849	EYU18819.1	789	4.5e-81	hypothetical protein MIMGU_mgv1a010012mg [Erythranthe guttata]	XM_011090979.2	XM_011090979	313	2.24e-160	PREDICTED: Sesamum indicum cinnamoyl-CoA reductase 1 (LOC105170287), mRNA	-	-	-	http://www.genome.jp/dbget-bin/www_bget?ko:-	Q9S9N9	349	1.8e-31	Cinnamoyl-CoA reductase 1 OS=Arabidopsis thaliana OX=3702 GN=CCR1 PE=1 SV=1	PF01370//PF01073	NAD dependent epimerase/dehydratase family//3-beta hydroxysteroid dehydrogenase/isomerase family	GO:0006694//GO:0008210//GO:0008209//GO:0055114//GO:0008207	steroid biosynthetic process//estrogen metabolic process//androgen metabolic process//oxidation-reduction process//C21-steroid hormone metabolic process	GO:0050662//GO:0003854//GO:0016616//GO:0003824	obsolete coenzyme binding//3-beta-hydroxy-delta5-steroid dehydrogenase activity//oxidoreductase activity, acting on the CH-OH group of donors, NAD or NADP as acceptor//catalytic activity	--	--	--	--	FALSE	0.743273	0.246039	FALSE	0.557788	0.436661	FALSE	1.19027	0.0171206	FALSE	0.386396	0.701526	FALSE	0.894143	0.093649
Cluster-11149.20367	10.89	14.21	23	16.22	9.05	3020	747070401	XP_011082022.1	726	1.4e-73	uncharacterized protein At1g32220, chloroplastic isoform X1 [Sesamum indicum]	XM_011083720.2	XM_011083720	308	2.16e-157	PREDICTED: Sesamum indicum uncharacterized protein At1g32220, chloroplastic (LOC105164901), transcript variant X1, mRNA	-	-	-	http://www.genome.jp/dbget-bin/www_bget?ko:-	Q9FVR6	280	2.8e-23	Uncharacterized protein At1g32220, chloroplastic OS=Arabidopsis thaliana OX=3702 GN=At1g32220 PE=1 SV=1	PF01370//PF12165//PF01073	NAD dependent epimerase/dehydratase family//Alfin//3-beta hydroxysteroid dehydrogenase/isomerase family	GO:0008207//GO:0055114//GO:0006355//GO:0008209//GO:0008210//GO:0006694	C21-steroid hormone metabolic process//oxidation-reduction process//regulation of transcription, DNA-templated//androgen metabolic process//estrogen metabolic process//steroid biosynthetic process	GO:0016616//GO:0003824//GO:0003854//GO:0042393//GO:0050662	oxidoreductase activity, acting on the CH-OH group of donors, NAD or NADP as acceptor//catalytic activity//3-beta-hydroxy-delta5-steroid dehydrogenase activity//histone binding//obsolete coenzyme binding	--	--	KOG4288	Predicted oxidoreductase	FALSE	0.010048	1	FALSE	0.445921	0.577154	FALSE	0.345197	0.619214	FALSE	0.101504	1	FALSE	0.497404	0.430501
Cluster-11149.18070	5.52	12.68	10.14	7.2	4.06	1639	848896517	XP_012848315.1	1497	3.1e-163	PREDICTED: formate dehydrogenase, mitochondrial [Erythranthe guttata]	XM_011076650.2	XM_011076650	620	0	PREDICTED: Sesamum indicum D-3-phosphoglycerate dehydrogenase (LOC105159544), transcript variant X1, mRNA	-	-	-	http://www.genome.jp/dbget-bin/www_bget?ko:-	O29445	325	9.3e-29	D-3-phosphoglycerate dehydrogenase OS=Archaeoglobus fulgidus (strain ATCC 49558 / VC-16 / DSM 4304 / JCM 9628 / NBRC 100126) OX=224325 GN=serA PE=3 SV=1	PF03446//PF00389//PF02254//PF02826	NAD binding domain of 6-phosphogluconate dehydrogenase//D-isomer specific 2-hydroxyacid dehydrogenase, catalytic domain//TrkA-N domain//D-isomer specific 2-hydroxyacid dehydrogenase, NAD binding domain	GO:0055114//GO:0006813	oxidation-reduction process//potassium ion transport	GO:0016616//GO:0050661//GO:0051287	oxidoreductase activity, acting on the CH-OH group of donors, NAD or NADP as acceptor//NADP binding//NAD binding	--	--	KOG0068	D-3-phosphoglycerate dehydrogenase, D-isomer-specific 2-hydroxy acid dehydrogenase superfamily	FALSE	1.0186	0.0906707	FALSE	0.430369	0.635295	FALSE	1.33816	0.00923724	FALSE	0.290217	0.808516	FALSE	0.670503	0.278772
Cluster-11149.20053	9.66	20.82	16.55	13.66	6.74	1859	1173820482	XP_020552161.1	1902	3.8e-210	probable N-acetyl-gamma-glutamyl-phosphate reductase, chloroplastic [Sesamum indicum]	XM_011090000.2	XM_011090000	865	0	PREDICTED: Sesamum indicum probable N-acetyl-gamma-glutamyl-phosphate reductase, chloroplastic (LOC105169577), transcript variant X1, mRNA	K00145	argC	N-acetyl-gamma-glutamyl-phosphate reductase	http://www.genome.jp/dbget-bin/www_bget?ko:K00145	Q93Z70	1462	1.5e-160	Probable N-acetyl-gamma-glutamyl-phosphate reductase, chloroplastic OS=Arabidopsis thaliana OX=3702 GN=At2g19940 PE=1 SV=2	PF02254//PF01370//PF01118//PF10501//PF01113//PF02774//PF03435	TrkA-N domain//NAD dependent epimerase/dehydratase family//Semialdehyde dehydrogenase, NAD binding domain//Ribosomal subunit 39S//Dihydrodipicolinate reductase, N-terminus//Semialdehyde dehydrogenase, dimerisation domain//Saccharopine dehydrogenase NADP binding domain	GO:0008652//GO:0006813//GO:0055114//GO:0009085//GO:0009089	cellular amino acid biosynthetic process//potassium ion transport//oxidation-reduction process//lysine biosynthetic process//lysine biosynthetic process via diaminopimelate	GO:0008839//GO:0003824//GO:0046983//GO:0051287//GO:0016491//GO:0050662//GO:0016620	4-hydroxy-tetrahydrodipicolinate reductase//catalytic activity//protein dimerization activity//NAD binding//oxidoreductase activity//obsolete coenzyme binding//oxidoreductase activity, acting on the aldehyde or oxo group of donors, NAD or NADP as acceptor	GO:0005739	mitochondrion	KOG4354	N-acetyl-gamma-glutamyl-phosphate reductase	FALSE	0.810361	0.201115	FALSE	0.622997	0.364744	FALSE	1.32256	0.00833073	FALSE	0.173733	0.996768	FALSE	0.746675	0.188141
Cluster-11149.4974	1.82	4.52	4.62	2.05	2.01	1530	1276260837	PIN17803.1	1554	7.1e-170	Glycerol-3-phosphate dehydrogenase/dihydroxyacetone 3-phosphate reductase [Handroanthus impetiginosus]	XM_011099049.2	XM_011099049	627	0	PREDICTED: Sesamum indicum glycerol-3-phosphate dehydrogenase [NAD(+)] (LOC105176298), mRNA	K00006	GPD1	glycerol-3-phosphate dehydrogenase (NAD+)	http://www.genome.jp/dbget-bin/www_bget?ko:K00006	P52425	1427	1.4e-156	Glycerol-3-phosphate dehydrogenase [NAD(+)] OS=Cuphea lanceolata OX=3930 GN=GPDH PE=2 SV=1	PF07479//PF01210	NAD-dependent glycerol-3-phosphate dehydrogenase C-terminus//NAD-dependent glycerol-3-phosphate dehydrogenase N-terminus	GO:0005975//GO:0046168//GO:0006072//GO:0046486//GO:0055114	carbohydrate metabolic process//glycerol-3-phosphate catabolic process//glycerol-3-phosphate metabolic process//glycerolipid metabolic process//oxidation-reduction process	GO:0051287//GO:0004367//GO:0016616	NAD binding//glycerol-3-phosphate dehydrogenase [NAD+] activity//oxidoreductase activity, acting on the CH-OH group of donors, NAD or NADP as acceptor	GO:0009331	glycerol-3-phosphate dehydrogenase complex	KOG2711	Glycerol-3-phosphate dehydrogenase/dihydroxyacetone 3-phosphate reductase	FALSE	1.34418	0.0290122	FALSE	-0.373934	0.78371	FALSE	0.859404	0.162512	FALSE	0.505391	0.677087	FALSE	0.0815671	1
Cluster-11149.30555	12.61	19.34	28.83	16.7	12.59	2670	1276256716	PIN14374.1	2347	1.4e-261	Pentafunctional AROM protein [Handroanthus impetiginosus]	XM_011073193.2	XM_011073193	994	0	PREDICTED: Sesamum indicum bifunctional 3-dehydroquinate dehydratase/shikimate dehydrogenase, chloroplastic (LOC105156928), transcript variant X2, mRNA	K13832	aroDE, DHQ-SDH	3-dehydroquinate dehydratase / shikimate dehydrogenase [EC:4.2.1.10 1.1.1.25]	http://www.genome.jp/dbget-bin/www_bget?ko:K13832	Q9SQT8	1759	7.9e-195	Bifunctional 3-dehydroquinate dehydratase/shikimate dehydrogenase, chloroplastic OS=Arabidopsis thaliana OX=3702 GN=EMB3004 PE=1 SV=1	PF08501//PF02826//PF03446//PF07992//PF01487//PF03435	Shikimate dehydrogenase substrate binding domain//D-isomer specific 2-hydroxyacid dehydrogenase, NAD binding domain//NAD binding domain of 6-phosphogluconate dehydrogenase//Pyridine nucleotide-disulphide oxidoreductase//Type I 3-dehydroquinase//Saccharopine dehydrogenase NADP binding domain	GO:0055114//GO:0006571//GO:0000162//GO:0009094	oxidation-reduction process//tyrosine biosynthetic process//tryptophan biosynthetic process//L-phenylalanine biosynthetic process	GO:0003855//GO:0004764//GO:0016491//GO:0051287//GO:0050661	3-dehydroquinate dehydratase activity//shikimate 3-dehydrogenase (NADP+) activity//oxidoreductase activity//NAD binding//NADP binding	--	--	KOG0692	Pentafunctional AROM protein	FALSE	0.412204	0.651408	FALSE	0.0122527	1	FALSE	0.31368	0.670079	FALSE	0.269533	0.821767	FALSE	0.231778	0.796605
Cluster-11149.29514	1.67	4.27	3.86	3.22	1.84	3537	747077512	XP_011085879.1	1008	3.4e-106	tRNA threonylcarbamoyladenosine dehydratase [Sesamum indicum]	XM_011087577.2	XM_011087577	487	0	PREDICTED: Sesamum indicum tRNA threonylcarbamoyladenosine dehydratase (LOC105167759), mRNA	-	-	-	http://www.genome.jp/dbget-bin/www_bget?ko:-	O13861	470	3.1e-45	tRNA threonylcarbamoyladenosine dehydratase OS=Schizosaccharomyces pombe (strain 972 / ATCC 24843) OX=284812 GN=SPAC1A6.10 PE=3 SV=1	PF02254//PF03721//PF02826//PF00899//PF03435//PF02184	TrkA-N domain//UDP-glucose/GDP-mannose dehydrogenase family, NAD binding domain//D-isomer specific 2-hydroxyacid dehydrogenase, NAD binding domain//ThiF family//Saccharopine dehydrogenase NADP binding domain//HAT (Half-A-TPR) repeat	GO:0006396//GO:0055114//GO:0006813	RNA processing//oxidation-reduction process//potassium ion transport	GO:0016491//GO:0051287//GO:0016616//GO:0008641	oxidoreductase activity//NAD binding//oxidoreductase activity, acting on the CH-OH group of donors, NAD or NADP as acceptor//ubiquitin-like modifier activating enzyme activity	--	--	KOG2017	Molybdopterin synthase sulfurylase	FALSE	0.609735	0.415357	FALSE	0.407075	0.677692	FALSE	0.906025	0.101513	FALSE	-0.269709	0.847886	FALSE	0.0873639	1
Cluster-11149.23806	65.22	125.82	105.03	77.79	35.24	3037	920714996	KOM55084.1	1014	5.8e-107	hypothetical protein LR48_Vigan10g097600 [Vigna angularis]	XM_011092781.2	XM_011092781	369	0	PREDICTED: Sesamum indicum GDP-mannose 3,5-epimerase 2-like (LOC105171617), mRNA	K10046	GME	GDP-D-mannose 3', 5'-epimerase [EC:5.1.3.18 5.1.3.-]	http://www.genome.jp/dbget-bin/www_bget?ko:K10046	Q2R1V8	960	4e-102	GDP-mannose 3,5-epimerase 2 OS=Oryza sativa subsp. japonica OX=39947 GN=GME-2 PE=2 SV=2	PF06221//PF01370//PF01073	Putative zinc finger motif, C2HC5-type//NAD dependent epimerase/dehydratase family//3-beta hydroxysteroid dehydrogenase/isomerase family	GO:0006694//GO:0008210//GO:0008209//GO:0006355//GO:0055114//GO:0008207	steroid biosynthetic process//estrogen metabolic process//androgen metabolic process//regulation of transcription, DNA-templated//oxidation-reduction process//C21-steroid hormone metabolic process	GO:0008270//GO:0050662//GO:0003854//GO:0016616//GO:0003824	zinc ion binding//obsolete coenzyme binding//3-beta-hydroxy-delta5-steroid dehydrogenase activity//oxidoreductase activity, acting on the CH-OH group of donors, NAD or NADP as acceptor//catalytic activity	GO:0005634	nucleus	KOG1429	dTDP-glucose 4-6-dehydratase/UDP-glucuronic acid decarboxylase	FALSE	0.893893	0.132147	FALSE	0.746575	0.226552	UP	1.52968	0.00137662	FALSE	0.421546	0.62591	FALSE	1.1181	0.0246955
Cluster-11149.25694	1.75	15.53	18.21	0.16	0	784	225451685	XP_002278352.1	190	5.3e-12	PREDICTED: glyceraldehyde-3-phosphate dehydrogenase A, chloroplastic [Vitis vinifera]	XM_023035062.1	XM_023035062	81	8.37e-32	PREDICTED: Olea europaea var. sylvestris glyceraldehyde-3-phosphate dehydrogenase A, chloroplastic (LOC111405940), mRNA	K05298	GAPA	glyceraldehyde-3-phosphate dehydrogenase (NADP+) (phosphorylating)	http://www.genome.jp/dbget-bin/www_bget?ko:K05298	P25856	187	4.5e-13	Glyceraldehyde-3-phosphate dehydrogenase GAPA1, chloroplastic OS=Arabidopsis thaliana OX=3702 GN=GAPA1 PE=1 SV=3	PF02800	Glyceraldehyde 3-phosphate dehydrogenase, C-terminal domain	GO:0055114	oxidation-reduction process	GO:0016620	oxidoreductase activity, acting on the aldehyde or oxo group of donors, NAD or NADP as acceptor	--	--	KOG0657	Glyceraldehyde 3-phosphate dehydrogenase	UP	6.72916	7.62e-18	FALSE	3.90305	0.796404	UP	10.4312	5.88e-18	UP	4.03086	0.000258683	UP	7.56577	6.05e-05
Cluster-11149.31299	23.92	16.69	104.23	0.32	0.04	1292	1173795217	XP_020549820.1	748	1.7e-76	alcohol dehydrogenase-like 1 [Sesamum indicum]	XM_011083665.2	XM_011083665	256	7.33e-129	PREDICTED: Sesamum indicum alcohol dehydrogenase-like 1 (LOC105164860), transcript variant X2, mRNA	K00121	frmA, ADH5, adhC	S-(hydroxymethyl)glutathione dehydrogenase / alcohol dehydrogenase [EC:1.1.1.284 1.1.1.1]	http://www.genome.jp/dbget-bin/www_bget?ko:K00121	W8JWV8	657	2.3e-67	8-hydroxygeraniol oxidoreductase OS=Catharanthus roseus OX=4058 GN=8HGO PE=1 SV=1	PF02826//PF00107//PF03721//PF02254//PF08240	D-isomer specific 2-hydroxyacid dehydrogenase, NAD binding domain//Zinc-binding dehydrogenase//UDP-glucose/GDP-mannose dehydrogenase family, NAD binding domain//TrkA-N domain//Alcohol dehydrogenase GroES-like domain	GO:0055114//GO:0006813	oxidation-reduction process//potassium ion transport	GO:0051287//GO:0016616	NAD binding//oxidoreductase activity, acting on the CH-OH group of donors, NAD or NADP as acceptor	--	--	KOG0022	Alcohol dehydrogenase, class III	UP	5.86564	5.15e-20	FALSE	2.45465	0.271886	UP	8.19988	3.02e-22	UP	6.84925	2.13e-26	UP	9.2209	1.82e-28
Cluster-11149.15776	8.71	16.51	16.78	0.2	0.09	2733	1276267935	PIN23800.1	1044	1.7e-110	Flavonol reductase/cinnamoyl-CoA reductase [Handroanthus impetiginosus]	--	--	--	--	--	-	-	-	http://www.genome.jp/dbget-bin/www_bget?ko:-	Q40316	644	1.6e-65	Vestitone reductase OS=Medicago sativa OX=3879 PE=1 SV=1	PF01073//PF01370	3-beta hydroxysteroid dehydrogenase/isomerase family//NAD dependent epimerase/dehydratase family	GO:0006694//GO:0008210//GO:0008209//GO:0055114//GO:0008207	steroid biosynthetic process//estrogen metabolic process//androgen metabolic process//oxidation-reduction process//C21-steroid hormone metabolic process	GO:0050662//GO:0003854//GO:0016616//GO:0003824	obsolete coenzyme binding//3-beta-hydroxy-delta5-steroid dehydrogenase activity//oxidoreductase activity, acting on the CH-OH group of donors, NAD or NADP as acceptor//catalytic activity	--	--	--	--	UP	6.53	1.12e-26	FALSE	0.825035	0.801302	UP	7.23708	2.2e-27	UP	6.07621	3.03e-23	UP	6.84491	1.98e-24
Cluster-11149.25372	27.05	49.11	80.91	4.34	0.99	1862	1276258709	PIN16037.1	1944	5.1e-215	putative dehydrogenase [Handroanthus impetiginosus]	XM_011092545.2	XM_011092545	901	0	PREDICTED: Sesamum indicum divinyl chlorophyllide a 8-vinyl-reductase, chloroplastic (LOC105171428), mRNA	-	-	-	http://www.genome.jp/dbget-bin/www_bget?ko:-	J9RYI6	1539	1.8e-169	Divinyl chlorophyllide a 8-vinyl-reductase, chloroplastic OS=Cucumis sativus OX=3659 GN=DVR PE=1 SV=1	PF01073//PF03435//PF01113//PF01118//PF01370	3-beta hydroxysteroid dehydrogenase/isomerase family//Saccharopine dehydrogenase NADP binding domain//Dihydrodipicolinate reductase, N-terminus//Semialdehyde dehydrogenase, NAD binding domain//NAD dependent epimerase/dehydratase family	GO:0009089//GO:0008209//GO:0008210//GO:0006694//GO:0008207//GO:0055114//GO:0009085	lysine biosynthetic process via diaminopimelate//androgen metabolic process//estrogen metabolic process//steroid biosynthetic process//C21-steroid hormone metabolic process//oxidation-reduction process//lysine biosynthetic process	GO:0050662//GO:0016620//GO:0003824//GO:0008839//GO:0016616//GO:0051287//GO:0016491//GO:0003854	obsolete coenzyme binding//oxidoreductase activity, acting on the aldehyde or oxo group of donors, NAD or NADP as acceptor//catalytic activity//4-hydroxy-tetrahydrodipicolinate reductase//oxidoreductase activity, acting on the CH-OH group of donors, NAD or NADP as acceptor//NAD binding//oxidoreductase activity//3-beta-hydroxy-delta5-steroid dehydrogenase activity	--	--	--	--	UP	3.7	1.22e-13	UP	1.73803	0.00367661	UP	5.3269	9.48e-23	UP	3.31147	2.71e-11	UP	4.99856	2.79e-20
Cluster-11149.25676	550.88	529.64	1181.85	1.09	1.12	3278	747048872	XP_011070460.1	899	1.4e-93	glyceraldehyde-3-phosphate dehydrogenase A, chloroplastic [Sesamum indicum]	XM_011072158.2	XM_011072158	381	0	PREDICTED: Sesamum indicum glyceraldehyde-3-phosphate dehydrogenase A, chloroplastic (LOC105156113), mRNA	K05298	GAPA	glyceraldehyde-3-phosphate dehydrogenase (NADP+) (phosphorylating)	http://www.genome.jp/dbget-bin/www_bget?ko:K05298	P09043	892	3.3e-94	Glyceraldehyde-3-phosphate dehydrogenase A, chloroplastic (Fragment) OS=Nicotiana tabacum OX=4097 GN=GAPA PE=2 SV=1	PF02800//PF05923	Glyceraldehyde 3-phosphate dehydrogenase, C-terminal domain//APC repeat	GO:0016055//GO:0055114	Wnt signaling pathway//oxidation-reduction process	GO:0016620	oxidoreductase activity, acting on the aldehyde or oxo group of donors, NAD or NADP as acceptor	--	--	KOG0657	Glyceraldehyde 3-phosphate dehydrogenase	UP	9.12843	2.06e-50	FALSE	-0.442327	0.683603	UP	8.57507	8.36e-47	UP	9.66075	1.95e-54	UP	9.16812	5.42e-51
Cluster-11149.28755	46.69	28.7	86.86	0	0	1204	1137228115	OMO92143.1	356	4.6e-31	hypothetical protein COLO4_17836 [Corchorus olitorius]	XM_011089712.2	XM_011089712	133	1.62e-60	PREDICTED: Sesamum indicum malate dehydrogenase, glyoxysomal-like (LOC105169330), mRNA	K00026	MDH2	malate dehydrogenase	http://www.genome.jp/dbget-bin/www_bget?ko:K00026	P46488	346	2.5e-31	Malate dehydrogenase, glyoxysomal OS=Cucumis sativus OX=3659 GN=MDHG PE=2 SV=1	PF01118//PF00056	Semialdehyde dehydrogenase, NAD binding domain//lactate/malate dehydrogenase, NAD binding domain	GO:0055114	oxidation-reduction process	GO:0016491//GO:0016620//GO:0051287	oxidoreductase activity//oxidoreductase activity, acting on the aldehyde or oxo group of donors, NAD or NADP as acceptor//NAD binding	--	--	KOG1494	NAD-dependent malate dehydrogenase	UP	12.419	2.19e-30	FALSE	0	1	UP	12.1517	1.46e-27	UP	13.4128	4.15e-37	UP	13.1395	1.43e-35
Cluster-11149.12938	0.98	4.42	11.4	0	0	556	13676400	BAB41189.1	158	1.9e-08	NADPH-protochlorophyllide oxidoreductase 1, partial [Amaranthus tricolor]	--	--	--	--	--	K00218	por	protochlorophyllide reductase	http://www.genome.jp/dbget-bin/www_bget?ko:K00218	Q42536	155	1.6e-09	Protochlorophyllide reductase A, chloroplastic OS=Arabidopsis thaliana OX=3702 GN=PORA PE=1 SV=2	--	--	--	--	--	--	--	--	--	--	UP	8.09745	3.02e-06	FALSE	0	1	UP	7.83116	5.91e-06	FALSE	6.20629	0.0606833	FALSE	5.93704	0.0636174
Cluster-11149.12284	3.03	6.24	5.85	0	0	842	747096754	XP_011096311.1	587	5.2e-58	transcription factor bHLH125 [Sesamum indicum]	--	--	--	--	--	-	-	-	http://www.genome.jp/dbget-bin/www_bget?ko:-	F4JIJ7	337	1.9e-30	Transcription factor bHLH162 OS=Arabidopsis thaliana OX=3702 GN=BHLH162 PE=1 SV=1	PF01073//PF00010	3-beta hydroxysteroid dehydrogenase/isomerase family//Helix-loop-helix DNA-binding domain	GO:0055114//GO:0008207//GO:0008210//GO:0006694//GO:0008209	oxidation-reduction process//C21-steroid hormone metabolic process//estrogen metabolic process//steroid biosynthetic process//androgen metabolic process	GO:0046983//GO:0003854//GO:0016616	protein dimerization activity//3-beta-hydroxy-delta5-steroid dehydrogenase activity//oxidoreductase activity, acting on the CH-OH group of donors, NAD or NADP as acceptor	--	--	--	--	UP	9.53225	1.91e-12	FALSE	0	1	UP	9.26528	1.29e-11	UP	8.77487	1.69e-08	UP	8.50224	3.8e-08
Cluster-11149.36180	8.96	4.44	3.54	0	0	310	763790943	KJB57939.1	135	5e-06	hypothetical protein B456_009G186400 [Gossypium raimondii]	XM_011075770.2	XM_011075770	60	1.45e-20	PREDICTED: Sesamum indicum glyceraldehyde-3-phosphate dehydrogenase B, chloroplastic (LOC105158872), mRNA	K05298	GAPA	glyceraldehyde-3-phosphate dehydrogenase (NADP+) (phosphorylating)	http://www.genome.jp/dbget-bin/www_bget?ko:K05298	--	--	--	--	PF02800	Glyceraldehyde 3-phosphate dehydrogenase, C-terminal domain	GO:0055114	oxidation-reduction process	GO:0016620	oxidoreductase activity, acting on the aldehyde or oxo group of donors, NAD or NADP as acceptor	--	--	--	--	FALSE	5.96856	0.101362	FALSE	0	1	FALSE	5.70588	0.101513	UP	7.09032	0.0026444	UP	6.81921	0.00255923
Cluster-11149.20082	1.06	1.61	1.75	0	0	493	223535342	EEF37017.1	179	6.2e-11	alcohol dehydrogenase, putative [Ricinus communis]	XM_002323632.3	XM_002323632	59	8.68e-20	PREDICTED: Populus trichocarpa 2-methylene-furan-3-one reductase (LOC7472471), mRNA	K18980	EO, FaQR	2-methylene-furan-3-one reductase	http://www.genome.jp/dbget-bin/www_bget?ko:K18980	Q9ZUC1	161	2.9e-10	NADPH-dependent alkenal/one oxidoreductase, chloroplastic OS=Arabidopsis thaliana OX=3702 GN=AOR PE=1 SV=2	--	--	--	--	--	--	--	--	--	--	FALSE	6.33	0.0263893	FALSE	0	1	FALSE	6.06229	0.0376684	FALSE	5.98715	0.093697	FALSE	5.71856	0.104156
Cluster-20440.0	0.21	0.42	1.44	0	0	455	848876145	XP_012838538.1	546	1.6e-53	PREDICTED: fatty acyl-CoA reductase 1-like isoform X2 [Erythranthe guttata]	--	--	--	--	--	K13356	FAR	alcohol-forming fatty acyl-CoA reductase	http://www.genome.jp/dbget-bin/www_bget?ko:K13356	Q39152	425	6.5e-41	Fatty acyl-CoA reductase 1 OS=Arabidopsis thaliana OX=3702 GN=FAR1 PE=1 SV=1	PF03930//PF01073//PF01370	Recombinase Flp protein N-terminus//3-beta hydroxysteroid dehydrogenase/isomerase family//NAD dependent epimerase/dehydratase family	GO:0006694//GO:0008210//GO:0008209//GO:0006310//GO:0008207//GO:0055114	steroid biosynthetic process//estrogen metabolic process//androgen metabolic process//DNA recombination//C21-steroid hormone metabolic process//oxidation-reduction process	GO:0050662//GO:0003854//GO:0003824//GO:0016616	obsolete coenzyme binding//3-beta-hydroxy-delta5-steroid dehydrogenase activity//catalytic activity//oxidoreductase activity, acting on the CH-OH group of donors, NAD or NADP as acceptor	--	--	KOG1221	Acyl-CoA reductase	FALSE	4.21768	0.835728	FALSE	0	1	FALSE	3.96602	0.705108	FALSE	3.51164	1	FALSE	3.26447	1
Cluster-14178.0	0.15	2.21	0.08	0.07	0	826	604302348	EYU21924.1	1159	2.4e-124	hypothetical protein MIMGU_mgv1a024074mg [Erythranthe guttata]	XM_011083603.2	XM_011083603	400	0	PREDICTED: Sesamum indicum probable indole-3-pyruvate monooxygenase YUCCA4 (LOC105164817), mRNA	K11816	YUCCA	indole-3-pyruvate monooxygenase	http://www.genome.jp/dbget-bin/www_bget?ko:K11816	Q9LFM5	1001	1.9e-107	Probable indole-3-pyruvate monooxygenase YUCCA4 OS=Arabidopsis thaliana OX=3702 GN=YUC4 PE=1 SV=1	PF07992//PF00743	Pyridine nucleotide-disulphide oxidoreductase//Flavin-binding monooxygenase-like	GO:0055114	oxidation-reduction process	GO:0004499//GO:0016491//GO:0050661//GO:0050660	N,N-dimethylaniline monooxygenase activity//oxidoreductase activity//NADP binding//flavin adenine dinucleotide binding	--	--	--	--	UP	4.94306	5.25e-05	FALSE	2.9964	1	UP	7.73538	1.22e-05	FALSE	1.54048	1	FALSE	4.18738	0.718417
Cluster-14027.0	0	1.04	0	0	0	501	747070193	XP_011081905.1	671	5.7e-68	probable indole-3-pyruvate monooxygenase YUCCA4 [Sesamum indicum]	XM_011083603.2	XM_011083603	222	2.16e-110	PREDICTED: Sesamum indicum probable indole-3-pyruvate monooxygenase YUCCA4 (LOC105164817), mRNA	K11816	YUCCA	indole-3-pyruvate monooxygenase	http://www.genome.jp/dbget-bin/www_bget?ko:K11816	Q9LFM5	553	1e-55	Probable indole-3-pyruvate monooxygenase YUCCA4 OS=Arabidopsis thaliana OX=3702 GN=YUC4 PE=1 SV=1	PF01266//PF00743//PF01494//PF01593//PF07992	FAD dependent oxidoreductase//Flavin-binding monooxygenase-like//FAD binding domain//Flavin containing amine oxidoreductase//Pyridine nucleotide-disulphide oxidoreductase	GO:0055114	oxidation-reduction process	GO:0050660//GO:0050661//GO:0016491//GO:0071949//GO:0004499	flavin adenine dinucleotide binding//NADP binding//oxidoreductase activity//FAD binding//N,N-dimethylaniline monooxygenase activity	--	--	--	--	FALSE	5.75	0.158449	FALSE	0	1	FALSE	5.48809	0.101513	FALSE	0	1	FALSE	0	1
Cluster-16942.0	1.3	0.6	0	2.49	0	314	--	--	--	--	--	--	--	--	--	--	--	--	--	--	--	--	--	--	PF03721	UDP-glucose/GDP-mannose dehydrogenase family, NAD binding domain	GO:0055114	oxidation-reduction process	GO:0051287//GO:0016616	NAD binding//oxidoreductase activity, acting on the CH-OH group of donors, NAD or NADP as acceptor	--	--	--	--	FALSE	-1.62924	0.744832	FALSE	4.85401	0.357601	FALSE	3.0555	1	FALSE	-0.30747	1	FALSE	4.18738	0.718417
Cluster-19754.0	0	0	0	3.25	0	339	1276238968	PIN00976.1	268	2.1e-21	Glyoxylate/hydroxypyruvate reductase (D-isomer-specific 2-hydroxy acid dehydrogenase superfamily) [Handroanthus impetiginosus]	--	--	--	--	--	-	-	-	http://www.genome.jp/dbget-bin/www_bget?ko:-	Q9LE33	161	2e-10	Glyoxylate/hydroxypyruvate reductase HPR3 OS=Arabidopsis thaliana OX=3702 GN=HPR3 PE=2 SV=1	PF00389	D-isomer specific 2-hydroxyacid dehydrogenase, catalytic domain	GO:0055114	oxidation-reduction process	GO:0016616//GO:0051287	oxidoreductase activity, acting on the CH-OH group of donors, NAD or NADP as acceptor//NAD binding	--	--	--	--	FALSE	-5.70927	0.101362	FALSE	5.63983	0.144338	FALSE	0	1	FALSE	-5.5387	0.148189	FALSE	0	1
Cluster-11149.24401	203.33	190.68	644.89	0.07	0.85	1466	1024029385	KZV40842.1	1263	3.7e-136	glyceraldehyde-3-phosphate dehydrogenase B, chloroplastic-like [Dorcoceras hygrometricum]	XM_011075770.2	XM_011075770	579	0	PREDICTED: Sesamum indicum glyceraldehyde-3-phosphate dehydrogenase B, chloroplastic (LOC105158872), mRNA	K05298	GAPA	glyceraldehyde-3-phosphate dehydrogenase (NADP+) (phosphorylating)	http://www.genome.jp/dbget-bin/www_bget?ko:K05298	P12859	1242	3.9e-135	Glyceraldehyde-3-phosphate dehydrogenase B, chloroplastic OS=Pisum sativum OX=3888 GN=GAPB PE=1 SV=2	PF00044//PF13516//PF02800	Glyceraldehyde 3-phosphate dehydrogenase, NAD binding domain//Leucine Rich repeat//Glyceraldehyde 3-phosphate dehydrogenase, C-terminal domain	GO:0055114	oxidation-reduction process	GO:0005515//GO:0016620	protein binding//oxidoreductase activity, acting on the aldehyde or oxo group of donors, NAD or NADP as acceptor	--	--	KOG0657	Glyceraldehyde 3-phosphate dehydrogenase	UP	11.5314	7.35e-51	DOWN	-3.9168	0.000186106	UP	7.49878	1.57e-36	UP	12.0815	5.45e-55	UP	8.12023	1.25e-40
Cluster-11149.26560	14.57	14.45	54.76	0.07	0.18	2611	1276267609	PIN23528.1	939	2.5e-98	Alcohol dehydrogenase, class III [Handroanthus impetiginosus]	XM_011077465.2	XM_011077465	294	1.13e-149	PREDICTED: Sesamum indicum alcohol dehydrogenase class-3-like (LOC105160197), transcript variant X2, mRNA	K00121	frmA, ADH5, adhC	S-(hydroxymethyl)glutathione dehydrogenase / alcohol dehydrogenase [EC:1.1.1.284 1.1.1.1]	http://www.genome.jp/dbget-bin/www_bget?ko:K00121	A0A0C5DM37	790	1.8e-82	CYP enzymes assisting alcohol dehydrogenase OS=Catharanthus roseus OX=4058 GN=CYPADH PE=1 SV=1	PF02826//PF00107//PF08240//PF06090//PF03721	D-isomer specific 2-hydroxyacid dehydrogenase, NAD binding domain//Zinc-binding dehydrogenase//Alcohol dehydrogenase GroES-like domain//Inositol-pentakisphosphate 2-kinase//UDP-glucose/GDP-mannose dehydrogenase family, NAD binding domain	GO:0055114	oxidation-reduction process	GO:0016616//GO:0005524//GO:0051287//GO:0035299	oxidoreductase activity, acting on the CH-OH group of donors, NAD or NADP as acceptor//ATP binding//NAD binding//inositol pentakisphosphate 2-kinase activity	--	--	KOG0022	Alcohol dehydrogenase, class III	UP	7.8138	2.82e-29	FALSE	-1.71113	0.271886	UP	5.98861	1.57e-22	UP	8.29388	4.09e-32	UP	6.53261	7.44e-26
Cluster-11149.21743	4.25	7.79	6.57	0	0.05	1081	--	--	--	--	--	--	--	--	--	--	K05298	GAPA	glyceraldehyde-3-phosphate dehydrogenase (NADP+) (phosphorylating)	http://www.genome.jp/dbget-bin/www_bget?ko:K05298	P19866	126	7.3e-06	Glyceraldehyde-3-phosphate dehydrogenase A, chloroplastic OS=Spinacia oleracea OX=3562 GN=GAPA PE=1 SV=2	PF00044	Glyceraldehyde 3-phosphate dehydrogenase, NAD binding domain	GO:0055114	oxidation-reduction process	GO:0016620	oxidoreductase activity, acting on the aldehyde or oxo group of donors, NAD or NADP as acceptor	--	--	--	--	UP	10.3387	6.31e-17	FALSE	-3.3742	1	UP	6.77459	1.06e-13	UP	9.75597	3.14e-13	UP	6.40045	2.44e-11
Cluster-11149.27311	24.25	38.59	49.37	0.14	2.05	1764	604344200	EYU42999.1	1028	8e-109	hypothetical protein MIMGU_mgv1a009774mg [Erythranthe guttata]	XM_021827260.1	XM_021827260	94	1.14e-38	PREDICTED: Hevea brasiliensis cinnamoyl-CoA reductase 1-like (LOC110666682), mRNA	-	-	-	http://www.genome.jp/dbget-bin/www_bget?ko:-	Q9S9N9	559	7.4e-56	Cinnamoyl-CoA reductase 1 OS=Arabidopsis thaliana OX=3702 GN=CCR1 PE=1 SV=1	PF01370//PF01073	NAD dependent epimerase/dehydratase family//3-beta hydroxysteroid dehydrogenase/isomerase family	GO:0008209//GO:0008210//GO:0006694//GO:0055114//GO:0008207	androgen metabolic process//estrogen metabolic process//steroid biosynthetic process//oxidation-reduction process//C21-steroid hormone metabolic process	GO:0050662//GO:0016616//GO:0003824//GO:0003854	obsolete coenzyme binding//oxidoreductase activity, acting on the CH-OH group of donors, NAD or NADP as acceptor//catalytic activity//3-beta-hydroxy-delta5-steroid dehydrogenase activity	--	--	--	--	UP	8.27723	6.85e-34	DOWN	-4.23403	2.64e-08	UP	3.93039	9.06e-15	UP	8.07352	7.69e-32	UP	3.79196	9.58e-14
Cluster-11149.25865	33.59	77.81	73.32	4.61	6.12	1421	1276267936	PIN23801.1	917	4.8e-96	Flavonol reductase/cinnamoyl-CoA reductase [Handroanthus impetiginosus]	XM_002308129.3	XM_002308129	35	5.76e-06	PREDICTED: Populus trichocarpa vestitone reductase (LOC7487263), mRNA	-	-	-	http://www.genome.jp/dbget-bin/www_bget?ko:-	Q40316	633	1.6e-64	Vestitone reductase OS=Medicago sativa OX=3879 PE=1 SV=1	PF01370//PF01073	NAD dependent epimerase/dehydratase family//3-beta hydroxysteroid dehydrogenase/isomerase family	GO:0055114//GO:0008207//GO:0008209//GO:0008210//GO:0006694	oxidation-reduction process//C21-steroid hormone metabolic process//androgen metabolic process//estrogen metabolic process//steroid biosynthetic process	GO:0003824//GO:0016616//GO:0003854//GO:0050662	catalytic activity//oxidoreductase activity, acting on the CH-OH group of donors, NAD or NADP as acceptor//3-beta-hydroxy-delta5-steroid dehydrogenase activity//obsolete coenzyme binding	--	--	--	--	UP	4.28	4.56e-17	FALSE	-0.757802	0.275354	UP	3.41165	2.56e-12	UP	3.54157	1.7e-12	UP	2.73367	1.93e-08
Cluster-11149.30293	5.62	16.47	22.5	26.53	2.36	1346	747071833	XP_011082806.1	1626	2.8e-178	trifunctional UDP-glucose 4,6-dehydratase/UDP-4-keto-6-deoxy-D-glucose 3,5-epimerase/UDP-4-keto-L-rhamnose-reductase RHM1 [Sesamum indicum]	XM_011084504.2	XM_011084504	636	0	PREDICTED: Sesamum indicum trifunctional UDP-glucose 4,6-dehydratase/UDP-4-keto-6-deoxy-D-glucose 3,5-epimerase/UDP-4-keto-L-rhamnose-reductase RHM1 (LOC105165479), mRNA	K12450	RHM	UDP-glucose 4,6-dehydratase	http://www.genome.jp/dbget-bin/www_bget?ko:K12450	Q9LPG6	1590	1.6e-175	Trifunctional UDP-glucose 4,6-dehydratase/UDP-4-keto-6-deoxy-D-glucose 3,5-epimerase/UDP-4-keto-L-rhamnose-reductase RHM2 OS=Arabidopsis thaliana OX=3702 GN=RHM2 PE=1 SV=1	PF01370//PF00891//PF01073	NAD dependent epimerase/dehydratase family//O-methyltransferase domain//3-beta hydroxysteroid dehydrogenase/isomerase family	GO:0006694//GO:0008210//GO:0008209//GO:0055114//GO:0008207	steroid biosynthetic process//estrogen metabolic process//androgen metabolic process//oxidation-reduction process//C21-steroid hormone metabolic process	GO:0050662//GO:0008171//GO:0003854//GO:0003824//GO:0016616	obsolete coenzyme binding//O-methyltransferase activity//3-beta-hydroxy-delta5-steroid dehydrogenase activity//catalytic activity//oxidoreductase activity, acting on the CH-OH group of donors, NAD or NADP as acceptor	--	--	KOG0747	Putative NAD+-dependent epimerases	FALSE	-0.483557	0.566119	UP	3.09326	2.3e-09	UP	2.49883	1.04e-06	DOWN	-1.56584	0.00301172	FALSE	1.47698	0.00870306
Cluster-11149.31967	29.27	49.46	68.46	7.3	15.74	2326	1276245154	PIN05325.1	1469	7.7e-160	Alcohol dehydrogenase, class V [Handroanthus impetiginosus]	XM_019321954.1	XM_019321954	102	5.42e-43	PREDICTED: Ipomoea nil mannitol dehydrogenase-like (LOC109172720), mRNA	K00083	E1.1.1.195	cinnamyl-alcohol dehydrogenase	http://www.genome.jp/dbget-bin/www_bget?ko:K00083	Q6V4H0	1392	2.5e-152	8-hydroxygeraniol dehydrogenase OS=Catharanthus roseus OX=4058 GN=10HGO PE=1 SV=1	PF08240//PF02826//PF00107//PF03446//PF02737	Alcohol dehydrogenase GroES-like domain//D-isomer specific 2-hydroxyacid dehydrogenase, NAD binding domain//Zinc-binding dehydrogenase//NAD binding domain of 6-phosphogluconate dehydrogenase//3-hydroxyacyl-CoA dehydrogenase, NAD binding domain	GO:0006633//GO:0018874//GO:0006631//GO:0006550//GO:0006568//GO:0006552//GO:0006574//GO:0006554//GO:0055114	fatty acid biosynthetic process//benzoate metabolic process//fatty acid metabolic process//isoleucine catabolic process//tryptophan metabolic process//leucine catabolic process//valine catabolic process//lysine catabolic process//oxidation-reduction process	GO:0050661//GO:0003857//GO:0016491//GO:0051287	NADP binding//3-hydroxyacyl-CoA dehydrogenase activity//oxidoreductase activity//NAD binding	--	--	--	--	UP	2.96	1.13e-09	DOWN	-1.50404	0.00369473	FALSE	1.34591	0.00586292	UP	2.67749	3.74e-08	FALSE	1.12345	0.0256116
Cluster-11149.28698	26.08	57.52	87.32	18.57	27.85	1163	1276246359	PIN06215.1	1438	1.5e-156	hypothetical protein CDL12_21236 [Handroanthus impetiginosus]	XM_011085364.2	XM_011085364	464	0	PREDICTED: Sesamum indicum isoflavone reductase-like protein (LOC105166127), mRNA	-	-	-	http://www.genome.jp/dbget-bin/www_bget?ko:-	E1U332	1374	1.5e-150	Isoflavone reductase-like protein OS=Olea europaea OX=4146 PE=1 SV=1	PF02254//PF01118//PF01370//PF01073//PF03435	TrkA-N domain//Semialdehyde dehydrogenase, NAD binding domain//NAD dependent epimerase/dehydratase family//3-beta hydroxysteroid dehydrogenase/isomerase family//Saccharopine dehydrogenase NADP binding domain	GO:0006813//GO:0008207//GO:0055114//GO:0008209//GO:0008210//GO:0006694	potassium ion transport//C21-steroid hormone metabolic process//oxidation-reduction process//androgen metabolic process//estrogen metabolic process//steroid biosynthetic process	GO:0003824//GO:0016616//GO:0051287//GO:0003854//GO:0016491//GO:0050662//GO:0016620	catalytic activity//oxidoreductase activity, acting on the CH-OH group of donors, NAD or NADP as acceptor//NAD binding//3-beta-hydroxy-delta5-steroid dehydrogenase activity//oxidoreductase activity//obsolete coenzyme binding//oxidoreductase activity, acting on the aldehyde or oxo group of donors, NAD or NADP as acceptor	--	--	--	--	UP	1.83648	0.000245578	FALSE	-0.981507	0.089629	FALSE	0.744173	0.168672	FALSE	1.1608	0.0361243	FALSE	0.129312	0.958451
Cluster-11246.0	0	1.16	0.68	0	0.23	435	1173756324	XP_011089305.2	587	2.7e-58	indole-3-pyruvate monooxygenase YUCCA6 [Sesamum indicum]	CP032248.1	CP032248	59	7.6e-20	Gossypioides kirkii chromosome KI_06	K11816	YUCCA	indole-3-pyruvate monooxygenase	http://www.genome.jp/dbget-bin/www_bget?ko:K11816	Q9SVQ1	475	9.9e-47	Indole-3-pyruvate monooxygenase YUCCA2 OS=Arabidopsis thaliana OX=3702 GN=YUC2 PE=1 SV=1	PF00743//PF01593//PF01266//PF07992//PF01494	Flavin-binding monooxygenase-like//Flavin containing amine oxidoreductase//FAD dependent oxidoreductase//Pyridine nucleotide-disulphide oxidoreductase//FAD binding domain	GO:0055114	oxidation-reduction process	GO:0071949//GO:0016491//GO:0050661//GO:0050660//GO:0004499	FAD binding//oxidoreductase activity//NADP binding//flavin adenine dinucleotide binding//N,N-dimethylaniline monooxygenase activity	--	--	--	--	FALSE	5.49232	0.244997	FALSE	-3.3742	1	FALSE	1.93452	0.431376	FALSE	0	1	FALSE	-3.08254	1
Cluster-11149.6098	1.42	3.63	2.54	2.64	1	2181	1371521532	PSS17636.1	1612	1.9e-176	UDP-4-keto-6-deoxy-D-glucose 3,5-epimerase/UDP-4-keto-L-rhamnose 4-keto-reductase [Actinidia chinensis var. chinensis]	XM_011084633.2	XM_011084633	807	0	PREDICTED: Sesamum indicum trifunctional UDP-glucose 4,6-dehydratase/UDP-4-keto-6-deoxy-D-glucose 3,5-epimerase/UDP-4-keto-L-rhamnose-reductase RHM2-like (LOC105165578), mRNA	K12450	RHM	UDP-glucose 4,6-dehydratase	http://www.genome.jp/dbget-bin/www_bget?ko:K12450	Q9LPG6	1548	1.9e-170	Trifunctional UDP-glucose 4,6-dehydratase/UDP-4-keto-6-deoxy-D-glucose 3,5-epimerase/UDP-4-keto-L-rhamnose-reductase RHM2 OS=Arabidopsis thaliana OX=3702 GN=RHM2 PE=1 SV=1	PF01370//PF06558//PF01073//PF04319	NAD dependent epimerase/dehydratase family//Secretion monitor precursor protein (SecM)//3-beta hydroxysteroid dehydrogenase/isomerase family//NifZ domain	GO:0008207//GO:0055114//GO:0006694//GO:0008210//GO:0008209//GO:0009399	C21-steroid hormone metabolic process//oxidation-reduction process//steroid biosynthetic process//estrogen metabolic process//androgen metabolic process//nitrogen fixation	GO:0003854//GO:0045182//GO:0016616//GO:0003824//GO:0050662	3-beta-hydroxy-delta5-steroid dehydrogenase activity//translation regulator activity//oxidoreductase activity, acting on the CH-OH group of donors, NAD or NADP as acceptor//catalytic activity//obsolete coenzyme binding	--	--	KOG0747	Putative NAD+-dependent epimerases	FALSE	0.657335	0.391253	FALSE	1.00065	0.151319	FALSE	1.54712	0.00590042	FALSE	-0.217356	0.954288	FALSE	0.73299	0.299492
Cluster-11149.26411	12.28	14.58	21.13	24.82	8.84	2268	747067289	XP_011080359.1	1230	3.9e-132	cinnamoyl-CoA reductase 1 [Sesamum indicum]	XM_011091818.2	XM_011091818	332	7.35e-171	PREDICTED: Sesamum indicum cinnamoyl-CoA reductase 1-like (LOC105170895), transcript variant X2, mRNA	-	-	-	http://www.genome.jp/dbget-bin/www_bget?ko:-	Q9S9N9	711	2.2e-73	Cinnamoyl-CoA reductase 1 OS=Arabidopsis thaliana OX=3702 GN=CCR1 PE=1 SV=1	PF08272//PF01073//PF01370	Topoisomerase I zinc-ribbon-like//3-beta hydroxysteroid dehydrogenase/isomerase family//NAD dependent epimerase/dehydratase family	GO:0008207//GO:0055114//GO:0006265//GO:0006694//GO:0008210//GO:0008209	C21-steroid hormone metabolic process//oxidation-reduction process//DNA topological change//steroid biosynthetic process//estrogen metabolic process//androgen metabolic process	GO:0003854//GO:0003677//GO:0016616//GO:0003824//GO:0003917//GO:0050662	3-beta-hydroxy-delta5-steroid dehydrogenase activity//DNA binding//oxidoreductase activity, acting on the CH-OH group of donors, NAD or NADP as acceptor//catalytic activity//DNA topoisomerase type I (single strand cut, ATP-independent) activity//obsolete coenzyme binding	--	--	--	--	FALSE	-0.56576	0.448911	FALSE	1.09281	0.0474507	FALSE	0.416289	0.518859	FALSE	-0.339798	0.772492	FALSE	0.702975	0.210564
Cluster-11149.24403	49.6	57.4	107.02	43.11	50.16	3330	762060719	AJQ20637.1	2002	1.7e-221	Dihydrolipoamide Dehydrogenase [Salvia miltiorrhiza]	XM_011073050.2	XM_011073050	974	0	PREDICTED: Sesamum indicum dihydrolipoyl dehydrogenase 1, mitochondrial (LOC105156821), mRNA	K00382	DLD, lpd, pdhD	dihydrolipoamide dehydrogenase	http://www.genome.jp/dbget-bin/www_bget?ko:K00382	Q9M5K3	1886	1.9e-209	Dihydrolipoyl dehydrogenase 1, mitochondrial OS=Arabidopsis thaliana OX=3702 GN=LPD1 PE=1 SV=2	PF03721//PF02852//PF01494//PF14719//PF02737//PF07992	UDP-glucose/GDP-mannose dehydrogenase family, NAD binding domain//Pyridine nucleotide-disulphide oxidoreductase, dimerisation domain//FAD binding domain//Phosphotyrosine interaction domain (PTB/PID)//3-hydroxyacyl-CoA dehydrogenase, NAD binding domain//Pyridine nucleotide-disulphide oxidoreductase	GO:0055114//GO:0006554//GO:0006552//GO:0006568//GO:0006550//GO:0006633//GO:0045454//GO:0006574//GO:0018874//GO:0006631	oxidation-reduction process//lysine catabolic process//leucine catabolic process//tryptophan metabolic process//isoleucine catabolic process//fatty acid biosynthetic process//cell redox homeostasis//valine catabolic process//benzoate metabolic process//fatty acid metabolic process	GO:0051287//GO:0005515//GO:0016616//GO:0016491//GO:0003857//GO:0071949	NAD binding//protein binding//oxidoreductase activity, acting on the CH-OH group of donors, NAD or NADP as acceptor//oxidoreductase activity//3-hydroxyacyl-CoA dehydrogenase activity//FAD binding	--	--	KOG1335	Dihydrolipoamide dehydrogenase	FALSE	0.613044	0.380656	FALSE	-0.614373	0.357601	FALSE	-0.11211	0.962761	FALSE	0.878201	0.132909	FALSE	0.213821	0.818139
Cluster-11149.32646	22.44	51.13	30.44	33.27	14.38	1409	604335662	EYU39550.1	1572	5.3e-172	hypothetical protein MIMGU_mgv1a001504mg [Erythranthe guttata]	XM_011078746.2	XM_011078746	728	0	PREDICTED: Sesamum indicum calcium-binding mitochondrial carrier protein SCaMC-1 (LOC105161148), mRNA	-	-	-	http://www.genome.jp/dbget-bin/www_bget?ko:-	Q4V9P0	272	1.1e-22	S-adenosylmethionine mitochondrial carrier protein OS=Danio rerio OX=7955 GN=slc25a26 PE=2 SV=1	PF01073//PF07127//PF10717	3-beta hydroxysteroid dehydrogenase/isomerase family//Late nodulin protein//Occlusion-derived virus envelope protein ODV-E18	GO:0008207//GO:0055114//GO:0006694//GO:0008210//GO:0009878//GO:0008209	C21-steroid hormone metabolic process//oxidation-reduction process//steroid biosynthetic process//estrogen metabolic process//nodule morphogenesis//androgen metabolic process	GO:0003854//GO:0046872//GO:0016616	3-beta-hydroxy-delta5-steroid dehydrogenase activity//metal ion binding//oxidoreductase activity, acting on the CH-OH group of donors, NAD or NADP as acceptor	GO:0019031	viral envelope	KOG0768	Mitochondrial carrier protein PET8	FALSE	0.823808	0.182913	FALSE	0.813462	0.183354	UP	1.52647	0.00171076	FALSE	0.10454	1	FALSE	0.867956	0.104156
Cluster-11149.13810	9.13	11.91	16.13	16.56	7.77	1217	848848947	XP_012827707.1	535	8.1e-52	PREDICTED: cinnamoyl-CoA reductase 1-like [Erythranthe guttata]	XM_011082056.2	XM_011082056	244	3.23e-122	PREDICTED: Sesamum indicum cinnamoyl-CoA reductase 1 (LOC105163632), mRNA	-	-	-	http://www.genome.jp/dbget-bin/www_bget?ko:-	Q500U8	285	3e-24	Tetraketide alpha-pyrone reductase 1 OS=Arabidopsis thaliana OX=3702 GN=TKPR1 PE=1 SV=1	PF01073//PF01370	3-beta hydroxysteroid dehydrogenase/isomerase family//NAD dependent epimerase/dehydratase family	GO:0055114//GO:0008207//GO:0008210//GO:0006694//GO:0008209	oxidation-reduction process//C21-steroid hormone metabolic process//estrogen metabolic process//steroid biosynthetic process//androgen metabolic process	GO:0003854//GO:0016616//GO:0003824//GO:0050662	3-beta-hydroxy-delta5-steroid dehydrogenase activity//oxidoreductase activity, acting on the CH-OH group of donors, NAD or NADP as acceptor//catalytic activity//obsolete coenzyme binding	--	--	--	--	FALSE	-0.270955	0.863957	FALSE	0.694756	0.314174	FALSE	0.313064	0.701783	FALSE	-0.186984	0.971526	FALSE	0.457718	0.49795
Cluster-11149.26158	21.01	28.43	38.25	27.16	19.37	2846	586939541	AHJ90428.1	2051	3.1e-227	phytoene desaturase, partial [Pogostemon cablin]	XM_011074413.2	XM_011074413	862	0	PREDICTED: Sesamum indicum phytoene dehydrogenase, chloroplastic/chromoplastic (LOC105157894), transcript variant X2, mRNA	K02293	PDS, crtP	15-cis-phytoene desaturase	http://www.genome.jp/dbget-bin/www_bget?ko:K02293	P80093	1987	3.1e-221	15-cis-phytoene desaturase, chloroplastic/chromoplastic OS=Capsicum annuum OX=4072 GN=PDS PE=1 SV=1	PF01266//PF07992//PF03721//PF01494//PF01593	FAD dependent oxidoreductase//Pyridine nucleotide-disulphide oxidoreductase//UDP-glucose/GDP-mannose dehydrogenase family, NAD binding domain//FAD binding domain//Flavin containing amine oxidoreductase	GO:0055114	oxidation-reduction process	GO:0016616//GO:0051287//GO:0016491//GO:0071949	oxidoreductase activity, acting on the CH-OH group of donors, NAD or NADP as acceptor//NAD binding//oxidoreductase activity//FAD binding	--	--	--	--	FALSE	0.266483	0.846674	FALSE	0.0912726	1	FALSE	0.246978	0.750892	FALSE	0.305233	0.806498	FALSE	0.346495	0.625218
Cluster-11149.28927	54.56	68.35	64.07	64.57	33.67	1715	45935133	AAS79591.1	1596	1.1e-174	putative dihydroflavonol reductase [Ipomoea trifida]	XM_012983118.1	XM_012983118	693	0	PREDICTED: Erythranthe guttatus UDP-D-apiose/UDP-D-xylose synthase 2 (LOC105959089), mRNA	-	-	-	http://www.genome.jp/dbget-bin/www_bget?ko:-	Q9SGE0	1495	2.1e-164	UDP-D-apiose/UDP-D-xylose synthase 2 OS=Arabidopsis thaliana OX=3702 GN=AXS2 PE=2 SV=1	PF03721//PF01370//PF01073//PF03435	UDP-glucose/GDP-mannose dehydrogenase family, NAD binding domain//NAD dependent epimerase/dehydratase family//3-beta hydroxysteroid dehydrogenase/isomerase family//Saccharopine dehydrogenase NADP binding domain	GO:0008207//GO:0055114//GO:0008210//GO:0006694//GO:0008209	C21-steroid hormone metabolic process//oxidation-reduction process//estrogen metabolic process//steroid biosynthetic process//androgen metabolic process	GO:0051287//GO:0003854//GO:0016491//GO:0003824//GO:0016616//GO:0050662	NAD binding//3-beta-hydroxy-delta5-steroid dehydrogenase activity//oxidoreductase activity//catalytic activity//oxidoreductase activity, acting on the CH-OH group of donors, NAD or NADP as acceptor//obsolete coenzyme binding	--	--	KOG1429	dTDP-glucose 4-6-dehydratase/UDP-glucuronic acid decarboxylase	FALSE	0.28498	0.835728	FALSE	0.54282	0.446034	FALSE	0.717018	0.184306	FALSE	0.430896	0.612487	FALSE	0.923695	0.0741242
Cluster-11149.41527	10.9	8.31	11.99	17.97	6.32	1198	1276267936	PIN23801.1	1146	1.1e-122	Flavonol reductase/cinnamoyl-CoA reductase [Handroanthus impetiginosus]	XM_009349015.2	XM_009349015	68	2.19e-24	PREDICTED: Pyrus x bretschneideri protein BRI1-5 ENHANCED 1-like (LOC103938964), mRNA	-	-	-	http://www.genome.jp/dbget-bin/www_bget?ko:-	Q40316	845	3.4e-89	Vestitone reductase OS=Medicago sativa OX=3879 PE=1 SV=1	PF01370//PF01073	NAD dependent epimerase/dehydratase family//3-beta hydroxysteroid dehydrogenase/isomerase family	GO:0008209//GO:0006694//GO:0008210//GO:0055114//GO:0008207	androgen metabolic process//steroid biosynthetic process//estrogen metabolic process//oxidation-reduction process//C21-steroid hormone metabolic process	GO:0050662//GO:0016616//GO:0003824//GO:0003854	obsolete coenzyme binding//oxidoreductase activity, acting on the CH-OH group of donors, NAD or NADP as acceptor//catalytic activity//3-beta-hydroxy-delta5-steroid dehydrogenase activity	--	--	--	--	FALSE	-0.906483	0.151075	FALSE	1.11045	0.0564174	FALSE	0.0932788	1	FALSE	-0.0505189	1	FALSE	1.0098	0.0636174
Cluster-11149.30186	42.23	55.22	43.45	12.92	22.97	2048	1276257087	PIN14685.1	618	3.2e-61	Flavonol reductase/cinnamoyl-CoA reductase [Handroanthus impetiginosus]	XM_012977341.1	XM_012977341	215	7.27e-106	PREDICTED: Erythranthe guttatus cinnamoyl-CoA reductase 1-like (LOC105953663), mRNA	-	-	-	http://www.genome.jp/dbget-bin/www_bget?ko:-	Q9S9N9	283	8.6e-24	Cinnamoyl-CoA reductase 1 OS=Arabidopsis thaliana OX=3702 GN=CCR1 PE=1 SV=1	PF02609//PF01073//PF01370	Exonuclease VII small subunit//3-beta hydroxysteroid dehydrogenase/isomerase family//NAD dependent epimerase/dehydratase family	GO:0008209//GO:0006308//GO:0006694//GO:0008210//GO:0008207//GO:0055114	androgen metabolic process//DNA catabolic process//steroid biosynthetic process//estrogen metabolic process//C21-steroid hormone metabolic process//oxidation-reduction process	GO:0050662//GO:0016616//GO:0008855//GO:0003824//GO:0003854	obsolete coenzyme binding//oxidoreductase activity, acting on the CH-OH group of donors, NAD or NADP as acceptor//exodeoxyribonuclease VII activity//catalytic activity//3-beta-hydroxy-delta5-steroid dehydrogenase activity	GO:0009318	exodeoxyribonuclease VII complex	--	--	UP	2.29663	2.34e-06	FALSE	-1.22606	0.0223618	FALSE	0.95977	0.0603836	UP	2.38235	9.15e-07	FALSE	1.10629	0.0277499
Cluster-11149.44721	0.34	0.07	0.78	0.82	0.42	871	747083029	XP_011088866.1	1132	3.5e-121	fatty acyl-CoA reductase 3 [Sesamum indicum]	XM_011090564.2	XM_011090564	368	0	PREDICTED: Sesamum indicum fatty acyl-CoA reductase 3 (LOC105169997), mRNA	-	-	-	http://www.genome.jp/dbget-bin/www_bget?ko:-	Q93ZB9	962	6.8e-103	Fatty acyl-CoA reductase 3 OS=Arabidopsis thaliana OX=3702 GN=FAR3 PE=1 SV=1	PF00016//PF01370//PF01118//PF01073//PF03435	Ribulose bisphosphate carboxylase large chain, catalytic domain//NAD dependent epimerase/dehydratase family//Semialdehyde dehydrogenase, NAD binding domain//3-beta hydroxysteroid dehydrogenase/isomerase family//Saccharopine dehydrogenase NADP binding domain	GO:0006694//GO:0008210//GO:0008209//GO:0008207//GO:0055114	steroid biosynthetic process//estrogen metabolic process//androgen metabolic process//C21-steroid hormone metabolic process//oxidation-reduction process	GO:0016620//GO:0050662//GO:0000287//GO:0051287//GO:0016491//GO:0003854//GO:0003824//GO:0016616	oxidoreductase activity, acting on the aldehyde or oxo group of donors, NAD or NADP as acceptor//obsolete coenzyme binding//magnesium ion binding//NAD binding//oxidoreductase activity//3-beta-hydroxy-delta5-steroid dehydrogenase activity//catalytic activity//oxidoreductase activity, acting on the CH-OH group of donors, NAD or NADP as acceptor	--	--	KOG1221	Acyl-CoA reductase	FALSE	-3.18213	0.0690122	FALSE	0.567035	0.944538	FALSE	-2.69858	0.28735	FALSE	-0.574667	0.982025	FALSE	-0.0571065	1
Cluster-11149.21583	8.25	15.18	10.22	6.67	5.58	1693	747101321	XP_011098787.1	1015	2.5e-107	glycerol-3-phosphate dehydrogenase [NAD(+)] [Sesamum indicum]	XM_011100485.2	XM_011100485	420	0	PREDICTED: Sesamum indicum glycerol-3-phosphate dehydrogenase [NAD(+)] (LOC105177364), mRNA	K00006	GPD1	glycerol-3-phosphate dehydrogenase (NAD+)	http://www.genome.jp/dbget-bin/www_bget?ko:K00006	P52425	877	9.5e-93	Glycerol-3-phosphate dehydrogenase [NAD(+)] OS=Cuphea lanceolata OX=3930 GN=GPDH PE=2 SV=1	PF01210//PF07479	NAD-dependent glycerol-3-phosphate dehydrogenase N-terminus//NAD-dependent glycerol-3-phosphate dehydrogenase C-terminus	GO:0005975//GO:0046486//GO:0046168//GO:0006072//GO:0055114	carbohydrate metabolic process//glycerolipid metabolic process//glycerol-3-phosphate catabolic process//glycerol-3-phosphate metabolic process//oxidation-reduction process	GO:0051287//GO:0004367//GO:0016616	NAD binding//glycerol-3-phosphate dehydrogenase [NAD+] activity//oxidoreductase activity, acting on the CH-OH group of donors, NAD or NADP as acceptor	GO:0009331	glycerol-3-phosphate dehydrogenase complex	KOG2711	Glycerol-3-phosphate dehydrogenase/dihydroxyacetone 3-phosphate reductase	FALSE	1.38872	0.0106156	FALSE	-0.139418	1	FALSE	1.13849	0.0277755	FALSE	0.980341	0.0972607	FALSE	0.790876	0.168839
Cluster-11149.34429	7.84	15.03	10.33	8.56	5.72	2733	604346406	EYU44869.1	692	1.1e-69	hypothetical protein MIMGU_mgv1a004269mg [Erythranthe guttata]	XM_011100546.2	XM_011100546	296	9.13e-151	PREDICTED: Sesamum indicum protoporphyrinogen oxidase, mitochondrial (LOC105177408), transcript variant X3, mRNA	K00231	PPOX, hemY	protoporphyrinogen/coproporphyrinogen III oxidase [EC:1.3.3.4 1.3.3.15]	http://www.genome.jp/dbget-bin/www_bget?ko:K00231	O24164	602	1.2e-60	Protoporphyrinogen oxidase, mitochondrial OS=Nicotiana tabacum OX=4097 GN=PPXII PE=1 SV=1	PF05970//PF05695//PF01266//PF00743//PF01593//PF10261//PF01494//PF02737//PF07992//PF05453	PIF1-like helicase//Plant protein of unknown function (DUF825)//FAD dependent oxidoreductase//Flavin-binding monooxygenase-like//Flavin containing amine oxidoreductase//Inositol phospholipid synthesis and fat-storage-inducing TM//FAD binding domain//3-hydroxyacyl-CoA dehydrogenase, NAD binding domain//Pyridine nucleotide-disulphide oxidoreductase//BmTXKS1/BmP02 toxin family	GO:0009405//GO:0018874//GO:0006631//GO:0000723//GO:0006810//GO:0006574//GO:0006552//GO:0006281//GO:0006568//GO:0006550//GO:0006633//GO:0055114//GO:0019915//GO:0006554	pathogenesis//benzoate metabolic process//fatty acid metabolic process//telomere maintenance//transport//valine catabolic process//leucine catabolic process//DNA repair//tryptophan metabolic process//isoleucine catabolic process//fatty acid biosynthetic process//oxidation-reduction process//lipid storage//lysine catabolic process	GO:0004499//GO:0050661//GO:0003857//GO:0005524//GO:0071949//GO:0003678//GO:0016491//GO:0008200//GO:0050660	N,N-dimethylaniline monooxygenase activity//NADP binding//3-hydroxyacyl-CoA dehydrogenase activity//ATP binding//FAD binding//DNA helicase activity//oxidoreductase activity//ion channel inhibitor activity//flavin adenine dinucleotide binding	GO:0005657//GO:0005576//GO:0009507//GO:0005789	replication fork//extracellular region//chloroplast//endoplasmic reticulum membrane	KOG1276	Protoporphyrinogen oxidase	FALSE	1.01352	0.0833918	FALSE	0.184006	0.938705	FALSE	1.08674	0.0337295	FALSE	0.550014	0.463613	FALSE	0.683987	0.234614
Cluster-11149.13524	8.22	13.21	11.71	12.65	6.59	1710	1276256745	PIN14397.1	432	1e-39	Flavonol reductase/cinnamoyl-CoA reductase [Handroanthus impetiginosus]	XM_031399438.1	XM_031399438	95	3.08e-39	PREDICTED: Pistacia vera cinnamoyl-CoA reductase 1-like (LOC116113294), mRNA	-	-	-	http://www.genome.jp/dbget-bin/www_bget?ko:-	P51102	303	3.5e-26	Dihydroflavonol 4-reductase OS=Arabidopsis thaliana OX=3702 GN=DFRA PE=1 SV=2	PF01370//PF10240//PF01073	NAD dependent epimerase/dehydratase family//Multivesicular body subunit 12//3-beta hydroxysteroid dehydrogenase/isomerase family	GO:0008207//GO:0055114//GO:0008209//GO:0006694//GO:0008210	C21-steroid hormone metabolic process//oxidation-reduction process//androgen metabolic process//steroid biosynthetic process//estrogen metabolic process	GO:0016616//GO:0003824//GO:0003854//GO:0050662	oxidoreductase activity, acting on the CH-OH group of donors, NAD or NADP as acceptor//catalytic activity//3-beta-hydroxy-delta5-steroid dehydrogenase activity//obsolete coenzyme binding	GO:0000813	ESCRT I complex	--	--	FALSE	0.264658	0.862196	FALSE	0.545355	0.473242	FALSE	0.69924	0.222558	FALSE	0.0507268	1	FALSE	0.546035	0.389674
Cluster-11149.22232	30.52	40.5	30.87	17.15	17.41	3033	1217026418	XP_021652968.1	736	1e-74	probable NAD(P)H dehydrogenase (quinone) FQR1-like 1 [Hevea brasiliensis]	XM_011096982.2	XM_011096982	349	3.5e-180	PREDICTED: Sesamum indicum NAD(P)H dehydrogenase (quinone) FQR1 (LOC105174791), mRNA	K03809	wrbA	NAD(P)H dehydrogenase (quinone)	http://www.genome.jp/dbget-bin/www_bget?ko:K03809	Q6NQE2	721	2.1e-74	Probable NAD(P)H dehydrogenase (quinone) FQR1-like 1 OS=Arabidopsis thaliana OX=3702 GN=At4g27270 PE=1 SV=1	PF03358	NADPH-dependent FMN reductase	--	--	GO:0016491	oxidoreductase activity	--	--	KOG3135	1,4-benzoquinone reductase-like; Trp repressor binding protein-like/protoplast-secreted protein	FALSE	1.44031	0.00537396	FALSE	-0.417873	0.617973	FALSE	0.911648	0.077816	UP	1.50767	0.00298975	FALSE	1.03978	0.0397748
Cluster-11149.24700	327.87	591.48	624.21	691.17	356.73	1936	747053670	XP_011073006.1	1567	2.8e-171	glyceraldehyde-3-phosphate dehydrogenase, cytosolic-like [Sesamum indicum]	XM_011074704.2	XM_011074704	746	0	PREDICTED: Sesamum indicum glyceraldehyde-3-phosphate dehydrogenase, cytosolic-like (LOC105158078), mRNA	K00134	GAPDH, gapA	glyceraldehyde 3-phosphate dehydrogenase	http://www.genome.jp/dbget-bin/www_bget?ko:K00134	P26520	1528	3.5e-168	Glyceraldehyde-3-phosphate dehydrogenase, cytosolic OS=Petunia hybrida OX=4102 GN=GAPC PE=2 SV=1	PF00044//PF02800//PF01113//PF02826	Glyceraldehyde 3-phosphate dehydrogenase, NAD binding domain//Glyceraldehyde 3-phosphate dehydrogenase, C-terminal domain//Dihydrodipicolinate reductase, N-terminus//D-isomer specific 2-hydroxyacid dehydrogenase, NAD binding domain	GO:0009085//GO:0055114//GO:0009089	lysine biosynthetic process//oxidation-reduction process//lysine biosynthetic process via diaminopimelate	GO:0051287//GO:0016620//GO:0008839	NAD binding//oxidoreductase activity, acting on the aldehyde or oxo group of donors, NAD or NADP as acceptor//4-hydroxy-tetrahydrodipicolinate reductase	--	--	KOG0657	Glyceraldehyde 3-phosphate dehydrogenase	FALSE	-0.0226	1	FALSE	0.557735	0.417855	FALSE	0.424326	0.492123	FALSE	-0.401476	0.658464	FALSE	0.10625	0.984794
Cluster-11149.4315	0.87	1.64	1.93	0.68	1.11	2103	747053329	XP_011072823.1	1117	4.6e-119	flavin-containing monooxygenase FMO GS-OX-like 9 [Sesamum indicum]	XM_011074521.2	XM_011074521	424	0	PREDICTED: Sesamum indicum flavin-containing monooxygenase FMO GS-OX-like 9 (LOC105157962), mRNA	-	-	-	http://www.genome.jp/dbget-bin/www_bget?ko:-	Q9FF12	908	3e-96	Flavin-containing monooxygenase FMO GS-OX-like 9 OS=Arabidopsis thaliana OX=3702 GN=At5g07800 PE=2 SV=1	PF01494//PF02254//PF01210//PF07992//PF03721//PF01266//PF01593//PF00743	FAD binding domain//TrkA-N domain//NAD-dependent glycerol-3-phosphate dehydrogenase N-terminus//Pyridine nucleotide-disulphide oxidoreductase//UDP-glucose/GDP-mannose dehydrogenase family, NAD binding domain//FAD dependent oxidoreductase//Flavin containing amine oxidoreductase//Flavin-binding monooxygenase-like	GO:0046168//GO:0006813//GO:0055114	glycerol-3-phosphate catabolic process//potassium ion transport//oxidation-reduction process	GO:0051287//GO:0016491//GO:0016616//GO:0050661//GO:0050660//GO:0071949//GO:0004499	NAD binding//oxidoreductase activity//oxidoreductase activity, acting on the CH-OH group of donors, NAD or NADP as acceptor//NADP binding//flavin adenine dinucleotide binding//FAD binding//N,N-dimethylaniline monooxygenase activity	--	--	--	--	FALSE	1.46	0.0346447	FALSE	-1.09905	0.173659	FALSE	0.251495	0.84002	FALSE	1.01658	0.233253	FALSE	-0.132022	1
Cluster-11149.38326	1.64	2.98	3.87	2.72	2.26	1846	1276232240	PIM97400.1	1347	8.6e-146	Glyoxylate/hydroxypyruvate reductase (D-isomer-specific 2-hydroxy acid dehydrogenase superfamily) [Handroanthus impetiginosus]	XM_020692623.1	XM_020692623	492	0	PREDICTED: Sesamum indicum hydroxyphenylpyruvate reductase-like (LOC105157645), mRNA	K15919	HPR2	hydroxypyruvate reductase 2	http://www.genome.jp/dbget-bin/www_bget?ko:K15919	Q65CJ7	1096	4.2e-118	Hydroxyphenylpyruvate reductase OS=Plectranthus scutellarioides OX=4142 GN=HPPR PE=1 SV=2	PF03446//PF02826//PF12300//PF00389//PF02737	NAD binding domain of 6-phosphogluconate dehydrogenase//D-isomer specific 2-hydroxyacid dehydrogenase, NAD binding domain//ATP-dependent RNA helicase RhlB//D-isomer specific 2-hydroxyacid dehydrogenase, catalytic domain//3-hydroxyacyl-CoA dehydrogenase, NAD binding domain	GO:0055114//GO:0006574//GO:0006554//GO:0006550//GO:0006568//GO:0006552//GO:0018874//GO:0006633//GO:0006631	oxidation-reduction process//valine catabolic process//lysine catabolic process//isoleucine catabolic process//tryptophan metabolic process//leucine catabolic process//benzoate metabolic process//fatty acid biosynthetic process//fatty acid metabolic process	GO:0016616//GO:0016817//GO:0016491//GO:0051287//GO:0003857//GO:0050661	oxidoreductase activity, acting on the CH-OH group of donors, NAD or NADP as acceptor//hydrolase activity, acting on acid anhydrides//oxidoreductase activity//NAD binding//3-hydroxyacyl-CoA dehydrogenase activity//NADP binding	--	--	KOG0069	Glyoxylate/hydroxypyruvate reductase (D-isomer-specific 2-hydroxy acid dehydrogenase superfamily)	FALSE	0.331904	0.835728	FALSE	-0.130292	1	FALSE	0.0909289	1	FALSE	-0.0529386	1	FALSE	-0.23309	0.881
Cluster-11149.22003	14.51	21.36	25.77	20.57	15.32	3048	747068296	XP_011080899.1	808	4.5e-83	respiratory burst oxidase homolog protein A [Sesamum indicum]	XM_011082597.2	XM_011082597	430	0	PREDICTED: Sesamum indicum respiratory burst oxidase homolog protein A (LOC105164049), mRNA	K13447	RBOH	respiratory burst oxidase [EC:1.6.3.- 1.11.1.-]	http://www.genome.jp/dbget-bin/www_bget?ko:K13447	Q948U0	606	4.5e-61	Respiratory burst oxidase homolog protein A OS=Solanum tuberosum OX=4113 GN=RBOHA PE=1 SV=1	PF06280//PF08414//PF01221	Fn3-like domain//Respiratory burst NADPH oxidase//Dynein light chain type 1	GO:0006979//GO:0007017//GO:0055114//GO:0006804	response to oxidative stress//microtubule-based process//oxidation-reduction process//obsolete peroxidase reaction	GO:0004601//GO:0004252//GO:0050664	peroxidase activity//serine-type endopeptidase activity//oxidoreductase activity, acting on NAD(P)H, oxygen as acceptor	GO:0005618//GO:0030286//GO:0016020	cell wall//dynein complex//membrane	KOG3430	Dynein light chain type 1	FALSE	0.25435	0.869797	FALSE	0.0296262	1	FALSE	0.1732	0.870002	FALSE	0.171918	0.98536	FALSE	0.151537	0.915928
Cluster-11149.22623	8.93	17.59	12.12	15.39	7.36	3719	1276242979	PIN03748.1	1965	3.8e-217	Fe-S oxidoreductase [Handroanthus impetiginosus]	XM_011085386.2	XM_011085386	897	0	PREDICTED: Sesamum indicum S-adenosyl-L-methionine-dependent tRNA 4-demethylwyosine synthase (LOC105166143), mRNA	-	-	-	http://www.genome.jp/dbget-bin/www_bget?ko:-	Q8RXN5	1540	2.7e-169	S-adenosyl-L-methionine-dependent tRNA 4-demethylwyosine synthase OS=Arabidopsis thaliana OX=3702 GN=TYW1 PE=2 SV=1	PF04055//PF00258//PF03480//PF01694	Radical SAM superfamily//Flavodoxin//Bacterial extracellular solute-binding protein, family 7//Rhomboid family	GO:0055085	transmembrane transport	GO:0004252//GO:0051536//GO:0010181//GO:0003824	serine-type endopeptidase activity//iron-sulfur cluster binding//FMN binding//catalytic activity	GO:0016021	integral component of membrane	KOG1158	NADP/FAD dependent oxidoreductase	FALSE	0.393	0.680584	FALSE	0.668991	0.314842	FALSE	0.950737	0.0653173	FALSE	-0.10912	1	FALSE	0.509848	0.412274
Cluster-11149.14746	1.08	3.11	0.29	0.07	0.18	1468	1173767932	XP_011091378.2	1972	2.3e-218	probable indole-3-pyruvate monooxygenase YUCCA3 [Sesamum indicum]	XM_011093076.2	XM_011093076	645	0	PREDICTED: Sesamum indicum probable indole-3-pyruvate monooxygenase YUCCA3 (LOC105171834), mRNA	K11816	YUCCA	indole-3-pyruvate monooxygenase	http://www.genome.jp/dbget-bin/www_bget?ko:K11816	O23024	1544	3.7e-170	Probable indole-3-pyruvate monooxygenase YUCCA3 OS=Arabidopsis thaliana OX=3702 GN=YUC3 PE=2 SV=1	PF02789//PF07992//PF01494//PF01266//PF00743//PF02254	Cytosol aminopeptidase family, N-terminal domain//Pyridine nucleotide-disulphide oxidoreductase//FAD binding domain//FAD dependent oxidoreductase//Flavin-binding monooxygenase-like//TrkA-N domain	GO:0055114//GO:0006508//GO:0006813	oxidation-reduction process//proteolysis//potassium ion transport	GO:0071949//GO:0050660//GO:0050661//GO:0004499//GO:0016491//GO:0004177	FAD binding//flavin adenine dinucleotide binding//NADP binding//N,N-dimethylaniline monooxygenase activity//oxidoreductase activity//aminopeptidase activity	--	--	--	--	UP	5.5969	1.97e-11	FALSE	-1.67724	0.622538	UP	3.80279	2.4e-07	UP	4.531	5.63e-06	UP	2.80418	0.000790106
Cluster-11149.1486	1.47	0.87	2.8	2.3	1.75	397	--	--	--	--	--	XM_027509257.1	XM_027509257	53	1.49e-16	PREDICTED: Abrus precatorius 3-isopropylmalate dehydrogenase, chloroplastic (LOC113872049), transcript variant X2, mRNA	--	--	--	--	--	--	--	--	PF00180	Isocitrate/isopropylmalate dehydrogenase	GO:0055114	oxidation-reduction process	GO:0016616	oxidoreductase activity, acting on the CH-OH group of donors, NAD or NADP as acceptor	--	--	--	--	FALSE	-1.1219	0.741373	FALSE	-0.00944221	1	FALSE	-1.23421	0.596899	FALSE	0.00119023	1	FALSE	-0.0571065	1
Cluster-11149.24117	13.08	22.84	29.67	104.94	19.02	754	848851246	XP_012835526.1	727	2.7e-74	PREDICTED: LOW QUALITY PROTEIN: uncharacterized protein LOC105956226 [Erythranthe guttata]	XM_012980072.1	XM_012980072	264	1.5e-133	PREDICTED: Erythranthe guttatus uncharacterized LOC105956226 (LOC105956226), mRNA	-	-	-	http://www.genome.jp/dbget-bin/www_bget?ko:-	--	--	--	--	PF02916//PF03435//PF01118//PF00056//PF01073//PF01370	DNA polymerase processivity factor//Saccharopine dehydrogenase NADP binding domain//Semialdehyde dehydrogenase, NAD binding domain//lactate/malate dehydrogenase, NAD binding domain//3-beta hydroxysteroid dehydrogenase/isomerase family//NAD dependent epimerase/dehydratase family	GO:0055114//GO:0008207//GO:0006694//GO:0008210//GO:0006260//GO:0008209	oxidation-reduction process//C21-steroid hormone metabolic process//steroid biosynthetic process//estrogen metabolic process//DNA replication//androgen metabolic process	GO:0051287//GO:0016491//GO:0003854//GO:0003824//GO:0016616//GO:0016620//GO:0050662	NAD binding//oxidoreductase activity//3-beta-hydroxy-delta5-steroid dehydrogenase activity//catalytic activity//oxidoreductase activity, acting on the CH-OH group of donors, NAD or NADP as acceptor//oxidoreductase activity, acting on the aldehyde or oxo group of donors, NAD or NADP as acceptor//obsolete coenzyme binding	--	--	--	--	DOWN	-1.99	7.18e-05	UP	2.06465	3.28e-05	FALSE	-0.0324984	1	DOWN	-2.33745	2.7e-06	FALSE	-0.322783	0.701706
Cluster-11149.3604	1.57	1.58	1.01	0.38	0.65	1251	747091647	XP_011093562.1	1361	1.4e-147	2-alkenal reductase (NADP(+)-dependent) [Sesamum indicum]	XM_011095260.2	XM_011095260	445	0	PREDICTED: Sesamum indicum 2-alkenal reductase (NADP(+)-dependent) (LOC105173501), mRNA	-	-	-	http://www.genome.jp/dbget-bin/www_bget?ko:-	Q39172	773	8e-81	NADPH-dependent oxidoreductase 2-alkenal reductase OS=Arabidopsis thaliana OX=3702 GN=AER PE=1 SV=1	PF00107	Zinc-binding dehydrogenase	GO:0055114	oxidation-reduction process	--	--	--	--	--	--	FALSE	2.24675	0.00698316	FALSE	-1.14906	0.443026	FALSE	0.986128	0.268687	UP	2.69809	0.000412785	FALSE	1.4989	0.0548764
Cluster-11149.14096	8.82	13.17	12.85	18.03	8.65	1300	848916543	XP_012855829.1	1522	3.1e-166	PREDICTED: 3beta-hydroxysteroid-dehydrogenase/decarboxylase isoform 2 [Erythranthe guttata]	XR_002287329.1	XR_002287329	688	0	PREDICTED: Sesamum indicum 3beta-hydroxysteroid-dehydrogenase/decarboxylase (LOC105164848), transcript variant X3, misc_RNA	K07748	E1.1.1.170, NSDHL, ERG26	sterol-4alpha-carboxylate 3-dehydrogenase (decarboxylating)	http://www.genome.jp/dbget-bin/www_bget?ko:K07748	Q67ZE1	1366	1.4e-149	3beta-hydroxysteroid-dehydrogenase/decarboxylase isoform 2 OS=Arabidopsis thaliana OX=3702 GN=3BETAHSD/D2 PE=2 SV=2	PF01370//PF01073	NAD dependent epimerase/dehydratase family//3-beta hydroxysteroid dehydrogenase/isomerase family	GO:0055114//GO:0008207//GO:0008210//GO:0006694//GO:0008209	oxidation-reduction process//C21-steroid hormone metabolic process//estrogen metabolic process//steroid biosynthetic process//androgen metabolic process	GO:0003854//GO:0016616//GO:0003824//GO:0050662	3-beta-hydroxy-delta5-steroid dehydrogenase activity//oxidoreductase activity, acting on the CH-OH group of donors, NAD or NADP as acceptor//catalytic activity//obsolete coenzyme binding	--	--	KOG1430	C-3 sterol dehydrogenase/3-beta-hydroxysteroid dehydrogenase and related dehydrogenases	FALSE	-0.248742	0.891373	FALSE	0.661339	0.350008	FALSE	0.301853	0.705108	FALSE	-0.359745	0.755796	FALSE	0.251567	0.77851
Cluster-11149.27722	209.44	113.94	271.56	116.57	185.05	1726	1276254888	PIN12849.1	795	8.2e-82	NADP/FAD dependent oxidoreductase [Handroanthus impetiginosus]	XM_011071613.2	XM_011071613	487	0	PREDICTED: Sesamum indicum NADPH--cytochrome P450 reductase-like (LOC105155693), mRNA	K00327	POR	NADPH-ferrihemoprotein reductase	http://www.genome.jp/dbget-bin/www_bget?ko:K00327	Q05001	661	1.1e-67	NADPH--cytochrome P450 reductase OS=Catharanthus roseus OX=4058 GN=CPR PE=2 SV=1	PF09179//PF00258//PF03358//PF00667	TilS substrate binding domain//Flavodoxin//NADPH-dependent FMN reductase//FAD binding domain	GO:0008033//GO:0055114	tRNA processing//oxidation-reduction process	GO:0016879//GO:0000166//GO:0010181//GO:0005524//GO:0016491	ligase activity, forming carbon-nitrogen bonds//nucleotide binding//FMN binding//ATP binding//oxidoreductase activity	GO:0005737	cytoplasm	KOG1158	NADP/FAD dependent oxidoreductase	FALSE	0.169701	1	FALSE	-1.06325	0.0506444	FALSE	-1.00433	0.0451661	UP	1.51914	0.00255802	FALSE	0.405886	0.53009
Cluster-11149.29526	2.39	4.4	4.96	7.61	3.4	770	604342643	EYU41667.1	411	1.2e-37	hypothetical protein MIMGU_mgv1a006632mg [Erythranthe guttata]	XM_011079117.2	XM_011079117	181	2.11e-87	PREDICTED: Sesamum indicum UDP-glucuronic acid decarboxylase 1 (LOC105161434), transcript variant X2, mRNA	K08678	UXS1, uxs	UDP-glucuronate decarboxylase	http://www.genome.jp/dbget-bin/www_bget?ko:K08678	Q8VZC0	397	2e-37	UDP-glucuronic acid decarboxylase 1 OS=Arabidopsis thaliana OX=3702 GN=UXS1 PE=1 SV=1	PF01370//PF01073	NAD dependent epimerase/dehydratase family//3-beta hydroxysteroid dehydrogenase/isomerase family	GO:0008210//GO:0006694//GO:0008209//GO:0008207//GO:0055114	estrogen metabolic process//steroid biosynthetic process//androgen metabolic process//C21-steroid hormone metabolic process//oxidation-reduction process	GO:0050662//GO:0003854//GO:0003824//GO:0016616	obsolete coenzyme binding//3-beta-hydroxy-delta5-steroid dehydrogenase activity//catalytic activity//oxidoreductase activity, acting on the CH-OH group of donors, NAD or NADP as acceptor	--	--	KOG1429	dTDP-glucose 4-6-dehydratase/UDP-glucuronic acid decarboxylase	FALSE	-0.578415	0.566119	FALSE	0.760068	0.357601	FALSE	0.0711735	1	FALSE	-1.00414	0.185145	FALSE	-0.293879	0.84538
Cluster-11149.34211	18.67	19	37.97	23.59	26.35	2088	604347086	EYU45390.1	1213	3.4e-130	hypothetical protein MIMGU_mgv1a010216mg [Erythranthe guttata]	XM_011077474.2	XM_011077474	319	1.14e-163	PREDICTED: Sesamum indicum cinnamoyl-CoA reductase-like SNL6 (LOC105160202), mRNA	-	-	-	http://www.genome.jp/dbget-bin/www_bget?ko:-	Q0JKZ0	381	3.8e-35	Cinnamoyl-CoA reductase-like SNL6 OS=Oryza sativa subsp. japonica OX=39947 GN=SNL6 PE=3 SV=1	PF01370//PF01073	NAD dependent epimerase/dehydratase family//3-beta hydroxysteroid dehydrogenase/isomerase family	GO:0006694//GO:0008210//GO:0008209//GO:0008207//GO:0055114	steroid biosynthetic process//estrogen metabolic process//androgen metabolic process//C21-steroid hormone metabolic process//oxidation-reduction process	GO:0050662//GO:0003854//GO:0003824//GO:0016616	obsolete coenzyme binding//3-beta-hydroxy-delta5-steroid dehydrogenase activity//catalytic activity//oxidoreductase activity, acting on the CH-OH group of donors, NAD or NADP as acceptor	--	--	--	--	FALSE	-0.110522	1	FALSE	-0.555938	0.431796	FALSE	-0.77722	0.148606	FALSE	0.337174	0.77543	FALSE	-0.268757	0.729911
Cluster-11149.18036	18.75	38.08	33.59	27.5	23.42	1936	1276236673	PIM99558.1	1732	2e-190	3-isopropylmalate dehydrogenase [Handroanthus impetiginosus]	XM_011075068.2	XM_011075068	822	0	PREDICTED: Sesamum indicum 3-isopropylmalate dehydrogenase 2, chloroplastic (LOC105158342), mRNA	K00052	leuB	3-isopropylmalate dehydrogenase	http://www.genome.jp/dbget-bin/www_bget?ko:K00052	P29102	1582	1.9e-174	3-isopropylmalate dehydrogenase, chloroplastic OS=Brassica napus OX=3708 PE=2 SV=1	PF00180	Isocitrate/isopropylmalate dehydrogenase	GO:0055114	oxidation-reduction process	GO:0016616	oxidoreductase activity, acting on the CH-OH group of donors, NAD or NADP as acceptor	--	--	KOG0785	Isocitrate dehydrogenase, alpha subunit	FALSE	0.671695	0.323833	FALSE	-0.165055	0.961017	FALSE	0.39586	0.539217	FALSE	0.12231	1	FALSE	-0.0927441	1
Cluster-11149.23663	7.95	12.2	11.37	11.84	7.95	1885	747083802	XP_011089281.1	687	3e-69	cinnamoyl-CoA reductase 1 [Sesamum indicum]	XM_011090976.2	XM_011090976	261	1.79e-131	PREDICTED: Sesamum indicum cinnamoyl-CoA reductase 1-like (LOC105170285), mRNA	-	-	-	http://www.genome.jp/dbget-bin/www_bget?ko:-	Q9S9N9	334	9.7e-30	Cinnamoyl-CoA reductase 1 OS=Arabidopsis thaliana OX=3702 GN=CCR1 PE=1 SV=1	PF01073//PF03435//PF01370	3-beta hydroxysteroid dehydrogenase/isomerase family//Saccharopine dehydrogenase NADP binding domain//NAD dependent epimerase/dehydratase family	GO:0055114//GO:0008207//GO:0008209//GO:0006694//GO:0008210	oxidation-reduction process//C21-steroid hormone metabolic process//androgen metabolic process//steroid biosynthetic process//estrogen metabolic process	GO:0003824//GO:0016616//GO:0003854//GO:0016491//GO:0050662	catalytic activity//oxidoreductase activity, acting on the CH-OH group of donors, NAD or NADP as acceptor//3-beta-hydroxy-delta5-steroid dehydrogenase activity//oxidoreductase activity//obsolete coenzyme binding	--	--	--	--	FALSE	0.24486	0.900106	FALSE	0.179238	0.94794	FALSE	0.313335	0.6873	FALSE	0.0989974	1	FALSE	0.228224	0.807867
Cluster-11149.21528	10.3	259.6	115.31	40.28	81.32	418	1229780969	XP_022143720.1	456	4e-43	probable histone H2B.3 [Momordica charantia]	XM_011096525.2	XM_011096525	216	3.86e-107	PREDICTED: Sesamum indicum histone H2B.9 (LOC105174422), mRNA	K11252	H2B	histone H2B	http://www.genome.jp/dbget-bin/www_bget?ko:K11252	Q1S9I9	451	5.8e-44	Probable histone H2B.1 OS=Medicago truncatula OX=3880 PE=3 SV=3	PF03847//PF00125//PF02800	Transcription initiation factor TFIID subunit A//Core histone H2A/H2B/H3/H4//Glyceraldehyde 3-phosphate dehydrogenase, C-terminal domain	GO:0006352//GO:0055114	DNA-templated transcription, initiation//oxidation-reduction process	GO:0016620//GO:0003677	oxidoreductase activity, acting on the aldehyde or oxo group of donors, NAD or NADP as acceptor//DNA binding	GO:0005669//GO:0000786	transcription factor TFIID complex//nucleosome	--	--	UP	2.93346	3.07e-09	FALSE	-1.4148	0.00910895	UP	1.40782	0.00434252	FALSE	-1.31864	0.0402919	DOWN	-2.78275	1.19e-07
Cluster-11149.29918	12.95	20.19	21.29	33.34	15.41	1312	1276239598	PIN01395.1	989	2e-104	UDP-glucose 4-epimerase/UDP-sulfoquinovose synthase [Handroanthus impetiginosus]	XM_011079117.2	XM_011079117	315	1.19e-161	PREDICTED: Sesamum indicum UDP-glucuronic acid decarboxylase 1 (LOC105161434), transcript variant X2, mRNA	K08678	UXS1, uxs	UDP-glucuronate decarboxylase	http://www.genome.jp/dbget-bin/www_bget?ko:K08678	Q8VZC0	739	7.4e-77	UDP-glucuronic acid decarboxylase 1 OS=Arabidopsis thaliana OX=3702 GN=UXS1 PE=1 SV=1	PF01370//PF01073	NAD dependent epimerase/dehydratase family//3-beta hydroxysteroid dehydrogenase/isomerase family	GO:0055114//GO:0008207//GO:0008209//GO:0008210//GO:0006694	oxidation-reduction process//C21-steroid hormone metabolic process//androgen metabolic process//estrogen metabolic process//steroid biosynthetic process	GO:0016616//GO:0003824//GO:0003854//GO:0050662	oxidoreductase activity, acting on the CH-OH group of donors, NAD or NADP as acceptor//catalytic activity//3-beta-hydroxy-delta5-steroid dehydrogenase activity//obsolete coenzyme binding	--	--	KOG1429	dTDP-glucose 4-6-dehydratase/UDP-glucuronic acid decarboxylase	FALSE	-0.519	0.523701	FALSE	0.716144	0.271886	FALSE	0.086375	1	FALSE	-0.691508	0.299549	FALSE	-0.0253687	1
Cluster-11149.17045	6.72	11.94	12.23	13.42	9.18	1748	1276265601	PIN21834.1	1543	1.5e-168	NADP-dependent isocitrate dehydrogenase [Handroanthus impetiginosus]	XM_011099120.2	XM_011099120	587	0	PREDICTED: Sesamum indicum isocitrate dehydrogenase [NADP], chloroplastic/mitochondrial (LOC105176349), transcript variant X1, mRNA	K00031	IDH1, IDH2, icd	isocitrate dehydrogenase	http://www.genome.jp/dbget-bin/www_bget?ko:K00031	Q8LPJ5	1371	5.1e-150	Isocitrate dehydrogenase [NADP], chloroplastic/mitochondrial OS=Arabidopsis thaliana OX=3702 GN=At5g14590 PE=1 SV=1	PF00180//PF02487	Isocitrate/isopropylmalate dehydrogenase//CLN3 protein	GO:0055114	oxidation-reduction process	GO:0016616	oxidoreductase activity, acting on the CH-OH group of donors, NAD or NADP as acceptor	GO:0016020	membrane	KOG1526	NADP-dependent isocitrate dehydrogenase	FALSE	0.0336593	1	FALSE	0.151948	0.987075	FALSE	0.074855	1	FALSE	-0.324873	0.806498	FALSE	-0.222903	0.822682
Cluster-11149.19058	10.25	8.09	10.2	12.78	7.67	1709	1276271247	PIN26670.1	1058	2.6e-112	Flavin-containing monooxygenase [Handroanthus impetiginosus]	XM_012990432.1	XM_012990432	641	0	PREDICTED: Erythranthe guttatus flavin-containing monooxygenase FMO GS-OX-like 4 (LOC105965888), transcript variant X1, mRNA	-	-	-	http://www.genome.jp/dbget-bin/www_bget?ko:-	Q94BV5	824	1.3e-86	Flavin-containing monooxygenase FMO GS-OX-like 4 OS=Arabidopsis thaliana OX=3702 GN=At1g62600 PE=2 SV=1	PF01210//PF01593//PF03446//PF07992//PF01494//PF02737//PF00743//PF01266	NAD-dependent glycerol-3-phosphate dehydrogenase N-terminus//Flavin containing amine oxidoreductase//NAD binding domain of 6-phosphogluconate dehydrogenase//Pyridine nucleotide-disulphide oxidoreductase//FAD binding domain//3-hydroxyacyl-CoA dehydrogenase, NAD binding domain//Flavin-binding monooxygenase-like//FAD dependent oxidoreductase	GO:0006574//GO:0018874//GO:0006631//GO:0055114//GO:0006554//GO:0046168//GO:0006568//GO:0006552//GO:0006550//GO:0006633	valine catabolic process//benzoate metabolic process//fatty acid metabolic process//oxidation-reduction process//lysine catabolic process//glycerol-3-phosphate catabolic process//tryptophan metabolic process//leucine catabolic process//isoleucine catabolic process//fatty acid biosynthetic process	GO:0016616//GO:0016491//GO:0004499//GO:0050661//GO:0003857//GO:0071949//GO:0051287//GO:0050660	oxidoreductase activity, acting on the CH-OH group of donors, NAD or NADP as acceptor//oxidoreductase activity//N,N-dimethylaniline monooxygenase activity//NADP binding//3-hydroxyacyl-CoA dehydrogenase activity//FAD binding//NAD binding//flavin adenine dinucleotide binding	--	--	--	--	FALSE	-0.457737	0.59788	FALSE	0.340762	0.736853	FALSE	-0.227694	0.803059	FALSE	0.354797	0.758938	FALSE	0.645517	0.278772
Cluster-11149.38136	6.48	8.48	12.96	11.46	9.98	2857	747068296	XP_011080899.1	1289	7.1e-139	respiratory burst oxidase homolog protein A [Sesamum indicum]	XM_011082597.2	XM_011082597	564	0	PREDICTED: Sesamum indicum respiratory burst oxidase homolog protein A (LOC105164049), mRNA	K13447	RBOH	respiratory burst oxidase [EC:1.6.3.- 1.11.1.-]	http://www.genome.jp/dbget-bin/www_bget?ko:K13447	O48538	1187	1.8e-128	Respiratory burst oxidase homolog protein F OS=Arabidopsis thaliana OX=3702 GN=RBOHF PE=1 SV=1	PF13499//PF00036//PF08022//PF08414//PF05297//PF13202//PF13405	EF-hand domain pair//EF hand//FAD-binding domain//Respiratory burst NADPH oxidase//Herpesvirus latent membrane protein 1 (LMP1)//EF hand//EF-hand domain	GO:0006804//GO:0055114//GO:0006979//GO:0019087	obsolete peroxidase reaction//oxidation-reduction process//response to oxidative stress//transformation of host cell by virus	GO:0016491//GO:0050664//GO:0004601//GO:0005509	oxidoreductase activity//oxidoreductase activity, acting on NAD(P)H, oxygen as acceptor//peroxidase activity//calcium ion binding	GO:0016021	integral component of membrane	--	--	FALSE	-0.234139	0.91214	FALSE	-0.195761	0.913428	FALSE	-0.540647	0.370155	FALSE	-0.146467	1	FALSE	-0.392208	0.571284
Cluster-11149.11742	0.4	0.16	0.41	0.71	0.32	786	--	--	--	--	--	--	--	--	--	--	--	--	--	--	--	--	--	--	PF00984	UDP-glucose/GDP-mannose dehydrogenase family, central domain	GO:0055114	oxidation-reduction process	GO:0051287//GO:0016616	NAD binding//oxidoreductase activity, acting on the CH-OH group of donors, NAD or NADP as acceptor	--	--	--	--	FALSE	-1.84801	0.386452	FALSE	0.730069	0.908935	FALSE	-1.21641	0.889652	FALSE	-0.165706	1	FALSE	0.5122	1
Cluster-11149.36064	2.19	5.5	5.72	6.65	4.49	1027	747098785	XP_011097422.1	1258	1e-135	isocitrate dehydrogenase [NADP] isoform X1 [Sesamum indicum]	XM_011099120.2	XM_011099120	532	0	PREDICTED: Sesamum indicum isocitrate dehydrogenase [NADP], chloroplastic/mitochondrial (LOC105176349), transcript variant X1, mRNA	K00031	IDH1, IDH2, icd	isocitrate dehydrogenase	http://www.genome.jp/dbget-bin/www_bget?ko:K00031	Q8LPJ5	1094	3.9e-118	Isocitrate dehydrogenase [NADP], chloroplastic/mitochondrial OS=Arabidopsis thaliana OX=3702 GN=At5g14590 PE=1 SV=1	PF00180	Isocitrate/isopropylmalate dehydrogenase	GO:0055114	oxidation-reduction process	GO:0016616	oxidoreductase activity, acting on the CH-OH group of donors, NAD or NADP as acceptor	--	--	KOG1526	NADP-dependent isocitrate dehydrogenase	FALSE	-0.066838	1	FALSE	0.166032	1	FALSE	-0.0114434	1	FALSE	-0.927881	0.202458	FALSE	-0.811493	0.231613
Cluster-11149.5483	5.72	5.81	7.19	4.77	5.76	1304	848861346	XP_012831493.1	1648	7.6e-181	PREDICTED: malate dehydrogenase, cytoplasmic-like isoform X1 [Erythranthe guttata]	XM_012976039.1	XM_012976039	516	0	PREDICTED: Erythranthe guttatus malate dehydrogenase, cytoplasmic-like (LOC105952477), transcript variant X1, mRNA	K00025	MDH1	malate dehydrogenase	http://www.genome.jp/dbget-bin/www_bget?ko:K00025	Q08062	1411	8.7e-155	Malate dehydrogenase, cytoplasmic OS=Zea mays OX=4577 PE=1 SV=2	PF00056//PF01073//PF02866	lactate/malate dehydrogenase, NAD binding domain//3-beta hydroxysteroid dehydrogenase/isomerase family//lactate/malate dehydrogenase, alpha/beta C-terminal domain	GO:0008207//GO:0055114//GO:0008209//GO:0008210//GO:0006694	C21-steroid hormone metabolic process//oxidation-reduction process//androgen metabolic process//estrogen metabolic process//steroid biosynthetic process	GO:0016616//GO:0003854//GO:0016491	oxidoreductase activity, acting on the CH-OH group of donors, NAD or NADP as acceptor//3-beta-hydroxy-delta5-steroid dehydrogenase activity//oxidoreductase activity	--	--	KOG1496	Malate dehydrogenase	FALSE	0.487559	0.594583	FALSE	-0.668738	0.357601	FALSE	-0.291873	0.712414	FALSE	0.933326	0.148189	FALSE	0.214634	0.851548
Cluster-11149.32152	10.6	19.32	11.17	24.4	8.95	1141	1276265768	PIN21978.1	872	6.4e-91	putative flavoprotein [Handroanthus impetiginosus]	XM_011093545.2	XM_011093545	366	0	PREDICTED: Sesamum indicum NADPH:quinone oxidoreductase (LOC105172182), mRNA	-	-	-	http://www.genome.jp/dbget-bin/www_bget?ko:-	Q8H9D2	757	5.2e-79	NAD(P)H:quinone oxidoreductase OS=Solanum tuberosum OX=4113 PE=2 SV=1	PF05827//PF03358	Vacuolar ATP synthase subunit S1 (ATP6S1)//NADPH-dependent FMN reductase	GO:1902600//GO:0006119//GO:0015986	proton transmembrane transport//oxidative phosphorylation//ATP synthesis coupled proton transport	GO:0046933//GO:0046961//GO:0016491	proton-transporting ATP synthase activity, rotational mechanism//proton-transporting ATPase activity, rotational mechanism//oxidoreductase activity	GO:0045259//GO:0033180	proton-transporting ATP synthase complex//proton-transporting V-type ATPase, V1 domain	--	--	FALSE	-0.130653	1	FALSE	1.04916	0.0686273	FALSE	0.807742	0.150021	FALSE	-0.531731	0.500735	FALSE	0.467373	0.483186
Cluster-11149.8628	1.31	3.48	3.4	2.83	2.73	2095	747090892	XP_011093156.1	832	5.1e-86	methionine adenosyltransferase 2 subunit beta [Sesamum indicum]	XM_011094854.2	XM_011094854	366	0	PREDICTED: Sesamum indicum methionine adenosyltransferase 2 subunit beta (LOC105173181), mRNA	-	-	-	http://www.genome.jp/dbget-bin/www_bget?ko:-	Q9NZL9	204	1.3e-14	Methionine adenosyltransferase 2 subunit beta OS=Homo sapiens OX=9606 GN=MAT2B PE=1 SV=1	PF00927//PF01370//PF01073//PF01118	Transglutaminase family, C-terminal ig like domain//NAD dependent epimerase/dehydratase family//3-beta hydroxysteroid dehydrogenase/isomerase family//Semialdehyde dehydrogenase, NAD binding domain	GO:0018149//GO:0055114//GO:0008207//GO:0008210//GO:0006694//GO:0008209	peptide cross-linking//oxidation-reduction process//C21-steroid hormone metabolic process//estrogen metabolic process//steroid biosynthetic process//androgen metabolic process	GO:0051287//GO:0003854//GO:0003824//GO:0016616//GO:0016620//GO:0050662//GO:0003810	NAD binding//3-beta-hydroxy-delta5-steroid dehydrogenase activity//catalytic activity//oxidoreductase activity, acting on the CH-OH group of donors, NAD or NADP as acceptor//oxidoreductase activity, acting on the aldehyde or oxo group of donors, NAD or NADP as acceptor//obsolete coenzyme binding//protein-glutamine gamma-glutamyltransferase activity	--	--	--	--	FALSE	0.499074	0.578927	FALSE	-0.340466	0.793496	FALSE	0.0478919	1	FALSE	-0.44138	0.74216	FALSE	-0.83156	0.18491
Cluster-11149.30233	90.47	62.8	133.2	64.36	107.04	2936	747047859	XP_011069915.1	885	5.1e-92	NADPH--cytochrome P450 reductase-like [Sesamum indicum]	XM_012975828.1	XM_012975828	328	1.6e-168	PREDICTED: Erythranthe guttatus NADPH--cytochrome P450 reductase-like (LOC105952294), mRNA	K00327	POR	NADPH-ferrihemoprotein reductase	http://www.genome.jp/dbget-bin/www_bget?ko:K00327	Q05001	828	7.9e-87	NADPH--cytochrome P450 reductase OS=Catharanthus roseus OX=4058 GN=CPR PE=2 SV=1	PF00667//PF03341//PF17204//PF00175	FAD binding domain//Poxvirus mRNA capping enzyme, small subunit//Sid-5 family//oxidoreductase NAD-binding domain	GO:0009451//GO:0050658//GO:0055114//GO:0006370//GO:0016246	RNA modification//RNA transport//oxidation-reduction process//7-methylguanosine mRNA capping//RNA interference	GO:0004482//GO:0016491	mRNA (guanine-N7-)-methyltransferase activity//oxidoreductase activity	GO:0005770	late endosome	KOG1158	NADP/FAD dependent oxidoreductase	FALSE	0.164911	1	FALSE	-1.12977	0.0353836	FALSE	-1.07564	0.030486	FALSE	1.167	0.0289129	FALSE	-0.0127778	1
Cluster-11149.15022	9.54	12.85	13.68	16.76	11.05	4594	1600638821	TEY23682.1	2298	1.1e-255	hypothetical protein Saspl_040422 [Salvia splendens]	XM_011078282.2	XM_011078282	967	0	PREDICTED: Sesamum indicum transmembrane protein 87A-like (LOC105160792), mRNA	-	-	-	http://www.genome.jp/dbget-bin/www_bget?ko:-	Q949Q0	906	1.1e-95	Glycerol-3-phosphate dehydrogenase [NAD(+)] 2, chloroplastic OS=Arabidopsis thaliana OX=3702 GN=GLY1 PE=1 SV=1	PF07479//PF03435//PF06814//PF01210//PF01118//PF07992	NAD-dependent glycerol-3-phosphate dehydrogenase C-terminus//Saccharopine dehydrogenase NADP binding domain//Lung seven transmembrane receptor//NAD-dependent glycerol-3-phosphate dehydrogenase N-terminus//Semialdehyde dehydrogenase, NAD binding domain//Pyridine nucleotide-disulphide oxidoreductase	GO:0055114//GO:0046168//GO:0006072//GO:0046486//GO:0005975	oxidation-reduction process//glycerol-3-phosphate catabolic process//glycerol-3-phosphate metabolic process//glycerolipid metabolic process//carbohydrate metabolic process	GO:0016616//GO:0004367//GO:0016491//GO:0051287//GO:0016620	oxidoreductase activity, acting on the CH-OH group of donors, NAD or NADP as acceptor//glycerol-3-phosphate dehydrogenase [NAD+] activity//oxidoreductase activity//NAD binding//oxidoreductase activity, acting on the aldehyde or oxo group of donors, NAD or NADP as acceptor	GO:0016021//GO:0009331	integral component of membrane//glycerol-3-phosphate dehydrogenase complex	KOG2568	Predicted membrane protein	FALSE	-0.183449	0.980274	FALSE	0.205913	0.908074	FALSE	-0.088308	1	FALSE	-0.13687	1	FALSE	0.0190368	1
Cluster-11149.42164	18.04	13.7	10.19	13.99	8.31	1349	1276244487	PIN04844.1	1382	5.5e-150	putative dehydrogenase [Handroanthus impetiginosus]	XM_011095336.2	XM_011095336	606	0	PREDICTED: Sesamum indicum probable 3-hydroxyisobutyrate dehydrogenase-like 1, mitochondrial (LOC105173553), transcript variant X2, mRNA	-	-	-	http://www.genome.jp/dbget-bin/www_bget?ko:-	Q9SZE1	1121	3.8e-121	Probable 3-hydroxyisobutyrate dehydrogenase-like 1, mitochondrial OS=Arabidopsis thaliana OX=3702 GN=At4g29120 PE=1 SV=1	PF02826//PF00107//PF01370//PF03446//PF14833//PF02737	D-isomer specific 2-hydroxyacid dehydrogenase, NAD binding domain//Zinc-binding dehydrogenase//NAD dependent epimerase/dehydratase family//NAD binding domain of 6-phosphogluconate dehydrogenase//NAD-binding of NADP-dependent 3-hydroxyisobutyrate dehydrogenase//3-hydroxyacyl-CoA dehydrogenase, NAD binding domain	GO:0006554//GO:0006574//GO:0055114//GO:0018874//GO:0006633//GO:0006631//GO:0006568//GO:0006552//GO:0006550	lysine catabolic process//valine catabolic process//oxidation-reduction process//benzoate metabolic process//fatty acid biosynthetic process//fatty acid metabolic process//tryptophan metabolic process//leucine catabolic process//isoleucine catabolic process	GO:0051287//GO:0016491//GO:0003824//GO:0003857//GO:0050661//GO:0050662	NAD binding//oxidoreductase activity//catalytic activity//3-hydroxyacyl-CoA dehydrogenase activity//NADP binding//obsolete coenzyme binding	--	--	KOG0409	Predicted dehydrogenase	FALSE	0.173906	1	FALSE	0.355067	0.72813	FALSE	0.418216	0.534432	FALSE	1.03846	0.0709912	FALSE	1.34343	0.00838608
Cluster-11149.8502	15.06	23.3	35.24	31.14	28.78	1053	747089878	XP_011092596.1	1448	9.5e-158	isoflavone reductase homolog [Sesamum indicum]	XM_011094294.2	XM_011094294	502	0	PREDICTED: Sesamum indicum isoflavone reductase homolog (LOC105172735), mRNA	K21568	-	-	http://www.genome.jp/dbget-bin/www_bget?ko:K21568	P52581	1314	1.2e-143	Isoflavone reductase homolog OS=Lupinus albus OX=3870 PE=2 SV=1	PF01118//PF02254//PF01370//PF05190//PF01073	Semialdehyde dehydrogenase, NAD binding domain//TrkA-N domain//NAD dependent epimerase/dehydratase family//MutS family domain IV//3-beta hydroxysteroid dehydrogenase/isomerase family	GO:0008210//GO:0006694//GO:0008209//GO:0006298//GO:0008207//GO:0055114//GO:0006813	estrogen metabolic process//steroid biosynthetic process//androgen metabolic process//mismatch repair//C21-steroid hormone metabolic process//oxidation-reduction process//potassium ion transport	GO:0005524//GO:0016620//GO:0050662//GO:0003854//GO:0051287//GO:0030983//GO:0016616//GO:0003824	ATP binding//oxidoreductase activity, acting on the aldehyde or oxo group of donors, NAD or NADP as acceptor//obsolete coenzyme binding//3-beta-hydroxy-delta5-steroid dehydrogenase activity//NAD binding//mismatched DNA binding//oxidoreductase activity, acting on the CH-OH group of donors, NAD or NADP as acceptor//catalytic activity	--	--	--	--	FALSE	-0.211733	0.956457	FALSE	-0.283661	0.796404	FALSE	-0.606133	0.291894	FALSE	-0.37787	0.735603	FALSE	-0.711485	0.21009
Cluster-11149.4754	1.61	1.47	2.55	3.14	2.09	939	747088509	XP_011091847.1	723	9.9e-74	NADPH:quinone oxidoreductase [Sesamum indicum]	XM_023020835.1	XM_023020835	251	3.17e-126	PREDICTED: Olea europaea var. sylvestris NAD(P)H:quinone oxidoreductase (LOC111394824), mRNA	-	-	-	http://www.genome.jp/dbget-bin/www_bget?ko:-	Q8H9D2	654	3.8e-67	NAD(P)H:quinone oxidoreductase OS=Solanum tuberosum OX=4113 PE=2 SV=1	PF03358	NADPH-dependent FMN reductase	--	--	GO:0016491	oxidoreductase activity	--	--	--	--	FALSE	-0.881699	0.33168	FALSE	0.188462	1	FALSE	-0.803053	0.372063	FALSE	-0.291725	0.959512	FALSE	-0.153033	1
Cluster-11149.27199	61.97	53.11	66.96	177.61	54.93	2107	848888914	XP_012844638.1	1952	6.9e-216	PREDICTED: LOW QUALITY PROTEIN: UDP-glucuronate 4-epimerase 6 [Erythranthe guttata]	XM_011085911.2	XM_011085911	813	0	PREDICTED: Sesamum indicum UDP-glucuronate 4-epimerase 6 (LOC105166528), mRNA	K08679	E5.1.3.6	UDP-glucuronate 4-epimerase	http://www.genome.jp/dbget-bin/www_bget?ko:K08679	Q9LIS3	1737	2.2e-192	UDP-glucuronate 4-epimerase 6 OS=Arabidopsis thaliana OX=3702 GN=GAE6 PE=1 SV=1	PF01073//PF01370//PF08241//PF00056	3-beta hydroxysteroid dehydrogenase/isomerase family//NAD dependent epimerase/dehydratase family//Methyltransferase domain//lactate/malate dehydrogenase, NAD binding domain	GO:0008207//GO:0055114//GO:0008209//GO:0006694//GO:0008210	C21-steroid hormone metabolic process//oxidation-reduction process//androgen metabolic process//steroid biosynthetic process//estrogen metabolic process	GO:0003824//GO:0016616//GO:0003854//GO:0016491//GO:0050662//GO:0008168	catalytic activity//oxidoreductase activity, acting on the CH-OH group of donors, NAD or NADP as acceptor//3-beta-hydroxy-delta5-steroid dehydrogenase activity//oxidoreductase activity//obsolete coenzyme binding//methyltransferase activity	--	--	KOG1371	UDP-glucose 4-epimerase/UDP-sulfoquinovose synthase	DOWN	-1.54	0.00240916	FALSE	1.29653	0.0126648	FALSE	-0.354108	0.601473	FALSE	-0.844406	0.149799	FALSE	0.402111	0.5366
Cluster-11149.20942	61.09	43.13	47.28	29.56	39.27	2526	848934132	XP_012829622.1	1193	8.5e-128	PREDICTED: alcohol dehydrogenase-like 7 [Erythranthe guttata]	XM_011101355.2	XM_011101355	401	0	PREDICTED: Sesamum indicum alcohol dehydrogenase-like 7 (LOC105178015), mRNA	K00121	frmA, ADH5, adhC	S-(hydroxymethyl)glutathione dehydrogenase / alcohol dehydrogenase [EC:1.1.1.284 1.1.1.1]	http://www.genome.jp/dbget-bin/www_bget?ko:K00121	Q9FH04	1017	8.2e-109	Alcohol dehydrogenase-like 7 OS=Arabidopsis thaliana OX=3702 GN=At5g42250 PE=2 SV=1	PF00107//PF08240//PF02826//PF03721//PF02254//PF04736	Zinc-binding dehydrogenase//Alcohol dehydrogenase GroES-like domain//D-isomer specific 2-hydroxyacid dehydrogenase, NAD binding domain//UDP-glucose/GDP-mannose dehydrogenase family, NAD binding domain//TrkA-N domain//Eclosion hormone	GO:0018990//GO:0007218//GO:0006813//GO:0055114	ecdysis, chitin-based cuticle//neuropeptide signaling pathway//potassium ion transport//oxidation-reduction process	GO:0051287//GO:0008255//GO:0016616	NAD binding//ecdysis-triggering hormone activity//oxidoreductase activity, acting on the CH-OH group of donors, NAD or NADP as acceptor	--	--	KOG0022	Alcohol dehydrogenase, class III	FALSE	0.745887	0.244997	FALSE	-0.806015	0.178234	FALSE	-0.170908	0.871571	UP	1.72274	0.000493704	FALSE	0.866716	0.0986487
Cluster-11149.32029	13.84	27.04	24.64	20.63	20.52	1268	747099784	XP_011097952.1	583	2.3e-57	probable NAD(P)H dehydrogenase (quinone) FQR1-like 1 [Sesamum indicum]	XM_011099650.2	XM_011099650	284	1.96e-144	PREDICTED: Sesamum indicum probable NAD(P)H dehydrogenase (quinone) FQR1-like 1 (LOC105176750), mRNA	K03809	wrbA	NAD(P)H dehydrogenase (quinone)	http://www.genome.jp/dbget-bin/www_bget?ko:K03809	Q6NQE2	544	2.9e-54	Probable NAD(P)H dehydrogenase (quinone) FQR1-like 1 OS=Arabidopsis thaliana OX=3702 GN=At4g27270 PE=1 SV=1	PF03358//PF00258	NADPH-dependent FMN reductase//Flavodoxin	--	--	GO:0010181//GO:0016491	FMN binding//oxidoreductase activity	--	--	KOG3135	1,4-benzoquinone reductase-like; Trp repressor binding protein-like/protoplast-secreted protein	FALSE	0.594841	0.410145	FALSE	-0.389144	0.668513	FALSE	0.0949277	0.998824	FALSE	0.0953965	1	FALSE	-0.343719	0.646116
Cluster-11149.37151	1.8	3.95	3.3	4.34	2.75	1500	1216249587	XP_021608506.1	404	1.5e-36	NAD(P)H dehydrogenase (quinone) FQR1 isoform X2 [Manihot esculenta]	XM_011096982.2	XM_011096982	171	1.52e-81	PREDICTED: Sesamum indicum NAD(P)H dehydrogenase (quinone) FQR1 (LOC105174791), mRNA	K03809	wrbA	NAD(P)H dehydrogenase (quinone)	http://www.genome.jp/dbget-bin/www_bget?ko:K03809	Q9LSQ5	389	3.2e-36	NAD(P)H dehydrogenase (quinone) FQR1 OS=Arabidopsis thaliana OX=3702 GN=FQR1 PE=1 SV=1	PF12131//PF03358	Protein of unknown function (DUF3586)//NADPH-dependent FMN reductase	GO:0006508	proteolysis	GO:0016491//GO:0004197	oxidoreductase activity//cysteine-type endopeptidase activity	--	--	KOG3135	1,4-benzoquinone reductase-like; Trp repressor binding protein-like/protoplast-secreted protein	FALSE	0.0672745	1	FALSE	0.262207	0.884762	FALSE	0.2188	0.860023	FALSE	-0.595501	0.520387	FALSE	-0.383129	0.699554
Cluster-11149.21647	20.11	39.95	39.83	41.98	33.3	3222	1276237010	PIM99754.1	1094	3.3e-116	NADH:ubiquinone oxidoreductase, NDUFA9/39kDa subunit [Handroanthus impetiginosus]	XM_011081822.2	XM_011081822	488	0	PREDICTED: Sesamum indicum NADH dehydrogenase [ubiquinone] 1 alpha subcomplex subunit 9, mitochondrial (LOC105163470), mRNA	K03953	NDUFA9	NADH dehydrogenase (ubiquinone) 1 alpha subcomplex subunit 9	http://www.genome.jp/dbget-bin/www_bget?ko:K03953	Q9SK66	968	5e-103	NADH dehydrogenase [ubiquinone] 1 alpha subcomplex subunit 9, mitochondrial OS=Arabidopsis thaliana OX=3702 GN=At2g20360 PE=1 SV=2	PF01370//PF01073//PF03435	NAD dependent epimerase/dehydratase family//3-beta hydroxysteroid dehydrogenase/isomerase family//Saccharopine dehydrogenase NADP binding domain	GO:0006694//GO:0008210//GO:0008209//GO:0008207//GO:0055114	steroid biosynthetic process//estrogen metabolic process//androgen metabolic process//C21-steroid hormone metabolic process//oxidation-reduction process	GO:0050662//GO:0003854//GO:0016491//GO:0003824//GO:0016616	obsolete coenzyme binding//3-beta-hydroxy-delta5-steroid dehydrogenase activity//oxidoreductase activity//catalytic activity//oxidoreductase activity, acting on the CH-OH group of donors, NAD or NADP as acceptor	--	--	KOG2865	NADH:ubiquinone oxidoreductase, NDUFA9/39kDa subunit	FALSE	0.128892	1	FALSE	-0.0617369	1	FALSE	-0.0436243	1	FALSE	-0.385974	0.695269	FALSE	-0.497712	0.421185
Cluster-11149.24545	21.59	29.6	20.8	34.7	17.5	1821	1173766544	XP_011084738.2	2067	2.7e-229	dihydropyrimidine dehydrogenase (NADP(+)), chloroplastic [Sesamum indicum]	XM_011086436.2	XM_011086436	846	0	PREDICTED: Sesamum indicum dihydropyrimidine dehydrogenase (NADP(+)), chloroplastic (LOC105166912), mRNA	K00207	DPYD	dihydropyrimidine dehydrogenase (NADP+)	http://www.genome.jp/dbget-bin/www_bget?ko:K00207	Q9LVI9	1752	3.5e-194	Dihydropyrimidine dehydrogenase (NADP(+)), chloroplastic OS=Arabidopsis thaliana OX=3702 GN=PYD1 PE=1 SV=1	PF01070//PF01180//PF01207//PF01645	FMN-dependent dehydrogenase//Dihydroorotate dehydrogenase//Dihydrouridine synthase (Dus)//Conserved region in glutamate synthase	GO:0008033//GO:0006537//GO:0055114	tRNA processing//glutamate biosynthetic process//oxidation-reduction process	GO:0050660//GO:0016627//GO:0015930//GO:0016638//GO:0017150//GO:0016491	flavin adenine dinucleotide binding//oxidoreductase activity, acting on the CH-CH group of donors//glutamate synthase activity//oxidoreductase activity, acting on the CH-NH2 group of donors//tRNA dihydrouridine synthase activity//oxidoreductase activity	GO:0005737	cytoplasm	KOG1799	Dihydropyrimidine dehydrogenase	FALSE	-0.0270834	1	FALSE	0.590989	0.384169	FALSE	0.453131	0.459651	FALSE	-0.0104457	1	FALSE	0.530521	0.384834
Cluster-11149.33695	17.23	11.31	11.24	17.29	9.54	1009	728830155	KHG09598.1	685	2.7e-69	Delta(14)-sterol reductase -like protein [Gossypium arboreum]	XM_011096118.2	XM_011096118	274	5.6e-139	PREDICTED: Sesamum indicum delta(14)-sterol reductase (LOC105174121), mRNA	K00222	TM7SF2, ERG24	Delta14-sterol reductase	http://www.genome.jp/dbget-bin/www_bget?ko:K00222	Q9LDR4	504	1e-49	Delta(14)-sterol reductase OS=Arabidopsis thaliana OX=3702 GN=FK PE=1 SV=2	PF01222	Ergosterol biosynthesis ERG4/ERG24 family	GO:0016126	sterol biosynthetic process	GO:0016628	oxidoreductase activity, acting on the CH-CH group of donors, NAD or NADP as acceptor	GO:0016020	membrane	KOG1435	Sterol reductase/lamin B receptor	FALSE	-0.404679	0.698096	FALSE	0.458909	0.588353	FALSE	-0.0564706	1	FALSE	0.664991	0.341611	FALSE	1.0738	0.0438853
Cluster-11149.19685	31.32	29.84	62.48	34.86	54	1237	1557855368	RWR80717.1	1378	1.5e-149	bifunctional dTDP-4-dehydrorhamnose 3,5-epimerase/dTDP-4-dehydrorhamnose reductase [Cinnamomum micranthum f. kanehirae]	XM_011073753.2	XM_011073753	491	0	PREDICTED: Sesamum indicum bifunctional dTDP-4-dehydrorhamnose 3,5-epimerase/dTDP-4-dehydrorhamnose reductase (LOC105157346), mRNA	K12451	UER1	3,5-epimerase/4-reductase [EC:5.1.3.- 1.1.1.-]	http://www.genome.jp/dbget-bin/www_bget?ko:K12451	Q9LQ04	1365	1.8e-149	Bifunctional dTDP-4-dehydrorhamnose 3,5-epimerase/dTDP-4-dehydrorhamnose reductase OS=Arabidopsis thaliana OX=3702 GN=NRS/ER PE=1 SV=1	PF01370//PF01073	NAD dependent epimerase/dehydratase family//3-beta hydroxysteroid dehydrogenase/isomerase family	GO:0008210//GO:0006694//GO:0008209//GO:0055114//GO:0008207	estrogen metabolic process//steroid biosynthetic process//androgen metabolic process//oxidation-reduction process//C21-steroid hormone metabolic process	GO:0050662//GO:0003854//GO:0003824//GO:0016616	obsolete coenzyme binding//3-beta-hydroxy-delta5-steroid dehydrogenase activity//catalytic activity//oxidoreductase activity, acting on the CH-OH group of donors, NAD or NADP as acceptor	--	--	--	--	FALSE	-0.0188837	1	FALSE	-1.02854	0.0632189	FALSE	-1.15818	0.0205859	FALSE	0.517214	0.503476	FALSE	-0.561306	0.340701
Cluster-11149.28706	17.39	59.25	52.82	81.98	46.18	1184	1600707477	TEY89174.1	1437	2e-156	UDPglucose 6-dehydrogenase [Salvia splendens]	XM_011087430.2	XM_011087430	678	0	PREDICTED: Sesamum indicum UDP-glucose 6-dehydrogenase 4 (LOC105167638), mRNA	K00012	UGDH, ugd	UDPglucose 6-dehydrogenase	http://www.genome.jp/dbget-bin/www_bget?ko:K00012	Q9LF33	1392	1.3e-152	UDP-glucose 6-dehydrogenase 3 OS=Arabidopsis thaliana OX=3702 GN=UGD3 PE=1 SV=1	PF03720//PF00984	UDP-glucose/GDP-mannose dehydrogenase family, UDP binding domain//UDP-glucose/GDP-mannose dehydrogenase family, central domain	GO:0055114	oxidation-reduction process	GO:0016616//GO:0051287	oxidoreductase activity, acting on the CH-OH group of donors, NAD or NADP as acceptor//NAD binding	--	--	KOG2666	UDP-glucose/GDP-mannose dehydrogenase	FALSE	-0.26287	0.854559	FALSE	0.430657	0.59423	FALSE	0.057014	1	DOWN	-1.56494	0.00216682	FALSE	-1.18424	0.019913
Cluster-11149.27503	13.52	11.59	9.48	30.01	8.29	2081	747068714	XP_011081125.1	1821	1.1e-200	UDP-glucuronate 4-epimerase 3 [Sesamum indicum]	XM_011082823.2	XM_011082823	760	0	PREDICTED: Sesamum indicum UDP-glucuronate 4-epimerase 3 (LOC105164212), mRNA	-	-	-	http://www.genome.jp/dbget-bin/www_bget?ko:-	O81312	1359	1.5e-148	UDP-glucuronate 4-epimerase 3 OS=Arabidopsis thaliana OX=3702 GN=GAE3 PE=2 SV=1	PF01370//PF00056//PF01073//PF01375	NAD dependent epimerase/dehydratase family//lactate/malate dehydrogenase, NAD binding domain//3-beta hydroxysteroid dehydrogenase/isomerase family//Heat-labile enterotoxin alpha chain	GO:0008207//GO:0055114//GO:0008210//GO:0006694//GO:0008209//GO:0009405	C21-steroid hormone metabolic process//oxidation-reduction process//estrogen metabolic process//steroid biosynthetic process//androgen metabolic process//pathogenesis	GO:0003854//GO:0016491//GO:0090729//GO:0016616//GO:0003824//GO:0050662	3-beta-hydroxy-delta5-steroid dehydrogenase activity//oxidoreductase activity//toxin activity//oxidoreductase activity, acting on the CH-OH group of donors, NAD or NADP as acceptor//catalytic activity//obsolete coenzyme binding	GO:0005615	extracellular space	--	--	FALSE	-1.17063	0.0344521	UP	1.45917	0.00499196	FALSE	0.177789	0.871018	FALSE	-0.475977	0.557126	FALSE	0.933136	0.0787186
Cluster-11149.27364	3.17	4.09	3.65	3.78	3.21	4983	1593541871	QBM79469.1	1867	1.2e-205	MATE39 [Rehmannia glutinosa]	MK120951.1	MK120951	1411	0	Rehmannia glutinosa MATE39 mRNA, complete cds	-	-	-	http://www.genome.jp/dbget-bin/www_bget?ko:-	Q9SVE7	1326	2.4e-144	Protein DETOXIFICATION 45, chloroplastic OS=Arabidopsis thaliana OX=3702 GN=DTX45 PE=2 SV=2	PF06220//PF01554//PF01266//PF00743//PF01593//PF03206//PF07992	U1 zinc finger//MatE//FAD dependent oxidoreductase//Flavin-binding monooxygenase-like//Flavin containing amine oxidoreductase//Nitrogen fixation protein NifW//Pyridine nucleotide-disulphide oxidoreductase	GO:0055114//GO:0006810//GO:0055085//GO:0009399	oxidation-reduction process//transport//transmembrane transport//nitrogen fixation	GO:0016491//GO:0015297//GO:0008270//GO:0004499//GO:0050660//GO:0050661//GO:0042910	oxidoreductase activity//antiporter activity//zinc ion binding//N,N-dimethylaniline monooxygenase activity//flavin adenine dinucleotide binding//NADP binding//xenobiotic transmembrane transporter activity	GO:0016020	membrane	KOG1399	Flavin-containing monooxygenase	FALSE	0.314025	0.832554	FALSE	-0.160917	0.97433	FALSE	0.0423496	1	FALSE	0.423398	0.647229	FALSE	0.212478	0.840529
Cluster-11149.19977	6.84	5.73	5.03	7.51	4.46	1072	747094260	XP_011094963.1	1211	2.9e-130	steroid 5-alpha-reductase DET2 [Sesamum indicum]	XM_011096661.2	XM_011096661	487	0	PREDICTED: Sesamum indicum steroid 5-alpha-reductase DET2 (LOC105174532), mRNA	K09591	DET2	steroid 5-alpha-reductase	http://www.genome.jp/dbget-bin/www_bget?ko:K09591	Q2QDF6	918	1.1e-97	Steroid 5-alpha-reductase DET2 OS=Gossypium hirsutum OX=3635 GN=DET2 PE=1 SV=1	PF02544//PF01222	3-oxo-5-alpha-steroid 4-dehydrogenase//Ergosterol biosynthesis ERG4/ERG24 family	GO:0016126//GO:0006629	sterol biosynthetic process//lipid metabolic process	GO:0016627//GO:0016628	oxidoreductase activity, acting on the CH-CH group of donors//oxidoreductase activity, acting on the CH-CH group of donors, NAD or NADP as acceptor	GO:0016020	membrane	KOG1638	Steroid reductase	FALSE	-0.184264	1	FALSE	0.35539	0.778413	FALSE	0.0604748	1	FALSE	0.533385	0.539212	FALSE	0.83863	0.169928
Cluster-11149.4374	3.1	3.91	2.35	3.27	2.11	1129	1279020454	XP_022869290.1	993	5.9e-105	(-)-isopiperitenol/(-)-carveol dehydrogenase, mitochondrial-like [Olea europaea var. sylvestris]	EU108699.1	EU108699	198	1.11e-96	Mentha x piperita clone PIPD7 isopiperitenol dehydrogenase mRNA, complete cds	-	-	-	http://www.genome.jp/dbget-bin/www_bget?ko:-	Q5C9I9	848	1.4e-89	(-)-isopiperitenol/(-)-carveol dehydrogenase, mitochondrial OS=Mentha piperita OX=34256 PE=1 SV=1	PF03435//PF02254//PF01408//PF01370//PF01073	Saccharopine dehydrogenase NADP binding domain//TrkA-N domain//oxidoreductase family, NAD-binding Rossmann fold//NAD dependent epimerase/dehydratase family//3-beta hydroxysteroid dehydrogenase/isomerase family	GO:0008209//GO:0006694//GO:0008210//GO:0008207//GO:0055114//GO:0006813	androgen metabolic process//steroid biosynthetic process//estrogen metabolic process//C21-steroid hormone metabolic process//oxidation-reduction process//potassium ion transport	GO:0050662//GO:0016616//GO:0003824//GO:0016491//GO:0003854	obsolete coenzyme binding//oxidoreductase activity, acting on the CH-OH group of donors, NAD or NADP as acceptor//catalytic activity//oxidoreductase activity//3-beta-hydroxy-delta5-steroid dehydrogenase activity	--	--	--	--	FALSE	0.462924	0.676969	FALSE	0.237614	0.937394	FALSE	0.589817	0.433434	FALSE	0.589681	0.513357	FALSE	0.777055	0.27304
Cluster-11149.11417	3.92	5.63	3.55	7.5	3.23	1118	1276249855	PIN08887.1	1002	5.3e-106	1,4-benzoquinone reductase-like [Handroanthus impetiginosus]	XM_011098911.2	XM_011098911	319	6.01e-164	PREDICTED: Sesamum indicum probable NAD(P)H dehydrogenase (quinone) FQR1-like 1 (LOC105176181), mRNA	K03809	wrbA	NAD(P)H dehydrogenase (quinone)	http://www.genome.jp/dbget-bin/www_bget?ko:K03809	O23207	855	2.2e-90	Probable NAD(P)H dehydrogenase (quinone) FQR1-like 2 OS=Arabidopsis thaliana OX=3702 GN=At4g36750 PE=1 SV=1	PF03358//PF00258	NADPH-dependent FMN reductase//Flavodoxin	--	--	GO:0010181//GO:0016491	FMN binding//oxidoreductase activity	--	--	KOG3135	1,4-benzoquinone reductase-like; Trp repressor binding protein-like/protoplast-secreted protein	FALSE	-0.208262	0.979687	FALSE	0.818745	0.259958	FALSE	0.49979	0.506954	FALSE	-0.265282	0.892952	FALSE	0.503313	0.492263
Cluster-11149.26078	92.05	82.51	88.95	158.85	81.37	1632	604305988	EYU25045.1	1735	7.7e-191	hypothetical protein MIMGU_mgv1a008716mg [Erythranthe guttata]	XM_011077947.2	XM_011077947	728	0	PREDICTED: Sesamum indicum sorbitol dehydrogenase (LOC105160529), mRNA	K00008	SORD, gutB	L-iditol 2-dehydrogenase	http://www.genome.jp/dbget-bin/www_bget?ko:K00008	Q9FJ95	1605	3.5e-177	Sorbitol dehydrogenase OS=Arabidopsis thaliana OX=3702 GN=SDH PE=1 SV=1	PF02254//PF07992//PF07562//PF08240//PF03721//PF00107	TrkA-N domain//Pyridine nucleotide-disulphide oxidoreductase//Nine Cysteines Domain of family 3 GPCR//Alcohol dehydrogenase GroES-like domain//UDP-glucose/GDP-mannose dehydrogenase family, NAD binding domain//Zinc-binding dehydrogenase	GO:0007186//GO:0055114//GO:0006813	G protein-coupled receptor signaling pathway//oxidation-reduction process//potassium ion transport	GO:0016491//GO:0051287//GO:0016616//GO:0004930	oxidoreductase activity//NAD binding//oxidoreductase activity, acting on the CH-OH group of donors, NAD or NADP as acceptor//G protein-coupled receptor activity	--	--	KOG0024	Sorbitol dehydrogenase	FALSE	-0.741913	0.244997	FALSE	0.56842	0.406039	FALSE	-0.284269	0.705108	FALSE	-0.113587	1	FALSE	0.404822	0.53171
Cluster-11149.18045	29.87	29.55	35.02	59.24	32.25	848	848888972	XP_012844665.1	1182	5.3e-127	PREDICTED: cinnamoyl-CoA reductase 1-like [Erythranthe guttata]	XM_012989211.1	XM_012989211	403	0	PREDICTED: Erythranthe guttatus cinnamoyl-CoA reductase 1-like (LOC105964707), mRNA	-	-	-	http://www.genome.jp/dbget-bin/www_bget?ko:-	Q9S9N9	587	2e-59	Cinnamoyl-CoA reductase 1 OS=Arabidopsis thaliana OX=3702 GN=CCR1 PE=1 SV=1	PF01370//PF01073	NAD dependent epimerase/dehydratase family//3-beta hydroxysteroid dehydrogenase/isomerase family	GO:0008209//GO:0008210//GO:0006694//GO:0008207//GO:0055114	androgen metabolic process//estrogen metabolic process//steroid biosynthetic process//C21-steroid hormone metabolic process//oxidation-reduction process	GO:0050662//GO:0003824//GO:0016616//GO:0003854	obsolete coenzyme binding//catalytic activity//oxidoreductase activity, acting on the CH-OH group of donors, NAD or NADP as acceptor//3-beta-hydroxy-delta5-steroid dehydrogenase activity	--	--	--	--	FALSE	-0.792905	0.216949	FALSE	0.478602	0.540202	FALSE	-0.425037	0.509898	FALSE	-0.319838	0.806498	FALSE	0.108755	0.987497
Cluster-11149.26961	147.42	288.2	270.62	326.95	249.9	1499	747054626	XP_011073529.1	1604	1.1e-175	malate dehydrogenase [Sesamum indicum]	XM_011093012.2	XM_011093012	799	0	PREDICTED: Sesamum indicum malate dehydrogenase (LOC105171782), mRNA	K00025	MDH1	malate dehydrogenase	http://www.genome.jp/dbget-bin/www_bget?ko:K00025	Q9FSF0	1557	1.2e-171	Malate dehydrogenase OS=Nicotiana tabacum OX=4097 GN=MD1 PE=1 SV=1	PF02866//PF01073//PF00056//PF09830//PF03830	lactate/malate dehydrogenase, alpha/beta C-terminal domain//3-beta hydroxysteroid dehydrogenase/isomerase family//lactate/malate dehydrogenase, NAD binding domain//ATP adenylyltransferase//PTS system sorbose subfamily IIB component	GO:0055114//GO:0008207//GO:0009401//GO:0006144//GO:0006694//GO:0008210//GO:0008643//GO:0008209	oxidation-reduction process//C21-steroid hormone metabolic process//phosphoenolpyruvate-dependent sugar phosphotransferase system//purine nucleobase metabolic process//steroid biosynthetic process//estrogen metabolic process//carbohydrate transport//androgen metabolic process	GO:0003854//GO:0008982//GO:0016491//GO:0016616//GO:0003877	3-beta-hydroxy-delta5-steroid dehydrogenase activity//protein-N(PI)-phosphohistidine-sugar phosphotransferase activity//oxidoreductase activity//oxidoreductase activity, acting on the CH-OH group of donors, NAD or NADP as acceptor//ATP adenylyltransferase activity	GO:0005737//GO:0009357	cytoplasm//protein-N(PI)-phosphohistidine-sugar phosphotransferase complex	KOG1496	Malate dehydrogenase	FALSE	0.0216219	1	FALSE	-0.0091451	1	FALSE	-0.0983055	0.985081	FALSE	-0.476029	0.548095	FALSE	-0.53518	0.365732
Cluster-11149.32938	0.42	0.87	0.97	1.14	0.9	1064	1279066619	XP_022895271.1	292	1.1e-23	malate dehydrogenase, glyoxysomal-like [Olea europaea var. sylvestris]	XM_011101130.2	XM_011101130	99	1.13e-41	PREDICTED: Sesamum indicum malate dehydrogenase, glyoxysomal (LOC105177859), mRNA	-	-	-	http://www.genome.jp/dbget-bin/www_bget?ko:-	P46488	255	7.9e-21	Malate dehydrogenase, glyoxysomal OS=Cucumis sativus OX=3659 GN=MDHG PE=2 SV=1	PF02866	lactate/malate dehydrogenase, alpha/beta C-terminal domain	GO:0055114	oxidation-reduction process	GO:0016616	oxidoreductase activity, acting on the CH-OH group of donors, NAD or NADP as acceptor	--	--	KOG1494	NAD-dependent malate dehydrogenase	FALSE	-0.194232	1	FALSE	-0.0523447	1	FALSE	-0.35629	0.885418	FALSE	-0.772976	0.596946	FALSE	-0.873354	0.531909
Cluster-11149.15249	3.37	3.53	3.88	6.25	3.62	1284	747093161	XP_011094376.1	778	5.7e-80	NADPH-dependent diflavin oxidoreductase 1 isoform X1 [Sesamum indicum]	XM_011096075.2	XM_011096075	416	0	PREDICTED: Sesamum indicum NADPH-dependent diflavin oxidoreductase 1 (LOC105174089), transcript variant X2, mRNA	-	-	-	http://www.genome.jp/dbget-bin/www_bget?ko:-	Q6NPS8	548	1e-54	NADPH-dependent diflavin oxidoreductase 1 OS=Arabidopsis thaliana OX=3702 GN=ATR3 PE=1 SV=1	PF00258	Flavodoxin	--	--	GO:0010181	FMN binding	--	--	KOG1159	NADP-dependent flavoprotein reductase	FALSE	-0.617751	0.456825	FALSE	0.389378	0.716343	FALSE	-0.338929	0.705108	FALSE	-0.220311	0.95567	FALSE	0.119061	1
Cluster-11149.24440	506.69	705.59	477.28	771.85	450.04	2525	1445371583	RDX67972.1	1447	3e-157	Elongation factor 1-alpha, partial [Mucuna pruriens]	XM_011093152.2	XM_011093152	711	0	PREDICTED: Sesamum indicum elongation factor 1-alpha-like (LOC105171896), mRNA	K03231	EEF1A	elongation factor 1-alpha	http://www.genome.jp/dbget-bin/www_bget?ko:K03231	O64937	1426	3.1e-156	Elongation factor 1-alpha OS=Oryza sativa subsp. japonica OX=39947 GN=REFA1 PE=2 SV=2	PF00009//PF02774//PF14987//PF01926//PF03144	Elongation factor Tu GTP binding domain//Semialdehyde dehydrogenase, dimerisation domain//NADH dehydrogenase 1 alpha subcomplex subunit 3//50S ribosome-binding GTPase//Elongation factor Tu domain 2	GO:0008652	cellular amino acid biosynthetic process	GO:0016620//GO:0003924//GO:0046983//GO:0005525	oxidoreductase activity, acting on the aldehyde or oxo group of donors, NAD or NADP as acceptor//GTPase activity//protein dimerization activity//GTP binding	GO:0005743//GO:0005747	mitochondrial inner membrane//mitochondrial respiratory chain complex I	KOG0052	Translation elongation factor EF-1 alpha/Tu	FALSE	0.071425	1	FALSE	0.382116	0.660344	FALSE	0.342758	0.608924	FALSE	0.0681277	1	FALSE	0.400235	0.535875
Cluster-11149.27272	0.43	1.14	1.23	1.53	1.16	1327	1276251932	PIN10503.1	369	1.6e-32	Isocitrate dehydrogenase, gamma subunit [Handroanthus impetiginosus]	XM_011090392.2	XM_011090392	181	3.71e-87	PREDICTED: Sesamum indicum isocitrate dehydrogenase [NAD] regulatory subunit 1, mitochondrial-like (LOC105169847), mRNA	K00030	IDH3	isocitrate dehydrogenase (NAD+)	http://www.genome.jp/dbget-bin/www_bget?ko:K00030	Q8LFC0	347	2.1e-31	Isocitrate dehydrogenase [NAD] regulatory subunit 1, mitochondrial OS=Arabidopsis thaliana OX=3702 GN=IDH1 PE=1 SV=2	PF00180	Isocitrate/isopropylmalate dehydrogenase	GO:0055114	oxidation-reduction process	GO:0016616	oxidoreductase activity, acting on the CH-OH group of donors, NAD or NADP as acceptor	--	--	KOG0784	Isocitrate dehydrogenase, gamma subunit	FALSE	-0.213333	1	FALSE	0.00276283	1	FALSE	-0.320745	0.788328	FALSE	-1.13982	0.244835	FALSE	-1.18541	0.19749
Cluster-11149.35667	23.78	17.58	8.15	5.01	7.92	1229	1276270552	PIN26065.1	1250	1e-134	Reductase [Handroanthus impetiginosus]	DQ384223.1	DQ384223	57	2.92e-18	Orthoclada laxa short-chain dehydrogenase/reductase gene, partial cds	-	-	-	http://www.genome.jp/dbget-bin/www_bget?ko:-	Q94KL7	593	5.9e-60	Secoisolariciresinol dehydrogenase (Fragment) OS=Forsythia intermedia OX=55183 PE=1 SV=1	PF01370//PF01073//PF00056//PF02826	NAD dependent epimerase/dehydratase family//3-beta hydroxysteroid dehydrogenase/isomerase family//lactate/malate dehydrogenase, NAD binding domain//D-isomer specific 2-hydroxyacid dehydrogenase, NAD binding domain	GO:0055114//GO:0008207//GO:0008209//GO:0008210//GO:0006694	oxidation-reduction process//C21-steroid hormone metabolic process//androgen metabolic process//estrogen metabolic process//steroid biosynthetic process	GO:0016616//GO:0003824//GO:0016491//GO:0003854//GO:0051287//GO:0050662	oxidoreductase activity, acting on the CH-OH group of donors, NAD or NADP as acceptor//catalytic activity//oxidoreductase activity//3-beta-hydroxy-delta5-steroid dehydrogenase activity//NAD binding//obsolete coenzyme binding	--	--	--	--	UP	2.02	9.88e-05	FALSE	-1.05719	0.0844002	FALSE	0.847647	0.124464	UP	2.91768	6.21e-09	UP	1.81044	0.000245717
Cluster-11149.9077	15.72	14.28	18.47	17.02	18.09	1708	1276237593	PIN00118.1	1377	2.6e-149	Alcohol dehydrogenase, class V [Handroanthus impetiginosus]	XM_011085136.2	XM_011085136	449	0	PREDICTED: Sesamum indicum 8-hydroxygeraniol dehydrogenase-like (LOC105165971), mRNA	K00083	E1.1.1.195	cinnamyl-alcohol dehydrogenase	http://www.genome.jp/dbget-bin/www_bget?ko:K00083	Q6V4H0	1254	1.8e-136	8-hydroxygeraniol dehydrogenase OS=Catharanthus roseus OX=4058 GN=10HGO PE=1 SV=1	PF02826//PF08240//PF00107//PF03446//PF02737	D-isomer specific 2-hydroxyacid dehydrogenase, NAD binding domain//Alcohol dehydrogenase GroES-like domain//Zinc-binding dehydrogenase//NAD binding domain of 6-phosphogluconate dehydrogenase//3-hydroxyacyl-CoA dehydrogenase, NAD binding domain	GO:0018874//GO:0006633//GO:0006631//GO:0006550//GO:0006552//GO:0006568//GO:0006554//GO:0006574//GO:0055114	benzoate metabolic process//fatty acid biosynthetic process//fatty acid metabolic process//isoleucine catabolic process//leucine catabolic process//tryptophan metabolic process//lysine catabolic process//valine catabolic process//oxidation-reduction process	GO:0003857//GO:0050661//GO:0016491//GO:0051287	3-hydroxyacyl-CoA dehydrogenase activity//NADP binding//oxidoreductase activity//NAD binding	--	--	--	--	FALSE	-0.0500542	1	FALSE	-0.484242	0.536159	FALSE	-0.645042	0.261303	FALSE	0.558976	0.447534	FALSE	0.0247406	1
Cluster-11149.26540	26.61	51.97	50.99	55.98	50.06	1814	1276246595	PIN06389.1	1731	2.5e-190	NAD-dependent malate dehydrogenase [Handroanthus impetiginosus]	XM_011101130.2	XM_011101130	852	0	PREDICTED: Sesamum indicum malate dehydrogenase, glyoxysomal (LOC105177859), mRNA	K00026	MDH2	malate dehydrogenase	http://www.genome.jp/dbget-bin/www_bget?ko:K00026	P19446	1592	1.2e-175	Malate dehydrogenase, glyoxysomal OS=Citrullus lanatus OX=3654 PE=1 SV=1	PF00056//PF01118//PF02866//PF01073	lactate/malate dehydrogenase, NAD binding domain//Semialdehyde dehydrogenase, NAD binding domain//lactate/malate dehydrogenase, alpha/beta C-terminal domain//3-beta hydroxysteroid dehydrogenase/isomerase family	GO:0008209//GO:0006694//GO:0008210//GO:0008207//GO:0055114	androgen metabolic process//steroid biosynthetic process//estrogen metabolic process//C21-steroid hormone metabolic process//oxidation-reduction process	GO:0016620//GO:0016616//GO:0003854//GO:0016491//GO:0051287	oxidoreductase activity, acting on the aldehyde or oxo group of donors, NAD or NADP as acceptor//oxidoreductase activity, acting on the CH-OH group of donors, NAD or NADP as acceptor//3-beta-hydroxy-delta5-steroid dehydrogenase activity//oxidoreductase activity//NAD binding	--	--	KOG1494	NAD-dependent malate dehydrogenase	FALSE	0.0951952	1	FALSE	-0.23546	0.859106	FALSE	-0.251041	0.742009	FALSE	-0.398867	0.672335	FALSE	-0.68432	0.21753
Cluster-11149.32729	2.26	6.93	3.63	10.5	3.62	2233	1173767140	XP_020552753.1	2486	8.7e-278	glucose-6-phosphate 1-dehydrogenase 4, chloroplastic [Sesamum indicum]	XM_020697094.1	XM_020697094	979	0	PREDICTED: Sesamum indicum glucose-6-phosphate 1-dehydrogenase 4, chloroplastic (LOC105172453), mRNA	K00036	G6PD, zwf	glucose-6-phosphate 1-dehydrogenase [EC:1.1.1.49 1.1.1.363]	http://www.genome.jp/dbget-bin/www_bget?ko:K00036	Q93ZW0	1803	5.2e-200	Inactive glucose-6-phosphate 1-dehydrogenase 4, chloroplastic OS=Arabidopsis thaliana OX=3702 GN=G6PD4 PE=1 SV=1	PF02781//PF00479	Glucose-6-phosphate dehydrogenase, C-terminal domain//Glucose-6-phosphate dehydrogenase, NAD binding domain	GO:0006006//GO:0006749//GO:0055114//GO:0006098	glucose metabolic process//glutathione metabolic process//oxidation-reduction process//pentose-phosphate shunt	GO:0050661//GO:0016614//GO:0004345	NADP binding//oxidoreductase activity, acting on CH-OH group of donors//glucose-6-phosphate dehydrogenase activity	--	--	KOG0563	Glucose-6-phosphate 1-dehydrogenase	FALSE	-0.398928	0.689567	FALSE	1.13951	0.043387	FALSE	0.629829	0.291127	DOWN	-1.5403	0.00412829	FALSE	-0.450732	0.53009
Cluster-16530.1	2.08	3.19	1.26	0.46	1.28	806	747051337	XP_011071756.1	962	1.6e-101	(-)-isopiperitenol/(-)-carveol dehydrogenase, mitochondrial-like [Sesamum indicum]	XM_011073454.2	XM_011073454	335	5.46e-173	PREDICTED: Sesamum indicum (-)-isopiperitenol/(-)-carveol dehydrogenase, mitochondrial-like (LOC105157144), mRNA	-	-	-	http://www.genome.jp/dbget-bin/www_bget?ko:-	Q5C9I9	816	5.3e-86	(-)-isopiperitenol/(-)-carveol dehydrogenase, mitochondrial OS=Mentha piperita OX=34256 PE=1 SV=1	PF01370//PF01073//PF03435//PF01177	NAD dependent epimerase/dehydratase family//3-beta hydroxysteroid dehydrogenase/isomerase family//Saccharopine dehydrogenase NADP binding domain//Asp/Glu/Hydantoin racemase	GO:0006694//GO:0008210//GO:0008209//GO:0008207//GO:0055114//GO:0006807	steroid biosynthetic process//estrogen metabolic process//androgen metabolic process//C21-steroid hormone metabolic process//oxidation-reduction process//nitrogen compound metabolic process	GO:0050662//GO:0016491//GO:0003854//GO:0016616//GO:0036361//GO:0003824	obsolete coenzyme binding//oxidoreductase activity//3-beta-hydroxy-delta5-steroid dehydrogenase activity//oxidoreductase activity, acting on the CH-OH group of donors, NAD or NADP as acceptor//racemase activity, acting on amino acids and derivatives//catalytic activity	--	--	--	--	UP	2.98471	0.000232667	FALSE	-1.86021	0.0971547	FALSE	1.01237	0.195518	UP	2.8178	0.00127538	FALSE	0.908791	0.293937
Cluster-11149.13905	1.71	5.29	3.69	1.99	3.76	1565	1600664099	TEY46490.1	1497	2.9e-163	arogenate dehydrogenase (NADP+), plant [Salvia splendens]	XM_011085775.2	XM_011085775	567	0	PREDICTED: Sesamum indicum arogenate dehydrogenase 2, chloroplastic (LOC105166429), transcript variant X3, mRNA	K15227	TYRAAT	arogenate dehydrogenase (NADP+), plant	http://www.genome.jp/dbget-bin/www_bget?ko:K15227	Q9LMR3	1114	2.9e-120	Arogenate dehydrogenase 2, chloroplastic OS=Arabidopsis thaliana OX=3702 GN=TYRAAT2 PE=1 SV=1	PF03446//PF02153//PF02826//PF01210//PF02737//PF01408//PF00208	NAD binding domain of 6-phosphogluconate dehydrogenase//Prephenate dehydrogenase//D-isomer specific 2-hydroxyacid dehydrogenase, NAD binding domain//NAD-dependent glycerol-3-phosphate dehydrogenase N-terminus//3-hydroxyacyl-CoA dehydrogenase, NAD binding domain//oxidoreductase family, NAD-binding Rossmann fold//Glutamate/Leucine/Phenylalanine/Valine dehydrogenase	GO:0006633//GO:0006550//GO:0006568//GO:0006552//GO:0006554//GO:0000162//GO:0046168//GO:0006571//GO:0055114//GO:0006520//GO:0018874//GO:0006631//GO:0009094//GO:0006574	fatty acid biosynthetic process//isoleucine catabolic process//tryptophan metabolic process//leucine catabolic process//lysine catabolic process//tryptophan biosynthetic process//glycerol-3-phosphate catabolic process//tyrosine biosynthetic process//oxidation-reduction process//cellular amino acid metabolic process//benzoate metabolic process//fatty acid metabolic process//L-phenylalanine biosynt…	GO:0004665//GO:0008977//GO:0051287//GO:0050661//GO:0003857//GO:0016491//GO:0016616	prephenate dehydrogenase (NADP+) activity//prephenate dehydrogenase (NAD+) activity//NAD binding//NADP binding//3-hydroxyacyl-CoA dehydrogenase activity//oxidoreductase activity//oxidoreductase activity, acting on the CH-OH group of donors, NAD or NADP as acceptor	--	--	--	--	FALSE	1.61136	0.00527627	FALSE	-1.31395	0.0313819	FALSE	0.186596	0.875583	FALSE	0.452046	0.745764	FALSE	-0.911462	0.147838
Cluster-11149.28268	2.76	10.85	7.09	8.9	7.23	2669	1173791207	XP_020549261.1	1995	9e-221	probable glycerol-3-phosphate dehydrogenase [NAD(+)] 1, cytosolic [Sesamum indicum]	XM_020693602.1	XM_020693602	838	0	PREDICTED: Sesamum indicum probable glycerol-3-phosphate dehydrogenase [NAD(+)] 1, cytosolic (LOC105159848), transcript variant X2, mRNA	K00006	GPD1	glycerol-3-phosphate dehydrogenase (NAD+)	http://www.genome.jp/dbget-bin/www_bget?ko:K00006	Q8S0G4	1828	7.9e-203	Probable glycerol-3-phosphate dehydrogenase [NAD(+)] 1, cytosolic OS=Oryza sativa subsp. japonica OX=39947 GN=Os01g0939600 PE=2 SV=1	PF07479//PF01210	NAD-dependent glycerol-3-phosphate dehydrogenase C-terminus//NAD-dependent glycerol-3-phosphate dehydrogenase N-terminus	GO:0055114//GO:0046486//GO:0006072//GO:0046168//GO:0005975	oxidation-reduction process//glycerolipid metabolic process//glycerol-3-phosphate metabolic process//glycerol-3-phosphate catabolic process//carbohydrate metabolic process	GO:0004367//GO:0016616//GO:0051287	glycerol-3-phosphate dehydrogenase [NAD+] activity//oxidoreductase activity, acting on the CH-OH group of donors, NAD or NADP as acceptor//NAD binding	GO:0009331	glycerol-3-phosphate dehydrogenase complex	--	--	FALSE	0.485789	0.566119	FALSE	-0.0963276	1	FALSE	0.278691	0.705108	FALSE	-1.01367	0.0896701	FALSE	-1.15989	0.0275445
Cluster-11149.25489	15.12	28.94	20.51	29.76	20.92	1651	747051234	XP_011071705.1	1760	9.9e-194	malate dehydrogenase, chloroplastic-like [Sesamum indicum]	XM_011088940.2	XM_011088940	759	0	PREDICTED: Sesamum indicum malate dehydrogenase, chloroplastic (LOC105168789), transcript variant X2, mRNA	K00026	MDH2	malate dehydrogenase	http://www.genome.jp/dbget-bin/www_bget?ko:K00026	Q9SN86	1449	4.3e-159	Malate dehydrogenase, chloroplastic OS=Arabidopsis thaliana OX=3702 GN=At3g47520 PE=1 SV=1	PF00056//PF01073//PF02866	lactate/malate dehydrogenase, NAD binding domain//3-beta hydroxysteroid dehydrogenase/isomerase family//lactate/malate dehydrogenase, alpha/beta C-terminal domain	GO:0008210//GO:0006694//GO:0008209//GO:0055114//GO:0008207	estrogen metabolic process//steroid biosynthetic process//androgen metabolic process//oxidation-reduction process//C21-steroid hormone metabolic process	GO:0016491//GO:0003854//GO:0016616	oxidoreductase activity//3-beta-hydroxy-delta5-steroid dehydrogenase activity//oxidoreductase activity, acting on the CH-OH group of donors, NAD or NADP as acceptor	--	--	KOG1494	NAD-dependent malate dehydrogenase	FALSE	0.162424	1	FALSE	0.112022	1	FALSE	0.163675	0.889652	FALSE	-0.303084	0.806498	FALSE	-0.241055	0.784983
Cluster-11149.4644	0	0	0.3	0	0.31	386	747068296	XP_011080899.1	279	1.2e-22	respiratory burst oxidase homolog protein A [Sesamum indicum]	XM_011082597.2	XM_011082597	158	6.17e-75	PREDICTED: Sesamum indicum respiratory burst oxidase homolog protein A (LOC105164049), mRNA	-	-	-	http://www.genome.jp/dbget-bin/www_bget?ko:-	Q948U0	263	3.4e-22	Respiratory burst oxidase homolog protein A OS=Solanum tuberosum OX=4113 GN=RBOHA PE=1 SV=1	PF08414	Respiratory burst NADPH oxidase	GO:0006979//GO:0055114//GO:0006804	response to oxidative stress//oxidation-reduction process//obsolete peroxidase reaction	GO:0004601//GO:0050664	peroxidase activity//oxidoreductase activity, acting on NAD(P)H, oxygen as acceptor	--	--	--	--	FALSE	-5.13e-15	1	FALSE	-3.3742	1	FALSE	-3.29695	1	FALSE	0	1	FALSE	-3.08254	1
Cluster-11149.23720	13.51	33.44	19.14	45.04	19.92	2316	747053145	XP_011072722.1	2537	1.1e-283	D-3-phosphoglycerate dehydrogenase 2, chloroplastic [Sesamum indicum]	XM_011074420.2	XM_011074420	1064	0	PREDICTED: Sesamum indicum D-3-phosphoglycerate dehydrogenase 2, chloroplastic (LOC105157901), mRNA	K00058	serA, PHGDH	D-3-phosphoglycerate dehydrogenase	http://www.genome.jp/dbget-bin/www_bget?ko:K00058	O04130	2238	2e-250	D-3-phosphoglycerate dehydrogenase 2, chloroplastic OS=Arabidopsis thaliana OX=3702 GN=PGDH2 PE=1 SV=2	PF03446//PF00522//PF00389//PF12443//PF02826	NAD binding domain of 6-phosphogluconate dehydrogenase//VPR/VPX protein//D-isomer specific 2-hydroxyacid dehydrogenase, catalytic domain//AT-hook-containing transcription factor//D-isomer specific 2-hydroxyacid dehydrogenase, NAD binding domain	GO:0001837//GO:0055114//GO:0019058	epithelial to mesenchymal transition//oxidation-reduction process//viral life cycle	GO:0050661//GO:0000978//GO:0051287//GO:0016616//GO:0001228	NADP binding//RNA polymerase II cis-regulatory region sequence-specific DNA binding//NAD binding//oxidoreductase activity, acting on the CH-OH group of donors, NAD or NADP as acceptor//DNA-binding transcription activator activity, RNA polymerase II-specific	GO:0042025	host cell nucleus	KOG0068	D-3-phosphoglycerate dehydrogenase, D-isomer-specific 2-hydroxy acid dehydrogenase superfamily	FALSE	-0.228316	0.914693	FALSE	0.78078	0.200169	FALSE	0.441687	0.473075	FALSE	-1.06215	0.0568505	FALSE	-0.331373	0.657281
Cluster-11149.24423	20.85	80.36	47.31	45.21	49.39	3292	1276261545	PIN18375.1	1576	4.3e-172	Glyceraldehyde 3-phosphate dehydrogenase [Handroanthus impetiginosus]	XM_011100526.2	XM_011100526	593	0	PREDICTED: Sesamum indicum glyceraldehyde-3-phosphate dehydrogenase, cytosolic-like (LOC105177390), mRNA	-	-	-	http://www.genome.jp/dbget-bin/www_bget?ko:-	P26519	1496	3.1e-164	Glyceraldehyde-3-phosphate dehydrogenase, cytosolic OS=Petroselinum crispum OX=4043 GN=GAPC PE=2 SV=1	PF01113//PF00863//PF06699//PF02826//PF02800//PF00044	Dihydrodipicolinate reductase, N-terminus//Peptidase family C4//GPI biosynthesis protein family Pig-F//D-isomer specific 2-hydroxyacid dehydrogenase, NAD binding domain//Glyceraldehyde 3-phosphate dehydrogenase, C-terminal domain//Glyceraldehyde 3-phosphate dehydrogenase, NAD binding domain	GO:0006506//GO:0009089//GO:0009085//GO:0006508//GO:0055114	GPI anchor biosynthetic process//lysine biosynthetic process via diaminopimelate//lysine biosynthetic process//proteolysis//oxidation-reduction process	GO:0016620//GO:0051287//GO:0008234//GO:0008839	oxidoreductase activity, acting on the aldehyde or oxo group of donors, NAD or NADP as acceptor//NAD binding//cysteine-type peptidase activity//4-hydroxy-tetrahydrodipicolinate reductase	GO:0005789	endoplasmic reticulum membrane	KOG0657	Glyceraldehyde 3-phosphate dehydrogenase	FALSE	1.03	0.0686667	FALSE	-0.523313	0.472037	FALSE	0.395736	0.53284	FALSE	-0.440665	0.593549	FALSE	-1.01397	0.0455346
Cluster-11149.32973	3.27	4.65	3.71	5.63	3.89	3168	747073788	XP_011083866.1	500	2.4e-47	uncharacterized protein LOC105166261 isoform X2 [Sesamum indicum]	XM_011085563.2	XM_011085563	199	8.86e-97	PREDICTED: Sesamum indicum putative dihydroflavonol 4-reductase (LOC105166261), transcript variant X1, mRNA	-	-	-	http://www.genome.jp/dbget-bin/www_bget?ko:-	P51108	129	9.6e-06	Dihydroflavonol 4-reductase OS=Zea mays OX=4577 GN=A1 PE=3 SV=1	PF01370//PF01073	NAD dependent epimerase/dehydratase family//3-beta hydroxysteroid dehydrogenase/isomerase family	GO:0055114//GO:0008207//GO:0008209//GO:0006694//GO:0008210	oxidation-reduction process//C21-steroid hormone metabolic process//androgen metabolic process//steroid biosynthetic process//estrogen metabolic process	GO:0016616//GO:0003824//GO:0003854//GO:0050662	oxidoreductase activity, acting on the CH-OH group of donors, NAD or NADP as acceptor//catalytic activity//3-beta-hydroxy-delta5-steroid dehydrogenase activity//obsolete coenzyme binding	--	--	--	--	FALSE	-0.0766063	1	FALSE	0.138235	1	FALSE	-0.0491085	1	FALSE	-0.107822	1	FALSE	-0.0195773	1
Cluster-11149.15233	1.32	3.42	3.82	7.8	4.08	6589	1527465183	XP_027100870.1	1942	3.1e-214	uncharacterized protein LOC113719906 [Coffea arabica]	XM_011099121.2	XM_011099121	355	0	PREDICTED: Sesamum indicum isocitrate dehydrogenase [NADP], chloroplastic/mitochondrial (LOC105176349), transcript variant X2, mRNA	-	-	-	http://www.genome.jp/dbget-bin/www_bget?ko:-	Q8LPJ5	1032	3.9e-110	Isocitrate dehydrogenase [NADP], chloroplastic/mitochondrial OS=Arabidopsis thaliana OX=3702 GN=At5g14590 PE=1 SV=1	PF00180//PF17053//PF10384//PF00098	Isocitrate/isopropylmalate dehydrogenase//Genetic interactor of prohibitin 5//Centromere protein Scm3//Zinc knuckle	GO:0055114//GO:0000002	oxidation-reduction process//mitochondrial genome maintenance	GO:0003676//GO:0016616//GO:0042393//GO:0008270	nucleic acid binding//oxidoreductase activity, acting on the CH-OH group of donors, NAD or NADP as acceptor//histone binding//zinc ion binding	GO:0005634	nucleus	--	--	FALSE	-0.988871	0.0927369	FALSE	0.540671	0.455096	FALSE	-0.55894	0.342405	DOWN	-1.88525	0.000185452	FALSE	-1.39449	0.0058075
Cluster-11149.20175	9.2	13.46	10.65	26.59	11.52	1993	848855150	XP_012851314.1	1975	1.4e-218	PREDICTED: probable mitochondrial saccharopine dehydrogenase-like oxidoreductase At5g39410 [Erythranthe guttata]	XM_011100390.2	XM_011100390	788	0	PREDICTED: Sesamum indicum probable mitochondrial saccharopine dehydrogenase-like oxidoreductase At5g39410 (LOC105177294), mRNA	-	-	-	http://www.genome.jp/dbget-bin/www_bget?ko:-	Q8LGI2	1626	1.6e-179	Probable mitochondrial saccharopine dehydrogenase-like oxidoreductase At5g39410 OS=Arabidopsis thaliana OX=3702 GN=At5g39410 PE=1 SV=2	PF03435//PF00216	Saccharopine dehydrogenase NADP binding domain//Bacterial DNA-binding protein	GO:0055114	oxidation-reduction process	GO:0016491//GO:0003677	oxidoreductase activity//DNA binding	--	--	KOG2733	Uncharacterized membrane protein	FALSE	-0.779946	0.224142	FALSE	0.809907	0.185141	FALSE	-0.0807892	1	FALSE	-0.856473	0.152835	FALSE	-0.0965682	1
Cluster-11149.22965	88.53	62.99	67.19	78.53	74.84	932	1276248045	PIN07482.1	454	1.5e-42	Flavonol reductase/cinnamoyl-CoA reductase [Handroanthus impetiginosus]	AM159095.1	AM159095	65	7.86e-23	Plantago major mRNA for cinnamoyl alcohol dehydrogenase (cad2 gene)	-	-	-	http://www.genome.jp/dbget-bin/www_bget?ko:-	Q500U8	311	2.2e-27	Tetraketide alpha-pyrone reductase 1 OS=Arabidopsis thaliana OX=3702 GN=TKPR1 PE=1 SV=1	PF00208//PF08288//PF01370//PF01073	Glutamate/Leucine/Phenylalanine/Valine dehydrogenase//PIGA (GPI anchor biosynthesis)//NAD dependent epimerase/dehydratase family//3-beta hydroxysteroid dehydrogenase/isomerase family	GO:0006520//GO:0008207//GO:0055114//GO:0006506//GO:0008210//GO:0006694//GO:0008209	cellular amino acid metabolic process//C21-steroid hormone metabolic process//oxidation-reduction process//GPI anchor biosynthetic process//estrogen metabolic process//steroid biosynthetic process//androgen metabolic process	GO:0016491//GO:0003854//GO:0003824//GO:0016616//GO:0050662	oxidoreductase activity//3-beta-hydroxy-delta5-steroid dehydrogenase activity//catalytic activity//oxidoreductase activity, acting on the CH-OH group of donors, NAD or NADP as acceptor//obsolete coenzyme binding	--	--	--	--	FALSE	-0.109366	1	FALSE	-0.328707	0.743055	FALSE	-0.548839	0.347512	FALSE	0.841886	0.156117	FALSE	0.46317	0.449875
Cluster-11149.23064	34.11	52.02	25.98	66.61	29.18	2273	604333284	EYU37635.1	1426	7.3e-155	hypothetical protein MIMGU_mgv1a003216mg [Erythranthe guttata]	XM_020697327.1	XM_020697327	635	0	PREDICTED: Sesamum indicum D-3-phosphoglycerate dehydrogenase 1, chloroplastic (LOC105172836), mRNA	K00058	serA, PHGDH	D-3-phosphoglycerate dehydrogenase	http://www.genome.jp/dbget-bin/www_bget?ko:K00058	O49485	1213	1.4e-131	D-3-phosphoglycerate dehydrogenase 1, chloroplastic OS=Arabidopsis thaliana OX=3702 GN=PGDH1 PE=1 SV=1	PF03446//PF03720//PF02826//PF00389	NAD binding domain of 6-phosphogluconate dehydrogenase//UDP-glucose/GDP-mannose dehydrogenase family, UDP binding domain//D-isomer specific 2-hydroxyacid dehydrogenase, NAD binding domain//D-isomer specific 2-hydroxyacid dehydrogenase, catalytic domain	GO:0055114	oxidation-reduction process	GO:0016616//GO:0050661//GO:0051287	oxidoreductase activity, acting on the CH-OH group of donors, NAD or NADP as acceptor//NADP binding//NAD binding	--	--	KOG0068	D-3-phosphoglycerate dehydrogenase, D-isomer-specific 2-hydroxy acid dehydrogenase superfamily	FALSE	-0.15534	1	FALSE	0.79424	0.188068	FALSE	0.52812	0.371261	FALSE	-0.290326	0.806498	FALSE	0.453899	0.461357
Cluster-11149.21850	10.74	15.35	14.51	25.84	16.89	4516	1276249856	PIN08888.1	1460	1.7e-158	Xaa-Pro aminopeptidase [Handroanthus impetiginosus]	XM_012999599.1	XM_012999599	550	0	PREDICTED: Erythranthe guttatus probable Xaa-Pro aminopeptidase P (LOC105974485), mRNA	K01262	pepP	Xaa-Pro aminopeptidase	http://www.genome.jp/dbget-bin/www_bget?ko:K01262	F4JQH3	1137	1.8e-122	Aminopeptidase P1 OS=Arabidopsis thaliana OX=3702 GN=APP1 PE=1 SV=1	PF01222//PF01321	Ergosterol biosynthesis ERG4/ERG24 family//Creatinase/Prolidase N-terminal domain	GO:0016126	sterol biosynthetic process	GO:0016628//GO:0016787	oxidoreductase activity, acting on the CH-CH group of donors, NAD or NADP as acceptor//hydrolase activity	GO:0016020	membrane	KOG2413	Xaa-Pro aminopeptidase	FALSE	-0.552137	0.46101	FALSE	0.217943	0.884703	FALSE	-0.444965	0.465782	FALSE	-0.590109	0.388057	FALSE	-0.422165	0.512226
Cluster-11149.31937	3.57	5.53	10.85	11.68	12.96	646	1600635708	TEY21115.1	354	4.2e-31	cinnamoyl-CoA reductase [Salvia splendens]	EU338487.1	EU338487	201	1.34e-98	Paulownia sp. ZKC-2008 cinnamoyl-CoA reductase mRNA, complete cds	K09753	CCR	cinnamoyl-CoA reductase	http://www.genome.jp/dbget-bin/www_bget?ko:K09753	Q9S9N9	317	3.1e-28	Cinnamoyl-CoA reductase 1 OS=Arabidopsis thaliana OX=3702 GN=CCR1 PE=1 SV=1	PF01073//PF01370	3-beta hydroxysteroid dehydrogenase/isomerase family//NAD dependent epimerase/dehydratase family	GO:0008210//GO:0006694//GO:0008209//GO:0055114//GO:0008207	estrogen metabolic process//steroid biosynthetic process//androgen metabolic process//oxidation-reduction process//C21-steroid hormone metabolic process	GO:0050662//GO:0003854//GO:0016616//GO:0003824	obsolete coenzyme binding//3-beta-hydroxy-delta5-steroid dehydrogenase activity//oxidoreductase activity, acting on the CH-OH group of donors, NAD or NADP as acceptor//catalytic activity	--	--	--	--	FALSE	-0.86	0.251756	FALSE	-0.548245	0.528764	FALSE	-1.51848	0.00702217	FALSE	-1.04335	0.15569	FALSE	-1.64092	0.00565405
Cluster-11149.22964	75.77	60.26	59.51	88.45	71.09	2531	1276248045	PIN07482.1	554	1.1e-53	Flavonol reductase/cinnamoyl-CoA reductase [Handroanthus impetiginosus]	XM_023017867.1	XM_023017867	45	2.86e-11	PREDICTED: Olea europaea var. sylvestris cinnamoyl-CoA reductase 1-like (LOC111392506), mRNA	-	-	-	http://www.genome.jp/dbget-bin/www_bget?ko:-	Q500U8	329	5e-29	Tetraketide alpha-pyrone reductase 1 OS=Arabidopsis thaliana OX=3702 GN=TKPR1 PE=1 SV=1	PF01073//PF01370	3-beta hydroxysteroid dehydrogenase/isomerase family//NAD dependent epimerase/dehydratase family	GO:0008210//GO:0006694//GO:0008209//GO:0008207//GO:0055114	estrogen metabolic process//steroid biosynthetic process//androgen metabolic process//C21-steroid hormone metabolic process//oxidation-reduction process	GO:0050662//GO:0003854//GO:0016616//GO:0003824	obsolete coenzyme binding//3-beta-hydroxy-delta5-steroid dehydrogenase activity//oxidoreductase activity, acting on the CH-OH group of donors, NAD or NADP as acceptor//catalytic activity	--	--	--	--	FALSE	-0.352703	0.744832	FALSE	-0.0808938	1	FALSE	-0.544375	0.347762	FALSE	0.452243	0.57061	FALSE	0.32134	0.665454
Cluster-11149.28610	6.53	8.63	5.88	12.74	7.08	3526	747046950	XP_011101879.1	1367	7.9e-148	small RNA degrading nuclease 5 isoform X2 [Sesamum indicum]	XM_011103577.2	XM_011103577	567	0	PREDICTED: Sesamum indicum small RNA degrading nuclease 5 (LOC105179911), transcript variant X2, mRNA	K14570	REX1, REXO1, RNH70	RNA exonuclease 1	http://www.genome.jp/dbget-bin/www_bget?ko:K14570	Q8L7M4	1088	6.7e-117	Small RNA degrading nuclease 5 OS=Arabidopsis thaliana OX=3702 GN=SDN5 PE=2 SV=2	PF00479//PF00657//PF03581//PF11093//PF00210	Glucose-6-phosphate dehydrogenase, NAD binding domain//GDSL-like Lipase/Acylhydrolase//Herpesvirus UL33-like protein//Mitochondrial export protein Som1//Ferritin-like domain	GO:0006879//GO:0019073//GO:0006006//GO:0055114	cellular iron ion homeostasis//viral DNA genome packaging//glucose metabolic process//oxidation-reduction process	GO:0050661//GO:0016614//GO:0008199//GO:0016788	NADP binding//oxidoreductase activity, acting on CH-OH group of donors//ferric iron binding//hydrolase activity, acting on ester bonds	GO:0042720	mitochondrial inner membrane peptidase complex	KOG2248	3'-5' exonuclease	FALSE	-0.361471	0.742676	FALSE	0.450327	0.569304	FALSE	-0.0219038	1	FALSE	-0.286691	0.806498	FALSE	0.113627	0.983288
Cluster-11149.36475	4.29	8.54	8.85	13.77	10.72	2012	747093699	XP_011094667.1	1790	4e-197	3-isopropylmalate dehydrogenase, chloroplastic [Sesamum indicum]	XM_011096365.2	XM_011096365	781	0	PREDICTED: Sesamum indicum 3-isopropylmalate dehydrogenase, chloroplastic (LOC105174309), mRNA	K00030	IDH3	isocitrate dehydrogenase (NAD+)	http://www.genome.jp/dbget-bin/www_bget?ko:K00030	Q945K7	1586	6.9e-175	Isocitrate dehydrogenase [NAD] catalytic subunit 5, mitochondrial OS=Arabidopsis thaliana OX=3702 GN=IDH5 PE=1 SV=1	PF00180	Isocitrate/isopropylmalate dehydrogenase	GO:0055114	oxidation-reduction process	GO:0016616	oxidoreductase activity, acting on the CH-OH group of donors, NAD or NADP as acceptor	--	--	KOG0785	Isocitrate dehydrogenase, alpha subunit	FALSE	-0.486579	0.566119	FALSE	-0.0360485	1	FALSE	-0.633353	0.273386	FALSE	-1.00641	0.0907406	FALSE	-1.09236	0.0385998
Cluster-11149.18288	9.8	9.23	10.69	15.88	12.95	1500	604316176	EYU28574.1	1097	6.8e-117	hypothetical protein MIMGU_mgv1a011919mg [Erythranthe guttata]	XM_011098911.2	XM_011098911	481	0	PREDICTED: Sesamum indicum probable NAD(P)H dehydrogenase (quinone) FQR1-like 1 (LOC105176181), mRNA	K03809	wrbA	NAD(P)H dehydrogenase (quinone)	http://www.genome.jp/dbget-bin/www_bget?ko:K03809	O23207	867	1.2e-91	Probable NAD(P)H dehydrogenase (quinone) FQR1-like 2 OS=Arabidopsis thaliana OX=3702 GN=At4g36750 PE=1 SV=1	PF00258//PF03358	Flavodoxin//NADPH-dependent FMN reductase	--	--	GO:0010181//GO:0016491	FMN binding//oxidoreductase activity	--	--	KOG3135	1,4-benzoquinone reductase-like; Trp repressor binding protein-like/protoplast-secreted protein	FALSE	-0.578977	0.447196	FALSE	-0.10269	1	FALSE	-0.79237	0.151798	FALSE	-0.0222989	1	FALSE	-0.174969	0.89369
Cluster-11149.17390	15.95	38.32	33.65	41.04	40.8	1232	1527522452	XP_027111029.1	1172	1.1e-125	UDP-glucuronic acid decarboxylase 6-like isoform X1 [Coffea arabica]	XM_011095506.2	XM_011095506	540	0	PREDICTED: Sesamum indicum UDP-glucuronic acid decarboxylase 6-like (LOC105173665), transcript variant X1, mRNA	K08678	UXS1, uxs	UDP-glucuronate decarboxylase	http://www.genome.jp/dbget-bin/www_bget?ko:K08678	Q9ZV36	1097	2.1e-118	UDP-glucuronic acid decarboxylase 6 OS=Arabidopsis thaliana OX=3702 GN=UXS6 PE=2 SV=1	PF01370//PF01073//PF03435//PF02254	NAD dependent epimerase/dehydratase family//3-beta hydroxysteroid dehydrogenase/isomerase family//Saccharopine dehydrogenase NADP binding domain//TrkA-N domain	GO:0008207//GO:0055114//GO:0006813//GO:0008210//GO:0006694//GO:0008209	C21-steroid hormone metabolic process//oxidation-reduction process//potassium ion transport//estrogen metabolic process//steroid biosynthetic process//androgen metabolic process	GO:0016491//GO:0003854//GO:0016616//GO:0003824//GO:0050662	oxidoreductase activity//3-beta-hydroxy-delta5-steroid dehydrogenase activity//oxidoreductase activity, acting on the CH-OH group of donors, NAD or NADP as acceptor//catalytic activity//obsolete coenzyme binding	--	--	KOG1429	dTDP-glucose 4-6-dehydratase/UDP-glucuronic acid decarboxylase	FALSE	0.106052	1	FALSE	-0.388549	0.660889	FALSE	-0.393263	0.545337	FALSE	-0.691677	0.294996	FALSE	-1.13018	0.0262911
Cluster-11149.27733	42.64	21.04	31.29	38.96	37.97	4721	747045352	XP_011093542.1	765	6.7e-78	anthocyanidin reductase ((2S)-flavan-3-ol-forming) [Sesamum indicum]	XM_011095240.2	XM_011095240	332	1.54e-170	PREDICTED: Sesamum indicum anthocyanidin reductase ((2S)-flavan-3-ol-forming) (LOC105173484), mRNA	-	-	-	http://www.genome.jp/dbget-bin/www_bget?ko:-	Q5XLY0	282	2.6e-23	Putative anthocyanidin reductase OS=Ginkgo biloba OX=3311 PE=2 SV=1	PF00335//PF03106//PF01073//PF01370//PF06720	Tetraspanin family//WRKY DNA -binding domain//3-beta hydroxysteroid dehydrogenase/isomerase family//NAD dependent epimerase/dehydratase family//Bacteriophage phi-29 early protein GP16.7	GO:0039693//GO:0008207//GO:0055114//GO:0008210//GO:0006694//GO:0008209//GO:0006355	viral DNA genome replication//C21-steroid hormone metabolic process//oxidation-reduction process//estrogen metabolic process//steroid biosynthetic process//androgen metabolic process//regulation of transcription, DNA-templated	GO:0003854//GO:0016616//GO:0003824//GO:0003700//GO:0050662//GO:0043565	3-beta-hydroxy-delta5-steroid dehydrogenase activity//oxidoreductase activity, acting on the CH-OH group of donors, NAD or NADP as acceptor//catalytic activity//DNA-binding transcription factor activity//obsolete coenzyme binding//sequence-specific DNA binding	GO:0005667//GO:0016021	transcription regulator complex//integral component of membrane	--	--	FALSE	-0.689	0.295652	FALSE	-0.358921	0.702504	FALSE	-1.15914	0.018758	FALSE	0.807133	0.178557	FALSE	0.398204	0.541545
Cluster-11149.25888	164.74	253.69	169.69	286.02	206.28	2792	1276266609	PIN22680.1	1173	1.9e-125	S-adenosylhomocysteine hydrolase [Handroanthus impetiginosus]	XM_011103754.2	XM_011103754	523	0	PREDICTED: Sesamum indicum adenosylhomocysteinase (LOC105180104), mRNA	K01251	E3.3.1.1, ahcY	adenosylhomocysteinase	http://www.genome.jp/dbget-bin/www_bget?ko:K01251	P93253	1139	6.5e-123	Adenosylhomocysteinase OS=Mesembryanthemum crystallinum OX=3544 GN=SAHH PE=2 SV=1	PF02737//PF02826//PF02254//PF02882	3-hydroxyacyl-CoA dehydrogenase, NAD binding domain//D-isomer specific 2-hydroxyacid dehydrogenase, NAD binding domain//TrkA-N domain//Tetrahydrofolate dehydrogenase/cyclohydrolase, NAD(P)-binding domain	GO:0006574//GO:0046487//GO:0018874//GO:0006631//GO:0006813//GO:0055114//GO:0006554//GO:0006552//GO:0009396//GO:0006568//GO:0006550//GO:0006633	valine catabolic process//glyoxylate metabolic process//benzoate metabolic process//fatty acid metabolic process//potassium ion transport//oxidation-reduction process//lysine catabolic process//leucine catabolic process//folic acid-containing compound biosynthetic process//tryptophan metabolic process//isoleucine catabolic process//fatty acid biosynthetic process	GO:0004488//GO:0016491//GO:0003857//GO:0051287	methylenetetrahydrofolate dehydrogenase (NADP+) activity//oxidoreductase activity//3-hydroxyacyl-CoA dehydrogenase activity//NAD binding	--	--	KOG1370	S-adenosylhomocysteine hydrolase	FALSE	0.027556	1	FALSE	0.0754235	1	FALSE	-0.00780364	1	FALSE	-0.120241	1	FALSE	-0.0948256	1
Cluster-11149.39881	2.39	3.03	4.58	5.57	5.64	5182	747044263	XP_011088143.1	1028	2.4e-108	probable glycerol-3-phosphate dehydrogenase [NAD(+)] 1, cytosolic [Sesamum indicum]	XM_011089841.2	XM_011089841	438	0	PREDICTED: Sesamum indicum probable glycerol-3-phosphate dehydrogenase [NAD(+)] 1, cytosolic (LOC105169450), mRNA	K00006	GPD1	glycerol-3-phosphate dehydrogenase (NAD+)	http://www.genome.jp/dbget-bin/www_bget?ko:K00006	Q8S0G4	914	1.5e-96	Probable glycerol-3-phosphate dehydrogenase [NAD(+)] 1, cytosolic OS=Oryza sativa subsp. japonica OX=39947 GN=Os01g0939600 PE=2 SV=1	PF01210//PF07479	NAD-dependent glycerol-3-phosphate dehydrogenase N-terminus//NAD-dependent glycerol-3-phosphate dehydrogenase C-terminus	GO:0046168//GO:0006072//GO:0046486//GO:0055114//GO:0005975	glycerol-3-phosphate catabolic process//glycerol-3-phosphate metabolic process//glycerolipid metabolic process//oxidation-reduction process//carbohydrate metabolic process	GO:0051287//GO:0016616//GO:0004367	NAD binding//oxidoreductase activity, acting on the CH-OH group of donors, NAD or NADP as acceptor//glycerol-3-phosphate dehydrogenase [NAD+] activity	GO:0009331	glycerol-3-phosphate dehydrogenase complex	--	--	FALSE	-0.679	0.333176	FALSE	-0.415691	0.622538	FALSE	-1.2059	0.0167104	FALSE	-0.540006	0.486024	FALSE	-1.00564	0.0561193
Cluster-11149.22660	5.28	8.78	7.89	24.51	9.87	1806	1276254490	PIN12525.1	1902	3.7e-210	C-3 sterol dehydrogenase/3-beta-hydroxysteroid dehydrogenase [Handroanthus impetiginosus]	XM_012991768.1	XM_012991768	780	0	PREDICTED: Erythranthe guttatus 3beta-hydroxysteroid-dehydrogenase/decarboxylase isoform 2 (LOC105967180), mRNA	K07748	E1.1.1.170, NSDHL, ERG26	sterol-4alpha-carboxylate 3-dehydrogenase (decarboxylating)	http://www.genome.jp/dbget-bin/www_bget?ko:K07748	Q67ZE1	1673	5e-185	3beta-hydroxysteroid-dehydrogenase/decarboxylase isoform 2 OS=Arabidopsis thaliana OX=3702 GN=3BETAHSD/D2 PE=2 SV=2	PF07822//PF01073//PF01370	Neurotoxin B-IV-like protein//3-beta hydroxysteroid dehydrogenase/isomerase family//NAD dependent epimerase/dehydratase family	GO:0008210//GO:0006694//GO:0009405//GO:0008209//GO:0006810//GO:0008207//GO:0055114	estrogen metabolic process//steroid biosynthetic process//pathogenesis//androgen metabolic process//transport//C21-steroid hormone metabolic process//oxidation-reduction process	GO:0019871//GO:0050662//GO:0003854//GO:0003824//GO:0016616	sodium channel inhibitor activity//obsolete coenzyme binding//3-beta-hydroxy-delta5-steroid dehydrogenase activity//catalytic activity//oxidoreductase activity, acting on the CH-OH group of donors, NAD or NADP as acceptor	GO:0005576	extracellular region	KOG1430	C-3 sterol dehydrogenase/3-beta-hydroxysteroid dehydrogenase and related dehydrogenases	FALSE	-1.27797	0.019379	FALSE	0.915944	0.118153	FALSE	-0.472742	0.448512	DOWN	-1.54046	0.00318712	FALSE	-0.674472	0.251712
Cluster-11149.15493	8.57	9.8	7.01	10.86	8.77	2281	747093163	XP_011094377.1	1508	2.3e-164	NADPH-dependent diflavin oxidoreductase 1 isoform X1 [Sesamum indicum]	XM_020697928.1	XM_020697928	613	0	PREDICTED: Sesamum indicum NADPH-dependent diflavin oxidoreductase 1 (LOC105174089), transcript variant X4, mRNA	-	-	-	http://www.genome.jp/dbget-bin/www_bget?ko:-	Q6NPS8	1240	1e-134	NADPH-dependent diflavin oxidoreductase 1 OS=Arabidopsis thaliana OX=3702 GN=ATR3 PE=1 SV=1	PF00667//PF00175	FAD binding domain//oxidoreductase NAD-binding domain	GO:0055114	oxidation-reduction process	GO:0016491	oxidoreductase activity	--	--	KOG1159	NADP-dependent flavoprotein reductase	FALSE	0.0534401	1	FALSE	-0.0874448	1	FALSE	-0.144757	0.919705	FALSE	0.334225	0.791916	FALSE	0.196776	0.854983
Cluster-11149.19393	17.1	29.85	26.67	53.7	34.29	1304	747106915	XP_011101755.1	1020	5e-108	UDP-glucuronic acid decarboxylase 6 [Sesamum indicum]	XM_011103453.2	XM_011103453	463	0	PREDICTED: Sesamum indicum UDP-glucuronic acid decarboxylase 6 (LOC105179814), transcript variant X4, mRNA	K08678	UXS1, uxs	UDP-glucuronate decarboxylase	http://www.genome.jp/dbget-bin/www_bget?ko:K08678	Q9ZV36	944	1.2e-100	UDP-glucuronic acid decarboxylase 6 OS=Arabidopsis thaliana OX=3702 GN=UXS6 PE=2 SV=1	PF01370//PF01073//PF03435//PF02254	NAD dependent epimerase/dehydratase family//3-beta hydroxysteroid dehydrogenase/isomerase family//Saccharopine dehydrogenase NADP binding domain//TrkA-N domain	GO:0008209//GO:0006694//GO:0008210//GO:0006813//GO:0008207//GO:0055114	androgen metabolic process//steroid biosynthetic process//estrogen metabolic process//potassium ion transport//C21-steroid hormone metabolic process//oxidation-reduction process	GO:0050662//GO:0003824//GO:0016616//GO:0003854//GO:0016491	obsolete coenzyme binding//catalytic activity//oxidoreductase activity, acting on the CH-OH group of donors, NAD or NADP as acceptor//3-beta-hydroxy-delta5-steroid dehydrogenase activity//oxidoreductase activity	--	--	KOG1429	dTDP-glucose 4-6-dehydratase/UDP-glucuronic acid decarboxylase	FALSE	-0.642087	0.365147	FALSE	0.249918	0.836084	FALSE	-0.502925	0.411388	FALSE	-0.978518	0.0918361	FALSE	-0.778576	0.156589
Cluster-11149.26063	34.81	40.63	42.12	104.29	54.6	1564	604303983	EYU23333.1	1635	2.9e-179	hypothetical protein MIMGU_mgv1a007907mg [Erythranthe guttata]	XM_011076132.2	XM_011076132	705	0	PREDICTED: Sesamum indicum UDP-glucose 4-epimerase GEPI48 (LOC105159167), mRNA	K01784	galE, GALE	UDP-glucose 4-epimerase	http://www.genome.jp/dbget-bin/www_bget?ko:K01784	O65781	1548	1.4e-170	UDP-glucose 4-epimerase GEPI48 OS=Cyamopsis tetragonoloba OX=3832 PE=2 SV=1	PF01073//PF01370//PF03435//PF08241	3-beta hydroxysteroid dehydrogenase/isomerase family//NAD dependent epimerase/dehydratase family//Saccharopine dehydrogenase NADP binding domain//Methyltransferase domain	GO:0008209//GO:0008210//GO:0006694//GO:0008207//GO:0055114	androgen metabolic process//estrogen metabolic process//steroid biosynthetic process//C21-steroid hormone metabolic process//oxidation-reduction process	GO:0008168//GO:0050662//GO:0016616//GO:0003824//GO:0016491//GO:0003854	methyltransferase activity//obsolete coenzyme binding//oxidoreductase activity, acting on the CH-OH group of donors, NAD or NADP as acceptor//catalytic activity//oxidoreductase activity//3-beta-hydroxy-delta5-steroid dehydrogenase activity	--	--	KOG1371	UDP-glucose 4-epimerase/UDP-sulfoquinovose synthase	FALSE	-1.1565	0.034565	FALSE	0.536732	0.45183	FALSE	-0.730537	0.174067	FALSE	-0.909623	0.115726	FALSE	-0.422892	0.511081
Cluster-11149.36461	0.67	0.34	1.2	2.59	1.56	1017	1173793763	XP_020549668.1	1013	2.5e-107	uncharacterized protein LOC105161921 isoform X2 [Sesamum indicum]	XM_020694010.1	XM_020694010	193	6.02e-94	PREDICTED: Sesamum indicum uncharacterized LOC105161921 (LOC105161921), transcript variant X3, mRNA	-	-	-	http://www.genome.jp/dbget-bin/www_bget?ko:-	--	--	--	--	PF13606//PF08414//PF04261	Ankyrin repeat//Respiratory burst NADPH oxidase//Dyp-type peroxidase family	GO:0006804//GO:0055114//GO:0006979	obsolete peroxidase reaction//oxidation-reduction process//response to oxidative stress	GO:0004601//GO:0005515//GO:0050664//GO:0020037	peroxidase activity//protein binding//oxidoreductase activity, acting on NAD(P)H, oxygen as acceptor//heme binding	--	--	--	--	DOWN	-2.67916	0.00152948	FALSE	0.330182	0.839086	DOWN	-2.45486	0.00383658	FALSE	-1.27987	0.156374	FALSE	-0.998388	0.289692
Cluster-11149.33323	8.06	10.36	6.63	11.98	8.63	2765	747084459	XP_011089641.1	905	2.3e-94	adenylyltransferase and sulfurtransferase MOCS3 [Sesamum indicum]	XM_011091339.2	XM_011091339	390	0	PREDICTED: Sesamum indicum adenylyltransferase and sulfurtransferase MOCS3 (LOC105170538), mRNA	K11996	MOCS3, UBA4	adenylyltransferase and sulfurtransferase [EC:2.7.7.80 2.8.1.11]	http://www.genome.jp/dbget-bin/www_bget?ko:K11996	Q9ZNW0	683	4.8e-70	Adenylyltransferase and sulfurtransferase MOCS3 OS=Arabidopsis thaliana OX=3702 GN=MOCS3 PE=2 SV=1	PF03435//PF03721//PF07992//PF00899	Saccharopine dehydrogenase NADP binding domain//UDP-glucose/GDP-mannose dehydrogenase family, NAD binding domain//Pyridine nucleotide-disulphide oxidoreductase//ThiF family	GO:0055114	oxidation-reduction process	GO:0016616//GO:0008641//GO:0016491//GO:0051287	oxidoreductase activity, acting on the CH-OH group of donors, NAD or NADP as acceptor//ubiquitin-like modifier activating enzyme activity//oxidoreductase activity//NAD binding	--	--	KOG2017	Molybdopterin synthase sulfurylase	FALSE	-0.00848319	1	FALSE	0.0769958	1	FALSE	-0.0422477	1	FALSE	0.104355	1	FALSE	0.131346	0.952519
Cluster-11149.27268	8.81	10.03	9.68	12.33	12.67	1009	1091794601	XP_018674234.1	1074	2.1e-114	PREDICTED: isocitrate dehydrogenase [NAD] regulatory subunit 1, mitochondrial isoform X2 [Musa acuminata subsp. malaccensis]	XM_011090392.2	XM_011090392	281	7.2e-143	PREDICTED: Sesamum indicum isocitrate dehydrogenase [NAD] regulatory subunit 1, mitochondrial-like (LOC105169847), mRNA	-	-	-	http://www.genome.jp/dbget-bin/www_bget?ko:-	Q8LFC0	733	2.8e-76	Isocitrate dehydrogenase [NAD] regulatory subunit 1, mitochondrial OS=Arabidopsis thaliana OX=3702 GN=IDH1 PE=1 SV=2	PF00180	Isocitrate/isopropylmalate dehydrogenase	GO:0055114	oxidation-reduction process	GO:0016616	oxidoreductase activity, acting on the CH-OH group of donors, NAD or NADP as acceptor	--	--	KOG0785	Isocitrate dehydrogenase, alpha subunit	FALSE	-0.0893075	1	FALSE	-0.437401	0.622538	FALSE	-0.637387	0.283921	FALSE	0.185882	0.975926	FALSE	-0.30145	0.718417
Cluster-11149.48666	0.24	0.16	0.73	0.63	0.96	790	1173798808	XP_011083203.2	1030	2.1e-109	LOW QUALITY PROTEIN: dihydroflavonol 4-reductase [Sesamum indicum]	XM_011084901.2	XM_011084901	453	0	PREDICTED: Sesamum indicum dihydroflavonol 4-reductase (LOC105165774), mRNA	K13082	DFR	bifunctional dihydroflavonol 4-reductase/flavanone 4-reductase [EC:1.1.1.219 1.1.1.234]	http://www.genome.jp/dbget-bin/www_bget?ko:K13082	P14721	920	4.6e-98	Dihydroflavonol 4-reductase OS=Antirrhinum majus OX=4151 GN=DFRA PE=2 SV=1	PF01073//PF07535//PF01370	3-beta hydroxysteroid dehydrogenase/isomerase family//DBF zinc finger//NAD dependent epimerase/dehydratase family	GO:0008207//GO:0055114//GO:0008209//GO:0008210//GO:0006694	C21-steroid hormone metabolic process//oxidation-reduction process//androgen metabolic process//estrogen metabolic process//steroid biosynthetic process	GO:0016616//GO:0003824//GO:0003854//GO:0003676//GO:0050662//GO:0008270	oxidoreductase activity, acting on the CH-OH group of donors, NAD or NADP as acceptor//catalytic activity//3-beta-hydroxy-delta5-steroid dehydrogenase activity//nucleic acid binding//obsolete coenzyme binding//zinc ion binding	--	--	--	--	FALSE	-1.68078	0.521897	FALSE	-0.996779	0.550347	FALSE	-2.77464	0.051137	FALSE	-0.717751	1	FALSE	-1.75657	0.202157
Cluster-11149.33128	15.23	18.62	13.78	27.3	18.19	1882	1173823413	XP_011090128.2	1638	1.6e-179	protein TRAUCO isoform X1 [Sesamum indicum]	XM_011091826.2	XM_011091826	614	0	PREDICTED: Sesamum indicum protein TRAUCO (LOC105170902), transcript variant X1, mRNA	K14964	ASH2	Set1/Ash2 histone methyltransferase complex subunit ASH2	http://www.genome.jp/dbget-bin/www_bget?ko:K14964	Q9C8J7	1113	4.5e-120	Protein TRAUCO OS=Arabidopsis thaliana OX=3702 GN=TRO PE=1 SV=1	PF00622//PF01210	SPRY domain//NAD-dependent glycerol-3-phosphate dehydrogenase N-terminus	GO:0046168//GO:0055114	glycerol-3-phosphate catabolic process//oxidation-reduction process	GO:0051287//GO:0005515//GO:0016616	NAD binding//protein binding//oxidoreductase activity, acting on the CH-OH group of donors, NAD or NADP as acceptor	--	--	KOG2626	Histone H3 (Lys4) methyltransferase complex, subunit CPS60/ASH2/BRE2	FALSE	-0.34998	0.749853	FALSE	0.189266	0.921381	FALSE	-0.271473	0.714192	FALSE	-0.167866	0.995823	FALSE	-0.0286024	1
Cluster-11149.28716	36.99	54.99	44.02	57.79	59.12	1813	848870863	XP_012836018.1	1794	1.2e-197	PREDICTED: 3-isopropylmalate dehydrogenase, chloroplastic-like [Erythranthe guttata]	XM_011079035.2	XM_011079035	602	0	PREDICTED: Sesamum indicum 3-isopropylmalate dehydrogenase, chloroplastic (LOC105161377), mRNA	K00030	IDH3	isocitrate dehydrogenase (NAD+)	http://www.genome.jp/dbget-bin/www_bget?ko:K00030	Q945K7	1568	7.6e-173	Isocitrate dehydrogenase [NAD] catalytic subunit 5, mitochondrial OS=Arabidopsis thaliana OX=3702 GN=IDH5 PE=1 SV=1	PF00180	Isocitrate/isopropylmalate dehydrogenase	GO:0055114	oxidation-reduction process	GO:0016616	oxidoreductase activity, acting on the CH-OH group of donors, NAD or NADP as acceptor	--	--	KOG0785	Isocitrate dehydrogenase, alpha subunit	FALSE	0.130784	1	FALSE	-0.429199	0.594	FALSE	-0.40919	0.518	FALSE	0.0302652	1	FALSE	-0.448932	0.468
Cluster-11149.31248	5.51	8.9	7.07	11.53	9.65	1397	747079844	XP_011087148.1	557	2.6e-54	NADPH:adrenodoxin oxidoreductase, mitochondrial isoform X1 [Sesamum indicum]	XM_012973854.1	XM_012973854	107	5.35e-46	PREDICTED: Erythranthe guttatus NADPH:adrenodoxin oxidoreductase, mitochondrial (LOC105950489), mRNA	K18914	FDXR	adrenodoxin-NADP+ reductase	http://www.genome.jp/dbget-bin/www_bget?ko:K18914	Q8W3L1	350	1e-31	NADPH:adrenodoxin oxidoreductase, mitochondrial OS=Arabidopsis thaliana OX=3702 GN=MFDR PE=1 SV=1	--	--	--	--	--	--	--	--	KOG1800	Ferredoxin/adrenodoxin reductase	FALSE	-0.16805	1	FALSE	-0.14081	0.999798	FALSE	-0.419569	0.534956	FALSE	-0.391344	0.728827	FALSE	-0.582072	0.353513
Cluster-11149.39523	5.29	5.06	3.86	9.85	5.28	5014	747078393	XP_011086356.1	4537	0	TELO2-interacting protein 1 homolog isoform X4 [Sesamum indicum]	XM_011088050.2	XM_011088050	2290	0	PREDICTED: Sesamum indicum TELO2-interacting protein 1 homolog (LOC105168110), transcript variant X1, mRNA	K20403	TTI1	TELO2-interacting protein 1	http://www.genome.jp/dbget-bin/www_bget?ko:K20403	Q91V83	150	5.6e-08	TELO2-interacting protein 1 homolog OS=Mus musculus OX=10090 GN=Tti1 PE=1 SV=2	PF00141//PF03447//PF09340	Peroxidase//Homoserine dehydrogenase, NAD binding domain//Histone acetyltransferase subunit NuA4	GO:0006804//GO:0055114//GO:0016573//GO:0006979	obsolete peroxidase reaction//oxidation-reduction process//histone acetylation//response to oxidative stress	GO:0016491//GO:0020037//GO:0004601//GO:0050661	oxidoreductase activity//heme binding//peroxidase activity//NADP binding	GO:0000123	histone acetyltransferase complex	--	--	FALSE	-0.763398	0.241364	FALSE	0.503346	0.507025	FALSE	-0.3708	0.588496	FALSE	-0.219509	0.908285	FALSE	0.233823	0.795281
Cluster-11149.18915	8.06	22.3	10.75	29.92	14.72	2248	604333284	EYU37635.1	1466	1.7e-159	hypothetical protein MIMGU_mgv1a003216mg [Erythranthe guttata]	XR_002287684.1	XR_002287684	676	0	PREDICTED: Sesamum indicum D-3-phosphoglycerate dehydrogenase 1, chloroplastic-like (LOC105169509), misc_RNA	-	-	-	http://www.genome.jp/dbget-bin/www_bget?ko:-	O49485	1210	3.1e-131	D-3-phosphoglycerate dehydrogenase 1, chloroplastic OS=Arabidopsis thaliana OX=3702 GN=PGDH1 PE=1 SV=1	PF03446//PF03720//PF00389//PF02826	NAD binding domain of 6-phosphogluconate dehydrogenase//UDP-glucose/GDP-mannose dehydrogenase family, UDP binding domain//D-isomer specific 2-hydroxyacid dehydrogenase, catalytic domain//D-isomer specific 2-hydroxyacid dehydrogenase, NAD binding domain	GO:0055114	oxidation-reduction process	GO:0016616//GO:0051287//GO:0050661	oxidoreductase activity, acting on the CH-OH group of donors, NAD or NADP as acceptor//NAD binding//NADP binding	--	--	KOG0068	D-3-phosphoglycerate dehydrogenase, D-isomer-specific 2-hydroxy acid dehydrogenase superfamily	FALSE	-0.222715	0.92414	FALSE	0.627062	0.357601	FALSE	0.293575	0.70223	FALSE	-1.2165	0.0242139	FALSE	-0.63942	0.275609
Cluster-11149.24230	91.56	230.55	163.4	305.96	225.74	2018	747079095	XP_011086733.1	1024	2.7e-108	glyceraldehyde-3-phosphate dehydrogenase, cytosolic [Sesamum indicum]	XM_011088431.2	XM_011088431	568	0	PREDICTED: Sesamum indicum glyceraldehyde-3-phosphate dehydrogenase, cytosolic (LOC105168372), mRNA	K00134	GAPDH, gapA	glyceraldehyde 3-phosphate dehydrogenase	http://www.genome.jp/dbget-bin/www_bget?ko:K00134	P26520	961	2e-102	Glyceraldehyde-3-phosphate dehydrogenase, cytosolic OS=Petunia hybrida OX=4102 GN=GAPC PE=2 SV=1	PF01113//PF02826//PF02800//PF00044	Dihydrodipicolinate reductase, N-terminus//D-isomer specific 2-hydroxyacid dehydrogenase, NAD binding domain//Glyceraldehyde 3-phosphate dehydrogenase, C-terminal domain//Glyceraldehyde 3-phosphate dehydrogenase, NAD binding domain	GO:0055114//GO:0009089//GO:0009085	oxidation-reduction process//lysine biosynthetic process via diaminopimelate//lysine biosynthetic process	GO:0008839//GO:0016620//GO:0051287	4-hydroxy-tetrahydrodipicolinate reductase//oxidoreductase activity, acting on the aldehyde or oxo group of donors, NAD or NADP as acceptor//NAD binding	--	--	KOG0657	Glyceraldehyde 3-phosphate dehydrogenase	FALSE	-0.206382	0.950546	FALSE	0.0423049	1	FALSE	-0.274859	0.705108	FALSE	-1.066	0.0520447	FALSE	-1.0737	0.0323151
Cluster-11149.4944	4.13	8.32	3.75	7.9	5.24	1155	747080961	XP_011087747.1	1264	2.3e-136	probable 3-hydroxyisobutyrate dehydrogenase-like 3, mitochondrial [Sesamum indicum]	XM_011089445.2	XM_011089445	530	0	PREDICTED: Sesamum indicum probable 3-hydroxyisobutyrate dehydrogenase-like 3, mitochondrial (LOC105169141), mRNA	-	-	-	http://www.genome.jp/dbget-bin/www_bget?ko:-	Q949M8	850	8.7e-90	Probable 3-hydroxyisobutyrate dehydrogenase-like 3, mitochondrial OS=Arabidopsis thaliana OX=3702 GN=At1g71180 PE=2 SV=1	PF02826//PF02153//PF03446//PF02737//PF14833	D-isomer specific 2-hydroxyacid dehydrogenase, NAD binding domain//Prephenate dehydrogenase//NAD binding domain of 6-phosphogluconate dehydrogenase//3-hydroxyacyl-CoA dehydrogenase, NAD binding domain//NAD-binding of NADP-dependent 3-hydroxyisobutyrate dehydrogenase	GO:0006571//GO:0055114//GO:0006554//GO:0000162//GO:0006568//GO:0006552//GO:0006550//GO:0006633//GO:0009094//GO:0006574//GO:0018874//GO:0006631	tyrosine biosynthetic process//oxidation-reduction process//lysine catabolic process//tryptophan biosynthetic process//tryptophan metabolic process//leucine catabolic process//isoleucine catabolic process//fatty acid biosynthetic process//L-phenylalanine biosynthetic process//valine catabolic process//benzoate metabolic process//fatty acid metabolic process	GO:0051287//GO:0008977//GO:0004665//GO:0016491//GO:0050661//GO:0003857	NAD binding//prephenate dehydrogenase (NAD+) activity//prephenate dehydrogenase (NADP+) activity//oxidoreductase activity//NADP binding//3-hydroxyacyl-CoA dehydrogenase activity	--	--	KOG0409	Predicted dehydrogenase	FALSE	0.280677	0.867039	FALSE	0.194695	0.955046	FALSE	0.364639	0.636597	FALSE	-0.261901	0.889388	FALSE	-0.117152	1
Cluster-11149.23464	136.55	88.47	125.86	233.95	177.07	709	1024041780	KZV45627.1	1174	3.8e-126	UDP-glucose 6-dehydrogenase family protein [Dorcoceras hygrometricum]	XM_011087430.2	XM_011087430	512	0	PREDICTED: Sesamum indicum UDP-glucose 6-dehydrogenase 4 (LOC105167638), mRNA	K00012	UGDH, ugd	UDPglucose 6-dehydrogenase	http://www.genome.jp/dbget-bin/www_bget?ko:K00012	Q9LIA8	1124	9e-122	UDP-glucose 6-dehydrogenase 2 OS=Arabidopsis thaliana OX=3702 GN=UGD2 PE=1 SV=1	PF00984//PF03721	UDP-glucose/GDP-mannose dehydrogenase family, central domain//UDP-glucose/GDP-mannose dehydrogenase family, NAD binding domain	GO:0055114	oxidation-reduction process	GO:0051287//GO:0016616	NAD binding//oxidoreductase activity, acting on the CH-OH group of donors, NAD or NADP as acceptor	--	--	KOG2666	UDP-glucose/GDP-mannose dehydrogenase	FALSE	-1.18817	0.02881	FALSE	0.00279248	1	FALSE	-1.29614	0.00823767	FALSE	-0.111486	1	FALSE	-0.158697	0.902688
Cluster-11149.25377	21.5	39.09	46.81	48.68	66.97	3207	1276236366	PIM99361.1	2527	2.2e-282	putative NAD+-dependent epimerase [Handroanthus impetiginosus]	XM_011084504.2	XM_011084504	1059	0	PREDICTED: Sesamum indicum trifunctional UDP-glucose 4,6-dehydratase/UDP-4-keto-6-deoxy-D-glucose 3,5-epimerase/UDP-4-keto-L-rhamnose-reductase RHM1 (LOC105165479), mRNA	K12450	RHM	UDP-glucose 4,6-dehydratase	http://www.genome.jp/dbget-bin/www_bget?ko:K12450	Q9SYM5	2378	1.6e-266	Trifunctional UDP-glucose 4,6-dehydratase/UDP-4-keto-6-deoxy-D-glucose 3,5-epimerase/UDP-4-keto-L-rhamnose-reductase RHM1 OS=Arabidopsis thaliana OX=3702 GN=RHM1 PE=1 SV=1	PF01370//PF01073	NAD dependent epimerase/dehydratase family//3-beta hydroxysteroid dehydrogenase/isomerase family	GO:0055114//GO:0008207//GO:0008209//GO:0008210//GO:0006694	oxidation-reduction process//C21-steroid hormone metabolic process//androgen metabolic process//estrogen metabolic process//steroid biosynthetic process	GO:0016616//GO:0003824//GO:0003854//GO:0050662	oxidoreductase activity, acting on the CH-OH group of donors, NAD or NADP as acceptor//catalytic activity//3-beta-hydroxy-delta5-steroid dehydrogenase activity//obsolete coenzyme binding	--	--	KOG0747	Putative NAD+-dependent epimerases	FALSE	-0.116	1	FALSE	-0.856266	0.143521	FALSE	-1.08329	0.0292425	FALSE	-0.502577	0.517176	DOWN	-1.40884	0.00382402
Cluster-11149.22843	251.46	67.87	183.76	328.77	264.84	2311	747047693	XP_011069826.1	2037	1e-225	UDP-glucuronate 4-epimerase 1 [Sesamum indicum]	XM_011071524.2	XM_011071524	777	0	PREDICTED: Sesamum indicum UDP-glucuronate 4-epimerase 1 (LOC105155627), mRNA	K08679	E5.1.3.6	UDP-glucuronate 4-epimerase	http://www.genome.jp/dbget-bin/www_bget?ko:K08679	Q9M0B6	1768	6.2e-196	UDP-glucuronate 4-epimerase 1 OS=Arabidopsis thaliana OX=3702 GN=GAE1 PE=1 SV=1	PF01073//PF01370	3-beta hydroxysteroid dehydrogenase/isomerase family//NAD dependent epimerase/dehydratase family	GO:0008209//GO:0008210//GO:0006694//GO:0055114//GO:0008207	androgen metabolic process//estrogen metabolic process//steroid biosynthetic process//oxidation-reduction process//C21-steroid hormone metabolic process	GO:0050662//GO:0016616//GO:0003824//GO:0003854	obsolete coenzyme binding//oxidoreductase activity, acting on the CH-OH group of donors, NAD or NADP as acceptor//catalytic activity//3-beta-hydroxy-delta5-steroid dehydrogenase activity	--	--	KOG1371	UDP-glucose 4-epimerase/UDP-sulfoquinovose synthase	DOWN	-2.0748	1.88e-05	FALSE	-0.0842859	1	DOWN	-2.26987	1.18e-06	FALSE	0.288347	0.806498	FALSE	0.154053	0.905762
Cluster-11149.19210	9.98	13.04	10.17	11.72	14.66	3992	1600636572	TEY21818.1	759	2.8e-77	isocitrate dehydrogenase (NAD+) [Salvia splendens]	XM_012978331.1	XM_012978331	332	1.3e-170	PREDICTED: Erythranthe guttatus isocitrate dehydrogenase [NAD] regulatory subunit 1, mitochondrial (LOC105954660), mRNA	-	-	-	http://www.genome.jp/dbget-bin/www_bget?ko:-	Q8LFC0	686	3.1e-70	Isocitrate dehydrogenase [NAD] regulatory subunit 1, mitochondrial OS=Arabidopsis thaliana OX=3702 GN=IDH1 PE=1 SV=2	PF00180//PF01674	Isocitrate/isopropylmalate dehydrogenase//Lipase (class 2)	GO:0055114	oxidation-reduction process	GO:0016787//GO:0016616	hydrolase activity//oxidoreductase activity, acting on the CH-OH group of donors, NAD or NADP as acceptor	--	--	KOG0785	Isocitrate dehydrogenase, alpha subunit	FALSE	0.353769	0.744832	FALSE	-0.719206	0.257246	FALSE	-0.476208	0.441562	FALSE	0.444855	0.5929	FALSE	-0.324343	0.666189
Cluster-11149.19440	6.7	11.12	7.84	12.05	11.37	4410	848873032	XP_012837074.1	1013	1.1e-106	PREDICTED: SUMO-activating enzyme subunit 2 [Erythranthe guttata]	XM_012981620.1	XM_012981620	464	0	PREDICTED: Erythranthe guttatus SUMO-activating enzyme subunit 2 (LOC105957672), mRNA	K10685	UBLE1B, SAE2, UBA2	ubiquitin-like 1-activating enzyme E1 B	http://www.genome.jp/dbget-bin/www_bget?ko:K10685	Q9SJT1	892	4.5e-94	SUMO-activating enzyme subunit 2 OS=Arabidopsis thaliana OX=3702 GN=SAE2 PE=1 SV=1	PF03435//PF03983//PF08825//PF03721//PF08001//PF00899	Saccharopine dehydrogenase NADP binding domain//SLA1 homology domain 1, SHD1//E2 binding domain//UDP-glucose/GDP-mannose dehydrogenase family, NAD binding domain//CMV US//ThiF family	GO:0045116//GO:0030683//GO:0055114	protein neddylation//mitigation of host immune response by virus//oxidation-reduction process	GO:0051287//GO:0016491//GO:0043130//GO:0008092//GO:0016616//GO:0019781//GO:0008641//GO:0042802//GO:0030674	NAD binding//oxidoreductase activity//ubiquitin binding//cytoskeletal protein binding//oxidoreductase activity, acting on the CH-OH group of donors, NAD or NADP as acceptor//NEDD8 activating enzyme activity//ubiquitin-like modifier activating enzyme activity//identical protein binding//protein-macromolecule adaptor activity	GO:0044386	integral to host endoplasmic reticulum membrane	KOG2013	SMT3/SUMO-activating complex, catalytic component UBA2	FALSE	0.0841219	1	FALSE	-0.311836	0.770448	FALSE	-0.338484	0.625786	FALSE	-0.168907	0.996869	FALSE	-0.530731	0.384742
Cluster-11149.33342	8.17	10.85	8.55	18.22	12.41	2644	747102255	XP_011099286.1	2601	4.8e-291	probable translation initiation factor eIF-2B subunit delta isoform X1 [Sesamum indicum]	XM_011100984.2	XM_011100984	1036	0	PREDICTED: Sesamum indicum probable translation initiation factor eIF-2B subunit delta (LOC105177741), transcript variant X1, mRNA	K03680	EIF2B4	translation initiation factor eIF-2B subunit delta	http://www.genome.jp/dbget-bin/www_bget?ko:K03680	Q54FM3	899	4.2e-95	Translation initiation factor eIF-2B subunit delta OS=Dictyostelium discoideum OX=44689 GN=eif2b4 PE=3 SV=1	PF01001//PF02866//PF02949//PF01008//PF09462	Hepatitis C virus non-structural protein NS4b//lactate/malate dehydrogenase, alpha/beta C-terminal domain//7tm Odorant receptor//Initiation factor 2 subunit family//Mus7/MMS22 family	GO:0055114//GO:0006508//GO:0044237//GO:0007608//GO:0006144//GO:0006974//GO:0031297//GO:0006281//GO:0007187	oxidation-reduction process//proteolysis//cellular metabolic process//sensory perception of smell//purine nucleobase metabolic process//cellular response to DNA damage stimulus//replication fork processing//DNA repair//G protein-coupled receptor signaling pathway, coupled to cyclic nucleotide second messenger	GO:0004252//GO:0005549//GO:0004984//GO:0003968//GO:0016616//GO:0004197//GO:0017111	serine-type endopeptidase activity//odorant binding//olfactory receptor activity//RNA-directed 5'-3' RNA polymerase activity//oxidoreductase activity, acting on the CH-OH group of donors, NAD or NADP as acceptor//cysteine-type endopeptidase activity//nucleoside-triphosphatase activity	GO:0016020//GO:0005634//GO:0031379	membrane//nucleus//RNA-directed RNA polymerase complex	KOG1467	Translation initiation factor 2B, delta subunit (eIF-2Bdelta/GCD2)	FALSE	-0.546777	0.476811	FALSE	0.158132	0.971192	FALSE	-0.499395	0.421266	FALSE	-0.481606	0.555689	FALSE	-0.373462	0.597917
Cluster-11488.0	2.45	0.7	0.42	0.2	0.62	878	747092959	XP_011094266.1	1147	6.3e-123	secoisolariciresinol dehydrogenase-like [Sesamum indicum]	XM_011095964.2	XM_011095964	311	1.31e-159	PREDICTED: Sesamum indicum secoisolariciresinol dehydrogenase-like (LOC105174014), mRNA	-	-	-	http://www.genome.jp/dbget-bin/www_bget?ko:-	Q94KL8	778	1.5e-81	Secoisolariciresinol dehydrogenase (Fragment) OS=Podophyllum peltatum OX=35933 PE=1 SV=1	PF02737//PF00107//PF01073	3-hydroxyacyl-CoA dehydrogenase, NAD binding domain//Zinc-binding dehydrogenase//3-beta hydroxysteroid dehydrogenase/isomerase family	GO:0006574//GO:0018874//GO:0006631//GO:0006694//GO:0008210//GO:0008207//GO:0055114//GO:0006554//GO:0006568//GO:0006552//GO:0008209//GO:0006550//GO:0006633	valine catabolic process//benzoate metabolic process//fatty acid metabolic process//steroid biosynthetic process//estrogen metabolic process//C21-steroid hormone metabolic process//oxidation-reduction process//lysine catabolic process//tryptophan metabolic process//leucine catabolic process//androgen metabolic process//isoleucine catabolic process//fatty acid biosynthetic process	GO:0016616//GO:0003854//GO:0016491//GO:0003857	oxidoreductase activity, acting on the CH-OH group of donors, NAD or NADP as acceptor//3-beta-hydroxy-delta5-steroid dehydrogenase activity//oxidoreductase activity//3-hydroxyacyl-CoA dehydrogenase activity	--	--	--	--	FALSE	1.95302	0.288411	FALSE	-1.95932	0.202516	FALSE	-0.117971	1	UP	4.19592	5.79e-06	UP	2.18798	0.00488602
Cluster-11149.25871	173.7	76.05	166.09	155.62	246.82	3612	1276236366	PIM99361.1	2569	3.4e-287	putative NAD+-dependent epimerase [Handroanthus impetiginosus]	XM_011075801.2	XM_011075801	1017	0	PREDICTED: Sesamum indicum protein GIGANTEA-like (LOC105158892), mRNA	K12450	RHM	UDP-glucose 4,6-dehydratase	http://www.genome.jp/dbget-bin/www_bget?ko:K12450	Q9SYM5	2419	3.2e-271	Trifunctional UDP-glucose 4,6-dehydratase/UDP-4-keto-6-deoxy-D-glucose 3,5-epimerase/UDP-4-keto-L-rhamnose-reductase RHM1 OS=Arabidopsis thaliana OX=3702 GN=RHM1 PE=1 SV=1	PF01370//PF01073	NAD dependent epimerase/dehydratase family//3-beta hydroxysteroid dehydrogenase/isomerase family	GO:0008207//GO:0055114//GO:0008209//GO:0006694//GO:0008210	C21-steroid hormone metabolic process//oxidation-reduction process//androgen metabolic process//steroid biosynthetic process//estrogen metabolic process	GO:0016616//GO:0003824//GO:0003854//GO:0050662	oxidoreductase activity, acting on the CH-OH group of donors, NAD or NADP as acceptor//catalytic activity//3-beta-hydroxy-delta5-steroid dehydrogenase activity//obsolete coenzyme binding	--	--	KOG0747	Putative NAD+-dependent epimerases	FALSE	-0.833216	0.167737	FALSE	-1.06125	0.0507006	DOWN	-2.00525	1.83e-05	FALSE	0.834734	0.155792	FALSE	-0.276523	0.718417
Cluster-11149.20917	7.69	17	15.26	35.5	22.85	3642	1276244129	PIN04576.1	1912	5.2e-211	dTDP-glucose 4-6-dehydratase/UDP-glucuronic acid decarboxylase [Handroanthus impetiginosus]	XM_011084169.2	XM_011084169	475	0	PREDICTED: Sesamum indicum UDP-glucuronic acid decarboxylase 2 (LOC105165224), mRNA	K08678	UXS1, uxs	UDP-glucuronate decarboxylase	http://www.genome.jp/dbget-bin/www_bget?ko:K08678	Q9LZI2	1690	1.1e-186	UDP-glucuronic acid decarboxylase 2 OS=Arabidopsis thaliana OX=3702 GN=UXS2 PE=1 SV=1	PF01073//PF01370	3-beta hydroxysteroid dehydrogenase/isomerase family//NAD dependent epimerase/dehydratase family	GO:0008207//GO:0055114//GO:0006694//GO:0008210//GO:0008209	C21-steroid hormone metabolic process//oxidation-reduction process//steroid biosynthetic process//estrogen metabolic process//androgen metabolic process	GO:0003854//GO:0016616//GO:0003824//GO:0050662	3-beta-hydroxy-delta5-steroid dehydrogenase activity//oxidoreductase activity, acting on the CH-OH group of donors, NAD or NADP as acceptor//catalytic activity//obsolete coenzyme binding	--	--	KOG1429	dTDP-glucose 4-6-dehydratase/UDP-glucuronic acid decarboxylase	FALSE	-0.862287	0.156819	FALSE	0.23959	0.850616	FALSE	-0.733464	0.171197	DOWN	-1.53032	0.0026128	FALSE	-1.34071	0.00658507
Cluster-11149.21488	6.35	9.56	11.18	10.95	16.75	2591	1600664099	TEY46490.1	1534	2.5e-167	arogenate dehydrogenase (NADP+), plant [Salvia splendens]	XM_011080236.2	XM_011080236	692	0	PREDICTED: Sesamum indicum arogenate dehydrogenase 2, chloroplastic-like (LOC105162242), mRNA	K15227	TYRAAT	arogenate dehydrogenase (NADP+), plant	http://www.genome.jp/dbget-bin/www_bget?ko:K15227	Q9LMR3	1097	4.5e-118	Arogenate dehydrogenase 2, chloroplastic OS=Arabidopsis thaliana OX=3702 GN=TYRAAT2 PE=1 SV=1	PF02153//PF02737//PF03446//PF00208//PF01408//PF01210//PF02826	Prephenate dehydrogenase//3-hydroxyacyl-CoA dehydrogenase, NAD binding domain//NAD binding domain of 6-phosphogluconate dehydrogenase//Glutamate/Leucine/Phenylalanine/Valine dehydrogenase//oxidoreductase family, NAD-binding Rossmann fold//NAD-dependent glycerol-3-phosphate dehydrogenase N-terminus//D-isomer specific 2-hydroxyacid dehydrogenase, NAD binding domain	GO:0018874//GO:0006631//GO:0006574//GO:0009094//GO:0006552//GO:0006568//GO:0006550//GO:0006633//GO:0006520//GO:0006571//GO:0055114//GO:0046168//GO:0000162//GO:0006554	benzoate metabolic process//fatty acid metabolic process//valine catabolic process//L-phenylalanine biosynthetic process//leucine catabolic process//tryptophan metabolic process//isoleucine catabolic process//fatty acid biosynthetic process//cellular amino acid metabolic process//tyrosine biosynthetic process//oxidation-reduction process//glycerol-3-phosphate catabolic process//tryptophan biosynt…	GO:0003857//GO:0050661//GO:0016616//GO:0016491//GO:0008977//GO:0004665//GO:0051287	3-hydroxyacyl-CoA dehydrogenase activity//NADP binding//oxidoreductase activity, acting on the CH-OH group of donors, NAD or NADP as acceptor//oxidoreductase activity//prephenate dehydrogenase (NAD+) activity//prephenate dehydrogenase (NADP+) activity//NAD binding	--	--	--	--	FALSE	0.00466613	1	FALSE	-1.00944	0.0721436	FALSE	-1.11552	0.0266394	FALSE	-0.109182	1	FALSE	-1.16857	0.0221611
Cluster-11149.13205	0.4	0.54	0.38	1.97	0.58	2689	1293607926	PKA67201.1	543	2.1e-52	hypothetical protein AXF42_Ash004693 [Apostasia shenzhenica]	CP025669.1	CP025669	41	5.1e-09	Ipomoea triloba cultivar NCNSP0323 chromosome 10	-	-	-	http://www.genome.jp/dbget-bin/www_bget?ko:-	--	--	--	--	PF03721//PF07655//PF11435	UDP-glucose/GDP-mannose dehydrogenase family, NAD binding domain//Secretin N-terminal domain//RNA binding protein She2p	GO:0055114//GO:0009297	oxidation-reduction process//pilus assembly	GO:0051287//GO:0016616//GO:0003723	NAD binding//oxidoreductase activity, acting on the CH-OH group of donors, NAD or NADP as acceptor//RNA binding	GO:0019867	outer membrane	--	--	FALSE	-1.65836	0.00913815	FALSE	1.361	0.0377964	FALSE	-0.407409	0.705108	FALSE	-1.62597	0.0133715	FALSE	-0.314777	0.853128
Cluster-11149.34017	6.35	5.96	5.14	9.19	7.9	2030	1023975139	KZV18922.1	1117	4.4e-119	short chain alcohol dehydrogenase [Dorcoceras hygrometricum]	XM_012975250.1	XM_012975250	231	9.19e-115	PREDICTED: Erythranthe guttatus xanthoxin dehydrogenase-like (LOC105951798), mRNA	K09841	ABA2	xanthoxin dehydrogenase	http://www.genome.jp/dbget-bin/www_bget?ko:K09841	Q9C826	978	2.2e-104	Xanthoxin dehydrogenase OS=Arabidopsis thaliana OX=3702 GN=ABA2 PE=1 SV=1	PF01805//PF01073//PF01370	Surp module//3-beta hydroxysteroid dehydrogenase/isomerase family//NAD dependent epimerase/dehydratase family	GO:0008209//GO:0006694//GO:0008210//GO:0008207//GO:0055114//GO:0006396	androgen metabolic process//steroid biosynthetic process//estrogen metabolic process//C21-steroid hormone metabolic process//oxidation-reduction process//RNA processing	GO:0003723//GO:0050662//GO:0016616//GO:0003824//GO:0003854	RNA binding//obsolete coenzyme binding//oxidoreductase activity, acting on the CH-OH group of donors, NAD or NADP as acceptor//catalytic activity//3-beta-hydroxy-delta5-steroid dehydrogenase activity	--	--	--	--	FALSE	-0.422941	0.653137	FALSE	-0.17782	0.949007	FALSE	-0.711461	0.211762	FALSE	0.140015	1	FALSE	-0.087786	1
Cluster-11149.31249	5.93	6.01	4.7	9.86	7.26	1914	1276263473	PIN20020.1	383	5.4e-34	Ferredoxin/adrenodoxin reductase [Handroanthus impetiginosus]	XM_011088847.2	XM_011088847	309	3.78e-158	PREDICTED: Sesamum indicum NADPH:adrenodoxin oxidoreductase, mitochondrial (LOC105168712), transcript variant X2, mRNA	K18914	FDXR	adrenodoxin-NADP+ reductase	http://www.genome.jp/dbget-bin/www_bget?ko:K18914	Q8W3L1	322	2.4e-28	NADPH:adrenodoxin oxidoreductase, mitochondrial OS=Arabidopsis thaliana OX=3702 GN=MFDR PE=1 SV=1	--	--	--	--	--	--	--	--	KOG1800	Ferredoxin/adrenodoxin reductase	FALSE	-0.51238	0.557073	FALSE	0.0445351	1	FALSE	-0.578541	0.334194	FALSE	-0.0588936	1	FALSE	-0.0643431	1
Cluster-11149.21967	8.16	13.36	9.18	16.1	14.46	2329	1600683034	TEY65038.1	1733	1.9e-190	RNA-binding protein Musashi [Salvia splendens]	XM_011097641.2	XM_011097641	446	0	PREDICTED: Sesamum indicum heterogeneous nuclear ribonucleoprotein 1 (LOC105175256), mRNA	K14411	MSI	RNA-binding protein Musashi	http://www.genome.jp/dbget-bin/www_bget?ko:K14411	Q8W034	631	4.4e-64	Heterogeneous nuclear ribonucleoprotein 1 OS=Arabidopsis thaliana OX=3702 GN=RNP1 PE=1 SV=1	PF16367//PF03358//PF00076	RNA recognition motif//NADPH-dependent FMN reductase//RNA recognition motif. (a.k.a. RRM, RBD, or RNP domain)	--	--	GO:0003676//GO:0016491	nucleic acid binding//oxidoreductase activity	--	--	--	--	FALSE	-0.067641	1	FALSE	-0.240744	0.853627	FALSE	-0.419142	0.513591	FALSE	-0.306204	0.806498	FALSE	-0.596921	0.30921
Cluster-11925.0	1.65	3.54	2.64	5.85	4.18	1455	747094900	XP_011095308.1	1432	9.4e-156	putative anthocyanidin reductase isoform X2 [Sesamum indicum]	XM_011097006.2	XM_011097006	588	0	PREDICTED: Sesamum indicum putative anthocyanidin reductase (LOC105174808), transcript variant X2, mRNA	-	-	-	http://www.genome.jp/dbget-bin/www_bget?ko:-	Q5XLY0	653	7.7e-67	Putative anthocyanidin reductase OS=Ginkgo biloba OX=3311 PE=2 SV=1	PF01073//PF01370	3-beta hydroxysteroid dehydrogenase/isomerase family//NAD dependent epimerase/dehydratase family	GO:0008210//GO:0006694//GO:0008209//GO:0008207//GO:0055114	estrogen metabolic process//steroid biosynthetic process//androgen metabolic process//C21-steroid hormone metabolic process//oxidation-reduction process	GO:0050662//GO:0003854//GO:0003824//GO:0016616	obsolete coenzyme binding//3-beta-hydroxy-delta5-steroid dehydrogenase activity//catalytic activity//oxidoreductase activity, acting on the CH-OH group of donors, NAD or NADP as acceptor	--	--	--	--	FALSE	-0.519371	0.566119	FALSE	0.0886129	1	FALSE	-0.541338	0.436579	FALSE	-1.14821	0.0742277	FALSE	-1.10924	0.0689922
Cluster-11149.28289	167.94	245.38	277.16	574.79	447.61	879	1083891794	XP_009618541.2	567	1.1e-55	PREDICTED: cinnamoyl-CoA reductase 1-like [Nicotiana tomentosiformis]	XM_011082056.2	XM_011082056	182	6.74e-88	PREDICTED: Sesamum indicum cinnamoyl-CoA reductase 1 (LOC105163632), mRNA	-	-	-	http://www.genome.jp/dbget-bin/www_bget?ko:-	Q500U8	335	3.5e-30	Tetraketide alpha-pyrone reductase 1 OS=Arabidopsis thaliana OX=3702 GN=TKPR1 PE=1 SV=1	PF01370//PF00208//PF01073//PF07440	NAD dependent epimerase/dehydratase family//Glutamate/Leucine/Phenylalanine/Valine dehydrogenase//3-beta hydroxysteroid dehydrogenase/isomerase family//Caerin 1 protein	GO:0008210//GO:0006694//GO:0008209//GO:0008207//GO:0055114//GO:0006520	estrogen metabolic process//steroid biosynthetic process//androgen metabolic process//C21-steroid hormone metabolic process//oxidation-reduction process//cellular amino acid metabolic process	GO:0050662//GO:0003854//GO:0016491//GO:0016616//GO:0003824	obsolete coenzyme binding//3-beta-hydroxy-delta5-steroid dehydrogenase activity//oxidoreductase activity//oxidoreductase activity, acting on the CH-OH group of donors, NAD or NADP as acceptor//catalytic activity	GO:0005576	extracellular region	--	--	FALSE	-1.01835	0.072734	FALSE	-0.0375376	1	FALSE	-1.16666	0.0176627	FALSE	-1.10678	0.0411456	FALSE	-1.19432	0.0158953
Cluster-11149.15437	23.34	37.92	47.6	108.81	77.13	596	1046589281	ANW06222.1	678	1e-68	1-deoxy-D-xylulose 5-phosphate reductoisomerase [Rehmannia glutinosa]	KX058461.1	KX058461	397	0	Rehmannia glutinosa 1-deoxy-D-xylulose 5-phosphate reductoisomerase (DXR) mRNA, complete cds	K00099	dxr	1-deoxy-D-xylulose-5-phosphate reductoisomerase	http://www.genome.jp/dbget-bin/www_bget?ko:K00099	Q9XES0	551	2.1e-55	1-deoxy-D-xylulose 5-phosphate reductoisomerase, chloroplastic OS=Mentha piperita OX=34256 GN=DXR PE=2 SV=2	PF02670//PF01118	1-deoxy-D-xylulose 5-phosphate reductoisomerase//Semialdehyde dehydrogenase, NAD binding domain	GO:0055114	oxidation-reduction process	GO:0016620//GO:0051287//GO:0070402	oxidoreductase activity, acting on the aldehyde or oxo group of donors, NAD or NADP as acceptor//NAD binding//NADPH binding	--	--	--	--	FALSE	-1.29974	0.0167985	FALSE	0.0966629	1	FALSE	-1.31377	0.00899349	DOWN	-1.55843	0.00278604	DOWN	-1.51167	0.00256281
Cluster-11149.25825	3.88	6.51	3.36	5.31	5.45	6296	1552184271	RVW44519.1	1579	3.7e-172	Retrovirus-related Pol polyprotein from transposon TNT 1-94 [Vitis vinifera]	XM_020692400.1	XM_020692400	182	5e-87	PREDICTED: Sesamum indicum (-)-isopiperitenol/(-)-carveol dehydrogenase, mitochondrial-like (LOC105157143), mRNA	-	-	-	http://www.genome.jp/dbget-bin/www_bget?ko:-	Q9ZT94	1296	9.1e-141	Retrovirus-related Pol polyprotein from transposon RE2 OS=Arabidopsis thaliana OX=3702 GN=RE2 PE=4 SV=1	PF01667//PF03435//PF00665//PF01370//PF13683//PF01073	Ribosomal protein S27//Saccharopine dehydrogenase NADP binding domain//Integrase core domain//NAD dependent epimerase/dehydratase family//Integrase core domain//3-beta hydroxysteroid dehydrogenase/isomerase family	GO:0015074//GO:0008209//GO:0042254//GO:0008210//GO:0006694//GO:0006412//GO:0008207//GO:0055114	DNA integration//androgen metabolic process//ribosome biogenesis//estrogen metabolic process//steroid biosynthetic process//translation//C21-steroid hormone metabolic process//oxidation-reduction process	GO:0050662//GO:0003735//GO:0003824//GO:0016616//GO:0003854//GO:0016491	obsolete coenzyme binding//structural constituent of ribosome//catalytic activity//oxidoreductase activity, acting on the CH-OH group of donors, NAD or NADP as acceptor//3-beta-hydroxy-delta5-steroid dehydrogenase activity//oxidoreductase activity	GO:0005840	ribosome	--	--	FALSE	0.491472	0.562119	FALSE	-0.430973	0.597565	FALSE	-0.0502737	1	FALSE	0.222487	0.905566	FALSE	-0.258474	0.752675
Cluster-11149.17693	15.17	13.81	12.38	40.44	20.88	2052	1276268035	PIN23883.1	1542	2.3e-168	Sterol reductase/lamin B receptor [Handroanthus impetiginosus]	XM_013000824.1	XM_013000824	648	0	PREDICTED: Erythranthe guttatus 7-dehydrocholesterol reductase (LOC105975633), mRNA	K00213	DHCR7	7-dehydrocholesterol reductase	http://www.genome.jp/dbget-bin/www_bget?ko:K00213	Q9LDU6	1394	1.3e-152	7-dehydrocholesterol reductase OS=Arabidopsis thaliana OX=3702 GN=DWF5 PE=1 SV=1	PF01222//PF03838	Ergosterol biosynthesis ERG4/ERG24 family//Recombination protein U	GO:0006281//GO:0016126	DNA repair//sterol biosynthetic process	GO:0016628	oxidoreductase activity, acting on the CH-CH group of donors, NAD or NADP as acceptor	GO:0016020	membrane	KOG1435	Sterol reductase/lamin B receptor	FALSE	-1.34867	0.010915	FALSE	0.557044	0.428758	FALSE	-0.902367	0.0866134	FALSE	-0.740126	0.237271	FALSE	-0.233082	0.79579
Cluster-11149.27518	14.67	19.8	22.76	33.16	38.78	2425	1024009122	KZV32787.1	1358	6e-147	alcohol dehydrogenase-like 6 [Dorcoceras hygrometricum]	XM_011073784.2	XM_011073784	662	0	PREDICTED: Sesamum indicum alcohol dehydrogenase-like 6 (LOC105157374), mRNA	K00001	E1.1.1.1, adh	alcohol dehydrogenase	http://www.genome.jp/dbget-bin/www_bget?ko:K00001	Q8LEB2	1201	3.6e-130	Alcohol dehydrogenase-like 6 OS=Arabidopsis thaliana OX=3702 GN=At5g24760 PE=2 SV=2	PF00107//PF08240//PF02826//PF02254//PF03721	Zinc-binding dehydrogenase//Alcohol dehydrogenase GroES-like domain//D-isomer specific 2-hydroxyacid dehydrogenase, NAD binding domain//TrkA-N domain//UDP-glucose/GDP-mannose dehydrogenase family, NAD binding domain	GO:0006813//GO:0055114	potassium ion transport//oxidation-reduction process	GO:0051287//GO:0016616	NAD binding//oxidoreductase activity, acting on the CH-OH group of donors, NAD or NADP as acceptor	--	--	KOG0022	Alcohol dehydrogenase, class III	FALSE	-0.542971	0.476087	FALSE	-0.621937	0.357601	FALSE	-1.27567	0.00923724	FALSE	-0.500952	0.525955	FALSE	-1.17287	0.0196035
Cluster-11149.36003	10.96	11.57	8.31	23.83	14.25	6044	1276268509	PIN24299.1	2955	0	putative dehydrogenase [Handroanthus impetiginosus]	XM_020692242.1	XM_020692242	1405	0	PREDICTED: Sesamum indicum uncharacterized LOC105158074 (LOC105158074), transcript variant X2, mRNA	-	-	-	http://www.genome.jp/dbget-bin/www_bget?ko:-	Q0KBC7	686	4.7e-70	L-threonate dehydrogenase OS=Cupriavidus necator (strain ATCC 17699 / H16 / DSM 428 / Stanier 337) OX=381666 GN=ltnD PE=1 SV=1	PF02737//PF14833//PF03446//PF01116//PF03721//PF01979//PF02826	3-hydroxyacyl-CoA dehydrogenase, NAD binding domain//NAD-binding of NADP-dependent 3-hydroxyisobutyrate dehydrogenase//NAD binding domain of 6-phosphogluconate dehydrogenase//Fructose-bisphosphate aldolase class-II//UDP-glucose/GDP-mannose dehydrogenase family, NAD binding domain//Amidohydrolase family//D-isomer specific 2-hydroxyacid dehydrogenase, NAD binding domain	GO:0018874//GO:0006631//GO:0006574//GO:0005975//GO:0006633//GO:0006550//GO:0006568//GO:0006552//GO:0006554//GO:0055114	benzoate metabolic process//fatty acid metabolic process//valine catabolic process//carbohydrate metabolic process//fatty acid biosynthetic process//isoleucine catabolic process//tryptophan metabolic process//leucine catabolic process//lysine catabolic process//oxidation-reduction process	GO:0003857//GO:0050661//GO:0008270//GO:0016491//GO:0016616//GO:0016787//GO:0051287//GO:0016832	3-hydroxyacyl-CoA dehydrogenase activity//NADP binding//zinc ion binding//oxidoreductase activity//oxidoreductase activity, acting on the CH-OH group of donors, NAD or NADP as acceptor//hydrolase activity//NAD binding//aldehyde-lyase activity	--	--	KOG0409	Predicted dehydrogenase	FALSE	-0.84377	0.16284	FALSE	0.346422	0.707818	FALSE	-0.608118	0.278607	FALSE	-0.443665	0.58796	FALSE	-0.147248	0.9212
Cluster-11149.26955	13.42	22.57	24.11	39.31	41.64	2568	747079285	XP_011086837.1	1412	3.5e-153	glucose-6-phosphate 1-dehydrogenase, chloroplastic [Sesamum indicum]	XM_011088535.2	XM_011088535	675	0	PREDICTED: Sesamum indicum glucose-6-phosphate 1-dehydrogenase, chloroplastic (LOC105168446), mRNA	K00036	G6PD, zwf	glucose-6-phosphate 1-dehydrogenase [EC:1.1.1.49 1.1.1.363]	http://www.genome.jp/dbget-bin/www_bget?ko:K00036	Q43793	1236	3.4e-134	Glucose-6-phosphate 1-dehydrogenase, chloroplastic OS=Nicotiana tabacum OX=4097 PE=2 SV=1	PF00479//PF02781	Glucose-6-phosphate dehydrogenase, NAD binding domain//Glucose-6-phosphate dehydrogenase, C-terminal domain	GO:0006749//GO:0006006//GO:0006098//GO:0055114	glutathione metabolic process//glucose metabolic process//pentose-phosphate shunt//oxidation-reduction process	GO:0050661//GO:0004345//GO:0016614	NADP binding//glucose-6-phosphate dehydrogenase activity//oxidoreductase activity, acting on CH-OH group of donors	--	--	KOG0563	Glucose-6-phosphate 1-dehydrogenase	FALSE	-0.59979	0.394512	FALSE	-0.47897	0.532347	FALSE	-1.18952	0.0157618	FALSE	-0.875218	0.1399	DOWN	-1.40417	0.00407646
Cluster-11149.3645	1.63	3.84	2.77	9.35	4.87	1523	747090948	XP_011093187.1	1189	1.5e-127	glyoxylate/hydroxypyruvate reductase HPR3 [Sesamum indicum]	XM_011094885.2	XM_011094885	469	0	PREDICTED: Sesamum indicum glyoxylate/hydroxypyruvate reductase HPR3 (LOC105173205), mRNA	-	-	-	http://www.genome.jp/dbget-bin/www_bget?ko:-	Q9LE33	726	2.7e-75	Glyoxylate/hydroxypyruvate reductase HPR3 OS=Arabidopsis thaliana OX=3702 GN=HPR3 PE=2 SV=1	PF00558//PF02826//PF00899//PF03446//PF00389	Vpu protein//D-isomer specific 2-hydroxyacid dehydrogenase, NAD binding domain//ThiF family//NAD binding domain of 6-phosphogluconate dehydrogenase//D-isomer specific 2-hydroxyacid dehydrogenase, catalytic domain	GO:0032801//GO:0006812//GO:0019076//GO:0055114	receptor catabolic process//cation transport//viral release from host cell//oxidation-reduction process	GO:0005261//GO:0050661//GO:0008641//GO:0051287//GO:0016616	cation channel activity//NADP binding//ubiquitin-like modifier activating enzyme activity//NAD binding//oxidoreductase activity, acting on the CH-OH group of donors, NAD or NADP as acceptor	GO:0033644	host cell membrane	KOG0069	Glyoxylate/hydroxypyruvate reductase (D-isomer-specific 2-hydroxy acid dehydrogenase superfamily)	FALSE	-1.08045	0.0783343	FALSE	0.544642	0.485866	FALSE	-0.64639	0.301923	DOWN	-1.84352	0.0009088	FALSE	-1.34851	0.0200854
Cluster-11149.19752	2.12	10.65	1.77	0.45	3.12	2428	848917121	XP_012856020.1	1780	7e-196	PREDICTED: indole-3-pyruvate monooxygenase YUCCA2-like [Erythranthe guttata]	XM_011091003.2	XM_011091003	579	0	PREDICTED: Sesamum indicum indole-3-pyruvate monooxygenase YUCCA6 (LOC105170279), mRNA	K11816	YUCCA	indole-3-pyruvate monooxygenase	http://www.genome.jp/dbget-bin/www_bget?ko:K11816	Q8VZ59	1426	3e-156	Indole-3-pyruvate monooxygenase YUCCA6 OS=Arabidopsis thaliana OX=3702 GN=YUC6 PE=1 SV=1	PF01494//PF02254//PF07992//PF01266//PF00743	FAD binding domain//TrkA-N domain//Pyridine nucleotide-disulphide oxidoreductase//FAD dependent oxidoreductase//Flavin-binding monooxygenase-like	GO:0055114//GO:0006813	oxidation-reduction process//potassium ion transport	GO:0016491//GO:0071949//GO:0050660//GO:0050661//GO:0004499	oxidoreductase activity//FAD binding//flavin adenine dinucleotide binding//NADP binding//N,N-dimethylaniline monooxygenase activity	--	--	--	--	UP	4.77379	2.02e-17	DOWN	-3.19688	3.12e-08	UP	1.4657	0.00371463	UP	2.91556	8.6e-07	FALSE	-0.330654	0.71652
Cluster-11149.26423	24.83	23.18	25.41	56.94	45	1973	848863417	XP_012832472.1	630	1.3e-62	PREDICTED: 3-dehydrosphinganine reductase TSC10A [Erythranthe guttata]	XM_012977018.1	XM_012977018	352	0	PREDICTED: Erythranthe guttatus 3-dehydrosphinganine reductase TSC10A (LOC105953353), mRNA	K04708	E1.1.1.102	3-dehydrosphinganine reductase	http://www.genome.jp/dbget-bin/www_bget?ko:K04708	Q0WRJ2	442	3e-42	3-dehydrosphinganine reductase TSC10A OS=Arabidopsis thaliana OX=3702 GN=TSC10A PE=1 SV=1	PF02737//PF01073//PF01370//PF03435//PF00107//PF00006//PF02882//PF02983//PF12242	3-hydroxyacyl-CoA dehydrogenase, NAD binding domain//3-beta hydroxysteroid dehydrogenase/isomerase family//NAD dependent epimerase/dehydratase family//Saccharopine dehydrogenase NADP binding domain//Zinc-binding dehydrogenase//ATP synthase alpha/beta family, nucleotide-binding domain//Tetrahydrofolate dehydrogenase/cyclohydrolase, NAD(P)-binding domain//Alpha-lytic protease prodomain//NAD(P)H bin…	GO:0006554//GO:0006508//GO:0008207//GO:0055114//GO:0006633//GO:0006550//GO:0008209//GO:0006552//GO:0009396//GO:0006568//GO:0006574//GO:0006694//GO:0008210//GO:0018874//GO:0006631//GO:0046487	lysine catabolic process//proteolysis//C21-steroid hormone metabolic process//oxidation-reduction process//fatty acid biosynthetic process//isoleucine catabolic process//androgen metabolic process//leucine catabolic process//folic acid-containing compound biosynthetic process//tryptophan metabolic process//valine catabolic process//steroid biosynthetic process//estrogen metabolic process//benzoat…	GO:0008236//GO:0050662//GO:0016491//GO:0003854//GO:0004488//GO:0016616//GO:0003824//GO:0005524//GO:0003857	serine-type peptidase activity//obsolete coenzyme binding//oxidoreductase activity//3-beta-hydroxy-delta5-steroid dehydrogenase activity//methylenetetrahydrofolate dehydrogenase (NADP+) activity//oxidoreductase activity, acting on the CH-OH group of donors, NAD or NADP as acceptor//catalytic activity//ATP binding//3-hydroxyacyl-CoA dehydrogenase activity	GO:0005576	extracellular region	KOG1210	Predicted 3-ketosphinganine reductase	FALSE	-1.09467	0.0498728	FALSE	-0.056825	1	FALSE	-1.26225	0.0101609	FALSE	-0.522741	0.491383	FALSE	-0.629562	0.27383
Cluster-11149.27471	498.27	150.74	317.54	634.74	565.56	1779	1600707477	TEY89174.1	2140	9.2e-238	UDPglucose 6-dehydrogenase [Salvia splendens]	XM_011100422.2	XM_011100422	877	0	PREDICTED: Sesamum indicum UDP-glucose 6-dehydrogenase 1 (LOC105177312), transcript variant X2, mRNA	K00012	UGDH, ugd	UDPglucose 6-dehydrogenase	http://www.genome.jp/dbget-bin/www_bget?ko:K00012	Q96558	2050	9.5e-229	UDP-glucose 6-dehydrogenase 1 OS=Glycine max OX=3847 GN=UGD1 PE=2 SV=1	PF00984//PF03721//PF03720	UDP-glucose/GDP-mannose dehydrogenase family, central domain//UDP-glucose/GDP-mannose dehydrogenase family, NAD binding domain//UDP-glucose/GDP-mannose dehydrogenase family, UDP binding domain	GO:0055114	oxidation-reduction process	GO:0051287//GO:0016616	NAD binding//oxidoreductase activity, acting on the CH-OH group of donors, NAD or NADP as acceptor	--	--	KOG2666	UDP-glucose/GDP-mannose dehydrogenase	DOWN	-1.87158	0.000133605	FALSE	-0.230089	0.864286	DOWN	-2.21244	2.16e-06	FALSE	0.324805	0.78937	FALSE	0.0447072	1
Cluster-11149.29044	15.81	30.04	26.52	67.49	47.91	2427	747078356	XP_011086336.1	1972	3.8e-218	glyceraldehyde-3-phosphate dehydrogenase GAPCP2, chloroplastic [Sesamum indicum]	XM_011088034.2	XM_011088034	923	0	PREDICTED: Sesamum indicum glyceraldehyde-3-phosphate dehydrogenase GAPCP2, chloroplastic (LOC105168099), mRNA	K00134	GAPDH, gapA	glyceraldehyde 3-phosphate dehydrogenase	http://www.genome.jp/dbget-bin/www_bget?ko:K00134	Q5E924	1694	2.5e-187	Glyceraldehyde-3-phosphate dehydrogenase GAPCP2, chloroplastic OS=Arabidopsis thaliana OX=3702 GN=GAPCP2 PE=2 SV=1	PF00044//PF02826//PF02800//PF01113	Glyceraldehyde 3-phosphate dehydrogenase, NAD binding domain//D-isomer specific 2-hydroxyacid dehydrogenase, NAD binding domain//Glyceraldehyde 3-phosphate dehydrogenase, C-terminal domain//Dihydrodipicolinate reductase, N-terminus	GO:0009085//GO:0009089//GO:0055114	lysine biosynthetic process//lysine biosynthetic process via diaminopimelate//oxidation-reduction process	GO:0016620//GO:0051287//GO:0008839	oxidoreductase activity, acting on the aldehyde or oxo group of donors, NAD or NADP as acceptor//NAD binding//4-hydroxy-tetrahydrodipicolinate reductase	--	--	KOG0657	Glyceraldehyde 3-phosphate dehydrogenase	FALSE	-0.96674	0.0982896	FALSE	0.097935	1	FALSE	-0.979573	0.0535058	FALSE	-1.41867	0.00576906	FALSE	-1.37072	0.00523224
Cluster-11149.29249	31.8	28.79	18.24	37.8	33.08	3514	1600644176	TEY28168.1	1041	5e-110	casein kinase II subunit alpha [Salvia splendens]	XM_011101059.2	XM_011101059	440	0	PREDICTED: Sesamum indicum casein kinase II subunit alpha-2-like (LOC105177806), mRNA	K03097	CSNK2A	casein kinase II subunit alpha	http://www.genome.jp/dbget-bin/www_bget?ko:K03097	O64816	989	2e-105	Casein kinase II subunit alpha-4, chloroplastic OS=Arabidopsis thaliana OX=3702 GN=CKA4 PE=2 SV=1	PF07714//PF00984//PF00069	Protein tyrosine and serine/threonine kinase//UDP-glucose/GDP-mannose dehydrogenase family, central domain//Protein kinase domain	GO:0006468//GO:0055114	protein phosphorylation//oxidation-reduction process	GO:0051287//GO:0005524//GO:0004672//GO:0016616	NAD binding//ATP binding//protein kinase activity//oxidoreductase activity, acting on the CH-OH group of donors, NAD or NADP as acceptor	--	--	KOG0668	Casein kinase II, alpha subunit	FALSE	-0.192809	0.961935	FALSE	-0.203267	0.908935	FALSE	-0.506852	0.398387	FALSE	0.426518	0.618257	FALSE	0.173243	0.880763
Cluster-11149.31790	9.98	28.32	14.92	33.13	27.17	1094	1276263737	PIN20248.1	1280	3e-138	Lactate dehydrogenase [Handroanthus impetiginosus]	XM_011082929.2	XM_011082929	488	0	PREDICTED: Sesamum indicum L-lactate dehydrogenase B (LOC105164308), mRNA	K00016	LDH, ldh	L-lactate dehydrogenase	http://www.genome.jp/dbget-bin/www_bget?ko:K00016	P22989	991	3.7e-106	L-lactate dehydrogenase B (Fragment) OS=Hordeum vulgare OX=4513 PE=1 SV=1	PF00056//PF02866//PF02056	lactate/malate dehydrogenase, NAD binding domain//lactate/malate dehydrogenase, alpha/beta C-terminal domain//Family 4 glycosyl hydrolase	GO:0005975//GO:0055114	carbohydrate metabolic process//oxidation-reduction process	GO:0004553//GO:0016491//GO:0016616	hydrolase activity, hydrolyzing O-glycosyl compounds//oxidoreductase activity//oxidoreductase activity, acting on the CH-OH group of donors, NAD or NADP as acceptor	--	--	KOG1495	Lactate dehydrogenase	FALSE	-0.0197185	1	FALSE	-0.111466	1	FALSE	-0.24194	0.770358	FALSE	-1.05944	0.0675373	FALSE	-1.22081	0.018335
Cluster-11149.33084	25.93	32.62	56.11	65.85	103.47	529	1600635708	TEY21115.1	564	1.5e-55	cinnamoyl-CoA reductase [Salvia splendens]	EU338487.1	EU338487	271	1.32e-137	Paulownia sp. ZKC-2008 cinnamoyl-CoA reductase mRNA, complete cds	K09753	CCR	cinnamoyl-CoA reductase	http://www.genome.jp/dbget-bin/www_bget?ko:K09753	Q9S9N9	481	2.4e-47	Cinnamoyl-CoA reductase 1 OS=Arabidopsis thaliana OX=3702 GN=CCR1 PE=1 SV=1	PF01370//PF01073	NAD dependent epimerase/dehydratase family//3-beta hydroxysteroid dehydrogenase/isomerase family	GO:0055114//GO:0008207//GO:0008209//GO:0008210//GO:0006694	oxidation-reduction process//C21-steroid hormone metabolic process//androgen metabolic process//estrogen metabolic process//steroid biosynthetic process	GO:0003824//GO:0016616//GO:0003854//GO:0050662	catalytic activity//oxidoreductase activity, acting on the CH-OH group of donors, NAD or NADP as acceptor//3-beta-hydroxy-delta5-steroid dehydrogenase activity//obsolete coenzyme binding	--	--	--	--	FALSE	-0.786625	0.239342	FALSE	-1.05204	0.0596765	DOWN	-1.94933	6.12e-05	FALSE	-0.686308	0.323875	DOWN	-1.78821	0.000301576
Cluster-11149.31935	19.54	28.82	41.34	49.64	76.39	1414	187609478	ACD13265.1	1150	4.6e-123	cinnamoyl-CoA reductase [Paulownia sp. ZKC-2008]	EU338487.1	EU338487	526	0	Paulownia sp. ZKC-2008 cinnamoyl-CoA reductase mRNA, complete cds	K09753	CCR	cinnamoyl-CoA reductase	http://www.genome.jp/dbget-bin/www_bget?ko:K09753	Q9S9N9	1046	2e-112	Cinnamoyl-CoA reductase 1 OS=Arabidopsis thaliana OX=3702 GN=CCR1 PE=1 SV=1	PF01370//PF01073	NAD dependent epimerase/dehydratase family//3-beta hydroxysteroid dehydrogenase/isomerase family	GO:0008207//GO:0055114//GO:0008210//GO:0006694//GO:0008209	C21-steroid hormone metabolic process//oxidation-reduction process//estrogen metabolic process//steroid biosynthetic process//androgen metabolic process	GO:0003854//GO:0003824//GO:0016616//GO:0050662	3-beta-hydroxy-delta5-steroid dehydrogenase activity//catalytic activity//oxidoreductase activity, acting on the CH-OH group of donors, NAD or NADP as acceptor//obsolete coenzyme binding	--	--	--	--	FALSE	-0.58	0.423443	FALSE	-1.01879	0.0646276	DOWN	-1.7097	0.000341063	FALSE	-0.672318	0.312063	DOWN	-1.74107	0.000299659
Cluster-11149.12882	0.4	0.9	0.76	1.75	1.42	1527	1389786512	XP_024992597.1	147	1e-06	integrin-linked protein kinase 1-like isoform X1 [Cynara cardunculus var. scolymus]	XM_020695108.1	XM_020695108	70	2.17e-25	PREDICTED: Sesamum indicum serine/threonine-protein kinase STY8 (LOC105165585), transcript variant X2, mRNA	-	-	-	http://www.genome.jp/dbget-bin/www_bget?ko:-	--	--	--	--	PF13333//PF02317	Integrase core domain//NAD/NADP octopine/nopaline dehydrogenase, alpha-helical domain	GO:0055114//GO:0015074	oxidation-reduction process//DNA integration	GO:0016491//GO:0050662	oxidoreductase activity//obsolete coenzyme binding	--	--	--	--	FALSE	-0.760989	0.448051	FALSE	-0.0888124	1	FALSE	-0.959719	0.180287	FALSE	-1.45635	0.0845543	FALSE	-1.59342	0.0393902
Cluster-11149.26275	24.22	20.59	17.6	17.4	33.02	1841	747041289	XP_011072253.1	1136	2.5e-121	bifunctional UDP-glucose 4-epimerase and UDP-xylose 4-epimerase 1-like [Sesamum indicum]	XM_011073951.2	XM_011073951	405	0	PREDICTED: Sesamum indicum bifunctional UDP-glucose 4-epimerase and UDP-xylose 4-epimerase 1-like (LOC105157539), mRNA	K01784	galE, GALE	UDP-glucose 4-epimerase	http://www.genome.jp/dbget-bin/www_bget?ko:K01784	Q42605	1034	6.4e-111	Bifunctional UDP-glucose 4-epimerase and UDP-xylose 4-epimerase 1 OS=Arabidopsis thaliana OX=3702 GN=UGE1 PE=1 SV=2	PF03721//PF03435//PF01073//PF02737//PF01370	UDP-glucose/GDP-mannose dehydrogenase family, NAD binding domain//Saccharopine dehydrogenase NADP binding domain//3-beta hydroxysteroid dehydrogenase/isomerase family//3-hydroxyacyl-CoA dehydrogenase, NAD binding domain//NAD dependent epimerase/dehydratase family	GO:0006633//GO:0008209//GO:0006550//GO:0006552//GO:0006568//GO:0006554//GO:0055114//GO:0008207//GO:0008210//GO:0006694//GO:0006631//GO:0018874//GO:0006574	fatty acid biosynthetic process//androgen metabolic process//isoleucine catabolic process//leucine catabolic process//tryptophan metabolic process//lysine catabolic process//oxidation-reduction process//C21-steroid hormone metabolic process//estrogen metabolic process//steroid biosynthetic process//fatty acid metabolic process//benzoate metabolic process//valine catabolic process	GO:0050662//GO:0051287//GO:0003857//GO:0003854//GO:0016491//GO:0016616//GO:0003824	obsolete coenzyme binding//NAD binding//3-hydroxyacyl-CoA dehydrogenase activity//3-beta-hydroxy-delta5-steroid dehydrogenase activity//oxidoreductase activity//oxidoreductase activity, acting on the CH-OH group of donors, NAD or NADP as acceptor//catalytic activity	--	--	KOG1371	UDP-glucose 4-epimerase/UDP-sulfoquinovose synthase	FALSE	0.445437	0.601283	FALSE	-1.32085	0.0119331	FALSE	-0.986174	0.05388	FALSE	1.15127	0.035116	FALSE	-0.219565	0.812308
Cluster-11149.12998	6.38	5.87	3.92	6.24	7.78	899	1276264457	PIN20861.1	991	8e-105	Flavin-containing monooxygenase [Handroanthus impetiginosus]	--	--	--	--	--	-	-	-	http://www.genome.jp/dbget-bin/www_bget?ko:-	Q9SXD5	571	1.5e-57	Flavin-containing monooxygenase FMO GS-OX-like 3 OS=Arabidopsis thaliana OX=3702 GN=At1g62620 PE=2 SV=2	PF07992//PF00743	Pyridine nucleotide-disulphide oxidoreductase//Flavin-binding monooxygenase-like	GO:0055114	oxidation-reduction process	GO:0016491//GO:0050660//GO:0050661//GO:0004499	oxidoreductase activity//flavin adenine dinucleotide binding//NADP binding//N,N-dimethylaniline monooxygenase activity	--	--	--	--	FALSE	0.119904	1	FALSE	-0.715531	0.344714	FALSE	-0.70621	0.273386	FALSE	0.699669	0.362672	FALSE	-0.0657471	1
Cluster-13411.0	0.89	1.26	0.18	0.18	0.36	491	--	--	--	--	--	--	--	--	--	--	--	--	--	--	--	--	--	--	PF02800	Glyceraldehyde 3-phosphate dehydrogenase, C-terminal domain	GO:0055114	oxidation-reduction process	GO:0016620	oxidoreductase activity, acting on the aldehyde or oxo group of donors, NAD or NADP as acceptor	--	--	--	--	FALSE	2.91002	0.205855	FALSE	-1.3065	1	FALSE	1.48426	0.517719	FALSE	2.82217	0.378347	FALSE	1.46623	0.717726
Cluster-11149.31216	16.22	26.41	26.32	31.91	52.88	1183	747067287	XP_011080358.1	1414	9.3e-154	cinnamoyl-CoA reductase 1 [Sesamum indicum]	XM_011082056.2	XM_011082056	545	0	PREDICTED: Sesamum indicum cinnamoyl-CoA reductase 1 (LOC105163632), mRNA	-	-	-	http://www.genome.jp/dbget-bin/www_bget?ko:-	Q9S9N9	769	2.2e-80	Cinnamoyl-CoA reductase 1 OS=Arabidopsis thaliana OX=3702 GN=CCR1 PE=1 SV=1	PF01073//PF01370	3-beta hydroxysteroid dehydrogenase/isomerase family//NAD dependent epimerase/dehydratase family	GO:0008207//GO:0055114//GO:0008209//GO:0006694//GO:0008210	C21-steroid hormone metabolic process//oxidation-reduction process//androgen metabolic process//steroid biosynthetic process//estrogen metabolic process	GO:0016616//GO:0003824//GO:0003854//GO:0050662	oxidoreductase activity, acting on the CH-OH group of donors, NAD or NADP as acceptor//catalytic activity//3-beta-hydroxy-delta5-steroid dehydrogenase activity//obsolete coenzyme binding	--	--	--	--	FALSE	-0.0671352	1	FALSE	-1.12602	0.037767	FALSE	-1.3039	0.00828207	FALSE	-0.304708	0.806498	DOWN	-1.48067	0.00268923
Cluster-11149.31915	14.04	16.1	18.56	87.84	37.39	520	927976450	ALE33748.1	477	1.8e-45	zeta-carotene desaturase 1 [Erythranthe lewisii]	XM_011080435.2	XM_011080435	147	1.11e-68	PREDICTED: Sesamum indicum zeta-carotene desaturase, chloroplastic/chromoplastic (LOC105162430), mRNA	K00514	ZDS, crtQ	zeta-carotene desaturase	http://www.genome.jp/dbget-bin/www_bget?ko:K00514	Q9FV46	415	1.1e-39	Zeta-carotene desaturase, chloroplastic/chromoplastic OS=Tagetes erecta OX=13708 PE=2 SV=1	PF01593//PF00743//PF01266//PF02737//PF07992//PF06100//PF01494	Flavin containing amine oxidoreductase//Flavin-binding monooxygenase-like//FAD dependent oxidoreductase//3-hydroxyacyl-CoA dehydrogenase, NAD binding domain//Pyridine nucleotide-disulphide oxidoreductase//MCRA family//FAD binding domain	GO:0055114//GO:0006554//GO:0006568//GO:0006552//GO:0006550//GO:0006633//GO:0006574//GO:0018874//GO:0006631	oxidation-reduction process//lysine catabolic process//tryptophan metabolic process//leucine catabolic process//isoleucine catabolic process//fatty acid biosynthetic process//valine catabolic process//benzoate metabolic process//fatty acid metabolic process	GO:0050660//GO:0016491//GO:0004499//GO:0050151//GO:0003857//GO:0050661//GO:0071949	flavin adenine dinucleotide binding//oxidoreductase activity//N,N-dimethylaniline monooxygenase activity//oleate hydratase activity//3-hydroxyacyl-CoA dehydrogenase activity//NADP binding//FAD binding	--	--	--	--	DOWN	-2.21909	1.53e-05	FALSE	0.831403	0.180864	DOWN	-1.4982	0.00427234	DOWN	-1.98681	0.000141616	FALSE	-1.20523	0.0279808
Cluster-8002.0	0	0	0.31	0.31	0.63	526	604304721	EYU23972.1	410	1.1e-37	hypothetical protein MIMGU_mgv1a009951mg [Erythranthe guttata]	XM_012972055.1	XM_012972055	90	5.45e-37	PREDICTED: Erythranthe guttatus twinkle homolog protein, chloroplastic/mitochondrial (LOC105948822), transcript variant X2, mRNA	-	-	-	http://www.genome.jp/dbget-bin/www_bget?ko:-	Q500U8	349	4.9e-32	Tetraketide alpha-pyrone reductase 1 OS=Arabidopsis thaliana OX=3702 GN=TKPR1 PE=1 SV=1	PF01073//PF01370	3-beta hydroxysteroid dehydrogenase/isomerase family//NAD dependent epimerase/dehydratase family	GO:0006694//GO:0008210//GO:0008209//GO:0055114//GO:0008207	steroid biosynthetic process//estrogen metabolic process//androgen metabolic process//oxidation-reduction process//C21-steroid hormone metabolic process	GO:0050662//GO:0003854//GO:0003824//GO:0016616	obsolete coenzyme binding//3-beta-hydroxy-delta5-steroid dehydrogenase activity//catalytic activity//oxidoreductase activity, acting on the CH-OH group of donors, NAD or NADP as acceptor	--	--	--	--	FALSE	-3.97	0.835728	FALSE	-1.36283	0.794971	FALSE	-5.18243	0.273386	FALSE	-3.80692	0.806498	FALSE	-4.9488	0.278772
Cluster-11149.40635	3.72	4.45	3.4	15.26	7.14	1140	1276253539	PIN11765.1	241	9.4e-18	Glutamate/leucine/phenylalanine/valine dehydrogenase [Handroanthus impetiginosus]	XM_023902645.1	XM_023902645	73	3.45e-27	PREDICTED: Lactuca sativa NADP-specific glutamate dehydrogenase (LOC111906865), transcript variant X2, mRNA	K00262	E1.4.1.4, gdhA	glutamate dehydrogenase (NADP+)	http://www.genome.jp/dbget-bin/www_bget?ko:K00262	--	--	--	--	PF00208	Glutamate/Leucine/Phenylalanine/Valine dehydrogenase	GO:0006520//GO:0055114	cellular amino acid metabolic process//oxidation-reduction process	GO:0016491	oxidoreductase activity	--	--	--	--	DOWN	-1.56991	0.00452079	FALSE	0.696869	0.31466	FALSE	-0.983549	0.0900043	FALSE	-1.36222	0.0172806	FALSE	-0.715202	0.263095
Cluster-11149.29757	3.54	15.95	8.93	16.48	18.86	3208	747051234	XP_011071705.1	1112	2.7e-118	malate dehydrogenase, chloroplastic-like [Sesamum indicum]	XM_011073403.2	XM_011073403	688	0	PREDICTED: Sesamum indicum malate dehydrogenase, chloroplastic-like (LOC105157102), mRNA	K00026	MDH2	malate dehydrogenase	http://www.genome.jp/dbget-bin/www_bget?ko:K00026	Q9SN86	825	1.9e-86	Malate dehydrogenase, chloroplastic OS=Arabidopsis thaliana OX=3702 GN=At3g47520 PE=1 SV=1	PF01073//PF01118//PF01370//PF00056//PF02866//PF01113	3-beta hydroxysteroid dehydrogenase/isomerase family//Semialdehyde dehydrogenase, NAD binding domain//NAD dependent epimerase/dehydratase family//lactate/malate dehydrogenase, NAD binding domain//lactate/malate dehydrogenase, alpha/beta C-terminal domain//Dihydrodipicolinate reductase, N-terminus	GO:0009085//GO:0008207//GO:0055114//GO:0008210//GO:0006694//GO:0009089//GO:0008209	lysine biosynthetic process//C21-steroid hormone metabolic process//oxidation-reduction process//estrogen metabolic process//steroid biosynthetic process//lysine biosynthetic process via diaminopimelate//androgen metabolic process	GO:0051287//GO:0016491//GO:0003854//GO:0003824//GO:0008839//GO:0016616//GO:0016620//GO:0050662	NAD binding//oxidoreductase activity//3-beta-hydroxy-delta5-steroid dehydrogenase activity//catalytic activity//4-hydroxy-tetrahydrodipicolinate reductase//oxidoreductase activity, acting on the CH-OH group of donors, NAD or NADP as acceptor//oxidoreductase activity, acting on the aldehyde or oxo group of donors, NAD or NADP as acceptor//obsolete coenzyme binding	--	--	KOG1494	NAD-dependent malate dehydrogenase	FALSE	0.152597	1	FALSE	-0.590339	0.380942	FALSE	-0.548511	0.348189	DOWN	-1.54243	0.0028377	DOWN	-2.18268	5.82e-06
Cluster-11149.27597	57.63	84.77	61.44	192.11	133.97	1498	1279028445	XP_022873455.1	1812	8.4e-200	formate dehydrogenase, mitochondrial [Olea europaea var. sylvestris]	XM_011100182.2	XM_011100182	737	0	PREDICTED: Sesamum indicum formate dehydrogenase, mitochondrial (LOC105177138), mRNA	K00122	FDH	formate dehydrogenase	http://www.genome.jp/dbget-bin/www_bget?ko:K00122	Q07511	1745	1.9e-193	Formate dehydrogenase, mitochondrial OS=Solanum tuberosum OX=4113 GN=FDH1 PE=1 SV=2	PF03446//PF00389//PF02826	NAD binding domain of 6-phosphogluconate dehydrogenase//D-isomer specific 2-hydroxyacid dehydrogenase, catalytic domain//D-isomer specific 2-hydroxyacid dehydrogenase, NAD binding domain	GO:0055114	oxidation-reduction process	GO:0050661//GO:0051287//GO:0016616	NADP binding//NAD binding//oxidoreductase activity, acting on the CH-OH group of donors, NAD or NADP as acceptor	--	--	KOG0068	D-3-phosphoglycerate dehydrogenase, D-isomer-specific 2-hydroxy acid dehydrogenase superfamily	FALSE	-0.976613	0.0919242	FALSE	0.123198	1	FALSE	-0.964189	0.0576412	FALSE	-1.06393	0.0536275	FALSE	-0.99073	0.0521258
Cluster-11149.35594	0.91	0.94	1.14	1.69	2.58	1846	1276241076	PIN02386.1	2109	3.8e-234	Squalene monooxygenase [Handroanthus impetiginosus]	XM_011094164.2	XM_011094164	750	0	PREDICTED: Sesamum indicum squalene monooxygenase-like (LOC105172646), mRNA	K00511	SQLE, ERG1	squalene monooxygenase	http://www.genome.jp/dbget-bin/www_bget?ko:K00511	O48651	1906	4.9e-212	Squalene monooxygenase SE1 OS=Panax ginseng OX=4054 GN=SQE1 PE=2 SV=1	PF08491//PF03006//PF07992//PF01210//PF01266//PF01494	Squalene epoxidase//Haemolysin-III related//Pyridine nucleotide-disulphide oxidoreductase//NAD-dependent glycerol-3-phosphate dehydrogenase N-terminus//FAD dependent oxidoreductase//FAD binding domain	GO:0016114//GO:0046168//GO:0055114//GO:0006694	terpenoid biosynthetic process//glycerol-3-phosphate catabolic process//oxidation-reduction process//steroid biosynthetic process	GO:0051287//GO:0016491//GO:0016616//GO:0050660//GO:0071949//GO:0004506	NAD binding//oxidoreductase activity//oxidoreductase activity, acting on the CH-OH group of donors, NAD or NADP as acceptor//flavin adenine dinucleotide binding//FAD binding//squalene monooxygenase activity	GO:0016021	integral component of membrane	KOG1298	Squalene monooxygenase	FALSE	-0.637417	0.556125	FALSE	-1.00596	0.136285	DOWN	-1.75344	0.00275156	FALSE	-0.224011	0.977626	FALSE	-1.27931	0.0381032
Cluster-11149.16410	0.27	1.69	0.88	0.61	2.01	2260	1276248458	PIN07802.1	2371	1.9e-264	Acyl-CoA reductase [Handroanthus impetiginosus]	XM_011080500.2	XM_011080500	977	0	PREDICTED: Sesamum indicum fatty acyl-CoA reductase 2 (LOC105162476), mRNA	K13356	FAR	alcohol-forming fatty acyl-CoA reductase	http://www.genome.jp/dbget-bin/www_bget?ko:K13356	Q08891	1748	1.3e-193	Fatty acyl-CoA reductase 2 OS=Arabidopsis thaliana OX=3702 GN=FAR2 PE=1 SV=2	PF01370//PF01073//PF03435	NAD dependent epimerase/dehydratase family//3-beta hydroxysteroid dehydrogenase/isomerase family//Saccharopine dehydrogenase NADP binding domain	GO:0055114//GO:0008207//GO:0006694//GO:0008210//GO:0008209	oxidation-reduction process//C21-steroid hormone metabolic process//steroid biosynthetic process//estrogen metabolic process//androgen metabolic process	GO:0016491//GO:0003854//GO:0003824//GO:0016616//GO:0050662	oxidoreductase activity//3-beta-hydroxy-delta5-steroid dehydrogenase activity//catalytic activity//oxidoreductase activity, acting on the CH-OH group of donors, NAD or NADP as acceptor//obsolete coenzyme binding	--	--	KOG1221	Acyl-CoA reductase	FALSE	1.66807	0.0107999	DOWN	-2.11578	0.000431521	FALSE	-0.558503	0.435539	FALSE	-0.475266	0.857828	DOWN	-2.63874	3.16e-05
Cluster-11149.34471	3.55	4.01	2.54	6.82	5.83	3985	747088120	XP_011091632.1	1858	1e-204	3beta-hydroxysteroid-dehydrogenase/decarboxylase isoform X1 [Sesamum indicum]	XM_011093330.2	XM_011093330	693	0	PREDICTED: Sesamum indicum 3beta-hydroxysteroid-dehydrogenase/decarboxylase (LOC105172010), transcript variant X1, mRNA	K07748	E1.1.1.170, NSDHL, ERG26	sterol-4alpha-carboxylate 3-dehydrogenase (decarboxylating)	http://www.genome.jp/dbget-bin/www_bget?ko:K07748	A9X4U2	1108	3.6e-119	3beta-hydroxysteroid-dehydrogenase/decarboxylase isoform 3 OS=Arabidopsis thaliana OX=3702 GN=3BETAHSD/D3 PE=2 SV=2	PF01073//PF03435//PF01370	3-beta hydroxysteroid dehydrogenase/isomerase family//Saccharopine dehydrogenase NADP binding domain//NAD dependent epimerase/dehydratase family	GO:0008210//GO:0006694//GO:0008209//GO:0008207//GO:0055114	estrogen metabolic process//steroid biosynthetic process//androgen metabolic process//C21-steroid hormone metabolic process//oxidation-reduction process	GO:0050662//GO:0003854//GO:0016491//GO:0016616//GO:0003824	obsolete coenzyme binding//3-beta-hydroxy-delta5-steroid dehydrogenase activity//oxidoreductase activity//oxidoreductase activity, acting on the CH-OH group of donors, NAD or NADP as acceptor//catalytic activity	--	--	KOG1430	C-3 sterol dehydrogenase/3-beta-hydroxysteroid dehydrogenase and related dehydrogenases	FALSE	-0.567334	0.461317	FALSE	-0.169661	0.958532	FALSE	-0.847716	0.113122	FALSE	-0.266811	0.840104	FALSE	-0.486441	0.44892
Cluster-11149.32559	25.09	20.12	21.48	40.05	50.21	1296	848921217	XP_012857359.1	1307	2.6e-141	PREDICTED: NADPH--cytochrome P450 reductase-like [Erythranthe guttata]	XM_013001905.1	XM_013001905	584	0	PREDICTED: Erythranthe guttatus NADPH--cytochrome P450 reductase-like (LOC105976651), mRNA	K00327	POR	NADPH-ferrihemoprotein reductase	http://www.genome.jp/dbget-bin/www_bget?ko:K00327	Q05001	1144	7.9e-124	NADPH--cytochrome P450 reductase OS=Catharanthus roseus OX=4058 GN=CPR PE=2 SV=1	PF00667//PF06451//PF00258	FAD binding domain//Moricin//Flavodoxin	GO:0042742//GO:0055114	defense response to bacterium//oxidation-reduction process	GO:0010181//GO:0016491	FMN binding//oxidoreductase activity	GO:0005576	extracellular region	KOG1158	NADP/FAD dependent oxidoreductase	FALSE	-0.788627	0.219758	FALSE	-0.723273	0.253737	DOWN	-1.62263	0.00078889	FALSE	-0.00282873	1	FALSE	-0.77608	0.154879
Cluster-11149.47546	1.33	1.19	1.98	3.32	4.74	1432	747044232	XP_011087975.1	2074	3.3e-230	polyamine oxidase 1 [Sesamum indicum]	XM_011089673.2	XM_011089673	792	0	PREDICTED: Sesamum indicum polyamine oxidase 1 (LOC105169299), mRNA	K13366	MPAO, PAO1	polyamine oxidase [EC:1.5.3.14 1.5.3.16 1.5.3.-]	http://www.genome.jp/dbget-bin/www_bget?ko:K13366	Q9FNA2	1804	2.6e-200	Polyamine oxidase 1 OS=Arabidopsis thaliana OX=3702 GN=PAO1 PE=1 SV=1	PF07992//PF01494//PF01593//PF00743//PF01266	Pyridine nucleotide-disulphide oxidoreductase//FAD binding domain//Flavin containing amine oxidoreductase//Flavin-binding monooxygenase-like//FAD dependent oxidoreductase	GO:0055114	oxidation-reduction process	GO:0016491//GO:0071949//GO:0050660//GO:0050661//GO:0004499	oxidoreductase activity//FAD binding//flavin adenine dinucleotide binding//NADP binding//N,N-dimethylaniline monooxygenase activity	--	--	--	--	FALSE	-1.27225	0.0663758	FALSE	-0.906821	0.174124	DOWN	-2.289	4.97e-05	FALSE	-0.649063	0.474883	FALSE	-1.60525	0.00579666
Cluster-11149.26614	9.38	13.61	8.87	25.98	21.29	3302	1173785500	XP_020548208.1	1727	1.3e-189	NADP-specific glutamate dehydrogenase isoform X1 [Sesamum indicum]	XM_020692550.1	XM_020692550	767	0	PREDICTED: Sesamum indicum NADP-specific glutamate dehydrogenase (LOC105157721), transcript variant X2, mRNA	K00262	E1.4.1.4, gdhA	glutamate dehydrogenase (NADP+)	http://www.genome.jp/dbget-bin/www_bget?ko:K00262	P28724	582	3e-58	NADP-specific glutamate dehydrogenase OS=Giardia intestinalis OX=5741 PE=2 SV=1	PF02812//PF04176//PF13181//PF00208	Glu/Leu/Phe/Val dehydrogenase, dimerisation domain//TIP41-like family//Tetratricopeptide repeat//Glutamate/Leucine/Phenylalanine/Valine dehydrogenase	GO:0043666//GO:0055114//GO:0006520	regulation of phosphoprotein phosphatase activity//oxidation-reduction process//cellular amino acid metabolic process	GO:0005515//GO:0016491	protein binding//oxidoreductase activity	--	--	KOG2250	Glutamate/leucine/phenylalanine/valine dehydrogenases	FALSE	-0.733004	0.254581	FALSE	-0.108832	1	FALSE	-0.952596	0.063107	FALSE	-0.793538	0.197272	FALSE	-0.952354	0.0648024
Cluster-11149.25918	41.95	50.39	30.09	78.87	74.21	8182	1562667900	RXI08274.1	9003	0	hypothetical protein DVH24_022418 [Malus domestica]	XM_011077706.2	XM_011077706	4450	0	PREDICTED: Sesamum indicum glutamate synthase 1 [NADH], chloroplastic (LOC105160371), transcript variant X1, mRNA	K00264	GLT1	glutamate synthase (NADPH/NADH) [EC:1.4.1.13 1.4.1.14]	http://www.genome.jp/dbget-bin/www_bget?ko:K00264	Q0JKD0	8174	0	Glutamate synthase 1 [NADH], chloroplastic OS=Oryza sativa subsp. japonica OX=39947 GN=Os01g0681900 PE=2 SV=1	PF00743//PF02826//PF00069//PF07714//PF04898//PF01494//PF07992//PF01493//PF01645//PF01266//PF08052//PF01593	Flavin-binding monooxygenase-like//D-isomer specific 2-hydroxyacid dehydrogenase, NAD binding domain//Protein kinase domain//Protein tyrosine and serine/threonine kinase//Glutamate synthase central domain//FAD binding domain//Pyridine nucleotide-disulphide oxidoreductase//GXGXG motif//Conserved region in glutamate synthase//FAD dependent oxidoreductase//PyrBI operon leader peptide//Flavin contain…	GO:0019856//GO:0006468//GO:0006807//GO:0055114//GO:0006537	pyrimidine nucleobase biosynthetic process//protein phosphorylation//nitrogen compound metabolic process//oxidation-reduction process//glutamate biosynthetic process	GO:0051287//GO:0016638//GO:0016491//GO:0004672//GO:0015930//GO:0050660//GO:0050661//GO:0071949//GO:0005524//GO:0004499	NAD binding//oxidoreductase activity, acting on the CH-NH2 group of donors//oxidoreductase activity//protein kinase activity//glutamate synthase activity//flavin adenine dinucleotide binding//NADP binding//FAD binding//ATP binding//N,N-dimethylaniline monooxygenase activity	--	--	KOG0399	Glutamate synthase	FALSE	-0.447779	0.58209	FALSE	-0.307534	0.770638	FALSE	-0.866095	0.0955803	FALSE	-0.233619	0.873388	FALSE	-0.59116	0.295297
Cluster-11149.9082	4.27	3.06	2.1	7.37	5.26	3030	747080667	XP_011087592.1	1312	1.6e-141	cinnamoyl-CoA reductase 2 [Sesamum indicum]	XM_011089290.2	XM_011089290	570	0	PREDICTED: Sesamum indicum cinnamoyl-CoA reductase 2 (LOC105169032), mRNA	-	-	-	http://www.genome.jp/dbget-bin/www_bget?ko:-	Q9S9N9	489	1.7e-47	Cinnamoyl-CoA reductase 1 OS=Arabidopsis thaliana OX=3702 GN=CCR1 PE=1 SV=1	PF01370//PF01073	NAD dependent epimerase/dehydratase family//3-beta hydroxysteroid dehydrogenase/isomerase family	GO:0055114//GO:0008207//GO:0008210//GO:0006694//GO:0008209	oxidation-reduction process//C21-steroid hormone metabolic process//estrogen metabolic process//steroid biosynthetic process//androgen metabolic process	GO:0003854//GO:0003824//GO:0016616//GO:0050662	3-beta-hydroxy-delta5-steroid dehydrogenase activity//catalytic activity//oxidoreductase activity, acting on the CH-OH group of donors, NAD or NADP as acceptor//obsolete coenzyme binding	--	--	--	--	FALSE	-1.068	0.0709422	FALSE	0.0907457	1	FALSE	-1.08792	0.0376684	FALSE	-0.111065	1	FALSE	-0.0703084	1
Cluster-11149.12999	1.02	1.05	1.35	4.43	3.42	1294	1276264458	PIN20862.1	688	1.6e-69	Flavin-containing monooxygenase [Handroanthus impetiginosus]	XM_012990132.1	XM_012990132	61	1.84e-20	PREDICTED: Erythranthe guttatus flavin-containing monooxygenase FMO GS-OX5-like (LOC105965570), mRNA	-	-	-	http://www.genome.jp/dbget-bin/www_bget?ko:-	A8MRX0	500	3.7e-49	Flavin-containing monooxygenase FMO GS-OX5 OS=Arabidopsis thaliana OX=3702 GN=FMOGS-OX5 PE=1 SV=2	PF07992//PF03446//PF10550//PF02254//PF03721//PF01593//PF02737//PF01494//PF08290//PF01266//PF00743//PF01210	Pyridine nucleotide-disulphide oxidoreductase//NAD binding domain of 6-phosphogluconate dehydrogenase//Conantokin toxin//TrkA-N domain//UDP-glucose/GDP-mannose dehydrogenase family, NAD binding domain//Flavin containing amine oxidoreductase//3-hydroxyacyl-CoA dehydrogenase, NAD binding domain//FAD binding domain//Hepatitis core protein, putative zinc finger//FAD dependent oxidoreductase//Flavin-b…	GO:0006633//GO:0006568//GO:0006552//GO:0006550//GO:0006554//GO:0046168//GO:0006813//GO:0055114//GO:0006631//GO:0018874//GO:0009405//GO:0006574	fatty acid biosynthetic process//tryptophan metabolic process//leucine catabolic process//isoleucine catabolic process//lysine catabolic process//glycerol-3-phosphate catabolic process//potassium ion transport//oxidation-reduction process//fatty acid metabolic process//benzoate metabolic process//pathogenesis//valine catabolic process	GO:0050660//GO:0051287//GO:0050661//GO:0003857//GO:0071949//GO:0004499//GO:0005198//GO:0016491//GO:0016616	flavin adenine dinucleotide binding//NAD binding//NADP binding//3-hydroxyacyl-CoA dehydrogenase activity//FAD binding//N,N-dimethylaniline monooxygenase activity//structural molecule activity//oxidoreductase activity//oxidoreductase activity, acting on the CH-OH group of donors, NAD or NADP as acceptor	GO:0035792	host cell postsynaptic membrane	--	--	DOWN	-1.86307	0.00376649	FALSE	-0.0240791	1	DOWN	-1.9968	0.000766515	FALSE	-1.44893	0.036644	FALSE	-1.52219	0.0155251
Cluster-11149.31110	12.07	22.29	26.25	56.69	69.27	2115	604299185	EYU19120.1	1718	9.4e-189	hypothetical protein MIMGU_mgv1a008446mg [Erythranthe guttata]	XM_011098382.2	XM_011098382	718	0	PREDICTED: Sesamum indicum ferredoxin--NADP reductase, root-type isozyme, chloroplastic-like (LOC105175792), mRNA	K02641	petH	ferredoxin--NADP+ reductase	http://www.genome.jp/dbget-bin/www_bget?ko:K02641	Q41014	1562	4.4e-172	Ferredoxin--NADP reductase, root isozyme, chloroplastic OS=Pisum sativum OX=3888 PE=2 SV=2	PF00175//PF00667	oxidoreductase NAD-binding domain//FAD binding domain	GO:0055114	oxidation-reduction process	GO:0016491	oxidoreductase activity	--	--	KOG1158	NADP/FAD dependent oxidoreductase	FALSE	-1.14508	0.0376237	FALSE	-0.685563	0.283954	DOWN	-1.94139	3.91e-05	DOWN	-1.55698	0.00217906	DOWN	-2.29251	1.32e-06
Cluster-11149.41361	5.72	5.79	8.53	2.37	22.55	1268	604314141	EYU27028.1	1335	1.5e-144	hypothetical protein MIMGU_mgv1a010102mg [Erythranthe guttata]	XM_011089708.2	XM_011089708	469	0	PREDICTED: Sesamum indicum tetraketide alpha-pyrone reductase 1 (LOC105169324), mRNA	-	-	-	http://www.genome.jp/dbget-bin/www_bget?ko:-	Q9S9N9	709	2.1e-73	Cinnamoyl-CoA reductase 1 OS=Arabidopsis thaliana OX=3702 GN=CCR1 PE=1 SV=1	PF01370//PF01073	NAD dependent epimerase/dehydratase family//3-beta hydroxysteroid dehydrogenase/isomerase family	GO:0055114//GO:0008207//GO:0008210//GO:0006694//GO:0008209	oxidation-reduction process//C21-steroid hormone metabolic process//estrogen metabolic process//steroid biosynthetic process//androgen metabolic process	GO:0003854//GO:0016616//GO:0003824//GO:0050662	3-beta-hydroxy-delta5-steroid dehydrogenase activity//oxidoreductase activity, acting on the CH-OH group of donors, NAD or NADP as acceptor//catalytic activity//obsolete coenzyme binding	--	--	--	--	FALSE	1.49488	0.0140843	DOWN	-3.64642	3.28e-12	DOWN	-2.26226	3.78e-06	UP	1.94155	0.000533729	DOWN	-1.75447	0.000444343
Cluster-11149.36491	4.14	2.49	1.7	4.6	5.02	1417	747090189	XP_011092773.1	938	1.8e-98	probable NAD(P)H dehydrogenase (quinone) FQR1-like 1 isoform X1 [Sesamum indicum]	XM_011094471.2	XM_011094471	319	7.67e-164	PREDICTED: Sesamum indicum probable NAD(P)H dehydrogenase (quinone) FQR1-like 2 (LOC105172872), transcript variant X1, mRNA	K03809	wrbA	NAD(P)H dehydrogenase (quinone)	http://www.genome.jp/dbget-bin/www_bget?ko:K03809	O23207	767	4.5e-80	Probable NAD(P)H dehydrogenase (quinone) FQR1-like 2 OS=Arabidopsis thaliana OX=3702 GN=At4g36750 PE=1 SV=1	PF00258//PF03358	Flavodoxin//NADPH-dependent FMN reductase	--	--	GO:0010181//GO:0016491	FMN binding//oxidoreductase activity	--	--	KOG3135	1,4-benzoquinone reductase-like; Trp repressor binding protein-like/protoplast-secreted protein	FALSE	-0.679448	0.414829	FALSE	-0.522932	0.539178	FALSE	-1.31281	0.0193947	FALSE	0.522959	0.557126	FALSE	-0.049895	1
Cluster-11149.28647	33.5	61.46	50.69	134.84	153.31	1988	747076949	XP_011085569.1	2340	6.6e-261	6-phosphogluconate dehydrogenase, decarboxylating 3 [Sesamum indicum]	XM_011100772.2	XM_011100772	977	0	PREDICTED: Sesamum indicum 6-phosphogluconate dehydrogenase, decarboxylating 3 (LOC105177569), transcript variant X2, mRNA	K00033	PGD, gnd, gntZ	6-phosphogluconate dehydrogenase [EC:1.1.1.44 1.1.1.343]	http://www.genome.jp/dbget-bin/www_bget?ko:K00033	Q9FWA3	2181	6.9e-244	6-phosphogluconate dehydrogenase, decarboxylating 2 OS=Arabidopsis thaliana OX=3702 GN=PGD2 PE=1 SV=1	PF03446//PF02737//PF00393	NAD binding domain of 6-phosphogluconate dehydrogenase//3-hydroxyacyl-CoA dehydrogenase, NAD binding domain//6-phosphogluconate dehydrogenase, C-terminal domain	GO:0006554//GO:0006574//GO:0019521//GO:0006098//GO:0055114//GO:0006631//GO:0018874//GO:0006633//GO:0006568//GO:0006552//GO:0006550	lysine catabolic process//valine catabolic process//D-gluconate metabolic process//pentose-phosphate shunt//oxidation-reduction process//fatty acid metabolic process//benzoate metabolic process//fatty acid biosynthetic process//tryptophan metabolic process//leucine catabolic process//isoleucine catabolic process	GO:0004616//GO:0016491//GO:0003857//GO:0050661	phosphogluconate dehydrogenase (decarboxylating) activity//oxidoreductase activity//3-hydroxyacyl-CoA dehydrogenase activity//NADP binding	--	--	KOG2653	6-phosphogluconate dehydrogenase	FALSE	-0.931525	0.109936	FALSE	-0.58167	0.385718	DOWN	-1.62397	0.000638115	FALSE	-1.33427	0.00982302	DOWN	-1.96593	3.14e-05
Cluster-11149.1785	0.12	0.22	0.16	0.81	0.49	1660	1276251383	PIN10074.1	2219	5.9e-247	Ferric reductase, NADH/NADPH oxidase [Handroanthus impetiginosus]	XM_012983206.1	XM_012983206	664	0	PREDICTED: Erythranthe guttatus putative respiratory burst oxidase homolog protein H (LOC105959160), mRNA	-	-	-	http://www.genome.jp/dbget-bin/www_bget?ko:-	Q9FJD6	1477	2.5e-162	Putative respiratory burst oxidase homolog protein H OS=Arabidopsis thaliana OX=3702 GN=RBOHH PE=3 SV=1	PF13405//PF13202//PF08414//PF01292//PF00036//PF13499	EF-hand domain//EF hand//Respiratory burst NADPH oxidase//Prokaryotic cytochrome b561//EF hand//EF-hand domain pair	GO:0055114//GO:0006804//GO:0006118//GO:0006979	oxidation-reduction process//obsolete peroxidase reaction//obsolete electron transport//response to oxidative stress	GO:0050664//GO:0005509//GO:0004601//GO:0009055	oxidoreductase activity, acting on NAD(P)H, oxygen as acceptor//calcium ion binding//peroxidase activity//electron transfer activity	GO:0016021	integral component of membrane	--	--	FALSE	-1.66767	0.116085	FALSE	0.328282	0.994314	FALSE	-1.44644	0.174559	FALSE	-2.04955	0.0863877	FALSE	-1.7661	0.113399
Cluster-14529.0	0.11	0.17	0.55	1.02	1.74	1042	1279033835	XP_022856057.1	1150	3.4e-123	alcohol dehydrogenase-like 3 [Olea europaea var. sylvestris]	--	--	--	--	--	K00001	E1.1.1.1, adh	alcohol dehydrogenase	http://www.genome.jp/dbget-bin/www_bget?ko:K00001	A1L4Y2	987	1e-105	Alcohol dehydrogenase-like 3 OS=Arabidopsis thaliana OX=3702 GN=At1g32780 PE=2 SV=1	PF02826//PF02254//PF08240//PF00107//PF01728//PF03721	D-isomer specific 2-hydroxyacid dehydrogenase, NAD binding domain//TrkA-N domain//Alcohol dehydrogenase GroES-like domain//Zinc-binding dehydrogenase//FtsJ-like methyltransferase//UDP-glucose/GDP-mannose dehydrogenase family, NAD binding domain	GO:0055114//GO:0006813//GO:0032259	oxidation-reduction process//potassium ion transport//methylation	GO:0016616//GO:0008168//GO:0051287	oxidoreductase activity, acting on the CH-OH group of donors, NAD or NADP as acceptor//methyltransferase activity//NAD binding	--	--	KOG0022	Alcohol dehydrogenase, class III	FALSE	-2.35575	0.0412473	FALSE	-1.17203	0.175834	DOWN	-3.62871	3.79e-05	FALSE	-2.51257	0.093371	DOWN	-3.7213	0.000193417
Cluster-11149.41840	1.01	0.89	0.92	3.95	2.92	1840	--	--	--	--	--	MN223722.1	MN223722	37	5.8e-07	Utricularia amethystina voucher CM131 chloroplast, complete genome	--	--	--	--	--	--	--	--	PF00984	UDP-glucose/GDP-mannose dehydrogenase family, central domain	GO:0055114	oxidation-reduction process	GO:0016616//GO:0051287	oxidoreductase activity, acting on the CH-OH group of donors, NAD or NADP as acceptor//NAD binding	--	--	--	--	DOWN	-1.95147	0.00125736	FALSE	0.0395942	1	DOWN	-2.02177	0.000456967	FALSE	-1.2898	0.0444283	FALSE	-1.29972	0.0306174
Cluster-11149.23362	2.34	6.79	4.45	16.59	14.85	2344	747055635	XP_011074061.1	1271	7.1e-137	short-chain dehydrogenase/reductase family 42E member 1 [Sesamum indicum]	XM_011075759.2	XM_011075759	481	0	PREDICTED: Sesamum indicum short-chain dehydrogenase/reductase family 42E member 1 (LOC105158864), mRNA	-	-	-	http://www.genome.jp/dbget-bin/www_bget?ko:-	Q4R7R1	575	1.4e-57	Short-chain dehydrogenase/reductase family 42E member 1 OS=Macaca fascicularis OX=9541 GN=SDR42E1 PE=2 SV=1	PF01073//PF08471//PF01370//PF02254//PF03435//PF01728	3-beta hydroxysteroid dehydrogenase/isomerase family//Class II vitamin B12-dependent ribonucleotide reductase//NAD dependent epimerase/dehydratase family//TrkA-N domain//Saccharopine dehydrogenase NADP binding domain//FtsJ-like methyltransferase	GO:0008210//GO:0006694//GO:0032259//GO:0006206//GO:0008207//GO:0055114//GO:0006813//GO:0006144//GO:0009186//GO:0008209	estrogen metabolic process//steroid biosynthetic process//methylation//pyrimidine nucleobase metabolic process//C21-steroid hormone metabolic process//oxidation-reduction process//potassium ion transport//purine nucleobase metabolic process//deoxyribonucleoside diphosphate metabolic process//androgen metabolic process	GO:0003854//GO:0016491//GO:0016616//GO:0003824//GO:0050897//GO:0008168//GO:0004748//GO:0050662	3-beta-hydroxy-delta5-steroid dehydrogenase activity//oxidoreductase activity//oxidoreductase activity, acting on the CH-OH group of donors, NAD or NADP as acceptor//catalytic activity//cobalt ion binding//methyltransferase activity//ribonucleoside-diphosphate reductase activity, thioredoxin disulfide as acceptor//obsolete coenzyme binding	GO:0005971	ribonucleoside-diphosphate reductase complex	KOG1430	C-3 sterol dehydrogenase/3-beta-hydroxysteroid dehydrogenase and related dehydrogenases	FALSE	-1.08693	0.0581926	FALSE	-0.235962	0.864447	DOWN	-1.4336	0.00373694	DOWN	-2.14831	2.23e-05	DOWN	-2.43407	7.55e-07
Cluster-11149.46293	0.69	0.5	0.4	2.04	1.38	687	--	--	--	--	--	XM_012978318.1	XM_012978318	80	2.62e-31	PREDICTED: Erythranthe guttatus D-3-phosphoglycerate dehydrogenase 3, chloroplastic-like (LOC105954617), mRNA	--	--	--	--	--	--	--	--	PF00389	D-isomer specific 2-hydroxyacid dehydrogenase, catalytic domain	GO:0055114	oxidation-reduction process	GO:0016616//GO:0051287	oxidoreductase activity, acting on the CH-OH group of donors, NAD or NADP as acceptor//NAD binding	--	--	--	--	FALSE	-1.78341	0.171232	FALSE	0.159166	1	FALSE	-1.72965	0.11028	FALSE	-0.896539	0.557126	FALSE	-0.785358	0.701706
Cluster-11149.44608	0.1	0.3	0.2	0.68	0.69	690	1276265450	PIN21711.1	749	7e-77	Glucan endo-1,3-beta-D-glucosidase [Handroanthus impetiginosus]	--	--	--	--	--	-	-	-	http://www.genome.jp/dbget-bin/www_bget?ko:-	Q02439	529	8.7e-53	Putative glucan endo-1,3-beta-glucosidase GVI (Fragment) OS=Hordeum vulgare OX=4513 PE=3 SV=1	PF08414//PF00332	Respiratory burst NADPH oxidase//Glycosyl hydrolases family 17	GO:0006804//GO:0055114//GO:0005975//GO:0006979	obsolete peroxidase reaction//oxidation-reduction process//carbohydrate metabolic process//response to oxidative stress	GO:0050664//GO:0004601//GO:0004553	oxidoreductase activity, acting on NAD(P)H, oxygen as acceptor//peroxidase activity//hydrolase activity, hydrolyzing O-glycosyl compounds	--	--	--	--	FALSE	-0.932704	0.869797	FALSE	-0.417252	1	FALSE	-1.45278	0.453271	FALSE	-2.02706	0.378347	FALSE	-2.47152	0.202157
Cluster-11149.43881	2.18	3.94	7.11	29.05	24.83	1939	1600670021	TEY52301.1	2040	4e-226	fatty acyl-CoA reductase [Salvia splendens]	XM_011092057.2	XM_011092057	871	0	PREDICTED: Sesamum indicum alcohol-forming fatty acyl-CoA reductase (LOC105171053), mRNA	-	-	-	http://www.genome.jp/dbget-bin/www_bget?ko:-	Q9XGY7	1650	2.5e-182	Alcohol-forming fatty acyl-CoA reductase OS=Simmondsia chinensis OX=3999 PE=1 SV=1	PF01370//PF01073//PF03435	NAD dependent epimerase/dehydratase family//3-beta hydroxysteroid dehydrogenase/isomerase family//Saccharopine dehydrogenase NADP binding domain	GO:0008207//GO:0055114//GO:0006694//GO:0008210//GO:0008209	C21-steroid hormone metabolic process//oxidation-reduction process//steroid biosynthetic process//estrogen metabolic process//androgen metabolic process	GO:0003854//GO:0016491//GO:0016616//GO:0003824//GO:0050662	3-beta-hydroxy-delta5-steroid dehydrogenase activity//oxidoreductase activity//oxidoreductase activity, acting on the CH-OH group of donors, NAD or NADP as acceptor//catalytic activity//obsolete coenzyme binding	--	--	KOG1221	Acyl-CoA reductase	DOWN	-2.6804	6.42e-08	FALSE	-0.170251	0.951219	DOWN	-2.96124	1.14e-09	DOWN	-3.06	1.29e-09	DOWN	-3.27996	4.7e-11
Cluster-11149.16566	21.54	36.91	23.73	45.62	88.99	1197	1600645146	TEY29000.1	679	1.6e-68	NAD(P)H dehydrogenase (quinone) [Salvia splendens]	XM_031643235.1	XM_031643235	212	1.95e-104	PREDICTED: Nymphaea colorata probable NAD(P)H dehydrogenase (quinone) FQR1-like 1 (LOC116263505), mRNA	K03809	wrbA	NAD(P)H dehydrogenase (quinone)	http://www.genome.jp/dbget-bin/www_bget?ko:K03809	Q6NQE2	633	1.3e-64	Probable NAD(P)H dehydrogenase (quinone) FQR1-like 1 OS=Arabidopsis thaliana OX=3702 GN=At4g27270 PE=1 SV=1	PF00258//PF03358	Flavodoxin//NADPH-dependent FMN reductase	--	--	GO:0010181//GO:0016491	FMN binding//oxidoreductase activity	--	--	KOG3135	1,4-benzoquinone reductase-like; Trp repressor binding protein-like/protoplast-secreted protein	FALSE	-0.1	1	FALSE	-1.36102	0.00870726	DOWN	-1.57204	0.00106671	FALSE	-0.410932	0.658478	DOWN	-1.82191	0.000147415
Cluster-11149.44846	0.16	0.62	0.28	0.49	1.06	1025	1600680066	TEY62143.1	160	2.1e-08	2-oxoglutarate dehydrogenase E1 component [Salvia splendens]	CP025662.1	CP025662	55	3.14e-17	Ipomoea triloba cultivar NCNSP0323 chromosome 3	K00164	OGDH, sucA	2-oxoglutarate dehydrogenase E1 component	http://www.genome.jp/dbget-bin/www_bget?ko:K00164	--	--	--	--	PF01118	Semialdehyde dehydrogenase, NAD binding domain	GO:0055114	oxidation-reduction process	GO:0016620//GO:0051287	oxidoreductase activity, acting on the aldehyde or oxo group of donors, NAD or NADP as acceptor//NAD binding	--	--	--	--	FALSE	0.546538	0.90417	FALSE	-1.48795	0.128893	FALSE	-1.05077	0.29498	FALSE	-0.884647	0.892507	FALSE	-2.41366	0.0245024
Cluster-11149.23381	2.1	2.54	2.42	3.77	9.18	2175	848883203	XP_012841905.1	328	1.5e-27	PREDICTED: isocitrate dehydrogenase [NADP] [Erythranthe guttata]	XM_020695983.1	XM_020695983	148	1.36e-68	PREDICTED: Sesamum indicum isocitrate dehydrogenase [NADP] (LOC105168086), transcript variant X2, mRNA	K00031	IDH1, IDH2, icd	isocitrate dehydrogenase	http://www.genome.jp/dbget-bin/www_bget?ko:K00031	Q40345	310	6.8e-27	Isocitrate dehydrogenase [NADP], chloroplastic (Fragment) OS=Medicago sativa OX=3879 PE=2 SV=1	PF00180	Isocitrate/isopropylmalate dehydrogenase	GO:0055114	oxidation-reduction process	GO:0016616	oxidoreductase activity, acting on the CH-OH group of donors, NAD or NADP as acceptor	--	--	KOG1526	NADP-dependent isocitrate dehydrogenase	FALSE	-0.36893	0.786733	DOWN	-1.6792	0.00131622	DOWN	-2.15869	1.47e-05	FALSE	-0.171534	1	DOWN	-1.90045	0.000184093
Cluster-11149.24521	42.9	25.22	14.92	58.57	58.65	3330	1150196151	AQT38168.1	2200	1.9e-244	NADPH-cytochrome P450 reductase [Andrographis paniculata]	XM_012983407.1	XM_012983407	960	0	PREDICTED: Erythranthe guttatus NADPH--cytochrome P450 reductase (LOC105959330), mRNA	K00327	POR	NADPH-ferrihemoprotein reductase	http://www.genome.jp/dbget-bin/www_bget?ko:K00327	P37116	1856	5.6e-206	NADPH--cytochrome P450 reductase OS=Vigna radiata var. radiata OX=3916 PE=1 SV=1	PF15141//PF00258//PF00667//PF00175	Ubiquinol-cytochrome-c reductase complex assembly factor 3//Flavodoxin//FAD binding domain//oxidoreductase NAD-binding domain	GO:0034551//GO:0055114	mitochondrial respiratory chain complex III assembly//oxidation-reduction process	GO:0010181//GO:0016491	FMN binding//oxidoreductase activity	--	--	KOG1158	NADP/FAD dependent oxidoreductase	FALSE	-1.01548	0.0747109	FALSE	-0.397881	0.634638	DOWN	-1.52413	0.00146759	FALSE	0.226704	0.888246	FALSE	-0.221183	0.804566
Cluster-18706.0	0.06	0.47	0.23	0.84	0.97	1005	1276251383	PIN10074.1	1029	3.5e-109	Ferric reductase, NADH/NADPH oxidase [Handroanthus impetiginosus]	XM_011091545.2	XM_011091545	393	0	PREDICTED: Sesamum indicum putative respiratory burst oxidase homolog protein H (LOC105170676), mRNA	-	-	-	http://www.genome.jp/dbget-bin/www_bget?ko:-	Q9FJD6	776	2.9e-81	Putative respiratory burst oxidase homolog protein H OS=Arabidopsis thaliana OX=3702 GN=RBOHH PE=3 SV=1	PF08030	Ferric reductase NAD binding domain	GO:0055114	oxidation-reduction process	GO:0016491	oxidoreductase activity	--	--	--	--	FALSE	-0.635698	0.835728	FALSE	-0.600536	0.72813	FALSE	-1.34412	0.208489	FALSE	-3.10995	0.108574	FALSE	-3.73562	0.00614922
Cluster-11149.39749	4.51	5.23	2.77	5.81	11.85	4957	747092300	XP_011093905.1	1771	1.6e-194	alpha-aminoadipic semialdehyde synthase [Sesamum indicum]	XM_011095603.2	XM_011095603	731	0	PREDICTED: Sesamum indicum alpha-aminoadipic semialdehyde synthase (LOC105173734), transcript variant X2, mRNA	K14157	AASS	alpha-aminoadipic semialdehyde synthase [EC:1.5.1.8 1.5.1.9]	http://www.genome.jp/dbget-bin/www_bget?ko:K14157	Q9SMZ4	1300	2.5e-141	Alpha-aminoadipic semialdehyde synthase OS=Arabidopsis thaliana OX=3702 GN=LKR/SDH PE=1 SV=1	PF03435//PF14980//PF05669	Saccharopine dehydrogenase NADP binding domain//TIP39 peptide//SOH1	GO:0006355//GO:0055114//GO:0007218	regulation of transcription, DNA-templated//oxidation-reduction process//neuropeptide signaling pathway	GO:0016491//GO:0003712	oxidoreductase activity//transcription coregulator activity	GO:0005576//GO:0016592//GO:0005667	extracellular region//mediator complex//transcription regulator complex	KOG0172	Lysine-ketoglutarate reductase/saccharopine dehydrogenase	FALSE	0.046309	1	FALSE	-1.42223	0.00601046	DOWN	-1.48667	0.00222703	FALSE	0.30928	0.806498	FALSE	-1.16291	0.0218507
Cluster-16168.2	0.43	0.88	0.44	0.93	1.95	1245	747047273	XP_011069596.1	820	7.5e-85	uncharacterized protein LOC105155420 [Sesamum indicum]	XM_011102549.2	XM_011102549	332	3.98e-171	PREDICTED: Sesamum indicum uncharacterized LOC105178962 (LOC105178962), mRNA	-	-	-	http://www.genome.jp/dbget-bin/www_bget?ko:-	--	--	--	--	PF02800//PF00435	Glyceraldehyde 3-phosphate dehydrogenase, C-terminal domain//Spectrin repeat	GO:0055114	oxidation-reduction process	GO:0016620//GO:0005515	oxidoreductase activity, acting on the aldehyde or oxo group of donors, NAD or NADP as acceptor//protein binding	--	--	--	--	FALSE	0.125661	1	FALSE	-1.45112	0.0564147	FALSE	-1.43524	0.0401769	FALSE	-0.454477	0.877635	FALSE	-1.95292	0.0105382
Cluster-11149.42697	0.75	1.74	0.48	0.49	2.25	422	388508916	AFK42524.1	217	2.1e-15	unknown [Lotus japonicus]	XM_023011074.1	XM_023011074	85	2.59e-34	PREDICTED: Olea europaea var. sylvestris ferredoxin--NADP reductase, root-type isozyme, chloroplastic-like (LOC111386604), mRNA	K02641	petH	ferredoxin--NADP+ reductase	http://www.genome.jp/dbget-bin/www_bget?ko:K02641	Q41014	213	2.3e-16	Ferredoxin--NADP reductase, root isozyme, chloroplastic OS=Pisum sativum OX=3888 PE=2 SV=2	PF00175	oxidoreductase NAD-binding domain	GO:0055114	oxidation-reduction process	GO:0016491	oxidoreductase activity	--	--	--	--	FALSE	1.99931	0.386452	FALSE	-2.51177	0.202516	FALSE	-0.624229	0.71112	FALSE	1.20279	0.745764	FALSE	-1.34683	0.461357
Cluster-11149.22115	1.1	0.77	1.34	4.01	6.39	1335	1276253582	PIN11796.1	1272	3.1e-137	Flavonol reductase/cinnamoyl-CoA reductase [Handroanthus impetiginosus]	XM_011092356.2	XM_011092356	362	0	PREDICTED: Sesamum indicum vestitone reductase (LOC105171290), transcript variant X3, mRNA	-	-	-	http://www.genome.jp/dbget-bin/www_bget?ko:-	Q40316	883	1.5e-93	Vestitone reductase OS=Medicago sativa OX=3879 PE=1 SV=1	PF14560//PF01370//PF01073	Ubiquitin-like domain//NAD dependent epimerase/dehydratase family//3-beta hydroxysteroid dehydrogenase/isomerase family	GO:0008207//GO:0055114//GO:0006694//GO:0008210//GO:0008209	C21-steroid hormone metabolic process//oxidation-reduction process//steroid biosynthetic process//estrogen metabolic process//androgen metabolic process	GO:0003854//GO:0016616//GO:0003824//GO:0050662//GO:0005515	3-beta-hydroxy-delta5-steroid dehydrogenase activity//oxidoreductase activity, acting on the CH-OH group of donors, NAD or NADP as acceptor//catalytic activity//obsolete coenzyme binding//protein binding	--	--	--	--	DOWN	-2.16797	0.000635477	FALSE	-1.06739	0.0794322	DOWN	-3.34455	7.61e-09	FALSE	-1.19707	0.0929936	DOWN	-2.31353	3.79e-05
Cluster-11149.47207	0.77	0	0.2	0.29	0.97	693	--	--	--	--	--	XM_011090392.2	XM_011090392	69	3.44e-25	PREDICTED: Sesamum indicum isocitrate dehydrogenase [NAD] regulatory subunit 1, mitochondrial-like (LOC105169847), mRNA	--	--	--	--	--	--	--	--	PF00180//PF01708	Isocitrate/isopropylmalate dehydrogenase//Geminivirus putative movement protein	GO:0046740//GO:0055114	transport of virus in host, cell to cell//oxidation-reduction process	GO:0016616	oxidoreductase activity, acting on the CH-OH group of donors, NAD or NADP as acceptor	GO:0016021	integral component of membrane	--	--	FALSE	-4.52318	0.566119	FALSE	-2.10963	0.144338	FALSE	-6.48032	0.00923724	FALSE	2.03938	0.209619	FALSE	-0.115687	1
Cluster-11149.40777	0.3	0.35	0.29	2.5	1.45	2243	604302180	EYU21766.1	576	2.6e-56	hypothetical protein MIMGU_mgv1a010388mg [Erythranthe guttata]	XM_011074981.2	XM_011074981	271	5.91e-137	PREDICTED: Sesamum indicum carbonyl reductase [NADPH] 1 (LOC105158283), mRNA	-	-	-	http://www.genome.jp/dbget-bin/www_bget?ko:-	Q3SZD7	217	4.3e-16	Carbonyl reductase [NADPH] 1 OS=Bos taurus OX=9913 GN=CBR1 PE=2 SV=1	PF01370//PF05837//PF02737	NAD dependent epimerase/dehydratase family//Centromere protein H (CENP-H)//3-hydroxyacyl-CoA dehydrogenase, NAD binding domain	GO:0006554//GO:0006574//GO:0055114//GO:0006631//GO:0018874//GO:0006633//GO:0006550//GO:0006552//GO:0006568//GO:0051382	lysine catabolic process//valine catabolic process//oxidation-reduction process//fatty acid metabolic process//benzoate metabolic process//fatty acid biosynthetic process//isoleucine catabolic process//leucine catabolic process//tryptophan metabolic process//kinetochore assembly	GO:0016491//GO:0003824//GO:0003857//GO:0050662	oxidoreductase activity//catalytic activity//3-hydroxyacyl-CoA dehydrogenase activity//obsolete coenzyme binding	GO:0000776	kinetochore	KOG1208	Dehydrogenases with different specificities (related to short-chain alcohol dehydrogenases)	DOWN	-2.61019	3.69e-05	FALSE	0.39136	0.737054	DOWN	-2.32777	0.00026218	DOWN	-2.38801	0.000293348	DOWN	-2.04507	0.00204863
Cluster-11149.28364	132.42	118.4	62.43	350.57	316.7	1897	747077606	XP_011085932.1	2082	5.2e-231	isocitrate dehydrogenase [NADP] [Sesamum indicum]	XM_011087630.2	XM_011087630	952	0	PREDICTED: Sesamum indicum isocitrate dehydrogenase [NADP] (LOC105167815), mRNA	K00031	IDH1, IDH2, icd	isocitrate dehydrogenase	http://www.genome.jp/dbget-bin/www_bget?ko:K00031	Q40345	1983	6e-221	Isocitrate dehydrogenase [NADP], chloroplastic (Fragment) OS=Medicago sativa OX=3879 PE=2 SV=1	PF00180	Isocitrate/isopropylmalate dehydrogenase	GO:0055114	oxidation-reduction process	GO:0016616	oxidoreductase activity, acting on the CH-OH group of donors, NAD or NADP as acceptor	--	--	KOG1526	NADP-dependent isocitrate dehydrogenase	FALSE	-1.36378	0.00877356	FALSE	-0.249925	0.830424	DOWN	-1.72448	0.000263496	FALSE	-0.730262	0.237876	FALSE	-1.03019	0.0403467
Cluster-11149.8736	7.52	10.33	4.39	19.03	23.22	1435	604335046	EYU39024.1	1394	2.4e-151	hypothetical protein MIMGU_mgv1a022933mg [Erythranthe guttata]	XM_030664292.1	XM_030664292	52	2.06e-15	PREDICTED: Rhodamnia argentea glyoxylate/hydroxypyruvate reductase HPR3-like (LOC115733663), partial mRNA	-	-	-	http://www.genome.jp/dbget-bin/www_bget?ko:-	Q9LE33	868	8.9e-92	Glyoxylate/hydroxypyruvate reductase HPR3 OS=Arabidopsis thaliana OX=3702 GN=HPR3 PE=2 SV=1	PF02826//PF00899//PF03446//PF00389	D-isomer specific 2-hydroxyacid dehydrogenase, NAD binding domain//ThiF family//NAD binding domain of 6-phosphogluconate dehydrogenase//D-isomer specific 2-hydroxyacid dehydrogenase, catalytic domain	GO:0055114	oxidation-reduction process	GO:0050661//GO:0051287//GO:0016616//GO:0008641	NADP binding//NAD binding//oxidoreductase activity, acting on the CH-OH group of donors, NAD or NADP as acceptor//ubiquitin-like modifier activating enzyme activity	--	--	KOG0069	Glyoxylate/hydroxypyruvate reductase (D-isomer-specific 2-hydroxy acid dehydrogenase superfamily)	FALSE	-0.677624	0.338659	FALSE	-0.683478	0.303473	DOWN	-1.4718	0.00301664	FALSE	-0.666921	0.338055	FALSE	-1.4003	0.00560351
Cluster-11149.35308	9.24	0.99	1.29	3.81	7.3	1990	1276252118	PIN10645.1	1172	1.8e-125	NADH-dehydrogenase (ubiquinone) [Handroanthus impetiginosus]	XM_011090661.2	XM_011090661	398	0	PREDICTED: Sesamum indicum apoptosis-inducing factor homolog B (LOC105170064), mRNA	-	-	-	http://www.genome.jp/dbget-bin/www_bget?ko:-	Q54NS8	339	2.7e-30	Apoptosis-inducing factor homolog B OS=Dictyostelium discoideum OX=44689 GN=aifB PE=3 SV=1	PF02254//PF01494//PF07992//PF01210//PF01266//PF03435	TrkA-N domain//FAD binding domain//Pyridine nucleotide-disulphide oxidoreductase//NAD-dependent glycerol-3-phosphate dehydrogenase N-terminus//FAD dependent oxidoreductase//Saccharopine dehydrogenase NADP binding domain	GO:0046168//GO:0055114//GO:0006813	glycerol-3-phosphate catabolic process//oxidation-reduction process//potassium ion transport	GO:0016491//GO:0071949//GO:0051287//GO:0016616	oxidoreductase activity//FAD binding//NAD binding//oxidoreductase activity, acting on the CH-OH group of donors, NAD or NADP as acceptor	--	--	--	--	DOWN	-1.74237	0.00335272	FALSE	-1.33459	0.0156214	DOWN	-3.18698	1.67e-09	UP	1.95347	0.000142614	FALSE	0.568917	0.352113
Cluster-11149.16294	5.18	9.77	6.67	52.16	40.47	2889	747101389	XP_011098824.1	801	2.8e-82	glucose-6-phosphate 1-dehydrogenase, cytoplasmic isoform [Sesamum indicum]	XM_011100522.2	XM_011100522	377	0	PREDICTED: Sesamum indicum glucose-6-phosphate 1-dehydrogenase, cytoplasmic isoform (LOC105177387), transcript variant X2, mRNA	K00036	G6PD, zwf	glucose-6-phosphate 1-dehydrogenase [EC:1.1.1.49 1.1.1.363]	http://www.genome.jp/dbget-bin/www_bget?ko:K00036	P37830	664	8.1e-68	Glucose-6-phosphate 1-dehydrogenase, cytoplasmic isoform OS=Solanum tuberosum OX=4113 GN=G6PDH PE=2 SV=1	PF00479//PF02781	Glucose-6-phosphate dehydrogenase, NAD binding domain//Glucose-6-phosphate dehydrogenase, C-terminal domain	GO:0006006//GO:0006749//GO:0006098//GO:0055114	glucose metabolic process//glutathione metabolic process//pentose-phosphate shunt//oxidation-reduction process	GO:0050661//GO:0016614//GO:0004345	NADP binding//oxidoreductase activity, acting on CH-OH group of donors//glucose-6-phosphate dehydrogenase activity	--	--	KOG0563	Glucose-6-phosphate 1-dehydrogenase	DOWN	-2.21656	5.32e-06	FALSE	-0.0299172	1	DOWN	-2.35721	5.76e-07	DOWN	-2.65684	4.38e-08	DOWN	-2.73669	9.71e-09
Cluster-11149.2107	0.55	2.36	0.39	1.44	2.7	1479	1276264601	PIN20992.1	2007	2e-222	Flavin-containing monooxygenase [Handroanthus impetiginosus]	XM_011081838.2	XM_011081838	700	0	PREDICTED: Sesamum indicum probable indole-3-pyruvate monooxygenase YUCCA5 (LOC105163480), mRNA	K11816	YUCCA	indole-3-pyruvate monooxygenase	http://www.genome.jp/dbget-bin/www_bget?ko:K11816	Q9SVU0	1619	7.5e-179	Probable indole-3-pyruvate monooxygenase YUCCA8 OS=Arabidopsis thaliana OX=3702 GN=YUC8 PE=2 SV=1	PF01494//PF02254//PF07992//PF01266//PF00743	FAD binding domain//TrkA-N domain//Pyridine nucleotide-disulphide oxidoreductase//FAD dependent oxidoreductase//Flavin-binding monooxygenase-like	GO:0006813//GO:0055114	potassium ion transport//oxidation-reduction process	GO:0050660//GO:0050661//GO:0016491//GO:0071949//GO:0004499	flavin adenine dinucleotide binding//NADP binding//oxidoreductase activity//FAD binding//N,N-dimethylaniline monooxygenase activity	--	--	--	--	FALSE	0.91379	0.245291	FALSE	-1.2962	0.0505185	FALSE	-0.49305	0.523909	FALSE	-0.709669	0.61438	DOWN	-2.05423	0.00132284
Cluster-11149.37886	90.67	11.92	59.82	390.86	432.76	1698	1276241398	PIN02605.1	2084	2.7e-231	UDP-glucose 4-epimerase/UDP-sulfoquinovose synthase [Handroanthus impetiginosus]	XM_012985621.1	XM_012985621	789	0	PREDICTED: Erythranthe guttatus UDP-glucuronate 4-epimerase 1 (LOC105961398), mRNA	K08679	E5.1.3.6	UDP-glucuronate 4-epimerase	http://www.genome.jp/dbget-bin/www_bget?ko:K08679	Q9M0B6	1840	2e-204	UDP-glucuronate 4-epimerase 1 OS=Arabidopsis thaliana OX=3702 GN=GAE1 PE=1 SV=1	PF01370//PF01073	NAD dependent epimerase/dehydratase family//3-beta hydroxysteroid dehydrogenase/isomerase family	GO:0008209//GO:0008210//GO:0006694//GO:0008207//GO:0055114	androgen metabolic process//estrogen metabolic process//steroid biosynthetic process//C21-steroid hormone metabolic process//oxidation-reduction process	GO:0050662//GO:0003824//GO:0016616//GO:0003854	obsolete coenzyme binding//catalytic activity//oxidoreductase activity, acting on the CH-OH group of donors, NAD or NADP as acceptor//3-beta-hydroxy-delta5-steroid dehydrogenase activity	--	--	KOG1371	UDP-glucose 4-epimerase/UDP-sulfoquinovose synthase	DOWN	-4.83206	2.31e-21	FALSE	-0.543566	0.439329	DOWN	-5.48632	4.32e-26	DOWN	-1.43418	0.00480969	DOWN	-2.02775	1.65e-05
Cluster-11149.18846	36.77	3.34	13.24	61.5	98.12	3498	1276259756	PIN16899.1	1630	2.5e-178	Glutamyl-tRNA reductase [Handroanthus impetiginosus]	XM_011089702.2	XM_011089702	739	0	PREDICTED: Sesamum indicum glutamyl-tRNA reductase 1, chloroplastic (LOC105169321), mRNA	K02492	hemA	glutamyl-tRNA reductase	http://www.genome.jp/dbget-bin/www_bget?ko:K02492	P93111	1392	3.7e-152	Glutamyl-tRNA reductase 1, chloroplastic OS=Cucumis sativus OX=3659 GN=HEMA1 PE=2 SV=1	PF00745//PF02737//PF03435//PF00107//PF03721//PF01113//PF00009//PF02254//PF00044//PF02826//PF00899//PF03446	Glutamyl-tRNAGlu reductase, dimerisation domain//3-hydroxyacyl-CoA dehydrogenase, NAD binding domain//Saccharopine dehydrogenase NADP binding domain//Zinc-binding dehydrogenase//UDP-glucose/GDP-mannose dehydrogenase family, NAD binding domain//Dihydrodipicolinate reductase, N-terminus//Elongation factor Tu GTP binding domain//TrkA-N domain//Glyceraldehyde 3-phosphate dehydrogenase, NAD binding do…	GO:0006568//GO:0006552//GO:0006550//GO:0006633//GO:0033014//GO:0006813//GO:0055114//GO:0006554//GO:0009089//GO:0018874//GO:0006631//GO:0006574//GO:0009085	tryptophan metabolic process//leucine catabolic process//isoleucine catabolic process//fatty acid biosynthetic process//tetrapyrrole biosynthetic process//potassium ion transport//oxidation-reduction process//lysine catabolic process//lysine biosynthetic process via diaminopimelate//benzoate metabolic process//fatty acid metabolic process//valine catabolic process//lysine biosynthetic process	GO:0008641//GO:0005525//GO:0016620//GO:0051287//GO:0003924//GO:0008883//GO:0050661//GO:0003857//GO:0008839//GO:0016616//GO:0016491	ubiquitin-like modifier activating enzyme activity//GTP binding//oxidoreductase activity, acting on the aldehyde or oxo group of donors, NAD or NADP as acceptor//NAD binding//GTPase activity//glutamyl-tRNA reductase activity//NADP binding//3-hydroxyacyl-CoA dehydrogenase activity//4-hydroxy-tetrahydrodipicolinate reductase//oxidoreductase activity, acting on the CH-OH group of donors, NAD or NADP…	--	--	--	--	DOWN	-4.00426	8.65e-16	FALSE	-1.06974	0.0485805	DOWN	-5.18465	7.25e-24	FALSE	-0.0659497	1	FALSE	-1.18569	0.0168109
Cluster-11149.4747	3.7	1.58	0.38	0.8	2.82	355	848851246	XP_012835526.1	453	7.6e-43	PREDICTED: LOW QUALITY PROTEIN: uncharacterized protein LOC105956226 [Erythranthe guttata]	XM_012980072.1	XM_012980072	164	2.6e-78	PREDICTED: Erythranthe guttatus uncharacterized LOC105956226 (LOC105956226), mRNA	-	-	-	http://www.genome.jp/dbget-bin/www_bget?ko:-	--	--	--	--	PF03435//PF01220//PF13096//PF01073	Saccharopine dehydrogenase NADP binding domain//Dehydroquinase class II//CENP-A-nucleosome distal (CAD) centromere subunit, CENP-P//3-beta hydroxysteroid dehydrogenase/isomerase family	GO:0008207//GO:0006571//GO:0055114//GO:0034080//GO:0009094//GO:0000162//GO:0008209//GO:0006694//GO:0008210	C21-steroid hormone metabolic process//tyrosine biosynthetic process//oxidation-reduction process//CENP-A containing nucleosome assembly//L-phenylalanine biosynthetic process//tryptophan biosynthetic process//androgen metabolic process//steroid biosynthetic process//estrogen metabolic process	GO:0003855//GO:0016616//GO:0016491//GO:0003854	3-dehydroquinate dehydratase activity//oxidoreductase activity, acting on the CH-OH group of donors, NAD or NADP as acceptor//oxidoreductase activity//3-beta-hydroxy-delta5-steroid dehydrogenase activity	GO:0000775	chromosome, centromeric region	--	--	FALSE	1.20913	1	FALSE	-2.15403	0.361408	FALSE	-1.05355	0.65052	FALSE	2.75759	0.0634628	FALSE	0.558372	0.724288
Cluster-11149.29713	23.66	14.53	9.2	37.59	72.1	4599	1276260594	PIN17596.1	2478	1.5e-276	Ferric reductase, NADH/NADPH oxidase [Handroanthus impetiginosus]	XM_011074961.2	XM_011074961	864	0	PREDICTED: Sesamum indicum respiratory burst oxidase homolog protein C (LOC105158270), mRNA	K13447	RBOH	respiratory burst oxidase [EC:1.6.3.- 1.11.1.-]	http://www.genome.jp/dbget-bin/www_bget?ko:K13447	Q2HXL0	2202	5.9e-246	Respiratory burst oxidase homolog protein C OS=Solanum tuberosum OX=4113 GN=RBOHC PE=1 SV=2	PF08022//PF00036//PF13405//PF09771//PF03348//PF08030//PF13202//PF08414//PF13499	FAD-binding domain//EF hand//EF-hand domain//Transmembrane protein 188//Serine incorporator (Serinc)//Ferric reductase NAD binding domain//EF hand//Respiratory burst NADPH oxidase//EF-hand domain pair	GO:0006979//GO:0035307//GO:0055114//GO:0006804	response to oxidative stress//positive regulation of protein dephosphorylation//oxidation-reduction process//obsolete peroxidase reaction	GO:0004601//GO:0005509//GO:0016491//GO:0050664	peroxidase activity//calcium ion binding//oxidoreductase activity//oxidoreductase activity, acting on NAD(P)H, oxygen as acceptor	GO:0071595//GO:0016020	Nem1-Spo7 phosphatase complex//membrane	--	--	FALSE	-1.17203	0.0312333	FALSE	-1.33527	0.00966091	DOWN	-2.61807	2.26e-08	FALSE	0.00845369	1	DOWN	-1.37682	0.0046537
Cluster-11149.38069	1.61	1.21	2.77	12.51	22.55	464	747101389	XP_011098824.1	273	7.4e-22	glucose-6-phosphate 1-dehydrogenase, cytoplasmic isoform [Sesamum indicum]	XM_011100522.2	XM_011100522	107	1.69e-46	PREDICTED: Sesamum indicum glucose-6-phosphate 1-dehydrogenase, cytoplasmic isoform (LOC105177387), transcript variant X2, mRNA	K00036	G6PD, zwf	glucose-6-phosphate 1-dehydrogenase [EC:1.1.1.49 1.1.1.363]	http://www.genome.jp/dbget-bin/www_bget?ko:K00036	Q9FJI5	200	8.2e-15	Glucose-6-phosphate 1-dehydrogenase 6, cytoplasmic OS=Arabidopsis thaliana OX=3702 GN=G6PD6 PE=1 SV=1	PF00479	Glucose-6-phosphate dehydrogenase, NAD binding domain	GO:0006006//GO:0055114	glucose metabolic process//oxidation-reduction process	GO:0050661//GO:0016614	NADP binding//oxidoreductase activity, acting on CH-OH group of donors	--	--	--	--	DOWN	-3.10858	6.81e-05	FALSE	-1.24871	0.0441282	DOWN	-4.46287	8.02e-11	DOWN	-2.28839	0.00338402	DOWN	-3.58365	7.7e-08
Cluster-11149.10091	4.33	1.6	2.27	3.77	19.41	2098	848931235	XP_012828698.1	663	2e-66	PREDICTED: tropinone reductase-like 1 [Erythranthe guttata]	--	--	--	--	--	-	-	-	http://www.genome.jp/dbget-bin/www_bget?ko:-	H9BFQ0	488	1.5e-47	Tropinone reductase-like 1 OS=Erythroxylum coca OX=289672 PE=2 SV=1	PF03435//PF07460//PF17907//PF01370//PF02737	Saccharopine dehydrogenase NADP binding domain//NUMOD3 motif//AWS domain//NAD dependent epimerase/dehydratase family//3-hydroxyacyl-CoA dehydrogenase, NAD binding domain	GO:0055114//GO:0006554//GO:0006479//GO:0006552//GO:0006568//GO:0006550//GO:0006633//GO:0006574//GO:0018874//GO:0006631	oxidation-reduction process//lysine catabolic process//protein methylation//leucine catabolic process//tryptophan metabolic process//isoleucine catabolic process//fatty acid biosynthetic process//valine catabolic process//benzoate metabolic process//fatty acid metabolic process	GO:0018024//GO:0050662//GO:0003824//GO:0003677//GO:0016491//GO:0003857	histone-lysine N-methyltransferase activity//obsolete coenzyme binding//catalytic activity//DNA binding//oxidoreductase activity//3-hydroxyacyl-CoA dehydrogenase activity	GO:0005634	nucleus	--	--	FALSE	-1.04	0.119717	DOWN	-2.76116	2.42e-08	DOWN	-3.90659	1.73e-14	FALSE	0.874594	0.175929	DOWN	-1.93638	7.34e-05
Cluster-11149.20060	5.8	11.85	6.5	48.66	56.82	2549	747098611	XP_011097326.1	1088	1.3e-115	glucose-6-phosphate 1-dehydrogenase, cytoplasmic isoform [Sesamum indicum]	XR_001173061.1	XR_001173061	478	0	PREDICTED: Erythranthe guttatus glucose-6-phosphate 1-dehydrogenase, cytoplasmic isoform-like (LOC105961032), misc_RNA	K00036	G6PD, zwf	glucose-6-phosphate 1-dehydrogenase [EC:1.1.1.49 1.1.1.363]	http://www.genome.jp/dbget-bin/www_bget?ko:K00036	P37830	1040	1.8e-111	Glucose-6-phosphate 1-dehydrogenase, cytoplasmic isoform OS=Solanum tuberosum OX=4113 GN=G6PDH PE=2 SV=1	PF05706//PF02781//PF00479	Cyclin-dependent kinase inhibitor 3 (CDKN3)//Glucose-6-phosphate dehydrogenase, C-terminal domain//Glucose-6-phosphate dehydrogenase, NAD binding domain	GO:0006470//GO:0006006//GO:0006098//GO:0055114//GO:0006570//GO:0006749	protein dephosphorylation//glucose metabolic process//pentose-phosphate shunt//oxidation-reduction process//tyrosine metabolic process//glutathione metabolic process	GO:0004725//GO:0004345//GO:0050661//GO:0004721//GO:0016614	protein tyrosine phosphatase activity//glucose-6-phosphate dehydrogenase activity//NADP binding//phosphoprotein phosphatase activity//oxidoreductase activity, acting on CH-OH group of donors	--	--	KOG0563	Glucose-6-phosphate 1-dehydrogenase	DOWN	-1.83649	0.000222319	FALSE	-0.619852	0.357601	DOWN	-2.56708	5.27e-08	DOWN	-2.39214	9.19e-07	DOWN	-3.06192	1.63e-10
Cluster-11149.7733	2.14	2.32	1.65	17.76	14.69	2124	1527602064	XP_027077309.1	1187	3.5e-127	alcohol dehydrogenase-like 2 [Coffea arabica]	XM_008210770.3	XM_008210770	35	8.69e-06	PREDICTED: Nasonia vitripennis alcohol dehydrogenase class-3 (LOC100118368), mRNA	K00121	frmA, ADH5, adhC	S-(hydroxymethyl)glutathione dehydrogenase / alcohol dehydrogenase [EC:1.1.1.284 1.1.1.1]	http://www.genome.jp/dbget-bin/www_bget?ko:K00121	Q0V7W6	986	2.7e-105	Alcohol dehydrogenase-like 5 OS=Arabidopsis thaliana OX=3702 GN=At4g22110 PE=2 SV=1	PF08240//PF00107//PF02826//PF02254//PF03721	Alcohol dehydrogenase GroES-like domain//Zinc-binding dehydrogenase//D-isomer specific 2-hydroxyacid dehydrogenase, NAD binding domain//TrkA-N domain//UDP-glucose/GDP-mannose dehydrogenase family, NAD binding domain	GO:0006813//GO:0055114	potassium ion transport//oxidation-reduction process	GO:0016616//GO:0051287	oxidoreductase activity, acting on the CH-OH group of donors, NAD or NADP as acceptor//NAD binding	--	--	KOG0022	Alcohol dehydrogenase, class III	DOWN	-2.73008	6.15e-08	FALSE	-0.122673	1	DOWN	-2.96323	1.91e-09	DOWN	-2.37356	3.02e-06	DOWN	-2.54598	2.66e-07
Cluster-11149.13451	12.77	1	1.51	6.82	13.89	1304	1358174585	PRQ49060.1	148	6.5e-07	putative oxidoreductase [Rosa chinensis]	XM_011086747.2	XM_011086747	68	2.39e-24	PREDICTED: Sesamum indicum 2-alkenal reductase (NADP(+)-dependent) (LOC105167155), mRNA	-	-	-	http://www.genome.jp/dbget-bin/www_bget?ko:-	Q39173	142	1.2e-07	NADP-dependent alkenal double bond reductase P2 OS=Arabidopsis thaliana OX=3702 GN=P2 PE=2 SV=2	PF00107	Zinc-binding dehydrogenase	GO:0055114	oxidation-reduction process	--	--	--	--	--	--	DOWN	-2.55486	1.4e-05	FALSE	-1.42389	0.00858878	DOWN	-4.08824	1.23e-13	UP	1.57736	0.00288556	FALSE	0.103537	1
Cluster-11149.41139	6.47	2.81	2.35	13.97	22.95	923	1279077331	XP_022842676.1	986	3.1e-104	respiratory burst oxidase homolog protein C-like isoform X1 [Olea europaea var. sylvestris]	XM_011084482.2	XM_011084482	311	1.38e-159	PREDICTED: Sesamum indicum respiratory burst oxidase homolog protein C (LOC105165460), mRNA	K13447	RBOH	respiratory burst oxidase [EC:1.6.3.- 1.11.1.-]	http://www.genome.jp/dbget-bin/www_bget?ko:K13447	Q2HXL0	923	2.4e-98	Respiratory burst oxidase homolog protein C OS=Solanum tuberosum OX=4113 GN=RBOHC PE=1 SV=2	PF13202//PF13405//PF13499//PF08414//PF00036	EF hand//EF-hand domain//EF-hand domain pair//Respiratory burst NADPH oxidase//EF hand	GO:0006979//GO:0055114//GO:0006804	response to oxidative stress//oxidation-reduction process//obsolete peroxidase reaction	GO:0004601//GO:0005509//GO:0050664	peroxidase activity//calcium ion binding//oxidoreductase activity, acting on NAD(P)H, oxygen as acceptor	--	--	--	--	DOWN	-2.10132	0.000192702	FALSE	-1.11355	0.0498327	DOWN	-3.32495	2.39e-10	FALSE	-0.442347	0.668963	DOWN	-1.60566	0.00185558
Cluster-11149.28774	3.56	3.94	2.63	2.21	27.29	1792	1276267936	PIN23801.1	806	4.5e-83	Flavonol reductase/cinnamoyl-CoA reductase [Handroanthus impetiginosus]	XM_027303696.1	XM_027303696	87	9.06e-35	PREDICTED: Coffea eugenioides vestitone reductase-like (LOC113760941), mRNA	-	-	-	http://www.genome.jp/dbget-bin/www_bget?ko:-	Q40316	643	1.4e-65	Vestitone reductase OS=Medicago sativa OX=3879 PE=1 SV=1	PF01370//PF00250//PF01073	NAD dependent epimerase/dehydratase family//Forkhead domain//3-beta hydroxysteroid dehydrogenase/isomerase family	GO:0008207//GO:0055114//GO:0006694//GO:0008210//GO:0006355//GO:0008209	C21-steroid hormone metabolic process//oxidation-reduction process//steroid biosynthetic process//estrogen metabolic process//regulation of transcription, DNA-templated//androgen metabolic process	GO:0003854//GO:0016616//GO:0003700//GO:0003824//GO:0043565//GO:0050662	3-beta-hydroxy-delta5-steroid dehydrogenase activity//oxidoreductase activity, acting on the CH-OH group of donors, NAD or NADP as acceptor//DNA-binding transcription factor activity//catalytic activity//sequence-specific DNA binding//obsolete coenzyme binding	GO:0005667	transcription regulator complex	--	--	FALSE	1.03848	0.110043	DOWN	-4.02204	9.59e-15	DOWN	-3.09423	2.28e-10	FALSE	1.36168	0.021518	DOWN	-2.70999	2.98e-08
Cluster-11149.27760	2.56	2.92	1.45	3.61	15.08	1771	1276263880	PIN20376.1	1805	6.4e-199	UDP-glucose 4-epimerase/UDP-sulfoquinovose synthase [Handroanthus impetiginosus]	XM_020695894.1	XM_020695894	667	0	PREDICTED: Sesamum indicum probable UDP-arabinose 4-epimerase 3 (LOC105167431), transcript variant X4, mRNA	K12448	UXE, uxe	UDP-arabinose 4-epimerase	http://www.genome.jp/dbget-bin/www_bget?ko:K12448	Q9SA77	1665	4.2e-184	UDP-arabinose 4-epimerase 1 OS=Arabidopsis thaliana OX=3702 GN=MUR4 PE=1 SV=1	PF01370//PF08241//PF01073//PF03345	NAD dependent epimerase/dehydratase family//Methyltransferase domain//3-beta hydroxysteroid dehydrogenase/isomerase family//Oligosaccharyltransferase 48 kDa subunit beta	GO:0008210//GO:0006694//GO:0018279//GO:0008209//GO:0055114//GO:0008207	estrogen metabolic process//steroid biosynthetic process//protein N-linked glycosylation via asparagine//androgen metabolic process//oxidation-reduction process//C21-steroid hormone metabolic process	GO:0050662//GO:0008168//GO:0003854//GO:0003824//GO:0016616	obsolete coenzyme binding//methyltransferase activity//3-beta-hydroxy-delta5-steroid dehydrogenase activity//catalytic activity//oxidoreductase activity, acting on the CH-OH group of donors, NAD or NADP as acceptor	GO:0005789	endoplasmic reticulum membrane	KOG1371	UDP-glucose 4-epimerase/UDP-sulfoquinovose synthase	FALSE	-0.100138	1	DOWN	-2.45897	9.98e-07	DOWN	-2.66966	6.22e-08	FALSE	0.180279	1	DOWN	-2.32834	3.05e-06
Cluster-11149.3537	1.67	1.77	1.53	17.61	16.83	1516	1276267936	PIN23801.1	1195	3e-128	Flavonol reductase/cinnamoyl-CoA reductase [Handroanthus impetiginosus]	XM_011092376.2	XM_011092376	200	1.17e-97	PREDICTED: Sesamum indicum vestitone reductase (LOC105171303), mRNA	-	-	-	http://www.genome.jp/dbget-bin/www_bget?ko:-	Q40316	871	4.2e-92	Vestitone reductase OS=Medicago sativa OX=3879 PE=1 SV=1	PF01370//PF01073	NAD dependent epimerase/dehydratase family//3-beta hydroxysteroid dehydrogenase/isomerase family	GO:0055114//GO:0008207//GO:0008209//GO:0006694//GO:0008210	oxidation-reduction process//C21-steroid hormone metabolic process//androgen metabolic process//steroid biosynthetic process//estrogen metabolic process	GO:0016616//GO:0003824//GO:0003854//GO:0050662	oxidoreductase activity, acting on the CH-OH group of donors, NAD or NADP as acceptor//catalytic activity//3-beta-hydroxy-delta5-steroid dehydrogenase activity//obsolete coenzyme binding	--	--	--	--	DOWN	-3.10522	3.27e-09	FALSE	-0.331458	0.751054	DOWN	-3.54685	6.59e-12	DOWN	-2.7189	2.27e-07	DOWN	-3.09984	1.65e-09
Cluster-11149.23142	9.09	12	5.09	3.13	58.06	2098	747048751	XP_011070396.1	956	2.1e-100	alcohol dehydrogenase-like 4 [Sesamum indicum]	XM_011072094.2	XM_011072094	446	0	PREDICTED: Sesamum indicum alcohol dehydrogenase-like 4 (LOC105156063), mRNA	K00001	E1.1.1.1, adh	alcohol dehydrogenase	http://www.genome.jp/dbget-bin/www_bget?ko:K00001	Q8VZ49	749	8.1e-78	Alcohol dehydrogenase-like 4 OS=Arabidopsis thaliana OX=3702 GN=At1g64710 PE=2 SV=1	PF00107//PF09264//PF08240//PF02826//PF03721	Zinc-binding dehydrogenase//Vibrio cholerae sialidase, lectin insertion//Alcohol dehydrogenase GroES-like domain//D-isomer specific 2-hydroxyacid dehydrogenase, NAD binding domain//UDP-glucose/GDP-mannose dehydrogenase family, NAD binding domain	GO:0055114	oxidation-reduction process	GO:0051287//GO:0033691//GO:0016616	NAD binding//sialic acid binding//oxidoreductase activity, acting on the CH-OH group of donors, NAD or NADP as acceptor	--	--	KOG0022	Alcohol dehydrogenase, class III	UP	2.14079	2.53e-05	DOWN	-4.60989	1e-18	DOWN	-2.5799	4.84e-08	UP	2.21298	1.36e-05	DOWN	-2.44675	2.63e-07
Cluster-11149.1031	1.17	0.32	0.23	1.12	2.92	1192	1241380827	ASZ85176.1	1709	5.9e-188	elongation factor 1-alpha [Hylocereus polyrhizus]	BK006064.1	BK006064	711	0	TPA_inf: Pristionchus pacificus eukaryotic translation elongation factor 1A (eft-1) mRNA, complete cds	K03231	EEF1A	elongation factor 1-alpha	http://www.genome.jp/dbget-bin/www_bget?ko:K03231	Q2HJN9	1939	4.8e-216	Elongation factor 1-alpha 4 OS=Oscheius tipulae OX=141969 GN=eft-4 PE=3 SV=1	PF00009//PF04670//PF03144//PF01926//PF02774	Elongation factor Tu GTP binding domain//Gtr1/RagA G protein conserved region//Elongation factor Tu domain 2//50S ribosome-binding GTPase//Semialdehyde dehydrogenase, dimerisation domain	GO:0008652	cellular amino acid biosynthetic process	GO:0046983//GO:0016620//GO:0003924//GO:0005525	protein dimerization activity//oxidoreductase activity, acting on the aldehyde or oxo group of donors, NAD or NADP as acceptor//GTPase activity//GTP binding	--	--	KOG0052	Translation elongation factor EF-1 alpha/Tu	FALSE	-1.60558	0.167254	FALSE	-1.7734	0.00790153	DOWN	-3.48546	1.54e-06	FALSE	0.726836	0.536096	FALSE	-1.09546	0.109024
Cluster-11149.40922	0.33	0.72	0.62	3.9	8.25	3856	1173794132	XP_011078139.2	2171	5.1e-241	LOW QUALITY PROTEIN: respiratory burst oxidase homolog protein E [Sesamum indicum]	XM_011079837.2	XM_011079837	913	0	PREDICTED: Sesamum indicum respiratory burst oxidase homolog protein E (LOC105161955), mRNA	K13447	RBOH	respiratory burst oxidase [EC:1.6.3.- 1.11.1.-]	http://www.genome.jp/dbget-bin/www_bget?ko:K13447	O81211	1643	3.2e-181	Respiratory burst oxidase homolog protein E OS=Arabidopsis thaliana OX=3702 GN=RBOHE PE=2 SV=2	PF13202//PF08030//PF13499//PF08414//PF00036//PF00175//PF13405//PF08022	EF hand//Ferric reductase NAD binding domain//EF-hand domain pair//Respiratory burst NADPH oxidase//EF hand//oxidoreductase NAD-binding domain//EF-hand domain//FAD-binding domain	GO:0006979//GO:0055114//GO:0006804	response to oxidative stress//oxidation-reduction process//obsolete peroxidase reaction	GO:0016491//GO:0005509//GO:0050664//GO:0004601	oxidoreductase activity//calcium ion binding//oxidoreductase activity, acting on NAD(P)H, oxygen as acceptor//peroxidase activity	--	--	--	--	DOWN	-2.23497	2.82e-05	DOWN	-1.4752	0.00471352	DOWN	-3.82043	9.33e-14	DOWN	-2.89279	1.8e-07	DOWN	-4.41697	5.81e-16
Cluster-11149.23463	56.37	1.36	3.99	82.1	60.66	1189	1315971312	GAY36785.1	185	3e-11	hypothetical protein CUMW_024510 [Citrus unshiu]	XM_011100422.2	XM_011100422	105	5.86e-45	PREDICTED: Sesamum indicum UDP-glucose 6-dehydrogenase 1 (LOC105177312), transcript variant X2, mRNA	K00012	UGDH, ugd	UDPglucose 6-dehydrogenase	http://www.genome.jp/dbget-bin/www_bget?ko:K00012	Q96558	180	4.4e-12	UDP-glucose 6-dehydrogenase 1 OS=Glycine max OX=3847 GN=UGD1 PE=2 SV=1	PF03721//PF03435	UDP-glucose/GDP-mannose dehydrogenase family, NAD binding domain//Saccharopine dehydrogenase NADP binding domain	GO:0055114	oxidation-reduction process	GO:0051287//GO:0016491//GO:0016616	NAD binding//oxidoreductase activity//oxidoreductase activity, acting on the CH-OH group of donors, NAD or NADP as acceptor	--	--	KOG2666	UDP-glucose/GDP-mannose dehydrogenase	DOWN	-5.70505	2.04e-24	FALSE	0.039302	1	DOWN	-5.7754	7.72e-25	FALSE	0.129047	1	FALSE	0.118342	0.967644
Cluster-11149.4292	0.83	0.95	1.55	16.8	24	1271	1600645146	TEY29000.1	717	6.7e-73	NAD(P)H dehydrogenase (quinone) [Salvia splendens]	XM_011097871.2	XM_011097871	255	2.59e-128	PREDICTED: Sesamum indicum probable NAD(P)H dehydrogenase (quinone) FQR1-like 1 (LOC105175436), mRNA	K03809	wrbA	NAD(P)H dehydrogenase (quinone)	http://www.genome.jp/dbget-bin/www_bget?ko:K03809	Q9AYU0	694	1.2e-71	Quinone-oxidoreductase QR2 OS=Triphysaria versicolor OX=64093 PE=1 SV=1	PF00258//PF03358//PF00418	Flavodoxin//NADPH-dependent FMN reductase//Tau and MAP protein, tubulin-binding repeat	--	--	GO:0015631//GO:0016491//GO:0010181	tubulin binding//oxidoreductase activity//FMN binding	GO:0045298	tubulin complex	KOG3135	1,4-benzoquinone reductase-like; Trp repressor binding protein-like/protoplast-secreted protein	DOWN	-3.93505	3.1e-12	FALSE	-0.911359	0.122577	DOWN	-4.95572	7.97e-19	DOWN	-3.65775	1.1e-10	DOWN	-4.61771	2.15e-16
Cluster-11149.44735	0.91	1.47	0.31	2.57	4.82	1090	1276251182	PIN09924.1	1186	2.4e-127	Reductase [Handroanthus impetiginosus]	XM_012979217.1	XM_012979217	360	0	PREDICTED: Erythranthe guttatus short-chain dehydrogenase reductase 3b-like (LOC105955486), mRNA	-	-	-	http://www.genome.jp/dbget-bin/www_bget?ko:-	Q94K41	824	8.5e-87	Short-chain dehydrogenase reductase 3b OS=Arabidopsis thaliana OX=3702 GN=SDR3b PE=2 SV=1	PF00440//PF03435//PF01073//PF02737//PF01370	Bacterial regulatory proteins, tetR family//Saccharopine dehydrogenase NADP binding domain//3-beta hydroxysteroid dehydrogenase/isomerase family//3-hydroxyacyl-CoA dehydrogenase, NAD binding domain//NAD dependent epimerase/dehydratase family	GO:0006568//GO:0006552//GO:0006550//GO:0008209//GO:0006633//GO:0055114//GO:0008207//GO:0006554//GO:0018874//GO:0006631//GO:0006694//GO:0008210//GO:0006574	tryptophan metabolic process//leucine catabolic process//isoleucine catabolic process//androgen metabolic process//fatty acid biosynthetic process//oxidation-reduction process//C21-steroid hormone metabolic process//lysine catabolic process//benzoate metabolic process//fatty acid metabolic process//steroid biosynthetic process//estrogen metabolic process//valine catabolic process	GO:0050662//GO:0003857//GO:0003824//GO:0016616//GO:0016491//GO:0003677//GO:0003854	obsolete coenzyme binding//3-hydroxyacyl-CoA dehydrogenase activity//catalytic activity//oxidoreductase activity, acting on the CH-OH group of donors, NAD or NADP as acceptor//oxidoreductase activity//DNA binding//3-beta-hydroxy-delta5-steroid dehydrogenase activity	--	--	--	--	FALSE	-0.599172	0.60183	FALSE	-1.3044	0.0430086	DOWN	-2.01347	0.000579822	FALSE	-0.81988	0.391309	DOWN	-2.17281	0.000558308
Cluster-11149.7715	0.38	1.46	0.67	8.27	13.88	1364	848850236	XP_012832887.1	1464	1.7e-159	PREDICTED: probable indole-3-pyruvate monooxygenase YUCCA10 [Erythranthe guttata]	XM_023882595.1	XM_023882595	131	2.38e-59	PREDICTED: Lactuca sativa probable indole-3-pyruvate monooxygenase YUCCA10 (LOC111886365), partial mRNA	K11816	YUCCA	indole-3-pyruvate monooxygenase	http://www.genome.jp/dbget-bin/www_bget?ko:K11816	Q9FVQ0	948	4.5e-101	Probable indole-3-pyruvate monooxygenase YUCCA10 OS=Arabidopsis thaliana OX=3702 GN=YUC10 PE=2 SV=1	PF01266//PF00743//PF01494//PF07992	FAD dependent oxidoreductase//Flavin-binding monooxygenase-like//FAD binding domain//Pyridine nucleotide-disulphide oxidoreductase	GO:0055114	oxidation-reduction process	GO:0004499//GO:0016491//GO:0071949//GO:0050661//GO:0050660	N,N-dimethylaniline monooxygenase activity//oxidoreductase activity//FAD binding//NADP binding//flavin adenine dinucleotide binding	--	--	--	--	DOWN	-2.2913	4.26e-05	FALSE	-1.14379	0.0427321	DOWN	-3.54504	2.11e-11	DOWN	-3.75419	2.48e-09	DOWN	-4.94516	4.97e-16
Cluster-11149.26610	3.94	5.09	2.46	16.58	51.89	1703	1276253582	PIN11796.1	1140	8e-122	Flavonol reductase/cinnamoyl-CoA reductase [Handroanthus impetiginosus]	--	--	--	--	--	-	-	-	http://www.genome.jp/dbget-bin/www_bget?ko:-	Q40316	778	2.9e-81	Vestitone reductase OS=Medicago sativa OX=3879 PE=1 SV=1	PF01073//PF05699//PF14560//PF01370	3-beta hydroxysteroid dehydrogenase/isomerase family//hAT family C-terminal dimerisation region//Ubiquitin-like domain//NAD dependent epimerase/dehydratase family	GO:0008210//GO:0006694//GO:0008209//GO:0008207//GO:0055114	estrogen metabolic process//steroid biosynthetic process//androgen metabolic process//C21-steroid hormone metabolic process//oxidation-reduction process	GO:0005515//GO:0050662//GO:0003854//GO:0046983//GO:0016616//GO:0003824	protein binding//obsolete coenzyme binding//3-beta-hydroxy-delta5-steroid dehydrogenase activity//protein dimerization activity//oxidoreductase activity, acting on the CH-OH group of donors, NAD or NADP as acceptor//catalytic activity	--	--	--	--	FALSE	-1.50049	0.00527179	DOWN	-2.04187	3.06e-05	DOWN	-3.65297	9.59e-14	FALSE	-1.40061	0.00979124	DOWN	-3.49227	1.22e-12
Cluster-11149.980	0.02	0.19	0.19	2.36	8.03	2301	1173789603	XP_020548932.1	2997	0	ferric reduction oxidase 4 [Sesamum indicum]	XM_020693273.1	XM_020693273	1194	0	PREDICTED: Sesamum indicum ferric reduction oxidase 4 (LOC105160697), mRNA	K00521	E1.16.1.7	ferric-chelate reductase	http://www.genome.jp/dbget-bin/www_bget?ko:K00521	Q8W110	1982	9.5e-221	Ferric reduction oxidase 4 OS=Arabidopsis thaliana OX=3702 GN=FRO4 PE=2 SV=1	PF00175//PF08030//PF08022	oxidoreductase NAD-binding domain//Ferric reductase NAD binding domain//FAD-binding domain	GO:0055114	oxidation-reduction process	GO:0016491	oxidoreductase activity	--	--	KOG0039	Ferric reductase, NADH/NADPH oxidase and related proteins	DOWN	-3.39527	2.97e-07	DOWN	-2.15896	2.47e-05	DOWN	-5.66147	1.48e-19	DOWN	-6.03575	1.5e-10	DOWN	-8.21855	4.31e-23
Cluster-11149.44719	0.66	0.36	0.28	28.28	14.92	1977	747083038	XP_011088871.1	2037	9e-226	alcohol-forming fatty acyl-CoA reductase isoform X1 [Sesamum indicum]	XM_011090569.2	XM_011090569	799	0	PREDICTED: Sesamum indicum alcohol-forming fatty acyl-CoA reductase (LOC105170000), transcript variant X1, mRNA	-	-	-	http://www.genome.jp/dbget-bin/www_bget?ko:-	Q9XGY7	1513	2e-166	Alcohol-forming fatty acyl-CoA reductase OS=Simmondsia chinensis OX=3999 PE=1 SV=1	PF01073//PF01370	3-beta hydroxysteroid dehydrogenase/isomerase family//NAD dependent epimerase/dehydratase family	GO:0008209//GO:0008210//GO:0006694//GO:0055114//GO:0008207	androgen metabolic process//estrogen metabolic process//steroid biosynthetic process//oxidation-reduction process//C21-steroid hormone metabolic process	GO:0050662//GO:0003824//GO:0016616//GO:0003854	obsolete coenzyme binding//catalytic activity//oxidoreductase activity, acting on the CH-OH group of donors, NAD or NADP as acceptor//3-beta-hydroxy-delta5-steroid dehydrogenase activity	--	--	KOG1221	Acyl-CoA reductase	DOWN	-6.09467	1.6e-24	FALSE	0.526281	0.477369	DOWN	-5.67683	7.67e-22	DOWN	-4.73831	7.42e-18	DOWN	-4.26103	3.98e-15
Cluster-11149.3292	0.27	0.06	0.06	2.83	3.49	1029	1173769405	XP_020553141.1	1135	1.8e-121	tetraketide alpha-pyrone reductase 1-like [Sesamum indicum]	XM_012994238.1	XM_012994238	182	7.94e-88	PREDICTED: Erythranthe guttatus cinnamoyl-CoA reductase 1-like (LOC105969485), transcript variant X2, mRNA	-	-	-	http://www.genome.jp/dbget-bin/www_bget?ko:-	Q9S9N9	672	3.4e-69	Cinnamoyl-CoA reductase 1 OS=Arabidopsis thaliana OX=3702 GN=CCR1 PE=1 SV=1	PF01073//PF01370	3-beta hydroxysteroid dehydrogenase/isomerase family//NAD dependent epimerase/dehydratase family	GO:0008207//GO:0055114//GO:0008209//GO:0008210//GO:0006694	C21-steroid hormone metabolic process//oxidation-reduction process//androgen metabolic process//estrogen metabolic process//steroid biosynthetic process	GO:0016616//GO:0003824//GO:0003854//GO:0050662	oxidoreductase activity, acting on the CH-OH group of donors, NAD or NADP as acceptor//catalytic activity//3-beta-hydroxy-delta5-steroid dehydrogenase activity//obsolete coenzyme binding	--	--	--	--	DOWN	-5.28508	3.49e-07	FALSE	-0.699961	0.413426	DOWN	-6.06651	1.26e-09	DOWN	-2.67602	0.00172432	DOWN	-3.42066	1.24e-05
Cluster-11149.48547	0	0	0.03	0.33	3.5	1662	1343986416	XP_023875106.1	1584	2.5e-173	isocitrate dehydrogenase [NAD] subunit 1, mitochondrial [Quercus suber]	XM_024905976.1	XM_024905976	567	0	Trichoderma asperellum CBS 433.97 hypothetical protein (M441DRAFT_436740), mRNA	K00030	IDH3	isocitrate dehydrogenase (NAD+)	http://www.genome.jp/dbget-bin/www_bget?ko:K00030	O13302	1589	2.5e-175	Isocitrate dehydrogenase [NAD] subunit 1, mitochondrial OS=Ajellomyces capsulatus OX=5037 GN=IDH1 PE=2 SV=1	PF00441//PF00180	Acyl-CoA dehydrogenase, C-terminal domain//Isocitrate/isopropylmalate dehydrogenase	GO:0055114	oxidation-reduction process	GO:0016616//GO:0016627	oxidoreductase activity, acting on the CH-OH group of donors, NAD or NADP as acceptor//oxidoreductase activity, acting on the CH-CH group of donors	--	--	KOG0784	Isocitrate dehydrogenase, gamma subunit	FALSE	-6.35128	0.0263893	DOWN	-3.79338	4.19e-09	DOWN	-9.98905	2.91e-15	FALSE	-6.17945	0.0382676	DOWN	-9.74848	4.84e-14
Cluster-11149.48047	0	0	0	0.28	12.09	1297	1344054133	XP_023910404.1	748	1.7e-76	probable inactive reductase easA [Quercus suber]	XM_018415235.1	XM_018415235	60	6.64e-20	Rhodotorula graminis WP1 hypothetical protein partial mRNA	K05894	OPR	12-oxophytodienoic acid reductase	http://www.genome.jp/dbget-bin/www_bget?ko:K05894	B8NWW6	860	6.8e-91	NADP-dependent oxidoreductase lnbE OS=Aspergillus flavus (strain ATCC 200026 / FGSC A1120 / NRRL 3357 / JCM 12722 / SRRC 167) OX=332952 GN=lnbE PE=3 SV=1	PF00724	NADH:flavin oxidoreductase / NADH oxidase family	GO:0055114	oxidation-reduction process	GO:0016491//GO:0010181	oxidoreductase activity//FMN binding	--	--	KOG0134	NADH:flavin oxidoreductase/12-oxophytodienoate reductase	FALSE	-5.70927	0.101362	DOWN	-5.78826	1.87e-18	DOWN	-11.3424	1.68e-23	FALSE	-5.5387	0.148189	DOWN	-11.1016	5.88e-22
Cluster-11149.1147	0	0	0	0.08	2.67	1268	1344054133	XP_023910404.1	739	1.9e-75	probable inactive reductase easA [Quercus suber]	--	--	--	--	--	K05894	OPR	12-oxophytodienoic acid reductase	http://www.genome.jp/dbget-bin/www_bget?ko:K05894	B8NWW6	778	2.1e-81	NADP-dependent oxidoreductase lnbE OS=Aspergillus flavus (strain ATCC 200026 / FGSC A1120 / NRRL 3357 / JCM 12722 / SRRC 167) OX=332952 GN=lnbE PE=3 SV=1	PF00724	NADH:flavin oxidoreductase / NADH oxidase family	GO:0055114	oxidation-reduction process	GO:0016491//GO:0010181	oxidoreductase activity//FMN binding	--	--	KOG0134	NADH:flavin oxidoreductase/12-oxophytodienoate reductase	FALSE	-3.96925	0.835728	DOWN	-5.30456	1.22e-09	DOWN	-9.12201	9.29e-11	FALSE	-3.80692	0.806498	DOWN	-8.88165	8.92e-10
Cluster-11149.1084	0	0	0	0.54	9.97	2355	1344032690	XP_023899506.1	1325	3.9e-143	NADPH--cytochrome P450 reductase-like [Quercus suber]	AF193062.1	AF193062	119	1.95e-52	Phanerochaete chrysosporium NADPH-dependent cytochrome P450 oxidoreductase (CPR) mRNA, partial cds, alternatively polyadenylated	K00327	POR	NADPH-ferrihemoprotein reductase	http://www.genome.jp/dbget-bin/www_bget?ko:K00327	Q9HDG2	2545	5e-286	NADPH--cytochrome P450 reductase OS=Phanerochaete chrysosporium OX=5306 GN=CPR PE=2 SV=1	PF00667//PF00175//PF00258	FAD binding domain//oxidoreductase NAD-binding domain//Flavodoxin	GO:0055114	oxidation-reduction process	GO:0016491//GO:0010181	oxidoreductase activity//FMN binding	--	--	KOG1158	NADP/FAD dependent oxidoreductase	DOWN	-7.63623	5.17e-05	DOWN	-4.59318	2.44e-16	DOWN	-12.0732	2.75e-28	DOWN	-7.46306	0.000149922	DOWN	-11.8324	1.2e-26
Cluster-6734.0	0	0	0	0.39	1.32	577	971511375	GAQ86826.1	548	1.2e-53	NADH:flavin oxidoreductase or 12-oxophytodienoate reductase [Klebsormidium nitens]	--	--	--	--	--	-	-	-	http://www.genome.jp/dbget-bin/www_bget?ko:-	C5D427	481	2.7e-47	NADPH dehydrogenase OS=Geobacillus sp. (strain WCH70) OX=471223 GN=namA PE=3 SV=1	PF04309//PF01207//PF00724	Glycerol-3-phosphate responsive antiterminator//Dihydrouridine synthase (Dus)//NADH:flavin oxidoreductase / NADH oxidase family	GO:0006355//GO:0006071//GO:0008033//GO:0055114	regulation of transcription, DNA-templated//glycerol metabolic process//tRNA processing//oxidation-reduction process	GO:0010181//GO:0050660//GO:0016491//GO:0017150	FMN binding//flavin adenine dinucleotide binding//oxidoreductase activity//tRNA dihydrouridine synthase activity	--	--	KOG0134	NADH:flavin oxidoreductase/12-oxophytodienoate reductase	FALSE	-4.52318	0.566119	FALSE	-2.10963	0.144338	FALSE	-6.48032	0.00923724	FALSE	-4.35711	0.806498	FALSE	-6.24242	0.0245024
Cluster-11149.48909	0	0	0	0.1	1.51	1079	1344032690	XP_023899506.1	1147	7.8e-123	NADPH--cytochrome P450 reductase-like [Quercus suber]	XM_031179358.1	XM_031179358	112	6.81e-49	Fusarium oxysporum NRRL 32931 NADPH-cytochrome P450 reductase (FOYG_05079), mRNA	K00327	POR	NADPH-ferrihemoprotein reductase	http://www.genome.jp/dbget-bin/www_bget?ko:K00327	A2QS05	1148	2.3e-124	NADPH--cytochrome P450 reductase OS=Aspergillus niger (strain CBS 513.88 / FGSC A1513) OX=425011 GN=cprA PE=3 SV=1	PF00175//PF00667	oxidoreductase NAD-binding domain//FAD binding domain	GO:0055114	oxidation-reduction process	GO:0016491	oxidoreductase activity	--	--	KOG1158	NADP/FAD dependent oxidoreductase	FALSE	-3.96925	0.835728	DOWN	-4.18812	2.56e-05	DOWN	-8.00574	2.92e-06	FALSE	-3.80692	0.806498	DOWN	-7.76594	1.35e-05
Cluster-5718.0	0	0	0	0.59	1.19	540	1344002597	XP_023883638.1	554	2.3e-54	bifunctional cytochrome P450/NADPH--P450 reductase-like [Quercus suber]	XM_018529058.1	XM_018529058	117	5.48e-52	Alternaria alternata NADPH-cytochrome P450 reductase-like protein partial mRNA	K00327	POR	NADPH-ferrihemoprotein reductase	http://www.genome.jp/dbget-bin/www_bget?ko:K00327	Q9Y8G7	611	2.1e-62	Bifunctional cytochrome P450/NADPH--P450 reductase OS=Fusarium oxysporum OX=5507 GN=CYP505 PE=1 SV=1	PF00667//PF00175	FAD binding domain//oxidoreductase NAD-binding domain	GO:0055114	oxidation-reduction process	GO:0016491	oxidoreductase activity	--	--	KOG1158	NADP/FAD dependent oxidoreductase	FALSE	-4.92245	0.380656	FALSE	-1.393	0.446034	FALSE	-6.16242	0.0233754	FALSE	-4.75444	0.557126	FALSE	-5.92525	0.0393902
Cluster-4642.0	0	0	0	0.08	1.66	2450	1344032215	XP_023899257.1	1557	5.1e-170	bifunctional cytochrome P450/NADPH--P450 reductase-like [Quercus suber]	--	--	--	--	--	K00327	POR	NADPH-ferrihemoprotein reductase	http://www.genome.jp/dbget-bin/www_bget?ko:K00327	Q9Y8G7	2262	3.4e-253	Bifunctional cytochrome P450/NADPH--P450 reductase OS=Fusarium oxysporum OX=5507 GN=CYP505 PE=1 SV=1	PF00258//PF00667//PF00067//PF00175	Flavodoxin//FAD binding domain//Cytochrome P450//oxidoreductase NAD-binding domain	GO:0055114	oxidation-reduction process	GO:0005506//GO:0016491//GO:0010181//GO:0020037//GO:0016705	iron ion binding//oxidoreductase activity//FMN binding//heme binding//oxidoreductase activity, acting on paired donors, with incorporation or reduction of molecular oxygen	--	--	KOG1158	NADP/FAD dependent oxidoreductase	FALSE	-4.92245	0.380656	DOWN	-4.78508	4.73e-10	DOWN	-9.55345	6.75e-13	FALSE	-4.75444	0.557126	DOWN	-9.31297	8.02e-12
Cluster-11149.1545	0	0	0	0.24	6.57	3266	326521434	BAJ96920.1	2040	6.7e-226	predicted protein [Hordeum vulgare subsp. vulgare]	--	--	--	--	--	K00327	POR	NADPH-ferrihemoprotein reductase	http://www.genome.jp/dbget-bin/www_bget?ko:K00327	Q9Y8G7	2289	3.4e-256	Bifunctional cytochrome P450/NADPH--P450 reductase OS=Fusarium oxysporum OX=5507 GN=CYP505 PE=1 SV=1	PF00067//PF00175//PF00258//PF00667	Cytochrome P450//oxidoreductase NAD-binding domain//Flavodoxin//FAD binding domain	GO:0055114	oxidation-reduction process	GO:0016491//GO:0010181//GO:0020037//GO:0005506//GO:0016705	oxidoreductase activity//FMN binding//heme binding//iron ion binding//oxidoreductase activity, acting on paired donors, with incorporation or reduction of molecular oxygen	--	--	KOG1158	NADP/FAD dependent oxidoreductase	DOWN	-6.97306	0.00189791	DOWN	-5.17404	3.32e-18	DOWN	-11.9911	9.79e-28	DOWN	-6.80044	0.00407161	DOWN	-11.7504	4.08e-26
Cluster-6814.0	0	0	0	0.14	1.66	562	1343980196	XP_023887112.1	485	2.4e-46	uncharacterized FAD-binding protein C12C2.03c-like [Quercus suber]	XM_007917514.1	XM_007917514	192	1.16e-93	Phaeoacremonium minimum UCRPA7 putative fad binding domain-containing protein partial mRNA	-	-	-	http://www.genome.jp/dbget-bin/www_bget?ko:-	Q9US28	344	2e-31	Uncharacterized FAD-binding protein C1783.01 OS=Schizosaccharomyces pombe (strain 972 / ATCC 24843) OX=284812 GN=SPAC1783.01 PE=3 SV=1	PF00175	oxidoreductase NAD-binding domain	GO:0055114	oxidation-reduction process	GO:0016491	oxidoreductase activity	--	--	KOG1158	NADP/FAD dependent oxidoreductase	FALSE	-3.05854	1	FALSE	-3.82923	0.0286906	DOWN	-6.74066	0.00373694	FALSE	-2.90649	1	FALSE	-6.50228	0.00984351
Cluster-5325.0	0	0	0	0.29	9.07	1725	1343996464	XP_023880354.1	1477	6.8e-161	glutathione reductase-like [Quercus suber]	XM_018280822.1	XM_018280822	315	1.57e-161	Pochonia chlamydosporia 170 glutathione reductase (VFPPC_00889), partial mRNA	K00383	GSR, gor	glutathione reductase (NADPH)	http://www.genome.jp/dbget-bin/www_bget?ko:K00383	Q873E8	1723	7.7e-191	Glutathione reductase OS=Neurospora crassa (strain ATCC 24698 / 74-OR23-1A / CBS 708.71 / DSM 1257 / FGSC 987) OX=367110 GN=gtr-1 PE=3 SV=1	PF01266//PF02852//PF01210//PF01494//PF02826//PF03721//PF02737//PF07992	FAD dependent oxidoreductase//Pyridine nucleotide-disulphide oxidoreductase, dimerisation domain//NAD-dependent glycerol-3-phosphate dehydrogenase N-terminus//FAD binding domain//D-isomer specific 2-hydroxyacid dehydrogenase, NAD binding domain//UDP-glucose/GDP-mannose dehydrogenase family, NAD binding domain//3-hydroxyacyl-CoA dehydrogenase, NAD binding domain//Pyridine nucleotide-disulphide oxi…	GO:0006633//GO:0006550//GO:0006552//GO:0006568//GO:0046168//GO:0006554//GO:0055114//GO:0018874//GO:0006631//GO:0006574//GO:0045454	fatty acid biosynthetic process//isoleucine catabolic process//leucine catabolic process//tryptophan metabolic process//glycerol-3-phosphate catabolic process//lysine catabolic process//oxidation-reduction process//benzoate metabolic process//fatty acid metabolic process//valine catabolic process//cell redox homeostasis	GO:0051287//GO:0071949//GO:0003857//GO:0016491//GO:0016616	NAD binding//FAD binding//3-hydroxyacyl-CoA dehydrogenase activity//oxidoreductase activity//oxidoreductase activity, acting on the CH-OH group of donors, NAD or NADP as acceptor	--	--	KOG0405	Pyridine nucleotide-disulphide oxidoreductase	FALSE	-6.21554	0.0416009	DOWN	-5.36346	2.52e-17	DOWN	-11.4234	5.26e-24	FALSE	-6.04393	0.0606833	DOWN	-11.1827	1.81e-22
Cluster-11149.47763	0	0	0	0.26	9.23	1904	1343973311	XP_023870760.1	1028	8.7e-109	putative NADPH dehydrogenase C23G7.10c [Quercus suber]	XM_016380814.1	XM_016380814	36	2.16e-06	Exophiala spinifera hypothetical protein partial mRNA	-	-	-	http://www.genome.jp/dbget-bin/www_bget?ko:-	B8N8Q9	876	1.4e-92	NADPH dehydrogenase afvA OS=Aspergillus flavus (strain ATCC 200026 / FGSC A1120 / NRRL 3357 / JCM 12722 / SRRC 167) OX=332952 GN=afvA PE=2 SV=1	PF00724	NADH:flavin oxidoreductase / NADH oxidase family	GO:0055114	oxidation-reduction process	GO:0010181//GO:0016491	FMN binding//oxidoreductase activity	--	--	KOG0134	NADH:flavin oxidoreductase/12-oxophytodienoate reductase	FALSE	-6.21554	0.0416009	DOWN	-5.55431	1.99e-18	DOWN	-11.6143	3.06e-25	FALSE	-6.04393	0.0606833	DOWN	-11.3735	1.12e-23
Cluster-3073.0	0	0	0	0	2.41	1000	326507416	BAK03101.1	1215	9.4e-131	predicted protein [Hordeum vulgare subsp. vulgare]	XM_016727474.1	XM_016727474	237	2.05e-118	Sporothrix schenckii 1099-18 NADH dehydrogenase (ubiquinone) 1 alpha subcomplex 9 (SPSK_00506), partial mRNA	K03953	NDUFA9	NADH dehydrogenase (ubiquinone) 1 alpha subcomplex subunit 9	http://www.genome.jp/dbget-bin/www_bget?ko:K03953	P25284	1224	3.2e-133	NADH-ubiquinone oxidoreductase 40 kDa subunit, mitochondrial OS=Neurospora crassa (strain ATCC 24698 / 74-OR23-1A / CBS 708.71 / DSM 1257 / FGSC 987) OX=367110 GN=nuo40 PE=1 SV=2	PF02738//PF01370//PF01073	Molybdopterin-binding domain of aldehyde dehydrogenase//NAD dependent epimerase/dehydratase family//3-beta hydroxysteroid dehydrogenase/isomerase family	GO:0006694//GO:0008210//GO:0008209//GO:0055114//GO:0008207	steroid biosynthetic process//estrogen metabolic process//androgen metabolic process//oxidation-reduction process//C21-steroid hormone metabolic process	GO:0050662//GO:0003854//GO:0016491//GO:0016616//GO:0003824	obsolete coenzyme binding//3-beta-hydroxy-delta5-steroid dehydrogenase activity//oxidoreductase activity//oxidoreductase activity, acting on the CH-OH group of donors, NAD or NADP as acceptor//catalytic activity	--	--	KOG2865	NADH:ubiquinone oxidoreductase, NDUFA9/39kDa subunit	FALSE	-5.13e-15	1	DOWN	-8.62387	3.08e-08	DOWN	-8.53834	3.43e-08	FALSE	0	1	DOWN	-8.29822	1.69e-07
Cluster-11149.1221	0	0	0	0	1.96	801	1344002597	XP_023883638.1	721	1.4e-73	bifunctional cytochrome P450/NADPH--P450 reductase-like [Quercus suber]	--	--	--	--	--	K00327	POR	NADPH-ferrihemoprotein reductase	http://www.genome.jp/dbget-bin/www_bget?ko:K00327	Q9Y8G7	798	6.5e-84	Bifunctional cytochrome P450/NADPH--P450 reductase OS=Fusarium oxysporum OX=5507 GN=CYP505 PE=1 SV=1	PF00258//PF14724//PF04568//PF00667	Flavodoxin//Mitochondrial-associated sphingomyelin phosphodiesterase//Mitochondrial ATPase inhibitor, IATP//FAD binding domain	GO:0032780//GO:0055114//GO:0006687	negative regulation of ATPase activity//oxidation-reduction process//glycosphingolipid metabolic process	GO:0042030//GO:0010181//GO:0050290//GO:0016491	ATPase inhibitor activity//FMN binding//sphingomyelin phosphodiesterase D activity//oxidoreductase activity	GO:0005739	mitochondrion	KOG1158	NADP/FAD dependent oxidoreductase	FALSE	-5.13e-15	1	DOWN	-7.87789	1.59e-05	DOWN	-7.79252	1.22e-05	FALSE	0	1	DOWN	-7.55287	4.11e-05
Cluster-3890.0	0	0	0	0	1.71	400	1344063457	XP_023915341.1	444	9.5e-42	uncharacterized FAD-binding protein C12C2.03c-like [Quercus suber]	--	--	--	--	--	-	-	-	http://www.genome.jp/dbget-bin/www_bget?ko:-	Q09744	326	1.7e-29	Uncharacterized FAD-binding protein C12C2.03c OS=Schizosaccharomyces pombe (strain 972 / ATCC 24843) OX=284812 GN=SPBC12C2.03c PE=3 SV=1	PF00667	FAD binding domain	GO:0055114	oxidation-reduction process	GO:0016491	oxidoreductase activity	--	--	KOG1158	NADP/FAD dependent oxidoreductase	FALSE	-5.13e-15	1	FALSE	-5.83829	0.0907098	FALSE	-5.75408	0.101513	FALSE	0	1	FALSE	-5.5181	0.104156
Cluster-11149.48500	0	0.05	0	0.52	11.37	1152	1344040089	XP_023907450.1	545	5.3e-53	NADP-dependent oxidoreductase RED1-like [Quercus suber]	--	--	--	--	--	-	-	-	http://www.genome.jp/dbget-bin/www_bget?ko:-	N4WR35	539	1e-53	NADP-dependent oxidoreductase RED1 OS=Cochliobolus heterostrophus (strain C4 / ATCC 48331 / race T) OX=665024 GN=RED1 PE=3 SV=1	PF02254//PF00107	TrkA-N domain//Zinc-binding dehydrogenase	GO:0006813//GO:0055114	potassium ion transport//oxidation-reduction process	--	--	--	--	KOG1196	Predicted NAD-dependent oxidoreductase	FALSE	-3.05807	0.101362	DOWN	-4.84201	1.1e-14	DOWN	-7.98214	1.53e-21	FALSE	-6.17945	0.0382676	DOWN	-10.7969	4.87e-20
Cluster-11149.3064	0	0	0	0.1	4.32	1137	1344015759	XP_023890589.1	884	2.6e-92	uncharacterized protein LOC112002667 [Quercus suber]	--	--	--	--	--	-	-	-	http://www.genome.jp/dbget-bin/www_bget?ko:-	O34812	653	6e-67	Putative NADP-dependent oxidoreductase YfmJ OS=Bacillus subtilis (strain 168) OX=224308 GN=yfmJ PE=2 SV=1	PF00107	Zinc-binding dehydrogenase	GO:0055114	oxidation-reduction process	--	--	--	--	KOG1196	Predicted NAD-dependent oxidoreductase	FALSE	-3.96925	0.835728	DOWN	-5.8023	5.01e-12	DOWN	-9.61971	2.73e-13	FALSE	-3.80692	0.806498	DOWN	-9.37921	4.39e-12
Cluster-11149.1684	0	0	0	0.05	6.18	1150	1344015759	XP_023890589.1	864	5.4e-90	uncharacterized protein LOC112002667 [Quercus suber]	--	--	--	--	--	-	-	-	http://www.genome.jp/dbget-bin/www_bget?ko:-	O34812	675	1.7e-69	Putative NADP-dependent oxidoreductase YfmJ OS=Bacillus subtilis (strain 168) OX=224308 GN=yfmJ PE=2 SV=1	PF00107//PF08046	Zinc-binding dehydrogenase//IlvGEDA operon leader peptide	GO:0055114//GO:0009082	oxidation-reduction process//branched-chain amino acid biosynthetic process	--	--	--	--	KOG1196	Predicted NAD-dependent oxidoreductase	FALSE	-3.05854	1	DOWN	-7.24391	5.51e-16	DOWN	-10.1546	3.08e-16	FALSE	-2.90649	1	DOWN	-9.91403	6.27e-15
Cluster-6410.0	0	0	0	0	1.7	453	1344032754	XP_023899541.1	349	1.1e-30	uncharacterized protein LOC112011403 [Quercus suber]	XM_001227527.1	XM_001227527	39	1.04e-08	Chaetomium globosum CBS 148.51 hypothetical protein (CHGG_09601) partial mRNA	-	-	-	http://www.genome.jp/dbget-bin/www_bget?ko:-	P76113	220	3.8e-17	NADPH-dependent curcumin reductase OS=Escherichia coli (strain K12) OX=83333 GN=curA PE=1 SV=3	PF00107	Zinc-binding dehydrogenase	GO:0055114	oxidation-reduction process	--	--	--	--	KOG1196	Predicted NAD-dependent oxidoreductase	FALSE	-5.13e-15	1	FALSE	-6.24701	0.036604	FALSE	-6.16242	0.0233754	FALSE	0	1	FALSE	-5.92525	0.0393902
Cluster-11149.47671	0	0	0	0.31	12.42	1605	1344043594	XP_023901750.1	383	4.5e-34	oxidoreductase ptaL-like [Quercus suber]	--	--	--	--	--	-	-	-	http://www.genome.jp/dbget-bin/www_bget?ko:-	A0A067XMP1	542	6.3e-54	oxidoreductase ptaL OS=Pestalotiopsis fici (strain W106-1 / CGMCC3.15140) OX=1229662 GN=ptaL PE=2 SV=1	PF02983//PF07992//PF03435//PF00743//PF01266//PF02254	Alpha-lytic protease prodomain//Pyridine nucleotide-disulphide oxidoreductase//Saccharopine dehydrogenase NADP binding domain//Flavin-binding monooxygenase-like//FAD dependent oxidoreductase//TrkA-N domain	GO:0006813//GO:0055114//GO:0006508	potassium ion transport//oxidation-reduction process//proteolysis	GO:0008236//GO:0016491//GO:0004499//GO:0050660//GO:0050661	serine-type peptidase activity//oxidoreductase activity//N,N-dimethylaniline monooxygenase activity//flavin adenine dinucleotide binding//NADP binding	GO:0005576	extracellular region	--	--	FALSE	-6.21554	0.0416009	DOWN	-5.69362	3.18e-19	DOWN	-11.7536	3.79e-26	FALSE	-6.04393	0.0606833	DOWN	-11.5128	1.46e-24
Cluster-11149.48165	0	0	0	0.33	4.32	1138	1343981891	XP_023896135.1	761	4.7e-78	uncharacterized oxidoreductase C115.03-like [Quercus suber]	--	--	--	--	--	-	-	-	http://www.genome.jp/dbget-bin/www_bget?ko:-	O42896	624	1.4e-63	Uncharacterized oxidoreductase C115.03 OS=Schizosaccharomyces pombe (strain 972 / ATCC 24843) OX=284812 GN=SPBC115.03 PE=3 SV=1	PF02894//PF01408//PF03447	oxidoreductase family, C-terminal alpha/beta domain//oxidoreductase family, NAD-binding Rossmann fold//Homoserine dehydrogenase, NAD binding domain	GO:0055114	oxidation-reduction process	GO:0016491//GO:0050661	oxidoreductase activity//NADP binding	--	--	--	--	FALSE	-5.70927	0.101362	DOWN	-4.06553	3.5e-09	DOWN	-9.61971	2.73e-13	FALSE	-5.5387	0.148189	DOWN	-9.37921	4.39e-12
Cluster-6234.0	0	0	0	0.41	1.83	557	1344040029	XP_023907417.1	372	3e-33	NADPH oxidase 1-like [Quercus suber]	XM_014315102.1	XM_014315102	298	1.37e-152	Grosmannia clavigera kw1407 NADPH oxidase partial mRNA	K13447	RBOH	respiratory burst oxidase [EC:1.6.3.- 1.11.1.-]	http://www.genome.jp/dbget-bin/www_bget?ko:K13447	P04839	367	4.3e-34	Cytochrome b-245 heavy chain OS=Homo sapiens OX=9606 GN=CYBB PE=1 SV=2	PF08030//PF00175	Ferric reductase NAD binding domain//oxidoreductase NAD-binding domain	GO:0055114	oxidation-reduction process	GO:0016491	oxidoreductase activity	--	--	KOG0039	Ferric reductase, NADH/NADPH oxidase and related proteins	FALSE	-4.52318	0.566119	FALSE	-2.48462	0.039372	DOWN	-6.8551	0.00238337	FALSE	-4.35711	0.806498	FALSE	-6.61653	0.00625347
Cluster-5951.0	0	0	0	0.04	2.28	1214	1344013182	XP_023889219.1	1351	1.9e-146	saccharopine dehydrogenase [NADP(+), L-glutamate-forming]-like [Quercus suber]	XM_003006208.1	XM_003006208	467	0	Verticillium alfalfae VaMs.102 saccharopine dehydrogenase partial mRNA	K14157	AASS	alpha-aminoadipic semialdehyde synthase [EC:1.5.1.8 1.5.1.9]	http://www.genome.jp/dbget-bin/www_bget?ko:K14157	Q9P4R4	1551	4.7e-171	Saccharopine dehydrogenase [NADP(+), L-glutamate-forming] OS=Magnaporthe oryzae (strain 70-15 / ATCC MYA-4617 / FGSC 8958) OX=242507 GN=LYS3 PE=1 SV=2	PF03447//PF03435//PF01408	Homoserine dehydrogenase, NAD binding domain//Saccharopine dehydrogenase NADP binding domain//oxidoreductase family, NAD-binding Rossmann fold	GO:0055114	oxidation-reduction process	GO:0016491//GO:0050661	oxidoreductase activity//NADP binding	--	--	KOG0172	Lysine-ketoglutarate reductase/saccharopine dehydrogenase	FALSE	-3.05854	1	DOWN	-5.90693	2.3e-09	DOWN	-8.81777	2.19e-09	FALSE	-2.90649	1	DOWN	-8.57752	1.61e-08
Cluster-3832.0	0	0	0	0.13	2.44	2224	1344039044	XP_023906882.1	2796	0	putative glutamate synthase [NADPH] [Quercus suber]	XM_007839947.1	XM_007839947	788	0	Pestalotiopsis fici W106-1 glutamate synthase mRNA	K00264	GLT1	glutamate synthase (NADPH/NADH) [EC:1.4.1.13 1.4.1.14]	http://www.genome.jp/dbget-bin/www_bget?ko:K00264	Q9C102	2389	5.9e-268	Putative glutamate synthase [NADPH] OS=Schizosaccharomyces pombe (strain 972 / ATCC 24843) OX=284812 GN=glt1 PE=2 SV=1	PF00743//PF01593//PF01266//PF01493//PF02826//PF07992//PF01210//PF01494	Flavin-binding monooxygenase-like//Flavin containing amine oxidoreductase//FAD dependent oxidoreductase//GXGXG motif//D-isomer specific 2-hydroxyacid dehydrogenase, NAD binding domain//Pyridine nucleotide-disulphide oxidoreductase//NAD-dependent glycerol-3-phosphate dehydrogenase N-terminus//FAD binding domain	GO:0055114//GO:0046168	oxidation-reduction process//glycerol-3-phosphate catabolic process	GO:0004499//GO:0050661//GO:0050660//GO:0071949//GO:0016616//GO:0051287//GO:0016491	N,N-dimethylaniline monooxygenase activity//NADP binding//flavin adenine dinucleotide binding//FAD binding//oxidoreductase activity, acting on the CH-OH group of donors, NAD or NADP as acceptor//NAD binding//oxidoreductase activity	--	--	KOG0399	Glutamate synthase	FALSE	-5.49146	0.158449	DOWN	-4.61437	2.27e-11	DOWN	-9.95095	4.51e-15	FALSE	-5.32147	0.233253	DOWN	-9.71039	7.92e-14
Cluster-447.0	0	0	0	0	1.7	632	1344052868	XP_023909722.1	608	1.4e-60	uncharacterized protein LOC112021387 [Quercus suber]	XM_031144766.1	XM_031144766	167	1.04e-79	Phialemoniopsis curvata uncharacterized protein (E0L32_009767), partial mRNA	K03778	ldhA	D-lactate dehydrogenase	http://www.genome.jp/dbget-bin/www_bget?ko:K03778	P44501	456	2.3e-44	2-hydroxyacid dehydrogenase homolog OS=Haemophilus influenzae (strain ATCC 51907 / DSM 11121 / KW20 / Rd) OX=71421 GN=ddh PE=3 SV=1	PF00148//PF00389//PF02826	Nitrogenase component 1 type oxidoreductase//D-isomer specific 2-hydroxyacid dehydrogenase, catalytic domain//D-isomer specific 2-hydroxyacid dehydrogenase, NAD binding domain	GO:0055114	oxidation-reduction process	GO:0051287//GO:0016491//GO:0016616	NAD binding//oxidoreductase activity//oxidoreductase activity, acting on the CH-OH group of donors, NAD or NADP as acceptor	--	--	KOG0068	D-3-phosphoglycerate dehydrogenase, D-isomer-specific 2-hydroxy acid dehydrogenase superfamily	FALSE	-5.13e-15	1	DOWN	-7.14501	0.00112797	DOWN	-7.05988	0.00098774	FALSE	0	1	DOWN	-6.82102	0.00255923
Cluster-11149.5663	0.83	0.21	0	1.51	0.21	459	1276264458	PIN20862.1	439	4.1e-41	Flavin-containing monooxygenase [Handroanthus impetiginosus]	--	--	--	--	--	-	-	-	http://www.genome.jp/dbget-bin/www_bget?ko:-	Q9FWW9	306	4.1e-27	Flavin-containing monooxygenase FMO GS-OX-like 2 OS=Arabidopsis thaliana OX=3702 GN=At1g12200 PE=2 SV=1	PF00743//PF01593	Flavin-binding monooxygenase-like//Flavin containing amine oxidoreductase	GO:0055114	oxidation-reduction process	GO:0016491//GO:0050660//GO:0050661//GO:0004499	oxidoreductase activity//flavin adenine dinucleotide binding//NADP binding//N,N-dimethylaniline monooxygenase activity	--	--	--	--	FALSE	-2.50237	0.288411	FALSE	2.35186	0.271886	FALSE	-0.241441	1	FALSE	-0.211303	1	FALSE	2.06469	0.618116
Cluster-11149.22	0	0.99	0	0.12	3.18	603	1276260754	PIN17728.1	948	5.2e-100	Flavin-containing monooxygenase [Handroanthus impetiginosus]	XM_011084783.2	XM_011084783	298	1.49e-152	PREDICTED: Sesamum indicum probable indole-3-pyruvate monooxygenase YUCCA5 (LOC105165693), mRNA	K11816	YUCCA	indole-3-pyruvate monooxygenase	http://www.genome.jp/dbget-bin/www_bget?ko:K11816	Q9SVU0	798	4.9e-84	Probable indole-3-pyruvate monooxygenase YUCCA8 OS=Arabidopsis thaliana OX=3702 GN=YUC8 PE=2 SV=1	PF07992//PF00743	Pyridine nucleotide-disulphide oxidoreductase//Flavin-binding monooxygenase-like	GO:0055114	oxidation-reduction process	GO:0004499//GO:0016491//GO:0050661//GO:0050660	N,N-dimethylaniline monooxygenase activity//oxidoreductase activity//NADP binding//flavin adenine dinucleotide binding	--	--	--	--	FALSE	3.09978	0.144609	DOWN	-4.93784	1.12e-05	FALSE	-1.95378	0.0232908	FALSE	-2.90649	1	DOWN	-7.60916	2.81e-05
Cluster-6447.0	0	0	0	0	3.95	402	747092496	XP_011094017.1	477	1.4e-45	probable flavin-containing monooxygenase 1 [Sesamum indicum]	XM_028921528.1	XM_028921528	59	6.98e-20	PREDICTED: Prosopis alba probable flavin-containing monooxygenase 1 (LOC114734041), mRNA	-	-	-	http://www.genome.jp/dbget-bin/www_bget?ko:-	Q9LMA1	344	1.4e-31	Probable flavin-containing monooxygenase 1 OS=Arabidopsis thaliana OX=3702 GN=FMO1 PE=2 SV=1	PF07992//PF01593//PF00743//PF01266	Pyridine nucleotide-disulphide oxidoreductase//Flavin containing amine oxidoreductase//Flavin-binding monooxygenase-like//FAD dependent oxidoreductase	GO:0055114	oxidation-reduction process	GO:0016491//GO:0050660//GO:0050661//GO:0004499	oxidoreductase activity//flavin adenine dinucleotide binding//NADP binding//N,N-dimethylaniline monooxygenase activity	--	--	KOG1399	Flavin-containing monooxygenase	FALSE	-5.13e-15	1	DOWN	-7.0462	0.00170683	DOWN	-6.96112	0.00152724	FALSE	0	1	DOWN	-6.72239	0.00398727
Cluster-11149.46722	0	0	0	0	1.57	470	--	--	--	--	--	--	--	--	--	--	--	--	--	--	--	--	--	--	PF07992//PF01210//PF02254//PF01266//PF02826//PF00743//PF01494	Pyridine nucleotide-disulphide oxidoreductase//NAD-dependent glycerol-3-phosphate dehydrogenase N-terminus//TrkA-N domain//FAD dependent oxidoreductase//D-isomer specific 2-hydroxyacid dehydrogenase, NAD binding domain//Flavin-binding monooxygenase-like//FAD binding domain	GO:0046168//GO:0006813//GO:0055114	glycerol-3-phosphate catabolic process//potassium ion transport//oxidation-reduction process	GO:0050660//GO:0050661//GO:0071949//GO:0004499//GO:0051287//GO:0016491//GO:0016616	flavin adenine dinucleotide binding//NADP binding//FAD binding//N,N-dimethylaniline monooxygenase activity//NAD binding//oxidoreductase activity//oxidoreductase activity, acting on the CH-OH group of donors, NAD or NADP as acceptor	--	--	--	--	FALSE	-5.13e-15	1	FALSE	-6.24701	0.036604	FALSE	-6.16242	0.0233754	FALSE	0	1	FALSE	-5.92525	0.0393902
Cluster-5524.0	0	0	0	0.13	2.02	1573	1344032764	XP_023899547.1	583	2.8e-57	FAD-binding monooxygenase aflW-like [Quercus suber]	CP023324.1	CP023324	174	3.44e-83	Cordyceps militaris strain ATCC 34164 chromosome VII, complete sequence	-	-	-	http://www.genome.jp/dbget-bin/www_bget?ko:-	M2Y0N8	510	3.2e-50	FAD-binding monooxygenase moxY OS=Dothistroma septosporum (strain NZE10 / CBS 128990) OX=675120 GN=moxY PE=2 SV=1	PF00743//PF01266//PF07992	Flavin-binding monooxygenase-like//FAD dependent oxidoreductase//Pyridine nucleotide-disulphide oxidoreductase	GO:0055114	oxidation-reduction process	GO:0004499//GO:0050660//GO:0050661//GO:0016491	N,N-dimethylaniline monooxygenase activity//flavin adenine dinucleotide binding//NADP binding//oxidoreductase activity	--	--	--	--	FALSE	-4.92245	0.380656	DOWN	-4.33056	5.32e-08	DOWN	-9.09897	1.17e-10	FALSE	-4.75444	0.557126	DOWN	-8.85862	1.14e-09
Cluster-2193.0	0	0	0	0	1.19	504	326522839	BAJ88465.1	684	1.8e-69	predicted protein [Hordeum vulgare subsp. vulgare]	LR732083.1	LR732083	50	8.95e-15	Armillaria ostoyae strain C18/9 genome assembly, chromosome: LG9	K00036	G6PD, zwf	glucose-6-phosphate 1-dehydrogenase [EC:1.1.1.49 1.1.1.363]	http://www.genome.jp/dbget-bin/www_bget?ko:K00036	P41764	645	2.2e-66	Glucose-6-phosphate 1-dehydrogenase OS=Emericella nidulans (strain FGSC A4 / ATCC 38163 / CBS 112.46 / NRRL 194 / M139) OX=227321 GN=gsdA PE=3 SV=2	PF01408//PF00479//PF02781	oxidoreductase family, NAD-binding Rossmann fold//Glucose-6-phosphate dehydrogenase, NAD binding domain//Glucose-6-phosphate dehydrogenase, C-terminal domain	GO:0006006//GO:0006098//GO:0055114//GO:0006749	glucose metabolic process//pentose-phosphate shunt//oxidation-reduction process//glutathione metabolic process	GO:0016491//GO:0004345//GO:0050661//GO:0016614	oxidoreductase activity//glucose-6-phosphate dehydrogenase activity//NADP binding//oxidoreductase activity, acting on CH-OH group of donors	--	--	KOG0563	Glucose-6-phosphate 1-dehydrogenase	FALSE	-5.13e-15	1	FALSE	-6.05708	0.0575446	FALSE	-5.97265	0.0376684	FALSE	0	1	FALSE	-5.73599	0.0636174
Cluster-3989.0	0	0	0	0.76	2.07	416	1376847663	PTQ38271.1	320	2.4e-27	hypothetical protein MARPO_0052s0062 [Marchantia polymorpha]	XM_025697505.1	XM_025697505	47	3.39e-13	Aspergillus homomorphus CBS 101889 flavin-binding monooxygenase-like protein (BO97DRAFT_431800), partial mRNA	--	--	--	--	--	--	--	--	PF00743//PF07992	Flavin-binding monooxygenase-like//Pyridine nucleotide-disulphide oxidoreductase	GO:0055114	oxidation-reduction process	GO:0016491//GO:0050661//GO:0050660//GO:0004499	oxidoreductase activity//NADP binding//flavin adenine dinucleotide binding//N,N-dimethylaniline monooxygenase activity	--	--	--	--	FALSE	-4.52318	0.566119	FALSE	-1.79151	0.276207	FALSE	-6.16242	0.0233754	FALSE	-4.35711	0.806498	FALSE	-5.92525	0.0393902
Cluster-2537.0	0	0	0	0	2.44	354	694453111	XP_009351348.1	165	1.9e-09	PREDICTED: phenol 2-monooxygenase-like [Pyrus x bretschneideri]	--	--	--	--	--	--	--	--	--	Q3S8Q4	133	3.7e-07	6-methylpretetramide 4-monooxygenase OS=Streptomyces rimosus OX=1927 GN=oxyL PE=1 SV=1	PF01266//PF02737//PF07992//PF01494//PF00899//PF02254//PF03721//PF02826	FAD dependent oxidoreductase//3-hydroxyacyl-CoA dehydrogenase, NAD binding domain//Pyridine nucleotide-disulphide oxidoreductase//FAD binding domain//ThiF family//TrkA-N domain//UDP-glucose/GDP-mannose dehydrogenase family, NAD binding domain//D-isomer specific 2-hydroxyacid dehydrogenase, NAD binding domain	GO:0006568//GO:0006552//GO:0006550//GO:0006633//GO:0006813//GO:0055114//GO:0006554//GO:0006631//GO:0018874//GO:0006574	tryptophan metabolic process//leucine catabolic process//isoleucine catabolic process//fatty acid biosynthetic process//potassium ion transport//oxidation-reduction process//lysine catabolic process//fatty acid metabolic process//benzoate metabolic process//valine catabolic process	GO:0008641//GO:0051287//GO:0003857//GO:0071949//GO:0016616//GO:0016491	ubiquitin-like modifier activating enzyme activity//NAD binding//3-hydroxyacyl-CoA dehydrogenase activity//FAD binding//oxidoreductase activity, acting on the CH-OH group of donors, NAD or NADP as acceptor//oxidoreductase activity	--	--	--	--	FALSE	-5.13e-15	1	FALSE	-5.83829	0.0907098	FALSE	-5.75408	0.101513	FALSE	0	1	FALSE	-5.5181	0.104156
Cluster-3385.0	0	0	0	0	3.34	378	1343985462	XP_023874604.1	250	2.8e-19	uncharacterized protein LOC111987129 [Quercus suber]	--	--	--	--	--	-	-	-	http://www.genome.jp/dbget-bin/www_bget?ko:-	--	--	--	--	PF07992//PF01494//PF01593//PF00743//PF01266	Pyridine nucleotide-disulphide oxidoreductase//FAD binding domain//Flavin containing amine oxidoreductase//Flavin-binding monooxygenase-like//FAD dependent oxidoreductase	GO:0055114	oxidation-reduction process	GO:0071949//GO:0016491//GO:0050660//GO:0050661//GO:0004499	FAD binding//oxidoreductase activity//flavin adenine dinucleotide binding//NADP binding//N,N-dimethylaniline monooxygenase activity	--	--	KOG1399	Flavin-containing monooxygenase	FALSE	-5.13e-15	1	FALSE	-6.56514	0.0149166	FALSE	-6.48032	0.00923724	FALSE	0	1	FALSE	-6.24242	0.0245024
Cluster-11149.47402	0	0	0	0.67	53.54	1129	1343986468	XP_023875133.1	321	4.9e-27	bifunctional pinoresinol-lariciresinol reductase 2-like [Quercus suber]	--	--	--	--	--	-	-	-	http://www.genome.jp/dbget-bin/www_bget?ko:-	P52580	148	2.1e-08	Isoflavone reductase homolog IRL OS=Zea mays OX=4577 GN=IRL PE=2 SV=1	PF02254//PF01370//PF01113//PF01408//PF02629//PF02826//PF02882//PF03446//PF00208//PF01118	TrkA-N domain//NAD dependent epimerase/dehydratase family//Dihydrodipicolinate reductase, N-terminus//oxidoreductase family, NAD-binding Rossmann fold//CoA binding domain//D-isomer specific 2-hydroxyacid dehydrogenase, NAD binding domain//Tetrahydrofolate dehydrogenase/cyclohydrolase, NAD(P)-binding domain//NAD binding domain of 6-phosphogluconate dehydrogenase//Glutamate/Leucine/Phenylalanine/Va…	GO:0009085//GO:0046487//GO:0009089//GO:0006520//GO:0006813//GO:0055114//GO:0009396	lysine biosynthetic process//glyoxylate metabolic process//lysine biosynthetic process via diaminopimelate//cellular amino acid metabolic process//potassium ion transport//oxidation-reduction process//folic acid-containing compound biosynthetic process	GO:0004488//GO:0016491//GO:0003824//GO:0008839//GO:0050661//GO:0048037//GO:0051287//GO:0016620//GO:0050662	methylenetetrahydrofolate dehydrogenase (NADP+) activity//oxidoreductase activity//catalytic activity//4-hydroxy-tetrahydrodipicolinate reductase//NADP binding//obsolete cofactor binding//NAD binding//oxidoreductase activity, acting on the aldehyde or oxo group of donors, NAD or NADP as acceptor//obsolete coenzyme binding	--	--	--	--	FALSE	-6.69541	0.00700451	DOWN	-6.6955	1.13e-26	DOWN	-13.235	2.77e-36	FALSE	-6.5231	0.00968287	DOWN	-12.9942	1.42e-34
Cluster-11149.48525	0	0	0	0	1.96	735	1373907189	XP_024378012.1	256	1.1e-19	uncharacterized protein YMR315W-like [Physcomitrella patens]	--	--	--	--	--	-	-	-	http://www.genome.jp/dbget-bin/www_bget?ko:-	Q04869	163	2.6e-10	Uncharacterized protein YMR315W OS=Saccharomyces cerevisiae (strain ATCC 204508 / S288c) OX=559292 GN=YMR315W PE=1 SV=1	PF02894//PF00763//PF01408	oxidoreductase family, C-terminal alpha/beta domain//Tetrahydrofolate dehydrogenase/cyclohydrolase, catalytic domain//oxidoreductase family, NAD-binding Rossmann fold	GO:0055114//GO:0009396//GO:0046487	oxidation-reduction process//folic acid-containing compound biosynthetic process//glyoxylate metabolic process	GO:0016491//GO:0004488	oxidoreductase activity//methylenetetrahydrofolate dehydrogenase (NADP+) activity	--	--	--	--	FALSE	-5.13e-15	1	DOWN	-7.69431	4.77e-05	DOWN	-7.60898	3.74e-05	FALSE	0	1	DOWN	-7.36949	0.000133624
Cluster-5310.0	0	0	0	0.02	2.97	1990	1343991262	XP_023877633.1	1297	5.8e-140	superoxide-generating NADPH oxidase heavy chain subunit A-like [Quercus suber]	XM_007298845.1	XM_007298845	255	4.1e-128	Stereum hirsutum FP-91666 SS1 NADPH oxidase isoform 1 (STEHIDRAFT_117511), mRNA	-	-	-	http://www.genome.jp/dbget-bin/www_bget?ko:-	Q9XYS3	636	9.8e-65	Superoxide-generating NADPH oxidase heavy chain subunit A OS=Dictyostelium discoideum OX=44689 GN=noxA PE=2 SV=1	PF00175//PF08022//PF08030	oxidoreductase NAD-binding domain//FAD-binding domain//Ferric reductase NAD binding domain	GO:0055114	oxidation-reduction process	GO:0016491	oxidoreductase activity	--	--	--	--	FALSE	-3.05854	1	DOWN	-7.13966	2.16e-15	DOWN	-10.0504	1.22e-15	FALSE	-2.90649	1	DOWN	-9.80981	2.54e-14
Cluster-2915.0	0	0	0	0	3.06	603	1344039044	XP_023906882.1	744	2.3e-76	putative glutamate synthase [NADPH] [Quercus suber]	XM_007361223.1	XM_007361223	218	4.41e-108	Dichomitus squalens LYAD-421 SS1 NADPH-dependent glutamate synthase (DICSQDRAFT_177406), mRNA	K00264	GLT1	glutamate synthase (NADPH/NADH) [EC:1.4.1.13 1.4.1.14]	http://www.genome.jp/dbget-bin/www_bget?ko:K00264	Q9C102	711	5.9e-74	Putative glutamate synthase [NADPH] OS=Schizosaccharomyces pombe (strain 972 / ATCC 24843) OX=284812 GN=glt1 PE=2 SV=1	PF07992	Pyridine nucleotide-disulphide oxidoreductase	GO:0055114	oxidation-reduction process	GO:0016491	oxidoreductase activity	--	--	KOG0399	Glutamate synthase	FALSE	-5.13e-15	1	DOWN	-7.87789	1.59e-05	DOWN	-7.79252	1.22e-05	FALSE	0	1	DOWN	-7.55287	4.11e-05
Cluster-522.0	0	0	0	0	1.45	518	1344039104	XP_023906916.1	448	4.2e-42	NADPH dehydrogenase afvA-like [Quercus suber]	XM_003045829.1	XM_003045829	241	6.14e-121	Nectria haematococca mpVI 77-13-4 hypothetical protein, mRNA	-	-	-	http://www.genome.jp/dbget-bin/www_bget?ko:-	B8N8Q9	450	9.4e-44	NADPH dehydrogenase afvA OS=Aspergillus flavus (strain ATCC 200026 / FGSC A1120 / NRRL 3357 / JCM 12722 / SRRC 167) OX=332952 GN=afvA PE=2 SV=1	PF00724	NADH:flavin oxidoreductase / NADH oxidase family	GO:0055114	oxidation-reduction process	GO:0010181//GO:0016491	FMN binding//oxidoreductase activity	--	--	--	--	FALSE	-5.13e-15	1	FALSE	-6.41483	0.0234343	FALSE	-6.33011	0.0146451	FALSE	0	1	FALSE	-6.09253	0.0245024
Cluster-1529.0	0	0	0	0	2.96	365	1344039104	XP_023906916.1	330	1.4e-28	NADPH dehydrogenase afvA-like [Quercus suber]	--	--	--	--	--	-	-	-	http://www.genome.jp/dbget-bin/www_bget?ko:-	B8N8Q9	296	4.8e-26	NADPH dehydrogenase afvA OS=Aspergillus flavus (strain ATCC 200026 / FGSC A1120 / NRRL 3357 / JCM 12722 / SRRC 167) OX=332952 GN=afvA PE=2 SV=1	PF00724	NADH:flavin oxidoreductase / NADH oxidase family	GO:0055114	oxidation-reduction process	GO:0016491//GO:0010181	oxidoreductase activity//FMN binding	--	--	--	--	FALSE	-5.13e-15	1	FALSE	-6.24701	0.036604	FALSE	-6.16242	0.0233754	FALSE	0	1	FALSE	-5.92525	0.0393902
Cluster-11149.1014	0	0	0	0.18	11.38	1185	594591719	BAO53980.1	1020	4.6e-108	NADPH-dependent thioredoxin reductase [Euglena gracilis]	XM_014800259.1	XM_014800259	254	8.67e-128	Moesziomyces antarcticus thioredoxin reductase partial mRNA	K00384	trxB	thioredoxin reductase (NADPH)	http://www.genome.jp/dbget-bin/www_bget?ko:K00384	Q6C7L4	1190	3.4e-129	Thioredoxin reductase OS=Yarrowia lipolytica (strain CLIB 122 / E 150) OX=284591 GN=TRR1 PE=3 SV=1	PF01266//PF01494//PF03768//PF07992	FAD dependent oxidoreductase//FAD binding domain//Attacin, N-terminal region//Pyridine nucleotide-disulphide oxidoreductase	GO:0055114	oxidation-reduction process	GO:0071949//GO:0016491	FAD binding//oxidoreductase activity	GO:0005576	extracellular region	KOG0404	Thioredoxin reductase	FALSE	-4.92245	0.380656	DOWN	-6.32287	2.56e-18	DOWN	-11.0912	6.94e-22	FALSE	-4.75444	0.557126	DOWN	-10.8505	2.15e-20
Cluster-5163.0	0	0	0	0.46	1.86	435	669030102	CDM84515.1	386	5.5e-35	unnamed protein product [Triticum aestivum]	--	--	--	--	--	K03809	wrbA	NAD(P)H dehydrogenase (quinone)	http://www.genome.jp/dbget-bin/www_bget?ko:K03809	Q9AYU0	360	2.2e-33	Quinone-oxidoreductase QR2 OS=Triphysaria versicolor OX=64093 PE=1 SV=1	PF03358//PF00258	NADPH-dependent FMN reductase//Flavodoxin	--	--	GO:0016491//GO:0010181	oxidoreductase activity//FMN binding	--	--	KOG3135	1,4-benzoquinone reductase-like; Trp repressor binding protein-like/protoplast-secreted protein	FALSE	-3.96925	0.835728	FALSE	-2.34396	0.276207	FALSE	-6.16242	0.0233754	FALSE	-3.80692	0.806498	FALSE	-5.92525	0.0393902
Cluster-11149.47571	0	0	0	0.62	28.91	862	1343966188	XP_023911166.1	688	1e-69	minor allergen Alt a 7-like [Quercus suber]	XM_007383967.1	XM_007383967	176	1.43e-84	Punctularia strigosozonata HHB-11173 SS5 NADH:quinone oxidoreductase (PUNSTDRAFT_120592), partial mRNA	-	-	-	http://www.genome.jp/dbget-bin/www_bget?ko:-	P42058	698	2.7e-72	Minor allergen Alt a 7 OS=Alternaria alternata OX=5599 GN=ALTA7 PE=1 SV=1	PF03358//PF00258	NADPH-dependent FMN reductase//Flavodoxin	--	--	GO:0010181//GO:0016491	FMN binding//oxidoreductase activity	--	--	KOG3135	1,4-benzoquinone reductase-like; Trp repressor binding protein-like/protoplast-secreted protein	FALSE	-6.0657	0.0663758	DOWN	-5.91179	3.97e-20	DOWN	-11.822	1.32e-26	FALSE	-5.89436	0.093697	DOWN	-11.5813	5.13e-25
Cluster-362.0	0	0	0	0	2.36	488	1344071728	XP_023919656.1	584	6.8e-58	isocitrate dehydrogenase [NADP], mitochondrial-like [Quercus suber]	XM_016735595.1	XM_016735595	230	7.51e-115	Sporothrix schenckii 1099-18 isocitrate dehydrogenase (SPSK_09014), partial mRNA	K00031	IDH1, IDH2, icd	isocitrate dehydrogenase	http://www.genome.jp/dbget-bin/www_bget?ko:K00031	P79089	581	5.7e-59	Isocitrate dehydrogenase [NADP], mitochondrial OS=Aspergillus niger OX=5061 GN=icdA PE=2 SV=1	PF00180//PF01500	Isocitrate/isopropylmalate dehydrogenase//Keratin, high sulfur B2 protein	GO:0055114	oxidation-reduction process	GO:0016616	oxidoreductase activity, acting on the CH-OH group of donors, NAD or NADP as acceptor	GO:0045095	keratin filament	KOG1526	NADP-dependent isocitrate dehydrogenase	FALSE	-5.13e-15	1	DOWN	-6.94013	0.00260569	DOWN	-6.8551	0.00238337	FALSE	0	1	FALSE	-6.61653	0.00625347
Cluster-4783.0	0	0	0	0.19	1.75	915	971513506	GAQ84690.1	940	6.6e-99	NADP+-dependent isocitrate dehydrogenase [Klebsormidium nitens]	XM_009218042.1	XM_009218042	437	0	Gaeumannomyces tritici R3-111a-1 isocitrate dehydrogenase mRNA	K00031	IDH1, IDH2, icd	isocitrate dehydrogenase	http://www.genome.jp/dbget-bin/www_bget?ko:K00031	P79089	1021	1e-109	Isocitrate dehydrogenase [NADP], mitochondrial OS=Aspergillus niger OX=5061 GN=icdA PE=2 SV=1	PF00180	Isocitrate/isopropylmalate dehydrogenase	GO:0055114	oxidation-reduction process	GO:0016616	oxidoreductase activity, acting on the CH-OH group of donors, NAD or NADP as acceptor	--	--	KOG1526	NADP-dependent isocitrate dehydrogenase	FALSE	-4.52318	0.566119	DOWN	-3.53296	0.000234856	DOWN	-7.90307	5.91e-06	FALSE	-4.35711	0.806498	DOWN	-7.66333	2.81e-05
Cluster-4109.0	0	0	0	0	1.8	1734	1344032676	XP_023899499.1	2287	8.1e-255	sulfite reductase [NADPH] subunit beta-like [Quercus suber]	XM_003045061.1	XM_003045061	547	0	Nectria haematococca mpVI 77-13-4 predicted protein, mRNA	K00392	sir	sulfite reductase (ferredoxin)	http://www.genome.jp/dbget-bin/www_bget?ko:K00392	Q1K9C2	1875	1.8e-208	Sulfite reductase [NADPH] subunit beta OS=Schizosaccharomyces pombe (strain 972 / ATCC 24843) OX=284812 GN=sir1 PE=3 SV=1	PF01077//PF00258//PF03460	Nitrite and sulphite reductase 4Fe-4S domain//Flavodoxin//Nitrite/Sulfite reductase ferredoxin-like half domain	GO:0055114	oxidation-reduction process	GO:0020037//GO:0051536//GO:0016491//GO:0010181	heme binding//iron-sulfur cluster binding//oxidoreductase activity//FMN binding	--	--	KOG1159	NADP-dependent flavoprotein reductase	FALSE	-5.13e-15	1	DOWN	-9.18457	1.83e-10	DOWN	-9.09897	1.17e-10	FALSE	0	1	DOWN	-8.85862	1.14e-09
Cluster-11149.48926	0	0	0	0.11	2.63	2193	1343996850	XP_023880558.1	218	8.4e-15	ferric/cupric reductase transmembrane component 7-like [Quercus suber]	--	--	--	--	--	K00521	E1.16.1.7	ferric-chelate reductase	http://www.genome.jp/dbget-bin/www_bget?ko:K00521	O94727	203	1.7e-14	Ferric/cupric reductase transmembrane component 2 OS=Schizosaccharomyces pombe (strain 972 / ATCC 24843) OX=284812 GN=frp2 PE=3 SV=1	PF05887//PF08022//PF08030//PF01292	Procyclic acidic repetitive protein (PARP)//FAD-binding domain//Ferric reductase NAD binding domain//Prokaryotic cytochrome b561	GO:0055114//GO:0006118	oxidation-reduction process//obsolete electron transport	GO:0016491//GO:0009055	oxidoreductase activity//electron transfer activity	GO:0016020//GO:0016021	membrane//integral component of membrane	KOG0039	Ferric reductase, NADH/NADPH oxidase and related proteins	FALSE	-5.23483	0.244997	DOWN	-4.95807	8.25e-12	DOWN	-10.0383	1.41e-15	FALSE	-5.06564	0.362672	DOWN	-9.79775	2.98e-14
Cluster-920.0	0	0	0	0	2.01	399	--	--	--	--	--	--	--	--	--	--	-	-	-	http://www.genome.jp/dbget-bin/www_bget?ko:-	P52556	146	1.3e-08	Flavin reductase (NADPH) OS=Bos taurus OX=9913 GN=BLVRB PE=1 SV=2	PF01073//PF01370//PF02254//PF03435	3-beta hydroxysteroid dehydrogenase/isomerase family//NAD dependent epimerase/dehydratase family//TrkA-N domain//Saccharopine dehydrogenase NADP binding domain	GO:0008207//GO:0055114//GO:0006813//GO:0008209//GO:0008210//GO:0006694	C21-steroid hormone metabolic process//oxidation-reduction process//potassium ion transport//androgen metabolic process//estrogen metabolic process//steroid biosynthetic process	GO:0016616//GO:0003824//GO:0003854//GO:0016491//GO:0050662	oxidoreductase activity, acting on the CH-OH group of donors, NAD or NADP as acceptor//catalytic activity//3-beta-hydroxy-delta5-steroid dehydrogenase activity//oxidoreductase activity//obsolete coenzyme binding	--	--	--	--	FALSE	-5.13e-15	1	FALSE	-6.05708	0.0575446	FALSE	-5.97265	0.0376684	FALSE	0	1	FALSE	-5.73599	0.0636174
Cluster-4361.0	0	0	0	0.14	2.9	1157	388496436	AFK36284.1	1103	1.1e-117	unknown [Medicago truncatula]	XM_007394797.1	XM_007394797	258	5.06e-130	Phanerochaete carnosa HHB-10118-sp hypothetical protein (PHACADRAFT_142124), mRNA	K00008	SORD, gutB	L-iditol 2-dehydrogenase	http://www.genome.jp/dbget-bin/www_bget?ko:K00008	Q4R0J7	1246	1.1e-135	D-arabinitol dehydrogenase 1 OS=Uromyces fabae OX=55588 GN=ARD1 PE=1 SV=1	PF08240//PF03447//PF01494//PF03435//PF00107	Alcohol dehydrogenase GroES-like domain//Homoserine dehydrogenase, NAD binding domain//FAD binding domain//Saccharopine dehydrogenase NADP binding domain//Zinc-binding dehydrogenase	GO:0055114	oxidation-reduction process	GO:0050661//GO:0016491//GO:0071949	NADP binding//oxidoreductase activity//FAD binding	--	--	KOG0024	Sorbitol dehydrogenase	FALSE	-4.52318	0.566119	DOWN	-4.70564	1.6e-08	DOWN	-9.07555	1.47e-10	FALSE	-4.35711	0.806498	DOWN	-8.83521	1.47e-09
[truncated: 93 more rows]
[truncated: 13 more columns]
